# Supplementary material for: Nucleolin perturbation alters membrane lipid homeostasis
Source: Royal Society of Chemistry journal article supplement (doi:10.1039/d5mo00088b), 2025-10-28
Supplement: d5mo00088b1.xlsx [file d5mo00088b1.xlsx]

## Sheet: Sheet1 (4)
Merged						AS1411/control	AS1411/control	AS1411/control		AS1411/control	AS1411/control	AS1411/control
						median(log2 ratio(H/HL))-corrected	median(log2 ratio(H/HL))-corrected	median(log2 ratio(H/HL))-corrected		median(log2 ratio(H/HL))-corrected	median(log2 ratio(H/HL))-corrected	median(log2 ratio(H/HL))-corrected		24h				48h
Acc #	Gene	Best Expect Val	Protein MW	Species	Protein Name	24H#3	24H#4	24H#5		48H#3	48H#4	48H#5		count	mean	-LOG10(P value)		count	mean	-LOG10(P value)
E9Q616	Ahnak	3.3e-48	604258	MOUSE	Protein Ahnak	-0.0722911	-0.0446019	-0.111536		-0.093003	-0.154042	-0.0829825		3	-0.0761431	1.52791		3	-0.110009	1.71656
E9QN87	Plec	2.3e-23	534192	MOUSE	Plectin	-0.0986375	-0.293016	0.0198484		-0.0957009	-0.122661	-0.102895		3	-0.123935	0.813728		3	-0.107086	2.5515
B1ARU4	Macf1	1.1e-69	831657	MOUSE	Microtubule-actin cross-linking factor 1	0.0304353	0.0330492	0.0599184		0.163513	0.145115	0.100003		3	0.0411343	1.61376		3	0.13621	2.03035
Q5SVX3	Ddx56	2.3e-17	61212.6	MOUSE	DEAD (Asp-Glu-Ala-Asp) box polypeptide 56	-0.324899	0.0695518	-0.66301		-0.971209	-1.1233	-1.1687		3	-0.306119	0.846114		3	-1.08774	2.82381
P63325	Rps10	1e-15	18915.9	MOUSE	40S ribosomal protein S10	1.74526	-0.202361	-0.273684		-0.382649	-0.610095	-0.566285		3	0.423072	0.531731		3	-0.519676	2.05791
Q8R0W0	Eppk1	6.3e-13	724674	MOUSE	Epiplakin	0.0295642		0.0770627		0.670991		0.216773		2	0.0533135	0.874858		2	0.443882	0.822363
Q8VDD5	Myh9	2.9e-24	226374	MOUSE	Myosin-9	0.0858578	0.109606	0.200107		0.0861853	0.132086	0.124246		3	0.131857	1.50064		3	0.114172	2.12299
Q3UH59	Myh10	1.8e-32	233451	MOUSE	Myosin-10	0.124629	0.0249835	0.152021		0.308862	0.349171	0.186775		3	0.100545	1.21764		3	0.281602	1.84215
Q69ZX3	Myh11	6.2e-20	228270	MOUSE	MKIAA0866 protein (Fragment)	0.204409	-0.146926	0.102855		0.230242	0.23594	0.0320568		3	0.0534461	0.481759		3	0.166079	1.18204
Q6URW6	Myh14	2.4e-16	228588	MOUSE	Myosin-14	0.048395		0.133533		1.25696	-0.247524			2	0.0909642	0.855971		2	0.50472	0.505998
P13541	Myh3	8.9e-10	223792	MOUSE	Myosin-3		-4.81223			-0.543333				1	-4.81223	#DIV/0!		1	-0.543333	#DIV/0!
Q9JHU4	Dync1h1	4.4e-22	532050	MOUSE	Cytoplasmic dynein 1 heavy chain 1	0.15074	0.234292	0.21485		0.374415	0.435152	0.282535		3	0.199961	2.1089		3	0.364034	2.13885
E9Q9X1	Dst	1.2e-21	835698	MOUSE	Dystonin	-0.0587547	-0.112015	0.0542007		0.0991695	-0.0782788	0.0578986		3	-0.0388564	0.592663		3	0.0262631	0.473218
A3KGU5	Sptan1	6.3e-24	282897	MOUSE	Spectrin alpha chain, non-erythrocytic 1	0.0399924	-0.0260142	0.0629704		0.0712704	0.0115387	0.122966		3	0.0256495	0.659893		3	0.0685917	1.07873
P08032	Spta1	4e-11	279867	MOUSE	Spectrin alpha chain, erythrocytic 1			0.193791						1	0.193791	#DIV/0!		0	#DIV/0!	#DIV/0!
Q80X90	Flnb	9.1e-26	277827	MOUSE	Filamin-B	0.0223011	0.0248505	0.0905503		0.120391	0.0961698	0.169262		3	0.0459006	1.05495		3	0.128607	1.87259
B9EKP5	Flna	7.4e-30	280475	MOUSE	Filamin, alpha	0.035655	0.0743391	0.153449		-0.0137977	-0.0536012	0.0977805		3	0.0878142	1.19774		3	0.0101272	0.374746
Q8VHX6	Flnc	4.5e-26	291122	MOUSE	Filamin-C	-0.281596	-0.372246	-0.171932		-0.205421	-0.160549	-0.0362393		3	-0.275258	1.68269		3	-0.13407	1.22987
Q62261	Sptbn1	5.9e-23	274225	MOUSE	Spectrin beta chain, non-erythrocytic 1	0.0572766	0.0187171	0.0789307		0.0710132	0.0198517	0.0967864		3	0.0516415	1.30425		3	0.0625504	1.26128
Q3UGZ4	Sptbn2	3.6e-13	270937	MOUSE	Putative uncharacterized protein			4.45904						1	4.45904	#DIV/0!		0	#DIV/0!	#DIV/0!
P26039	Tln1	6e-22	269824	MOUSE	Talin-1	0.171059	0.178158	0.126419		0.210429	0.223634	0.176932		3	0.158545	2.2894		3	0.203665	2.6359
B2RY15	Tln2	3.4e-22	271648	MOUSE	Tln2 protein	0.202853	0.312526	0.188067		0.206492	-0.0120266	-0.35445		3	0.234482	1.87127		3	-0.0533281	0.411769
E9PVZ8	Golgb1	2.9e-23	370157	MOUSE	Protein Golgb1	0.238784	0.109148	0.180279		0.465644	0.38886	0.320094		3	0.17607	1.67312		3	0.391533	2.24672
P52293	Kpna2	2.2e-23	57928.6	MOUSE	Importin subunit alpha-2	0.272574	0.186917	-0.287661		0.158077	-0.568354	0.286643		3	0.0572766	0.412522		3	-0.0412114	0.35107
Q9ERU9	Ranbp2	3.2e-41	341124	MOUSE	E3 SUMO-protein ligase RanBP2	-0.103134	-0.0577343	-0.0436503		-0.269908	-0.253803	-0.139631		3	-0.0681728	1.50278		3	-0.221114	1.7863
Q9CR16	Ppid	1.4e-26	40742.9	MOUSE	Peptidyl-prolyl cis-trans isomerase D	-0.301076	-0.369962	-0.102855		-0.242799	-0.248895	-0.212011		3	-0.257964	1.37509		3	-0.234569	2.92816
Q99KR7	Ppif	2.1e-14	21737.1	MOUSE	Peptidyl-prolyl cis-trans isomerase F, mitochondrial		-0.410253	-0.300571		0.0983454	-0.271809			2	-0.355412	1.31219		2	-0.0867319	0.443088
F6ZDS4	Tpr	6.2e-24	273992	MOUSE	Nucleoprotein TPR	-0.109381	-0.230586	-0.0612016		-0.177453	-0.24798	0.0278419		3	-0.133723	1.23104		3	-0.13253	0.902516
B1AU75	Nasp	7.7e-24	84013.5	MOUSE	Nuclear autoantigenic sperm protein	-0.073166	-0.0341878	-0.101573		-0.0366158	-0.250578	-0.0369834		3	-0.0696423	1.45316		3	-0.108059	0.871797
Q80U93	Nup214	1.2e-22	212980	MOUSE	Nuclear pore complex protein Nup214	-0.13013	-0.0629176	-0.0360683		-0.0416485	-0.0905949	0.0688985		3	-0.076372	1.25157		3	-0.021115	0.457022
Q2KN98	Specc1l	8.9e-23	124489	MOUSE	Cytospin-A	0.143085	0.127788	0.158863		0.31368	0.461293	0.220642		3	0.143245	2.71006		3	0.331872	1.67991
P31230	Aimp1	1.9e-16	33997.6	MOUSE	Aminoacyl tRNA synthase complex-interacting multifunctional protein 1	-0.0117097	-0.180497	-0.0228317		0.0453524	0.0483655	0.0532772		3	-0.0716795	0.797226		3	0.0489984	2.95581
Q6A078	Cep290	9.4e-19	289079	MOUSE	Centrosomal protein of 290 kDa	-0.288741	-0.230055	0.0324383		-0.45506	-0.680036	-0.0649151		3	-0.162119	0.916631		3	-0.400004	1.1081
P28741	Kif3a	1.2e-19	80170.6	MOUSE	Kinesin-like protein KIF3A	0.0364664	0.470941	0.164091		0.0675522	-0.0309822	0.160561		3	0.223833	0.949458		3	0.0657102	0.748704
Q6PDM1	Msl1	1.7e-17	67320.3	MOUSE	Male-specific lethal 1 homolog	-0.0631755	-0.762411	0.0355581		0.205857				3	-0.263343	0.694195		1	0.205857	#DIV/0!
Q9Z2R9	Eif2ak1	2e-08	69702.6	MOUSE	Eukaryotic translation initiation factor 2-alpha kinase 1	-0.760382		-0.475942		-0.892384		-3.05026		2	-0.618162	1.14278		2	-1.97132	0.797502
E9Q6R7	Utrn	7.8e-21	392709	MOUSE	Protein Utrn	0.0412863	0.100452	0.120261		0.00448936	-0.0888692	-0.034153		3	0.087333	1.47815		3	-0.039511	0.8508
P11531	Dmd	3.8e-09	425835	MOUSE	Dystrophin		-0.0992216			0.147748	-0.0226325			1	-0.0992216	#DIV/0!		2	0.0625579	0.525225
Q69ZN7	Myof	7.1e-26	233326	MOUSE	Myoferlin	0.0955752	-0.110459	0.101236		0.218265	0.259923	0.113845		3	0.028784	0.444016		3	0.197344	1.64581
Q3U3U6	Clpb	2.3e-12	76008.4	MOUSE	Putative uncharacterized protein	0.47136	-0.0124975	0.0776799		0.00116714	0.029913	0.142944		3	0.178847	0.754761		3	0.0580079	0.806818
Q9ESD7	Dysf	3.9e-14	237913	MOUSE	Dysferlin	0.8295		-1.71183		0.696144	1.97997	0.990667		2	-0.441166	0.404912		3	1.22226	1.35741
Q91ZX7	Lrp1	1.2e-32	504747	MOUSE	Prolow-density lipoprotein receptor-related protein 1	0.07847	0.105911	0.251283		0.303501	0.338391	0.246137		3	0.145221	1.24577		3	0.29601	2.38969
Q6ZWQ0	Syne2	4.5e-23	782731	MOUSE	Nesprin-2	0.0605301	0.150794	0.115908		-0.101239	-0.135453	-0.2453		3	0.109077	1.5732		3	-0.160664	1.48151
Q99PL5	Rrbp1	3.1e-21	172880	MOUSE	Ribosome-binding protein 1	0.0690491	0.0825153	0.0722169		0.0417499	-0.00498736	0.0644286		3	0.0745938	2.83025		3	0.0337304	0.919697
Q6ZWR6	Syne1	4.1e-18	1.00993e+06	MOUSE	Nesprin-1	-0.0596636	0.0786872	0.127201		0.121082	-0.302312	0.100235		3	0.0487416	0.62366		3	-0.0269985	0.36514
E9PWG6	Ncapg	1.6e-26	112870	MOUSE	Protein Ncapg	0.381478	-0.0574049	-0.0153322		-0.0680579	0.00105263	0.0243299		3	0.102914	0.570005		3	-0.0142251	0.482053
A6H5U5	Lrrfip1	1.1e-17	75104.4	MOUSE	Lrrfip1 protein	0.0375044	-0.250488	-0.0738959		-0.524481	-0.329361	0.0177658		3	-0.0956265	0.730215		3	-0.278692	0.956825
Q3UQN2	Fcho2	1.8e-15	88735	MOUSE	FCH domain only protein 2	-0.264428	0.14919	0.153488		0.485142	0.22594			3	0.0127499	0.330178		2	0.355541	0.953641
P24604	Tec	1.5e-15	73426.9	MOUSE	Tyrosine-protein kinase Tec	-0.155975		0.769732		0.371672		-0.096164		2	0.306878	0.50357		2	0.137754	0.48071
Q9JKF1	Iqgap1	2.8e-26	188744	MOUSE	Ras GTPase-activating-like protein IQGAP1	-0.00510288	0.222921	0.095348		0.15567	0.187507	0.0221197		3	0.104389	0.895451		3	0.121766	1.16073
Q3UQ44	Iqgap2	1.6e-11	180529	MOUSE	Ras GTPase-activating-like protein IQGAP2	-0.365345	-1.18852	0.0622102			-0.0615914	-1.90346		3	-0.497219	0.812133		2	-0.982527	0.620325
P19096	Fasn	3.2e-25	272431	MOUSE	Fatty acid synthase	-0.182257	-0.128481	-0.0512447		-0.295397	-0.275572	-0.160994		3	-0.120661	1.36355		3	-0.243988	1.85026
E9Q7G0	Numa1	1.9e-18	235632	MOUSE	Protein Numa1	-0.0204843	-0.0868601	0.0115694		-0.0344163	-0.0224892	0.0858203		3	-0.031925	0.714969		3	0.00963824	0.384803
O35071	Kif1c	3.4e-28	122435	MOUSE	Kinesin-like protein KIF1C	-0.515134	0.0985998	0.211851		-0.254257	-0.0658289	0.262439		3	-0.0682278	0.402807		3	-0.0192158	0.341818
Q6PHN1	Ccdc57	1.1e-08	116195	MOUSE	Coiled-coil domain-containing protein 57			0.663716		-0.117682	0.121622			1	0.663716	#DIV/0!		2	0.00196994	0.305606
F8VQC7	Ktn1	3.9e-22	152545	MOUSE	Kinectin	-0.0490474	-0.125384	-0.0437728		0.0537181	-0.0430884	0.127072		3	-0.0727348	1.25909		3	0.0459007	0.647881
Q8VD75	Hip1	2.4e-20	115203	MOUSE	Huntingtin-interacting protein 1	0.0754405	0.127446	0.162297		0.264847	0.262054	0.235101		3	0.121728	1.69473		3	0.254001	3.15762
E9PVX6	Mki67	4.6e-26	350867	MOUSE	Protein Mki67	0.0223178	0.296488	-0.143873		-0.283187	-0.270279	-0.136373		3	0.0583109	0.459526		3	-0.229946	1.70745
Q8CGC7	Eprs	6.2e-28	170081	MOUSE	Bifunctional glutamate/proline--tRNA ligase	0.0229876	0.00335999	0.0267563		0.0890683	0.117599	0.0559091		3	0.0177013	1.17147		3	0.0875254	1.70929
Q8BML9	Qars	1.7e-17	87677.3	MOUSE	Glutaminyl-tRNA synthetase	-0.0531358	0.0207042	0.0786003		0.279446	0.304448	0.236761		3	0.0153896	0.440388		3	0.273552	2.58689
Q8CIV8	Tbce	2.2e-26	59086.3	MOUSE	Tubulin-specific chaperone E	0.245615	0.219251	0.00211922		0.141075	0.195991	0.10839		3	0.155662	1.04308		3	0.148485	1.84813
P98197	Atp11a	2.4e-17	135504	MOUSE	Probable phospholipid-transporting ATPase IH	0.0616869	-0.0582169	-0.184635		0.208389	-0.446818	0.116188		3	-0.0603883	0.615089		3	-0.0407468	0.366194
A2AN08	Ubr4	5.6e-26	572295	MOUSE	E3 ubiquitin-protein ligase UBR4	-0.0466021	-0.028213	-0.0530279		0.00379327	0.0217669	-0.0243927		3	-0.0426143	1.83679		3	0.000389166	0.310017
Q9R1P3	Psmb2	2.6e-14	22906.6	MOUSE	Proteasome subunit beta type-2	0.108053	-0.0790825	0.0361614		0.0684886	0.151767	-2.91285		3	0.0217106	0.438374		3	-0.897531	0.63155
A2ANY6	Mdn1	2.6e-30	630347	MOUSE	Midasin	-0.153861	-0.168469	-0.096222		-0.204324	-0.302408	-0.197653		3	-0.139517	1.91921		3	-0.234795	1.9963
B1AZI6	Thoc2	1.6e-18	182775	MOUSE	THO complex subunit 2	-0.122622	-0.210922	-0.111943		-0.21406	-0.240245	-0.0932182		3	-0.148496	1.6795		3	-0.182507	1.54978
Q6P4T2	Snrnp200	1.6e-22	244549	MOUSE	U5 small nuclear ribonucleoprotein 200 kDa helicase	-0.115238	-0.110931	-0.0563652		-0.17298	-0.0880094	-0.148864		3	-0.0941782	1.71927		3	-0.136618	1.78807
Q7M6Z4	Kif27	3.3e-06	158957	MOUSE	Kinesin-like protein KIF27			0.0977405				0.078349		1	0.0977405	#DIV/0!		1	0.078349	#DIV/0!
Q01320	Top2a	1.8e-22	172792	MOUSE	DNA topoisomerase 2-alpha	0.148795	-0.0171038	0.0588986		0.436558	0.50023	0.524128		3	0.0635299	0.800954		3	0.486972	2.84349
Q64511	Top2b	1.2e-23	181910	MOUSE	DNA topoisomerase 2-beta	0.0355351	-0.0096395	0.0589984		-0.186718	-0.0675375	-0.0606756		3	0.028298	0.83088		3	-0.104977	1.20676
P20152	Vim	6e-27	53688.1	MOUSE	Vimentin	-0.0220732	-0.17671	-0.0378879		0.0727261	0.0873427	-0.0485975		3	-0.0788902	0.903953		3	0.0371571	0.620379
Q32P04	Krt5	1.5e-14	61767.2	MOUSE	Keratin 5	-3.80831	-5.99361	-2.48551		-5.20446	-3.7248	-3.95462		3	-4.09581	1.54456		3	-4.29463	2.24927
P15331	Prph	2.4e-12	54268	MOUSE	Peripherin						1.01333			0	#DIV/0!	#DIV/0!		1	1.01333	#DIV/0!
P31001	Des	8.4e-15	53498.2	MOUSE	Desmin						-1.41032	-0.90643		0	#DIV/0!	#DIV/0!		2	-1.15838	1.1664
P50446	Krt6a	2e-09	59335.6	MOUSE	Keratin, type II cytoskeletal 6A	0.403409	-1.91588	-3.70649		-3.54869	1.61868	-8.75334		3	-1.73966	0.852046		3	-3.56112	0.749143
E9QLY5	Krt81	2.8e-10	52863.4	MOUSE	Keratin, type II cuticular Hb1	-9.91073								1	-9.91073	#DIV/0!		0	#DIV/0!	#DIV/0!
Q9Z2T6	Krt85	2.8e-10	55759.9	MOUSE	Keratin, type II cuticular Hb5	-4.4539					-6.29651			1	-4.4539	#DIV/0!		1	-6.29651	#DIV/0!
Q05B38	Krt6b	8.3e-08	60191.6	MOUSE	Krt6b protein (Fragment)					0.0507196				0	#DIV/0!	#DIV/0!		1	0.0507196	#DIV/0!
Q8BGZ7	Krt75	8.3e-08	59741	MOUSE	Keratin, type II cytoskeletal 75	-1.96301	-3.99445				-3.31587	-4.33111		2	-2.97873	0.980446		2	-3.82349	1.3766
Q8VED5	Krt79	8.3e-08	57552.8	MOUSE	Keratin, type II cytoskeletal 79		-2.06307	-9.36264		-9.77379		-2.50621		2	-5.71285	0.74241		2	-6.14	0.769295
Q3UV17	Krt76	2.6e-09	62845.2	MOUSE	Keratin, type II cytoskeletal 2 oral	-4.94546	-5.16581				-7.41236	-6.94737		2	-5.05563	2.15891		2	-7.17986	1.987
Q148Q7	4732456N10Rik	3.7e-08	58240.8	MOUSE	Uncharacterized protein			-0.0965618			-0.277652			1	-0.0965618	#DIV/0!		1	-0.277652	#DIV/0!
P46660	Ina	8.4e-15	55742.3	MOUSE	Alpha-internexin					-0.15118				0	#DIV/0!	#DIV/0!		1	-0.15118	#DIV/0!
Q99M73	Krt84	1.6e-07	64983.5	MOUSE	Keratin, type II cuticular Hb4			-1.48801						1	-1.48801	#DIV/0!		0	#DIV/0!	#DIV/0!
P07744	Krt4	1.6e-07	56283.8	MOUSE	Keratin, type II cytoskeletal 4					-6.75515				0	#DIV/0!	#DIV/0!		1	-6.75515	#DIV/0!
Q0VDM9	Krt78	1.6e-07	54765.1	MOUSE	Krt78 protein (Fragment)					-8.89066				0	#DIV/0!	#DIV/0!		1	-8.89066	#DIV/0!
Q4JG03	Huwe1	3.8e-22	482750	MOUSE	Mcl-1 ubiquitin ligase	-0.186157	-0.142697	-0.184719		-0.294856	-0.295231	-0.213148		3	-0.171191	2.46467		3	-0.267745	2.2909
Q99PV0	Prpf8	2.5e-22	273619	MOUSE	Pre-mRNA-processing-splicing factor 8	-0.0929429	-0.13666	0.022628		-0.129756	-0.135377	-0.0710926		3	-0.0689917	0.848256		3	-0.112075	1.79546
P11087	Col1a1	4.2e-24	138034	MOUSE	Collagen alpha-1(I) chain	0.205215	0.164221	0.0808575		-1.15474	-0.886682	-0.884925		3	0.150098	1.56387		3	-0.975449	2.37983
Q3U962	Col5a2	3.3e-24	145020	MOUSE	Collagen alpha-2(V) chain	-0.0176038	0.111905	0.0784172		-0.739171	-0.540784	-0.432141		3	0.0575729	0.859779		3	-0.570698	1.92227
O88207	Col5a1	6.6e-23	183678	MOUSE	Collagen alpha-1(V) chain	0.0676617	0.038587	0.0394805		-0.447682	-0.328687	-0.445663		3	0.0485764	1.73853		3	-0.407344	2.33746
P28481	Col2a1	6.6e-14	141975	MOUSE	Collagen alpha-1(II) chain			-0.18757		-2.50752		-2.18277		1	-0.18757	#DIV/0!		2	-2.34514	1.6575
Q7TPR4	Actn1	5.9e-47	103069	MOUSE	Alpha-actinin-1	0.132964	0.181657	0.223384		0.215139	0.217957	0.255251		3	0.179335	1.98771		3	0.229449	2.80151
P57780	Actn4	2e-25	104978	MOUSE	Alpha-actinin-4	0.030776	0.0367223	0.138655		0.175477	0.240348	0.255361		3	0.0687178	1.02534		3	0.223729	2.22945
O88990	Actn3	1.2e-14	103044	MOUSE	Alpha-actinin-3			0.233434						1	0.233434	#DIV/0!		0	#DIV/0!	#DIV/0!
Q9D2Q2	Trmt44	4.5e-14	79836.4	MOUSE	Probable tRNA (uracil-O(2)-)-methyltransferase		-0.113472			0.112688				1	-0.113472	#DIV/0!		1	0.112688	#DIV/0!
Q5SXR6	Cltc	4.3e-21	191988	MOUSE	Clathrin heavy chain 1	0.0490989	-0.0238336	0.0626823		0.0816874	0.0253804	0.132736		3	0.0293159	0.711005		3	0.0799345	1.2103
Q64727	Vcl	3.3e-23	116718	MOUSE	Vinculin	0.0915673	0.127695	0.119624		-0.174085	-0.102103	0.0171863		3	0.112962	2.33428		3	-0.0863339	0.88317
Q3TEB0	Pspc1	6.6e-15	42998	MOUSE	Putative uncharacterized protein	-0.253516	0.351751	-0.447119		-0.511803	-0.600315	-0.382582		3	-0.116294	0.470703		3	-0.498233	2.10453
Q3UHQ5	Gcn1l1	2.6e-25	292994	MOUSE	Putative uncharacterized protein	0.0409695	-0.0478462	0.0122772		0.106969	0.16442	0.0105221		3	0.00180017	0.32266		3	0.0939705	1.06695
Q6YIY0	Gm3168	4e-12	60348.2	MOUSE	Gag protein					1.17915				0	#DIV/0!	#DIV/0!		1	1.17915	#DIV/0!
P70355	Mela	4e-12	193969	MOUSE	Gag-Pol polyprotein	-0.000647925					-0.297446	-0.374408		1	-0.000647925	#DIV/0!		2	-0.335927	1.44004
A2AU91	Trp53bp1	3.1e-23	212737	MOUSE	Protein Trp53bp1	1.04363	0.211388	-0.0163814		-0.262484	0.542919	-0.00802354		3	0.412879	0.784512		3	0.0908038	0.432258
P70399	Tp53bp1	3.1e-23	211341	MOUSE	Tumor suppressor p53-binding protein 1	0.15506	0.017048			-0.0524427	-0.214764			2	0.0860539	0.667272		2	-0.133603	0.760039
P48725	Pcnt	2.8e-22	329468	MOUSE	Pericentrin	0.027464	-0.00195077	-0.0100376		-0.366541	-0.341171	-0.148837		3	0.00515854	0.458972		3	-0.285517	1.57387
P08003	Pdia4	3e-24	71983	MOUSE	Protein disulfide-isomerase A4	0.0592419	0.037955	0.182926		0.255811	0.252629	0.122962		3	0.0933742	1.05847		3	0.210467	1.69231
Q8K3H0	Appl1	1.6e-19	79328.8	MOUSE	DCC-interacting protein 13-alpha	0.215893	0.510273	0.0161926		-0.103947	0.205525	-0.228223		3	0.247453	0.945438		3	-0.0422153	0.412014
Q922J3	Clip1	3e-25	155815	MOUSE	CAP-Gly domain-containing linker protein 1	-0.142533	-0.166521	-0.0523739		0.00449616	-0.0435742	0.0407361		3	-0.120476	1.43142		3	0.00055271	0.308036
Q3TI62	Cct6a	-1	58003.6	MOUSE	Putative uncharacterized protein	-0.216792	-0.162181	-0.058023		-0.151941	-0.0972053	-0.111581		3	-0.145665	1.35257		3	-0.120243	2.04422
Q9Z0H8	Clip2	1.4e-15	115911	MOUSE	CAP-Gly domain-containing linker protein 2	-0.140535	0.406921	0.199707		0.0416102	0.436945	0.19146		3	0.155365	0.664579		3	0.223338	1.01732
K3W4R5	Ckap5	9e-19	225638	MOUSE	Cytoskeleton-associated protein 5	-0.135922	-0.151371	-0.124904		-0.118774	-0.000927783	-0.0792399		3	-0.137399	2.80878		3	-0.0663139	1.00973
Q6P5H2	Nes	1.8e-19	207126	MOUSE	Nestin	0.179509	0.234739	0.253562		-0.0272037	-0.159923	0.30757		3	0.222603	2.30897		3	0.0401475	0.397927
Q9CU62	Smc1a	1e-30	143236	MOUSE	Structural maintenance of chromosomes protein 1A	-0.0936452	-0.0927296	0.0265019		-0.207107	-0.130668	-0.0739986		3	-0.053291	0.804985		3	-0.137258	1.45174
E9QAS5	Chd4	8.7e-22	218636	MOUSE	Chromodomain-helicase-DNA-binding protein 4	0.0713332	0.285434	-0.123243		-0.0519817	-0.0698099	-0.129584		3	0.0778414	0.539608		3	-0.0837919	1.45426
B1AR17	Chd3	1.1e-17	232748	MOUSE	Protein Chd3	-0.115847	-0.00300159	-0.0695802		-0.79465	-0.242246	-0.155648		3	-0.0628095	1.01063		3	-0.397514	1.03294
O08788	Dctn1	7.7e-25	141677	MOUSE	Dynactin subunit 1	0.104033	0.059338	0.125808		0.282676	0.258586	0.278708		3	0.096393	1.71204		3	0.273323	3.42971
Q921C5	Bicd2	6.3e-17	93391.6	MOUSE	Protein bicaudal D homolog 2	-0.0134678	0.0325385	-0.0392108		-0.101865	0.143844	-0.108802		3	-0.00671337	0.409286		3	-0.0222745	0.390543
P63037	Dnaja1	3e-19	44868.6	MOUSE	DnaJ homolog subfamily A member 1	-0.204076	-0.265731	-0.0670591		-0.204675	-0.214067	-0.198044		3	-0.178955	1.3331		3	-0.205596	3.59283
B2RQC6	Cad	5.6e-25	243241	MOUSE	Carbamoyl-phosphate synthetase 2, aspartate transcarbamylase, and dihydroorotase	-0.179388	-0.220992	-0.103099		-0.216863	-0.144831	-0.160739		3	-0.167826	1.70115		3	-0.174144	2.11416
P70451	Fer	5.8e-13	94579.6	MOUSE	Tyrosine-protein kinase Fer	-0.189359	0.19329	0.245486		-0.0721674	0.0365046	0.119094		3	0.083139	0.518661		3	0.0278103	0.477949
E9Q555	Rnf213	7.9e-26	584505	MOUSE	E3 ubiquitin-protein ligase RNF213	0.109096	0.135975	0.28802		0.447014	0.521173	0.310653		3	0.177697	1.36749		3	0.42628	1.99393
Q01853	Vcp	1.3e-25	89322.6	MOUSE	Transitional endoplasmic reticulum ATPase	0.00899352	-0.0490475	-0.00675451		0.0499255	0.00191915	0.116678		3	-0.0156028	0.6355		3	0.0561741	0.932868
Q8C1F4	Csgalnact2	7.4e-08	62530.7	MOUSE	Chondroitin sulfate N-acetylgalactosaminyltransferase 2							-0.052565		0	#DIV/0!	#DIV/0!		1	-0.052565	#DIV/0!
E9QKK1	Cenpe	1.3e-18	286216	MOUSE	Centromere-associated protein E	-0.233409	-0.304187	-0.19697		-0.0211077	-0.0530318	0.175663		3	-0.244855	2.09351		3	0.0338412	0.466829
Q9CZU3	Skiv2l2	1.1e-22	117638	MOUSE	Superkiller viralicidic activity 2-like 2	-0.0961652	-0.0974014	-0.0273691		0.00844237	-0.0767803	-0.0297534		3	-0.0736453	1.3657		3	-0.0326971	0.801588
Q6NV83	U2surp	6.7e-20	118262	MOUSE	U2 snRNP-associated SURP motif-containing protein	-0.00843754	-0.104561	-0.0245596		-0.0895127	-0.0796641	0.0440203		3	-0.0458527	0.88133		3	-0.0417188	0.663575
Q3TW36	Skiv2l	3e-20	137556	MOUSE	Putative uncharacterized protein	0.0820626	0.368795	0.0207891		-0.0813413	-0.145338	0.0631783		3	0.157215	0.853328		3	-0.0545004	0.628867
P62880	Gnb2	1.4e-21	37331.4	MOUSE	Guanine nucleotide-binding protein G(I)/G(S)/G(T) subunit beta-2	-0.131544	-0.110309	0.0988163		0.458786	-0.0160722	0.0890622		3	-0.0476789	0.535294		3	0.177259	0.765168
P29387	Gnb4	2.4e-20	37379.4	MOUSE	Guanine nucleotide-binding protein subunit beta-4	0.1919	-0.0258014	-0.0283957		0.0597069	0.201725	0.374351		3	0.045901	0.527428		3	0.211928	1.13911
Q91XQ0	Dnahc8	2.1e-08	541243	MOUSE	Dynein heavy chain 8, axonemal			3.8317						1	3.8317	#DIV/0!		0	#DIV/0!	#DIV/0!
P60710	Actb	4.3e-25	41737.1	MOUSE	Actin, cytoplasmic 1	-0.492636	-0.23825	-0.144018		-1.40375	-1.93414	-1.03047		3	-0.291635	1.27032		3	-1.45612	1.81075
P63260	Actg1	4.3e-25	41793.2	MOUSE	Actin, cytoplasmic 2	-0.241211	0.412093	0.237602		-0.0868371	-0.881479	0.0583112		3	0.136161	0.554541		3	-0.303335	0.690244
P68134	Acta1	1.9e-20	42051.4	MOUSE	Actin, alpha skeletal muscle			-6.36844						1	-6.36844	#DIV/0!		0	#DIV/0!	#DIV/0!
P63268	Actg2	1.9e-20	41877.3	MOUSE	Actin, gamma-enteric smooth muscle						1.07197			0	#DIV/0!	#DIV/0!		1	1.07197	#DIV/0!
Q8BFZ3	Actbl2	2.4e-17	42004.6	MOUSE	Beta-actin-like protein 2			0.0610823		-0.0487298		-0.0440573		1	0.0610823	#DIV/0!		2	-0.0463936	1.79545
P58871	Tnks1bp1	1.8e-24	181826	MOUSE	182 kDa tankyrase-1-binding protein	0.0438416	0.510663	-0.0250476		-0.11588	-0.0945209	-0.092121		3	0.176486	0.69432		3	-0.100841	2.55586
Q3THB3	Hnrnpm	2.7e-26	73741.9	MOUSE	Putative uncharacterized protein	0.00504158	-0.284233	-0.0474489		-0.255753	-0.138729	-0.0769126		3	-0.10888	0.762373		3	-0.157132	1.32028
Q8C4I7	Fbxw9	1e-14	25085.8	MOUSE	Putative uncharacterized protein			-0.286456		0.41329				1	-0.286456	#DIV/0!		1	0.41329	#DIV/0!
Q3U2G2	Hspa4	1.7e-23	94209.5	MOUSE	Heat shock 70 kDa protein 4	-0.157689	-0.121219	-0.0718893		-0.0186515	-0.0065062	0.00288475		3	-0.116932	1.67416		3	-0.00742432	0.749761
Q61699	Hsph1	3.7e-25	96408.3	MOUSE	Heat shock protein 105 kDa	0.00338282	-0.0959962	0.0662206		-0.0836125	-0.0932055	-0.0235968		3	-0.00879761	0.361814		3	-0.0668049	1.33779
P48722	Hspa4l	1e-25	94382.9	MOUSE	Heat shock 70 kDa protein 4L	-0.0990026	0.0429511	0.130926		0.0803269	0.32358	0.265721		3	0.0249581	0.428746		3	0.223209	1.33169
Q8VHG2	Amot	1.1e-16	120916	MOUSE	Angiomotin	-0.124927	0.276282	-0.133485		-0.140298	0.121039	-3.93912		3	0.00595685	0.31477		3	-1.31946	0.677297
P11499	Hsp90ab1	1.3e-27	83281.9	MOUSE	Heat shock protein HSP 90-beta	-0.164129	-0.177956	-0.206681		-0.364418	-0.342397	-0.220958		3	-0.182922	2.63255		3	-0.309258	1.9962
P07901	Hsp90aa1	2.6e-25	84788.6	MOUSE	Heat shock protein HSP 90-alpha	-0.0828591	-0.110634	-0.0400808		-0.020411	-0.172286	0.0171115		3	-0.0778579	1.50189		3	-0.0585286	0.679334
P08113	Hsp90b1	1.7e-22	92476.5	MOUSE	Endoplasmin	-0.0364527	0.0498174	0.0307726		0.0055027	-0.112701	-0.0609554		3	0.0147124	0.50131		3	-0.0560511	0.91543
Q6A099	Gbf1	1.6e-18	200184	MOUSE	MKIAA0248 protein (Fragment)	0.20807	0.19326	-0.0709177		0.134652	0.156015	-0.0670986		3	0.110137	0.75913		3	0.0745228	0.694169
Q3UPJ8	Trap1	2.9e-17	80237.7	MOUSE	Putative uncharacterized protein	0.0906839	-0.00606897	0.110736		0.393069	0.418698	0.378947		3	0.0651171	0.973246		3	0.396905	3.36749
Q3UT71	A630010A05Rik	1e-12	26489.3	MOUSE	Putative uncharacterized protein (Fragment)					-0.271415				0	#DIV/0!	#DIV/0!		1	-0.271415	#DIV/0!
Q3UD67	Aars	1.8e-36	106880	MOUSE	Putative uncharacterized protein	0.0678397	0.0310924	0.00634891		0.118878	0.199579	0.072036		3	0.0350937	1.02592		3	0.130165	1.43751
P63038	Hspd1	1.7e-41	60956	MOUSE	60 kDa heat shock protein, mitochondrial	-0.221675	-0.232038	-0.137812		0.0142898	-0.103022	0.0124083		3	-0.197175	1.95597		3	-0.0254412	0.538119
Q7TSZ3	Lars	2.4e-23	134194	MOUSE	Leucyl-tRNA synthetase	0.00947596	0.0120605	0.00418381		-0.0576109	-0.0561894	-0.114576		3	0.00857343	1.48176		3	-0.0761255	1.53546
Q3UGY5	Fn1	1.5e-26	262846	MOUSE	Putative uncharacterized protein	-0.604736	-0.346253	-0.162387		-0.150911	-0.0951158	-0.335553		3	-0.371125	1.29405		3	-0.19386	1.23495
Q3THQ5	Stip1	5.1e-21	62501.6	MOUSE	Putative uncharacterized protein	-0.114372	-0.0501106	-0.0394586		0.168033	0.0636475	0.0400513		3	-0.0679806	1.29729		3	0.0905772	1.13136
E9Q6J5	Bod1l	8e-30	327456	MOUSE	Protein Bod1l	-0.0171953	0.256839	0.00602295		-0.252163	-0.0634041	-0.0369385		3	0.0818889	0.64864		3	-0.117502	0.948749
Q08EE0	Bod1	5e-13	18384	MOUSE	2310022M17Rik protein	-2.59838				-0.912001	-1.12259			1	-2.59838	#DIV/0!		2	-1.0173	1.48373
Q61768	Kif5b	1e-25	109552	MOUSE	Kinesin-1 heavy chain	-0.0269852	-0.0336742	-0.0653178		0.0605648	0.0861875	-0.101716		3	-0.0419924	1.45025		3	0.0150119	0.385929
P28738	Kif5c	9.7e-17	109275	MOUSE	Kinesin heavy chain isoform 5C		-0.318719			0.174137				1	-0.318719	#DIV/0!		1	0.174137	#DIV/0!
P33175	Kif5a	1.4e-15	117020	MOUSE	Kinesin heavy chain isoform 5A	-0.156413					-0.00363329			1	-0.156413	#DIV/0!		1	-0.00363329	#DIV/0!
P58252	Eef2	4.1e-20	95314.9	MOUSE	Elongation factor 2	-0.123473	-0.212187	-0.0691235		-0.216799	-0.156994	-0.127435		3	-0.134928	1.37843		3	-0.167076	1.92321
O08810	Eftud2	1.8e-22	109362	MOUSE	116 kDa U5 small nuclear ribonucleoprotein component	-0.0418874	-0.205291	-0.00671944		-0.178523	-0.177425	-0.0414323		3	-0.0846325	0.822861		3	-0.13246	1.29855
Q3U4Z7	Hdlbp	2.5e-19	141744	MOUSE	High density lipoprotein (HDL) binding protein, isoform CRA_d	-0.0927085	-0.0279227	-0.189733		-0.219265	-0.103735	-0.303857		3	-0.103455	1.10024		3	-0.208952	1.46123
P70398	Usp9x	2.1e-27	290714	MOUSE	Probable ubiquitin carboxyl-terminal hydrolase FAF-X	-0.147523	-0.0796268	-0.081264		-0.038774	0.031926	-0.0065922		3	-0.102805	1.65551		3	-0.00448007	0.373239
P13864	Dnmt1	4.7e-23	183190	MOUSE	DNA (cytosine-5)-methyltransferase 1	-0.0661455	-0.0926817	-0.0262819		-0.495679	-0.557319	-0.390966		3	-0.061703	1.36932		3	-0.481321	2.29999
O88738	Birc6	2.6e-22	532175	MOUSE	Baculoviral IAP repeat-containing protein 6	0.0285745	0.103004	-0.0963209		-0.417925	-0.358887	-0.368535		3	0.0117525	0.367274		3	-0.381782	2.94197
P38647	Hspa9	8e-23	73461.9	MOUSE	Stress-70 protein, mitochondrial	-0.209564	-0.389649	-0.0586354		-0.108632	-0.233577	-0.0490026		3	-0.219283	1.12791		3	-0.130404	1.15912
P63017	Hspa8	8.7e-24	70871.6	MOUSE	Heat shock cognate 71 kDa protein	-0.168724	-0.241096	-0.063836		-0.235891	-0.300356	-0.124308		3	-0.157886	1.33808		3	-0.220185	1.59815
P17156	Hspa2	8.7e-24	69642.2	MOUSE	Heat shock-related 70 kDa protein 2			0.416511		0.916532	1.01148	0.699533		1	0.416511	#DIV/0!		3	0.875849	2.26246
P52480	Pkm	2.9e-39	57845.4	MOUSE	Pyruvate kinase isozymes M1/M2	-0.0863625	-0.0823507	0.0765026		-0.131512	-0.0512921	-0.0311116		3	-0.0307368	0.505552		3	-0.0713051	1.13792
P53657	Pklr	3.3e-19	62309.2	MOUSE	Pyruvate kinase isozymes R/L	-0.249659		-0.299166				-0.279442		2	-0.274413	1.54309		1	-0.279442	#DIV/0!
P48678	Lmna	5.1e-22	74238.2	MOUSE	Prelamin-A/C	0.00866122	-0.126132	0.0685959		0.125563	0.169207	0.0933781		3	-0.0162915	0.395869		3	0.129383	1.85931
P14733	Lmnb1	2.7e-20	66786.1	MOUSE	Lamin-B1	-0.0768161	-0.280314	0.0419994		-0.0392759	0.0262217	-0.0609711		3	-0.105043	0.720729		3	-0.0246751	0.651866
P21619	Lmnb2	2.4e-23	67318.6	MOUSE	Lamin-B2	0.181171	0.0333832	0.169456		0.353827	0.262867	0.294587		3	0.128004	1.24318		3	0.30376	2.4195
Q8BL66	Eea1	2.1e-18	160916	MOUSE	Early endosome antigen 1	0.0125533	-0.101198	0.0345461		0.31128	0.178446	0.226596		3	-0.0180327	0.449831		3	0.238774	1.89557
Q62383	Supt6h	2.1e-25	199087	MOUSE	Transcription elongation factor SPT6	0.026871	0.00356676	0.0802692		0.0870643	0.104091	0.153571		3	0.0369023	0.910843		3	0.114909	1.84113
P26041	Msn	3.4e-26	67767.6	MOUSE	Moesin	0.0392092	0.113205	0.0338057		0.157186	0.209131	0.0225796		3	0.0620733	1.16653		3	0.129632	1.13984
P26040	Ezr	6e-19	69407.4	MOUSE	Ezrin	0.0718939	0.101494	0.0896785		0.358832	0.470795	0.29976		3	0.0876887	2.32389		3	0.376463	2.06323
P26043	Rdx	1.5e-17	68543.4	MOUSE	Radixin	-0.0899448	-0.0409724	0.0433282		-0.00899692	-0.000163402	-0.0118812		3	-0.0291963	0.575605		3	-0.00701383	1.03408
Q6PB66	Lrpprc	3.2e-20	156616	MOUSE	Leucine-rich PPR motif-containing protein, mitochondrial	0.0332372	-0.0034294	0.0664486		0.163711	0.0732661	0.084813		3	0.0320854	0.898239		3	0.107263	1.49771
P14873	Map1b	1.4e-32	270257	MOUSE	Microtubule-associated protein 1B	0.189032	0.242616	0.162915		0.0313656	-0.0543214	0.163029		3	0.198188	2.16359		3	0.0466911	0.57103
Q9QYR6	Map1a	1e-22	300142	MOUSE	Microtubule-associated protein 1A	0.353211	0.399768	0.259325		0.523542	0.414725	0.36016		3	0.337435	2.13508		3	0.432809	2.21865
P27546	Map4	2e-18	117430	MOUSE	Microtubule-associated protein 4	-0.03255	0.231294	-0.10141		0.0302111	0.0226632	0.00061627		3	0.0324448	0.40932		3	0.0178302	1.04004
Q3U2W2	Mybbp1a	9e-25	152038	MOUSE	MYB binding protein (P160) 1a, isoform CRA_b	-0.259361	-0.311739	-0.273328		-0.538004	-0.523325	-0.467041		3	-0.281476	2.81237		3	-0.509457	3.04642
E9QLK7	Trrap	6.1e-23	435805	MOUSE	Transformation/transcription domain-associated protein	-0.0236834	0.0142385	0.0926966		0.0605041	0.0231336	0.169678		3	0.0277506	0.599387		3	0.0844387	1.01156
E9PVC5	Eif4g1	6.7e-22	175461	MOUSE	Eukaryotic translation initiation factor 4 gamma 1	-0.191771	-0.153201	-0.159413		-0.306379	-0.35696	-0.211299		3	-0.168129	2.60038		3	-0.291546	1.98334
F8VQJ3	Lamc1	3.3e-29	177189	MOUSE	Laminin subunit gamma-1	-0.235634	-0.442769	-0.185409		-0.357924	-0.483186	-0.459136		3	-0.287937	1.47268		3	-0.433416	2.41173
P23116	Eif3a	3.2e-25	161938	MOUSE	Eukaryotic translation initiation factor 3 subunit A	-0.0277666	-0.147213	-0.107827		-0.300311	-0.309398	-0.233167		3	-0.0942689	1.23883		3	-0.280959	2.4412
Q8BKC5	Ipo5	1.4e-23	123592	MOUSE	Importin-5	-0.144759	-0.257231	0.020344		-0.133824	-0.136952	-0.0205023		3	-0.127216	0.894048		3	-0.0970926	1.19815
Q8BIV3	Ranbp6	5.6e-13	124589	MOUSE	Ran-binding protein 6		-0.523768	-0.219001		-0.800457	-0.667509	-0.622776		2	-0.371384	0.906793		3	-0.696914	2.53679
Q1HL32	Smc3	2.6e-17	141557	MOUSE	Cspg6	-0.126423	-0.163767	-0.0261472		-0.241616	-0.156984	-0.136607		3	-0.105445	1.20698		3	-0.178402	1.81003
F8VPK5	Rock2	1.1e-16	160617	MOUSE	Rho-associated protein kinase 2	-0.0077109	-0.0100417	0.057902		0.10016	0.0795507	0.107266		3	0.0133832	0.516482		3	0.0956589	2.42803
Q08288	Lyar	7.3e-27	43735.9	MOUSE	Cell growth-regulating nucleolar protein	-0.235659	0.211841	-0.209706		-0.32031	-0.373888	-0.414816		3	-0.0778416	0.491348		3	-0.369671	2.56589
E9QM38	Slc12a2	1.1e-14	130669	MOUSE	Solute carrier family 12 member 2	-0.181567	0.00555562	-0.192254		-0.0667273	-0.050248	-0.227624		3	-0.122755	1.00846		3	-0.114866	1.04707
A2ANC6	Ap5s1	6.6e-08	22533.1	MOUSE	Uncharacterized protein			-0.332963				0.239954		1	-0.332963	#DIV/0!		1	0.239954	#DIV/0!
Q9JMH9	Myo18a	1.2e-23	232757	MOUSE	Unconventional myosin-XVIIIa	-0.0953752	-0.106459	-0.0386599		-0.10427	-0.205399	-0.148607		3	-0.0801647	1.50676		3	-0.152759	1.75943
Q6NS46	Pdcd11	8.3e-20	207781	MOUSE	Protein RRP5 homolog	-0.21308	-0.338681	-0.180865		-0.527429	-0.53643	-0.502347		3	-0.244209	1.73594		3	-0.522069	3.71975
P20029	Hspa5	5.9e-21	72422.6	MOUSE	78 kDa glucose-regulated protein	0.00743967	-0.0243019	0.166248		0.251316	0.111881	0.114128		3	0.0497953	0.613352		3	0.159108	1.42775
P16627	Hspa1l	2.8e-18	70637.9	MOUSE	Heat shock 70 kDa protein 1-like			-0.295642						1	-0.295642	#DIV/0!		0	#DIV/0!	#DIV/0!
Q8CG47	Smc4	1.7e-18	146896	MOUSE	Structural maintenance of chromosomes protein 4	-0.00738615	-0.064647	0.0463609		-0.0286473	0.0672265	0.0319301		3	-0.00855742	0.390149		3	0.0235031	0.611252
P27773	Pdia3	4.6e-34	56678.8	MOUSE	Protein disulfide-isomerase A3	0.00572518	-0.0344092	0.147246		0.144259	0.0453126	0.0490171		3	0.0395208	0.562536		3	0.0795297	1.17586
A7YY80	Epb4.1l3	2.4e-21	97598.2	MOUSE	Epb4.1l3 protein	-0.0631324	-0.302863	-0.29312		0.138285	0.059426	-0.442022		3	-0.219705	1.27127		3	-0.0814372	0.457222
Q9WV92	Epb41l3	4.6e-21	103338	MOUSE	Band 4.1-like protein 3	-0.339141	0.294244	-1.6105		-0.19946	-0.142024	-0.99286		3	-0.551798	0.669227		3	-0.444781	0.908952
O70318	Epb41l2	1.5e-22	109940	MOUSE	Band 4.1-like protein 2	0.0317359	0.0508766				-0.301494	-0.19334		2	0.0413063	1.13983		2	-0.247417	1.16434
A2AUK5	Epb4.1l1	1.1e-16	98315.7	MOUSE	Erythrocyte protein band 4.1-like 1, isoform CRA_c	-0.141335	0.110807			-0.0141735	-0.226663			2	-0.0152636	0.335689		2	-0.120418	0.638042
Q9Z2H5	Epb41l1	1.8e-16	98315.7	MOUSE	Band 4.1-like protein 1			0.0190227				0.0454244		1	0.0190227	#DIV/0!		1	0.0454244	#DIV/0!
P48193	Epb41	1.5e-16	95912	MOUSE	Protein 4.1		-0.309746							1	-0.309746	#DIV/0!		0	#DIV/0!	#DIV/0!
E9QQ10	Akap9	4e-17	434143	MOUSE	A-kinase anchor protein 9	0.031669	0.0311596	0.0603398		0.0832717	-0.0475694	0.0300948		3	0.0410561	1.5936		3	0.0219324	0.5072
Q91VW5	Golga4	3.2e-16	257566	MOUSE	Golgin subfamily A member 4	0.105391	-0.444651	0.0929643		0.156097	0.336699	0.283928		3	-0.0820983	0.459002		3	0.258908	1.69564
B1AVH7	Tbc1d2	5.7e-18	104261	MOUSE	TBC1 domain family member 2A	0.157321	0.0474858	0.209986		0.482626	0.111046	0.525293		3	0.138264	1.29298		3	0.372988	1.27928
Q01279	Egfr	5.9e-17	134855	MOUSE	Epidermal growth factor receptor	0.358092	0.316638	0.493924		0.272147	0.0130184	0.191043		3	0.389551	2.03689		3	0.158736	1.06106
Q5DU02	Usp22	4.1e-11	59954.2	MOUSE	Ubiquitin carboxyl-terminal hydrolase 22	-0.328757								1	-0.328757	#DIV/0!		0	#DIV/0!	#DIV/0!
Q62120	Jak2	2.8e-14	130236	MOUSE	Tyrosine-protein kinase JAK2							0.0349824		0	#DIV/0!	#DIV/0!		1	0.0349824	#DIV/0!
Q6PGL7	Fam21	1.3e-28	145312	MOUSE	WASH complex subunit FAM21	0.176525	0.356469	0.0272988		0.325175	0.272552	0.250428		3	0.186764	1.02529		3	0.282718	2.51626
Q8VDN2	Atp1a1	8.2e-24	112983	MOUSE	Sodium/potassium-transporting ATPase subunit alpha-1	-0.0424914	-0.0959127	0.0795169		0.261665	0.258372	0.155904		3	-0.0196291	0.43079		3	0.225314	1.94064
Q3UHK5	Atp1a2	7.3e-18	112218	MOUSE	MCG142115, isoform CRA_c						0.230371			0	#DIV/0!	#DIV/0!		1	0.230371	#DIV/0!
Q9WV27	Atp1a4	7.3e-18	114888	MOUSE	Sodium/potassium-transporting ATPase subunit alpha-4			-0.0401697			-2.53419			1	-0.0401697	#DIV/0!		1	-2.53419	#DIV/0!
Q02053	Uba1	3.5e-24	117810	MOUSE	Ubiquitin-like modifier-activating enzyme 1	-0.0747947	-0.0827355	-0.0141807		0.138917	0.129026	0.123715		3	-0.057237	1.2283		3	0.130553	3.23583
Q99NB9	Sf3b1	6.7e-19	145818	MOUSE	Splicing factor 3B subunit 1	-0.204421	-0.19266	-0.129448		-0.317497	-0.341381	-0.242191		3	-0.175509	2.06696		3	-0.300356	2.31168
Q9QX47	Son	8.4e-24	265654	MOUSE	Protein SON	-0.11756	-0.0235826	-0.133062		-0.41681	-0.417019	-0.304551		3	-0.0914016	1.23605		3	-0.37946	2.31864
Q3TLH4	Prrc2c	5.5e-23	310895	MOUSE	Protein PRRC2C	-0.209774	0.0551402	-0.245797		-0.284152	-0.187627	-0.274929		3	-0.133477	0.831568		3	-0.248903	2.12712
Q7TSC1	Prrc2a	8.8e-18	229204	MOUSE	Protein PRRC2A	-0.18754	-0.122857	-0.0887693		-0.264997	-0.413759	-0.21456		3	-0.133055	1.65496		3	-0.297772	1.72084
E9Q9C3	Mllt4	5.6e-24	207314	MOUSE	Afadin	-0.0359621	0.0150732	-0.0279191		-0.0163282	-0.210776	-0.0319706		3	-0.0162693	0.685696		3	-0.0863582	0.823293
P02469	Lamb1	1.1e-26	197092	MOUSE	Laminin subunit beta-1	-0.191426	-0.305504	-0.141515		0.0157241	-0.0384629	-0.115327		3	-0.212815	1.61733		3	-0.046022	0.75729
Q61292	Lamb2	1.8e-20	196581	MOUSE	Laminin subunit beta-2	0.351096	0.0296423	0.102578		0.281695	0.137118	0.542507		3	0.161106	0.921525		3	0.32044	1.24391
A2RRK3	Slk	2.8e-23	137714	MOUSE	Slk protein	-0.0178424	0.0174083	-0.0655913		0.207073	0.289025	0.111494		3	-0.0220085	0.641362		3	0.202531	1.53331
Q0VGR5	Cdk5rap2	9.1e-17	205932	MOUSE	CDK5 regulatory subunit associated protein 2	0.214486	0.0377983	0.202752		0.145985	0.0327199	0.0393312		3	0.151679	1.23248		3	0.0726786	1.03099
O55098	Stk10	8.7e-22	111907	MOUSE	Serine/threonine-protein kinase 10	0.330972	0.138375	0.00900344		0.40541	0.654465	0.366253		3	0.15945	0.938586		3	0.475376	1.7669
Q8K2C7	Os9	1.8e-17	76108.4	MOUSE	Protein OS-9	0.192311	0.0294846	0.192396		-0.0385408	-0.228733	0.00817896		3	0.138064	1.20051		3	-0.0863649	0.750186
Q6ZQ06	Kiaa1009	2.9e-14	160856	MOUSE	Protein QN1 homolog			-0.00910456			0.110522	0.115697		1	-0.00910456	#DIV/0!		2	0.113109	2.13786
Q52KF3	Spire1	1e-15	68450.9	MOUSE	Protein spire homolog 1	-0.0191746	-1.17961	0.349761		-0.269593	-0.605305	-1.54723		3	-0.283009	0.52169		3	-0.807377	1.07271
Q8K1S6	Spire2	1.9e-12	80210.3	MOUSE	Protein spire homolog 2	-0.191643	-0.16288	-0.516659		-2.01961	-0.195349	-0.115118		3	-0.290394	1.20521		3	-0.776694	0.772043
Q569Z5	Ddx46	5.9e-22	117449	MOUSE	Probable ATP-dependent RNA helicase DDX46	-0.138725	-0.028139	-0.0573303		-0.0609232	-0.15461	-0.0363532		3	-0.0747313	1.11793		3	-0.0839622	1.13935
Q9Z277	Baz1b	2.3e-20	170652	MOUSE	Tyrosine-protein kinase BAZ1B	0.159458	0.033173	-0.111619		0.0394909	0.132306	0.0329269		3	0.027004	0.418439		3	0.0682412	1.07752
Q61687	Atrx	1.9e-26	278589	MOUSE	Transcriptional regulator ATRX	-0.110994	0.253144	-0.0729474		-0.375777	-0.325134	-0.192196		3	0.0230674	0.366411		3	-0.297702	1.79333
P25206	Mcm3	7.5e-34	91547.1	MOUSE	DNA replication licensing factor MCM3	-0.00407019	0.00653757	0.077974		0.110729	0.149375	0.0288466		3	0.0268138	0.691154		3	0.0963167	1.2464
Q3V117	Acly	3.8e-24	120796	MOUSE	ATP-citrate synthase	-0.0226894	-0.0156038	0.0394857		0.0956424	0.118694	0.15141		3	0.000397486	0.307286		3	0.121915	2.06652
Q5SWU9	Acaca	1.3e-20	265259	MOUSE	Acetyl-CoA carboxylase 1	-0.125445	-0.148257	-0.0413352		-0.276601	-0.27107	-0.220293		3	-0.105012	1.37696		3	-0.255988	2.61402
G3X922	Dnajc13	9.8e-21	254443	MOUSE	MCG115602	0.0662905	0.0625866	0.124866		0.184199	0.249862	0.132109		3	0.0845812	1.58137		3	0.188723	1.80862
P97310	Mcm2	4.5e-22	102078	MOUSE	DNA replication licensing factor MCM2	0.0278104	0.224497	0.102281		0.185703	0.290043	0.159594		3	0.118196	1.05705		3	0.21178	1.77428
Q6P5D8	Smchd1	7.4e-21	225650	MOUSE	Structural maintenance of chromosomes flexible hinge domain-containing protein 1	0.1209	-0.138579	-0.101719		-0.232483	-0.351026	-0.191116		3	-0.0397994	0.473666		3	-0.258208	1.78569
Q8C0D5	Eftud1	7e-23	125778	MOUSE	Elongation factor Tu GTP-binding domain-containing protein 1	0.232829	0.30577	0.110983		0.170477	0.345965	0.0734123		3	0.216528	1.50534		3	0.196618	1.1785
E9QN52	Lrrfip2	5.5e-20	47134	MOUSE	Leucine-rich repeat flightless-interacting protein 2	0.0191215	0.3586	0.0362989		0.228196	-0.492924	0.0498586		3	0.138007	0.772444		3	-0.0716233	0.413092
P08775	Polr2a	3.8e-26	217178	MOUSE	DNA-directed RNA polymerase II subunit RPB1	-0.102245	-0.127983	-0.121778		-0.510765	-0.360027	-0.311063		3	-0.117335	2.66355		3	-0.393952	1.94912
E9QNN1	Dhx9	1.5e-23	149691	MOUSE	ATP-dependent RNA helicase A	-0.14778	-0.274375	-0.0317602		-0.162105	-0.140748	-0.0592056		3	-0.151305	1.08776		3	-0.120686	1.51326
B2RSU7	Gcc2	9.1e-18	194559	MOUSE	GRIP and coiled-coil domain containing 2	0.156021	0.251099	0.100765		0.0165664	0.0487058	0.154845		3	0.169295	1.51466		3	0.0733723	0.956363
Q64514	Tpp2	9.2e-23	139880	MOUSE	Tripeptidyl-peptidase 2	-0.0849166	-0.0734305	0.0134414		0.0771288	0.0184745	0.197984		3	-0.0483019	0.885964		3	0.0978625	0.988741
H3BL37	Tcof1	9.5e-27	138557	MOUSE	Treacle protein	0.0767019	0.0867153	-0.202843		-0.217372	-0.0727821	-0.128939		3	-0.0131419	0.345564		3	-0.139698	1.39786
Q01149	Col1a2	8.8e-22	129558	MOUSE	Collagen alpha-2(I) chain	0.0790659	-0.114286	0.0142186		-0.959105	-1.14263	-0.835316		3	-0.00700061	0.340463		3	-0.979019	2.38656
Q8BTI8	Srrm2	2.5e-20	294843	MOUSE	Serine/arginine repetitive matrix protein 2	0.154944	0.559384	-0.124133		-0.125007	-0.150639	-0.0964402		3	0.196732	0.671688		3	-0.124029	2.10908
B2RSU6	Cgnl1	5.7e-17	148170	MOUSE	Cingulin-like 1	-0.0441201	-0.192161	-0.050444		-0.546378	-0.660372	-0.253329		3	-0.0955752	1.03017		3	-0.486693	1.54658
D3YUW7	Cgn	9.5e-18	135745	MOUSE	Cingulin	0.266237	0.308138	0.115246		0.357252	0.568071	0.646066		3	0.229874	1.52854		3	0.523796	1.88495
E9Q3P4	Cenpf	1.1e-18	342475	MOUSE	Protein Cenpf	0.27087	0.245994	0.26432		0.406056	0.404559	0.774336		3	0.260395	3.38914		3	0.528317	1.60061
B9EHJ3	Tjp1	2.1e-17	188853	MOUSE	Tight junction protein ZO-1	-0.0429572	-0.0305783	-0.0130268		-0.080856	-0.223841	0.0820401		3	-0.0288541	1.39869		3	-0.074219	0.61141
Q9Z0U1	Tjp2	5.6e-19	131281	MOUSE	Tight junction protein ZO-2	0.229207	0.172956	-0.0673675		0.0847907	0.0939403	0.102739		3	0.111599	0.763682		3	0.0938232	2.81874
P42932	Cct8	6.9e-20	59556	MOUSE	T-complex protein 1 subunit theta	-0.177907	-0.157777	-0.155617		-0.245888	-0.253094	-0.160005		3	-0.163767	3.02849		3	-0.219662	2.04504
Q8BI84	Mia3	4.5e-27	213677	MOUSE	Melanoma inhibitory activity protein 3	0.250099	0.176047	0.11314		0.365063	0.44004	0.286652		3	0.179762	1.64573		3	0.363918	2.14008
E9QP99	Golga3	1.5e-22	167292	MOUSE	Golgin subfamily A member 3	-0.0135379	0.0800441	0.0996158		0.21861	0.135382	0.16285		3	0.055374	0.896802		3	0.172281	2.00866
P80318	Cct3	6.3e-22	60630.6	MOUSE	T-complex protein 1 subunit gamma	-0.199424	-0.180259	-0.0843725		-0.179005	-0.0846428	-0.140251		3	-0.154685	1.61021		3	-0.134633	1.7103
Q3ULC7	Ddx21	2.9e-22	93595.9	MOUSE	Putative uncharacterized protein	-0.204218	-0.273543	-0.309994		-0.658356	-0.627241	-0.532589		3	-0.262585	2.16519		3	-0.606062	2.71318
Q5SWZ5	Mprip	1.1e-24	257288	MOUSE	Myosin phosphatase Rho-interacting protein	-0.241328	-0.0716277	-0.0589755		-0.0283183	-0.145234	-0.00706659		3	-0.123977	1.07195		3	-0.0602062	0.829654
Q99KW3	Triobp	4.1e-18	223369	MOUSE	TRIO and F-actin-binding protein	0.0029289	0.181651	0.0989638		0.179665	0.292278	0.122948		3	0.0945146	0.981503		3	0.198297	1.54071
Q6P9L6	Kif15	2.1e-30	160122	MOUSE	Kinesin-like protein KIF15	0.216137	0.190326	0.0791487		0.0884328	0.148055	0.122482		3	0.16187	1.51373		3	0.119657	1.99567
Q3U417	Ppfibp1	2.7e-20	108539	MOUSE	Putative uncharacterized protein	0.110901	0.138065	-0.0467613		-0.173513	-0.0354923	0.069732		3	0.0674015	0.741581		3	-0.0464245	0.539443
Q921M3	Sf3b3	4.6e-25	135552	MOUSE	Splicing factor 3B subunit 3	-0.238567	-0.180968	-0.0974698		-0.215655	-0.198273	-0.158043		3	-0.172335	1.58409		3	-0.190657	2.40269
Q6P5E4	Uggt1	3.5e-25	176435	MOUSE	UDP-glucose:glycoprotein glucosyltransferase 1	0.0296235	-0.020568	0.0783617		0.337216	0.292046	0.221763		3	0.029139	0.683067		3	0.283675	2.16327
E9Q4X2	Uggt2	2.1e-14	172768	MOUSE	Protein Uggt2			0.272537		-2.37808	-4.44671	-2.56378		1	0.272537	#DIV/0!		3	-3.12952	1.6798
Q3TKV1	Psmd2	2.3e-21	100204	MOUSE	MCG129789, isoform CRA_b	-0.0842884	0.0151157	0.00337753		-0.038329	-0.15094	-0.0586507		3	-0.0219317	0.555374		3	-0.08264	1.15537
Q91ZW3	Smarca5	1.1e-26	121628	MOUSE	SWI/SNF-related matrix-associated actin-dependent regulator of chromatin subfamily A member 5	-0.0939037	-0.189872	-0.0315745		-0.0578717	-0.0324688	-0.104648		3	-0.105117	1.12532		3	-0.0649962	1.33966
P40630	Tfam	7.9e-14	27987.8	MOUSE	Transcription factor A, mitochondrial	-0.114368	-0.288271	-0.398235		-0.0576057	-0.0168376	-0.0923688		3	-0.266958	1.37711		3	-0.055604	1.20174
A0T1J8	Lmo7	2.9e-24	192562	MOUSE	LIM domain only 7	0.280285	0.22636	0.0496524		-0.257936	-0.0565365	-0.013522		3	0.185432	1.23334		3	-0.109332	0.848021
E9QP49	Ehbp1l1	2.4e-21	184804	MOUSE	EH domain-binding protein 1-like protein 1	-0.165524	-0.0137383	-0.0826896		-0.357199	-0.61626	-0.500835		3	-0.0873174	1.03416		3	-0.491431	1.94945
Q8K298	Anln	7.6e-24	122795	MOUSE	Actin-binding protein anillin	0.0889822	0.173118	-0.260758		-0.0642337	0.0177188	-0.162345		3	0.000447401	0.302065		3	-0.0696198	0.805687
Q9CSH3	Dis3	3e-21	108838	MOUSE	Exosome complex exonuclease RRP44	-0.267578	-0.154091	-0.244259		-0.227968	-0.188416	-0.240261		3	-0.221976	1.93088		3	-0.218882	2.59625
Q07113	Igf2r	1.8e-22	273818	MOUSE	Cation-independent mannose-6-phosphate receptor	0.0961838	-0.0682322	0.140612		0.407186	0.404597	0.182839		3	0.0561877	0.629213		3	0.331541	1.63083
Q8CG48	Smc2	6.9e-22	134240	MOUSE	Structural maintenance of chromosomes protein 2	-0.00215028	0.00554002	0.108931		0.120573	0.262335	0.183796		3	0.0374402	0.692967		3	0.188901	1.65731
O55201	Supt5h	1.3e-19	120665	MOUSE	Transcription elongation factor SPT5	0.064546	0.103789	0.0441221		0.192197	0.20111	0.240068		3	0.0708189	1.55262		3	0.211125	2.61871
Q99104	Myo5a	3.8e-20	215540	MOUSE	Unconventional myosin-Va	-0.0299717	0.0318735	0.10087		0.103097	0.173409	0.0756817		3	0.0342573	0.63795		3	0.117396	1.5504
P21271	Myo5b	8.5e-11	210572	MOUSE	Unconventional myosin-Vb		0.229839							1	0.229839	#DIV/0!		0	#DIV/0!	#DIV/0!
Q60597	Ogdh	1.5e-19	116450	MOUSE	2-oxoglutarate dehydrogenase, mitochondrial	0.0824871	0.0761015	0.185292		0.291013	0.269523	0.252423		3	0.114627	1.37929		3	0.270986	3.0724
B2RXT3	Ogdhl	5.2e-15	114562	MOUSE	Ogdhl protein	1.18426	0.60932	0.33616		1.1422	1.02828	0.948505		3	0.709912	1.28058		3	1.03966	2.83717
Q8R1B4	Eif3c	7.4e-26	105532	MOUSE	Eukaryotic translation initiation factor 3 subunit C	-0.124871	-0.130093	-0.071847		-0.277386	-0.199684	-0.220582		3	-0.108937	1.85458		3	-0.232551	2.30896
Q4VA53	Pds5b	3.3e-25	164420	MOUSE	Sister chromatid cohesion protein PDS5 homolog B	0	0.0990361	0.0771478		-0.0170282	0.0756777	0.00078323		3	0.058728	1.02289		3	0.0198109	0.554655
Q6A026	Pds5a	2.9e-23	150329	MOUSE	Sister chromatid cohesion protein PDS5 homolog A	-0.233688	-0.0312112	3.27149e-05		-0.234094	-0.241323	-0.257882		3	-0.0882887	0.755254		3	-0.244433	3.38265
Q61733	Mrps31	4e-16	43881.2	MOUSE	28S ribosomal protein S31, mitochondrial	0.244249	-0.266	0.00643334		-0.346305	-1.08868	-0.0534389		3	-0.00510591	0.311796		3	-0.496141	0.905498
Q8BTF0	Copa	1.9e-18	138523	MOUSE	Putative uncharacterized protein	0.0396713	0.111135	0.0664671		0.169148	0.195313	0.0502384		3	0.0724246	1.43309		3	0.138233	1.34498
P49718	Mcm5	3.6e-37	82343.6	MOUSE	DNA replication licensing factor MCM5	0.0263572	0.0411562	0.0582126		0.0405086	0.172238	0.105619		3	0.0419087	1.64784		3	0.106122	1.2676
Q8VIJ6	Sfpq	7.1e-24	75442.3	MOUSE	Splicing factor, proline- and glutamine-rich	-0.164141	-0.204913	-0.126257		-0.397846	-0.355865	-0.286365		3	-0.165104	2.03619		3	-0.346692	2.36265
Q3TF40	Nono	3.3e-23	60407.3	MOUSE	Putative uncharacterized protein (Fragment)	-0.186892	-0.272854	-0.081385		-0.221109	-0.21056	-0.12626		3	-0.180377	1.38351		3	-0.185976	1.9019
Q6Y7W8	Gigyf2	1.7e-17	149194	MOUSE	PERQ amino acid-rich with GYF domain-containing protein 2	-0.0272744	0.0156284	-0.244561		-0.31715	-0.297876	-0.149331		3	-0.0854024	0.69887		3	-0.254786	1.69165
Q3U4G8	Coro2a	1.9e-06	59601.9	MOUSE	Coronin	-0.191079		0.0840925						2	-0.0534931	0.417975		0	#DIV/0!	#DIV/0!
B1B0C7	Hspg2	3.3e-17	469027	MOUSE	Basement membrane-specific heparan sulfate proteoglycan core protein	-0.160115	-0.248389	-0.0524658		-0.47324	-0.467531	-0.52161		3	-0.153657	1.24684		3	-0.487461	3.20897
P09405	Ncl	5.4e-22	76723.7	MOUSE	Nucleolin	-0.28597	-0.393875	-0.22303		-0.339346	-0.374682	-0.277295		3	-0.300958	1.87957		3	-0.330441	2.43544
Q8R0Z5	Slc25a28	3.6e-11	39358.2	MOUSE	Mitoferrin-2	-0.255268	-0.488235	-0.105768		-0.327766				3	-0.28309	1.20073		1	-0.327766	#DIV/0!
E9Q512	Trip11	2e-16	226457	MOUSE	Protein Trip11	0.077812	0.183179	0.0341652		0.139885	0.208077	0.189303		3	0.0983855	1.1076		3	0.179088	2.19889
Q921I2	Klhdc4	3.9e-21	64861	MOUSE	Kelch domain-containing protein 4	-0.294286	-0.376855	-0.0932832		-0.319153	-0.174363	-0.206987		3	-0.254808	1.32764		3	-0.233501	1.77594
Q05D44	Eif5b	6.3e-24	137617	MOUSE	Eukaryotic translation initiation factor 5B	-0.0970763	0.0175318	-0.0837488		-0.148175	-0.055508	-0.196176		3	-0.0544311	0.867355		3	-0.133286	1.37663
Q99NH0	Ankrd17	1.7e-20	274215	MOUSE	Ankyrin repeat domain-containing protein 17	-0.270651	-0.176754	-0.238325		-0.428335	-0.636578	-0.206979		3	-0.228577	2.14849		3	-0.423964	1.42041
Q8CIJ3	Eif3b	1.3e-28	108984	MOUSE	Eukaryotic translation initiation factor 3 subunit B	-0.20709	-0.155014	-0.0444907		-0.328039	-0.346161	-0.235072		3	-0.135532	1.27716		3	-0.303091	2.19913
O88840	Fbn1	3.4e-22	418313	MOUSE	Mutant fibrillin-1	-0.055909	0.284993	0.0865777		-0.21325	-0.0193025	0.0438057		3	0.105221	0.700456		3	-0.0629157	0.600848
Q61555	Fbn2	1.9e-09	313822	MOUSE	Fibrillin-2					0.056146				0	#DIV/0!	#DIV/0!		1	0.056146	#DIV/0!
Q3TQL4	Immt	7e-23	75473.2	MOUSE	Putative uncharacterized protein (Fragment)	-0.0244727	-0.252083	0.0422612		0.105348	0.0719901	-0.0409554		3	-0.0780981	0.625998		3	0.0454608	0.685692
P33174	Kif4	1.8e-20	139520	MOUSE	Chromosome-associated kinesin KIF4	-0.0904112	-0.095788	-0.0607983		-0.115572	-0.147991	-0.0727133		3	-0.0823325	2.07024		3	-0.112092	1.74708
Q9CXW3	Cacybp	5.8e-30	26510.4	MOUSE	Calcyclin-binding protein	-0.118948	-0.296367	-0.144793		-0.177046	-0.135976	-0.164848		3	-0.186703	1.41037		3	-0.15929	2.53809
B1AVY7	Kif16b	4.2e-18	150059	MOUSE	Kinesin-like protein KIF16B	0.271915	1.43963	0.0441952		-0.36563	-0.811116	-0.586899		3	0.585247	0.811881		3	-0.587881	1.651
F8WIE5	Hectd1	9.9e-28	289232	MOUSE	E3 ubiquitin-protein ligase HECTD1	-0.117886	-0.211572	-0.0341374		-0.628467	-0.502312	-0.458488		3	-0.121198	1.14952		3	-0.529756	2.34085
Q9R0L6	Pcm1	8e-25	228848	MOUSE	Pericentriolar material 1 protein	0.176105	0.30535	0.161317		-0.157451	-0.391459	0.131403		3	0.214257	1.67072		3	-0.139169	0.643448
Q9EPU0	Upf1	6.8e-22	123968	MOUSE	Regulator of nonsense transcripts 1	-0.103801	-0.0917963	0.0510288		-0.0990393	-0.0882004	-0.100816		3	-0.0481894	0.662781		3	-0.0960185	3.07528
Q8BY87	Usp47	1.1e-19	157457	MOUSE	Ubiquitin carboxyl-terminal hydrolase 47	0.0323222	0.137549	-0.00683814		-0.10191	-0.0513377	-0.159877		3	0.0543443	0.776495		3	-0.104375	1.39998
Q543B9	Prep	1.8e-22	80752.3	MOUSE	Prolyl endopeptidase	-0.0466563	-0.107428	-0.0748331		-0.0657256	-0.0450103	0.0203679		3	-0.0763059	1.61008		3	-0.0301227	0.738192
Q3U3D3	Vars	1.3e-21	140201	MOUSE	Putative uncharacterized protein	-0.0867047	-0.0606371	0.0143401		-0.0462038	0.0221849	0.0675723		3	-0.0443339	0.852608		3	0.0145178	0.453759
Q6PFD9	Nup98	1.4e-22	197242	MOUSE	Nuclear pore complex protein Nup98-Nup96	-0.0425265	-0.189654	-0.0179147		-0.117368	-0.168592	-0.00580235		3	-0.0833651	0.885662		3	-0.0972542	1.045
P17182	Eno1	1.9e-23	47141.2	MOUSE	Alpha-enolase	0.0455327	0.0693347	0.0205638		0.0499183	0.0472247	0.0808348		3	0.0451437	1.37134		3	0.0593259	1.80297
P21550	Eno3	5.5e-19	47025.3	MOUSE	Beta-enolase	-0.496011	0.393651	0.14703		0.731572	0.735111	0.592379		3	0.0148901	0.318611		3	0.686354	2.633
P17183	Eno2	5.5e-19	47297.1	MOUSE	Gamma-enolase	0.355871		0.694017		0.945397		0.618245		2	0.524944	1.00357		2	0.781821	1.18276
Q64737	Gart	3.6e-22	107504	MOUSE	Trifunctional purine biosynthetic protein adenosine-3	-0.104116	-0.192259	0.0353219		-0.0179551	-0.107623	-0.052228		3	-0.0870177	0.796591		3	-0.0592688	1.12101
Q5XG71	Utp20	3.1e-21	317747	MOUSE	Small subunit processome component 20 homolog	-0.262032	-0.403179	-0.210131		-0.767027	-0.712473	-0.58575		3	-0.291781	1.73369		3	-0.688416	2.52081
Q9JKR6	Hyou1	2.1e-19	111182	MOUSE	Hypoxia up-regulated protein 1	0.0158806	-0.0232881	0.0807062		0.128895	0.101387	0.113665		3	0.0244329	0.597768		3	0.114649	2.62149
Q8CJF7	Ahctf1	1.9e-17	247648	MOUSE	Protein ELYS	-0.000585715	-0.0148864	-0.18445		-0.426944	-0.326674	-0.18521		3	-0.0666408	0.725552		3	-0.312943	1.63157
Q1HFZ0	Nsun2	3.6e-26	85452.4	MOUSE	tRNA (cytosine(34)-C(5))-methyltransferase	-0.224398	0.0710228	-0.169622		-0.309584	-0.345792	-0.286441		3	-0.107666	0.748088		3	-0.313939	2.82205
B1AR51	Dnahc9	3.5e-10	512366	MOUSE	Dynein, axonemal, heavy chain 9					-0.0786475				0	#DIV/0!	#DIV/0!		1	-0.0786475	#DIV/0!
Q3TXS7	Psmd1	6.4e-20	105731	MOUSE	26S proteasome non-ATPase regulatory subunit 1	-0.0469296	-0.0761713	0.0306827		-0.0311725	-0.0306119	0.0532448		3	-0.0308061	0.661681		3	-0.00284655	0.333287
Q3TW51	Snd1	2.9e-20	102031	MOUSE	Putative uncharacterized protein	0.0670227	0.057651	0.0791271		-0.0578597	-0.0643546	-0.09073		3	0.0679336	2.38355		3	-0.0709814	2.01175
Q3U0V1	Khsrp	3.1e-24	76776.1	MOUSE	Far upstream element-binding protein 2	-0.140057	-0.065847	-0.0732274		-0.150221	-0.249786	-0.208823		3	-0.0930439	1.5321		3	-0.202944	2.00719
Q3TUE1	Fubp1	5.1e-18	67443.9	MOUSE	Far upstream element-binding protein 1	-0.44804	0.0144061	-0.313211		-0.418189	-0.671708	-0.335098		3	-0.248948	0.975709		3	-0.474998	1.67216
A2AJ72	Fubp3	4.6e-16	61447.8	MOUSE	MCG130458	-0.0126096	0.278499	-0.117618		0.0667091	-0.11352	-0.0390369		3	0.0494238	0.445459		3	-0.028616	0.495462
Q9WTI7	Myo1c	1.6e-22	121945	MOUSE	Unconventional myosin-Ic	0.00886539	-0.0131528	0.0786018		0.0819492	0.0460544	0.100307		3	0.0247715	0.633645		3	0.0761034	1.68678
Q8K1N2	Phldb2	3e-24	141487	MOUSE	Pleckstrin homology-like domain family B member 2	0.0282531	0.210427	-0.131028		-0.147354	0.00879238	0.0701488		3	0.0358839	0.425458		3	-0.0228044	0.421174
Q6ZQ58	Larp1	1.3e-24	121153	MOUSE	La-related protein 1	-0.18496	0.011781	-0.120906		-0.470468	-0.411577	-0.236365		3	-0.0980284	0.934214		3	-0.372803	1.77246
Q3TQS1	Larp1b	4.2e-14	33320.4	MOUSE	Putative uncharacterized protein					-3.33952				0	#DIV/0!	#DIV/0!		1	-3.33952	#DIV/0!
Q1A6V0	Inpp4b	4.2e-14	98454.5	MOUSE	Inositol polyphosphate 4-phosphatase type II alpha short isoform					7.59639				0	#DIV/0!	#DIV/0!		1	7.59639	#DIV/0!
F8VPM7	Erc1	1.2e-21	128332	MOUSE	ELKS/Rab6-interacting/CAST family member 1	0.0140979	-0.0789393	0.0500716		0.0671137	0.0122258	0.00344226		3	-0.00492326	0.342084		3	0.0275939	0.823498
Q3UHT7	Erc2	1.5e-11	113058	MOUSE	Putative uncharacterized protein	0.0886962				-0.27721				1	0.0886962	#DIV/0!		1	-0.27721	#DIV/0!
B2RXS4	Plxnb2	6.1e-20	206232	MOUSE	Plexin-B2	0.121087	0.0932095	0.210474		0.393143	0.424574	0.371446		3	0.14159	1.54433		3	0.396388	3.12194
Q99KI0	Aco2	8.2e-30	85464.2	MOUSE	Aconitate hydratase, mitochondrial	0.00560737	-0.022942	0.13457		0.340197	0.320104	0.33601		3	0.0390784	0.598089		3	0.332103	3.77024
Q3TTX0	Matr3	2.2e-25	94617.1	MOUSE	Putative uncharacterized protein	-0.0566314	-0.0776153	-0.191145		-0.458642	-0.4865	-0.422211		3	-0.108464	1.21519		3	-0.455784	3.07997
P80313	Cct7	7e-36	59652.7	MOUSE	T-complex protein 1 subunit eta	-0.153538	-0.19712	-0.0742399		-0.186024	-0.128991	-0.132527		3	-0.141632	1.53123		3	-0.149181	2.1263
G5E924	Hnrnpl	1.2e-27	66935.6	MOUSE	Heterogeneous nuclear ribonucleoprotein L (Fragment)	0.09713	-0.105219	0.0160072		-0.232932	-0.194631	-0.130481		3	0.0026393	0.315032		3	-0.186015	1.90559
Q5RL55	Abcf1	2.3e-24	94817.1	MOUSE	ATP-binding cassette, sub-family F (GCN20), member 1	-0.00458465	0.147701	-0.178232		-0.0915498	-0.0261932	-0.163419		3	-0.0117053	0.34083		3	-0.0937207	1.14953
Q8K2Z4	Ncapd2	1.1e-24	155666	MOUSE	Condensin complex subunit 1	-0.106588	-0.0604794	-0.0531496		-0.0776961	-0.0236375	-0.00515769		3	-0.0734055	1.61804		3	-0.0354971	0.912824
P37913	Lig1	7.6e-25	102290	MOUSE	DNA ligase 1	0.153388	0.273615	0.189538		0.0242323	0.12657	0.107944		3	0.205514	1.84252		3	0.0862488	1.25437
P80314	Cct2	7.2e-34	57477.7	MOUSE	T-complex protein 1 subunit beta	-0.266898	-0.192215	-0.175846		-0.230422	-0.260921	-0.219075		3	-0.211653	2.06846		3	-0.236806	2.85817
G3X8Y3	Naa15	1.7e-24	101096	MOUSE	N-alpha-acetyltransferase 15, NatA auxiliary subunit	-0.201782	-0.181053	-0.0858876		-0.230556	-0.160266	-0.118649		3	-0.156241	1.61618		3	-0.169824	1.7564
Q9DBB4	Naa16	9.3e-22	101285	MOUSE	N-alpha-acetyltransferase 16, NatA auxiliary subunit	-0.00513418	-0.0202823	-0.0838491		-0.342575	-0.472573	-0.43629		3	-0.0364219	0.869629		3	-0.417146	2.37111
E9QA15	Cald1	7.1e-20	89274.1	MOUSE	Protein Cald1	0.247321	0.528397	0.1651		-0.0113695	-0.0827741	-0.0728218		3	0.313606	1.28341		3	-0.0556551	1.18628
Q80YT7	Pde4dip	9.6e-18	250633	MOUSE	Myomegalin	-0.128863	0.0703018	0.00582584		-0.0463404	0.0575282	-0.31584		3	-0.0175783	0.401893		3	-0.101551	0.640416
Q9EP71	Rai14	4.9e-20	108853	MOUSE	Ankycorbin	-0.0457533	0.104363	0.0780544		0.252269	0.23659	0.162925		3	0.0455546	0.668835		3	0.217261	2.1053
Q8R1A4	Dock7	1.3e-29	241440	MOUSE	Dedicator of cytokinesis protein 7	0.0447975	-0.168202	0.053924		-0.0989321	-0.0137413	-0.0989974		3	-0.0231603	0.409012		3	-0.0705569	1.18377
Q8C147	Dock8	3.1e-18	238980	MOUSE	Dedicator of cytokinesis protein 8	-0.350803	0.190352	-0.848038		-0.845522	-0.019279	-1.15528		3	-0.336163	0.722647		3	-0.673361	1.03288
Q8VDR9	Dock6	9.6e-17	233269	MOUSE	Dedicator of cytokinesis protein 6			-0.125536		-0.26714	0.340959	0.596097		1	-0.125536	#DIV/0!		3	0.223306	0.62425
Q9QYI3	Dnajc7	7.9e-23	56476.3	MOUSE	DnaJ homolog subfamily C member 7	-0.054388	-0.247557	-0.0965008		-0.0973992	-0.200117	-0.166404		3	-0.132815	1.11978		3	-0.15464	1.74286
P26231	Ctnna1	4.7e-29	100107	MOUSE	Catenin alpha-1	-0.127714	-0.0846362	-0.0625296		-0.103496	-0.129363	-0.118858		3	-0.0916265	1.68858		3	-0.117239	2.69045
P54276	Msh6	1.3e-29	151085	MOUSE	DNA mismatch repair protein Msh6	0.208008	0.206661	0.182935		0.366703	0.527114	0.276102		3	0.199201	3.07918		3	0.389973	1.77419
Q8BJ71	Nup93	5.3e-26	93281.9	MOUSE	Nuclear pore complex protein Nup93	-0.0400952	-0.136042	0.0744077		-0.0855386	-0.178302	0.00539307		3	-0.0339099	0.499432		3	-0.0861492	0.910535
Q7TT50	Cdc42bpb	8.2e-26	194754	MOUSE	Serine/threonine-protein kinase MRCK beta	0.0852774	0.107921	-0.00127983		0.248105	0.289721	0.239134		3	0.0639727	1.0122		3	0.258987	2.74459
Q3UU96	Cdc42bpa	7.7e-44	195538	MOUSE	Serine/threonine-protein kinase MRCK alpha	-0.0201766	-0.0963758	0.0445857		0.0831144	-0.0247013	-0.13054		3	-0.0239889	0.511735		3	-0.0240421	0.435171
Q9CW79	Golga1	4.9e-30	87338.4	MOUSE	Golgin subfamily A member 1	0.133025	0.137316	0.00229938		-0.0779201	-0.076527	0.0263981		3	0.0908802	1.05374		3	-0.042683	0.766961
Q80YR7	Clspn	2.2e-20	146716	MOUSE	Claspin	0.814987	0.349802	0.0981823		-0.036423	0.356341	0.472948		3	0.42099	1.03902		3	0.264289	0.942282
Q80UW5	Cdc42bpg	5.1e-12	172148	MOUSE	Serine/threonine-protein kinase MRCK gamma	0.46653		0.127777		1.08677	1.73264	0.767814		2	0.297153	0.782764		3	1.19574	1.58521
Q8BKX6	Smg1	3.9e-21	409773	MOUSE	Serine/threonine-protein kinase SMG1	-0.00632151	0.0747126	0.0805206		-0.0937564	0.0765733	-0.0643332		3	0.0496373	0.961392		3	-0.0271721	0.483672
P14824	Anxa6	2.4e-22	75886	MOUSE	Annexin A6	0.266254	0.476599	0.391726		0.767236	0.856749	0.647472		3	0.378193	1.90102		3	0.757152	2.49827
B7STB7	Anxa1	1.3e-18	38750.6	MOUSE	Annexin	0.0621317	0.201851	0.102156		0.329621	0.30589	0.369962		3	0.122046	1.30559		3	0.335158	2.80978
P97429	Anxa4	1.6e-21	35916.1	MOUSE	Annexin A4	0.18249	0.27982	0.186898		0.486354	0.486619	0.436881		3	0.216402	1.98224		3	0.469951	3.20912
Q3U1S6	Csde1	5.9e-20	88791.3	MOUSE	Putative uncharacterized protein	-0.253173	-0.212696	-0.190277		-0.502403	-0.513174	-0.388999		3	-0.218715	2.45554		3	-0.468192	2.44855
Q60847	Col12a1	1.5e-17	340217	MOUSE	Collagen alpha-1(XII) chain	0.153846	0.10569	0.335065		-0.692503	-0.416856	-0.374152		3	0.1982	1.28005		3	-0.494504	1.71699
Q9D0R2	Tars	4e-21	83356.7	MOUSE	Threonine--tRNA ligase, cytoplasmic	-0.12181	-0.179462	-0.044191		-0.140525	-0.201644	-0.252291		3	-0.115155	1.30567		3	-0.198153	1.89323
P70388	Rad50	7.9e-21	153489	MOUSE	DNA repair protein RAD50	-0.0531792	-0.0495928	-0.02393		0.073208	0.132546	0.0942375		3	-0.042234	1.65351		3	0.0999973	1.84054
P60843	Eif4a1	1.7e-26	46154.4	MOUSE	Eukaryotic initiation factor 4A-I	-0.211939	-0.112762	-0.0765324		-0.386539	-0.308396	-0.358759		3	-0.133745	1.39443		3	-0.351231	2.67645
Q91VC3	Eif4a3	1.5e-18	46840.4	MOUSE	Eukaryotic initiation factor 4A-III	-0.116041	-0.319088	-0.0352439		-0.157238	-0.0915849	-0.178686		3	-0.156791	0.990462		3	-0.142503	1.79341
P10630	Eif4a2	8.8e-23	46402.7	MOUSE	Eukaryotic initiation factor 4A-II	0.302046	0.00548406	0.204597		0.198299	0.246231	0.322017		3	0.170709	1.02316		3	0.255516	2.01562
E9PV04	Gm8994	1.5e-18	46854.5	MOUSE	Protein Gm8994							-3.3559		0	#DIV/0!	#DIV/0!		1	-3.3559	#DIV/0!
Q5EBP9	Trim28	3.9e-23	88847.9	MOUSE	Tripartite motif-containing 28	-0.0172673	0.210902	0.0603652		0.00377575	0.00681784	0.122063		3	0.0846665	0.777839		3	0.0442189	0.72837
E9PWE8	Dpysl3	1.6e-24	73885	MOUSE	Dihydropyrimidinase-related protein 3	-0.0846261	-0.0836937	-0.146061		-0.143468	-0.0766991	-0.118867		3	-0.104794	1.73688		3	-0.113011	1.84628
O08553	Dpysl2	1.6e-24	62278.1	MOUSE	Dihydropyrimidinase-related protein 2	0.172121	0.216814	0.265673		0.400812	0.407106	0.30761		3	0.218203	2.12538		3	0.371843	2.43175
Q3UMF0	Cobll1	1.6e-18	137383	MOUSE	Cordon-bleu protein-like 1	-0.262704	-0.138685	-0.251038		-0.156338	-0.0452593	-0.152104		3	-0.217476	1.80271		3	-0.117901	1.38034
Q920B9	Supt16h	5.1e-21	119826	MOUSE	FACT complex subunit SPT16	-0.0510197	-0.144801	0.0370605		-0.040812	0.0338182	0.00878923		3	-0.0529201	0.678156		3	0.000598481	0.309491
Q3ULL5	Eif2s2	1.1e-19	38092.4	MOUSE	Eif2s2 protein	-0.0326262	0.0426709	-0.224622		-0.245863	-0.137423	-0.317848		3	-0.0715257	0.634894		3	-0.233712	1.63048
Q9ERK4	Cse1l	8.5e-21	110456	MOUSE	Exportin-2	-0.0419571	0.0519017	-0.0252568		-0.0337777	0.0490386	0.208794		3	-0.00510408	0.35847		3	0.074685	0.694427
Q80TT4	Tomm70a	1.8e-25	69532.1	MOUSE	MKIAA0719 protein (Fragment)	-0.116292	-0.359657	0.0100945		-0.0437206	-0.0137335	0.303109		3	-0.155285	0.840585		3	0.081885	0.570778
Q569Z9	Skp2	7.5e-14	47766.7	MOUSE	S-phase kinase-associated protein 2 (P45)		0.168264				0.0295717			1	0.168264	#DIV/0!		1	0.0295717	#DIV/0!
Q5SQB7	Npm1	3.8e-32	32560.3	MOUSE	MCG68069	-0.29632	-0.294242	-0.225201		-0.47629	-0.632583	-0.346494		3	-0.271921	2.43746		3	-0.485122	1.85612
Q8K411	Pitrm1	5.3e-18	117373	MOUSE	Presequence protease, mitochondrial	0.165443	-0.0481763	0.143155		0.467205	0.338562	0.255781		3	0.0868073	0.784047		3	0.35385	1.83994
Q5SNZ0	Ccdc88a	7.5e-17	215920	MOUSE	Girdin	0.00426811	-0.0800273	-0.0221254		-0.0358152	-0.159202	-0.0467954		3	-0.0326282	0.795538		3	-0.0806042	1.05161
O55143	Atp2a2	5.2e-19	114859	MOUSE	Sarcoplasmic/endoplasmic reticulum calcium ATPase 2	-0.407281	-0.696683	-0.167513		-0.530809	-0.325393	-0.466762		3	-0.423826	1.26228		3	-0.440988	2.03588
Q00PI9	Hnrnpul2	4.6e-21	84940.9	MOUSE	Heterogeneous nuclear ribonucleoprotein U-like protein 2	0.0684016	0.0211582	0.0598067		0.101274	0.0428496	0.0609039		3	0.0497888	1.4224		3	0.0683425	1.53513
P80316	Cct5	1e-20	59624.6	MOUSE	T-complex protein 1 subunit epsilon	-0.188798	-0.151115	-0.0112556		-0.198982	-0.215771	-0.11045		3	-0.117056	1.09015		3	-0.175068	1.78113
P80315	Cct4	1.8e-21	58066.9	MOUSE	T-complex protein 1 subunit delta	-0.169516	-0.21565	-0.133084		-0.223629	-0.11863	-0.221167		3	-0.17275	2.0317		3	-0.187809	1.79184
F8VPX1	Usp7	8.9e-26	128475	MOUSE	Ubiquitin carboxyl-terminal hydrolase	-0.155175	-0.188934	-0.00779728		-0.213402	-0.333299	-0.160879		3	-0.117302	1.07208		3	-0.23586	1.66004
Q9ESK9	Rb1cc1	1.4e-18	182352	MOUSE	RB1-inducible coiled-coil protein 1	0.0845448	0.0991314	0.320853		0.306628	0.11681	0.212561		3	0.168177	1.10006		3	0.212	1.51726
Q3UXN3	Cars	9.4e-20	94908.7	MOUSE	Putative uncharacterized protein	-0.0136543	-0.084183	0.00499064		-0.00736682	0.0243272	0.031344		3	-0.0309489	0.729881		3	0.0161015	0.811184
Q8BU30	Iars	1e-17	144272	MOUSE	Isoleucine--tRNA ligase, cytoplasmic	-0.117396	-0.0130238	-0.00464617		0.0234965	0.0332219	-0.00268804		3	-0.045022	0.769156		3	0.0180101	0.929861
Q5DTM8	Rnf20	1.1e-18	113521	MOUSE	E3 ubiquitin-protein ligase BRE1A	-0.0647318	0.0668488	-0.038396		-0.0420722	-0.167668	-6.97915e-05		3	-0.012093	0.402346		3	-0.0699366	0.82498
Q3U319	Rnf40	2.4e-19	113968	MOUSE	E3 ubiquitin-protein ligase BRE1B	-0.148538	0.058155	0.0230533		0.0424054	-0.0199935	0.0450903		3	-0.0224434	0.420895		3	0.0225007	0.698041
Q8K2J4	Ccdc14	4.8e-12	102631	MOUSE	Coiled-coil domain-containing protein 14		-0.591854			-0.248148		-0.138196		1	-0.591854	#DIV/0!		2	-0.193172	1.05425
D3YXK2	Safb	1.5e-23	105104	MOUSE	Scaffold attachment factor B1	-0.109175	-0.0792029	-0.147596		-0.210141	-0.224873	-0.141779		3	-0.111991	1.82615		3	-0.192264	2.06377
Q80YR5	Safb2	1.5e-23	111839	MOUSE	Scaffold attachment factor B2	-0.321693	0.0499813	0.00515653		-0.314608	-0.212056	-0.369186		3	-0.0888519	0.578941		3	-0.298617	1.9398
Q6ZQ38	Cand1	8.9e-19	136333	MOUSE	Cullin-associated NEDD8-dissociated protein 1	-0.0816924	-0.197571	-0.0229299		0.0130428	-0.00818838	-0.00487291		3	-0.100731	1.02553		3	-6.16921e-06	0.301317
Q6ZQ73	Cand2	8.8e-21	135634	MOUSE	Cullin-associated NEDD8-dissociated protein 2	0.261005	0.399382	-0.035024		0.166706	-0.346081	0.0013562		3	0.208454	0.911381		3	-0.0593396	0.436255
O88568	Hnrnpu	1.7e-25	87892.3	MOUSE	Heterogenous nuclear ribonucleoprotein U	-0.0592411	-0.0233502	-0.290517		-0.524221	-0.454167	-0.371694		3	-0.124369	0.86058		3	-0.450027	2.32523
Q8VDM6	Hnrnpul1	1.4e-16	96002.7	MOUSE	Heterogeneous nuclear ribonucleoprotein U-like protein 1	-0.0201706	-0.0295514	-0.0164314		0.062762	-0.182714	0.0940717		3	-0.0220511	1.82507		3	-0.00862673	0.332331
P09103	P4hb	3.8e-20	57059	MOUSE	Protein disulfide-isomerase	-0.0382098	-0.0873774	0.0626052		0.20829	0.135211	0.129308		3	-0.020994	0.467722		3	0.157603	1.903
P11983	Tcp1	1e-22	60449.2	MOUSE	T-complex protein 1 subunit alpha	-0.200071	-0.214927	-0.122641		-0.185159	-0.164945	-0.102421		3	-0.179213	1.91098		3	-0.150842	1.88288
P70335	Rock1	7.3e-17	158172	MOUSE	Rho-associated protein kinase 1	-0.254745	-0.139033	0.024017		-0.116719	-0.106864	0.00603145		3	-0.123254	0.874666		3	-0.0725172	0.98532
Q80TP3	Ubr5	1.3e-20	308355	MOUSE	E3 ubiquitin-protein ligase UBR5	-0.212284	-0.158661	-0.120891		-0.213295	-0.369743	-0.103728		3	-0.163945	1.9001		3	-0.228922	1.3126
P33609	Pola1	9.7e-29	167341	MOUSE	DNA polymerase alpha catalytic subunit	-0.00240451	0.0647624	0.0986005		-0.0595623	-0.108128	-0.0595505		3	0.0536528	0.973862		3	-0.0757468	1.66983
P49025	Cit	1.5e-18	235391	MOUSE	Citron Rho-interacting kinase	-0.15247	-0.16754	-0.0634052		-0.195823	-0.199669	-0.213443		3	-0.127805	1.53036		3	-0.202978	3.45989
Q922R0	Prkx	1.2e-10	40466.9	MOUSE	cAMP-dependent protein kinase catalytic subunit PRKX	-0.037181	-0.457829	0.117256		-0.115453	-0.325919			3	-0.125918	0.568681		2	-0.220686	0.848836
Q9CWJ9	Atic	3.7e-29	64217.9	MOUSE	Bifunctional purine biosynthesis protein PURH	-0.141655	-0.200324	-0.151629		-0.0766451	-0.0200274	-0.223041		3	-0.164536	2.22484		3	-0.106571	0.958334
Q3UJB9	Edc4	1.4e-20	152485	MOUSE	Enhancer of mRNA-decapping protein 4	-0.0936129	-0.00389451	0.110113		0.324755	0.283865	0.184771		3	0.00420178	0.32346		3	0.264464	1.92419
Q3TQX5	Ddx3x	2.3e-22	73102	MOUSE	Putative uncharacterized protein	-0.1643	-0.605667	-0.0836884		-0.841764	-0.546497	-0.359252		3	-0.284552	0.955596		3	-0.582505	1.57259
Q3V0Z8	Ddx5	3.2e-19	76759	MOUSE	Putative uncharacterized protein (Fragment)	-0.197111	-0.29095	-0.11693		-0.456252	-0.328694	-0.303294		3	-0.201664	1.54574		3	-0.362747	2.08099
Q3U741	Ddx17	8.9e-22	72585.4	MOUSE	DEAD (Asp-Glu-Ala-Asp) box polypeptide 17, isoform CRA_a	0.140082	0.178411	0.269682		0.345029	0.266886	0.0769267		3	0.196059	1.74046		3	0.229614	1.29193
Q3U484	Ddx3y	4.1e-18	73385.4	MOUSE	Putative uncharacterized protein	-0.206976	-0.451048	0.127209		0.166133	0.124895	-0.391768		3	-0.176939	0.697021		3	-0.0335799	0.362084
Q3V086	Ddx4	2.7e-14	79284	MOUSE	DEAD box polypeptide 4		-9.00026	0.0410578						2	-4.4796	0.599545		0	#DIV/0!	#DIV/0!
Q5SW19	Cluh	2.1e-22	148070	MOUSE	Clustered mitochondria protein homolog	-0.355486	-0.2444	-0.224281		-0.564415	-0.552006	-0.399067		3	-0.274723	1.97164		3	-0.505162	2.26373
P51125	Cast	3.9e-23	84922.4	MOUSE	Calpastatin	0.20261	0.373567	0.144843		0.414715	0.348288	0.36218		3	0.24034	1.43873		3	0.375061	2.8392
Q3TKT4	Smarca4	6.6e-21	181429	MOUSE	Transcription activator BRG1	-0.121428	-0.125323	-0.086359		-0.250914	-0.161562	-0.139293		3	-0.111036	2.21385		3	-0.183923	1.78635
Q6DIC0	Smarca2	1e-15	180255	MOUSE	Probable global transcription activator SNF2L2	0.160247				0.907528				1	0.160247	#DIV/0!		1	0.907528	#DIV/0!
Q564G1	Tpm1	5.3e-25	32708.9	MOUSE	Tropomyosin 1, alpha	0.11497	0.119277	0.0921965		-0.0946002	-0.147405	0.0593549		3	0.108814	2.52956		3	-0.0608835	0.667786
Q58E70	Tpm3	3.4e-19	29020.9	MOUSE	Tpm3 protein	0.0386082	-0.0251087	0.053692		0.0567484	-0.0871337	-0.751838		3	0.0223971	0.64628		3	-0.260741	0.693596
A2AIM4	Tpm2	2.8e-17	32994.1	MOUSE	Tropomyosin beta chain	0.412024	0.334821	0.247443		0.7398	0.531573	0.496697		3	0.331429	2.00084		3	0.589356	2.09203
Q6IRU2	Tpm4	1.1e-20	28468	MOUSE	Tropomyosin alpha-4 chain	0.218417	0.268636	0.161282		0.389909	0.206991	0.2983		3	0.216111	2.00049		3	0.2984	1.82513
Q2VPA6	Helq	1.5e-15	119099	MOUSE	Helicase POLQ-like	-0.0422129	0.306013			0.0369571	0.504328	0.222244		2	0.1319	0.532194		3	0.25451	0.995827
O35887	Calu	4.3e-27	37064	MOUSE	Calumenin	0.0178824	-0.0237852	0.101764		0.183399	0.163083	-0.0235818		3	0.0319536	0.621603		3	0.107634	0.913886
A2AWA9	Rabgap1	9.5e-20	120799	MOUSE	Rab GTPase-activating protein 1	0.165336	0.155692	0.235445		0.413364	0.290817	0.239		3	0.185491	2.04899		3	0.314394	1.88625
A6H6A9	Rabgap1l	2.1e-13	92404.8	MOUSE	Rab GTPase-activating protein 1-like	0.818481	0.283699	0.0611021		0.0135373	0.318595	0.0948218		3	0.387761	0.945761		3	0.142318	0.887654
Q9Z315	Sart1	5.1e-20	90886.1	MOUSE	U4/U6.U5 tri-snRNP-associated protein 1	0.0378281	0.117366	-0.0610272		-0.190647	-0.195521	-0.104457		3	0.0313889	0.519382		3	-0.163542	1.80711
P48972	Mybl2	1.4e-16	79103.2	MOUSE	Myb-related protein B	0.0870282	0.175125	0.367133		-0.0620701	0.188948	0.238626		3	0.209762	1.1987		3	0.121835	0.794961
Q6A042	2700049A03Rik	1.4e-16	148084	MOUSE	MKIAA0586 protein (Fragment)							0.354395		0	#DIV/0!	#DIV/0!		1	0.354395	#DIV/0!
Q61001	Lama5	3e-24	404058	MOUSE	Laminin subunit alpha-5	-0.290533	-0.516368	-0.253289		-0.0782366	-0.316009	-0.257888		3	-0.353397	1.6015		3	-0.217378	1.33049
Q99P72	Rtn4	1.8e-19	126614	MOUSE	Reticulon-4	-0.14892	0.260071	-0.248693		0.206113	-0.0280727	-0.0851328		3	-0.0458474	0.400067		3	0.0309693	0.419447
Q6P9P6	Kif11	9.9e-25	118028	MOUSE	Kinesin-like protein KIF11	0.00892207	0.00984794	0.120095		0.165089	0.205672	0.397439		3	0.0462884	0.774092		3	0.256067	1.45497
O55029	Copb2	4.4e-22	102450	MOUSE	Coatomer subunit beta'	0.000344324	0.0548601	0.0460315		0.183171	0.255651	0.195435		3	0.0337453	1.03658		3	0.211419	2.25816
O08529	Capn2	4.6e-21	79872.9	MOUSE	Calpain-2 catalytic subunit	0.0514274	-0.00423103	0.0491183		0.141278	0.117629	0.0964719		3	0.0321049	0.959697		3	0.11846	2.23193
P97311	Mcm6	5.5e-18	92867.9	MOUSE	DNA replication licensing factor MCM6	0.0226957	0.220848	0.141706		0.160399	0.223568	0.192584		3	0.128416	1.10929		3	0.192184	2.35241
P62259	Ywhae	2e-24	29174.2	MOUSE	14-3-3 protein epsilon	-0.0842121	-0.0708898	-0.0623887		-0.0800374	-0.168855	-0.0783078		3	-0.0724969	2.42096		3	-0.109067	1.47099
P63101	Ywhaz	4.2e-27	27771.4	MOUSE	14-3-3 protein zeta/delta	0.0414549	-0.0783589	0.0166212		0.0112884	-0.0528948	0.0247495		3	-0.00676093	0.361428		3	-0.00561897	0.378629
P68254	Ywhaq	2.3e-22	27778.5	MOUSE	14-3-3 protein theta	-0.0405077	-0.103712	-0.0182726		-0.06336	0.0219544	-0.0913752		3	-0.0541641	1.07433		3	-0.0442603	0.790998
Q9CQV8	Ywhab	2.8e-24	28086.7	MOUSE	14-3-3 protein beta/alpha	0.0839181	0.129148	0.228018		0.256745	0.240747	0.106132		3	0.147028	1.42884		3	0.201208	1.58509
P68510	Ywhah	5.1e-21	28212	MOUSE	14-3-3 protein eta	-0.00126478	0.0707445	0.0583193		0.156249	0.0751917	0.0929589		3	0.0425997	1.01032		3	0.108133	1.61934
P61982	Ywhag	2.5e-22	28302.8	MOUSE	14-3-3 protein gamma	-0.00292746	0.144553	0.0695909		0.0881658	0.294358	0.194776		3	0.0704054	0.920787		3	0.192433	1.37753
O70456	Sfn	8.3e-13	27706.3	MOUSE	14-3-3 protein sigma	-1.1326	-0.239409	-0.357694		-1.06215	-4.83781	-4.83081		3	-0.576569	1.05605		3	-3.57692	1.28171
P70168	Kpnb1	7.9e-32	97185	MOUSE	Importin subunit beta-1	-0.000209648	-0.111816	-0.059329		0.029102	0.06278	0.0459979		3	-0.0571181	0.961712		3	0.04596	1.6783
Q9D6Z1	Nop56	2.6e-29	64464.9	MOUSE	Nucleolar protein 56	-0.246922	-0.23022	-0.186689		-0.169978	-0.217578	-0.230266		3	-0.221277	2.48687		3	-0.205941	2.40634
Q6A065	Cep170	1.9e-24	175051	MOUSE	Centrosomal protein of 170 kDa	-0.0241331	0.318393	-0.165137		0.164159	0.211814	-0.0129349		3	0.0430408	0.401964		3	0.121013	0.961059
Q80U49	Cep170b	2.4e-17	170822	MOUSE	Centrosomal protein of 170 kDa protein B	0.162015	0.0895301	0.177519		-0.171118	-0.281223	0.625576		3	0.143021	1.76802		3	0.0577448	0.367283
P09411	Pgk1	2.6e-23	44550.9	MOUSE	Phosphoglycerate kinase 1	-0.0171537	-0.0140114	0.0815509		0.0928354	0.0856315	0.141911		3	0.0167953	0.484287		3	0.106793	1.88048
P09041	Pgk2	9.2e-19	44853.4	MOUSE	Phosphoglycerate kinase 2					-3.46468				0	#DIV/0!	#DIV/0!		1	-3.46468	#DIV/0!
Q14DS2	Mroh4	4.4e-08	104493	MOUSE	1700016M24Rik protein					-0.105761	-7.16972			0	#DIV/0!	#DIV/0!		2	-3.63774	0.610294
Q3U1J4	Ddb1	3.6e-19	126854	MOUSE	DNA damage-binding protein 1	-0.282379	-0.334908	-0.095875		-0.514008	-0.531974	-0.226014		3	-0.237721	1.38818		3	-0.423999	1.5973
P97329	Kif20a	6.1e-18	99877.3	MOUSE	Kinesin-like protein KIF20A	-0.154106	-0.0911346	-0.0114563		0.214231	0.269681	0.404575		3	-0.0855656	1.06072		3	0.296163	1.76265
Q8CGK3	Lonp1	2.3e-20	105844	MOUSE	Lon protease homolog, mitochondrial	0.0438757	0.0104175	0.0950685		0.353538	0.429403	0.340329		3	0.0497872	1.04466		3	0.374423	2.5647
Q3UAI4	Sf3b2	1.7e-19	98190.2	MOUSE	Putative uncharacterized protein	-0.173696	-0.251748	-0.120938		-0.399948	-0.420348	-0.362258		3	-0.182128	1.68958		3	-0.394184	3.03198
Q3UID0	Smarcc2	2.5e-26	124678	MOUSE	SWI/SNF complex subunit SMARCC2	0.152838	0.126485	0.194688		0.39472	0.209905	0.0511004		3	0.158004	2.11267		3	0.218575	1.10058
P97496	Smarcc1	3.6e-20	122891	MOUSE	SWI/SNF complex subunit SMARCC1	-0.0857026	-0.230931	-0.102538		-0.267048	-0.225844	-0.1821		3	-0.139724	1.33275		3	-0.224997	2.23379
P46935	Nedd4	4.9e-20	102707	MOUSE	E3 ubiquitin-protein ligase NEDD4	0.0241836	-0.00984527	-0.0919994		-0.487699	-0.499241	-0.39555		3	-0.025887	0.575814		3	-0.46083	2.5994
E9PXB7	Nedd4l	1.7e-15	112221	MOUSE	E3 ubiquitin-protein ligase NEDD4-like	0.016978	0.0956604	-0.124661		-0.152597	-0.267364	-0.116368		3	-0.00400765	0.320536		3	-0.178776	1.5293
D3Z1N4	Pbrm1	4.1e-19	189646	MOUSE	Protein polybromo-1	-0.0538835	-0.103834	0.0231625		-0.353288	-0.370366	-0.161437		3	-0.0448516	0.75874		3	-0.29503	1.62098
Q4U2R1	Herc2	2.3e-27	527461	MOUSE	E3 ubiquitin-protein ligase HERC2	-0.0769939	0.119998	-0.00567073		-0.130008	-0.289683	-0.00844044		3	0.0124443	0.372153		3	-0.14271	0.955076
F2Z4A3	Fat1	3e-16	506270	MOUSE	Protein Fat1	-0.0775932	-0.159564	-0.115749		-0.304562	-0.0973623	-0.381237		3	-0.117636	1.71874		3	-0.261054	1.34069
Q8BMK4	Ckap4	8.3e-19	63692.6	MOUSE	Cytoskeleton-associated protein 4	0.115072	-0.0379824	0.0985367		0.343011	0.46193	0.123207		3	0.0585419	0.755991		3	0.309382	1.35026
Q9R244	Trpc2	8.3e-13	130532	MOUSE	Short transient receptor potential channel 2	-0.433963	-0.304634			-0.0518502	-0.288853			2	-0.369299	1.25824		2	-0.170352	0.713399
Q9D0I9	Rars	5.1e-20	75674.2	MOUSE	Arginine--tRNA ligase, cytoplasmic	-0.0248342	-0.0797335	-0.0648135		0.150554	0.140421	0.128665		3	-0.0564604	1.42646		3	0.13988	2.99183
Q8K4Z5	Sf3a1	5e-18	88545.6	MOUSE	Splicing factor 3A subunit 1	-0.0899391	-0.14904	-0.0876081		-0.176061	-0.147124	-0.0628594		3	-0.108862	1.78994		3	-0.128681	1.50096
E9Q6L0	Clasp1	3.4e-18	162140	MOUSE	CLIP-associating protein 1	-0.184723	-0.132533	-0.122961		-0.2062	-0.327538	-0.215925		3	-0.146739	2.07886		3	-0.249888	1.9315
Q08EB5	Clasp2	2.5e-15	142517	MOUSE	Clasp2 protein	0.0447544	-0.117931	0.0778127		0.0592313	-0.036034	0.0760577		3	0.0015452	0.308944		3	0.033085	0.654446
Q8CGB9	Ide	3.8e-20	117696	MOUSE	Insulin degrading enzyme	-0.0481129	-0.110211	-0.00871807		0.079539	0.0712529	0.077229		3	-0.0556807	0.999731		3	0.076007	3.27845
Q3TIY6	Gdi2	1.5e-30	50608.6	MOUSE	Putative uncharacterized protein	-0.0800771	-0.0574627	0.0775092		0.000956863	0.0168889	0.0490241		3	-0.0200102	0.441539		3	0.0222899	0.893546
P50396	Gdi1	1.1e-19	50522	MOUSE	Rab GDP dissociation inhibitor alpha	0.108217	0.343566	0.239124		0.656018	0.633341	0.60212		3	0.230302	1.41238		3	0.630493	3.51321
A2A432	Cul4b	2.5e-18	110700	MOUSE	Cullin-4B	-0.0882403	-0.194073	-0.0736172		-0.179651	-0.227362	-0.376474		3	-0.118643	1.3522		3	-0.261163	1.62114
Q3TCH7	Cul4a	5e-17	87754.2	MOUSE	Cullin-4A	0.128369	0.0880324	0.161421		0.152292	-0.113818	-0.185347		3	0.125941	1.86589		3	-0.0489576	0.468114
Q3TM68	Parp1	4.6e-19	112697	MOUSE	Putative uncharacterized protein	-0.0981315	-0.135222	-0.00855752		0.152745	0.126851	0.0359487		3	-0.080637	1.08315		3	0.105181	1.31368
Q6PDI5	Ecm29	4.5e-18	203705	MOUSE	Proteasome-associated protein ECM29 homolog	-0.0636744	0.0300011	-0.0334747		-0.214181	-0.057597	-0.15417		3	-0.0223827	0.599799		3	-0.141982	1.34896
Q80Y09	Pdcd6ip	1.6e-20	96312.3	MOUSE	Pdcd6ip protein	-0.0304258	-0.00262587	-0.0117733		0.179194	0.15495	0.162968		3	-0.0149416	0.98028		3	0.165704	3.03458
B8X349	Spag9	4.3e-22	146133	MOUSE	JNK-interacting leucine zipper protein long form	0.0660075	0.144504	-0.0217542		0.151785	0.229019	0.14191		3	0.0629192	0.79539		3	0.174238	1.91935
Q6NV54	Mapk8ip3	6.2e-16	147605	MOUSE	Mitogen-activated protein kinase 8 interacting protein 3			-0.97966		0.0396302	0.197083	-0.388738		1	-0.97966	#DIV/0!		3	-0.050675	0.398242
Q924C1	Xpo5	1.8e-22	136974	MOUSE	Exportin-5	-0.109677	-0.0979372	-0.0389097		-0.0174045	0.105721	-0.0159904		3	-0.0821746	1.49325		3	0.0241088	0.512482
Q3TR40	Thbs1	5.7e-25	129620	MOUSE	Putative uncharacterized protein	-0.25702	-0.140855	-0.225861		-0.982197	-1.05262	-0.888655		3	-0.207912	1.87349		3	-0.97449	2.92695
Q3U8Y7	Psmc3	6.8e-20	47338.8	MOUSE	Putative uncharacterized protein	-0.192444	-0.199703	-0.0871017		-0.123321	-0.0664206	-0.0281836		3	-0.159749	1.61837		3	-0.0726419	1.22405
Q53WR6	Glg1	5.8e-21	133735	MOUSE	E-selectin ligand 1	-0.0485489	-0.385208	-0.0134859		-0.315461	-0.213301	-0.282648		3	-0.149081	0.775552		3	-0.27047	2.21574
Q9CZD3	Gars	1.1e-30	81878.5	MOUSE	Glycine--tRNA ligase	-0.0459046	-0.140603	-0.0164599		0.0136846	0.0192323	-0.0242169		3	-0.0676557	0.973502		3	0.00289996	0.370861
P56480	Atp5b	9.9e-20	56301	MOUSE	ATP synthase subunit beta, mitochondrial	-0.142847	-0.164486	-0.00829068		0.13332	0.0538899	0.050656		3	-0.105208	1.08578		3	0.0792887	1.30437
Q3U4T8	Mcm7	5.6e-20	81211.5	MOUSE	MCG10694, isoform CRA_a	0.0152323	0.0468352	0.108968		0.226254	0.235232	0.106667		3	0.0570118	1.05993		3	0.189385	1.65078
Q0KL02	Trio	2e-23	347864	MOUSE	Triple functional domain protein	-0.166523	-0.102984	0.0447264		-0.113104	-0.115526	-0.153648		3	-0.0749269	0.752244		3	-0.127426	2.2819
A2CG49	Kalrn	1.4e-15	337003	MOUSE	Kalirin		-1.37075	-0.100847						2	-0.735797	0.644694		0	#DIV/0!	#DIV/0!
Q8BHN3	Ganab	6.5e-27	106912	MOUSE	Neutral alpha-glucosidase AB	-0.0063694	0.00159333	0.0926922		0.300669	0.256334	0.213773		3	0.0293054	0.644197		3	0.256925	2.32792
Q8R3N1	Nop14	4.3e-23	98770.3	MOUSE	Nucleolar protein 14	-0.225662	-0.0507691	-0.0990676		-0.606217	-0.547957	-0.353315		3	-0.125166	1.15982		3	-0.502496	1.95117
P29341	Pabpc1	1.4e-17	70671.5	MOUSE	Polyadenylate-binding protein 1	-0.382913	-0.446785	-0.235336		-0.20489	-0.428303	-0.323985		3	-0.355011	1.82788		3	-0.319059	1.71481
Q6PHQ9	Pabpc4	4.5e-18	72243.1	MOUSE	MCG5546, isoform CRA_c	-0.0331652				0.34194		-0.0559129		1	-0.0331652	#DIV/0!		2	0.143014	0.52058
Q9D4E6	Pabpc6	3e-16	71002.1	MOUSE	Protein Pabpc6			-0.0941362						1	-0.0941362	#DIV/0!		0	#DIV/0!	#DIV/0!
P40201	Chd1	2.3e-22	196386	MOUSE	Chromodomain-helicase-DNA-binding protein 1	-0.185134	-0.110604	-0.0283339		-0.233555	-0.25471	-0.227668		3	-0.108024	1.15553		3	-0.238644	3.22856
E9PZM4	Chd2	5.9e-16	210805	MOUSE	Protein Chd2	0.506066	0.682212	0.263233		0.709047	0.491833	0.531065		3	0.483837	1.54043		3	0.577315	2.1825
Q3V3R1	Mthfd1l	1.1e-20	105730	MOUSE	Monofunctional C1-tetrahydrofolate synthase, mitochondrial	-0.0476084	-0.170555	0.0402442		-0.0980414	-0.0258127	0.000626242		3	-0.0593065	0.663217		3	-0.0410759	0.826437
Q61553	Fscn1	1.2e-21	54508.4	MOUSE	Fascin	-0.212075	-0.187721	-0.0606209		-0.111177	-0.0853615	-0.159349		3	-0.153472	1.38602		3	-0.118629	1.79838
O88342	Wdr1	7.8e-30	66407.3	MOUSE	WD repeat-containing protein 1	0.134479	0.260551	0.127298		0.0994525	0.0989755	0.0636848		3	0.174109	1.54841		3	0.0873709	2.04855
P56399	Usp5	1.9e-20	95834.1	MOUSE	Ubiquitin carboxyl-terminal hydrolase 5	0.0274446	0.0882446	0.0569397		0.120069	0.0985372	0.120812		3	0.057543	1.38825		3	0.113139	2.68381
Q9JIX8	Acin1	3.6e-24	150720	MOUSE	Apoptotic chromatin condensation inducer in the nucleus	0.0851466	0.199506	-0.0178881		-0.000917975	-0.0510808	0.0110176		3	0.0889216	0.835092		3	-0.0136604	0.562817
Q99K51	Pls3	9.7e-20	70742.6	MOUSE	Plastin-3	0.221853	0.210607	0.388071		0.353376	0.438462	0.42377		3	0.27351	1.68514		3	0.405203	2.68057
Q3V0K9	Pls1	6.4e-18	70408.2	MOUSE	Plastin-1			0.186314				0.744344		1	0.186314	#DIV/0!		1	0.744344	#DIV/0!
Q9DBR7	Ppp1r12a	5.5e-22	114997	MOUSE	Protein phosphatase 1 regulatory subunit 12A	0.294187	0.130818	-0.021555		-0.058643	-0.452213	0.0662224		3	0.134483	0.856769		3	-0.148211	0.654739
Q8BG95	Ppp1r12b	1.5e-13	109050	MOUSE	Protein phosphatase 1 regulatory subunit 12B	0.188318		0.0708372		0.348716	0.798263	0.225954		2	0.129578	0.868135		3	0.457644	1.22476
P30416	Fkbp4	1.9e-19	51572.8	MOUSE	Peptidyl-prolyl cis-trans isomerase FKBP4	-0.205038	-0.280821	-0.104239		-0.219064	-0.257514	-0.0125298		3	-0.196699	1.51255		3	-0.163036	1.08269
Q6ZQ08	Cnot1	1.4e-21	266810	MOUSE	CCR4-NOT transcription complex subunit 1	-0.17059	-0.157461	-0.062702		-0.172215	-0.16515	-0.189387		3	-0.130251	1.50978		3	-0.175584	3.07685
P14211	Calr	1.4e-28	47994.9	MOUSE	Calreticulin	0.0635478	0.02466	0.176253		0.167995	0.118866	0.227793		3	0.0881538	1.01766		3	0.171552	1.79466
Q8BP47	Nars	3.8e-21	64279.9	MOUSE	Asparagine--tRNA ligase, cytoplasmic	-0.0348223	-0.0102273	0.0219886		-0.0360723	-0.0343739	0.00471572		3	-0.00768698	0.464554		3	-0.0219102	0.917628
G5E870	Trip12	1.4e-19	224130	MOUSE	E3 ubiquitin-protein ligase TRIP12	-0.16608	0.0696237	-0.246881		-0.661436	-0.744996	-0.356769		3	-0.114446	0.755331		3	-0.587734	1.72114
Q00547	Hmmr	1.1e-19	91786.2	MOUSE	Hyaluronan mediated motility receptor	0.154744	0.147948	0.125112		0.524029	0.512408	0.692529		3	0.142601	2.70701		3	0.576322	2.29909
Q3UJA1	Rrp12	1.2e-20	143132	MOUSE	Putative uncharacterized protein	-0.245236	-0.330518	-0.197458		-0.785991	-0.693083	-0.667917		3	-0.257737	1.95767		3	-0.715664	2.90174
Q80WE4	Kif20b	1.8e-17	203516	MOUSE	Kinesin-like protein KIF20B	-0.261416	-0.23624	-0.17824		-0.534092	-0.610624	-0.425006		3	-0.225298	2.23145		3	-0.523241	2.28278
G5E829	Atp2b1	9e-26	134748	MOUSE	MCG13663, isoform CRA_a	0.0252384	0.0177822	0.0539451		0.182357	0.276456	0.134909		3	0.0323219	1.30409		3	0.197907	1.68356
Q32ME1	Atp2b4	9e-26	122296	MOUSE	ATPase, Ca++ transporting, plasma membrane 4							1.29411		0	#DIV/0!	#DIV/0!		1	1.29411	#DIV/0!
Q80V30	Kif23	6.4e-20	108791	MOUSE	Kinesin family member 23	-0.191949	-0.244561	-0.335856		-0.0984596	-0.209479	-0.0592711		3	-0.257455	1.89208		3	-0.122403	1.24916
Q3TVW1	Spg20	4.5e-16	72655.3	MOUSE	Spastic paraplegia 20, spartin (Troyer syndrome) homolog (Human), isoform CRA_b	-0.0731433	0.07341	-0.198156		0.103135	-0.156721	-0.2245		3	-0.065963	0.611653		3	-0.0926952	0.646625
Q922D4	Ppp6r3	1.3e-28	94653.7	MOUSE	Serine/threonine-protein phosphatase 6 regulatory subunit 3	-0.0910621	0.00590043	-0.0679437		-0.109843	-0.167606	-0.235912		3	-0.0510351	0.952668		3	-0.17112	1.67296
Q8K224	Nat10	7.1e-20	115420	MOUSE	N-acetyltransferase 10	-0.057119	-0.110673	-0.149413		-0.0694407	-0.147356	-0.177434		3	-0.105735	1.53404		3	-0.13141	1.56023
E9PYB0	Ahnak2	1.2e-22	182707	MOUSE	Protein Ahnak2 (Fragment)	0.51057	0.489632	0.336902		0.731356	0.602841	0.595443		3	0.445701	2.13229		3	0.643214	2.63146
Q6NWW1	Ube4b	9.5e-21	133317	MOUSE	Ubiquitination factor E4B, UFD2 homolog (S. cerevisiae)	-0.0784238	-0.171445	-0.0287758		-0.292969	-0.219595	-0.172607		3	-0.0928814	1.10664		3	-0.22839	1.94468
Q3UL36	Arglu1	2.2e-10	32887.2	MOUSE	Arginine and glutamate-rich protein 1	-0.155633	-0.245049	-0.00681045		0.231643	-0.0989031	0.271207		3	-0.135831	1.02277		3	0.134649	0.732953
P62196	Psmc5	1.7e-20	45626.4	MOUSE	26S protease regulatory subunit 8	-0.054248	-0.0587842	-0.0178506		0.0579918	0.0843691	0.0686242		3	-0.0436276	1.40895		3	0.0703284	2.23426
P62192	Psmc1	2.9e-20	49184.9	MOUSE	26S protease regulatory subunit 4	-0.170027	0.039549	-0.141924		-0.0574461	-0.0428641	-0.12702		3	-0.0908006	0.822532		3	-0.0757768	1.30063
P54775	Psmc4	1.3e-18	47408.7	MOUSE	26S protease regulatory subunit 6B	-0.0553632	0.0562449	-0.00519487		0.335046	0.107855	0.0407114		3	-0.00143771	0.314924		3	0.161204	0.974729
E9PUR0	Ankhd1	7.3e-21	269679	MOUSE	Protein Maskbp3	0.0171422	2.47418	-0.0132825		-0.386899	-0.403775	0.0521477		3	0.826014	0.675953		3	-0.246175	0.919335
Q60902	Eps15l1	5.8e-23	99309.5	MOUSE	Epidermal growth factor receptor substrate 15-like 1	0.145888	0.0778239	0.165344		0.360204	0.375039	0.318818		3	0.129685	1.70555		3	0.351354	2.94225
P50580	Pa2g4	2.3e-22	43699.2	MOUSE	Proliferation-associated protein 2G4	-0.306898	-0.376273	-0.181453		-0.376385	-0.330416	-0.258569		3	-0.288208	1.73315		3	-0.32179	2.25334
E9PWW9	Rsf1	3.9e-28	160625	MOUSE	Protein Rsf1	-0.0125864	-0.0497523	0.00645365		-0.0765341	-0.0802021	0.0886973		3	-0.0186284	0.725609		3	-0.0226796	0.441702
Q99KK7	Dpp3	3.8e-28	82898.4	MOUSE	Dipeptidyl peptidase 3	0.130072	0.0459265	0.185822		0.334841	0.333779	0.322162		3	0.120607	1.31271		3	0.33026	4.12162
P47962	Rpl5	2.5e-26	34401	MOUSE	60S ribosomal protein L5	-0.237099	-0.303439	-0.0926393		-0.378428	-0.314815	-0.274355		3	-0.211059	1.4144		3	-0.322533	2.36127
Q3TUW9	Ehd1	4.8e-20	60645.4	MOUSE	Putative uncharacterized protein	-0.20774	-0.0671471	-0.130515		0.000941477	-0.0645478	2.31672e-06		3	-0.135134	1.39897		3	-0.0212013	0.6664
Q8BH64	Ehd2	1.2e-19	61175	MOUSE	EH domain-containing protein 2	0.0513033	0.0204063	0.00166321		-0.413005	-0.368432	-0.530854		3	0.0244576	0.933487		3	-0.43743	2.22014
Q1MWP9	Ehd4	1e-30	61813.5	MOUSE	EH-domain containing 4 (Fragment)	0.183108	0.207908	0.141661		0.414544	0.423188	0.307762		3	0.177559	2.23515		3	0.381831	2.33169
Q8R0G9	Nup133	3.3e-20	128621	MOUSE	Nuclear pore complex protein Nup133	0.0333477	-0.0239763	-0.00947721		-0.0666583	-0.117874	0.0146936		3	-3.52847e-05	0.30166		3	-0.056613	0.853693
P68372	Tubb4b	2.8e-21	49831.5	MOUSE	Tubulin beta-4B chain	0.00401786	-0.035808	-0.0553432		0.0442687	0.112447	-0.022043		3	-0.0290445	0.924019		3	0.044891	0.736315
P99024	Tubb5	2.8e-21	49671.3	MOUSE	Tubulin beta-5 chain		1.0005	0.00188352		0.399589	-2.84333	-4.45038		2	0.501191	0.603102		3	-2.29804	0.905771
Q9CWF2	Tubb2b	2.8e-21	49953.5	MOUSE	Tubulin beta-2B chain			0.400126						1	0.400126	#DIV/0!		0	#DIV/0!	#DIV/0!
Q7TMM9	Tubb2a	2.8e-21	49907.4	MOUSE	Tubulin beta-2A chain			2.50862			0.712634	0.0235847		1	2.50862	#DIV/0!		2	0.368109	0.62075
Q3UMM1	Tubb6	4.6e-23	50090.8	MOUSE	Tubulin, beta 6	0.0227571	-0.119742	0.0680798		0.247038	0.167372	0.167733		3	-0.0096351	0.356319		3	0.194047	2.04245
Q9ERD7	Tubb3	2.8e-21	50419.1	MOUSE	Tubulin beta-3 chain	0.261631	0.0641716	0.122456		0.568315	0.476122	-1.17354		3	0.14942	1.2027		3	-0.0430351	0.325
J3QNR5	Tubb4b-ps1	2.8e-21	49786.4	MOUSE	Uncharacterized protein			-0.0517736						1	-0.0517736	#DIV/0!		0	#DIV/0!	#DIV/0!
Q61033	Tmpo	1.6e-22	75168.9	MOUSE	Lamina-associated polypeptide 2, isoforms alpha/zeta	-0.0534902	0.235688	-0.124817		-0.476457	-0.368007	-0.394821		3	0.019127	0.357433		3	-0.413095	2.51039
Q8BH74	Nup107	5.5e-17	106718	MOUSE	Nuclear pore complex protein Nup107	-0.127718	-0.12358	0.047839		-0.0305488	-0.0241484	0.0427403		3	-0.06782	0.742626		3	-0.00398566	0.356249
Q91YR7	Prpf6	4.4e-21	106723	MOUSE	Pre-mRNA-processing factor 6	0.0631982	0.0517165	0.108525		0.149758	0.095871	0.0773594		3	0.07448	1.60057		3	0.107663	1.71719
A2A654	Bptf	1.7e-24	333231	MOUSE	Protein Bptf	0.0488072	0.0863174	0.0798928		-0.0409417	-0.093482	0.123068		3	0.0716724	1.90078		3	-0.00378514	0.319214
Q3TXT7	Ruvbl2	1.3e-22	51113	MOUSE	RuvB-like protein 2	-0.18484	-0.160799	-0.0460841		-0.0853465	-0.154647	-0.0998498		3	-0.130574	1.33357		3	-0.113281	1.7826
Q3THK7	Gmps	1.4e-18	76724.1	MOUSE	GMP synthase [glutamine-hydrolyzing]	-0.237772	-0.285597	-0.173927		-0.314754	-0.2858	-0.242765		3	-0.232432	2.02636		3	-0.281106	2.5615
E0CYH7	Filip1l	1.2e-18	129846	MOUSE	Filamin A-interacting protein 1-like	-0.226061	-0.0984629	-0.0756931		-0.613158	-0.598325	-0.268717		3	-0.133406	1.28335		3	-0.4934	1.61803
Q8BH65	Dennd6a	7.6e-14	68967.6	MOUSE	Protein DENND6A			-1.24012			0.191591	-0.731769		1	-1.24012	#DIV/0!		2	-0.270089	0.479504
Q6PB44	Ptpn23	2.1e-19	185218	MOUSE	Tyrosine-protein phosphatase non-receptor type 23	0.0827735	0.168598	0.168954		0.502078	0.524966	0.447026		3	0.140109	1.70545		3	0.491357	2.95694
Q9CX34	Sugt1	3.8e-26	38159.2	MOUSE	Suppressor of G2 allele of SKP1 homolog	-0.0391204	0.247042	0.0184785		0.0496709	0.00821963	0.0790704		3	0.0754667	0.620855		3	0.0456536	1.1067
Q60875	Arhgef2	8.7e-26	111975	MOUSE	Rho guanine nucleotide exchange factor 2	0.0783632	0.0357481	0.069899		0.023762	-0.00356883	0.0970676		3	0.0613368	1.67511		3	0.0390869	0.791858
E9PZW8	Myo9b	7e-22	240318	MOUSE	Unconventional myosin-IXb	0.204902	0.391034	0.000599486		-0.0300842	0.484503	0.29331		3	0.198845	0.958902		3	0.249243	0.922911
Q8C170	Myo9a	3.1e-19	292122	MOUSE	Unconventional myosin-IXa	0.809039	0.0398528	-0.0749926		-0.357395	-0.0159451	-0.125704		3	0.257966	0.6471		3	-0.166348	0.920519
Q8K4F5	Abhd11	1.8e-10	33560.9	MOUSE	Alpha/beta hydrolase domain-containing protein 11	-0.0547905		-1.51577						2	-0.78528	0.622513		0	#DIV/0!	#DIV/0!
Q6PR54	Rif1	7e-27	266230	MOUSE	Telomere-associated protein RIF1	0.0295358	0.239975	-0.149368		-0.48633	-0.622424	-0.164618		3	0.0400476	0.422546		3	-0.424457	1.35242
Q60710	Samhd1	4.4e-19	72651	MOUSE	SAM domain and HD domain-containing protein 1	0.0953729	0.186599	0.0971898		0.302192	0.164601	0.177887		3	0.126387	1.58218		3	0.214893	1.70828
Q8BX70	Vps13c	8.4e-16	420092	MOUSE	Vacuolar protein sorting-associated protein 13C	-0.0867965	0.0939815	0.273815		0.405451	0.416398	0.176929		3	0.0936668	0.635262		3	0.332926	1.59497
Q9WTX8	Mad1l1	2.7e-17	83542.1	MOUSE	Mitotic spindle assembly checkpoint protein MAD1	-0.185204	-0.249407	-0.104524		-0.444871	-0.385724	-0.399319		3	-0.179712	1.59924		3	-0.409971	3.02275
Q8R4U7	Luzp1	5.6e-18	119312	MOUSE	Leucine zipper protein 1	-0.0924527	0.0937263	-0.336424		-0.206598	-0.302272	-0.320705		3	-0.111717	0.634151		3	-0.276525	2.09782
Q6KCD5	Nipbl	1.1e-30	315453	MOUSE	Nipped-B-like protein	-0.120051	-0.154642	0.0126865		-0.40172	-0.170619	-0.173975		3	-0.0873354	0.941323		3	-0.248771	1.38233
Q9JMA1	Usp14	3.5e-21	56002.5	MOUSE	Ubiquitin carboxyl-terminal hydrolase 14	-0.12558	-0.0634289	-0.209679		0.00178327	-0.0436396	-0.0394362		3	-0.132896	1.35456		3	-0.0270975	0.994783
Q6ZQG1	Nup205	3.4e-19	233817	MOUSE	MCG21756, isoform CRA_a (Fragment)	-0.0849555	-0.212918	-0.0341957		-0.199677	-0.227688	-0.145959		3	-0.11069	1.06342		3	-0.191108	2.11404
Q6PAC1	Gsn	2.5e-26	80763.2	MOUSE	Gelsolin, isoform CRA_c	0.24038	0.365645	0.340362		0.647799	0.665956	0.446896		3	0.315462	2.14325		3	0.586884	2.15478
Q8C1A5	Thop1	4.1e-18	78026.6	MOUSE	Thimet oligopeptidase	-0.105327	-0.105133	-0.0822929		-0.0832175	0.0264779	0.0691958		3	-0.0975843	2.51691		3	0.00415208	0.330007
Q04750	Top1	1.1e-17	90876.5	MOUSE	DNA topoisomerase 1	-0.301305	-0.406755	-0.172348		-0.194464	-0.0172728	-0.187856		3	-0.293469	1.6071		3	-0.133198	1.12937
Q6ZPJ3	Ube2o	3.8e-21	140835	MOUSE	Ubiquitin-conjugating enzyme E2 O	-0.0577263	-0.108087	0.0738168		-0.30713	-0.253102	-0.0199647		3	-0.0306654	0.50258		3	-0.193399	1.09863
Q548T0	Stxbp2	7.5e-18	66358	MOUSE	Syntaxin binding protein 2, isoform CRA_e	0.1848	-0.101083	0.0966125		0.79707	0.62615	0.94901		3	0.0601099	0.560092		3	0.790743	2.1667
P46460	Nsf	9.5e-22	82614.2	MOUSE	Vesicle-fusing ATPase	0.020943	0.0494123	0.0643209		0.205638	0.26827	0.16307		3	0.044892	1.44493		3	0.212326	1.99819
O54941	Smarce1	6.3e-20	46638.8	MOUSE	SWI/SNF-related matrix-associated actin-dependent regulator of chromatin subfamily E member 1	-0.10366	-0.167387	-0.0606082		-0.0219986	0.0254806	0.0911602		3	-0.110552	1.45289		3	0.0315474	0.659844
E9QLA5	Inf2	9.8e-28	138365	MOUSE	Inverted formin-2	0.0255682	0.177975	-0.000526623		0.151809	0.0835181	0.0286002		3	0.0676722	0.759313		3	0.0879758	1.17949
Q5U4B1	Rfc1	5e-21	126065	MOUSE	Replication factor C subunit 1	0.158488	0.487203	0.123895		0.150549	-0.135783	-0.0717368		3	0.256528	1.105		3	-0.0189903	0.37312
Q8CCV1	Gspt1	2.6e-22	55612.2	MOUSE	Putative uncharacterized protein	-0.0836762	0.0199415	-0.124204		-0.200135	-0.200051	-0.154214		3	-0.0626462	0.851077		3	-0.1848	2.46988
P40142	Tkt	6.4e-22	67631.1	MOUSE	Transketolase	0.0249	0.0934987	0.0720085		0.260008	0.345356	0.230153		3	0.063469	1.35384		3	0.278506	2.12447
Q99MX0	Tktl1	3.8e-10	65245.2	MOUSE	Transketolase-like protein 1						0.0242436			0	#DIV/0!	#DIV/0!		1	0.0242436	#DIV/0!
Q3UL43	Nup155	4.8e-20	150194	MOUSE	Putative uncharacterized protein	-0.153642	-0.153137	0.130908		0.215828	0.158372	0.0976318		3	-0.0586236	0.52343		3	0.157277	1.65764
P46471	Psmc2	1.4e-20	48648.3	MOUSE	26S protease regulatory subunit 7	-0.135634	-0.0669348	-0.121961		-0.0955128	-0.0852047	-0.109908		3	-0.108177	1.74879		3	-0.0968753	2.56671
Q9QUG2	Polk	6.3e-16	96003.7	MOUSE	DNA polymerase kappa	0.0742069	0.250171	0.341659		-0.222475	0.430821	0.52589		3	0.222012	1.2776		3	0.244745	0.69104
Q569Z6	Thrap3	1.9e-19	108179	MOUSE	Thyroid hormone receptor-associated protein 3	0.173784	0.279602	-0.091205		-0.331009	-0.350678	-0.184666		3	0.120727	0.712332		3	-0.288784	1.80485
Q3UDL9	Bclaf1	2.6e-25	103240	MOUSE	Putative uncharacterized protein (Fragment)	0.0744705	0.304365	-0.0812958		-0.247862	-0.0519655	-0.0274343		3	0.0991798	0.629545		3	-0.109087	0.888969
G3X9B1	Heatr1	6.6e-50	242074	MOUSE	HEAT repeat containing 1	-0.354179	-0.451182	-0.20687		-0.500458	-0.500428	-0.552939		3	-0.337411	1.6823		3	-0.517942	3.24434
P07356	Anxa2	2.5e-18	38676.5	MOUSE	Annexin A2	-0.0251628	-0.08648	0.0344811		0.0147487	0.0637299	0.126476		3	-0.0257206	0.570193		3	0.068318	1.07321
Q7TNL5	Ppp2r5d	2.9e-16	69123.3	MOUSE	Protein phosphatase 2, regulatory subunit B (B56), delta isoform, isoform CRA_a	-0.00629171	-0.119696	-0.11744		0.0850338	0.0688743	-0.219041		3	-0.0811427	1.09026		3	-0.021711	0.373444
Q922D8	Mthfd1	2.8e-18	101200	MOUSE	C-1-tetrahydrofolate synthase, cytoplasmic	-0.0116165	0.339938	0.04688		0.0424641	0.138913	-0.00652923		3	0.125067	0.733893		3	0.0582827	0.815672
Q5FWJ5	Hnrnpk	1.3e-24	51028.7	MOUSE	Hnrpk protein	-0.00878247	-0.163904	-0.151764		-0.169814	-0.265436	-0.189109		3	-0.10815	1.09137		3	-0.20812	2.01965
D3Z5X4	Gm7964	6.7e-21	48466.9	MOUSE	Uncharacterized protein					-0.360826				0	#DIV/0!	#DIV/0!		1	-0.360826	#DIV/0!
Q61584	Fxr1	1.6e-21	76222.6	MOUSE	Fragile X mental retardation syndrome-related protein 1	-0.0540741	0.0696637	-0.193585		-0.254541	-0.240813	-0.336664		3	-0.0593318	0.587615		3	-0.277339	2.24247
Q6P5B5	Fxr2	4.9e-22	74253.9	MOUSE	Fragile X mental retardation syndrome-related protein 2	0.180513	0.572125	-0.021132		0.233303	0.298527	0.174151		3	0.243836	0.829067		3	0.235327	1.9486
P35922	Fmr1	6.1e-17	68989.6	MOUSE	Fragile X mental retardation protein 1 homolog	-0.113071	-0.103838	-0.0264634		-0.0718387	-1.01528	-0.209301		3	-0.0811242	1.30971		3	-0.43214	0.854358
Q08509	Eps8	3.7e-28	91738	MOUSE	Epidermal growth factor receptor kinase substrate 8	-0.0844467	-0.0495213	-0.0678902		-0.205249	-0.149757	-0.167325		3	-0.0672861	1.96374		3	-0.17411	2.36006
A2AFQ9	Gemin5	4.3e-20	166523	MOUSE	Gem-associated protein 5	-0.138942	-0.0918621	-0.142139		-0.130012	-0.0635527	-0.0343584		3	-0.124314	2.07921		3	-0.0759745	1.23931
Q9EQK5	Mvp	5.7e-18	95925.1	MOUSE	Major vault protein	0.116857	0.0488104	0.0914357		-0.106345	-0.0709233	-0.000489292		3	0.085701	1.60476		3	-0.0592526	1.00628
Q3UPU3	Ubr2	5.4e-33	199200	MOUSE	Putative uncharacterized protein	-0.0353129	-0.193952	-0.000626458		-0.0985927	-0.146608	-0.236735		3	-0.0766303	0.78683		3	-0.160645	1.5372
O35134	Polr1a	4.9e-19	194112	MOUSE	DNA-directed RNA polymerase I subunit RPA1	-0.26246	-0.22832	-0.194671		-0.374967	-0.293011	-0.331981		3	-0.228484	2.44035		3	-0.33332	2.60169
B2RXC6	Polr3a	9e-16	155739	MOUSE	DNA-directed RNA polymerase	-0.0585812	-0.117585	0.0206081		0.00443932	-0.0494233	-0.450046		3	-0.0518528	0.789675		3	-0.16501	0.734278
O35737	Hnrnph1	1.2e-28	49199.9	MOUSE	Heterogeneous nuclear ribonucleoprotein H	0.051822	-0.204519	-0.117388		-0.131787	-0.0313838	-0.0966661		3	-0.0900286	0.75184		3	-0.0866123	1.3072
P70333	Hnrnph2	3.4e-32	49280	MOUSE	Heterogeneous nuclear ribonucleoprotein H2	0.386141	0.179306	0.0892362		0.0791289	0.29501	0.373301		3	0.218228	1.18355		3	0.249147	1.27852
Q9Z2X1	Hnrnpf	3.4e-21	45730.3	MOUSE	Heterogeneous nuclear ribonucleoprotein F	-0.176015	-0.479813	0.207043		-0.23894		-0.0886495		3	-0.149595	0.57666		2	-0.163795	0.863552
D3YWT1	Hnrnph3	1.7e-14	35181.9	MOUSE	MCG11326, isoform CRA_b	-0.390398	-0.256529	-0.390495		-0.280973	-0.737764	-0.460841		3	-0.345807	2.08996		3	-0.493193	1.48471
Q9JJ28	Flii	1e-23	144804	MOUSE	Protein flightless-1 homolog	-0.0569051	0.115203	0.0803131		0.127979	0.215317	0.121381		3	0.0462036	0.627218		3	0.154893	1.74305
Q0VG47	Hnrnpa3	9.1e-33	37086.4	MOUSE	Heterogeneous nuclear ribonucleoprotein A3	-0.0595951	-0.189414	-0.0121895		-0.115086	-0.292824	-0.167839		3	-0.0870661	0.917262		3	-0.191916	1.46962
Q3UK83	Hnrnpa1	1.1e-20	38804	MOUSE	Putative uncharacterized protein			0.532302		-0.372677		-0.21888		1	0.532302	#DIV/0!		2	-0.295778	1.09171
D3YWX2	Ylpm1	6.2e-24	241053	MOUSE	YLP motif-containing protein 1	-0.0250792	0.0840089	-0.165781		-0.00964753	-0.0570087	0.0825554		3	-0.0356172	0.474278		3	0.00529971	0.342502
Q64521	Gpd2	3.6e-18	80954.5	MOUSE	Glycerol-3-phosphate dehydrogenase, mitochondrial	0.236245	-0.0164741	0.155668		0.512023	0.449282	0.237385		3	0.125146	0.929693		3	0.399563	1.69224
Q5SWR1	Ap2b1	3e-18	105723	MOUSE	Putative uncharacterized protein	0.173721	0.00106007	0.237112		0.316447	0.191932	2.07969		3	0.137298	1.02005		3	0.86269	0.83471
O35643	Ap1b1	5.6e-18	103936	MOUSE	AP-1 complex subunit beta-1	-0.127122	-0.0226741	0.149545		0.315379	-1.49144	0.315736		3	-8.35946e-05	0.301348		3	-0.286774	0.467923
Q91VR5	Ddx1	2.7e-19	82500.9	MOUSE	ATP-dependent RNA helicase DDX1	-0.0720263	-0.0113728	-0.0593089		-0.07852	0.0514629	-0.114643		3	-0.0475693	1.20965		3	-0.0472333	0.649857
Q9CY58	Serbp1	7.5e-24	44714.5	MOUSE	Plasminogen activator inhibitor 1 RNA-binding protein	-0.0948196	0.635333	-0.275009		-0.526155	-0.503138	-0.565199		3	0.0885014	0.408586		3	-0.531497	3.23679
Q99MR6	Srrt	2.2e-17	100453	MOUSE	Serrate RNA effector molecule homolog	-0.077422	-0.196828	-0.0747143		0.0544212	0.0539712	0.0671143		3	-0.116321	1.29317		3	0.0585022	2.57034
Q5PSV9	Mdc1	3.1e-23	184672	MOUSE	Mediator of DNA damage checkpoint protein 1	0.078076	0.179049	-0.0476107		-0.0185924	-0.0434795	0.13029		3	0.0698382	0.700772		3	0.0227394	0.446212
P50516	Atp6v1a	7.5e-24	68326.7	MOUSE	V-type proton ATPase catalytic subunit A	0.0215667	0.0104651	0.0472896		0.106905	0.137548	0.207446		3	0.0264405	1.16679		3	0.150633	1.73439
Q3UF95	Bag6	9.7e-25	119145	MOUSE	Large proline-rich protein BAG6	0.0659591	-0.052508	-0.0236266		0.187948	0.0584915	0.0519028		3	-0.00339182	0.331194		3	0.0994475	1.11393
E9PV41	Diap1	9.5e-21	140403	MOUSE	Protein Diap1	-0.123622	-0.0622668	0.0653048		-0.00547889	0.0838395	7.84299e-05		3	-0.0401947	0.564537		3	0.0261464	0.637339
P70227	Itpr3	8.5e-22	304278	MOUSE	Inositol 1,4,5-trisphosphate receptor type 3	0.175064	0.0210078	0.143923		-0.27003	-0.223728	-0.145483		3	0.113332	1.16258		3	-0.21308	1.85568
Q07139	Ect2	1.6e-18	103132	MOUSE	Protein ECT2	0.0436975	0.446614	0.203992		0.0708783	-0.0839902	0.157529		3	0.231435	1.02966		3	0.048139	0.548285
A2AL36	Cntrl	1.6e-16	268882	MOUSE	Centriolin	-0.280569	-0.0827878	0.0238974		-0.0806453		-0.241477		3	-0.113153	0.779567		2	-0.161061	0.831497
P84099	Rpl19	3.5e-17	23466.2	MOUSE	60S ribosomal protein L19	-0.402456	-0.270529	-0.0695379		-0.441829	-0.330145	-0.276556		3	-0.247508	1.20442		3	-0.34951	2.02562
Q6ZWV7	Rpl35	1.3e-12	14552.7	MOUSE	60S ribosomal protein L35					-0.407571				0	#DIV/0!	#DIV/0!		1	-0.407571	#DIV/0!
A0AUP1	Ccdc112	5.8e-14	52777.5	MOUSE	Coiled-coil domain-containing protein 112			0.646426		-0.303515		0.678594		1	0.646426	#DIV/0!		2	0.18754	0.41581
P11881	Itpr1	3e-13	313170	MOUSE	Inositol 1,4,5-trisphosphate receptor type 1		0.137445	-3.74047		-1.8522				2	-1.80151	0.582211		1	-1.8522	#DIV/0!
H3BJQ9	Cux1	2e-19	165771	MOUSE	Homeobox protein cut-like 1	-0.104552	-0.184247	0.00646603		-0.02049	-0.0397013	-0.000796064		3	-0.0941108	0.937601		3	-0.0203291	0.974695
P68373	Tuba1c	2.7e-26	49909.8	MOUSE	Tubulin alpha-1C chain	-0.403595		0.387618		0.0948779				2	-0.00798862	0.306648		1	0.0948779	#DIV/0!
P05213	Tuba1b	2.7e-26	50152.1	MOUSE	Tubulin alpha-1B chain		0.0700992				0.255565	-0.0200988		1	0.0700992	#DIV/0!		2	0.117733	0.560696
P68368	Tuba4a	1.8e-26	49924.9	MOUSE	Tubulin alpha-4A chain	-0.0263062	0.0781597	0.0113968		0.253973	0.326156	-0.584654		3	0.0210834	0.551789		3	-0.00150868	0.302618
P05214	Tuba3a	2.7e-26	49960	MOUSE	Tubulin alpha-3 chain					-0.0933292				0	#DIV/0!	#DIV/0!		1	-0.0933292	#DIV/0!
P49717	Mcm4	2.5e-24	96737	MOUSE	DNA replication licensing factor MCM4	0.00585612	0.130701	0.0716098		0.372067	0.271121	0.188258		3	0.069389	1.01281		3	0.277149	1.75869
D3YZZ5	Tmed7	1.4e-14	25200.8	MOUSE	Protein Tmed7	0.168359	0.537681	0.0849359		-1.29063	0.61775			3	0.263658	1.00321		2	-0.336439	0.406604
Q9CWV1	Mcm8	3.9e-11	92371.9	MOUSE	DNA helicase MCM8			2.20502			0.472591	-0.417533		1	2.20502	#DIV/0!		2	0.0275291	0.318455
Q3V1V3	Esf1	3.1e-26	98049.1	MOUSE	ESF1 homolog	0.0196867	0.530605	-0.322567		-0.71959	-0.659899	-0.561553		3	0.0759082	0.404297		3	-0.647014	2.59924
P97770	Thumpd3	5.6e-17	56431.6	MOUSE	THUMP domain-containing protein 3	7.18138	0.0932495	0.0705223		0.0213613	0.229099	-0.056729		3	2.44838	0.688711		3	0.064577	0.578379
Q8VDF2	Uhrf1	9.9e-19	88304.4	MOUSE	E3 ubiquitin-protein ligase UHRF1	-0.0480012	-0.268847	-0.0314389		-0.345672	-0.249957	-0.230401		3	-0.116096	0.872043		3	-0.275343	2.08826
Q7TMI3	Uhrf2	2.2e-17	90106.6	MOUSE	E3 ubiquitin-protein ligase UHRF2	0.330603	0.534762	0.103542		-0.685272	0.089609	0.0899738		3	0.322969	1.21445		3	-0.168563	0.536792
Q99LF4	D10Wsu52e	5.7e-25	55249.8	MOUSE	tRNA-splicing ligase RtcB homolog	-0.0624253	-0.0778012	-0.00925302		0.0178069	0.132742	0.050714		3	-0.0498265	1.15955		3	0.0670877	1.02545
Q7TMK9	Syncrip	2.8e-25	69633.2	MOUSE	Heterogeneous nuclear ribonucleoprotein Q	-0.106252	-0.185143	-0.0143379		-0.171945	-0.086272	-0.55035		3	-0.101911	1.0581		3	-0.269522	1.00158
Q3U8W9	Hnrnpr	1.8e-17	70878.6	MOUSE	Putative uncharacterized protein	-0.0837715	-0.129794	0.00860254		-0.075992	-0.0265299	0.0287157		3	-0.0683209	0.929663		3	-0.0246021	0.600869
Q9Z1Z0	Uso1	1.2e-19	106984	MOUSE	General vesicular transport factor p115	-0.0746598	0.0851589	-0.0045119		0.185388	0.114802	0.167078		3	0.00199572	0.314481		3	0.155756	2.04718
Q3UCF2	Cdc5l	3.6e-23	92190.3	MOUSE	MCG18249, isoform CRA_a	-0.0599344	0.0233411	-0.191575		-0.197415	-0.201517	-0.402752		3	-0.0760559	0.759292		3	-0.267228	1.5323
Q9D0C4	Trmt5	9.1e-17	56794.9	MOUSE	tRNA (guanine(37)-N1)-methyltransferase	-0.0869699	-0.0869516	0.00200713		-0.00354638	-0.409966	0.588277		3	-0.0573048	1.0154		3	0.058255	0.366894
P30999	Ctnnd1	1.3e-23	104926	MOUSE	Catenin delta-1	0.057765	-0.150181	-0.13835		-0.233686	-0.0416482	-0.210619		3	-0.076922	0.730304		3	-0.161984	1.23701
Q7TPH6	Mycbp2	9.7e-22	517742	MOUSE	Probable E3 ubiquitin-protein ligase MYCBP2	-0.0216487	-0.0241546	0.0418555		0.00184874	0.151647	-0.216872		3	-0.00131592	0.320137		3	-0.0211255	0.365657
Q61550	Rad21	7.8e-26	72083.6	MOUSE	Double-strand-break repair protein rad21 homolog	-0.0572882	-0.0594094	-0.0153929		-0.343085	-0.307885	-0.224502		3	-0.0440302	1.33903		3	-0.291824	2.14848
G3X963	Atad2	2.1e-21	155286	MOUSE	ATPase family AAA domain-containing protein 2	0.515819	0.327288	0.422544		0.0352156	-0.250277	-0.141357		3	0.421884	2.0905		3	-0.118806	0.839521
E9Q166	Atad2b	1.6e-10	164725	MOUSE	Protein Atad2b	-0.700864	-0.914007	-0.0872031		-0.673607	-1.97844	-0.00257074		3	-0.567358	1.12712		3	-0.884872	0.875061
Q9Z0W3	Nup160	1e-20	158233	MOUSE	Nuclear pore complex protein Nup160	0.0579606	-0.0886432	0.121913		0.0351942	0.00539702	0.0202486		3	0.03041	0.472471		3	0.0202799	1.14738
Q8CB77	Tceb3	3.2e-23	87162	MOUSE	Transcription elongation factor B polypeptide 3	0.159964	0.0774679	-0.0805844		-0.0697609	-0.109204	0.0693519		3	0.0522826	0.571891		3	-0.0365378	0.5456
Q8R5H1	Usp15	1e-20	112326	MOUSE	Ubiquitin carboxyl-terminal hydrolase 15	0.066464	0.124829	-0.0984721		-0.135766	0.334672	-0.0923531		3	0.0309404	0.462798		3	0.0355177	0.379357
P35123	Usp4	9.8e-24	108344	MOUSE	Ubiquitin carboxyl-terminal hydrolase 4	0.0914871	0.0883786	-0.0554917		0.0195758	0.00593456	-0.00173857		3	0.041458	0.617458		3	0.00792394	0.780597
Q7TPW1	Nexn	1.7e-11	72108.5	MOUSE	Nexilin	0.134123				0.227395	0.0576125	-0.126962		1	0.134123	#DIV/0!		3	0.0526819	0.482865
B2RRI2	Sbno1	3.9e-19	153924	MOUSE	Protein strawberry notch homolog 1	-0.307533	-0.272311	-0.246506		-0.310032	-0.142779	-0.305745		3	-0.27545	2.6885		3	-0.252852	1.65486
Q7TNB8	Sbno2	1e-11	149295	MOUSE	Protein strawberry notch homolog 2			0.0521989		0.269213		0.279507		1	0.0521989	#DIV/0!		2	0.27436	2.22396
P58281	Opa1	3.8e-17	111340	MOUSE	Dynamin-like 120 kDa protein, mitochondrial	0.1252	-0.002564	0.00327006		0.314561	0.33949	0.280314		3	0.0419686	0.678077		3	0.311455	2.8211
Q3TWN8	Aldh18a1	6.8e-24	87264	MOUSE	Putative uncharacterized protein	0.0783603	-0.0470059	0.0887642		0.310817	0.401189	0.297004		3	0.0400395	0.642429		3	0.336337	2.33236
E9PZJ8	Ascc3	7e-18	250559	MOUSE	Activating signal cointegrator 1 complex subunit 3	-0.526981	-0.0274533	0.0072377		-0.118493	-0.126408	-0.123426		3	-0.182399	0.697485		3	-0.122775	3.75308
A0ZVB6	Btaf1	3.5e-19	207048	MOUSE	TBP-associated factor 170	0.0121624	0.0766544	-0.0783686		-0.0379749	0.0427205	0.116039		3	0.00348272	0.325456		3	0.0402614	0.637429
P24547	Impdh2	2.1e-19	55815.5	MOUSE	Inosine-5'-monophosphate dehydrogenase 2	-0.683424	-0.729188	-0.776341		-0.835208	-0.821797	-1.04794		3	-0.729651	3.1711		3	-0.901649	2.48578
P50096	Impdh1	4.2e-14	55279	MOUSE	Inosine-5'-monophosphate dehydrogenase 1	-0.882207	-0.848156	-0.882863		-1.1033	-1.17577	-2.79008		3	-0.871075	4.06279		3	-1.68972	1.33824
A3KGI3	Casc5	3.2e-19	238187	MOUSE	Protein CASC5	0.0250797	0.403451	0.268326		0.405838	-0.147879	0.519695		3	0.232286	1.06864		3	0.259218	0.775212
D3Z0M9	Ddx23	3.1e-18	95495.3	MOUSE	MCG18410, isoform CRA_a	-0.10946	-0.072531	0.0264689		0.0227106	0.0676016	-0.0830137		3	-0.0518407	0.782945		3	0.00243283	0.318082
E9Q1G8	2025-09-07	3.8e-22	50649.4	MOUSE	Septin-7	-0.0675494	-0.0835277	0.0275143		0.0547785	0.0148179	0.0630432		3	-0.0411876	0.748757		3	0.0442132	1.3135
Q60848	Hells	8.4e-17	95126.5	MOUSE	Lymphocyte-specific helicase	-0.329411	-0.320376	-0.289701		-0.495723	-0.635245	-0.571231		3	-0.313163	3.13391		3	-0.5674	2.601
P35564	Canx	8.7e-20	67278.5	MOUSE	Calnexin	0.10415	-0.0944799	0.119618		0.107354	0.109029	-0.0168934		3	0.0430962	0.526024		3	0.0664965	0.899944
E9Q5W5	Zzef1	1.8e-18	328272	MOUSE	Zinc finger ZZ-type and EF-hand domain-containing protein 1	0.0962532	0.262997	0.205357		0.439779	0.399106	0.239722		3	0.188202	1.51325		3	0.359536	1.85949
O70194	Eif3d	2.8e-22	63989.3	MOUSE	Eukaryotic translation initiation factor 3 subunit D	-0.0995207	-0.170555	-0.0268827		-0.248245	-0.204788	-0.11921		3	-0.0989862	1.15585		3	-0.190748	1.7294
Q91YE6	Ipo9	3.4e-21	116053	MOUSE	Importin-9	0.121563	0.0469597	0.0978912		0.218321	0.254534	0.360859		3	0.0888046	1.55058		3	0.277905	1.94157
Q3TF87	Dars	2.8e-21	57103.7	MOUSE	Putative uncharacterized protein	-0.0927912	-0.0961207	-0.0574239		0.0260629	0.0488414	0.0370894		3	-0.0821119	1.95882		3	0.0373312	1.82882
F8VQ29	Iqgap3	3.2e-17	185355	MOUSE	Protein Iqgap3	0.15853	0.191862	0.196376		-0.0258706	0.0227415	0.19985		3	0.182256	2.67157		3	0.0655735	0.65763
Q11011	Npepps	2e-16	103326	MOUSE	Puromycin-sensitive aminopeptidase	-0.101161	-0.0661734	-0.0496602		-0.0533623	0.0516357	0.0302001		3	-0.0723314	1.68461		3	0.00949116	0.400705
Q6A0A9	FAM120A	3e-27	121647	MOUSE	Constitutive coactivator of PPAR-gamma-like protein 1	0.0290591	-0.0303932	0.0461548		-0.106515	-0.0130673	0.00350808		3	0.0149402	0.533467		3	-0.0386915	0.726014
P16858	Gapdh	9e-23	35810.3	MOUSE	Glyceraldehyde-3-phosphate dehydrogenase	-0.0706893	-0.170987	-0.0797181		-0.20809	-0.0299818	0.188219		3	-0.107131	1.4036		3	-0.0166174	0.347753
D3YU05	Gm6316	1.6e-20	36542.2	MOUSE	Glyceraldehyde-3-phosphate dehydrogenase			-0.582477						1	-0.582477	#DIV/0!		0	#DIV/0!	#DIV/0!
Q920R0	Als2	2.4e-13	182568	MOUSE	Alsin	0.0856517	0.37882	0.1553		0.567093	0.488965	-0.117817		3	0.206591	1.14106		3	0.312747	0.845632
Q6IWE3	380687	9.3e-19	10021.6	MOUSE	Glyceraldehyde-3-phosphate-dehydrogenase (Fragment)					0.0092185				0	#DIV/0!	#DIV/0!		1	0.0092185	#DIV/0!
Q3V2I5	Gapdhs	1.9e-13	25185	MOUSE	Glyceraldehyde-3-phosphate dehydrogenase (Fragment)					-0.47524				0	#DIV/0!	#DIV/0!		1	-0.47524	#DIV/0!
Q80X98	Dhx38	1.2e-17	140624	MOUSE	DEAH (Asp-Glu-Ala-His) box polypeptide 38	-0.0103453	-0.149167	-0.123187		-0.111825	-0.190955	-0.0449988		3	-0.0942329	1.10369		3	-0.115926	1.25637
P39054	Dnm2	1.1e-26	98146.1	MOUSE	Dynamin-2	0.125992	0.220006	0.103984		0.374189	0.440447	0.175963		3	0.149994	1.5857		3	0.3302	1.5742
P39053	Dnm1	1.2e-20	97803.6	MOUSE	Dynamin-1	0.336237	0.639116	0.280553		0.679217	0.979116	0.258343		3	0.418635	1.49427		3	0.638892	1.33512
Q8BUT2	Dnm3	1.8e-13	92864.2	MOUSE	Putative uncharacterized protein			5.40918						1	5.40918	#DIV/0!		0	#DIV/0!	#DIV/0!
Q61753	Phgdh	4.3e-23	56586.1	MOUSE	D-3-phosphoglycerate dehydrogenase	-0.234822	-0.233152	-0.0874087		-0.0892341	-0.0783009	-0.0699913		3	-0.185127	1.50075		3	-0.0791754	2.60939
Q9D706	Rpap3	8.7e-20	74096.2	MOUSE	RNA polymerase II-associated protein 3	-0.00795801	-0.0992062	-0.0496627		-0.217994	-0.103974	-0.108657		3	-0.0522756	1.03162		3	-0.143542	1.5141
P56960	Exosc10	5.4e-18	100943	MOUSE	Exosome component 10	0.350071	0.474367	-0.0374078		-0.0931795	-0.166538	-0.558503		3	0.262343	0.937779		3	-0.27274	1.00087
O35218	Cpsf2	9.7e-23	88383.4	MOUSE	Cleavage and polyadenylation specificity factor subunit 2	-0.148603	-0.170952	0.000223173		-0.123575	-0.228626	-0.18812		3	-0.106444	1.03137		3	-0.180107	1.85927
E9QML5	Zfml	2.7e-20	214462	MOUSE	Protein Zfml	-0.239814	-0.1992				-0.463041	-0.292021		2	-0.219507	1.53219		2	-0.377531	1.14935
Q61464	Znf638	2.7e-20	218136	MOUSE	Zinc finger protein 638		-0.278308	-0.29572		-0.504586				2	-0.287014	2.01537		1	-0.504586	#DIV/0!
Q6ZPH4	Rangap1	1.8e-19	69463.1	MOUSE	MKIAA1835 protein (Fragment)	-0.136722	-0.114948	-0.0834794		0.202492	0.133704	0.054027		3	-0.111717	2.03141		3	0.130074	1.3292
Q9DBR1	Xrn2	4.5e-19	108688	MOUSE	5'-3' exoribonuclease 2	-0.0470486	-0.204743	-0.0426294		-0.179446	-0.298453	0.00776662		3	-0.0981403	0.985021		3	-0.156711	0.95709
P40124	Cap1	1.6e-34	51565.3	MOUSE	Adenylyl cyclase-associated protein 1	0.0707496	0.0518802	0.121371		0.201052	0.267995	0.302209		3	0.0813335	1.52773		3	0.257085	2.18407
Q91VU7	Pus7	4.4e-18	74793.4	MOUSE	Protein Pus7	-0.154416	-0.203681	-0.112134		-0.223728	-0.2164	-0.0753685		3	-0.156744	1.86454		3	-0.171832	1.45178
Q9Z1X4	Ilf3	1.1e-21	96021.8	MOUSE	Interleukin enhancer-binding factor 3	-0.00219008	-0.0304701	-0.0170759		0.00488852	-0.0905277	-0.0157654		3	-0.0165787	1.04696		3	-0.0338015	0.740203
Q91WM1	Strbp	7.4e-15	73705.3	MOUSE	Spermatid perinuclear RNA-binding protein	0.121214	-0.283852	-0.218095		-0.422299	-0.553141			3	-0.126911	0.679474		2	-0.48772	1.37219
Q8CFI7	Polr2b	4.2e-16	133912	MOUSE	DNA-directed RNA polymerase II subunit RPB2	-0.182249	-0.211955	-0.126524		-0.356656	-0.319653	-0.193976		3	-0.173576	1.99604		3	-0.290095	1.85989
O35286	Dhx15	9.3e-26	91007.7	MOUSE	Putative pre-mRNA-splicing factor ATP-dependent RNA helicase DHX15	-0.431196	-0.425251	-0.207903		-0.439779	-0.417091	-0.484787		3	-0.354783	1.69574		3	-0.447219	3.00595
Q80TX4	Dhx16	5.9e-18	116110	MOUSE	MKIAA0577 protein (Fragment)	0.0287262	-0.0826878	0.0473824		-0.0790801	0.0693089	0.346563		3	-0.00219307	0.317928		3	0.112264	0.635357
Q3UQQ4	Dhx8	2.5e-17	142557	MOUSE	Putative uncharacterized protein	-0.0401677	-0.226676	-0.00503303		-0.272438	-0.323795	-0.0800395		3	-0.0906255	0.798183		3	-0.225424	1.33074
O88569	Hnrnpa2b1	4.7e-27	37403	MOUSE	Heterogeneous nuclear ribonucleoproteins A2/B1	-0.192601	-0.180315	-0.118405		-0.114507	-0.200344	-0.207011		3	-0.163774	2.02015		3	-0.173954	1.85249
Q80SW1	Ahcyl1	4.9e-23	58952	MOUSE	Putative adenosylhomocysteinase 2	-0.193073	-0.245247	-0.160588		-0.191881	-0.192047	-0.17841		3	-0.199636	2.12739		3	-0.187446	3.53722
P50247	Ahcy	4.5e-21	47688.6	MOUSE	Adenosylhomocysteinase	-0.0469903	-0.151841	0.00389255		0.0496326	0.0751642	0.109459		3	-0.0649796	0.835465		3	0.0780854	1.63919
F8WGT1	Ahcyl2	3e-20	66771.9	MOUSE	Adenosylhomocysteinase	-0.0287483	0.0210579	-0.113339		0.228162	0.352078	0.22448		3	-0.0403432	0.68628		3	0.26824	1.92855
A2AKG8	Focad	2e-12	198952	MOUSE	Focadhesin	-0.0302415	0.012878	-3.16561		-0.135939	-0.330578	-1.09666		3	-1.06099	0.678283		3	-0.521059	0.963455
Q8BZF8	Pgm5	3e-08	62220.6	MOUSE	Phosphoglucomutase-like protein 5	-0.0301392	-0.231209	-0.0118642		0.96314	-0.459897	0.111261		3	-0.0910708	0.790001		3	0.204834	0.475357
P54103	Dnajc2	1.9e-20	71722.4	MOUSE	DnaJ homolog subfamily C member 2	-0.1516	0.184262	-0.193016		-0.0507279	-0.0822834	-0.32691		3	-0.0534515	0.456963		3	-0.153307	0.956483
Q3TH57	Tcerg1	1.2e-17	123789	MOUSE	MCG127945, isoform CRA_a	-0.23525	-0.198027	-0.0276044		-0.0461267	-0.111859	0.0100443		3	-0.153627	1.16072		3	-0.0493139	0.829009
Q9ERG0	Lima1	3.7e-22	84060.5	MOUSE	LIM domain and actin-binding protein 1	0.345508	0.594846	0.0861672		0.138395	0.140724	0.209539		3	0.342174	1.13925		3	0.162886	2.00186
Q8BGB5	Limd2	1.7e-15	14237.3	MOUSE	LIM domain-containing protein 2	-0.346513	1.30227	2.56174			-0.198412			3	1.1725	0.826232		1	-0.198412	#DIV/0!
Q9R1C7	Prpf40a	3.9e-19	108482	MOUSE	Pre-mRNA-processing factor 40 homolog A	-0.158479	-0.263912	-0.0709716		-0.11765	-0.09818	0.0363437		3	-0.164454	1.30823		3	-0.0598289	0.767012
Q80W14	Prpf40b	1.3e-10	99300.8	MOUSE	Pre-mRNA-processing factor 40 homolog B	0.0662658	0.0998994			0.149176	0.106696	0.222164		2	0.0830826	1.19674		3	0.159345	1.67801
Q7TT37	Ikbkap	5.7e-20	149585	MOUSE	Elongator complex protein 1	-0.0759187	-0.0280579	0.0692222		0.126527	-0.469274	0.148594		3	-0.0115848	0.391691		3	-0.0647176	0.409244
Q8C3Y4	Kntc1	9.7e-19	250360	MOUSE	Kinetochore-associated protein 1	0.219225	0.237855	0.2063		0.395063	0.482464	0.487931		3	0.221127	3.06777		3	0.455153	2.66344
Q3URE1	Acsf3	3.6e-16	65077.2	MOUSE	Acyl-CoA synthetase family member 3, mitochondrial	0.112908	-0.0722809	0.284578		0.413499	0.40993	0.24089		3	0.108402	0.695574		3	0.354773	1.90633
P10711	Tcea1	2e-23	33880.8	MOUSE	Transcription elongation factor A protein 1	-0.206494	-0.287874	-0.195542		-0.173635	-0.189291	-0.254368		3	-0.22997	2.10617		3	-0.205765	2.15101
Q8BHB4	Wdr3	2.6e-24	105776	MOUSE	WD repeat-containing protein 3	-0.27322	-0.311984	-0.225704		-0.348592	-0.449143	-0.235777		3	-0.270303	2.3761		3	-0.344504	1.81613
E9PUQ9	Piezo1	4.7e-20	291994	MOUSE	Piezo-type mechanosensitive ion channel component 1	0.0715894	-0.277927	0.0377782		0.501725	0.52178	0.251916		3	-0.0561863	0.478984		3	0.42514	1.70717
Q3U4P3	Dnm1l	2.2e-19	79488.9	MOUSE	Putative uncharacterized protein (Fragment)	0.0242545	0.0816863	0.0308323		0.273878	0.263868	0.0248539		3	0.045591	1.19185		3	0.187533	1.13156
O08663	Metap2	9.6e-23	52922.2	MOUSE	Methionine aminopeptidase 2	-0.091579	-0.144657	-0.0119647		-0.223522	-0.00936511	-0.0881316		3	-0.0827337	1.08341		3	-0.107006	0.940817
O35638	Stag2	7.6e-21	141283	MOUSE	Cohesin subunit SA-2	-0.0366572	0.496134	-0.0482873		-0.150185	0.00400395	-0.0556974		3	0.137063	0.580844		3	-0.0672927	0.865534
Q9D3E6	Stag1	1.3e-21	144442	MOUSE	Cohesin subunit SA-1	-0.106016	-0.231839	-0.222793		-0.755978	-0.5924	-0.511478		3	-0.186882	1.65825		3	-0.619952	2.18079
O70576	Stag3	1.2e-05	141169	MOUSE	Cohesin subunit SA-3	0.0625402								1	0.0625402	#DIV/0!		0	#DIV/0!	#DIV/0!
Q9JIF7	Copb1	8.6e-19	107067	MOUSE	Coatomer subunit beta	0.0782997	0.192225	0.157709		0.143798	0.252339	0.166391		3	0.142745	1.5888		3	0.18751	1.82805
E9Q5F9	Setd2	8.8e-25	285666	MOUSE	Protein Setd2	-0.178542	-0.167308	-0.196638		-1.14535	-0.39235	0.0867071		3	-0.180829	2.95373		3	-0.483663	0.809919
Q8C9B9	Dido1	4.5e-26	247178	MOUSE	Death-inducer obliterator 1	0.0376634	-0.0161455	-0.178056		-0.433622	-0.280796	-0.22861		3	-0.0521793	0.597436		3	-0.314343	1.74202
Q9WTX6	Cul1	2.5e-19	89692.3	MOUSE	Cullin-1	-0.231343	-0.141923	-0.0358188		-0.10848	-0.0212756	0.0109365		3	-0.136362	1.1635		3	-0.0396062	0.718444
Q9D0F1	Ndc80	3.3e-25	73962.4	MOUSE	Kinetochore protein NDC80 homolog	0.237001	0.316383	0.269448		0.442396	0.47279	0.580497		3	0.274278	2.45692		3	0.498561	2.45667
Q9JLI8	Sart3	5.8e-18	109620	MOUSE	Squamous cell carcinoma antigen recognized by T-cells 3	-0.0356489	-0.0929419	0.0464894		0.0704768	0.036669	0.0962575		3	-0.0273671	0.546261		3	0.0678011	1.52961
Q3B7Z2	Osbp	1.6e-31	88797.3	MOUSE	Oxysterol-binding protein 1	0.378833	-0.0316059	0.144305		0.314253	0.385004	0.266716		3	0.163844	0.820908		3	0.321991	2.25182
P10126	Eef1a1	1.8e-23	50114.3	MOUSE	Elongation factor 1-alpha 1	-0.022641	0.090196	-0.0815799		-0.0542332	0.0356727	-0.128614		3	-0.00467497	0.33043		3	-0.0490582	0.688038
Q3TFD0	Shmt2	6e-18	55420.8	MOUSE	Putative uncharacterized protein	-0.119587	-0.104815	0.0312651		-0.0518074	-0.0456404	0.0612174		3	-0.0643787	0.80694		3	-0.0120768	0.412676
Q4FK49	Ppa1	2.3e-22	32667.4	MOUSE	Pyp protein	-0.223645	-0.24568	-0.11376		-0.21153	-0.25756	-0.0969519		3	-0.194362	1.68455		3	-0.188681	1.53399
A2AIX1	Sec16a	3.8e-27	256475	MOUSE	Protein Sec16a	0.13307	0.326075	0.158343		0.321688	0.26571	0.323317		3	0.205829	1.41598		3	0.303572	2.71347
Q80T06	Eef1d	9e-21	31292.3	MOUSE	Elongation factor 1-delta	-0.145868	-0.0421727	-0.0909627		-0.117564	-0.0871666	-0.152085		3	-0.0930013	1.34705		3	-0.118938	1.92138
O70251	Eef1b	2.6e-29	24693.9	MOUSE	Elongation factor 1-beta	-0.218937	-0.227745	-0.0834093		-0.0968292	-0.148796	0.00346119		3	-0.176697	1.49946		3	-0.0807213	0.973483
Q3TDA7	Pacsin2	3.4e-24	55833.3	MOUSE	Protein kinase C and casein kinase substrate in neurons 2, isoform CRA_a	-0.040195	-0.0675784	0.0652851		-0.0161224	0.127403	0.161812		3	-0.0141628	0.420233		3	0.0910311	0.926733
Q6PAR5	Gapvd1	2e-26	162404	MOUSE	GTPase-activating protein and VPS9 domain-containing protein 1	0.0283534	-0.103199	-0.0212332		0.0174616	-0.0764519	-0.0327739		3	-0.0320261	0.609418		3	-0.0305881	0.725082
Q3T9L0	Ddx39	9.4e-23	49085.9	MOUSE	Putative uncharacterized protein	-0.129409	-0.199344	-0.0828313		-0.189908	-0.111018	-0.190533		3	-0.137195	1.55398		3	-0.16382	1.90304
Q9Z1N5	Ddx39b	3.8e-21	49035.8	MOUSE	Spliceosome RNA helicase Ddx39b	-0.241003	-0.191191	-0.0502109		-0.102043	-0.820122	-0.13755		3	-0.160801	1.27383		3	-0.353238	0.870093
P09055	Itgb1	2.8e-29	88232.2	MOUSE	Integrin beta-1	-0.0365303	-0.189844	-0.0340519		-0.0376913	0.0983787	-0.108309		3	-0.0868089	0.931712		3	-0.0158738	0.388259
Q9JLN9	Mtor	4.2e-17	288792	MOUSE	Serine/threonine-protein kinase mTOR	0.1189	0.190102	0.144216		0.113285	0.103889	0.0322968		3	0.151073	2.03386		3	0.0831567	1.38206
Q65Z40	Wapal	3e-26	134071	MOUSE	Wings apart-like protein homolog	-0.192732	0.122155	-0.244334		-0.539076	-0.359043	-0.270502		3	-0.10497	0.641913		3	-0.38954	1.71255
Q7TQH0	Atxn2l	8.6e-20	110650	MOUSE	Ataxin-2-like protein	0.00154612	0.108967	-0.128098		-0.0960181	-0.0697355	-0.297388		3	-0.00586153	0.328071		3	-0.15438	1.08384
O70305	Atxn2	1.5e-25	136486	MOUSE	Ataxin-2	0.00981493	0.193149	-0.325583		-0.488023	-0.238829	-0.398948		3	-0.040873	0.39091		3	-0.375267	1.74798
D3Z061	Uba6	1.1e-26	114770	MOUSE	Ubiquitin-like modifier-activating enzyme 6	-0.0409178	0.0920497	-0.0125711		0.329333	0.289705	0.0257387		3	0.0128536	0.40855		3	0.214926	1.11705
Q99JF8	Psip1	5.9e-23	59697.3	MOUSE	PC4 and SFRS1-interacting protein	0.0981894	0.326608	0.0745858		-0.0163806	0.00742088	-0.0420255		3	0.166461	1.06016		3	-0.0169951	0.749531
Q3UMU9	Hdgfrp2	1.1e-25	74291.2	MOUSE	Hepatoma-derived growth factor-related protein 2	0.119837	-0.116086	0.095991		0.389853	0.405903	0.296759		3	0.0332473	0.455416		3	0.364172	2.36574
P51859	Hdgf	1.3e-24	26268.9	MOUSE	Hepatoma-derived growth factor	-0.0183488	-0.201478	-0.115575		-0.286787	-0.146642	-0.1113		3	-0.111801	1.0734		3	-0.181576	1.41371
Q3TR90	Hdgfrp3	8.2e-13	19822.2	MOUSE	Putative uncharacterized protein		0.153825							1	0.153825	#DIV/0!		0	#DIV/0!	#DIV/0!
Q3UGC7	Eif3j1	1.6e-36	29343.9	MOUSE	Eukaryotic translation initiation factor 3 subunit J-A	-0.010969	-0.194271	-0.0697009		-0.102275	-0.256289	0.000126972		3	-0.0916471	0.935552		3	-0.119479	0.903007
Q66JS6	Eif3j2	5.9e-34	29486	MOUSE	Eukaryotic translation initiation factor 3 subunit J-B	-0.0394888		-0.0717467		0.158283		0.0141661		2	-0.0556177	1.04651		2	0.0862247	0.654455
O08528	Hk2	2.5e-19	102536	MOUSE	Hexokinase-2	0.0465774	0.0602728	0.0158521		0.251208	0.133746	0.144699		3	0.0409008	1.34928		3	0.176551	1.67577
P17710	Hk1	2.3e-21	108304	MOUSE	Hexokinase-1	0.0206014	-0.0291595	0.155576		0.252709	0.21044	0.272826		3	0.0490058	0.630568		3	0.245325	2.55529
Q8BJ34	Marf1	3e-13	192066	MOUSE	Meiosis arrest female protein 1	0.234804	0.0153404	0.105551		0.258868	0.109051	0.431668		3	0.118565	0.992038		3	0.266529	1.28552
O35551	Rabep1	5e-15	99524.6	MOUSE	Rab GTPase-binding effector protein 1	-0.0293958	0.00947295	0.0251641		-0.306753	-0.0944247	-0.312739		3	0.00174709	0.335338		3	-0.237972	1.39675
Q7TNF4	Klc1	1.8e-18	68603.6	MOUSE	Kinesin light chain 1	-0.0385561	0.148124	0.0171622		0.034321	-0.0263594	-0.0798937		3	0.0422432	0.580917		3	-0.0239774	0.566287
Q91YS4	Klc2	2.3e-18	68420.5	MOUSE	Kinesin light chain 2	-0.0444251	0.392114	-0.0856826		-0.324741	-0.232591	-0.141715		3	0.0873355	0.504871		3	-0.233016	1.62196
Q9DBS5	Klc4	7.7e-19	68613.2	MOUSE	Kinesin light chain 4	0.304852	0.682928	0.456587		1.0899	-0.246595	0.966074		3	0.481456	1.61696		3	0.603127	0.83446
Q8K2B3	Sdha	2.8e-19	72586.1	MOUSE	Succinate dehydrogenase [ubiquinone] flavoprotein subunit, mitochondrial	0.0426076	-0.0948891	0.041445		0.192419	0.11264	0.171141		3	-0.00361217	0.326001		3	0.158733	1.96177
Q09XV5	Chd8	8.8e-17	290850	MOUSE	Chromodomain-helicase-DNA-binding protein 8	-0.0175612	0.0827807	0.0033834		-0.158556	0.0602448	-0.146583		3	0.0228676	0.574855		3	-0.0816316	0.733653
A2AJK6	Chd7	1.7e-16	334063	MOUSE	Chromodomain-helicase-DNA-binding protein 7	-0.407098	-0.561136	-0.182704		-1.23093	-0.333984	-0.265344		3	-0.383646	1.43691		3	-0.610086	1.02488
A3KFM7	Chd6	1.5e-14	305400	MOUSE	Protein Chd6			-0.6548		-1.06884		-0.259186		1	-0.6548	#DIV/0!		2	-0.664013	0.758768
Q8BYH8	Chd9	1.7e-16	323863	MOUSE	Chromodomain-helicase-DNA-binding protein 9		0.668446	-4.40618		-1.69943		-1.97404		2	-1.86887	0.525894		2	-1.83673	1.62431
Q3UGJ5	Rasa3	2.8e-23	95916.1	MOUSE	Putative uncharacterized protein	-0.182998	-0.176496	0.0222309		-0.338029	-0.311991	-0.113963		3	-0.112421	0.926224		3	-0.254661	1.46055
G3X918	Rasa2	5.5e-22	96401.9	MOUSE	RAS p21 protein activator 2	0.0943614		-0.107175		-3.00354		0.55386		2	-0.00640668	0.318949		2	-1.22484	0.511386
D3YYU8	Obsl1	2.4e-19	197939	MOUSE	Protein Obsl1	0.0871958	0.037357	0.0342409		-0.221036	0.179746	0.1979		3	0.0529312	1.34224		3	0.0522034	0.432185
A2A7S7	Yars	1.8e-17	63002.3	MOUSE	Tyrosine--tRNA ligase, cytoplasmic	-0.0714695	-0.243797	0.0847322		0.0708774	0.09906	0.164534		3	-0.0768446	0.599447		3	0.111491	1.54745
Q8CG19	Ltbp1	8.4e-25	186719	MOUSE	Latent-transforming growth factor beta-binding protein 1	-0.13715	-0.164787	-0.228623		-0.764644	-0.597282	-0.850437		3	-0.176853	1.94572		3	-0.737455	2.30069
Q6KAT1	Ltbp3	2.9e-18	125793	MOUSE	MFLJ00070 protein (Fragment)	0.485371	-1.15668			0.330634	-5.76465			2	-0.335652	0.424272		2	-2.71701	0.571482
Q8K009	Aldh1l2	4.8e-19	101591	MOUSE	Mitochondrial 10-formyltetrahydrofolate dehydrogenase	0.195844	-0.0591904	0.238725		0.328131	0.282722	0.184876		3	0.125126	0.808726		3	0.265243	1.91247
Q6P4S8	Ints1	4.3e-18	245170	MOUSE	Integrator complex subunit 1	-0.084174	-0.0225463	0.0491345		-0.0403941	-0.0872259	-0.0831071		3	-0.0191953	0.476476		3	-0.0702424	1.67213
Q3TWH4	3110002H16Rik	1.4e-12	74899.1	MOUSE	Putative uncharacterized protein	0.15043	0.134797	0.0773311			0.545336	0.409209		3	0.120852	1.79328		2	0.477272	1.34592
Q91VD9	Ndufs1	3.9e-22	79777.6	MOUSE	NADH-ubiquinone oxidoreductase 75 kDa subunit, mitochondrial	-0.109141	-0.216795	-0.00367604		0.204484	0.14356	0.184361		3	-0.109871	0.966487		3	0.177468	2.29909
Q6A028	Swap70	1.2e-18	68996.5	MOUSE	Switch-associated protein 70	0.147837	0.198399	0.239332		0.313411	0.284141	0.128715		3	0.19519	2.0485		3	0.242089	1.58723
Q3U8F5	Psmd12	1.2e-20	52867.6	MOUSE	Putative uncharacterized protein	0.110743	-0.03694	-0.00172392		0.0501135	0.0742471	0.0767173		3	0.0240263	0.492435		3	0.067026	2.10638
Q8BFR5	Tufm	4.4e-21	49508.8	MOUSE	Elongation factor Tu, mitochondrial	-0.245899	-0.293157	-0.0877569		-0.14423	-0.153804	-0.143398		3	-0.208938	1.40814		3	-0.147144	3.58967
Q9DBE9	Ftsj3	5.7e-27	95533.1	MOUSE	pre-rRNA processing protein FTSJ3	-0.289821	-0.418244	-0.335886		-1.22492	-1.19606	-0.831693		3	-0.347984	2.24214		3	-1.08422	2.17558
Q0VGT1	Diap3	1.9e-19	133703	MOUSE	Diaphanous homolog 3 (Drosophila)	0.138975	0.0716134	-0.00578649		-0.264146	-0.198834	0.0283325		3	0.0682674	0.913272		3	-0.144883	0.914074
Q6ZQ84	Cul3	1.8e-17	91277.7	MOUSE	MKIAA0617 protein (Fragment)	-0.163867	-0.318965	-0.0905558		-0.133708	-0.0896428	-0.193344		3	-0.191129	1.28014		3	-0.138898	1.66004
Q571H0	Urb1	3.6e-18	254616	MOUSE	Nucleolar pre-ribosomal-associated protein 1	-0.352383	-0.377315	-0.274783		-0.555625	-0.489522	-0.486625		3	-0.334827	2.37702		3	-0.510591	3.01281
E9PX68	Slc4a1ap	3.6e-23	82887.2	MOUSE	Protein Slc4a1ap	0.165325	0.328184	0.0483418		0.0925656	0.176707	0.280718		3	0.180617	1.10804		3	0.18333	1.40927
Q923G3	Capzb	6.8e-20	30629	MOUSE	Capping protein (Actin filament) muscle Z-line, beta	0.0278423	-0.0603881	0.0321686		0.101843	0.0644203	0.103109		3	-0.000125711	0.302312		3	0.0897905	2.01332
Q60767	Ly75	1.4e-19	197354	MOUSE	Lymphocyte antigen 75	-0.0736177	-0.0277728	0.0533021		0.133252	0.292501	-0.105835		3	-0.0160295	0.451081		3	0.106639	0.643802
Q5SUR0	Pfas	3.8e-18	144631	MOUSE	Phosphoribosylformylglycinamidine synthase	-0.0953777	-0.109221	-0.0214499		0.0741247	0.0503548	0.22105		3	-0.0753495	1.26102		3	0.115177	1.08715
Q61739	Itga6	1.2e-26	122160	MOUSE	Integrin alpha-6	-0.561429	-0.688102	-0.619715		-0.396096	-0.409617	-0.535599		3	-0.623082	2.76525		3	-0.447104	2.31308
P27612	Plaa	5.2e-22	87221.9	MOUSE	Phospholipase A-2-activating protein	-0.122024	-0.10265	-0.120831		-0.138761	-0.112415	-0.0498463		3	-0.115168	2.83128		3	-0.100341	1.5042
Q80TM9	Nisch	1.6e-21	175014	MOUSE	Nischarin	0.290287	0.174853	0.252649		0.554425	0.392385	0.504132		3	0.239263	2.00903		3	0.483647	2.31602
Q3TRJ1	Vps35	1.4e-19	91713.8	MOUSE	Vacuolar protein sorting 35, isoform CRA_a	0.0462818	0.02672	0.0687762		0.141923	0.164807	0.12511		3	0.0472593	1.52148		3	0.143947	2.49986
Q3TWF7	Anapc5	1.7e-17	82252.4	MOUSE	Putative uncharacterized protein	0.125541	0.0240376	0.123648		0.259376	0.114686			3	0.0910756	1.24802		2	0.187031	0.930028
Q542D9	Tfrc	8.1e-21	85732.1	MOUSE	Transferrin receptor, isoform CRA_a	-0.377546	-0.450316	-0.191983		-0.189546	-0.221112	-0.158048		3	-0.339949	1.6238		3	-0.189569	2.34214
Q03265	Atp5a1	6.5e-19	59753.1	MOUSE	ATP synthase subunit alpha, mitochondrial	-0.0582268	-0.14995	-0.0970837		0.119237	0.159337	0.0257532		3	-0.101753	1.50888		3	0.101443	1.20613
O70481	Ubr1	3.1e-32	200242	MOUSE	E3 ubiquitin-protein ligase UBR1	0.0742784	0.00252313	-0.0583415		-0.0935886	-0.0759307	0.0337644		3	0.00615335	0.353009		3	-0.0452516	0.728434
B2RY04	Dock5	1.3e-21	214431	MOUSE	Dedicator of cytokinesis protein 5	0.226439	0.47737	0.128653		0.315029	-0.130671	0.119048		3	0.277487	1.23596		3	0.101135	0.589159
Q5DTL1	Golga2	4.6e-16	115669	MOUSE	MKIAA4150 protein (Fragment)	0.144386	0.0346013	0.0657479		0.0651369	0.0558561	0.033057		3	0.0815784	1.18764		3	0.05135	1.78562
P07742	Rrm1	1.7e-22	90211.1	MOUSE	Ribonucleoside-diphosphate reductase large subunit	-0.0446225	-0.142649	-0.0777405		-0.407873	-0.367782	-0.25828		3	-0.0883373	1.33809		3	-0.344645	2.08583
P37040	Por	1.9e-21	77044.6	MOUSE	NADPH--cytochrome P450 reductase	0.0269518	-0.177396	0.0317274		0.0687622	0.251065	-0.0718078		3	-0.0395723	0.505953		3	0.0826733	0.629193
Q564E8	Rpl4	1.8e-19	47154.1	MOUSE	Ribosomal protein L4	-0.182369	-0.250544	-0.0529945		-0.357584	-0.305993	-0.296427		3	-0.161969	1.26896		3	-0.320002	2.75642
Q8K0D5	Gfm1	4.7e-21	83550.3	MOUSE	Elongation factor G, mitochondrial	-0.102332	-0.198736	0.0435452		0.26936	0.0856733	0.109497		3	-0.0858408	0.760529		3	0.154844	1.23948
Q9Z1S0	Bub1b	5.7e-23	118394	MOUSE	Mitotic checkpoint serine/threonine-protein kinase BUB1 beta	-0.136618	-0.0957238	-0.192625		-0.175726	-0.140235	-0.0832529		3	-0.141655	1.73124		3	-0.133071	1.71434
P26638	Sars	7.2e-22	58389.2	MOUSE	Serine--tRNA ligase, cytoplasmic	-0.0851988	-0.0594517	0.0311835		0.0527437	0.0770873	-0.0140932		3	-0.0378223	0.703277		3	0.0385793	0.834743
Q9EPL8	Ipo7	3.6e-18	119488	MOUSE	Importin-7	-0.210363	-0.260797	-0.10366		-0.104676	-0.109286	-0.161133		3	-0.191607	1.57047		3	-0.125032	1.99312
Q4FZK2	Eef1g	1.6e-30	50061.2	MOUSE	Eukaryotic translation elongation factor 1 gamma	-0.242728	-0.243404	-0.0873053		-0.169354	-0.162154	0.0306805		3	-0.191146	1.47817		3	-0.100276	0.876957
Q9WVF7	Pole	5.2e-20	262102	MOUSE	DNA polymerase epsilon catalytic subunit A	0.0827389	0.144022	0.184717		0.28026	0.219852	0.279684		3	0.137159	1.66097		3	0.259932	2.53077
P26443	Glud1	1.9e-20	61337.3	MOUSE	Glutamate dehydrogenase 1, mitochondrial	0.063404	-0.136934	0.106843		0.26893	0.259319	0.31764		3	0.0111041	0.348732		3	0.281963	2.69098
F8VPU2	Farp1	4.4e-26	118876	MOUSE	FERM, RhoGEF and pleckstrin domain-containing protein 1	-0.0357876	-0.178023	-0.0875202		-0.217541	-0.217318	-0.27639		3	-0.100444	1.16452		3	-0.237083	2.4684
Q9QYJ0	Dnaja2	4.7e-22	45746	MOUSE	DnaJ homolog subfamily A member 2	0.103174	-0.136119	-0.0425617		-0.0788054	0.0193066	-0.0807494		3	-0.0251689	0.424614		3	-0.0467494	0.834702
Q3TB24	Dnajb2	2.1e-15	35593.6	MOUSE	Putative uncharacterized protein	0.9221	0.431674	0.546079		0.856243	0.478542	5.43498		3	0.633285	1.59688		3	2.25659	0.835215
Q0P678	Zc3h18	5.1e-33	105695	MOUSE	Zinc finger CCCH domain-containing protein 18	0.190973	0.152914	0.0546918		0.175071	0.135284	0.272393		3	0.13286	1.38696		3	0.19425	1.68557
P53569	Cebpz	4.2e-21	120264	MOUSE	CCAAT/enhancer-binding protein zeta	0.02036	-0.402608	-0.284468		-0.80742	-0.649713	-0.427313		3	-0.222239	0.958958		3	-0.628149	1.83188
P53995	Anapc1	3.1e-15	215996	MOUSE	Anaphase-promoting complex subunit 1	-0.00201073	0.0484423	0.0504573		-0.0219106	0.122422	0.087349		3	0.0322963	0.998699		3	0.0626201	0.84416
P97351	Rps3a	5.8e-17	29885.1	MOUSE	40S ribosomal protein S3a	-0.154184	-0.164311	-0.0693717		-0.356036	-0.241538	-0.154771		3	-0.129289	1.60066		3	-0.250781	1.60208
Q3UM23	Rnh1	9.4e-21	49844	MOUSE	Putative uncharacterized protein	0.152425	0.170708	0.126674		0.335087	0.340699	0.301247		3	0.149936	2.445		3	0.325678	3.14616
O35639	Anxa3	8.3e-21	36384.4	MOUSE	Annexin A3	0.0713643	0.0136339	0.118783		0.286354	0.215902	0.246428		3	0.067927	1.11058		3	0.249561	2.48054
Q07076	Anxa7	1.2e-19	49925.7	MOUSE	Annexin A7	-0.0195625	-0.0251238	-0.00757907		0.214343	0.184715	0.146391		3	-0.0174218	1.40845		3	0.181816	2.24024
P97384	Anxa11	1.4e-18	54079.8	MOUSE	Annexin A11	0.109259	0.0850118	0.142399		0.369844	0.576276	0.141852		3	0.112223	1.97331		3	0.362657	1.29354
Q8R1F1	Fam129b	7.8e-17	84819.3	MOUSE	Niban-like protein 1	-0.148375	-0.148299	0.0158263		0.0678342	0.0946485	0.0279252		3	-0.0936158	0.94072		3	0.0634693	1.38736
Q6ZQK5	Acap2	5.4e-24	87211.6	MOUSE	Arf-GAP with coiled-coil, ANK repeat and PH domain-containing protein 2	0.0677442	-0.100476	0.0912784		0.171883	-0.0082156	0.136299		3	0.0195157	0.4105		3	0.0999885	0.976607
Q3UH98	Acap3	7.7e-19	92762.6	MOUSE	Putative uncharacterized protein	0.17842	0.145735	-0.340328		0.309178	0.225759	0.430329		3	-0.00539087	0.311011		3	0.321755	1.79021
O88532	Zfr	5.1e-20	116860	MOUSE	Zinc finger RNA-binding protein	-0.300096	-0.22245	-0.124336		-0.345357	-0.394487	-0.165921		3	-0.215627	1.59033		3	-0.301922	1.61022
Q7TMB8	Cyfip1	4.9e-18	145243	MOUSE	Cytoplasmic FMR1-interacting protein 1	-0.0253056	-0.00173035	0.050658		0.125263	0.25994	0.0626202		3	0.00787401	0.420634		3	0.149274	1.20642
Q61191	Hcfc1	3.6e-16	210439	MOUSE	Host cell factor 1	-0.00606388	-0.0070163	-0.0643583		-0.0594049	-0.481572	0.506909		3	-0.0258128	0.806304		3	-0.0113559	0.313377
G5E837	Hcfc2	3.8e-15	79435.6	MOUSE	Host cell factor 2	0.0097522	0.604001	-0.545624		0.0545941	0.0545034	0.0372546		3	0.0227099	0.32254		3	0.048784	2.165
P27659	Rpl3	1.2e-33	46110.3	MOUSE	60S ribosomal protein L3	-0.260464	-0.144093	-0.10431		-0.371677	-0.242278	-0.259521		3	-0.169622	1.4651		3	-0.291159	2.0254
Q76MZ3	Ppp2r1a	4.3e-26	65323.2	MOUSE	Serine/threonine-protein phosphatase 2A 65 kDa regulatory subunit A alpha isoform	-0.205121	-0.131406	-0.0466965		-0.129099	-0.0548246	-0.0471699		3	-0.127741	1.26768		3	-0.077031	1.3082
Q3TTF6	Ppp2r1b	9.1e-13	72743.7	MOUSE	Serine/threonine-protein phosphatase 2A 65 kDa regulatory subunit A beta isoform	-0.215723	0.322089	-0.225949		-0.106381	-0.118815	-0.099		3	-0.039861	0.373593		3	-0.108065	2.84616
Q3U8R9	Txnl1	5.1e-29	32179.6	MOUSE	Putative uncharacterized protein	-0.157667	-0.18029	-0.110373		-0.183673	-0.179496	-0.158037		3	-0.149443	2.03451		3	-0.173735	2.98239
P06151	Ldha	1.2e-17	36498.9	MOUSE	L-lactate dehydrogenase A chain	0.0688098	0.131574	0.0505552		0.0961062	0.158205	0.164459		3	0.0836464	1.41836		3	0.13959	1.92872
P16125	Ldhb	3.1e-14	36572.6	MOUSE	L-lactate dehydrogenase B chain		0.143688	0.172859		0.914176	1.08395	0.816314		2	0.158273	1.53386		3	0.938147	2.46383
Q3TRJ7	Sh3gl1	4.7e-21	41518.5	MOUSE	SH3-domain GRB2-like 1	0.0440139	0.0765969	0.00145029		0.0112676	-0.0391562	-0.223765		3	0.040687	0.994842		3	-0.0838847	0.743287
Q62420	Sh3gl2	1.8e-10	39955.7	MOUSE	Endophilin-A1					-2.03747		-1.56423		0	#DIV/0!	#DIV/0!		2	-1.80085	1.38105
E9PZP8	Herc1	1e-24	532664	MOUSE	Protein Herc1	0.0122667	0.0411981	-0.0214409		-0.0454268	-0.0606687	-0.169009		3	0.0106746	0.512082		3	-0.0917015	1.14723
Q3UDE2	Ttll12	9.8e-21	74043.9	MOUSE	Tubulin--tyrosine ligase-like protein 12	-0.154126	-0.215891	-0.0175204		-0.0629514	-0.107071	0.0388359		3	-0.129179	1.10142		3	-0.0437287	0.679866
Q3UHU8	Gtf2i	1.4e-21	108351	MOUSE	General transcription factor II-I	0.0346825	0.0325709	-0.0573536		-0.0461247	0.0412283	0.275326		3	0.00329997	0.335687		3	0.0901433	0.651002
P14685	Psmd3	2.4e-20	60718.8	MOUSE	26S proteasome non-ATPase regulatory subunit 3	0.0145655	0.0689319	-0.0634239		-0.0280499	-0.0201678	0.0282632		3	0.00669118	0.357662		3	-0.00665151	0.430688
Q8K327	Champ1	3.5e-19	87561.9	MOUSE	Chromosome alignment-maintaining phosphoprotein 1	-0.079447	0.0380717	-0.11097		-0.191388	-0.326991	-0.820993		3	-0.0507817	0.722132		3	-0.446457	1.1403
O54692	Zw10	1.2e-24	88063.6	MOUSE	Centromere/kinetochore protein zw10 homolog	0.0712976	-0.0639244	0.058369		0.115961	0.052155	0.151513		3	0.021914	0.480471		3	0.106543	1.47477
E9QAQ7	Arid1a	7.2e-23	242676	MOUSE	AT-rich interactive domain-containing protein 1A	-0.130381	-0.163081	-0.0342237		-0.241049	-0.438692	-0.461772		3	-0.109229	1.27645		3	-0.380504	1.79241
E9Q4N7	Arid1b	1.7e-15	237798	MOUSE	Protein Arid1b	0.0750072	0.398714	0.121107		-0.647277	-0.255587	-0.597108		3	0.198276	1.02483		3	-0.499991	1.55617
Q64337	Sqstm1	8.4e-33	48163.2	MOUSE	Sequestosome-1	-0.10399	-0.251468	-0.224956		-0.174207	-0.370862	-0.515727		3	-0.193471	1.59449		3	-0.353599	1.45478
Q6DFW4	Nop58	5.8e-26	60343.5	MOUSE	Nucleolar protein 58	-0.233745	-0.249145	-0.173174		-0.160871	-0.219225	-0.235522		3	-0.218688	2.25743		3	-0.205206	2.2227
Q03145	Epha2	3.8e-27	108853	MOUSE	Ephrin type-A receptor 2	-0.167388	-0.134812	0.0564029		0.0643206	-0.0556951	-0.151166		3	-0.0819324	0.743107		3	-0.0475136	0.580393
Q9EPE9	Atp13a1	2.7e-19	132389	MOUSE	Probable cation-transporting ATPase 13A1	-0.145134	-0.186431	-0.0804942		0.231368	0.284145	0.0440707		3	-0.137353	1.63021		3	0.186528	1.20545
Q8K363	Ddx18	2.1e-19	74181.5	MOUSE	ATP-dependent RNA helicase DDX18	-0.175732	0.273595	-0.279137		-0.495899	-0.70266	-0.496855		3	-0.0604246	0.422632		3	-0.565138	2.14016
Q921N6	Ddx27	5.8e-22	85939.5	MOUSE	Probable ATP-dependent RNA helicase DDX27	-0.338643	-0.536379	-0.273789		-0.699828	-0.574798	-0.697756		3	-0.382937	1.69901		3	-0.65746	2.70668
Q8BUK6	Hook3	1.1e-15	83218.6	MOUSE	Protein Hook homolog 3	-0.0471911	-0.0566339	0.0759278		0.07352	0.0987283	0.0100993		3	-0.00929905	0.372734		3	0.0607826	1.13193
Q8BMG7	Rab3gap2	2.7e-23	152536	MOUSE	Rab3 GTPase-activating protein non-catalytic subunit	0.178917	0.344747	0.0719407		0.399599	0.443901	0.274783		3	0.198535	1.18886		3	0.372761	2.04688
O54774	Ap3d1	3.9e-22	135082	MOUSE	AP-3 complex subunit delta-1	0.122892	0.143939	0.0479695		0.206979	0.17101	0.0634709		3	0.104933	1.46134		3	0.147153	1.41935
P83741	Wnk1	3.3e-23	250936	MOUSE	Serine/threonine-protein kinase WNK1	-0.255685	-0.115599	-0.115637		-0.0956239	-0.0413217	0.0434274		3	-0.162307	1.43348		3	-0.0311727	0.583697
Q56VR4	Wnk4	1.8e-18	93135.8	MOUSE	WNK4 protein kinase			-2.89116			2.92454			1	-2.89116	#DIV/0!		1	2.92454	#DIV/0!
Q3UPH7	Arhgef40	1.2e-15	165134	MOUSE	Rho guanine nucleotide exchange factor 40	0.161266	0.123906	-0.215165		0.224067	0.264108	0.256122		3	0.0233358	0.364777		3	0.248099	2.91664
O35350	Capn1	1.3e-20	82107	MOUSE	Calpain-1 catalytic subunit	0.152349	0.0825438	0.0952073		0.364259	0.440007	0.362042		3	0.110034	1.74434		3	0.38877	2.66584
Q6P8X1	Snx6	8.2e-23	46649.2	MOUSE	Sorting nexin-6	0.0871787	0.0318839	0.0317951		0.34659	0.185364	0.128109		3	0.0502859	1.2505		3	0.220021	1.40808
Q3TJN6	Snx5	3.6e-20	46798.7	MOUSE	Putative uncharacterized protein	0.113268	0.0525417	0.169172		0.170116	0.262332	0.16943		3	0.111661	1.39696		3	0.200626	1.94227
Q8BWW9	Pkn2	5.5e-17	111608	MOUSE	Serine/threonine-protein kinase N2	0.114153	0.226533	0.000883795		-0.187641	-0.0300642	-0.041467		3	0.113857	0.953518		3	-0.0863907	0.937981
Q810B6	Ankfy1	3.9e-26	128654	MOUSE	Ankyrin repeat and FYVE domain-containing protein 1	0.0374053	0.254778	0.0468458		0.0637547	0.196824	0.065188		3	0.11301	0.899368		3	0.108589	1.17737
P70268	Pkn1	2.9e-15	104412	MOUSE	Serine/threonine-protein kinase N1	-0.267542	0.208581	0.0760388		0.213435	0.310439	0.25703		3	0.00569285	0.313526		3	0.260302	2.24359
Q3UQS3	Pkn3	4.8e-08	83867.2	MOUSE	Putative uncharacterized protein					0.0175114				0	#DIV/0!	#DIV/0!		1	0.0175114	#DIV/0!
Q3UVI9	Abcf2	3.3e-20	71814.5	MOUSE	Putative uncharacterized protein	-0.188141	-0.194518	-0.0801092		-0.318307	-0.171206	-0.202921		3	-0.154256	1.57417		3	-0.230811	1.75064
Q80UJ7	Rab3gap1	4.8e-18	110198	MOUSE	Rab3 GTPase-activating protein catalytic subunit	0.38051	0.294568	0.215435		0.544777	0.593955	0.26237		3	0.296838	1.90605		3	0.467034	1.64195
Q5DTH1	Ube3a	8e-24	103344	MOUSE	MKIAA4216 protein (Fragment)	-0.157111	0.0875778	-0.0706604		-0.0451185	-0.110967	-0.12755		3	-0.0467311	0.536729		3	-0.0945454	1.49387
Q9D632	Bnip2	2.3e-11	39806.5	MOUSE	Putative uncharacterized protein		0.283397	0.0290545		-0.680561	-0.193542	0.204038		2	0.156226	0.662581		3	-0.223355	0.624664
Q8C1Z7	Bbs4	9.5e-17	58256	MOUSE	Bardet-Biedl syndrome 4 protein homolog			-0.813717		0.894518		-1.3199		1	-0.813717	#DIV/0!		2	-0.212689	0.356952
E9Q474	Akap13	4.8e-19	306008	MOUSE	Protein Akap13	0.17112	0.153505	-0.0261271		-0.153626	-0.0385611	-0.192666		3	0.0994995	0.894292		3	-0.128285	1.26306
Q02819	Nucb1	1.5e-15	53409.1	MOUSE	Nucleobindin-1	-0.159574	-0.211861	-0.0622888		-0.240189	-0.211978	-0.166392		3	-0.144575	1.39312		3	-0.206187	2.27171
P81117	Nucb2	1e-21	50304.9	MOUSE	Nucleobindin-2	0.300766	0.384625	0.356		0.493102	0.744967	0.48778		3	0.34713	2.60302		3	0.575283	1.97733
Q06185	Atp5i	5.7e-10	8235.7	MOUSE	ATP synthase subunit e, mitochondrial	-0.0929267	-0.0711708	-0.289812		-0.249817	0.165364			3	-0.151303	1.09274		2	-0.0422261	0.36039
Q8BFW7	Lpp	2.3e-20	65891.3	MOUSE	Lipoma-preferred partner homolog	0.202569	0.249035	0.0565974		-0.190727	-0.107173	-0.0320574		3	0.1694	1.30154		3	-0.109986	1.15976
F8VQ05	Fryl	1.3e-18	337822	MOUSE	Protein Fryl	0.0398004	0.0229532	-0.284178		-0.00559141	0.128676	-0.0647168		3	-0.0738083	0.556026		3	0.019456	0.416681
P50544	Acadvl	1.7e-19	70876.1	MOUSE	Very long-chain specific acyl-CoA dehydrogenase, mitochondrial	0.164905	0.327394	0.190512		0.562768	0.557443	0.519208		3	0.227604	1.64048		3	0.546473	3.50193
E9QB02	Mars	3.4e-14	102374	MOUSE	Methionine--tRNA ligase, cytoplasmic	-0.170391	-0.0921949	-0.0420081		0.00329888	-0.0131654	-0.0753287		3	-0.101531	1.24837		3	-0.0283984	0.747904
P61222	Abce1	7.8e-14	67315	MOUSE	ATP-binding cassette sub-family E member 1	-0.250436	-0.21436	-0.200655		-0.206989	-0.0706977	-0.165067		3	-0.221817	2.65269		3	-0.147585	1.47398
P60229	Eif3e	1.1e-17	52221.3	MOUSE	Eukaryotic translation initiation factor 3 subunit E	-0.192966	-0.218684	-0.0433131		-0.239026	-0.216993	-0.204302		3	-0.151654	1.26313		3	-0.220107	2.97524
Q8QZY1	Eif3l	2.4e-22	66613.5	MOUSE	Eukaryotic translation initiation factor 3 subunit L	-0.0764111	-0.149242	-0.0761076		-0.184768	-0.214811	-0.151219		3	-0.100587	1.57011		3	-0.1836	2.30717
Q9D7N3	Mrps9	1.1e-21	44929.8	MOUSE	28S ribosomal protein S9, mitochondrial	-0.198058	-0.442682	-0.026617		-0.303797	-0.203693	-0.225059		3	-0.222452	0.985666		3	-0.244183	2.11959
Q8C4J7	Tbl3	3.7e-19	88266.6	MOUSE	Transducin beta-like protein 3	-0.173967	-0.363149	-0.172939		-0.308068	-0.343168	-0.352715		3	-0.236685	1.49119		3	-0.33465	3.08588
Q543K9	Pnp	7.8e-22	32263.3	MOUSE	Purine nucleoside phosphorylase	0.045482	0.0289975	0.176677		0.377372	0.332475	0.363031		3	0.0837189	0.968528		3	0.357626	3.16504
Q9D8C9	Pnp2	8e-20	33888.2	MOUSE	Purine nucleoside phosphorylase						1.1255			0	#DIV/0!	#DIV/0!		1	1.1255	#DIV/0!
Q62384	Znf259	1.2e-21	50715.4	MOUSE	Zinc finger protein ZPR1	-0.195388	-0.166994			-0.043645	-0.0424156	-0.110495		2	-0.181191	1.60397		3	-0.0655185	1.29928
F8WIG4	Zfp259	1.2e-21	47509.9	MOUSE	Protein Zfp259			-0.0826217						1	-0.0826217	#DIV/0!		0	#DIV/0!	#DIV/0!
Q60520	Sin3a	2.6e-19	145089	MOUSE	Paired amphipathic helix protein Sin3a	-0.0333448	-0.00469396	-0.0804431		-0.147629	-0.0834149	-0.116726		3	-0.0394939	0.967396		3	-0.115923	1.90938
Q3TXW9	Sin3b	2.2e-16	126390	MOUSE	Putative uncharacterized protein	-1.07346	0.510613	0.144606		-0.0912886	1.19472	0.051368		3	-0.139413	0.398837		3	0.384934	0.653575
Q6NXJ0	Wwc2	1.3e-18	132621	MOUSE	Protein WWC2	-0.0650665	0.0136179	-0.094109		-0.154706	-0.0630053	-0.297048		3	-0.0485192	0.868653		3	-0.171586	1.19405
Q0KIX1	Wwc1	1.9e-15	123149	MOUSE	KIBRA	-0.336835		0.0551792		0.0680974	-0.0683034	-0.157287		2	-0.140828	0.520446		3	-0.0524976	0.595874
Q6GQT9	Nomo1	8e-22	133421	MOUSE	Nodal modulator 1	0.0246091	-0.225085	-0.0328515		0.198479	0.1454	0.0130085		3	-0.0777758	0.686958		3	0.118963	1.08698
Q6P5F9	Xpo1	1e-17	123094	MOUSE	Exportin-1	-0.0751656	-0.152114	-0.146215		-0.0306146	0.061371	-0.0829076		3	-0.124498	1.72989		3	-0.0173837	0.443597
Q3U7R1	Esyt1	1.9e-20	121555	MOUSE	Extended synaptotagmin-1	0.248614	0.101076	0.232606		0.655947	0.68083	0.458907		3	0.194099	1.5736		3	0.598562	2.17148
Q3TZZ7	Esyt2	1.1e-15	94140.1	MOUSE	Extended synaptotagmin-2	0.0597812	-0.0957563	0.113414		0.329363	0.487114	0.16344		3	0.0258129	0.443337		3	0.326639	1.43773
Q9CWV0	Malsu1	3.4e-12	26020.3	MOUSE	Mitochondrial assembly of ribosomal large subunit protein 1			-0.768767				0.508144		1	-0.768767	#DIV/0!		1	0.508144	#DIV/0!
E9QKS6	Sytl2	3.4e-12	142696	MOUSE	Synaptotagmin-like protein 2	-0.115967	-0.449213	0.281181		-0.470812		-0.289829		3	-0.0946661	0.457326		2	-0.38032	1.12869
Q8VE73	Cul7	9.9e-21	192294	MOUSE	Cullin-7	0.072357	0.0883349	-0.0141918		0.244679	0.509168	0.387435		3	0.0488334	0.877912		3	0.380427	1.7204
Q3UD58	Txlna	2.6e-21	62369.3	MOUSE	Taxilin alpha, isoform CRA_a	-0.172908	-0.101828	-0.0224791		-0.266867	-0.0818128	-0.125295		3	-0.0990719	1.12445		3	-0.157992	1.27738
Q8BHN1	Txlng	4.5e-25	60309	MOUSE	Gamma-taxilin	0.0651963	4.79161	-2.80067		-0.638503	-0.0576506	-0.202022		3	0.685377	0.405539		3	-0.299392	0.942079
Q5SXY1	Specc1	6.1e-18	118102	MOUSE	Cytospin-B	-0.0579104	-0.134883	0.0461895		-0.00106457	-0.144037	0.0245615		3	-0.048868	0.64785		3	-0.04018	0.58193
F8VQL9	Ncor2	4.4e-19	273411	MOUSE	Nuclear receptor corepressor 2	-0.136935	0.120459	-0.0330622		-0.204314	-0.118429	0.0107478		3	-0.0165129	0.373818		3	-0.103998	0.924403
Q5RIM6	Ncor1	3.2e-19	270789	MOUSE	Nuclear receptor co-repressor 1, isoform CRA_a	0.000674207	-0.145838	-0.0597749		-0.24065	-0.5085	-0.526288		3	-0.0683128	0.904314		3	-0.425146	1.65636
Q9DCL9	Paics	8.5e-25	47006.5	MOUSE	Multifunctional protein ADE2	-0.293081	-0.165203	-0.0056707		-0.120252	-0.229827	-0.143313		3	-0.154652	0.991552		3	-0.164464	1.71274
Q8CFX1	H6pd	1.1e-13	88928.5	MOUSE	GDH/6PGL endoplasmic bifunctional protein	-0.597342	-0.259932	0.108753		0.0366518	-0.557738			3	-0.249507	0.762366		2	-0.260543	0.567211
Q3UE92	Xpnpep1	1.6e-29	74560.5	MOUSE	X-prolyl aminopeptidase (Aminopeptidase P) 1, soluble, isoform CRA_b	0.0752945	0.0170745	0.0468882		0.342192	0.260374	0.156195		3	0.0464191	1.25997		3	0.25292	1.67342
E9Q286	BC018507	6.1e-15	242256	MOUSE	Protein BC018507	-0.15377	-0.181514	-0.124551		-0.297595	-2.23866	-1.05846		3	-0.153278	2.2473		3	-1.19824	1.07606
B9EKC3	Arhgap5	5.1e-47	172445	MOUSE	Rho GTPase activating protein 5	-0.19699	-0.191718	-0.101163		-0.401124	-0.368024	-0.594506		3	-0.16329	1.76428		3	-0.454551	1.93365
P70351	Ezh1	5.1e-47	85188.8	MOUSE	Histone-lysine N-methyltransferase EZH1	-0.070049		0.372004		-0.191162	-0.166547			2	0.150977	0.509698		2	-0.178855	1.66017
Q3TIA9	Asns	4.8e-24	64418.5	MOUSE	Asparagine synthetase	-0.0297258	-0.0175609	-0.0270366		-0.167562	-0.149768	-0.129899		3	-0.0247745	1.9693		3	-0.149077	2.57821
O35379	Abcc1	1.9e-27	171186	MOUSE	Multidrug resistance-associated protein 1	-0.336689	-0.41418	-0.172564		-0.0834519	-0.0950729	-0.28575		3	-0.307811	1.60558		3	-0.154758	1.148
Q640M1	Utp14a	2e-17	87266	MOUSE	U3 small nucleolar RNA-associated protein 14 homolog A	-0.245893	-0.176331	-0.23151		-0.596448	-0.629974	-0.480192		3	-0.217911	2.331		3	-0.568871	2.50138
Q6EJB6	Utp14b	1.9e-10	85928.6	MOUSE	U3 small nucleolar RNA-associated protein 14 homolog B			-1.0323		-1.29725	-1.44573	-1.88907		1	-1.0323	#DIV/0!		3	-1.54402	2.18715
Q02248	Ctnnb1	2.8e-20	85471.3	MOUSE	Catenin beta-1	0.0240283	0.190167	0.027545		0.199761	0.22002	0.142609		3	0.0805801	0.855012		3	0.187463	2.12656
Q02257	Jup	6.5e-16	81801.5	MOUSE	Junction plakoglobin	0.139081	-0.297527	0.11363		0.33981	0.101888	-0.0351469		3	-0.0149388	0.334631		3	0.135517	0.767538
Q3U3L3	Serpinb6a	2.7e-22	42569.3	MOUSE	Putative uncharacterized protein	0.350441	0.747811	0.0349842		0.29262	0.497163	0.447173		3	0.377745	0.981991		3	0.412319	1.96707
Q8BMA6	Srp68	5.7e-27	70574.8	MOUSE	Signal recognition particle subunit SRP68	0.0848058	0.162759	-0.0176637		-0.186442	-0.00403968	-0.152113		3	0.0766337	0.853727		3	-0.114198	1.05039
Q3THK3	Gtf2f1	4.2e-32	57241.7	MOUSE	General transcription factor IIF subunit 1	0.0401101	0.263366	-0.111075		-0.0672111	0.0849512	-0.25129		3	0.0641337	0.512056		3	-0.07785	0.595815
Q3UG25	Nfkb2	2.3e-21	96833.1	MOUSE	Putative uncharacterized protein	0.21445	0.375569	0.293072		0.633446	0.756729	0.434889		3	0.294364	1.91951		3	0.608355	1.94054
P15307	Rel	9.9e-14	64960.7	MOUSE	Proto-oncogene c-Rel	-0.0329509	0.0158081	0.0655946		0.180149	0.418427	0.30621		3	0.0161506	0.503445		3	0.301596	1.61681
Q6PGC1	Dhx29	3.5e-19	153977	MOUSE	ATP-dependent RNA helicase Dhx29	-0.125459	-0.00579599	-0.0804102		-0.0545121	0.000376209	-0.0533068		3	-0.0705551	1.04446		3	-0.0358143	1.03055
Q8R322	Gle1	9.9e-19	79575.1	MOUSE	Nucleoporin GLE1	-0.0575172	-0.0897464	0.0938927		0.0258946	0.0999305	0.653625		3	-0.0177903	0.407224		3	0.259817	0.795965
P17125	Tgfb3	4.4e-07	46885.1	MOUSE	Transforming growth factor beta-3						-0.61443			0	#DIV/0!	#DIV/0!		1	-0.61443	#DIV/0!
P18760	Cfl1	4.1e-19	18559.7	MOUSE	Cofilin-1	-0.0846285	-0.01911	-0.101983		-0.0637881	-0.0497987	-0.44454		3	-0.0685738	1.24821		3	-0.186042	0.843378
Q4FK36	Dstn	7.7e-18	18521.8	MOUSE	Destrin	0.263718	0.214118	0.185457		0.242518	0.268237	0.200407		3	0.221097	2.27894		3	0.237054	2.46319
P45591	Cfl2	3.9e-18	18709.7	MOUSE	Cofilin-2	0.103499	-0.0651357	-0.00457576		0.343297	0.124445	0.159299		3	0.0112624	0.376443		3	0.209014	1.34061
P43406	Itgav	3.3e-17	115361	MOUSE	Integrin alpha-V	-0.0455763	-0.0468189	0.104043		0.0236172	0.261148	-0.0110039		3	0.00388269	0.325478		3	0.0912539	0.701416
P25976	Ubtf	1.7e-35	89509.7	MOUSE	Nucleolar transcription factor 1	-0.180385	-0.29419	-0.167832		-0.569153	-0.432656	-0.34468		3	-0.214136	1.7764		3	-0.44883	1.98887
F8WHY8	Mta1	8.1e-23	79190.2	MOUSE	Metastasis-associated protein MTA1	-0.287733	0.428248	-0.0860835		-0.257305	-0.176055	0.0841924		3	0.018144	0.32794		3	-0.116389	0.726122
Q9R190	Mta2	1.4e-17	75030.7	MOUSE	Metastasis-associated protein MTA2	-0.064117	0.119864	-0.0767844		-0.113742	-0.198483	-0.179613		3	-0.00701263	0.336205		3	-0.163946	1.92667
Q3UII8	Mta3	2.8e-28	66310.9	MOUSE	Metastasis-associated protein MTA3	0.118905	-0.929603	-0.0143761		0.423198	-0.641162	0.408989		3	-0.275025	0.609267		3	0.0636751	0.359877
Q8C9S4	Otg1	1.4e-14	104902	MOUSE	Uncharacterized protein C10orf118 homolog	0.03978	0.126239	0.1608		0.368798	0.27897	-0.272092		3	0.10894	1.32787		3	0.125225	0.525969
Q9QZE5	Copg1	3e-17	97513.7	MOUSE	Coatomer subunit gamma-1	0.0836218	0.138572	0.0681786		0.212305	0.274288	0.102209		3	0.0967909	1.64385		3	0.196267	1.52371
Q9QXK3	Copg2	2.9e-15	97681.4	MOUSE	Coatomer subunit gamma-2	0.165005	0.174983	0.13638		0.0992096	0.560986	0.160518		3	0.158789	2.57953		3	0.273571	1.00125
Q9R0Q7	Ptges3	2.4e-55	18721.6	MOUSE	Prostaglandin E synthase 3	0.0136691	-0.0144869	0.0102607		-0.0351916	-0.0377802	0.0772172		3	0.00314764	0.422123		3	0.00141511	0.312644
Q08943	Ssrp1	3.9e-31	80861.1	MOUSE	FACT complex subunit SSRP1	-0.0415033	-0.109062	0.0333555		-0.0960277	-0.00948082	-0.0890842		3	-0.0390699	0.655196		3	-0.0648642	1.14108
Q9Z1F9	Uba2	3.5e-19	70569.5	MOUSE	SUMO-activating enzyme subunit 2	0.0185824	0.881654	-0.146107		-0.210014	-0.0500676	-0.337379		3	0.251376	0.590989		3	-0.199153	1.15859
Q60598	Cttn	1.9e-16	61250.2	MOUSE	Src substrate cortactin	0.148577	1.17259	-0.165852		-0.163936	-0.0314525	-0.0680954		3	0.385106	0.656451		3	-0.0878281	1.10737
F8WHT3	Prrc2b	1.1e-22	243123	MOUSE	Protein PRRC2B	-0.0334612	0.47544	-0.453506		-0.323638	-0.171986	-0.404062		3	-0.00384243	0.305446		3	-0.299895	1.62151
Q62388	Atm	2.7e-21	349422	MOUSE	Serine-protein kinase ATM	0.231507	0.11306	-0.00104908		0.385784	0.75936	0.242306		3	0.114506	0.938908		3	0.462483	1.32144
Q9DBY8	Nvl	1.4e-16	94476.8	MOUSE	Nuclear valosin-containing protein-like	-0.36296	-0.392894	-0.238229		-0.599994	-0.50617	-0.516695		3	-0.331361	2.00386		3	-0.540953	2.82447
O54724	Ptrf	1.7e-20	43953.9	MOUSE	Polymerase I and transcript release factor	-0.228005	-0.0275909	-0.24684		-0.512965	-0.517647	-0.476174		3	-0.167479	1.15604		3	-0.502262	3.46788
Q3U7Z6	Pgam1	1.1e-22	28832.2	MOUSE	MCG113582	-0.0431075	-0.0237587	0.0618356		0.083898	0.331954	0.172814		3	-0.00167689	0.317291		3	0.196222	1.24469
Q6ZQ93	Usp34	1.5e-19	408218	MOUSE	Ubiquitin carboxyl-terminal hydrolase 34	0.0303786	0.153746	-0.100528		0.0865323	-0.30748	-0.465601		3	0.0278656	0.431343		3	-0.22885	0.826822
Q62018	Ctr9	1.2e-22	133409	MOUSE	RNA polymerase-associated protein CTR9 homolog	0.0141683	0.0767168	-0.0601388		0.0529891	0.0786417	0.229636		3	0.0102487	0.387328		3	0.120422	1.09564
Q5XJY5	Arcn1	8.1e-22	57229.9	MOUSE	Coatomer subunit delta	0.00783961	0.040238	0.0452781		0.136521	0.219445	0.0723972		3	0.0311186	1.23079		3	0.142788	1.40596
Q8BHK9	Ercc6l	1.5e-15	138856	MOUSE	DNA excision repair protein ERCC-6-like	-0.0701344	-0.0409842	0.0647382		-0.0742963	-0.0806227	-0.147193		3	-0.0154601	0.430505		3	-0.100704	1.60512
Q6ZQH8	Nup188	1.3e-21	196698	MOUSE	Nucleoporin NUP188 homolog	-0.118176	-0.366606	-0.0643324		-0.611445	-0.627055	-0.344099		3	-0.183038	1.02646		3	-0.527533	1.83879
Q99ME9	Gtpbp4	1.6e-22	74113.4	MOUSE	Nucleolar GTP-binding protein 1	-0.384742	-0.00396081	-0.250148		-0.545844	-0.397697	-0.508581		3	-0.212951	1.00811		3	-0.48404	2.37969
Q6Q899	Ddx58	1.7e-11	105976	MOUSE	Probable ATP-dependent RNA helicase DDX58	0.769131		0.717027		1.08976	1.31412	0.740747		2	0.743079	1.95253		3	1.04821	1.91357
P43247	Msh2	1e-21	104152	MOUSE	DNA mismatch repair protein Msh2	0.181439	0.236639	0.20904		0.379496	0.448401	0.24485		3	0.209039	2.54054		3	0.357582	1.87253
Q3UEB3	Puf60	3.5e-20	60249.4	MOUSE	Poly(U)-binding-splicing factor PUF60	-0.00502714	-0.120556	0.00115117		-0.225449	-0.269096	-0.0444871		3	-0.0414773	0.69397		3	-0.179677	1.21992
Q9WTP6	Ak2	1e-17	26469	MOUSE	Adenylate kinase 2, mitochondrial	-0.0912358	-0.228037	-0.035618		0.194303	0.120383	0.1398		3	-0.118297	1.05947		3	0.151495	1.98566
Q921F4	Hnrpll	2.1e-20	64125.4	MOUSE	Heterogeneous nuclear ribonucleoprotein L-like	-0.0965841	0.019748	-0.0951652		-0.171979	0.038331	-0.0735365		3	-0.0573337	0.861287		3	-0.0690615	0.728748
Q91WG2	Rabep2	2.7e-17	62132.9	MOUSE	Rab GTPase-binding effector protein 2	0.0607977	0.108818	0.187488		0.292775	0.207233	0.205783		3	0.119035	1.37544		3	0.235264	2.1362
Q3U574	Timeless	2.4e-20	137433	MOUSE	Putative uncharacterized protein	0.199423	0.20657	0.172495		0.168989	0.0511097	0.163741		3	0.192829	2.84133		3	0.127946	1.39979
D3YTT6	Osbpl3	2.1e-20	100498	MOUSE	Oxysterol-binding protein	-0.0436868	0.126754	0.0967876		0.121103	0.252805	0.0642385		3	0.0599516	0.730452		3	0.146049	1.2205
Q5DTM2	Osbpl6	1.3e-10	113374	MOUSE	Oxysterol-binding protein (Fragment)	0.340096	-0.278578			0.342435	1.23859			2	0.030759	0.329334		2	0.790513	0.784782
Q9JLV1	Bag3	6.4e-26	61860.7	MOUSE	BAG family molecular chaperone regulator 3	-0.0669759	0.0212217	-0.0609616		-0.0129609	0.108255	0.0833325		3	-0.0355719	0.772585		3	0.0595421	0.905749
A6ZI44	Aldoa	1.9e-18	45120.7	MOUSE	Fructose-bisphosphate aldolase	0.0600468	0.0443985	0.00111019		0.116721	-0.084924	0.124575		3	0.0351852	1.03616		3	0.0521239	0.579629
A6ZI47	Aldoart2	1.7e-13	39371.1	MOUSE	Fructose-bisphosphate aldolase	-0.167807	-0.550416	-0.208098			-0.0834468			3	-0.308774	1.20072		1	-0.0834468	#DIV/0!
Q05CL8	Larp7	7.3e-20	64802.8	MOUSE	La-related protein 7	-0.0520452	-0.0109631	-0.057971		0.0711664	0.100288	0.0491973		3	-0.0403265	1.25109		3	0.0735507	1.7193
Q3TN34	Micall2	4.7e-19	108289	MOUSE	JRAB	0.319628	0.343854	-0.110606		0.303331	0.452911	0.154324		3	0.184292	0.771868		3	0.303522	1.44346
Q8CG46	Smc5	2e-17	128814	MOUSE	Structural maintenance of chromosomes protein 5	-0.114527	-0.124079	-0.0274058		-0.29442	-0.143612	-0.0920365		3	-0.0886705	1.29158		3	-0.17669	1.29848
Q05920	Pc	1.5e-18	129686	MOUSE	Pyruvate carboxylase, mitochondrial	0.364218	0.469261	0.314872		0.836513	0.99982	0.511276		3	0.382784	2.15954		3	0.782536	1.79508
P24527	Lta4h	1.2e-20	69051.5	MOUSE	Leukotriene A-4 hydrolase	0.173765	0.184095	0.17341		0.394714	0.4279	0.394612		3	0.17709	3.7085		3	0.405742	3.42903
Q5SSW2	Psme4	1.2e-21	211199	MOUSE	Proteasome activator complex subunit 4	-0.528613	-0.0990783	-0.0633342		-0.157496	-0.0751024	-0.307313		3	-0.230342	0.880626		3	-0.17997	1.22941
Q3TIV6	Kars	3.1e-18	67840.3	MOUSE	Lysine--tRNA ligase	-0.0775035	0.0420991	-0.111987		0.0346889	0.0145545	-0.0112881		3	-0.0491304	0.695685		3	0.0126518	0.655549
P14576	Srp54	6.6e-26	55721.3	MOUSE	Signal recognition particle 54 kDa protein	-0.0636063	-0.130067	0.119013		-0.228793	-0.258295	-0.336016		3	-0.0248869	0.414534		3	-0.274368	2.17671
Q6P1B9	Bin1	2.3e-20	52764.5	MOUSE	Bin1 protein	-0.0346114	-0.102889	-0.0791366		-0.0637222	-0.259591	-0.102891		3	-0.0722123	1.4625		3	-0.142068	1.15221
B2RWS6	Ep300	1e-17	263764	MOUSE	Histone acetyltransferase p300	-0.107225	0.262259	-0.188588		-0.766213	-0.23264	-0.860361		3	-0.0111849	0.326481		3	-0.619738	1.36292
P45481	Crebbp	1.4e-18	265497	MOUSE	CREB-binding protein	-0.164408	-0.189206	-0.0665405		-0.610895	-0.518491	-0.118491		3	-0.140051	1.49056		3	-0.415959	1.2576
Q9EQQ9	Mgea5	3.2e-20	103163	MOUSE	Bifunctional protein NCOAT	0.331531	0.481173	0.169655		1.15241	0.957497	0.705291		3	0.327453	1.46937		3	0.9384	2.03395
Q3UNJ3	Fkbp10	4.9e-21	64641	MOUSE	Putative uncharacterized protein	-0.125697	-0.02797	-0.0294797		0.151609	0.0749142	0.0992793		3	-0.0610489	1.00095		3	0.108601	1.69072
Q9Z247	Fkbp9	4.5e-16	62996	MOUSE	Peptidyl-prolyl cis-trans isomerase FKBP9	-0.00368129	0.0762932	0.0142329		0.123308	-0.0598022	-0.0467963		3	0.0289483	0.751203		3	0.00556985	0.330971
P48036	Anxa5	3.2e-25	35752.7	MOUSE	Annexin A5	0.0281584	0.12959	0.12722		0.265209	0.429036	0.180632		3	0.0949897	1.28102		3	0.291626	1.54362
Q80T83	Vcpip1	7.4e-24	137271	MOUSE	MKIAA1850 protein (Fragment)	-0.0348422	0.0344063	-0.355036		0.166562	0.0837654	0.323298		3	-0.118491	0.670234		3	0.191208	1.24951
Q8C2E7	Kiaa0196	5.1e-16	134112	MOUSE	WASH complex subunit strumpellin	0.00897892	0.375902	0.0910957		0.202739	0.311613	0.121583		3	0.158659	0.83908		3	0.211978	1.51351
P17427	Ap2a2	1.1e-16	104017	MOUSE	AP-2 complex subunit alpha-2	-0.0191758	-0.04377	0.00993105		-0.0326131	0.151406	0.122745		3	-0.0176716	0.729462		3	0.0805125	0.832176
P17426	Ap2a1	8e-15	107665	MOUSE	AP-2 complex subunit alpha-1	-0.0109618	0.117237	-0.010014		0.297588	0.31441	0.278071		3	0.032087	0.576996		3	0.29669	3.20409
Q6ZQF0	Topbp1	3.6e-21	168862	MOUSE	DNA topoisomerase 2-binding protein 1	0.0922834	0.149272	0.11369		-0.0246698	0.0145371	0.156698		3	0.118415	2.01919		3	0.048855	0.630061
Q9CPY7	Lap3	3.4e-20	56141.8	MOUSE	Cytosol aminopeptidase	-0.24026	0.273243	-0.465297		-0.15194	-0.024786	-0.250773		3	-0.144105	0.539528		3	-0.1425	1.09361
P32067	Ssb	3.8e-21	47756.9	MOUSE	Lupus La protein homolog	0.074683	0.130714	-0.054265		-0.147406	-0.0423881	0.00730179		3	0.0503773	0.643268		3	-0.0608307	0.804321
O55028	Bckdk	1.3e-15	46587.9	MOUSE	[3-methyl-2-oxobutanoate dehydrogenase [lipoamide]] kinase, mitochondrial	0.00206542	0.00696074	0.0714257		0.057299	0.0653876	-0.0111513		3	0.0268173	0.753226		3	0.0371784	0.877222
Q8BK67	Rcc2	4.5e-34	55983.8	MOUSE	Protein RCC2	-0.192132	-0.255632	-0.0134487		-0.367197	-0.301564	-0.284843		3	-0.153738	1.0756		3	-0.317868	2.50911
Q9ET54	Palld	4e-17	152132	MOUSE	Palladin	0.0741217	0.0357565	0.0776046		-0.0509374	-0.22472	0.0344054		3	0.0624943	1.66686		3	-0.0804174	0.696654
Q80U72	Scrib	4.2e-24	174061	MOUSE	Protein scribble homolog	0.141911	0.566719	0.0402209		0.264273	0.240155	0.163055		3	0.249617	0.88323		3	0.222495	2.03844
Q3TMW1	Ccdc102a	6.8e-18	62624.5	MOUSE	Coiled-coil domain-containing protein 102A	-0.0456158	1.12854	0.106889		0.0528868	2.74382	0.0594925		3	0.396603	0.704978		3	0.952066	0.699779
Q571M3	Lrrc1	2.7e-18	68117.5	MOUSE	MKIAA4018 protein (Fragment)		-1.96776	0.514687		0.383671				2	-0.726536	0.479605		1	0.383671	#DIV/0!
P62334	Psmc6	2e-20	44173.4	MOUSE	26S protease regulatory subunit 10B	-0.234987	0.000840749	-0.119625		-0.0762157	-0.0755331	-0.0498983		3	-0.117924	0.948073		3	-0.0672157	2.0915
Q3TSY9	Eif4b	1.6e-21	68840.5	MOUSE	Putative uncharacterized protein	-0.226457	0.0929887	-0.09322		-0.565263	-0.478534	-0.589413		3	-0.0755629	0.601735		3	-0.544404	2.72101
Q9CSN1	Snw1	2.2e-21	61476	MOUSE	SNW domain-containing protein 1	-0.0929273	-0.0786619	-0.10547		-0.314488	-0.265925	-0.599371		3	-0.0923529	2.45855		3	-0.393262	1.49917
O70366	Trp53	2.2e-23	43430.8	MOUSE	Cellular tumor antigen p53	-0.0212995	-0.0665708	0.0226632		0.0340512	0.00166645	0.00775285		3	-0.0217357	0.612935		3	0.0144902	0.850548
Q5F2E8	Taok1	2.3e-15	116051	MOUSE	Serine/threonine-protein kinase TAO1	0.038917	-0.0362471	0.0240329		0.00605716	0.182809	0.00536531		3	0.00890096	0.43425		3	0.0647439	0.713123
Q8BYC6	Taok3	1.2e-12	105337	MOUSE	Serine/threonine-protein kinase TAO3	-0.451561	0.0676312	0.0839874		0.329925	-0.26162	0.542561		3	-0.0999809	0.503768		3	0.203622	0.613975
Q6ZQ29	Taok2	6.6e-14	139298	MOUSE	Serine/threonine-protein kinase TAO2	0.340763	-0.739949	0.0364639		0.290948	-1.02913	0.358755		3	-0.120907	0.42993		3	-0.126474	0.394801
P51432	Plcb3	5.8e-20	139488	MOUSE	1-phosphatidylinositol 4,5-bisphosphate phosphodiesterase beta-3	0.197057	0.158578	0.138794		0.414993	0.444633	0.245716		3	0.16481	2.27568		3	0.368448	1.86753
Q8BJW6	Eif2a	5.2e-20	64403.8	MOUSE	Eukaryotic translation initiation factor 2A	-0.158179	-0.0241479	-0.135354		-0.0639972	-0.180653	-0.109032		3	-0.105894	1.20461		3	-0.117894	1.43227
O35685	Nudc	4.2e-24	38358.3	MOUSE	Nuclear migration protein nudC	-0.0227353	-0.132411	0.0666949		0.00308767	-0.00157676	0.0850444		3	-0.0294837	0.481793		3	0.0288518	0.685206
Q571A2	Cul2	3.2e-20	87183.1	MOUSE	MKIAA4106 protein (Fragment)	-0.132324	-0.189461	0.00383542		-0.00480707	0.0843419	-0.0973278		3	-0.105983	0.987649		3	-0.00593099	0.337105
Q61210	Arhgef1	5.5e-20	102805	MOUSE	Rho guanine nucleotide exchange factor 1	0.0328104	0.225237	0.161354		0.214307	0.207859	0.240202		3	0.1398	1.18005		3	0.220789	3.00049
Q9JLC8	Sacs	3.9e-16	520689	MOUSE	Sacsin	-0.00241435	0.0352422	0.109698		-0.128972	0.140044	0.233852		3	0.0475086	0.844693		3	0.0816411	0.575879
Q5H8C4	Vps13a	1.2e-17	359404	MOUSE	Vacuolar protein sorting-associated protein 13A	0.0268245	-0.0504182	0.0489808		0.129139	-0.0576574	-0.19333		3	0.00846236	0.395133		3	-0.040616	0.452033
P06795	Abcb1b	3.7e-15	140995	MOUSE	Multidrug resistance protein 1B	-0.546775	-0.64287	-0.243354		-0.301591	-0.395748	-0.304382		3	-0.477666	1.53721		3	-0.333907	2.37304
Q9DC29	Abcb6	8.2e-17	93771.2	MOUSE	ATP-binding cassette sub-family B member 6, mitochondrial	0.208283	0.363165	0.205257		-0.118935	0.405424	-0.230972		3	0.258901	1.71846		3	0.0185055	0.330946
P21440	Abcb4	1.1e-14	140378	MOUSE	Multidrug resistance protein 3	-0.560529								1	-0.560529	#DIV/0!		0	#DIV/0!	#DIV/0!
P60122	Ruvbl1	9.2e-22	50214.4	MOUSE	RuvB-like 1	-0.126786	-0.0702592	-0.0823362		-0.140121	-0.441737	-0.0719787		3	-0.0931273	1.79031		3	-0.217946	1.01081
P63158	Hmgb1	7.2e-20	24894	MOUSE	High mobility group protein B1	-0.0775885	-0.0772787	0.0879452		-0.299767	-0.235614	-0.156539		3	-0.0223073	0.44075		3	-0.23064	1.81287
P30681	Hmgb2	9.2e-17	24162.1	MOUSE	High mobility group protein B2	-0.0745691	-0.0948198	0.0789552		0.0568483	0.0438336	-0.0314523		3	-0.0301446	0.496313		3	0.0230766	0.610827
Q9JJY4	Ddx20	6.2e-26	91711	MOUSE	Probable ATP-dependent RNA helicase DDX20	-0.196455	-0.232258	-0.165028		-0.219575	-0.278638	-0.113795		3	-0.197914	2.32363		3	-0.204003	1.58852
Q9DB05	Napa	3.5e-24	33190	MOUSE	Alpha-soluble NSF attachment protein	0.0163221	-0.0174618	0.14629		0.197672	0.190872	-0.0448852		3	0.0483836	0.662896		3	0.114553	0.842571
Q8BWY9	Kiaa1524	1.9e-15	102044	MOUSE	Protein CIP2A	-0.241491	-0.173676	-0.229159		-0.120838	-0.195634	-0.0718298		3	-0.214775	2.33264		3	-0.129434	1.45973
F8VPK0	Ttc37	6e-15	173944	MOUSE	Protein Ttc37	-0.0311892	-0.0578182	0.0693049		-0.0177796	0.0179226	0.237648		3	-0.0065675	0.356114		3	0.0792637	0.672095
Q8CIN4	Pak2	6e-19	57930.8	MOUSE	Serine/threonine-protein kinase PAK 2	-0.0986072	0.0697656	-0.0897364		0.169397	0.266679	0.044499		3	-0.039526	0.564602		3	0.160192	1.1859
G5E884	Pak1	1.6e-17	60608.4	MOUSE	Serine/threonine-protein kinase PAK 1	0.143716	0.335695	-0.0312794		-0.0374779	-0.111671	-0.256849		3	0.149377	0.832596		3	-0.135333	1.0694
Q61036	Pak3	1.2e-14	62398.2	MOUSE	Serine/threonine-protein kinase PAK 3	0.15035		0.102247		-0.459479		-0.0583218		2	0.126299	1.22258		2	-0.2589	0.67817
Q3TJL8	Pdia6	2.7e-18	48670.5	MOUSE	Putative uncharacterized protein	0.109163	0.0552652	0.193152		0.321048	0.0235702	0.162652		3	0.119194	1.31392		3	0.16909	1.02693
Q8C1B7	2025-09-11	5.6e-22	49695.1	MOUSE	Septin-11	-0.0198411	0.247643	-0.187464		-0.0240557	-0.243104	-0.204484		3	0.0134458	0.334808		3	-0.157215	1.1389
Q8CHH9	2025-09-08	1.1e-23	49812.8	MOUSE	Septin-8	0.406604	0.294059	0.210356		0.644834	0.583583	0.620008		3	0.303673	1.77843		3	0.616142	3.38072
Q3UUU4	2025-09-06	5.6e-22	48787	MOUSE	Putative uncharacterized protein			0.036332		0.286201	-0.0658239			1	0.036332	#DIV/0!		2	0.110188	0.492202
Q8C650	2025-09-10	9.3e-18	52422.6	MOUSE	Septin-10	0.224858	0.493663	0.207761		0.472131	0.524241	0.25792		3	0.30876	1.40145		3	0.418097	1.74531
Q6P9Q4	Fhod1	1.2e-26	129602	MOUSE	FH1/FH2 domain-containing protein 1	0.0572966	0.0745749	-0.0854524		0.191705	0.199737	0.102681		3	0.0154731	0.403904		3	0.164708	1.77144
Q66JR7	Pgm2	8.2e-20	64158.7	MOUSE	Pgm2 protein (Fragment)	0.282552	0.365555	0.252754		0.585468	0.438518	0.367916		3	0.300287	2.20772		3	0.463967	2.0328
P24270	Cat	2.1e-21	59795.8	MOUSE	Catalase	0.182322	0.197942	0.191753		0.323265	0.296871	0.254849		3	0.190672	3.54763		3	0.291662	2.63519
O88477	Igf2bp1	1.3e-21	63451.1	MOUSE	Insulin-like growth factor 2 mRNA-binding protein 1	-0.2322	-0.185516	-0.388784		-0.138025	0.0474629	-0.337791		3	-0.268833	1.61519		3	-0.142784	0.785263
A2AF47	Dock11	3e-20	237773	MOUSE	Dedicator of cytokinesis protein 11	0.0709251	0.188036	0.104747		-0.074048	0.0433994	0.0701443		3	0.121236	1.43518		3	0.0131652	0.401055
B2RY79	Dock9	9.6e-16	234889	MOUSE	Dock9 protein	-0.40917	-0.00996855	0.0107735		-0.26924	0.1591	-0.211895		3	-0.136122	0.673504		3	-0.107345	0.595323
Q8BGC0	Htatsf1	3.9e-20	86240.6	MOUSE	HIV Tat-specific factor 1 homolog	0.169456	0.32345	-0.195136		-0.192299	-0.110852	-0.17251		3	0.0992568	0.534052		3	-0.158553	1.9374
Q3URD3	Slmap	6.4e-20	96934.2	MOUSE	Sarcolemmal membrane-associated protein	0.140543	0.0442335	0.185197		0.416542	0.351257	0.134092		3	0.123324	1.31242		3	0.300631	1.44344
Q8BHG1	Nrd1	1.3e-22	132892	MOUSE	Nardilysin	0.0984364	0.11995	0.0281255		0.122182	0.033299	0.190743		3	0.0821706	1.31205		3	0.115408	1.19745
Q543H0	Srm	1e-19	33995.2	MOUSE	MCG16662	-0.224459	-0.239756	-0.154949		-0.30288	-0.283433	-0.405699		3	-0.206388	2.10752		3	-0.330671	2.19029
E9PVP1	Aim1	3.6e-18	184732	MOUSE	Protein Aim1	-0.11146	0.0169264	-0.296937		-0.667184	-0.69313	-0.699007		3	-0.13049	0.841027		3	-0.68644	3.99402
E9Q4K7	Kif13b	9.8e-20	204577	MOUSE	Protein Kif13b	0.221239	0.280897	0.0601003		0.386357	0.454302	0.0333423		3	0.187412	1.281		3	0.291334	1.11014
Q60575	Kif1b	1.3e-15	204083	MOUSE	Kinesin-like protein KIF1B	0.145951	0.716283	-0.0556274		0.0531556	0.336296	0.0099742		3	0.268869	0.739008		3	0.133142	0.79187
Q9EQW7	Kif13a	1.6e-16	195815	MOUSE	Kinesin-like protein KIF13A	-0.308016	0.0334273	0.161542		-0.19127	-0.64035	0.0107316		3	-0.0376819	0.390829		3	-0.273629	0.83725
Q8BJS4	Sun2	3.4e-24	81606	MOUSE	SUN domain-containing protein 2	0.168357	0.0699907	0.215628		0.558238	0.591322	0.291921		3	0.151325	1.44487		3	0.480494	1.73556
Q0VGY8	Tanc1	3.9e-18	200807	MOUSE	Protein TANC1	0.00774516	0.274813	0.12708		-0.393412	-0.0866621	-0.213595		3	0.136546	0.960335		3	-0.231223	1.21585
Q5SUH7	Clint1	9.9e-19	67731.4	MOUSE	Clathrin interactor 1	0.0383951	0.0739045	0.00778892		0.153264	0.0826484	0.0548602		3	0.0400295	1.06774		3	0.0969241	1.39549
G3UWZ0	Baz1a	1.5e-21	178169	MOUSE	Bromodomain adjacent to zinc finger domain protein 1A	-0.385527	-0.379875	-0.149957		-0.161803	-0.230542	-0.265213		3	-0.30512	1.53009		3	-0.219186	2.02958
B2RXQ2	Ppfia1	1.7e-16	142678	MOUSE	Ppfia1 protein	0.172292	0.0572758	0.164329		0.282457	0.015049	0.262144		3	0.131299	1.44771		3	0.18655	1.09108
B8QI35	Ppfia3	1.6e-08	133427	MOUSE	Liprin-alpha 3	-0.0394745					-0.111376			1	-0.0394745	#DIV/0!		1	-0.111376	#DIV/0!
P97868	Rbbp6	2.5e-20	199589	MOUSE	E3 ubiquitin-protein ligase RBBP6	0.077812	0.0556018	-0.0905138		-0.0719822	0.126707	0.332688		3	0.0143	0.391526		3	0.129138	0.716509
A5D6P2	Pard3	3.8e-16	149087	MOUSE	Par-3 (Partitioning defective 3) homolog (C. elegans)	-0.249693	-0.441165	-0.403879		-0.700768	-0.606017	-0.626411		3	-0.364912	1.90594		3	-0.644399	3.00206
Q810V0	Mphosph10	2.4e-25	78735.3	MOUSE	U3 small nucleolar ribonucleoprotein protein MPP10	-0.170877	-0.189155	0.0100949		-0.303131	-0.353693	-0.269749		3	-0.116646	0.982886		3	-0.308857	2.50977
Q3TS64	Rsl1d1	5.8e-17	50497.8	MOUSE	Putative uncharacterized protein	-0.13527	-0.0514453	-0.175203		-0.480753	-0.482345	-0.423606		3	-0.120639	1.39526		3	-0.462235	3.05988
E9QN31	Nop2	1.1e-24	86907.6	MOUSE	Putative ribosomal RNA methyltransferase NOP2	-0.253425	-0.315475	-0.307207		-0.465188	-0.443839	-0.447617		3	-0.292036	2.65684		3	-0.452215	3.97571
B2RQG2	Phf3	1.9e-18	225544	MOUSE	PHD finger protein 3	-0.0148593	0.00608418	-0.0914617		-0.464867	-0.314318	-0.124393		3	-0.0334122	0.724933		3	-0.301193	1.33545
Q61941	Nnt	1.5e-15	113839	MOUSE	NAD(P) transhydrogenase, mitochondrial	0.35628	0.228483	0.362882		0.837156	0.929893	0.638371		3	0.315882	2.03058		3	0.801807	2.24768
E9PVU0	Myo6	2.7e-18	146309	MOUSE	Unconventional myosin-VI	0.482606	0.666928	0.226587		0.756928	0.839727	0.521897		3	0.458707	1.45908		3	0.706184	2.0533
Q8CGC6	Rbm28	5.2e-18	84214.8	MOUSE	RNA-binding protein 28	-0.261591	-0.399533	-0.0947778		-0.515716	-0.524255	-0.620349		3	-0.251967	1.28561		3	-0.55344	2.73829
Q8CJG0	Eif2c2	8.8e-17	97305.1	MOUSE	Protein argonaute-2	-0.125739	-0.0506783	0.137112		-0.0630027	-0.0258619	0.0970286		3	-0.013102	0.355411		3	0.00272136	0.318651
Q8CJG1	Eif2c1	8.8e-17	97215.2	MOUSE	Protein argonaute-1							0.641747		0	#DIV/0!	#DIV/0!		1	0.641747	#DIV/0!
Q8CJF9	Eif2c3	8.8e-17	97278	MOUSE	Protein argonaute-3		0.538046			0.636871				1	0.538046	#DIV/0!		1	0.636871	#DIV/0!
Q3UIG8	Prmt1	4.7e-31	40522.8	MOUSE	Putative uncharacterized protein	-0.119017	-0.205956	-0.120998		-0.239579	-0.255816	-0.15628		3	-0.148657	1.75441		3	-0.217225	2.00976
Q6PAK3	Prmt8	8.8e-19	45276.6	MOUSE	Protein arginine N-methyltransferase 8					-0.214709				0	#DIV/0!	#DIV/0!		1	-0.214709	#DIV/0!
O35691	Pnn	3.9e-19	82436.3	MOUSE	Pinin	-0.011847	-0.0458225	-0.103316		-0.208039	-0.142214	-0.255297		3	-0.0536618	1.04068		3	-0.20185	1.89638
Q8C547	Heatr5b	1.1e-18	224322	MOUSE	HEAT repeat-containing protein 5B	0.0992088	0.180731	0.0320044		-0.131559	-0.133813	-0.815425		3	0.103981	1.165		3	-0.360266	0.895771
Q80X50	Ubap2l	5.1e-27	116800	MOUSE	Ubiquitin-associated protein 2-like	0.0591963	0.764152	-0.197284		-0.340064	-0.302846	-0.0594329		3	0.208688	0.566005		3	-0.234114	1.23283
Q6P1H6	Ankle2	1.1e-19	106199	MOUSE	Ankyrin repeat and LEM domain-containing protein 2	-0.197258	-0.0124721	-0.0318348		-0.548215	-0.395903	-0.1123		3	-0.0805216	0.819077		3	-0.35214	1.25872
Q8K2V1	Ppp4r1	5.8e-17	106299	MOUSE	Serine/threonine-protein phosphatase 4 regulatory subunit 1	0.0277297	0.473838	-0.00448318		-0.0918162	0.0366477	-0.0206757		3	0.165695	0.704008		3	-0.0252814	0.547873
Q61655	Ddx19a	4.3e-17	53933.5	MOUSE	ATP-dependent RNA helicase DDX19A	-0.0142005	0.126605	-4.40409		0.0919764	0.194683	-0.233238		3	-1.43056	0.659932		3	0.017807	0.345421
Q8R3C7	Ddx19b	1.7e-17	53894.3	MOUSE	DEAD (Asp-Glu-Ala-Asp) box polypeptide 19b			0.015144		0.111145				1	0.015144	#DIV/0!		1	0.111145	#DIV/0!
Q62240	Kdm5d	1.9e-11	177019	MOUSE	Lysine-specific demethylase 5D	-0.0320562	-0.0654941			-0.151632	2.0264	0.112173		2	-0.0487752	0.978341		3	0.662314	0.661216
Q9QY15	Ddx25	4e-09	54876.7	MOUSE	ATP-dependent RNA helicase DDX25			0.00806249				0.143438		1	0.00806249	#DIV/0!		1	0.143438	#DIV/0!
H7BWY4	Dlg1	8.1e-17	96892.6	MOUSE	Disks large homolog 1	0.0297688	0.072984	-0.0664227		-0.0540117	0.024493	0.245026		3	0.01211	0.399839		3	0.0718356	0.596489
P70175	Dlg3	3.6e-14	93483.2	MOUSE	Disks large homolog 3	-0.806575	-1.04872	0.0112571		0.321443	-0.747967	-0.00514813		3	-0.614678	1.0103		3	-0.143891	0.459749
Q91XM9	Dlg2	3.6e-14	94881	MOUSE	Disks large homolog 2			4.07692						1	4.07692	#DIV/0!		0	#DIV/0!	#DIV/0!
Q99KD5	Unc45a	6.9e-17	103448	MOUSE	Protein unc-45 homolog A	0.136356	0.164026	0.188935		0.181931	0.159752	0.131213		3	0.163106	2.36873		3	0.157632	2.36852
Q810A7	Ddx42	1.1e-19	101966	MOUSE	ATP-dependent RNA helicase DDX42	-0.151934	-0.030211	0.0172274		-0.0236051	-0.0846972	-0.0127433		3	-0.0549727	0.710956		3	-0.0403486	0.971864
Q8BWT1	Acaa2	2.3e-21	41830.2	MOUSE	3-ketoacyl-CoA thiolase, mitochondrial	0.21188	0.0866356	0.151302		0.361623	0.563827	0.351481		3	0.149939	1.57238		3	0.425643	1.89628
Q8VCY6	Utp6	1.6e-16	70430	MOUSE	U3 small nucleolar RNA-associated protein 6 homolog	-0.296954	-0.246772	-0.254048		-0.544218	-0.545574	-0.550722		3	-0.265925	2.76342		3	-0.546838	5.18306
Q6PDH0	Phldb1	1e-20	150072	MOUSE	Pleckstrin homology-like domain family B member 1	0.086917	-0.0145238	0.00241155		-0.0279777	-0.0522971	-0.819108		3	0.0249349	0.593388		3	-0.299794	0.735509
O88544	Cops4	1.2e-17	46285.2	MOUSE	COP9 signalosome complex subunit 4	-0.0346783	-0.0350595	-0.0731539		0.0861924	0.0299822	0.103784		3	-0.0476306	1.4889		3	0.0733195	1.39206
Q04735	Cdk16	5.8e-10	55914.4	MOUSE	Cyclin-dependent kinase 16	-0.229967	0.301033	-0.0139532		-0.0605113	-0.10484	0.0347565		3	0.0190377	0.340552		3	-0.0435316	0.697546
Q9R1T2	Sae1	3.1e-23	38620.4	MOUSE	SUMO-activating enzyme subunit 1	-0.0988697	0.0288947	-0.0659464		-0.265129	-0.319497	-0.139344		3	-0.0453071	0.746681		3	-0.241323	1.64245
Q3U0S4	Ctdp1	4.8e-19	104525	MOUSE	Putative uncharacterized protein	-0.0658511	0.0246444	-0.0966531		-0.30634	-0.226512	-0.454976		3	-0.0459533	0.777193		3	-0.329276	1.71071
Q9Z1Z2	Strap	8.9e-18	38442.6	MOUSE	Serine-threonine kinase receptor-associated protein	-0.229352	-0.293006	-0.034271		-0.311137	-0.335562	-0.21022		3	-0.185543	1.15501		3	-0.28564	2.0564
Q8C5X6	Fen1	7.1e-24	45820.1	MOUSE	Flap endonuclease 1	0.125306	0.0789001	0.0768445		0.279153	0.298024	0.253993		3	0.0936836	1.86393		3	0.277057	2.97627
P63085	Mapk1	2e-18	41276	MOUSE	Mitogen-activated protein kinase 1	-0.0483964	-0.0650861	0.0625729		0.115487	0.173454	0.0429562		3	-0.0169698	0.447897		3	0.110632	1.30375
Q63844	Mapk3	8.8e-17	43066.9	MOUSE	Mitogen-activated protein kinase 3	0.190679	0.384297	0.16102		0.292303	0.347192	0.26856		3	0.245332	1.4397		3	0.302685	2.5327
P05622	Pdgfrb	8.1e-13	122807	MOUSE	Platelet-derived growth factor receptor beta	0.973743	0.284026	0.3016		-0.793203	-0.662684	-0.435241		3	0.51979	1.1272		3	-0.630376	1.87875
Q61532	Mapk6	2e-12	82200.1	MOUSE	Mitogen-activated protein kinase 6		0.111296	1.48348		4.38475		-3.49851		2	0.797389	0.645577		2	0.443121	0.333141
P26618	Pdgfra	1e-09	122684	MOUSE	Platelet-derived growth factor receptor alpha		-0.808959					-4.18248		1	-0.808959	#DIV/0!		1	-4.18248	#DIV/0!
O54949	Nlk	1.3e-09	58313.4	MOUSE	Serine/threonine-protein kinase NLK	-1.89372		-6.09081				-9.50503		2	-3.99226	0.812341		1	-9.50503	#DIV/0!
P62702	Rps4x	1.7e-17	29598	MOUSE	40S ribosomal protein S4, X isoform	-0.245768	-0.256806	-0.132943		-0.262016	-0.134612	-0.230546		3	-0.211839	1.78021		3	-0.209058	1.79605
Q8R3C6	Rbm19	8.1e-19	106084	MOUSE	Probable RNA-binding protein 19	-0.245825	-0.394174	-0.302852		-0.73682	-0.665115	-0.6575		3	-0.314283	2.03672		3	-0.686479	3.17007
P59328	Wdhd1	2.4e-19	124256	MOUSE	WD repeat and HMG-box DNA-binding protein 1	0.0989269	-0.0399618	0.171818		0.161845	0.0319968	0.209533		3	0.0769278	0.768025		3	0.134458	1.19814
A2A6A1	Gpatch8	1e-24	164989	MOUSE	G patch domain-containing protein 8	-0.10754	-0.055746	-0.0613585		-0.201485	-0.0228228	0.0145391		3	-0.0748814	1.64958		3	-0.0699229	0.694367
Q3UGT5	Pygb	2.5e-14	96672.8	MOUSE	Phosphorylase	0.480765	0.550294	0.406436		0.874468	0.899768	0.657851		3	0.479165	2.43002		3	0.810696	2.35415
Q6PGF5	Bms1	1.3e-24	145415	MOUSE	BMS1 homolog, ribosome assembly protein (Yeast)	-0.113336	-0.241025	-0.155267		-0.468517	-0.509797	-0.395798		3	-0.169876	1.64197		3	-0.458037	2.58077
Q8VHE0	Sec63	1.8e-21	87870.7	MOUSE	Translocation protein SEC63 homolog	0.248658	-0.0380276	0.271235		0.106513	0.186845	0.0470288		3	0.160622	0.906676		3	0.113462	1.27026
Q3TWG5	Dync1li1	1.6e-19	56614.7	MOUSE	Dynein cytoplasmic 1 light intermediate chain 1	0.076143	0.0306975	0.00221483		0.291329	0.371374	0.152648		3	0.0363518	0.933016		3	0.271784	1.59287
Q6PDL0	Dync1li2	4.8e-20	54218.9	MOUSE	Cytoplasmic dynein 1 light intermediate chain 2	0.543191	0.609753	0.120115		0.228015	0.319942	0.190552		3	0.424353	1.26154		3	0.24617	1.92949
Q8BYA0	Tbcd	2.8e-18	133322	MOUSE	Tubulin-specific chaperone D	0.295016	0.446683	0.196723		0.384253	0.385056	0.282439		3	0.312807	1.60203		3	0.350583	2.3319
P17742	Ppia	2.6e-19	17971.5	MOUSE	Peptidyl-prolyl cis-trans isomerase A	0.0534832	0.0431089	0.127261		0.214973	0.230754	0.297051		3	0.0746178	1.27441		3	0.247593	2.29425
Q4G0C5	Ppih	4.4e-18	19208.3	MOUSE	Peptidyl-prolyl cis-trans isomerase	0.0760969	0.105753	0.231859		0.318471	0.274585	0.268627		3	0.137903	1.29284		3	0.287228	2.82675
Q9D0K2	Oxct1	6.9e-18	55989.1	MOUSE	Succinyl-CoA:3-ketoacid coenzyme A transferase 1, mitochondrial	0.214961	0.102641	0.184007		0.461329	0.416091	0.332875		3	0.167203	1.72278		3	0.403432	2.3674
Q3UFV9	Dnajc3	1.2e-20	57464.5	MOUSE	DnaJ (Hsp40) homolog, subfamily C, member 3	0.0627949	0.162124	0.209079		0.382208	0.346044	0.215669		3	0.144666	1.40602		3	0.31464	1.90523
Q8CC88	Vwa8	7.6e-19	213423	MOUSE	von Willebrand factor A domain-containing protein 8	0.116536	0.10059	0.161476		0.150319	0.181634	-0.0376898		3	0.126201	1.99499		3	0.0980876	0.840971
P37889	Fbln2	1.3e-21	131835	MOUSE	Fibulin-2	-0.00416342	-0.053394	-0.0249626		0.189859	-0.0330057	-0.451509		3	-0.0275067	1.01391		3	-0.0982185	0.485809
Q00612	G6pdx	2.8e-23	59263.1	MOUSE	Glucose-6-phosphate 1-dehydrogenase X	-0.0834545	-0.0397061	-0.0275585		0.0195554	0.0788502	0.108779		3	-0.0502397	1.31113		3	0.0690615	1.22568
P62204	Calm1	9.5e-26	16837.7	MOUSE	Calmodulin	0.113322	0.0983083	0.0804141		0.18901	0.123209	0.0901525		3	0.0973481	2.32732		3	0.134124	1.65894
Q56TS3	Espl1	3.9e-17	233201	MOUSE	Protein related to CUT1 and ESP1	0.608919	0.705472	0.153978		0.661623	0.878587	0.864891		3	0.489456	1.29042		3	0.8017	2.42195
Q3U0M8	Elac2	1.7e-16	92720.2	MOUSE	Putative uncharacterized protein	-0.332633	-0.213059	-0.12491		-0.238841	-0.336032	-0.0951453		3	-0.223534	1.48499		3	-0.223339	1.36797
Q3UPL0	Sec31a	1.7e-24	133570	MOUSE	Protein transport protein Sec31A	0.055052	0.144312	0.0197319		0.186666	0.394156	0.0504074		3	0.073032	1.02773		3	0.21041	1.07086
Q3USC0	Heatr3	1.1e-24	74290.1	MOUSE	Putative uncharacterized protein	-0.18316	0.124398	-0.257137		-0.185689	-0.408722	-0.168197		3	-0.105299	0.635908		3	-0.254203	1.38946
A2A5R2	Arfgef2	8.8e-19	202242	MOUSE	Brefeldin A-inhibited guanine nucleotide-exchange protein 2	-0.0535601	0.0661584	0.0568897		0.533821	0.474483	0.378673		3	0.0231627	0.517023		3	0.462326	2.32686
G3X9K3	Arfgef1	9.1e-18	208502	MOUSE	Brefeldin A-inhibited guanine nucleotide-exchange protein 1	-0.0417622	-0.146448	-0.0264279		-0.281638	-0.124651	0.17166		3	-0.071546	1.00383		3	-0.0782096	0.511581
Q91YM2	Arhgap35	5.2e-16	170394	MOUSE	Rho GTPase-activating protein 35	-0.17982	-0.0317123	-0.10131		-0.0727341	-0.355723	0.0914446		3	-0.104281	1.17058		3	-0.112337	0.619487
J3KMM1	Usp19	7.9e-19	146412	MOUSE	Ubiquitin carboxyl-terminal hydrolase	-0.0179486	0.0679965	0.116436		0.0411737	0.228788	-0.100992		3	0.0554945	0.83361		3	0.0563232	0.512086
B1AY13	Usp24	8.1e-18	294004	MOUSE	Ubiquitin carboxyl-terminal hydrolase 24	-0.184264	-0.165947	-0.0829168		-0.164132	-0.202385	-0.17889		3	-0.144376	1.66139		3	-0.181802	2.72904
Q5I0W0	Atp5f1	1.4e-15	28949.1	MOUSE	ATP synthase, H+ transporting, mitochondrial F0 complex, subunit b, isoform 1	-0.0325692	-0.21407	0.0380917		0.185911	0.274653	0.0895833		3	-0.0695158	0.645553		3	0.183383	1.42344
Q3TLE2	Fermt2	3.5e-20	77801.1	MOUSE	Pleckstrin homology domain containing, family C (With FERM domain) member 1	0.0899767	0.225463	0.100369		0.0772363	0.300956	0.104179		3	0.138603	1.36602		3	0.16079	1.12445
E9PYG6	Rasa1	2.5e-23	115430	MOUSE	Protein Rasa1	-0.0618443	0.109061	0.107159		-0.0876518	0.287959	-0.183888		3	0.0514587	0.638653		3	0.00547315	0.312862
Q9Z2I0	Letm1	3.2e-17	82989.3	MOUSE	LETM1 and EF-hand domain-containing protein 1, mitochondrial	0.314075	-0.111677	0.0632901		0.285512	0.453099	0.352081		3	0.0885625	0.562329		3	0.363564	2.05832
Q8BMS1	Hadha	1.1e-17	82670.6	MOUSE	Trifunctional enzyme subunit alpha, mitochondrial	0.18069	-0.129235	0.133748		0.332405	0.314921	0.198132		3	0.0617342	0.531918		3	0.281819	1.96572
Q5SX75	P4ha2	1.2e-19	61015.7	MOUSE	Procollagen-proline, 2-oxoglutarate 4-dioxygenase (Proline 4-hydroxylase), alpha II polypeptide, isoform CRA_f	0.195857	0.100755	0.181583		0.544808	0.564495	0.366601		3	0.159398	1.78493		3	0.491968	2.09755
Q6ZWX6	Eif2s1	1.9e-17	36108.5	MOUSE	Eukaryotic translation initiation factor 2 subunit 1	-0.188511	-0.209789	0.0125109		-0.0871272	-0.0228957	-0.0110462		3	-0.128596	0.97664		3	-0.0403564	0.939595
Q91V55	Rps5	7.7e-20	22876.6	MOUSE	40S ribosomal protein S5	-0.114449	-0.0592174	0.0476036		-0.297254	-0.204763	-0.292631		3	-0.0420209	0.628762		3	-0.264883	2.19861
Q9D0L8	Rnmt	9.1e-20	53291.8	MOUSE	mRNA cap guanine-N7 methyltransferase	-0.011202	0.285338	-0.0398315		0.0533454	-0.0162098	0.00950352		3	0.0781015	0.576085		3	0.0155464	0.581779
D3Z5I1	Zc3hav1	1.3e-18	112534	MOUSE	Zinc finger CCCH-type antiviral protein 1	0.0457151	-0.0704414	0.0634377		0.0593669	-0.20776	-0.209392		3	0.0129038	0.404705		3	-0.119262	0.804828
E9Q8I7	Nfxl1	5.2e-38	101509	MOUSE	Protein Nfxl1	0.0682583	-0.292295	-0.00164928		-0.0161452	-0.0982768	-0.0290628		3	-0.0752287	0.548287		3	-0.0478283	0.996718
Q8BH04	Pck2	1.9e-19	70528.6	MOUSE	Phosphoenolpyruvate carboxykinase [GTP], mitochondrial	0.24229	0.133721	0.217212		0.38214	0.409556	0.377597		3	0.197741	1.8785		3	0.389764	3.48461
Q9Z204	Hnrnpc	3.2e-20	34385	MOUSE	Heterogeneous nuclear ribonucleoproteins C1/C2	-0.307201	-0.2506	-0.0294965		-0.209862	-0.194876	-0.153933		3	-0.195766	1.13349		3	-0.186224	2.4001
Q8CGY8	Ogt	3.4e-15	116953	MOUSE	UDP-N-acetylglucosamine--peptide N-acetylglucosaminyltransferase 110 kDa subunit	-0.330726	-0.197573	-0.150212		-0.611527	-0.512497	-0.412172		3	-0.22617	1.5799		3	-0.512065	2.20774
E9Q411	Nbas	8.8e-20	265777	MOUSE	Protein Nbas	-0.0271352	-0.0926565	0.0204071		-0.0420493	-0.201346	0.00305039		3	-0.0331282	0.679298		3	-0.0801149	0.788544
P70698	Ctps1	3.6e-17	66683	MOUSE	CTP synthase 1	0.101496	0.0813386	-0.0301626		-0.0142824	0.131259	0.122809		3	0.0508907	0.769772		3	0.0799287	0.935078
P70303	Ctps2	5.9e-30	65515	MOUSE	CTP synthase 2	0.292437	0.634607	0.42188		0.477529	0.574784	0.880527		3	0.449642	1.63967		3	0.64428	1.77305
Q9JIG7	Ccdc22	1.2e-22	70844.1	MOUSE	Coiled-coil domain-containing protein 22	-0.0235859	0.0472654	0.0403774		0.0951296	0.21765	0.200963		3	0.0213523	0.653883		3	0.171247	1.63174
Q9JI11	Stk4	1.2e-23	55541.6	MOUSE	Serine/threonine-protein kinase 4	0.144179	0.154005	0.129025		0.432791	0.258103	0.364416		3	0.142403	2.88722		3	0.35177	1.99477
Q9JI10	Stk3	1.5e-21	56855.9	MOUSE	Serine/threonine-protein kinase 3	0.0263126	0.0315615	0.0287148		-0.220405	-0.134706	-0.050328		3	0.028863	2.86151		3	-0.135146	1.25756
Q8BKG3	Ptk7	1.2e-20	117533	MOUSE	Inactive tyrosine-protein kinase 7	-0.191708	0.132161	0.0768038		0.465428	0.411646	0.333963		3	0.00575229	0.319046		3	0.403679	2.35568
Q14AX6	Cdk12	7.3e-26	163683	MOUSE	Cyclin-dependent kinase 12	-0.0677035	-0.110697	-0.0475494		-0.286873	-0.226966	-0.294128		3	-0.0753167	1.55249		3	-0.269322	2.50961
Q69ZA1	Cdk13	1.6e-15	164554	MOUSE	Cyclin-dependent kinase 13	-0.0326097	0.125273	-0.14169		-0.4086	-0.295107	-0.0116203		3	-0.0163424	0.37033		3	-0.238443	1.04377
P11440	Cdk1	1e-15	34106.9	MOUSE	Cyclin-dependent kinase 1	-0.0732361	-0.000923864	-0.13004		0.0154952	-0.0396545	-0.0962659		3	-0.0680667	0.978665		3	-0.0401417	0.770229
Q99J95	Cdk9	1.8e-23	42762	MOUSE	Cyclin-dependent kinase 9	0.148578	0.293097	-0.00951961		-0.0071197	-0.188922	0.0793083		3	0.144052	0.918954		3	-0.038911	0.474135
P30285	Cdk4	3.8e-15	33751.2	MOUSE	Cyclin-dependent kinase 4	-0.243969	0.210189	0.00291022		-0.237492	-0.151484	-0.22781		3	-0.0102901	0.325756		3	-0.205595	2.06916
Q64261	Cdk6	5.3e-20	37028.7	MOUSE	Cyclin-dependent kinase 6	-0.255221	-0.275842	-0.379699		-0.345225	-0.386622	-0.347589		3	-0.303587	2.10459		3	-0.359812	3.15841
P97377	Cdk2	1.7e-15	38978.6	MOUSE	Cyclin-dependent kinase 2	0.0273802	0.0817329	0.237125		0.376378	0.3623	0.375733		3	0.115413	0.983583		3	0.37147	4.11752
P49615	Cdk5	8.9e-18	33288.8	MOUSE	Cyclin-dependent kinase 5	-2.7839	0.517621	0.40295		0.827436	0.879566	0.677712		3	-0.62111	0.505938		3	0.794904	2.54193
O35495	Cdk14	2.1e-12	52996.2	MOUSE	Cyclin-dependent kinase 14	-0.29311	-0.205503	-0.947815		-1.76619	-1.10932			3	-0.482143	1.05613		2	-1.43776	1.14577
Q8K0D0	Cdk17	1.1e-17	59506.6	MOUSE	Cyclin-dependent kinase 17			-0.105392		-0.435347		-0.102701		1	-0.105392	#DIV/0!		2	-0.269024	0.753853
Q04736	Yes1	7.2e-13	60630.6	MOUSE	Tyrosine-protein kinase Yes			-0.588334		-0.0708578	-0.179186	0.0526018		1	-0.588334	#DIV/0!		3	-0.065814	0.668282
B7ZWP2	Fgfr2	5.1e-15	84512.3	MOUSE	Fgfr2 protein			0.359575		-0.214335				1	0.359575	#DIV/0!		1	-0.214335	#DIV/0!
P39688	Fyn	3.1e-10	60675.4	MOUSE	Tyrosine-protein kinase Fyn	-1.53577	-0.0768478	0.356001		-0.441359	0.214167	0.307878		3	-0.418874	0.568362		3	0.0268953	0.337445
P16092	Fgfr1	3.4e-11	91981.8	MOUSE	Fibroblast growth factor receptor 1		4.20189			2.21062		0.0519476		1	4.20189	#DIV/0!		2	1.13129	0.61525
Q04899	Cdk18	5.8e-10	51848	MOUSE	Cyclin-dependent kinase 18					1.84696		-5.17594		0	#DIV/0!	#DIV/0!		2	-1.66449	0.444783
P08103	Hck	1e-08	59129.9	MOUSE	Tyrosine-protein kinase HCK					0.157977				0	#DIV/0!	#DIV/0!		1	0.157977	#DIV/0!
P16277	Blk	6.8e-11	56674.7	MOUSE	Tyrosine-protein kinase Blk					-0.187739				0	#DIV/0!	#DIV/0!		1	-0.187739	#DIV/0!
Q9JHU3	Cdk20	7.5e-06	38379.7	MOUSE	Cyclin-dependent kinase 20			0.0538603						1	0.0538603	#DIV/0!		0	#DIV/0!	#DIV/0!
Q61081	Cdc37	2.4e-21	44593.8	MOUSE	Hsp90 co-chaperone Cdc37	-0.0165569	0.0038483	-0.0439825		-0.0288606	-0.131402	0.00369805		3	-0.018897	0.815503		3	-0.052188	0.78468
Q8R2M2	Dnttip2	2.9e-29	84277.8	MOUSE	Deoxynucleotidyltransferase terminal-interacting protein 2	-0.11621	0.483018	-0.253274		-0.679184	-0.733383	-0.482486		3	0.0378447	0.355339		3	-0.631684	2.14723
Q9WVJ2	Psmd13	3.6e-17	42809.8	MOUSE	26S proteasome non-ATPase regulatory subunit 13	-0.038383	-0.101065	0.0180786		0.0651739	0.0443144	0.076217		3	-0.0404565	0.743877		3	0.0619018	1.95704
P97479	Myo7a	5.9e-24	254941	MOUSE	Unconventional myosin-VIIa	0.472533	0.781306	0.409711		0.77777	0.763591	0.360076		3	0.554517	1.6956		3	0.633812	1.66114
O88844	Idh1	2.7e-18	46674.9	MOUSE	Isocitrate dehydrogenase [NADP] cytoplasmic	0.165262	0.538591	0.196659		0.0694299	0.186672	0.199335		3	0.300171	1.19142		3	0.151812	1.47596
Q3U3Q3	Utp18	1.3e-21	61218.7	MOUSE	UTP18, small subunit (SSU) processome component, homolog (Yeast)	-0.0939066	-0.32701	-0.108216		-0.543653	-0.631384	-0.485919		3	-0.176378	1.14169		3	-0.553652	2.53883
Q60865	Caprin1	3e-24	78169.5	MOUSE	Caprin-1	-0.106088	-0.0982774	-0.101005		-0.491323	-0.427011	-0.0569196		3	-0.10179	3.59759		3	-0.325085	1.1602
Q3TS44	Psma1	1.6e-19	29546.8	MOUSE	Proteasome subunit alpha type	-0.0743028	-0.0503804	0.0704031		0.111369	0.163305	0.122667		3	-0.0180934	0.440508		3	0.132447	2.15858
Q3U5L3	Snx2	1e-18	58481.6	MOUSE	Putative uncharacterized protein	0.0917902	0.286345	-0.016788		0.212065	0.281953	0.0701961		3	0.120449	0.813498		3	0.188071	1.32592
Q6NZD2	Snx1	2.2e-15	58879.7	MOUSE	Sorting nexin 1	0.0349221	-0.0122198	0.0294318		0.251737	0.28395	0.198742		3	0.017378	0.740724		3	0.24481	2.29503
Q62448	Eif4g2	1.3e-17	102106	MOUSE	Eukaryotic translation initiation factor 4 gamma 2	-0.166805	-0.100783	-0.0758172		-0.231426	-0.31179	-0.240476		3	-0.114468	1.58597		3	-0.261231	2.33104
P47856	Gfpt1	1.5e-23	78539.8	MOUSE	Glutamine--fructose-6-phosphate aminotransferase [isomerizing] 1	0.058392	-0.0255628	0.101168		0.29497	0.409729	0.132487		3	0.0446659	0.753241		3	0.279062	1.432
Q5BKQ9	Psmd11	3e-20	47437.2	MOUSE	MCG19050, isoform CRA_d	0.02246	-0.108886	-0.0651541		-0.0612928	-0.0981239	-0.0789731		3	-0.0505268	0.794702		3	-0.0794633	2.05937
Q9CT36	Tpx2	6.6e-18	80091.5	MOUSE	Putative uncharacterized protein (Fragment)	0.388843	0.676644	0.370892		0.514183	0.568895	0.624945		3	0.478793	1.69637		3	0.569341	2.8042
O08795	Prkcsh	3e-24	58793.3	MOUSE	Glucosidase 2 subunit beta	0.0162001	0.060428	0.105986		0.374091	0.304808	0.237067		3	0.0608714	1.14467		3	0.305322	2.08689
Q3TE95	Rcn2	2.1e-23	41039.5	MOUSE	Putative uncharacterized protein	-0.0115577	0.126862	0.0833352		0.252186	0.27594	0.211142		3	0.0662132	0.909021		3	0.246423	2.53409
Q6PCN7	Hltf	3.1e-20	113318	MOUSE	Helicase-like transcription factor	0.161969	0.430546	0.0520902		-0.618384	-0.229987	-0.297949		3	0.214868	1.00856		3	-0.382107	1.36766
P47740	Aldh3a2	5.5e-15	53971.2	MOUSE	Fatty aldehyde dehydrogenase	0.133316	0.119282	-0.0246732		0.569463	0.266853	-0.309158		3	0.0759748	0.867596		3	0.175719	0.548456
Q8BX02	Kank2	6.6e-17	90246.2	MOUSE	KN motif and ankyrin repeat domain-containing protein 2	0.249427	0.30726	0.289681		0.0911676	0.0729241	0.220646		3	0.282123	2.73742		3	0.128246	1.259
Q6AXG6	Kank1	4.6e-11	130798	MOUSE	Kank1 protein			-0.361414		-1.37306				1	-0.361414	#DIV/0!		1	-1.37306	#DIV/0!
Q3TEE8	Txndc5	2.2e-22	46415.9	MOUSE	Putative uncharacterized protein	0.0401506	0.244206	0.291947		0.103957	0.126121	0.0603668		3	0.192101	1.18495		3	0.096815	1.72617
Q9EPU4	Cpsf1	9.8e-21	160820	MOUSE	Cleavage and polyadenylation specificity factor subunit 1	-0.186328	-0.192224	-0.00988483		-0.150093	-0.192135	-0.0167529		3	-0.129479	1.08923		3	-0.11966	1.1194
Q3UGW9	Prkci	2.6e-22	70767.3	MOUSE	Putative uncharacterized protein (Fragment)	-0.161414	-0.16414	0.0255974		-0.332672	-0.307871	-0.230723		3	-0.0999856	0.89905		3	-0.290422	2.26013
Q924W5	Smc6	4.3e-17	127199	MOUSE	Structural maintenance of chromosomes protein 6	-0.0494389	-0.00410469	0.137274		-0.170636	-0.444015	-0.0300221		3	0.0279102	0.475729		3	-0.214891	0.960425
O55222	Ilk	1.2e-15	51373.7	MOUSE	Integrin-linked protein kinase	0.0633009	0.0159528	0.176562		-0.016936	0.031461	-0.010058		3	0.0852719	0.967778		3	0.00148902	0.332305
Q6ZPZ3	Zc3h4	3.6e-31	140969	MOUSE	Zinc finger CCCH domain-containing protein 4	0.219885	0.160649	0.103467		0.0239741	0.0388325	-0.0269082		3	0.161334	1.69078		3	0.0119661	0.516563
O88967	Yme1l1	2.1e-20	80028.7	MOUSE	ATP-dependent zinc metalloprotease YME1L1	-0.236595	-0.222367	-0.0994828		-0.0948333	-0.0210546	-0.156757		3	-0.186148	1.59718		3	-0.0908818	1.13539
F8WI30	Snx7	2.3e-26	50879	MOUSE	Sorting nexin-7	0.0185601	0.194739	0.14285		-0.00753457	0.0714549	0.0808064		3	0.118716	1.12172		3	0.0482423	0.944527
Q6P9Q6	Fkbp15	9.9e-18	132962	MOUSE	FK506-binding protein 15	-0.0157847	0.250246	0.137972		0.466081	0.145021	0.433882		3	0.124145	0.905385		3	0.348328	1.41912
F8VQ87	Xrn1	1.8e-20	194760	MOUSE	5'-3' exoribonuclease 1	0.127756	-0.0783118	0.120364		0.200917	-0.0130468	0.166337		3	0.0566025	0.610905		3	0.118069	0.964657
P62821	Rab1A	9.5e-23	22678	MOUSE	Ras-related protein Rab-1A	0.0499224	0.172644	0.0600679		0.39141	0.122314	0.0294264		3	0.0942115	1.15848		3	0.18105	0.925815
Q0PD66	Rab1b	9.5e-23	22187.3	MOUSE	RAB1B, member RAS oncogene family, isoform CRA_c	0.00758843	0.0419261	0.0341136		0.134344	0.355625	0.20316		3	0.027876	1.23883		3	0.231043	1.44619
P61027	Rab10	3.6e-16	22541.1	MOUSE	Ras-related protein Rab-10	0.208665	-0.0962018	0.0187471		0.072936	0.131677	-0.0317844		3	0.0437366	0.474048		3	0.0576095	0.755211
P61028	Rab8b	1.4e-15	23603.3	MOUSE	Ras-related protein Rab-8B	-1.05599		-0.0749697		-0.151664	0.0843112	-0.418433		2	-0.565481	0.643134		3	-0.161929	0.720282
P55258	Rab8a	2.9e-14	23668.4	MOUSE	Ras-related protein Rab-8A	0.276526	0.621572	0.00166939		-0.0663386	0.26858	0.0813316		3	0.299923	0.927373		3	0.0945245	0.665313
Q6PHN9	Rab35	8.3e-23	23025.4	MOUSE	Ras-related protein Rab-35	0.0558412	-0.354003	0.0929091		0.0321524	0.206395	0.0921553		3	-0.0684176	0.468573		3	0.110234	1.08693
Q0PD42	Rab13	1.8e-09	22756.3	MOUSE	Rab13	0.297781	0.509507	-0.315062		0.72865		0.182522		3	0.164075	0.541216		2	0.455586	0.764793
Q0PD40	Rab15	1e-08	24318.7	MOUSE	Rab15					0.155382				0	#DIV/0!	#DIV/0!		1	0.155382	#DIV/0!
P51150	Rab7a	9.4e-18	23490	MOUSE	Ras-related protein Rab-7a	-0.204777	-0.683246	-0.0458209		0.0925392	0.0396784	-0.27022		3	-0.311281	0.910684		3	-0.0460007	0.44147
Q3UKP5	Xab2	3.1e-28	99905.3	MOUSE	Putative uncharacterized protein	-0.0965409	-0.113212	-0.0242627		-0.151067	-0.00886325	0.0450758		3	-0.0780053	1.285		3	-0.0382848	0.537575
Q3UH60	Dip2b	4.6e-16	171128	MOUSE	Disco-interacting protein 2 homolog B	-0.0922576	-0.00177957	0.0212565		-0.327499	-0.0631647	-0.187729		3	-0.0242602	0.555765		3	-0.192797	1.1955
Q3TK27	Gnl3	1.3e-17	60787	MOUSE	Putative uncharacterized protein	-0.235741	-0.282385	-0.336841		-0.875425	-0.942324	-0.830181		3	-0.284989	2.28629		3	-0.882643	3.16776
Q6PGG6	Gnl3l	4.5e-14	65195.5	MOUSE	Guanine nucleotide-binding protein-like 3-like protein	0.0140922	0.0701064	-0.0114938		0.105792	0.44912	-0.479786		3	0.0242349	0.677335		3	0.0250422	0.330293
Q8R146	Apeh	1.1e-22	81581.6	MOUSE	Acylamino-acid-releasing enzyme	0.23955	-0.0899731	0.332263		0.697313	0.460031	0.612969		3	0.160613	0.773839		3	0.590104	2.16852
Q5SV85	Synrg	3.1e-20	139617	MOUSE	Synergin gamma	0.22443	0.704248	-0.107249		0.162565	0.0480687	-0.171482		3	0.27381	0.738706		3	0.0130508	0.343779
Q3UM18	Lsg1	6.1e-17	73157.2	MOUSE	Large subunit GTPase 1 homolog	-0.0390881	0.0170562	-0.207203		-0.443303	-0.677295	-0.336733		3	-0.0764118	0.727724		3	-0.485777	1.69577
Q8VHK9	Dhx36	6e-24	113884	MOUSE	Probable ATP-dependent RNA helicase DHX36	-0.12025	-0.152099	-0.0917487		-0.130829	-0.0186532	0.0902755		3	-0.121366	1.99979		3	-0.0197357	0.405379
Q6P5D3	Dhx57	4.9e-20	155764	MOUSE	Putative ATP-dependent RNA helicase DHX57	-0.0137476	0.701037	0.596211		0.642134	0.713146	0.55115		3	0.427834	1.01128		3	0.635476	2.56874
Q505L1	Actl6a	8.4e-20	47448.4	MOUSE	Actin-like 6A, isoform CRA_a	-0.169196	-0.166125	-0.200915		-0.15982	-0.247789	-0.113088		3	-0.178745	2.71577		3	-0.173566	1.61926
Q3TQZ0	Wdr75	4.7e-18	93807.1	MOUSE	Putative uncharacterized protein (Fragment)	0.727867	-0.343075	-0.275898		-0.461295	-0.675961	-0.448012		3	0.036298	0.334376		3	-0.528423	2.02258
P60670	Nploc4	1.5e-17	68017.8	MOUSE	Nuclear protein localization protein 4 homolog	-0.00643503	-0.100715	0.0597693		0.0981075	0.171901	0.0972827		3	-0.0157934	0.416361		3	0.12243	1.71578
Q3UAG2	Pgd	3.4e-26	53246.7	MOUSE	6-phosphogluconate dehydrogenase, decarboxylating	0.179363	0.21898	0.165792		0.383627	0.34209	0.229604		3	0.188045	2.44836		3	0.318441	1.99476
B2RRE7	Otud4	1.1e-17	123056	MOUSE	OTU domain-containing protein 4	-0.113964	0.00397454	-0.219417		-0.0780935	-0.100215	0.0582557		3	-0.109802	0.937605		3	-0.0400176	0.59852
Q04692	Smarcad1	4.3e-20	116452	MOUSE	SWI/SNF-related matrix-associated actin-dependent regulator of chromatin subfamily A containing DEAD/H box 1	0.0449005	-0.0243988	0.0925037		-0.263686	-0.52862	-0.134011		3	0.0376685	0.71825		3	-0.308772	1.23245
Q9ESX5	Dkc1	7.3e-26	57402.1	MOUSE	H/ACA ribonucleoprotein complex subunit 4	-0.201479	-0.406191	-0.196082		-0.179963	-0.242433	-0.365326		3	-0.267917	1.51835		3	-0.262574	1.69452
Q80TY0	Fnbp1	2.5e-21	71344.4	MOUSE	Formin-binding protein 1	0.56171	0.30462	0.21491		0.320227	0.270699	0.325807		3	0.360413	1.4316		3	0.305578	2.78667
P97452	Bop1	1e-20	82546.3	MOUSE	Ribosome biogenesis protein BOP1	-0.320703	-0.384286	-0.194729		-0.442189	-0.520098	-0.366236		3	-0.299906	1.78509		3	-0.442841	2.30491
Q3TIS3	Sec23b	4.8e-20	86421.9	MOUSE	Putative uncharacterized protein	-0.0136238	-0.0327422	0.137597		0.0314143	0.0191719	0.0957849		3	0.0304103	0.502163		3	0.0487904	1.05445
Q01405	Sec23a	1.4e-22	86162.6	MOUSE	Protein transport protein Sec23A	0.135873	0.203527	0.0469507		0.235377	0.45797	0.0714363		3	0.128784	1.28061		3	0.254928	1.12314
P42208	2025-09-02	4.7e-26	41525.9	MOUSE	Septin-2	0.0299134	0.131389	0.0758282		0.133274	0.0825391	-0.0970894		3	0.0790436	1.24198		3	0.0395744	0.502885
Q8C156	Ncaph	2.5e-21	82303.3	MOUSE	Condensin complex subunit 2	0.0452776	0.00479976	-0.0910294		-0.278477	-0.0436684	-0.111289		3	-0.0136507	0.415838		3	-0.144478	1.05983
P13439	Umps	5.7e-21	52292.9	MOUSE	Uridine 5'-monophosphate synthase	-0.114449	-0.04713	-0.0443557		0.105649	0.100744	0.0457161		3	-0.0686451	1.32005		3	0.0840364	1.61532
Q8K2T8	Paf1	1.8e-25	60518.8	MOUSE	RNA polymerase II-associated factor 1 homolog	0.000122776	0.230342	-0.0370717		0.0819398	-0.0287351	0.0945443		3	0.0644644	0.583842		3	0.0492496	0.775359
Q8CI51	Pdlim5	3.2e-20	63299.8	MOUSE	PDZ and LIM domain protein 5	0.245837	0.317042	0.291879		0.225054	0.132784	0.0855819		3	0.284919	2.57582		3	0.147806	1.46257
P19324	Serpinh1	1.8e-24	46534	MOUSE	Serpin H1	0.12607	0.0375171	0.0444168		0.0171315	0.03295	0.046716		3	0.0693348	1.17075		3	0.0322658	1.49788
Q148V8	Fam83h	5.2e-18	131116	MOUSE	Protein FAM83H	-0.36879	-0.164699	-0.213743		0.0153616	-0.390839	0.0877377		3	-0.249077	1.5535		3	-0.0959131	0.533447
Q3UC82	Lig3	3e-24	112711	MOUSE	DNA ligase	-0.157531	-0.114751	-0.126358		-0.0267008	-0.0856603	0.0167884		3	-0.13288	2.34135		3	-0.0318576	0.703868
Q3TIT5	Psap	7e-23	61024.4	MOUSE	Putative uncharacterized protein	0.0419085	0.00993454	-0.090498		0.301876	-0.0430355	0.222576		3	-0.012885	0.410428		3	0.160472	0.879824
P28660	Nckap1	9.8e-20	128785	MOUSE	Nck-associated protein 1	-0.112373	-0.00359561	-0.132206		0.102137	0.241234	0.0731031		3	-0.0827248	1.05951		3	0.138825	1.23694
Q3UYV9	Ncbp1	1e-22	91927.5	MOUSE	Nuclear cap-binding protein subunit 1	-0.0608387	0.152252	-0.101317		-0.0390104	0.0912721	-0.0568893		3	-0.00330128	0.314109		3	-0.00154251	0.311292
Q80TH2	Erbb2ip	2e-20	157250	MOUSE	Protein LAP2	0.0520648	0.139553	0.019524		-0.514051	-0.432189	-0.280572		3	0.0703805	1.02567		3	-0.408937	1.87207
Q80TE7	Lrrc7	5e-14	166902	MOUSE	Leucine-rich repeat-containing protein 7					-0.574956				0	#DIV/0!	#DIV/0!		1	-0.574956	#DIV/0!
P42567	Eps15	4.4e-18	98471.8	MOUSE	Epidermal growth factor receptor substrate 15	0.0739758	0.0667546	0.0822733		0.224625	0.191072	0.251978		3	0.0743346	2.74255		3	0.222558	2.50834
O88487	Dync1i2	7.8e-21	68394.7	MOUSE	Cytoplasmic dynein 1 intermediate chain 2	0.109156	0.132736	0.184782		0.444569	0.357552	0.253458		3	0.142225	1.92449		3	0.35186	1.92493
Q8BT07	Cep55	4.1e-15	53930.8	MOUSE	Centrosomal protein of 55 kDa	-0.0217754	-0.0741486	-0.155891		0.256635	0.245294	0.116133		3	-0.0839383	1.08506		3	0.206021	1.65109
Q91YK2	Rrp1b	1.4e-15	80582.9	MOUSE	Ribosomal RNA processing protein 1 homolog B	-0.0976031	0.0563359	-0.140877		-0.1597	-0.328847	-0.209273		3	-0.0607148	0.680803		3	-0.232607	1.66194
Q4FZC9	Syne3	1.9e-17	112036	MOUSE	Nesprin-3	0.0391883	-0.232784	0.0744796		0.0259636	-0.0668479	-0.105676		3	-0.0397052	0.442391		3	-0.0488535	0.772836
Q3TFA9	Tmod3	1e-17	39473.1	MOUSE	Putative uncharacterized protein	0.121796	0.0565231	0.136427		0.137738	-0.0106118	0.236666		3	0.104915	1.59621		3	0.121264	0.93266
O70433	Fhl2	9.8e-27	32073	MOUSE	Four and a half LIM domains protein 2	-0.118481	0.708467	-0.152846		0.106161	0.0798004	0.13296		3	0.145713	0.483904		3	0.106307	1.99548
Q3TKZ9	Nolc1	3.4e-21	73570.2	MOUSE	Putative uncharacterized protein	0.27536	0.201428	-0.0953931		-0.162162	-0.14567	-0.293289		3	0.127132	0.723059		3	-0.200374	1.5998
Q6ZQ88	Kdm1a	3.6e-25	92851.4	MOUSE	Lysine-specific histone demethylase 1A	-0.00121702	0.447484	-0.0276531		-0.0347197	-0.165087	-0.548814		3	0.139538	0.637396		3	-0.24954	0.907954
Q14AX9	Mrc2	1.4e-23	167048	MOUSE	Mannose receptor, C type 2	0.0551242	0.437418	0.297148		0.65792	0.637641	0.442977		3	0.26323	1.14735		3	0.579513	2.16454
Q61194	Pik3c2a	6.8e-16	190760	MOUSE	Phosphatidylinositol 4-phosphate 3-kinase C2 domain-containing subunit alpha	-0.0473093	0.0414629	-0.055875		-0.12746	-0.0374625	-0.474632		3	-0.0205738	0.540249		3	-0.213185	0.901651
Q8K205	Pop1	9.5e-17	117368	MOUSE	Processing of 1, ribonuclease P/MRP family, (S. cerevisiae)	-0.452787	-0.584292	-0.35003		-0.765031	-0.871275	-0.540512		3	-0.462369	1.98235		3	-0.725606	2.05602
P17918	Pcna	3.2e-22	28785.1	MOUSE	Proliferating cell nuclear antigen	0.145546	0.203126	0.178209		0.315892	0.272489	0.313731		3	0.175627	2.35207		3	0.300704	2.959
E9Q9Z4	Tacc2	3.7e-29	123932	MOUSE	Transforming acidic coiled-coil-containing protein 2	-0.0827349	0.447348	-0.210462		-0.475996	-0.742419	-0.395158		3	0.0513836	0.385921		3	-0.537858	1.7447
Q6Y685	Tacc1	4.9e-21	83952.6	MOUSE	Transforming acidic coiled-coil-containing protein 1	0.26853	0.474288	-0.0847748		-0.426361	0.037753	0.108243		3	0.219348	0.807967		3	-0.0934549	0.499372
Q3TPZ5	Dctn2	2.6e-24	44117.2	MOUSE	Dynactin 2	-0.00627443	0.185199	-0.00277842		0.0888938	0.121715	-0.0310056		3	0.0587153	0.646614		3	0.0598676	0.787649
Q4G0C0	Sec23ip	1.1e-17	110752	MOUSE	Sec23 interacting protein	0.106676	0.0604338	0.109213		0.216368	0.304525	0.261006		3	0.0921073	1.84815		3	0.260633	2.32789
Q91VX2	Ubap2	2.5e-30	117967	MOUSE	Ubiquitin-associated protein 2	-0.0529667	0.48182	-0.138166		-0.397297	-0.164192	-0.388807		3	0.0968955	0.476886		3	-0.316765	1.57311
Q8CD92	Ttc27	1.5e-20	96431.5	MOUSE	Tetratricopeptide repeat protein 27	-0.0537392	-0.149046	-0.0291597		-0.178681	-0.129491	-0.226124		3	-0.0773151	1.07378		3	-0.178098	1.92686
P35821	Ptpn1	2.2e-18	49593.8	MOUSE	Tyrosine-protein phosphatase non-receptor type 1	0.0459744	-0.137391	0.0502094		0.240624	0.133687	0.060252		3	-0.0137358	0.374255		3	0.144854	1.26114
Q6PAC3	Dcaf13	1.3e-24	51456.7	MOUSE	DDB1- and CUL4-associated factor 13	-1.07934	-0.632904	-0.204831		-0.790124	-0.972817	-0.561819		3	-0.639025	1.19715		3	-0.77492	1.94428
Q8R3C0	Mcmbp	1.8e-23	72891.6	MOUSE	Mini-chromosome maintenance complex-binding protein	-0.113018	-0.0712973	-0.163514		-0.0701205	-0.0859216	-0.112315		3	-0.115943	1.61065		3	-0.0894523	2.03598
Q6PIP5	Nudcd1	1.5e-26	66705.5	MOUSE	NudC domain-containing protein 1	-0.08264	0.0764356	0.0260758		-0.127347	-0.13021	-0.0571972		3	0.0066238	0.346444		3	-0.104918	1.61908
Q9WUD1	Stub1	2e-20	34909.6	MOUSE	STIP1 homology and U box-containing protein 1	0.00239725	0.0332605	0.0877239		-0.022448	-0.0348894	0.00651677		3	0.0411272	0.919082		3	-0.0169402	0.82199
Q5RKP4	Rpn1	1.6e-19	68397.7	MOUSE	Rpn1 protein (Fragment)	0.0565732	-0.0589165	0.0808345		0.106743	0.236784	-0.00209929		3	0.0261637	0.518805		3	0.113809	0.918876
Q3U647	Papss1	1.8e-20	70794.8	MOUSE	3'-phosphoadenosine 5'-phosphosulfate synthase 1, isoform CRA_b	0.154644	0.298066	0.0882294		-0.191911	-0.0869217	0.035853		3	0.180313	1.29901		3	-0.0809931	0.765019
Q3TML6	Eif2s3x	5.5e-20	51065.9	MOUSE	Eukaryotic translation initiation factor 2, subunit 3, structural gene X-linked	-0.0344708	-0.148867	-0.198252		-0.10136	0.118992	0.117091		3	-0.127197	1.22244		3	0.0449077	0.521625
Q9Z0N2	Eif2s3y	9.7e-22	51131	MOUSE	Eukaryotic translation initiation factor 2 subunit 3, Y-linked	-0.237436	-0.341799	-0.634372		-1.42428	-0.219421	-0.662391		3	-0.404536	1.41747		3	-0.768696	1.09548
Q9DCN2	Cyb5r3	9.7e-25	34128	MOUSE	NADH-cytochrome b5 reductase 3	0.0456031	-0.0164408	0.226653		0.342723	0.401632	0.211793		3	0.0852718	0.741391		3	0.318716	1.82953
A3KGJ7	Cep250	8.5e-15	278973	MOUSE	Centrosome-associated protein CEP250	0.367182	0.158005	0.0723198		0.286238	0.308469	0.40736		3	0.199169	1.12266		3	0.334022	2.21489
Q3U6Q1	Wbp11	1.7e-29	69818	MOUSE	Putative uncharacterized protein	-0.0559012	0.0532552	-0.0918538		-0.065078	-0.173307	-0.388586		3	-0.0314999	0.564387		3	-0.20899	1.09957
Q543N5	Clic4	5e-25	28729.3	MOUSE	Clic4 protein	0.155456	0.240016	0.0568093		0.332108	0.386348	0.0753734		3	0.150761	1.28251		3	0.26461	1.25928
Q3TRK3	Dbn1	3.1e-21	72417	MOUSE	Putative uncharacterized protein	0.218769	0.2225	0.200688		0.310345	0.394432	0.332329		3	0.213985	3.3057		3	0.345702	2.57983
Q58E59	Sf3a3	3.3e-22	58842.4	MOUSE	Splicing factor 3a, subunit 3	-0.138508	-0.222724	0.00900843		-0.189849	-0.247091	-0.000153755		3	-0.117408	0.948627		3	-0.145698	1.02196
Q3UMB9	Kiaa1033	2e-20	136371	MOUSE	WASH complex subunit 7	0.0907418	0.0410533	0.0879758		0.282564	0.362087	0.295329		3	0.073257	1.64614		3	0.313327	2.51315
P35235	Ptpn11	4.5e-19	68460.9	MOUSE	Tyrosine-protein phosphatase non-receptor type 11	-0.143537	0.103456	0.0645338		0.249146	0.278324	0.222634		3	0.00815101	0.33487		3	0.250035	2.68702
P29351	Ptpn6	2.2e-14	67559.5	MOUSE	Tyrosine-protein phosphatase non-receptor type 6	0.593723	0.442461	0.133915		0.977323	0.881024	0.466052		3	0.390033	1.29152		3	0.7748	1.71415
D3YUS5	Rasal2	1.9e-22	142012	MOUSE	Protein Rasal2	-0.172502	-0.320934	-0.0992815		-0.396609	-0.045904	-2.83303		3	-0.197572	1.32868		3	-1.09185	0.770829
Q3U2G7	Dab2ip	1.9e-22	136884	MOUSE	Putative uncharacterized protein (Fragment)	-0.255466	2.80552	-1.68478		0.0742612	-0.651734	0.783581		3	0.288424	0.372732		3	0.0687029	0.354797
Q9EQG9	Col4a3bp	9.2e-22	71111.8	MOUSE	Collagen type IV alpha-3-binding protein	-0.101367	-0.134877	0.00818585		-0.120273	-0.0617718	-0.010739		3	-0.0760195	0.957576		3	-0.0642614	1.04725
Q62077	Plcg1	7.6e-18	149670	MOUSE	1-phosphatidylinositol 4,5-bisphosphate phosphodiesterase gamma-1	0.188132	0.0624233	0.104125		0.364593	0.406244	0.280518		3	0.118227	1.36943		3	0.350452	2.26161
P63154	Crnkl1	3.5e-17	83416.4	MOUSE	Crooked neck-like protein 1	0.171461	-0.0197487	0.0316743		-0.201791	-0.119236	-0.154112		3	0.0611288	0.702649		3	-0.15838	1.95721
Q63918	Sdpr	1.2e-28	46764.2	MOUSE	Serum deprivation-response protein	-0.246925	-0.0947796	-0.433943		-0.90395	-0.556052	-0.523285		3	-0.258549	1.22621		3	-0.661095	1.79175
P70699	Gaa	1.2e-19	106249	MOUSE	Lysosomal alpha-glucosidase	0.31978	0.253722	0.425675		0.778625	0.755724	0.586312		3	0.333059	1.96117		3	0.706887	2.43885
E9Q481	Smek1	9e-19	95315.1	MOUSE	Serine/threonine-protein phosphatase 4 regulatory subunit 3A	-0.286836	-0.16906	-0.21996		-0.10882	-0.322047	-0.284627		3	-0.225285	1.95553		3	-0.238498	1.46677
Q922R5	Smek2	2.3e-16	93935	MOUSE	Serine/threonine-protein phosphatase 4 regulatory subunit 3B	-0.125574	-0.160749	-0.0328686		-0.217284	-0.24754	-0.1268		3	-0.106397	1.26732		3	-0.197208	1.79313
Q99JX7	Nxf1	8.1e-25	70300.1	MOUSE	Nuclear RNA export factor 1	-0.0799052	-0.373359	-0.159904		-0.14711	0.00173114	-0.1181		3	-0.204389	1.14031		3	-0.0878262	1.01395
Q80UU6	Ogfr	1.9e-29	70663.8	MOUSE	Opioid growth factor receptor	0.203589	0.210189	-0.00568099		0.173156	0.264581	0.179074		3	0.136032	1.01107		3	0.205604	1.99952
Q3UJ70	Hmgcs1	2.6e-19	57497.4	MOUSE	Putative uncharacterized protein	-0.289251	-0.488211	-0.142366		-1.1977	-1.2605	-0.890337		3	-0.306609	1.33593		3	-1.11618	2.28666
Q99J77	Nans	4.3e-24	40024.5	MOUSE	N-acetylneuraminic acid synthase (Sialic acid synthase)	0.0826615	0.049214	0.171939		0.385771	0.476928	0.319005		3	0.101271	1.26079		3	0.393902	2.17934
Q3TQP7	Acat1	8.7e-26	44802.5	MOUSE	Putative uncharacterized protein	0.211451	0.139116	0.29215		0.598315	0.482459	0.535353		3	0.214239	1.69871		3	0.538709	2.7165
P28798	Grn	4.4e-44	63459.1	MOUSE	Granulins	0.247215	0.11994	0.331868		0.533271	0.707896	0.355046		3	0.233008	1.49959		3	0.532071	1.76007
A2ACV6	Soga1	2.2e-19	183146	MOUSE	Uncharacterized protein	-0.0383653	-0.232041	-0.172871		-0.452207	-0.306325	-0.999747		3	-0.147759	1.21039		3	-0.586093	1.26395
Q3UHU5	Soga2	5.1e-11	213864	MOUSE	Protein SOGA2	0.0232965	-0.731815	-0.256331		0.133655	0.0906779	0.129297		3	-0.321616	0.850903		3	0.117877	2.18178
Q8K4P0	Wdr33	2.4e-21	145268	MOUSE	pre-mRNA 3' end processing protein WDR33	0.0423828	0.0405141	-0.0182827		-0.466594	0.015318	0.113881		3	0.0215381	0.707094		3	-0.112465	0.526785
Q3TA88	Sh3kbp1	2.2e-18	73328.2	MOUSE	Putative uncharacterized protein	-0.0995525	0.0503686	-0.0870122		-0.139639	0.00567708	-0.143987		3	-0.0453987	0.653409		3	-0.0926498	0.999434
Q3U0K8	Ogfod1	7e-22	62734.9	MOUSE	2-oxoglutarate and iron-dependent oxygenase domain-containing protein 1	-0.138784	0.11886	0.0173372		0.0683295	0.151349	0.0967807		3	-0.000862155	0.304578		3	0.105486	1.6073
A2ASS6	Ttn	1.5e-13	3.90652e+06	MOUSE	Titin	-0.0642574	3.76232					0.0759294		2	1.84903	0.592718		1	0.0759294	#DIV/0!
Q3U6C7	Sucla2	2.6e-21	50626	MOUSE	Putative uncharacterized protein (Fragment)	-0.178743	-0.132837	0.0509028		0.080498	-0.0508235	0.0491354		3	-0.0868925	0.768046		3	0.02627	0.54115
F8VQC1	Srp72	2e-18	74657.8	MOUSE	Signal recognition particle subunit SRP72	-0.0698033	0.292179	-0.236747		-0.00548269	-0.0452038	-0.133578		3	-0.00479045	0.310555		3	-0.0614215	0.909797
Q3UHL0	Gtf3c1	2e-21	237423	MOUSE	Putative uncharacterized protein	-0.102112	-0.200263	-0.011666		-0.0868798	-0.00325282	-0.0104588		3	-0.10468	1.01208		3	-0.0335305	0.773683
Q6ZQ77	Hip1r	6.7e-16	120993	MOUSE	MKIAA0655 protein (Fragment)	0.0648876	0.178615	0.196626		0.476111	0.421532	0.464593		3	0.146709	1.45139		3	0.454079	3.17544
O89079	Cope	1.5e-20	34567.4	MOUSE	Coatomer subunit epsilon	0.00516261	0.0417068	0.166444		0.191768	0.258814	0.196571		3	0.0711045	0.849878		3	0.215718	2.30666
Q8K3D3	Swi5	3.7e-16	10260.7	MOUSE	DNA repair protein SWI5 homolog	-0.260605	-0.219524	-0.159201		0.0683743		-0.693629		3	-0.21311	2.03236		2	-0.312628	0.550867
O55106	Strn	1.6e-21	85966.5	MOUSE	Striatin	0.22055	0.239887	-0.211612		0.0707898	0.244511	-0.743336		3	0.0829417	0.501507		3	-0.142679	0.465038
B2RQS1	Strn3	2.1e-18	77732.6	MOUSE	Striatin-3	0.00188182	0.378829	0.0143445		0.0693336	0.108712	-0.422411		3	0.131685	0.700756		3	-0.0814551	0.468168
P58404	Strn4	2.2e-15	81645.7	MOUSE	Striatin-4	-0.43531	-1.30819	-0.0614335		-0.0567919	-2.43812	-0.171336		3	-0.601645	0.912013		3	-0.888749	0.732415
Q9JHP7	Kdelc1	2.9e-19	57985.8	MOUSE	KDEL motif-containing protein 1	-0.074864	-0.115554	0.030335		0.135255	0.00642245	0.0755739		3	-0.0533609	0.763898		3	0.0724171	1.01969
Q6P549	Inppl1	3.5e-20	138974	MOUSE	Phosphatidylinositol 3,4,5-trisphosphate 5-phosphatase 2	0.0584505	-0.00340236	0.109553		0.227919	-0.0799543	0.166821		3	0.0548671	0.930057		3	0.104929	0.720248
Q3UL31	Zc3h11a	4.5e-17	86492.5	MOUSE	Zinc finger CCCH type containing 11A	-0.128721	0.257069	-0.214062		0.313218	0.125282	-0.00434115		3	-0.0285713	0.365555		3	0.14472	0.891068
P51660	Hsd17b4	7e-18	79482.5	MOUSE	Peroxisomal multifunctional enzyme type 2	0.142844	0.0938558	0.186451		0.51836	0.548897	-0.139577		3	0.14105	1.76798		3	0.309227	0.820451
Q9Z130	Hnrpdl	6.3e-23	33559.1	MOUSE	Heterogeneous nuclear ribonucleoprotein D-like	-0.45025	-0.364777	-0.605766		-0.53735	-0.479884	-1.09723		3	-0.473598	1.96914		3	-0.704823	1.4562
Q60668	Hnrnpd	1.5e-20	38354.4	MOUSE	Heterogeneous nuclear ribonucleoprotein D0	-0.11531	-0.296148	-0.081218		-0.435155	-0.31361	-0.619876		3	-0.164225	1.17772		3	-0.456214	1.74422
Q544Z3	Hnrnpab	6.4e-18	30831.5	MOUSE	Heterogeneous nuclear ribonucleoprotein A/B, isoform CRA_c	-0.757579	0.0658173	-0.168454		-0.139868	-0.602602	-0.509846		3	-0.286738	0.741903		3	-0.417439	1.30948
Q543N3	Lasp1	3.7e-22	29994.7	MOUSE	LIM and SH3 protein 1, isoform CRA_b	0.0444634	0.211611	-0.278705		-0.0190837	0.0106547	-0.435546		3	-0.00754342	0.317421		3	-0.147992	0.685905
Q9DC07	Nebl	4.1e-14	31113.4	MOUSE	LIM zinc-binding domain-containing Nebulette	-0.213356		-0.194187		-0.346859	1.73226	2.88998		2	-0.203771	1.82503		3	1.42513	0.867651
Q8BHL5	Elmo2	1.1e-18	83887.3	MOUSE	Engulfment and cell motility protein 2	0.114707	0.282997	0.180813		0.341324	0.261717	0.211208		3	0.192839	1.53156		3	0.271416	2.0241
Q571D6	Elmo1	4.8e-09	85621.3	MOUSE	MKIAA0281 protein (Fragment)						-2.76692			0	#DIV/0!	#DIV/0!		1	-2.76692	#DIV/0!
P63330	Ppp2ca	7.6e-27	35608.5	MOUSE	Serine/threonine-protein phosphatase 2A catalytic subunit alpha isoform	1.18093	-0.191674	-0.0188568				-0.162103		3	0.323465	0.575311		1	-0.162103	#DIV/0!
P62715	Ppp2cb	7.6e-27	35575.4	MOUSE	Serine/threonine-protein phosphatase 2A catalytic subunit beta isoform	-0.10625	-0.0912556	-0.0492719		-0.0278705	-0.0297813	-0.00768485		3	-0.0822593	1.69479		3	-0.0217789	1.34121
P97470	Ppp4c	1.5e-15	35080.2	MOUSE	Serine/threonine-protein phosphatase 4 catalytic subunit	-0.345981	-0.170673	-0.129425		-0.12091	-0.21171	0.0499947		3	-0.21536	1.38028		3	-0.0942085	0.764018
Q3UAY3	Gtf3c4	6.1e-28	91594.8	MOUSE	Putative uncharacterized protein	0.00688993	0.202412	-0.136325		0.0630249	0.0995492	-0.0931959		3	0.0243258	0.383305		3	0.0231261	0.43571
Q9DBT5	Ampd2	1.2e-19	92024.7	MOUSE	AMP deaminase 2	-0.232571	0.0471641	-0.165251		-0.162467	0.0737974	-0.142638		3	-0.116886	0.824062		3	-0.0771027	0.682548
O08739	Ampd3	3.4e-14	88653.1	MOUSE	AMP deaminase 3	0.123116	0.491836			0.551415	0.855674	-0.143166		2	0.307476	0.764661		3	0.421307	0.838433
P97855	G3bp1	1.9e-20	51829.2	MOUSE	Ras GTPase-activating protein-binding protein 1	-0.126298	1.00992	-0.2926		-0.422148	-0.349448	-0.475557		3	0.197009	0.469937		3	-0.415718	2.41794
Q542W3	G3bp2	1.1e-18	50784.8	MOUSE	GTPase activating protein (SH3 domain) binding protein 2	-0.135989	0.178089	-0.0213181		-0.180966	-0.0157408	0.0323939		3	0.00692715	0.32482		3	-0.054771	0.614516
P47713	Pla2g4a	6.8e-23	85223.1	MOUSE	Cytosolic phospholipase A2	-0.0170417	0.0637158	-0.0226192		0.162411	0.37432	0.159198		3	0.00801828	0.397495		3	0.231977	1.38382
Q80UV9	Taf1	8.3e-25	214421	MOUSE	Transcription initiation factor TFIID subunit 1	0.0370676	-0.170688	-0.240016		-0.0572403	0.0150334	0.0824508		3	-0.124545	0.864406		3	0.0134147	0.413938
E9PWG2	Trappc8	1.5e-24	160912	MOUSE	Protein Trappc8	-0.257392	-0.353354	0.083173		0.0700323	0.122967	-0.0789921		3	-0.175858	0.802		3	0.0380025	0.52735
O08599	Stxbp1	1.5e-17	67569.3	MOUSE	Syntaxin-binding protein 1	0.294115	0.456174	0.388875		0.690656	0.720235	0.133139		3	0.379722	2.12551		3	0.514677	1.24223
Q9Z0R4	Itsn1	2.4e-19	194299	MOUSE	Intersectin-1	0.354596	-0.0622503	0.157864		0.387179	0.527376	0.302943		3	0.15007	0.771103		3	0.405833	1.90238
Q9Z0R6	Itsn2	3.5e-18	188909	MOUSE	Intersectin-2	-0.0184836	0.0332156	-0.143442		0.28581	0.314891	-0.12605		3	-0.0429032	0.602729		3	0.158217	0.718785
P63242	Eif5a	5.1e-25	16832.4	MOUSE	Eukaryotic translation initiation factor 5A-1	-0.145286	-0.237729	-0.100717		-0.259432	-0.195439	-0.352486		3	-0.161244	1.54296		3	-0.269119	1.86133
Q8BGY2	Eif5a2	5.1e-21	16793.4	MOUSE	Eukaryotic translation initiation factor 5A-2	0.000148649	0.503784	-0.232212		0.169817	0.863561	0.432422		3	0.0905734	0.445391		3	0.4886	1.1644
Q66JR8	Ptms	5.1e-25	23158.4	MOUSE	Ptms protein	0.154238	0.49091	0.0889314		0.0161181	0.0829808	0.0715762		3	0.244693	1.02597		3	0.0568917	1.25818
B2RY56	Rbm25	9.4e-23	99552.7	MOUSE	RNA-binding protein 25	-0.00781052	0.17125	0.0731225		-0.175135	-0.224508	-0.379853		3	0.078854	0.874244		3	-0.259832	1.58507
Q3TW96	Uap1l1	7.4e-21	56614.3	MOUSE	UDP-N-acetylhexosamine pyrophosphorylase-like protein 1	0.176832	0.307197	0.109149		0.295373	0.446634	0.150248		3	0.197726	1.41679		3	0.297418	1.43338
P62960	Ybx1	8.7e-24	35730.2	MOUSE	Nuclease-sensitive element-binding protein 1	-0.227589	0.662545	-0.30083		-1.22594	-1.38013	-0.857059		3	0.0447086	0.347546		3	-1.15438	2.05564
Q68G78	Ybx3	1.2e-20	31822.5	MOUSE	Csda protein	-0.212838	0.184604	-0.34443		-1.84218	-1.21809	-1.41751		3	-0.124221	0.587974		3	-1.4926	2.12892
Q64369	Igf2bp3	7e-20	29313.8	MOUSE	Y-box binding protein (Fragment)		1.46323							1	1.46323	#DIV/0!		0	#DIV/0!	#DIV/0!
Q9D5V6	Syap1	3.2e-18	41350.2	MOUSE	Synapse-associated protein 1	0.145817	0.353621	0.11874		0.404435	0.394877	0.104584		3	0.206059	1.26409		3	0.301299	1.33655
P52431	Pold1	1.9e-19	123792	MOUSE	DNA polymerase delta catalytic subunit	-0.0316436	-0.297258	-0.000422258		-0.0806224	0.0536532	-0.0811418		3	-0.109775	0.739971		3	-0.036037	0.596909
Q8VD04	Gripap1	4.6e-17	92715.8	MOUSE	GRIP1-associated protein 1	0.50078	0.170772	0.121333		0.229339	0.363547	0.349241		3	0.264295	1.10598		3	0.314042	2.04892
Q8K2P1	Lurap1l	1.5e-08	23728.5	MOUSE	Leucine rich adaptor protein 1-like	0.284183		0.145575						2	0.214879	1.003		0	#DIV/0!	#DIV/0!
P59997	Kdm2a	6.1e-22	132681	MOUSE	Lysine-specific demethylase 2A	0.0896647	-0.00242195	0.105634		0.345464	0.305194	0.420361		3	0.0642924	1.00781		3	0.357007	2.35579
Q3TVJ9	B3gnt2	4.1e-11	45883.4	MOUSE	UDP-GlcNAc:betaGal beta-1,3-N-acetylglucosaminyltransferase 2, isoform CRA_a	-1.17571	-0.883982	0.171413		0.225413	-1.21043			3	-0.629427	0.8797		2	-0.492511	0.510596
Q8C2T9	Ik	2e-22	65589.7	MOUSE	Putative uncharacterized protein	0.0941994	0.227872	-0.21136		-0.376796	-0.445372	-0.379742		3	0.0369039	0.396216		3	-0.400637	2.80869
Q922U1	Prpf3	9.4e-18	77455.5	MOUSE	U4/U6 small nuclear ribonucleoprotein Prp3	-0.0439318	0.389258	-0.234673		-0.285233	-0.154597	-0.0653096		3	0.0368847	0.366483		3	-0.16838	1.22638
Q9CXF4	Tbc1d15	3.5e-21	76527.8	MOUSE	TBC1 domain family member 15	0.0381335	0.189819	0.0897967		0.150071	0.134084	0.0324109		3	0.105916	1.15359		3	0.105522	1.28666
Q3U5C0	Tbc1d17	1.4e-10	72936.3	MOUSE	Putative uncharacterized protein	0.280953	-0.117416	0.309732		0.139361	1.50094	0.897348		3	0.157756	0.731762		3	0.845884	1.08399
Q8C854	Myef2	4.9e-27	63295.1	MOUSE	Myelin expression factor 2	-0.0157426	-0.283481	-0.0273244		0.258158	0.0903882	0.269525		3	-0.108849	0.770811		3	0.206024	1.45142
E9QAE4	Nsd1	4.4e-20	296367	MOUSE	Histone-lysine N-methyltransferase, H3 lysine-36 and H4 lysine-20-specific	-0.158396	-0.352652	-0.484462		-1.11382	-0.834722			3	-0.331837	1.43964		2	-0.974273	1.34404
P25444	Rps2	1.4e-32	31231.6	MOUSE	40S ribosomal protein S2	-0.208754	-0.312497	-0.153947		-0.342718	-0.208897	-0.959209		3	-0.225066	1.69769		3	-0.503608	1.09391
Q5D0E0	Ikbkb	1.2e-16	86787	MOUSE	Ikbkb protein	0.144882	0.572353	0.165381		0.510263	0.611476	0.365732		3	0.294205	1.07342		3	0.495824	1.99865
O09106	Hdac1	1.4e-21	55075.5	MOUSE	Histone deacetylase 1	0.110576	0.136476	0.0263861		0.309891	0.481531	0.272404		3	0.0911459	1.25494		3	0.354609	1.80391
P70288	Hdac2	6.1e-22	55302.6	MOUSE	Histone deacetylase 2	0.242143	-0.211922	0.07884		-0.00590224	-0.331429	-0.0713502		3	0.0363536	0.392576		3	-0.136227	0.817976
O70551	Srpk1	9.8e-19	73089.1	MOUSE	SRSF protein kinase 1	-0.0750244	-0.113609	-0.288168		-0.2238	-0.264518	-0.0336199		3	-0.158934	1.16664		3	-0.173979	1.17272
O54781	Srpk2	4.4e-15	76757.3	MOUSE	SRSF protein kinase 2	0.153649	0.298069	0.296199		0.381298	0.493817	0.141114		3	0.249305	1.75828		3	0.338743	1.38325
P42859	Htt	1.6e-24	344693	MOUSE	Huntingtin	0.031687	0.250129	0.00479667		0.253309	0.280823	0.121518		3	0.0955376	0.764722		3	0.21855	1.6284
Q3UHJ0	Aak1	4.4e-24	103347	MOUSE	AP2-associated protein kinase 1	-0.0036985	0.296199	-0.141991		0.151272	0.298574	-0.0357566		3	0.05017	0.434465		3	0.13803	0.838986
Q91Z96	Bmp2k	5.3e-15	126186	MOUSE	BMP-2-inducible protein kinase	0.191056	0.747895	-0.0786136		0.386095	0.343066	0.0116238		3	0.286779	0.74494		3	0.246928	1.06515
Q8BYR1	Lcmt2	1e-17	75295.8	MOUSE	Leucine carboxyl methyltransferase 2	-0.616126	-0.130973	-0.129935		-0.443759	-0.70064	0.601426		3	-0.292345	0.973263		3	-0.180991	0.45967
Q99JI4	Psmd6	3.2e-18	45536.8	MOUSE	26S proteasome non-ATPase regulatory subunit 6	-0.0124738	-0.149253	0.0972238		-0.0020002	-0.0742239	0.160852		3	-0.0215011	0.402612		3	0.0282092	0.441166
P35550	Fbl	4.3e-26	34307.1	MOUSE	rRNA 2'-O-methyltransferase fibrillarin	-0.149847	-0.237235	-0.100687		-0.292763	-0.319749	-0.142515		3	-0.162589	1.5579		3	-0.251676	1.64985
Q5M9L0	Eif3h	5.1e-24	39832.6	MOUSE	Eukaryotic translation initiation factor 3 subunit H	-0.131031	-0.257172	-0.0845211		-0.275586	-0.190691	-0.161452		3	-0.157575	1.33484		3	-0.209243	1.89057
Q3TJF2	Ola1	3.4e-17	44788	MOUSE	Putative uncharacterized protein	-0.127718	-0.305807	-0.128781		-0.21586	0.0119632	-0.0954852		3	-0.187435	1.36196		3	-0.0997939	0.871856
Q8CAV3	Nrf1	3.5e-10	56657.8	MOUSE	Putative uncharacterized protein (Fragment)	-0.362151	-0.0780373	0.488109		-0.110939	0.0759635			3	0.0159738	0.321095		2	-0.017488	0.355449
Q8VHY0	Cspg4	2.1e-18	252310	MOUSE	Chondroitin sulfate proteoglycan 4	0.272474	0.664187	1.17025		1.28432	1.02924	1.04018		3	0.702305	1.24421		3	1.11792	2.56053
E9PVA6	Git2	7.9e-27	84458.2	MOUSE	ARF GTPase-activating protein GIT2	0.299173	0.184391	0.0278389		0.285695	0.029849	0.127151		3	0.170468	1.09027		3	0.147565	1.03067
Q5F258	Git1	9.9e-25	84195.5	MOUSE	ARF GTPase-activating protein GIT1	0.240216	0.230393	0.0552855		0.319895	0.442922	0.243156		3	0.175298	1.30054		3	0.335324	1.84149
Q8CH18	Ccar1	3e-20	132061	MOUSE	Cell division cycle and apoptosis regulator protein 1	-0.0608747	0.0294805	0.0766663		0.227906	0.117095	0.233585		3	0.0150907	0.429257		3	0.192862	1.73814
P07607	Tyms	2.2e-25	34958.4	MOUSE	Thymidylate synthase	0.0287614	0.0312176	-0.021437		0.0139105	0.0309234	0.0836312		3	0.0128473	0.575073		3	0.0428217	1.05031
Q6NZN0	Rbm26	3.6e-15	114144	MOUSE	RNA-binding protein 26	-0.176959	-0.159648	-0.178367		-0.16568	-0.162246	-0.207243		3	-0.171658	3.21215		3	-0.17839	2.48766
Q5SFM8	Rbm27	1.2e-16	118553	MOUSE	RNA-binding protein 27	-0.267252	-0.229246	-0.0829369		-0.124391	0.000400546	-0.12448		3	-0.193145	1.42481		3	-0.0828233	1.03428
Q3UMC0	Spata5	7.3e-16	97256.6	MOUSE	Spermatogenesis-associated protein 5	-0.337343	-0.251823	-0.159873		-0.655712	-0.438916	-0.470053		3	-0.24968	1.70297		3	-0.521561	2.08558
Q3TTA7	Cblb	3.6e-08	109093	MOUSE	E3 ubiquitin-protein ligase CBL-B			0.160172		-2.19028	-0.140511			1	0.160172	#DIV/0!		2	-1.1654	0.639014
Q9D2L1	Arsk	4.2e-12	62801.3	MOUSE	Arylsulfatase K	0.294048		0.471408		0.752604		0.764188		2	0.382728	1.13981		2	0.758396	2.61424
Q5U469	Socs6	4.7e-09	51955.1	MOUSE	Socs6 protein	-0.718931		6.01392				12.628		2	2.64749	0.5408		1	12.628	#DIV/0!
A2A8L5	Ptprf	4.1e-23	211491	MOUSE	Receptor-type tyrosine-protein phosphatase F	-0.292651	-0.350022	0.00157755		-0.13515	-0.463204	-0.00912274		3	-0.213698	1.02517		3	-0.202492	0.864452
G3UY75	Ptprd	5.2e-16	211812	MOUSE	Receptor-type tyrosine-protein phosphatase delta	-0.15869	-0.545669	-1.89493				-2.8562		3	-0.86643	0.918253		1	-2.8562	#DIV/0!
Q3T992	Ubqln1	4.6e-20	58606	MOUSE	Putative uncharacterized protein	-0.255035	0.0472161	-0.436264		-0.0485694	-0.0948417	0.00468027		3	-0.214694	0.873985		3	-0.0462436	0.904772
Q9QZM0	Ubqln2	2.1e-17	67351.6	MOUSE	Ubiquilin-2	0.0394399	0.276517	-0.240936		-0.0937441	-0.363763	-0.0156441		3	0.0250072	0.355277		3	-0.157717	0.864195
Q99NB8	Ubqln4	2.1e-17	63506.4	MOUSE	Ubiquilin-4	-0.179242	0.17067	-0.718471		-0.0546607		-0.350256		3	-0.242348	0.650123		2	-0.202458	0.697404
Q3U6U7	Wars	4.7e-17	53641.6	MOUSE	Putative uncharacterized protein	-0.0658698	-0.0963068	-0.088372		0.0212812	0.00480921	0.0675871		3	-0.0835162	2.23267		3	0.0312258	0.923592
D3Z656	Synj1	6.9e-20	176334	MOUSE	Synaptojanin-1	0.241892	0.232438	0.126945		0.252871	0.631565	0.316226		3	0.200425	1.79362		3	0.400221	1.42027
Q99KG3	Rbm10	1.5e-24	103494	MOUSE	RNA-binding protein 10	0.0198442	0.0723998	-0.0338008		-0.519096	-0.200955	-0.139663		3	0.0194811	0.530066		3	-0.286572	1.17037
Q91YE7	Rbm5	7.5e-18	92311.7	MOUSE	RNA-binding protein 5	-0.139261	0.389489	0.0010852		-0.216107	-0.352679	-0.280164		3	0.0837712	0.488638		3	-0.282983	2.02489
G3UWA6	Slc3a2	2e-18	62240.2	MOUSE	4F2 cell-surface antigen heavy chain	-0.196901	-0.436483	-0.0820898		-0.190404	-0.0882319	-0.284428		3	-0.238491	1.1257		3	-0.187688	1.39636
Q9EQC5	Scyl1	6.4e-17	89160.5	MOUSE	N-terminal kinase-like protein	0.043369	-0.0030737	-0.00763921		0.0853561	0.103543	-0.0158606		3	0.0108854	0.542954		3	0.0576794	0.884975
P54071	Idh2	8.7e-20	50906.6	MOUSE	Isocitrate dehydrogenase [NADP], mitochondrial	0.242546	0.106951	0.292943		0.476603	0.343473	0.310404		3	0.214147	1.51461		3	0.376827	2.05334
B9EHN9	Zc3h13	3e-19	203828	MOUSE	Zinc finger CCCH type containing 13	0.122803	-0.269255	0.0245654		-0.258854	-0.462785	-0.160949		3	-0.0406287	0.418491		3	-0.294196	1.39546
P62908	Rps3	4.7e-27	26674.5	MOUSE	40S ribosomal protein S3	-0.239617	-0.285255	-0.0534056		-0.355385	-0.193722	-0.227198		3	-0.192759	1.24843		3	-0.258768	1.76463
Q78ZA7	Nap1l4	6.1e-24	42679.7	MOUSE	Nucleosome assembly protein 1-like 4	0.130358	0.0790135	0.0129096		0.0393027	0.195577	-0.400551		3	0.0740937	1.09391		3	-0.0552239	0.405472
P28656	Nap1l1	7.3e-27	45345.5	MOUSE	Nucleosome assembly protein 1-like 1			0.0140274				-0.199213		1	0.0140274	#DIV/0!		1	-0.199213	#DIV/0!
Q8C2D1	Hars	5.1e-19	57402.8	MOUSE	Putative uncharacterized protein	-0.132792	-0.0889197	-0.0725625		0.121578	0.13269	0.155782		3	-0.0980914	1.79589		3	0.136684	2.56959
Q99KK9	Hars2	1.8e-14	56985.9	MOUSE	Probable histidine--tRNA ligase, mitochondrial	0.206195	-0.0533047	0.327866		0.608986	0.296047	0.699054		3	0.160252	0.838553		3	0.534695	1.6161
Q3UJL0	Gnl2	4.3e-20	83327.1	MOUSE	Putative uncharacterized protein	-0.296157	-0.59062	-0.22484		-0.461368	-0.677746	-0.717136		3	-0.370539	1.39565		3	-0.61875	2.09383
E9Q634	Myo1e	1e-18	126819	MOUSE	Unconventional myosin-Ie	-0.0931135	-0.147342	-0.0229771		-0.0848416	0.064454	-0.368238		3	-0.0878109	1.17108		3	-0.129542	0.683303
P70248	Myo1f	1.4e-11	125948	MOUSE	Unconventional myosin-If		2.61342	-0.0901109						2	1.26166	0.583408		0	#DIV/0!	#DIV/0!
P11157	Rrm2	4.6e-18	45096.1	MOUSE	Ribonucleoside-diphosphate reductase subunit M2	0.423123	0.562511	0.343517		0.628863	0.481222	0.880904		3	0.44305	1.99494		3	0.663663	1.8305
Q6PEE3	Rrm2b	5.4e-12	40804	MOUSE	Ribonucleoside-diphosphate reductase subunit M2 B	0.675326	-0.366524	1.18702		0.867424		1.12125		3	0.498606	0.710807		2	0.994338	1.39351
Q62418	Dbnl	1.6e-19	48700	MOUSE	Drebrin-like protein	-0.0410074	-0.340799	-0.0325354		0.0970892	0.0650025	0.137527		3	-0.138114	0.81503		3	0.0998729	1.68387
P27641	Xrcc5	1.4e-22	83057.7	MOUSE	X-ray repair cross-complementing protein 5	0.023288	0.0464418	0.0723924		0.332371	0.361457	0.336972		3	0.0473741	1.40266		3	0.3436	3.4625
Q3UTU7	Ncapd3	6.6e-19	169392	MOUSE	Putative uncharacterized protein	0.190208	0.189244	0.24744		0.416492	0.361823	0.383291		3	0.208964	2.37825		3	0.387202	3.07509
Q8R5K4	Nol6	1.5e-17	129229	MOUSE	Nucleolar protein 6	-0.155456	-0.37472	-0.154185		-0.469453	-0.450356	-0.584675		3	-0.22812	1.34876		3	-0.501494	2.46055
Q52KI8	Srrm1	2.3e-19	106863	MOUSE	Serine/arginine repetitive matrix protein 1	-0.0577184	0.161637	-0.0418402		-0.066498	0.0670151	0.124917		3	0.0206928	0.399507		3	0.0418115	0.570658
Q99KE1	Me2	1.1e-18	65799.6	MOUSE	NAD-dependent malic enzyme, mitochondrial	-0.12543	-0.196169	-0.0459612		0.00929611	-0.0128527	0.0791731		3	-0.12252	1.27632		3	0.0252055	0.638906
Q8BMF3	Me3	7.7e-10	67099	MOUSE	NADP-dependent malic enzyme, mitochondrial							-1.19545		0	#DIV/0!	#DIV/0!		1	-1.19545	#DIV/0!
Q3TN31	Psma7	2.7e-111	27908.1	MOUSE	Proteasome subunit alpha type	-0.106718	-0.121779	-0.0233135		0.0435318	0.0343852	0.0577982		3	-0.0839369	1.2545		3	0.0452384	1.95992
Q9WUP7	Uchl5	1.3e-20	37617.2	MOUSE	Ubiquitin carboxyl-terminal hydrolase isozyme L5	-0.135097	-0.157384	-0.225845		0.0368436	-0.0303965	-0.158734		3	-0.172776	1.91946		3	-0.0507622	0.629309
Q3URU4	Mre11a	7.2e-18	80223.4	MOUSE	Meiotic recombination 11 homolog A (S. cerevisiae), isoform CRA_c	-0.0500863	-0.466798	-0.0782159		-0.076174	0.0908741	0.0363845		3	-0.198367	0.85681		3	0.0170282	0.418954
B1ARD6	Slfn9	9.6e-16	103993	MOUSE	Protein Slfn9	0.37331	0.377531	0.2382		0.36912	0.594741	0.196927		3	0.32968	2.02864		3	0.386929	1.40702
Q3TTV6	Tfip11	5.3e-18	96305.9	MOUSE	Tuftelin-interacting protein 11	0.164825	-0.0449104	0.00729569		-0.169846	0.153356	0.005018		3	0.0424034	0.544796		3	-0.00382413	0.313783
Q0VGB7	Ppp4r2	1.4e-25	46479.1	MOUSE	Serine/threonine-protein phosphatase 4 regulatory subunit 2	-0.0287826	-0.243968	-0.0775948		-0.191817	-0.305832	-0.217098		3	-0.116782	0.968886		3	-0.238249	1.99114
Q6PHP4	Znf512b	2.6e-16	96246.5	MOUSE	MCG140111, isoform CRA_c (Fragment)	0.372222	0.658821	0.766653		0.325657	0.2337	0.628815		3	0.599232	1.73898		3	0.396058	1.39752
Q8BI22	Cep128	8.1e-12	128504	MOUSE	Centrosomal protein of 128 kDa			0.639557		0.36266		0.434717		1	0.639557	#DIV/0!		2	0.398688	1.54232
Q6PDM2	Srsf1	1.4e-19	27744.8	MOUSE	Serine/arginine-rich splicing factor 1	-0.153195	-0.0894949	-0.0157195		-0.195805	-0.238083	-0.115459		3	-0.0861365	1.09049		3	-0.183116	1.73906
Q925I1	Atad3	3.7e-19	66742.5	MOUSE	ATPase family AAA domain-containing protein 3	-0.0825079	-0.321832	-0.0413198		0.103383	0.1668	0.0368033		3	-0.148553	0.936526		3	0.102329	1.25063
P32233	Drg1	7.8e-22	40512.5	MOUSE	Developmentally-regulated GTP-binding protein 1	-0.306056	-0.289815	-0.200641		-0.413844	-0.225036	-0.33957		3	-0.265504	2.12804		3	-0.32615	1.86648
Q9QXB9	Drg2	2.6e-14	40718.7	MOUSE	Developmentally-regulated GTP-binding protein 2	-0.116952	-0.20767	0.0256461		-0.2245	-0.159901	-0.144416		3	-0.0996586	0.854004		3	-0.176272	2.02659
P05202	Got2	1e-19	47411.8	MOUSE	Aspartate aminotransferase, mitochondrial	0.00496465	-0.237762	0.0324888		0.250913	0.238413	0.24047		3	-0.0667695	0.586551		3	0.243265	3.89798
Q3UJI2	Rbbp7	2e-36	47776.4	MOUSE	Putative uncharacterized protein	0.0667005	0.350748	0.138803		-0.0438024	-0.159338	-0.0119883		3	0.185417	1.09252		3	-0.0717096	0.902484
Q60972	Rbbp4	2.1e-18	47656.1	MOUSE	Histone-binding protein RBBP4	-0.0224105	-0.071765	0.0703948		-0.0197482	-0.0173256	-0.0272929		3	-0.00792687	0.363164		3	-0.0214556	2.02202
E9PUT4	Dlgap5	2.9e-18	84609.7	MOUSE	Disks large-associated protein 5	0.138189	0.496039	0.191707		0.407558	0.403889	0.398068		3	0.275312	1.18001		3	0.403172	4.62929
P35486	Pdha1	2.8e-21	43232.1	MOUSE	Pyruvate dehydrogenase E1 component subunit alpha, somatic form, mitochondrial	0.0592697	-0.0346321	0.0684809		0.260653	0.277387	0.210144		3	0.0310395	0.65214		3	0.249395	2.48788
Q8BGW1	Fto	3.1e-20	58007.4	MOUSE	Alpha-ketoglutarate-dependent dioxygenase FTO	-0.0220483	-0.0866629	0.0199356		-0.329696	-0.203737	-0.210005		3	-0.0295919	0.657018		3	-0.247813	1.88149
Q3U3T8	Wdr62	1e-19	167284	MOUSE	WD repeat-containing protein 62	0.419379	0.348378	0.253098		0.415396	0.587602	0.422363		3	0.340285	2.01196		3	0.47512	2.163
Q8VBZ3	Clptm1	3.1e-22	75291.3	MOUSE	Cleft lip and palate transmembrane protein 1 homolog	-0.00314447	-0.0694284	0.0082076		0.0583644	0.0832487	-0.0121628		3	-0.0214551	0.629865		3	0.0431501	0.869509
Q9Z179	Shcbp1	4.3e-22	75918	MOUSE	SHC SH2 domain-binding protein 1	0.0919142	0.0741154	0.143293		0.229155	0.178155	0.242695		3	0.103108	1.71945		3	0.216668	2.39125
O88291	Znf326	4.3e-29	65225.8	MOUSE	DBIRD complex subunit ZNF326	-0.101178	0.201857	-0.205393		-0.413762	-1.20428	-0.272998		3	-0.0349046	0.39689		3	-0.630345	1.09245
Q3UDJ2	Sgpl1	1.9e-23	63649.8	MOUSE	Putative uncharacterized protein	-0.018065	-0.146947	0.112716		0.145379	0.209338	-0.0257182		3	-0.0174319	0.377921		3	0.109666	0.888593
P62983	Rps27a	8.7e-46	17951.1	MOUSE	Ubiquitin-40S ribosomal protein S27a	-0.0191691	0.174525	-0.037807		-0.218861	-0.274489	-0.203807		3	0.0391829	0.507156		3	-0.232386	2.37429
Q70IV5	Synm	2.6e-16	173211	MOUSE	Synemin	0.549598	0.233545	0.277296		0.435763	0.421319	-0.111383		3	0.35348	1.45527		3	0.248566	0.821873
E9Q4Y4	Cep192	3.2e-18	276343	MOUSE	Protein Cep192	-0.267163	0.0241011	-0.16589		-0.587672	-0.143823	0.0521995		3	-0.136317	0.90067		3	-0.226432	0.751824
Q9JKX4	Aatf	7.1e-19	59482.6	MOUSE	Protein AATF	-0.147498	-0.0845739	-0.154111		-0.538284	-0.393641	-0.476163		3	-0.128727	1.84806		3	-0.469363	2.40492
Q80X82	Sympk	5.1e-16	142285	MOUSE	Symplekin	-0.00413119	0.549702	0.0231425		0.0196387	-0.0365583	0.0172209		3	0.189571	0.69548		3	0.000100439	0.302715
Q8BKS9	Kiaa0020	1.2e-18	72800.2	MOUSE	Pumilio domain-containing protein KIAA0020	-0.468952	-0.703301	-0.415416		-1.18812	-1.19127	-1.10435		3	-0.529223	1.87313		3	-1.16125	3.52268
Q8CFQ3	Aqr	1.6e-23	170295	MOUSE	Intron-binding protein aquarius	-0.0669901	-0.185113	0.00184725		-0.080985	-0.0232367	0.0360546		3	-0.0834186	0.876003		3	-0.0227224	0.544738
E9Q557	Dsp	7.2e-14	332915	MOUSE	Desmoplakin	-2.80614	-2.43716	-2.32711		-0.0251669	-3.91323	-2.30508		3	-2.52347	2.78526		3	-2.08116	0.986482
Q6QI06	Rictor	6.2e-30	191571	MOUSE	Rapamycin-insensitive companion of mTOR	0.287732	0.0282206	-0.215614		0.171228	-0.367773	-0.0646947		3	0.0334463	0.377074		3	-0.0870799	0.499729
Q3TWF6	Wdr70	7.6e-22	73119.5	MOUSE	WD repeat-containing protein 70	-0.0100551	-0.066509	0.0954164		-0.329353	-0.104639	-0.189142		3	0.00628412	0.343535		3	-0.207712	1.36264
P47738	Aldh2	1.4e-18	56538	MOUSE	Aldehyde dehydrogenase, mitochondrial	0.0865126	0.0307702	0.113393		0.539473	0.424511	0.408753		3	0.0768919	1.36037		3	0.457579	2.39743
Q9CZS1	Aldh1b1	4e-09	57553.4	MOUSE	Aldehyde dehydrogenase X, mitochondrial					0.516361				0	#DIV/0!	#DIV/0!		1	0.516361	#DIV/0!
Q3UYU2	Trmt2a	1.6e-18	67488.9	MOUSE	HpaII tinys locus 9c, isoform CRA_a	0.0588613	0.134894	-0.0916282		-0.162924	-0.204999	0.471286		3	0.0340425	0.481554		3	0.0344543	0.351975
Q8JZX4	Rbm17	6e-27	45304.2	MOUSE	Splicing factor 45	-0.140917	-0.159647	-0.0441839		-0.161759	-0.082142	-0.103729		3	-0.114916	1.37272		3	-0.115877	1.70328
Q543N7	Pacsin3	2.3e-24	48585.3	MOUSE	Protein kinase C and casein kinase substrate in neurons 3, isoform CRA_a	0.401134	0.130627	0.200081		0.455176	0.385062	0.102387		3	0.243947	1.32307		3	0.314208	1.29951
O70400	Pdlim1	4.5e-22	35774.7	MOUSE	PDZ and LIM domain protein 1	-0.0376586	0.697339	-0.0648535		-0.0639404	-0.083945	0.113335		3	0.198276	0.593165		3	-0.0115168	0.36092
Q3UF16	P4ha1	1.6e-18	63809.9	MOUSE	Putative uncharacterized protein	0.135083	0.238665	0.169448		0.419954	0.403804	0.133222		3	0.181065	1.8672		3	0.318993	1.42308
Q8K368	Fanci	2.8e-19	149327	MOUSE	Fanconi anemia group I protein homolog	0.344371	0.342433	0.169417		0.422595	0.61495	0.418166		3	0.285407	1.71107		3	0.485237	2.06032
Q6P2B1	Tnpo3	2e-19	104171	MOUSE	Transportin-3	-0.0876012	0.0634356	0.067213		-0.0405247	0.075327	0.0285527		3	0.0143491	0.395327		3	0.0211184	0.526974
O70310	Nmt1	5.4e-20	56888.9	MOUSE	Glycylpeptide N-tetradecanoyltransferase 1	0.0721598	0.181826	0.0124245		0.0413549	0.17025	-0.768383		3	0.0888034	0.967972		3	-0.185593	0.528624
O70311	Nmt2	5.4e-20	60484.8	MOUSE	Glycylpeptide N-tetradecanoyltransferase 2	-0.152071	-0.148914	-0.139356		-0.303552	-0.0266641	0.143828		3	-0.14678	3.47015		3	-0.0621294	0.468113
M0QWZ1	Fam193a	6e-17	166902	MOUSE	Protein FAM193A	-0.0607427	-0.096231	-0.0787216		-0.484297	-0.158537	-0.320399		3	-0.0785651	2.08138		3	-0.321077	1.41954
Q3TA68	Wdr36	3.7e-19	97785.1	MOUSE	Protein Wdr36	-0.188385	-0.345678	-0.160913		-0.37637	-0.453082	-0.387563		3	-0.231659	1.54861		3	-0.405672	2.76195
Q61686	Cbx5	8.6e-22	22186.2	MOUSE	Chromobox protein homolog 5	0.190459	0.714953	0.092494		0.150008	0.00244209	0.00983348		3	0.332636	0.944382		3	0.0540945	0.724892
P83917	Cbx1	3.2e-16	21418	MOUSE	Chromobox protein homolog 1	-0.23947		0.0462674		0.564336	-0.351016	0.321678		2	-0.0966014	0.507587		3	0.178332	0.536359
Q32P00	Cbx3	2.8e-26	20812.5	MOUSE	Chromobox homolog 3 (Drosophila HP1 gamma)	-0.128346	-0.074949	-0.0483268		-0.162113	-0.103494	-0.127522		3	-0.083874	1.45305		3	-0.131043	2.08511
Q8R502	Lrrc8c	2.8e-16	92372.5	MOUSE	Leucine-rich repeat-containing protein 8C	0.020081	-0.00768844	0.062276		0.301186	0.463726	0.373532		3	0.0248895	0.762373		3	0.379482	2.12479
Q4QQR6	Morc3	7.8e-24	106497	MOUSE	Microrchidia 3	-0.166854	-0.125861	-0.116557		-0.096941	-0.134004	-0.135708		3	-0.136424	2.2012		3	-0.122218	2.27817
Q642K0	Myl6	3.6e-27	16961.3	MOUSE	MCG140959, isoform CRA_a	0.111589	0.14202	0.183268		0.0486928	0.139059	0.034326		3	0.145626	2.00563		3	0.0740259	1.11784
Q8CI43	Myl6b	2.2e-11	22749.1	MOUSE	Myosin light chain 6B	0.38127	0.194954	0.197123		0.710078	0.532025	0.672133		3	0.257782	1.57785		3	0.638079	2.4483
P05977	Myl1	6e-15	20594.7	MOUSE	Myosin light chain 1/3, skeletal muscle isoform			0.505589						1	0.505589	#DIV/0!		0	#DIV/0!	#DIV/0!
Q6ZWQ9	Myl12a	2.7e-21	19895.5	MOUSE	MCG5400	0.226446	0.666402	0.313114		0.365109		0.184403		3	0.401987	1.31808		2	0.274756	0.995121
Q3THE2	Myl12b	3.7e-23	19779.3	MOUSE	Myosin regulatory light chain 12B	0.0713662	0.191256	0.123121		0.601412	0.0911395	0.463189		3	0.128581	1.48289		3	0.385247	1.19637
Q9CQ19	Myl9	2e-18	19854.4	MOUSE	Myosin regulatory light polypeptide 9	0.863089	1.32274	1.07498		1.26861	0.339618			3	1.08694	2.13647		2	0.804114	0.777965
E9QNY3	Myl10	5.5e-09	16922.3	MOUSE	Myosin regulatory light chain 10	1.97747	0.0641994				5.88325	-0.400393		2	1.02084	0.620387		2	2.74143	0.566023
D3Z3Q3	Smtn	1.5e-16	103041	MOUSE	Smoothelin	0.0928958	0.335327	0.113407		0.142021	-0.114513	0.422074		3	0.180543	1.13807		3	0.149861	0.662043
Q91WC0	Setd3	2.6e-28	67176.8	MOUSE	Histone-lysine N-methyltransferase setd3	-0.0650098	-0.00858194	-0.0433033		0.178913	0.274264	0.123737		3	-0.038965	1.15133		3	0.192304	1.61529
Q9QZD9	Eif3i	1.3e-17	36461.1	MOUSE	Eukaryotic translation initiation factor 3 subunit I	-0.217042	-0.217432	-0.0226143		-0.0865176	-0.111728	-0.0249817		3	-0.152363	1.14471		3	-0.074409	1.29292
Q3TDD9	Ppp1r21	1.8e-24	88338.3	MOUSE	Protein phosphatase 1 regulatory subunit 21	0.0955205	0.0116365	0.0319382		0.0936714	0.128624	0.130557		3	0.0463651	0.983111		3	0.117617	2.29133
Q8C129	Lnpep	3e-22	117305	MOUSE	Leucyl-cystinyl aminopeptidase	0.030492	0.100937	0.224402		0.349591	0.485539	0.257987		3	0.11861	1.06698		3	0.364372	1.8045
Q80UG5	2025-09-09	1.3e-24	65575.5	MOUSE	Septin-9	0.0768464	0.610218	-0.419012		0.0713617	0.146068	-0.280985		3	0.0893508	0.402279		3	-0.0211852	0.353123
Q3TWJ4	Actr3	1.6e-17	47323.6	MOUSE	Putative uncharacterized protein	0.018315	-0.00930104	0.102311		0.085341	0.137218	0.0505387		3	0.0371085	0.716614		3	0.0910326	1.46386
Q8BVG4	Dpp9	9.7e-20	98002.3	MOUSE	Dipeptidyl peptidase 9	0.00354321	0.0974722	0.161476		0.200219	0.156269	0.119654		3	0.0874973	1.00733		3	0.158714	1.98171
Q80YA7	Dpp8	4.7e-14	102187	MOUSE	Dipeptidyl peptidase 8	-0.254472	-0.443632	0.525399		0.809188	5.26978	0.536399		3	-0.0575685	0.364512		3	2.20512	0.84281
Q9EPK7	Xpo7	1.1e-23	123812	MOUSE	Exportin-7	-0.000433043	-0.10114	0.00177283		0.0260877	0.0156307	0.00162502		3	-0.0332669	0.667167		3	0.0144478	1.04981
Q3UGC8	Pcca	4.3e-16	79922.5	MOUSE	Propionyl-Coenzyme A carboxylase, alpha polypeptide, isoform CRA_b	0.171058	0.0872915	0.267551		0.307972	0.216482	-0.327267		3	0.1753	1.40857		3	0.0657291	0.413544
Q8VDD9	Phip	3.9e-19	206728	MOUSE	PH-interacting protein	-0.0243762	-0.177185	0.223197		-0.066332	-0.193545	-0.152451		3	0.00721188	0.320424		3	-0.137443	1.47505
E9Q2N1	Brwd1	2.2e-16	294684	MOUSE	Bromodomain and WD repeat-containing protein 1 (Fragment)	0.758673	1.02554	-1.63489		-1.69375	-0.425679	-0.38816		3	0.0497737	0.319471		3	-0.835862	1.02054
Q99M31	Hspa14	4.9e-21	54650.7	MOUSE	Heat shock 70 kDa protein 14	-0.133393	-0.0443175	0.0509452		-0.0866504	-0.0766126	-0.0265347		3	-0.0422553	0.593052		3	-0.0632659	1.41692
G5E819	Ppp5c	5.2e-26	56877.2	MOUSE	Serine/threonine-protein phosphatase	-0.0137895	-0.104524	0.153913		0.11978	0.107267	0.0951622		3	0.0118666	0.351723		3	0.107403	2.66256
E9Q912	Rap1gds1	4.2e-20	66077.1	MOUSE	Protein Rap1gds1	-0.0665897	-0.141311	0.0190887		0.00716206	-0.113758	-0.0273294		3	-0.0629375	0.813431		3	-0.0446418	0.769123
E9QKD1	Nol8	1.2e-16	130666	MOUSE	Nucleolar protein 8	-0.102095	-0.29362	-0.206966		-0.410062	-0.676486	-0.601463		3	-0.200893	1.46673		3	-0.56267	2.01551
P46664	Adss	6.5e-20	50021.5	MOUSE	Adenylosuccinate synthetase isozyme 2	-0.300916	-0.107554	-0.207096		-0.290593	-0.134332	-0.181974		3	-0.205189	1.47688		3	-0.2023	1.6155
D3YZP9	Ccdc6	1.4e-20	52939.2	MOUSE	Coiled-coil domain-containing protein 6	0.0475638	0.0566737	0.0828481		0.197689	0.0537346	-0.154277		3	0.0623619	1.86054		3	0.0323822	0.408213
Q9CQS5	Riok2	1.9e-26	62491	MOUSE	Serine/threonine-protein kinase RIO2	-0.527899	-0.371092	-0.151027		-0.861087	-1.90002	-0.882634		3	-0.350006	1.37038		3	-1.21458	1.4483
D3Z7P3	Gls	1.5e-20	73964.4	MOUSE	Glutaminase kidney isoform, mitochondrial	-0.101897	-0.106111	-0.0217259		0.400915	0.137118	0.469487		3	-0.0765781	1.26728		3	0.33584	1.3968
P08249	Mdh2	1.9e-19	35611.8	MOUSE	Malate dehydrogenase, mitochondrial	-0.0266448	-0.169894	-0.0287032		0.189174	0.244776	0.210636		3	-0.0750807	0.895987		3	0.214862	2.55056
P25799	Nfkb1	1.3e-21	105616	MOUSE	Nuclear factor NF-kappa-B p105 subunit	0.0508791	0.176532	0.14815		0.147854	-0.0937226	0.0158956		3	0.125187	1.39112		3	0.0233424	0.414544
E9Q3G8	Nup153	9.4e-23	152009	MOUSE	Protein Nup153	-0.0308691	0.397657	-0.165939		-0.360573	-0.396155	-0.0897916		3	0.0669499	0.436774		3	-0.282173	1.30024
Q9Z0H1	Wdr46	1.3e-20	69048.8	MOUSE	WD repeat-containing protein 46	-0.530087	-0.506941	-0.330406		-0.802751	-0.815693	-0.689986		3	-0.455811	2.03138		3	-0.769477	2.87278
Q8K268	Abcf3	6.6e-21	79865.5	MOUSE	ATP-binding cassette sub-family F member 3	-0.0464344	-0.0484193	0.122928		-0.262019	0.0664155	0.0787855		3	0.00935813	0.354451		3	-0.0389395	0.419957
Q99K01	Pdxdc1	7.5e-20	87336.2	MOUSE	Pyridoxal-dependent decarboxylase domain-containing protein 1	0.103591	0.0860222	0.119194		-0.00316858	0.228455	-0.0148342		3	0.102936	2.36889		3	0.0701507	0.629566
P62137	Ppp1ca	7e-25	37540.4	MOUSE	Serine/threonine-protein phosphatase PP1-alpha catalytic subunit	0.195782	-0.033165	0.0755801		0.141727	0.0554006	-0.560896		3	0.0793991	0.75358		3	-0.121256	0.495786
P63087	Ppp1cc	7e-25	36984.1	MOUSE	Serine/threonine-protein phosphatase PP1-gamma catalytic subunit	-0.136349	-0.217765	-0.00714234		0.0215661	-4.09034			3	-0.120419	1.02565		2	-2.03439	0.599154
P62141	Ppp1cb	7e-25	37187.2	MOUSE	Serine/threonine-protein phosphatase PP1-beta catalytic subunit	-0.176413	-0.108562	-0.116393		0.159868	0.0968091	0.0532262		3	-0.133789	1.90811		3	0.103301	1.40194
Q91ZJ5	Ugp2	1.1e-21	56979.8	MOUSE	UTP--glucose-1-phosphate uridylyltransferase	0.29567	0.248317	0.175256		0.412657	0.108305	0.332019		3	0.239747	1.98545		3	0.284327	1.35145
Q9CWS0	Ddah1	3.4e-19	31381.3	MOUSE	N(G),N(G)-dimethylarginine dimethylaminohydrolase 1	-0.089432	-0.0874965	0.0164558		0.0462959	-0.010531	0.183709		3	-0.0534909	0.876456		3	0.0731581	0.779641
Q99LD8	Ddah2	4.1e-21	29646.1	MOUSE	N(G),N(G)-dimethylarginine dimethylaminohydrolase 2	0.687274	0.358676	0.286345		0.445391	0.165597	0.361268		3	0.444098	1.46061		3	0.324086	1.52568
Q99K28	Arfgap2	8.4e-20	56598.8	MOUSE	ADP-ribosylation factor GTPase-activating protein 2	-0.0131523	0.257121	0.0390513		-0.225689	0.071289	0.330847		3	0.09434	0.729901		3	0.0588157	0.426217
Q505F5	Lrrc47	1.8e-21	63590.8	MOUSE	Leucine-rich repeat-containing protein 47	-0.0712951	-0.1038	-0.0466591		0.02053	-0.130303	-0.162347		3	-0.073918	1.63232		3	-0.0907065	0.904941
P29758	Oat	1.1e-17	48355	MOUSE	Ornithine aminotransferase, mitochondrial	0.314811	0.125233	0.320661		0.656572	0.534729	0.604199		3	0.253568	1.53377		3	0.5985	2.76216
Q059T9	Prpf4	-1	58370.6	MOUSE	PRP4 pre-mRNA processing factor 4 homolog (Yeast)	-0.0433661	0.0164795	0.0885794		0.209297	0.217747	0.159202		3	0.0205643	0.492286		3	0.195415	2.36511
Q7TNV0	Dek	6.6e-22	43158.9	MOUSE	Protein DEK	-0.107517	-0.0419111	-0.0076165		0.0529574	0.207799	-0.0476993		3	-0.0523484	0.966605		3	0.071019	0.657517
Q9WVA4	Tagln2	5.2e-17	22395.6	MOUSE	Transgelin-2	0.0156171	0.261224	0.102196		0.130163	-0.107139	-0.127244		3	0.126345	0.956545		3	-0.0347397	0.44665
Q9R1Q8	Tagln3	2.1e-13	22470.9	MOUSE	Transgelin-3					-0.965367				0	#DIV/0!	#DIV/0!		1	-0.965367	#DIV/0!
B9EKS2	Kdm3b	5e-21	191461	MOUSE	Jumonji domain containing 1B	-0.0347645	0.163055	0.0438187		-0.0816367	-0.13682	0.172434		3	0.0573696	0.674111		3	-0.0153411	0.353195
Q6PCM1	Kdm3a	1.9e-14	147849	MOUSE	Lysine-specific demethylase 3A	0.513328	0.0612062	0.102313		-0.394228	0.309896	0.206312		3	0.225615	0.888614		3	0.04066	0.361451
Q9D0I8	Mrto4	3.8e-28	27545.9	MOUSE	mRNA turnover protein 4 homolog	-0.181185	-0.375556	-0.179975		-0.503297	-0.474936	-0.228889		3	-0.245572	1.49859		3	-0.402374	1.65928
P59325	Eif5	2.8e-21	48968.8	MOUSE	Eukaryotic translation initiation factor 5	-0.240184	-0.115486	-0.252812		-0.171034	-0.165058	-0.209205		3	-0.202827	1.66107		3	-0.181766	2.54229
P61164	Actr1a	1e-18	42614.1	MOUSE	Alpha-centractin	0.0687325	0.163726	0.113088		-0.0399561	0.358935	0.144046		3	0.115182	1.58215		3	0.154341	0.806232
Q8R5C5	Actr1b	3.9e-17	42281.7	MOUSE	Beta-centractin	0.27281	-0.0300002	-0.00912912		-0.241027	0.681875	0.186611		3	0.0778935	0.594573		3	0.209153	0.589238
Q99K43	Prc1	9.7e-18	70290.8	MOUSE	Protein regulator of cytokinesis 1	0.250831	0.201569	0.258598		0.39355	0.322688	0.608899		3	0.236999	2.55062		3	0.441712	1.74561
O35594	Ift81	8.7e-14	79285.9	MOUSE	Intraflagellar transport protein 81 homolog	0.585268	0.134067	0.18985		0.0140267	0.0331555	0.0422111		3	0.303061	1.07979		3	0.0297977	1.4578
P70441	Slc9a3r1	9.6e-18	38600.4	MOUSE	Na(+)/H(+) exchange regulatory cofactor NHE-RF1	0.100316	0.088527	0.0853758		0.292142	0.282337	0.206028		3	0.0914061	2.9092		3	0.260169	2.26889
Q6DFV1	Ncapg2	6.8e-23	130895	MOUSE	Condensin-2 complex subunit G2	0.243651	0.30789	0.256208		0.259361	0.494395	0.364384		3	0.26925	2.57775		3	0.372713	1.8001
P42227	Stat3	3.1e-18	88054.6	MOUSE	Signal transducer and activator of transcription 3	0.067147	0.140323	0.113129		0.139036	0.0757253	0.156391		3	0.106866	1.72482		3	0.123717	1.73178
P27046	Man2a1	7.3e-15	131633	MOUSE	Alpha-mannosidase 2	-0.0149022	-0.298508	-0.159375		0.227046	0.228799	-0.407054		3	-0.157595	1.01294		3	0.0162637	0.325255
Q197W7	Man2a2	4.4e-06	130650	MOUSE	Mannosidase 2, alpha 2, isoform CRA_c	6.50999	6.5038				5.90506			2	6.5069	3.81977		1	5.90506	#DIV/0!
P28658	Atxn10	1.9e-17	53707.4	MOUSE	Ataxin-10	-0.13369	-0.0359716	-0.104137		-0.458838	-0.503703	-0.466866		3	-0.0912663	1.35896		3	-0.476469	3.37707
Q3UDQ7	Afg3l2	2.1e-15	88749.6	MOUSE	Putative uncharacterized protein	-0.0101566	-0.31331	-0.0622806		0.345234	0.300587	0.396519		3	-0.128582	0.819358		3	0.347446	2.50149
Q920A7	Afg3l1	4.4e-17	87047.4	MOUSE	AFG3-like protein 1	0.273544	-0.0611636	0.0266722		-0.258813	-0.104101	-0.175181		3	0.0796841	0.593612		3	-0.179365	1.54603
P54822	Adsl	3e-17	54866.7	MOUSE	Adenylosuccinate lyase	-0.0913476	-0.0211537	0.145264		0.278044	0.113293	0.19638		3	0.0109208	0.351349		3	0.195906	1.5671
Q62036	Azi1	3.9e-21	120314	MOUSE	5-azacytidine-induced protein 1	0.546622	0.466998	0.232922		1.04215	0.537719	0.0105615		3	0.415514	1.62257		3	0.530143	0.964531
Q3TM09	Nup88	1.3e-18	84212.6	MOUSE	Putative uncharacterized protein	0.00248004	0.0395328	-0.005033		-0.0618632	-0.188801	-0.0068648		3	0.0123266	0.633304		3	-0.085843	0.899497
F8VQ54	Dicer1	7.9e-20	215771	MOUSE	Endoribonuclease Dicer	-0.12393	-0.074443	-0.0872899		0.0611501	0.0792865	-0.16838		3	-0.0952209	1.93191		3	-0.00931449	0.338354
B9EKI3	Tmf1	3e-20	121804	MOUSE	TATA element modulatory factor	0.165169	0.169119	0.116904		0.217714	0.181902	0.335214		3	0.150397	2.21368		3	0.244943	1.77047
A2AGH6	Med12	4.2e-20	244563	MOUSE	Mediator of RNA polymerase II transcription subunit 12	-0.00894475	-0.129899	0.0110727		-0.0635234	-0.273445	0.0380294		3	-0.0425905	0.662055		3	-0.0996462	0.709122
Q3UG15	Adam9	2.2e-25	92050.3	MOUSE	A disintegrin and metallopeptidase domain 9 (Meltrin gamma), isoform CRA_a	0.233679	-0.0669777	0.203892		0.477267	0.505471	-1.45751		3	0.123531	0.788309		3	-0.158256	0.381819
P20664	Prim1	5.7e-18	49295.9	MOUSE	DNA primase small subunit	-0.0939391	-0.152526	0.00781565		-0.0983664	-0.0548375	-0.11535		3	-0.0795497	0.936369		3	-0.089518	1.7188
P14869	Rplp0	6.9e-29	34216.7	MOUSE	60S acidic ribosomal protein P0	-0.247173	-0.251186	-0.0254476		-0.389468	-0.236952	-0.245805		3	-0.174602	1.14246		3	-0.290742	1.85842
P13595	Ncam1	2.2e-22	119428	MOUSE	Neural cell adhesion molecule 1	-0.0753022	-0.116241	0.133895		0.0159229	-0.120903	0.140187		3	-0.019216	0.383405		3	0.0117356	0.351346
O08582	Gtpbp1	4.2e-20	72301.3	MOUSE	GTP-binding protein 1	0.0180788	0.187274	0.190214		0.134781	0.230108	0.0886517		3	0.131856	1.13555		3	0.15118	1.46709
Q3TG12	Farsb	1.1e-16	65566.6	MOUSE	Putative uncharacterized protein (Fragment)	-0.0439334	-0.0187446	-0.127235		0.0970565	0.0709601	-0.313963		3	-0.0633043	1.01499		3	-0.0486489	0.426336
Q9WUN2	Tbk1	5.5e-22	83425.4	MOUSE	Serine/threonine-protein kinase TBK1	0.0717749	0.203953	0.00827275		0.130233	0.217304	0.247002		3	0.0946668	0.916865		3	0.19818	1.82586
Q3U6P9	Ikbke	4.6e-07	80855	MOUSE	Putative uncharacterized protein							-0.214969		0	#DIV/0!	#DIV/0!		1	-0.214969	#DIV/0!
P14148	Rpl7	3.3e-17	31419.9	MOUSE	60S ribosomal protein L7	-0.299355	-0.252904	-0.0754837		-0.346083	-0.210181	-0.300202		3	-0.209248	1.33789		3	-0.285488	2.02244
Q6A009	Ltn1	2.3e-16	198923	MOUSE	E3 ubiquitin-protein ligase listerin	0.074861	0.000807907	-0.029954		-0.185699	-0.155616	0.0232003		3	0.0152383	0.473221		3	-0.106038	0.911166
P62814	Atp6v1b2	9.8e-16	56551.3	MOUSE	V-type proton ATPase subunit B, brain isoform	-0.0537158	0.09316	0.1119		0.227651	0.188109	0.207235		3	0.0504482	0.66057		3	0.207665	2.82262
Q9D1M0	Sec13	1.4e-31	35566	MOUSE	Protein SEC13 homolog	0.140836	0.209487	0.156909		0.184109	0.211733	0.123077		3	0.169077	2.13363		3	0.172973	1.9553
Q6PF93	Pik3c3	1.1e-20	101488	MOUSE	Phosphatidylinositol 3-kinase catalytic subunit type 3	0.244097	0.269522	0.334255		0.304293	0.0657314	0.147283		3	0.282625	2.35177		3	0.172436	1.17792
Q3TGM7	Hbs1l	1.8e-15	74828.8	MOUSE	Putative uncharacterized protein	-0.115355	0.158966	-0.359076		-0.0737097	0.0309157	0.0248684		3	-0.105155	0.556743		3	-0.00597519	0.358344
Q80WJ7	Mtdh	1.7e-19	63846.5	MOUSE	Protein LYRIC	-0.173086	0.102145	-0.377325		-0.751392	-0.408127	-0.394383		3	-0.149422	0.70485		3	-0.517968	1.62656
P61202	Cops2	3e-17	51597.1	MOUSE	COP9 signalosome complex subunit 2	-0.0844352	-0.114384	0.0415632		0.185665	0.0707244	0.206792		3	-0.0524186	0.71326		3	0.154394	1.47186
Q8BRH0	Tmtc3	8.6e-17	104199	MOUSE	Transmembrane and TPR repeat-containing protein 3	-0.029646	-0.253177	-0.102042		0.133389	0.146452	-0.16156		3	-0.128289	1.0206		3	0.0394269	0.436015
Q9DCV4	Rmdn1	1.2e-09	35000.5	MOUSE	Regulator of microtubule dynamics protein 1	0.100087	0.853953	-0.30605		0.336347	0.163425	-0.209182		3	0.215996	0.530124		3	0.0968632	0.516807
Q5SWD9	Tsr1	3.1e-17	92105.9	MOUSE	Pre-rRNA-processing protein TSR1 homolog	-0.439917	-0.569657	-0.217296		-0.556932	-0.746411	-0.704419		3	-0.408957	1.53866		3	-0.669254	2.43833
Q9CYG7	Tomm34	1.1e-18	34278.3	MOUSE	Mitochondrial import receptor subunit TOM34	-0.00476464	0.163864	-0.083587		0.36653	0.109688	0.086714		3	0.0251708	0.418462		3	0.187644	1.06672
Q3UEG9	Flot2	7.7e-16	50256.3	MOUSE	Putative uncharacterized protein	0.203004	0.115211	0.163712		0.262035	0.368317	0.354453		3	0.160643	1.91934		3	0.328268	2.29376
Q62376	Snrnp70	2.2e-20	51992.5	MOUSE	U1 small nuclear ribonucleoprotein 70 kDa	-0.11597	-0.0962055	-0.0185486		-0.0829976	-0.115744	-0.0130376		3	-0.0769079	1.21263		3	-0.0705931	1.13939
Q3UI45	Sf1	3.7e-15	68347.6	MOUSE	Putative uncharacterized protein	-0.0537731	-0.0284914	-0.157285		-0.337126	-0.23434	-0.569948		3	-0.0798498	1.04595		3	-0.380471	1.50979
Q4VA93	Prkca	9.7e-23	76824.7	MOUSE	Protein kinase C	0.108727	-0.0235405	-0.013333		-0.0129088	-0.0959336	-0.205504		3	0.0239511	0.501868		3	-0.104782	0.99771
P28867	Prkcd	1.8e-19	77548	MOUSE	Protein kinase C delta type	-0.405516	0.330406	0.0239279		0.160965	0.388872	0.280808		3	-0.017061	0.326258		3	0.276882	1.58393
P16054	Prkce	8.2e-25	83561.4	MOUSE	Protein kinase C epsilon type	-0.403462		-0.450734				0.0707151		2	-0.427098	1.75455		1	0.0707151	#DIV/0!
Q8VI75	Ipo4	1.3e-18	119276	MOUSE	Importin-4	-0.0496952	-0.138619	-0.136865		-0.0132488	-0.0279373	-0.0359348		3	-0.108393	1.48055		3	-0.0257069	1.51743
Q91YP2	Nln	4.6e-16	80429.8	MOUSE	Neurolysin, mitochondrial	0.0608256	-0.0291044	0.0916428		0.105999	0.0907411	0.200971		3	0.0411213	0.728156		3	0.13257	1.51227
Q9CQ65	Mtap	8.8e-24	31062.2	MOUSE	S-methyl-5'-thioadenosine phosphorylase	-0.245363	-0.251406	-0.130483		-0.0839276	-0.139221	-0.119076		3	-0.209084	1.77436		3	-0.114075	2.01155
Q8BVE8	Whsc1	4.7e-20	152254	MOUSE	Histone-lysine N-methyltransferase NSD2	0.257978	0.543785	-0.0709602		-0.465536	-0.559794	-0.490704		3	0.243601	0.818444		3	-0.505345	2.81042
Q0VBL3	Rbm15	2.4e-17	105722	MOUSE	Protein Rbm15	0.0668568	-0.0139247	-0.168327		-0.230305	0.0180733	-1.16009		3	-0.0384649	0.499463		3	-0.45744	0.782281
Q9Z0X1	Aifm1	3.7e-16	66766.1	MOUSE	Apoptosis-inducing factor 1, mitochondrial	-0.0566573	-0.20512	-0.0292522		0.153375	0.106718	0.173758		3	-0.0970099	0.963043		3	0.144617	2.03836
Q9JLQ0	Cd2ap	2.7e-17	70450.5	MOUSE	CD2-associated protein	-0.052991	0.127219	-0.00829023		-0.0401559	-0.093552	-0.192371		3	0.0219792	0.441134		3	-0.108693	1.17063
A2AIV2	Kiaa1429	6.8e-19	201441	MOUSE	Protein virilizer homolog	-0.0292532	-0.0295697	-0.115764		-0.24859	-0.383751	-0.0524878		3	-0.0581957	1.04438		3	-0.228276	1.1521
Q3TI84	Cdc16	2.4e-21	71460.9	MOUSE	CDC16 cell division cycle 16 homolog (S. cerevisiae), isoform CRA_e	0.0436794	0.033994	0.0243453		0.140909	0.167601	0.0158704		3	0.0340062	1.88781		3	0.108127	1.13391
Q6ZWV3	Rpl10	2e-22	24604.1	MOUSE	60S ribosomal protein L10	-0.147138	-0.129234	-0.0838823		-0.393733	-0.23327	-0.244699		3	-0.120085	1.92622		3	-0.290568	1.82078
P83093	Stim2	5.2e-20	83925.6	MOUSE	Stromal interaction molecule 2	-0.0945444	-0.349856	0.146822		-0.331879	-0.0589357	-0.676687		3	-0.0991925	0.552364		3	-0.355834	1.03445
P23249	Mov10	1.7e-12	113584	MOUSE	Putative helicase MOV-10	0.25517	0.250131	0.271609		0.313854	0.33246	0.282694		3	0.25897	3.50415		3	0.309669	2.96047
P08752	Gnai2	8.3e-25	40489.3	MOUSE	Guanine nucleotide-binding protein G(i) subunit alpha-2	0.114013	-0.0825714	0.0937174		-0.0140386	0.0276275	0.0277717		3	0.0417197	0.543093		3	0.0137869	0.671468
Q3TJH1	Gnai3	6.9e-20	40539.5	MOUSE	Putative uncharacterized protein	-0.223238	-0.335208	-0.0133649		-0.127329	0.28476	-0.108369		3	-0.190604	1.044		3	0.0163541	0.339979
P18872	Gnao1	2.8e-16	40084.9	MOUSE	Guanine nucleotide-binding protein G(o) subunit alpha	-0.0796264	0.0299341	-0.0433192		0.443631	0.103183	1.31958		3	-0.0310038	0.660082		3	0.622133	0.942917
P15116	Cdh2	2.2e-41	99797.2	MOUSE	Cadherin-2	0.18997	0.0322129	0.0852789		0.00996319	0.173624	0.285555		3	0.102487	1.10362		3	0.156381	1.02255
P06801	Me1	1.6e-20	63954.3	MOUSE	NADP-dependent malic enzyme	0.213013	0.136988	0.129086		0.411339	0.434035	0.36534		3	0.159696	1.87061		3	0.403571	2.90349
Q5DW34	Ehmt1	2.7e-19	142000	MOUSE	Histone-lysine N-methyltransferase EHMT1	0.0197254	0.0271871	-0.0161152		-0.192821	-0.4353	-0.00796579		3	0.0102658	0.582756		3	-0.212029	0.941691
Q3U4G9	Ehmt2	2.5e-18	134719	MOUSE	Putative uncharacterized protein	-0.0102549	-0.182583	-0.203884		-0.126797	-0.0487214	-0.182638		3	-0.13224	1.087		3	-0.119385	1.3395
Q8BKE6	Cyp20a1	5.7e-19	52149.7	MOUSE	Cytochrome P450 20A1	-0.133773	-0.169106	0.000436817		0.219052	0.235938	-0.0253985		3	-0.100814	1.02188		3	0.143197	0.935545
P45376	Akr1b1	4.8e-21	35732.6	MOUSE	Aldose reductase	-0.308862	-0.0819618	-0.0278319		-0.349654	-0.0772785	-0.0267525		3	-0.139552	0.909306		3	-0.151228	0.868769
Q9QWT9	Kifc1	1.7e-18	74153.6	MOUSE	Kinesin-like protein KIFC1	0.0897984	-0.494683	0.390539		0.629457	0.709003	0.600956		3	-0.00478196	0.306717		3	0.646472	2.90455
E9PUA5	Kifc5b	1.7e-18	73683	MOUSE	Protein Kifc5b	8.42788	-0.111113	-2.34945						3	1.98911	0.518374		0	#DIV/0!	#DIV/0!
Q69Z38	Peak1	2e-17	191098	MOUSE	Pseudopodium-enriched atypical kinase 1	-0.0378718	0.139082	0.102937		-0.0394814	-0.158125	0.0169343		3	0.0680491	0.776532		3	-0.0602241	0.740643
Q8CHY6	Gatad2a	2.2e-21	67334.6	MOUSE	Transcriptional repressor p66 alpha	0.0734298	0.101895	-0.127026		-0.0872249	-0.0444795	-0.23632		3	0.0160997	0.374741		3	-0.122675	1.07223
Q5F2E7	Nufip2	6.1e-26	75657.4	MOUSE	Nuclear fragile X mental retardation-interacting protein 2	-0.162913	0.564279	-0.219862		-0.315047	-0.680834	-0.216009		3	0.0605015	0.380436		3	-0.403964	1.28508
Q80TJ7	Phf8	1.1e-17	113554	MOUSE	Histone lysine demethylase PHF8		0.0540372	-0.164612		-1.49957		-0.0989666		2	-0.0552874	0.454738		2	-0.799268	0.640121
Q80YV2	Zc3hc1	5.3e-20	55196.7	MOUSE	Nuclear-interacting partner of ALK	0.0195059	0.128668	-0.0455039		-0.060224	-0.297611	0.116294		3	0.0342234	0.545127		3	-0.0805135	0.544309
P21956	Mfge8	4.3e-20	51241.4	MOUSE	Lactadherin	-0.225206	-0.607409	-0.411764		0.0253478	-0.215563	-0.315159		3	-0.414793	1.49456		3	-0.168458	0.925334
Q9JL26	Fmnl1	6.3e-17	122061	MOUSE	Formin-like protein 1	0.0531892	-0.148202	-0.464442		-0.257267	-0.31974	-0.277898		3	-0.186485	0.767816		3	-0.284969	2.68474
A2APV2	Fmnl2	6.8e-15	123102	MOUSE	Formin-like protein 2	-0.338122	-0.506667	-1.41891		-0.581114	-1.57499	-1.11776		3	-0.754566	1.11463		3	-1.09129	1.50299
Q6ZPE2	Sbf1	1.3e-21	208694	MOUSE	Myotubularin-related protein 5	0.149802	0.112173	0.130009		0.135458	0.1625	0.187735		3	0.130661	2.46554		3	0.161898	2.36752
E9PXF8	Sbf2	4.3e-09	210460	MOUSE	Protein Sbf2		0.231006	-1.44919				-1.19017		2	-0.609093	0.522421		1	-1.19017	#DIV/0!
Q3UVN5	Nsfl1c	4e-17	40953.6	MOUSE	Putative uncharacterized protein	0.0597333	-0.0834025	-0.170159		0.106526	-0.0205586	0.0127305		3	-0.0646092	0.660767		3	0.0328993	0.621287
Q3TX72	Fkbp5	7.2e-17	51014.5	MOUSE	Putative uncharacterized protein	0.470905	0.274503	0.0113493		0.312222	0.266547	0.247854		3	0.252252	1.00305		3	0.275541	2.62164
Q9JKB1	Uchl3	8e-18	26151.9	MOUSE	Ubiquitin carboxyl-terminal hydrolase isozyme L3	-0.172993	0.0496037	-0.12254		-0.107245	-0.133409	-0.174304		3	-0.0819765	0.759636		3	-0.138319	2.01487
Q8BWZ3	Naa25	4.7e-14	111709	MOUSE	N-alpha-acetyltransferase 25, NatB auxiliary subunit	-0.161389	-0.280248	-0.100347		-0.139059	-0.0231339	-0.887915		3	-0.180661	1.42092		3	-0.350036	0.788302
Q61136	Prpf4b	3.2e-18	116977	MOUSE	Serine/threonine-protein kinase PRP4 homolog	-0.157494	0.251202	-0.0387155		-0.215203	-0.158513	-0.0734615		3	0.0183308	0.349782		3	-0.149059	1.46474
Q6R891	Ppp1r9b	2.2e-16	89521	MOUSE	Neurabin-2	-0.229624	0.0182281	-0.074734		-0.0782822	-0.226003	-0.634106		3	-0.0953766	0.798826		3	-0.312797	0.99875
Q8CGB3	Uaca	3.7e-17	160814	MOUSE	Uveal autoantigen with coiled-coil domains and ankyrin repeats	-0.374091	-0.0711884	-0.233688		0.0206203	0.147887	-0.119491		3	-0.226323	1.21244		3	0.0163386	0.370578
Q99KV1	Dnajb11	5.6e-22	40555.4	MOUSE	DnaJ homolog subfamily B member 11	0.176566	0.119971	0.225526		0.364955	0.376683	0.157184		3	0.174021	1.83316		3	0.299608	1.58315
Q00993	Axl	1.1e-18	98191.8	MOUSE	Tyrosine-protein kinase receptor UFO	-0.0841167	-0.174412	0.0410873		-0.36926	-0.093672	0.280451		3	-0.0724805	0.737794		3	-0.0608268	0.410448
P60335	Pcbp1	7.9e-23	37498.2	MOUSE	Poly(rC)-binding protein 1	-0.0879738	0.215826	-0.120775		-0.529923	-0.216881	-0.612441		3	0.0023593	0.307844		3	-0.453082	1.49488
Q61990	Pcbp2	2.5e-17	38222	MOUSE	Poly(rC)-binding protein 2	-0.0343793	-1.02627	-0.379296		-0.323417	-0.157784	-0.76926		3	-0.479982	0.919848		3	-0.41682	1.1252
P57724	Pcbp4	1.5e-13	41399	MOUSE	Poly(rC)-binding protein 4	0.317255	0.58859	-0.209287		-0.441319	-0.998878	-0.884321		3	0.232186	0.671611		3	-0.774839	1.64857
Q8R480	Nup85	1.5e-18	74777	MOUSE	Nuclear pore complex protein Nup85	-0.00165804	-0.158592	0.0317079		0.0154903	-0.0465386	0.0936113		3	-0.0428474	0.567711		3	0.0208543	0.482662
Q99PT1	Arhgdia	6.4e-20	23407.6	MOUSE	Rho GDP-dissociation inhibitor 1	0.120353	0.0338869	0.0280381		0.075372	0.034822	0.262288		3	0.0607593	1.04888		3	0.124161	0.961939
Q8BT60	Cpne3	8.1e-22	59585.5	MOUSE	Copine-3	0.0801258	0.0997481	0.242083		0.361257	0.383766	0.383602		3	0.140652	1.25852		3	0.376208	3.70481
Q3U893	Cpne1	4.5e-11	58929.1	MOUSE	Putative uncharacterized protein	0.0652493	0.0732085	0.0637904		0.370897	1.44327	0.279993		3	0.0674161	3.02703		3	0.698054	0.994408
Q91YJ2	Snx4	4.1e-17	51778	MOUSE	Sorting nexin-4	0.0617326	0.329053	0.0331266		0.227773	0.068577	0.0399716		3	0.141304	0.865635		3	0.112107	1.01103
Q9WU40	Lemd3	6.6e-26	100308	MOUSE	Inner nuclear membrane protein Man1	0.302388	-0.0611649	0.0260008		0.0284693	-0.159448	0.00643056		3	0.0890747	0.600601		3	-0.041516	0.55565
Q3TT85	Pus1	3.6e-20	44070.5	MOUSE	tRNA pseudouridine synthase	-0.304874	-0.398533	-0.222186		-0.108036	-0.19171	0.0883333		3	-0.308531	1.88284		3	-0.070471	0.615066
Q3ULZ3	Psat1	1.1e-16	40445.9	MOUSE	Putative uncharacterized protein	-0.214799	-0.161913	-0.397007		-0.362617	-0.298809	-0.304549		3	-0.257906	1.46541		3	-0.321991	2.7009
Q8K1X1	Wdr11	4.2e-20	135938	MOUSE	WD repeat-containing protein 11	0.174719	0.259364	0.227279		0.430369	0.430278	0.057826		3	0.220454	2.21133		3	0.306158	1.17865
Q3TDI5	Pex19	1.2e-21	32723.7	MOUSE	Peroxisome biogenesis factor 19, isoform CRA_e	0.0501518	0.361293	0.158484		-0.0168661	0.0909603	0.0625923		3	0.189976	1.06394		3	0.0455621	0.833457
Q9JK81	Myg1	1.6e-19	42722.9	MOUSE	UPF0160 protein MYG1, mitochondrial	-0.0132413	-0.0874925	-0.00831649		0.129215	0.0463779	0.129559		3	-0.0363501	0.836217		3	0.101717	1.47702
Q5ND51	Crk	2.5e-18	33815	MOUSE	V-crk sarcoma virus CT10 oncogene homolog (Avian), isoform CRA_a	0.223096	0.0209413	0.0321577		0.137834	0.235784	0.465255		3	0.0920649	0.830355		3	0.279624	1.29131
Q9D666	Sun1	5.4e-23	101977	MOUSE	SUN domain-containing protein 1	0.474241	0.602774	0.289262		0.373299	0.429124	0.229687		3	0.455426	1.72497		3	0.344037	1.84554
Q6NXX6	Atp6v0a1	9.4e-15	95641.9	MOUSE	Atp6v0a1 protein	0.154071	-0.0176625	0.0730354		0.301583	0.366017	0.170122		3	0.0698148	0.831835		3	0.279241	1.69823
Q3TL79	Ahsa1	5.4e-18	38145.5	MOUSE	Putative uncharacterized protein	-0.125724	-0.193433	-0.0994394		-0.203661	-0.386374	-0.0888857		3	-0.139532	1.72142		3	-0.226307	1.21978
O54825	Bysl	4.1e-25	49784	MOUSE	Bystin	-0.36941	-0.299259	-0.334273		-0.596532	-0.6203	-0.537018		3	-0.334314	2.73884		3	-0.584617	3.04814
Q8R422	Cd109	4.6e-20	161660	MOUSE	CD109 antigen	-0.0187936	0.196818	0.354575		0.623679	-0.0191626	0.475736		3	0.177533	0.916194		3	0.360084	0.988983
Q9Z0P4	Palm	5.4e-18	41614.7	MOUSE	Paralemmin-1	0.482124	0.653579	0.101774		0.474894	0.387733	0.45864		3	0.412492	1.19678		3	0.440422	2.73622
Q8BR92	Palm2	4.2e-17	42095.5	MOUSE	Paralemmin-2	0.0174156	-0.0186561	0.160051		0.267839	-0.537431	-1.05098		3	0.0529369	0.663268		3	-0.440189	0.732697
Q8CIM8	Ints4	6.2e-22	108194	MOUSE	Integrator complex subunit 4	0.154662	0.0542833	0.0633156		-0.0618636	0.0705988	-0.049558		3	0.0907535	1.27807		3	-0.0136076	0.410073
Q9Z1T1	Ap3b1	8.6e-14	122741	MOUSE	AP-3 complex subunit beta-1	-0.438341	0.128085	0.101832		0.122231	0.122908	0.22518		3	-0.0694748	0.43015		3	0.156773	1.65315
Q6PNC0	Dmxl1	1.1e-18	336012	MOUSE	DmX-like protein 1	0.201705	0.248251	-0.00444577		0.271643	0.446064	-0.15716		3	0.148503	1.00891		3	0.186849	0.691845
Q8BPN8	Dmxl2	1.8e-10	338212	MOUSE	DmX-like protein 2			0.27612				-0.471006		1	0.27612	#DIV/0!		1	-0.471006	#DIV/0!
Q9CQU1	Mfap1	2.6e-26	51954.9	MOUSE	Microfibrillar-associated protein 1	-0.301643	0.152719	0.0522998		0.026785	-0.407617	-0.307177		3	-0.0322083	0.378336		3	-0.229336	0.953087
Q60737	Csnk2a1	5.6e-20	45133.9	MOUSE	Casein kinase II subunit alpha	-0.0949986	-0.0241366	-0.0594924		0.0705894	-0.240375	-0.125978		3	-0.0595425	1.29868		3	-0.0985878	0.708796
P51881	Slc25a5	5.5e-17	32931.6	MOUSE	ADP/ATP translocase 2	-0.0894312	-0.399261	-0.0511744		-0.00974427	0.107729	-0.283494		3	-0.179956	0.913474		3	-0.0618364	0.490111
P48962	Slc25a4	3.1e-15	32904.6	MOUSE	ADP/ATP translocase 1	-0.0719704	-0.370882	-0.0895126		0.358605	0.196735	0.0435408		3	-0.177455	0.98221		3	0.199627	1.0985
Q3V132	Slc25a31	6.6e-10	35258.2	MOUSE	ADP/ATP translocase 4			-0.18436						1	-0.18436	#DIV/0!		0	#DIV/0!	#DIV/0!
P63005	Pafah1b1	2.6e-19	46670.5	MOUSE	Platelet-activating factor acetylhydrolase IB subunit alpha	-0.0453061	-0.150568	0.0185843		-0.00172211	0.0144612	0.183255		3	-0.0590965	0.75262		3	0.0653313	0.716184
O89001	Cpd	2.1e-20	152407	MOUSE	Carboxypeptidase D	0.0275188	0.410138	-0.078451		0.0475649	0.159037	-0.172113		3	0.119735	0.598233		3	0.0114961	0.338789
Q3UJA5	Asap1	7.5e-19	121246	MOUSE	Putative uncharacterized protein	-0.12606	-0.0317131	0.0264857		0.0231109	-0.0159663	-0.0279727		3	-0.0437626	0.66896		3	-0.00694268	0.458009
Q8BXZ1	Tmx3	5.2e-23	51848.5	MOUSE	Protein disulfide-isomerase TMX3	-0.00974231	-0.150933	0.0491289		0.228628	0.26739	0.259529		3	-0.0371822	0.526494		3	0.251849	2.95876
Q3U944	Lman1	5.5e-17	61274.7	MOUSE	Putative uncharacterized protein	0.160588	0.12875	0.183143		0.464198	0.542257	0.13416		3	0.157494	2.30594		3	0.380205	1.3311
Q9CU65	Zmym2	2.8e-19	154643	MOUSE	Zinc finger MYM-type protein 2	-0.00758091	0.030236	0.0520376		-0.200235	-0.348446	-0.175733		3	0.0248975	0.840003		3	-0.241472	1.63386
P35761	Ttk	9.3e-20	96211.7	MOUSE	Dual specificity protein kinase TTK	-0.0828483	0.0920042	0.0323593		-0.00688368	0.0396344	0.00649103		3	0.0138384	0.391102		3	0.0130806	0.653655
Q99LN9	Dohh	1.2e-18	32905.7	MOUSE	Deoxyhypusine hydroxylase	-0.294404	-0.315941	-0.266894		-0.230502	-0.293867	-0.183467		3	-0.292413	2.93037		3	-0.235946	2.04851
Q8VCT3	Rnpep	5.2e-20	72417	MOUSE	Aminopeptidase B	0.00459773	0.00189728	0.0313086		0.466415	0.450341	0.31938		3	0.0126012	0.807556		3	0.412045	2.20303
Q9Z2B9	Rps6ka4	1.4e-17	85652.7	MOUSE	Ribosomal protein S6 kinase alpha-4	-0.151969	-0.016332	-0.323396		-0.131359	-0.219415	-0.224547		3	-0.163899	0.986402		3	-0.191774	1.92118
Q8C050	Rps6ka5	2.4e-18	96584.3	MOUSE	Ribosomal protein S6 kinase alpha-5			0.722055		0.233014	0.477759	0.398836		1	0.722055	#DIV/0!		3	0.36987	1.74495
O08648	Map3k4	6.5e-25	179835	MOUSE	Mitogen-activated protein kinase kinase kinase 4	0.00633784	-0.170529	0.0344543		-0.730472	-0.406157	-0.482935		3	-0.0432457	0.545352		3	-0.539855	1.80523
Q5SQ20	Pes1	7.4e-22	68231.6	MOUSE	Pescadillo homolog	-0.346116	-0.323085	-0.140204		-0.679655	-0.718275	-0.534298		3	-0.269802	1.57152		3	-0.644076	2.42727
Q8R1U1	Cog4	1.3e-13	88661.5	MOUSE	Conserved oligomeric Golgi complex subunit 4	0.0757034	0.0821691	0.11654		0.285416	0.307731	0.23646		3	0.0914708	2.03014		3	0.276536	2.54188
Q04690	Nf1	1.1e-15	319598	MOUSE	Neurofibromin	0.279219	0.083613	-0.462571		0.253816	0.266823	-0.255385		3	-0.0332464	0.349364		3	0.0884179	0.482623
Q3TIR3	Ric8a	1.2e-18	59847.3	MOUSE	Synembryn-A	-0.0186846	0.167448	0.0805629		0.0189685	-0.0430767	-0.751063		3	0.0764422	0.837062		3	-0.258391	0.69327
Q5M9L1	Rpl36	3.8e-13	12296.8	MOUSE	60S ribosomal protein L36	-0.328562				-0.447569		0.304424		1	-0.328562	#DIV/0!		2	-0.0715723	0.356424
Q3U1V6	Uevld	5.3e-16	51681.8	MOUSE	Ubiquitin-conjugating enzyme E2 variant 3	0.0974006	0.124	0.104048		0.637477	0.231944	0.281611		3	0.108483	2.56993		3	0.383677	1.32227
Q80XE1	Ric8b	1.1e-16	58683	MOUSE	Synembryn-B			-0.449547						1	-0.449547	#DIV/0!		0	#DIV/0!	#DIV/0!
Q8BFY9	Tnpo1	1.1e-21	102358	MOUSE	Transportin-1	0.0329677	-0.0241684	-0.0204092		0.213721	0.129271	0.197629		3	-0.00386996	0.369932		3	0.180207	1.99957
Q99LG2	Tnpo2	5.2e-18	100457	MOUSE	Transportin-2	0.409623	0.46651	0.157652		0.953011	1.19995	0.698337		3	0.344595	1.46736		3	0.950434	1.95009
Q91YH5	Atl3	5.6e-20	60575.6	MOUSE	Atlastin-3	-0.0966184	0.17505	0.265412		0.619005	0.701987	0.614423		3	0.114615	0.69617		3	0.645138	3.01328
Q9D2R0	Aacs	6.9e-21	75200.9	MOUSE	Acetoacetyl-CoA synthetase	-0.0620126	0.145503	0.0231946		0.114804	0.164682	-0.0326757		3	0.0355617	0.512372		3	0.0822703	0.824781
Q9ESV0	Ddx24	2e-19	96430	MOUSE	ATP-dependent RNA helicase DDX24	-0.697822	-0.478745	-0.310383		-0.817891	-0.616278	-0.765776		3	-0.49565	1.62357		3	-0.733315	2.47362
Q8BIJ7	Rufy1	4.1e-15	80377.2	MOUSE	RUN and FYVE domain-containing protein 1	-0.0957119	0.0152424	-0.145898		-0.139055	-0.160089	-0.486828		3	-0.0754559	0.896466		3	-0.261991	1.13838
P61161	Actr2	3.5e-16	44761.2	MOUSE	Actin-related protein 2	-0.0740349	-0.096664	0.0625115		0.0588566	0.0863784	0.0687977		3	-0.0360625	0.565725		3	0.0713442	2.20475
Q3TLL4	Hgs	1.5e-18	85715.6	MOUSE	Putative uncharacterized protein	-0.0419102	-0.0597476	0.0665582		0.471513	0.143305	0.0291317		3	-0.0116999	0.400752		3	0.21465	0.908517
Q6NVE8	Wdr44	5.3e-18	101556	MOUSE	WD repeat-containing protein 44	0.0892073	0.177025	0.0319322		-0.122276	0.186144	0.00367882		3	0.0993882	1.14677		3	0.0225156	0.384619
P41230	Kdm5c	1e-15	175315	MOUSE	Lysine-specific demethylase 5C	-0.334477	-0.321129	-0.196065		-0.706061	-0.81533	-0.424375		3	-0.28389	1.93419		3	-0.648588	1.81302
Q3UXZ9	Kdm5a	7.3e-14	192218	MOUSE	Lysine-specific demethylase 5A			-0.0654348		-0.201499	-0.527926	0.0577305		1	-0.0654348	#DIV/0!		3	-0.223898	0.799607
Q80Y84	Kdm5b	7.4e-09	175557	MOUSE	Lysine-specific demethylase 5B	-0.0284542								1	-0.0284542	#DIV/0!		0	#DIV/0!	#DIV/0!
Q80WQ2	Vac14	1.1e-15	88048.4	MOUSE	Protein VAC14 homolog	0.0475629	0.268161	0.160089		0.188354	-0.38517	0.29446		3	0.158604	1.18568		3	0.0325482	0.350853
Q2M4H5	Cul5	6.9e-16	90975.1	MOUSE	Cullin 5	-0.0961383	-0.121561	-0.0282407		-0.00469419	0.066692	-0.1223		3	-0.08198	1.30692		3	-0.0201008	0.425845
Q3TR89	Cog1	2.3e-21	109052	MOUSE	Putative uncharacterized protein	0.408725	0.99573	0.149484		0.294235	0.158548	0.237389		3	0.51798	1.05949		3	0.230057	1.85357
Q9CQC6	Bzw1	2.7e-15	48043.6	MOUSE	Basic leucine zipper and W2 domain-containing protein 1	0.118556	0.0480372	0.0590321		0.248204	0.350385	0.113467		3	0.0752083	1.42386		3	0.237352	1.42973
Q2L4X1	Bzw2	6.9e-20	48063.6	MUSMM	Basic leucine zipper and W2 domain-containing protein 2	-0.00980615	0.0378069	0.000984949		-0.0365317	0.0250593	-0.0470237		3	0.0096619	0.543883		3	-0.0194987	0.622293
Q3ULB1	Tes	1.5e-18	46587.2	MOUSE	Testin	0.113713	0.0342222	-0.16778		0.39532	-0.0313224	0.214951		3	-0.00661492	0.325938		3	0.192983	0.887784
G3UXW9	Gps1	4.8e-26	58861.6	MOUSE	COP9 signalosome complex subunit 1	-0.0842017	0.0513126	0.0106636		0.0662131	0.102074	0.0944278		3	-0.00740851	0.361202		3	0.0875717	2.12047
Q059K7	Xk	5.2e-11	51115.1	MOUSE	Kell blood group (McLeod phenotype) homolog			-1.42689						1	-1.42689	#DIV/0!		0	#DIV/0!	#DIV/0!
Q99LJ0	Cttnbp2nl	1.1e-22	69841.7	MOUSE	CTTNBP2 N-terminal-like protein	0.0460336	0.212172	0.114429		0.355794	0.266212	0.332996		3	0.124212	1.20982		3	0.318334	2.45258
Q3TLX1	Nampt	6.7e-18	55463.4	MOUSE	Putative uncharacterized protein	-0.185914	0.0174699	0.000930817		-0.364887	-0.273018	-0.296332		3	-0.0558378	0.61791		3	-0.311412	2.41186
Q3UYC8	Adnp	3.2e-16	124196	MOUSE	Putative uncharacterized protein	-0.0993837	0.0289723	-0.156805		-0.4003	-0.0857772	-0.0940644		3	-0.0757387	0.821277		3	-0.19338	0.994357
H3BJI6	Ctage5	4.9e-19	84960.1	MOUSE	Cutaneous T-cell lymphoma-associated antigen 5 homolog	0.081624	0.407888	-0.0124196		0.324999	0.299052	0.0615065		3	0.159031	0.771963		3	0.228519	1.25038
Q3UAS2	Capza1	3e-21	32940	MOUSE	Putative uncharacterized protein	0.0352008	0.0298833	0.141037		0.0572445	-0.0529056	0.187171		3	0.0687072	1.00414		3	0.0638365	0.643337
P47754	Capza2	1.1e-16	32967.3	MOUSE	F-actin-capping protein subunit alpha-2	0.0651625	0.111678	0.0750733		0.125584	-0.806582	0.183334		3	0.0839711	1.86607		3	-0.165888	0.48375
Q9D0N7	Chaf1b	6.2e-19	63132.7	MOUSE	Chromatin assembly factor 1 subunit B	-0.0559181	0.071347	0.115125		-0.0150793	0.0309482	0.0248678		3	0.0435179	0.614753		3	0.0135789	0.651505
A2API8	Akap2	6.5e-22	101599	MOUSE	A-kinase anchor protein 2	0.32596	0.902537	0.229644		-0.182754	0.240121	0.172125		3	0.486047	1.13434		3	0.0764974	0.509621
Q3TXP6	Bcar1	9.6e-20	94362.7	MOUSE	Putative uncharacterized protein	-0.389648	-0.369187	-0.232313		-0.786404	-1.31469	-0.634571		3	-0.330382	1.96607		3	-0.911887	1.62452
Q7TQK5	Ccdc93	2.3e-15	72603.6	MOUSE	Coiled-coil domain-containing protein 93	0.210811	0.231344	0.108744		0.270243	0.460013	0.172268		3	0.183633	1.69814		3	0.300841	1.45235
Q8R307	Vps18	1.1e-14	110220	MOUSE	Vacuolar protein sorting-associated protein 18 homolog	0.552839	0.229392	0.182496		0.552673	0.522178	0.386883		3	0.321576	1.2601		3	0.487245	2.26934
Q8BU22	Kif2c	6.2e-17	81014	MOUSE	Putative uncharacterized protein	0.121162	0.320851	0.0676024		0.241256	0.239753	0.148532		3	0.169872	1.10153		3	0.209847	1.98532
P28740	Kif2a	6.8e-22	79757.1	MOUSE	Kinesin-like protein KIF2A	-0.187115	0.0283315	-0.187949		-0.0102778	0.035948	-0.289745		3	-0.115577	0.904043		3	-0.0880249	0.621486
Q3U8B3	Rpa1	7.1e-19	71446.6	MOUSE	Putative uncharacterized protein	0.105765	0.0974371	0.245892		0.478384	0.268627	0.533195		3	0.149698	1.3479		3	0.426735	1.77096
Q4ADG5	Prpf19	6.4e-23	57302.6	MOUSE	Prp19 beta protein	-0.05878	-0.271316	0.122368		0.0515608	0.027602	0.0477836		3	-0.0692426	0.5195		3	0.0423155	1.8308
Q91WN1	Dnajc9	9.7e-25	30059.2	MOUSE	DnaJ homolog subfamily C member 9	0.200687	-0.0957955	0.0113469		0.00964625	0.042002	-0.273419		3	0.0387462	0.456797		3	-0.0739237	0.570716
B1AXN9	Rps6ka3	1e-14	80670.2	MOUSE	Ribosomal protein S6 kinase alpha-3	0.109858	0.03784	0.106375		-0.0890674	-0.035294	-0.196208		3	0.0846911	1.46326		3	-0.106856	1.11815
Q8C0P0	Mastl	3.4e-17	95975.7	MOUSE	Serine/threonine-protein kinase greatwall	-0.806975	0.719802	0.382521		0.700733	0.772197	0.750494		3	0.0984492	0.370929		3	0.741141	3.3906
Q811L6	Mast4	6.6e-22	284007	MOUSE	Microtubule-associated serine/threonine-protein kinase 4	0.176852	1.14037	0.365761		0.964978	0.104147	0.295144		3	0.560995	1.00579		3	0.454756	0.951616
P18653	Rps6ka1	2.6e-17	81595.4	MOUSE	Ribosomal protein S6 kinase alpha-1	0.0960797	0.372666	0.0942288		0.805192	0.440189	0.0450058		3	0.187658	1.04657		3	0.430129	1.02429
O55047	Tlk2	2.4e-13	82261.7	MOUSE	Serine/threonine-protein kinase tousled-like 2	0.0489782	-0.412495			-0.0806687		-0.683433		2	-0.181759	0.541183		2	-0.382051	0.672434
Q60592	Mast2	8.9e-19	190536	MOUSE	Microtubule-associated serine/threonine-protein kinase 2	1.33344				-2.47445	-0.14933	-0.920739		1	1.33344	#DIV/0!		3	-1.18151	0.946665
Q8C0V0	Tlk1	2.8e-18	86624.2	MOUSE	Serine/threonine-protein kinase tousled-like 1			0.0791303		-0.338715		0.411478		1	0.0791303	#DIV/0!		2	0.0363816	0.328621
Q3U214	Mast3	1.7e-16	144175	MOUSE	Microtubule-associated serine/threonine-protein kinase 3		0.953922	0.175846			-0.00116203	0.306768		2	0.564884	0.716757		2	0.152803	0.59997
Q3UIZ0	Gak	6.8e-19	143646	MOUSE	Putative uncharacterized protein	0.106003	0.025175	0.119921		0.470079	0.203247	0.327941		3	0.0836997	1.27886		3	0.333756	1.60713
Q8R2U0	Seh1l	5.9e-29	39775.1	MOUSE	Nucleoporin SEH1	-0.11238	-0.039392	0.0953516		-0.0577082	-0.110558	-0.0225543		3	-0.0188068	0.405346		3	-0.0636068	1.18472
O88974	Setdb1	3.7e-16	144550	MOUSE	Histone-lysine N-methyltransferase SETDB1	0.260854	-0.256225	-0.0670437		-0.191969	-0.435874	-0.188375		3	-0.0208049	0.345312		3	-0.272073	1.39839
P40336	Vps26a	3.5e-21	38114.1	MOUSE	Vacuolar protein sorting-associated protein 26A	0.122881	0.0250626	0.141732		0.138759	0.156705	0.239272		3	0.0965587	1.23552		3	0.178245	1.84086
Q8C0E2	Vps26b	3.6e-16	39124.9	MOUSE	Vacuolar protein sorting-associated protein 26B	0.301501	0.548105	0.0272024		-0.133468	-0.597557	-0.0480781		3	0.292269	1.01881		3	-0.259701	0.873545
Q9DC48	Cdc40	8.6e-16	65461.8	MOUSE	Pre-mRNA-processing factor 17	-0.0684534	0.0707301	-0.116915		-0.404004	-0.119566	-0.404833		3	-0.0382128	0.547498		3	-0.309468	1.38385
A2ADB0	Spen	2.9e-19	398537	MOUSE	Msx2-interacting protein	-0.298843	-0.310313	-0.208217		-0.406528	0.0329615	-0.0161881		3	-0.272458	2.16252		3	-0.129918	0.649058
Q8BLH7	Hirip3	2.5e-24	65215.4	MOUSE	HIRA-interacting protein 3	-0.221885	0.365705	-0.100838		-0.831866	-0.508116			3	0.0143275	0.326273		2	-0.669991	1.12228
P28659	Celf1	1.1e-28	52107.7	MOUSE	CUGBP Elav-like family member 1	-0.230615	-0.282094	0.0265462		-0.151682	-0.256529	-0.117028		3	-0.162054	0.936126		3	-0.17508	1.57788
Q9JMH6	Txnrd1	1.5e-21	67084.4	MOUSE	Thioredoxin reductase 1, cytoplasmic	-0.287075	-0.194166	-0.102781		0.0165075	-0.295479	-0.214082		3	-0.194674	1.4734		3	-0.164351	0.957341
P06745	Gpi	4e-19	62767.5	MOUSE	Glucose-6-phosphate isomerase	0.0279516	0.0614215	0.118905		0.23174		0.142892		3	0.0694262	1.22016		2	0.187316	1.13006
B2RXT5	Gpi1	7.3e-17	38283.1	MOUSE	Glucose-6-phosphate isomerase						0.232346			0	#DIV/0!	#DIV/0!		1	0.232346	#DIV/0!
Q8CHI8	Ep400	3.3e-16	337182	MOUSE	E1A-binding protein p400	0.0542453	-0.130651	-0.234792		-0.124152	-0.414942	-0.500775		3	-0.103733	0.763782		3	-0.346623	1.3315
Q9CT10	Ranbp3	2.7e-19	52573.1	MOUSE	Ran-binding protein 3	-0.086461	-0.0300915	-0.0824092		-0.126354	-0.303218	-0.00504074		3	-0.0663206	1.4722		3	-0.144871	0.927709
P68040	Gnb2l1	2.7e-24	35077	MOUSE	Guanine nucleotide-binding protein subunit beta-2-like 1	-0.195657	-0.264493	-0.110556		-0.353414	-0.223155	-0.271661		3	-0.190235	1.5965		3	-0.282743	2.05563
Q9R1P0	Psma4	4.5e-37	29471	MOUSE	Proteasome subunit alpha type-4	0.0550326	-0.0685627	-0.041615		0.130597	0.212222	0.166263		3	-0.0183817	0.473221		3	0.169694	2.02601
P24788	Cdk11b	1.2e-13	91514.2	MOUSE	Cyclin-dependent kinase 11B	0.0288809	0.398129	-0.0369764		0.0687753	0.21719	0.0525352		3	0.130011	0.659282		3	0.112834	1.08594
Q8C0C7	Farsa	3.6e-18	57599.4	MOUSE	Phenylalanine--tRNA ligase alpha subunit	-0.108342	0.182086	-0.0175636		0.0400182	0.136349	-0.00720397		3	0.018727	0.372923		3	0.0563879	0.804688
Q6P8N8	Clpx	9.4e-23	67336.1	MOUSE	ATP-dependent Clp protease ATP-binding subunit clpX-like, mitochondrial	-0.0830221	-0.165337	0.0311717		-0.0884546	-0.0210984	0.289288		3	-0.0723957	0.780339		3	0.0599117	0.482936
Q99PU8	Dhx30	1.3e-17	136670	MOUSE	Putative ATP-dependent RNA helicase DHX30	0.0517088	0.00223622	0.026938		0.044095	0.0143891	0.0318612		3	0.026961	1.00073		3	0.0301151	1.43735
Q9ER73	Elp4	1.1e-18	46325.6	MOUSE	Elongator complex protein 4	0.0922835	0.333319	-0.0150614		-0.0765967	0.135825	-0.624434		3	0.136847	0.802276		3	-0.188402	0.608199
Q8VDC1	Fyco1	1.7e-17	162338	MOUSE	FYVE and coiled-coil domain-containing protein 1	0.343487	-0.0562326	0.107646		0.557438	0.507246	0.404739		3	0.131633	0.727929		3	0.489807	2.38136
Q3UZ17	Luc7l2	4.2e-19	45405	MOUSE	Putative uncharacterized protein	-0.322705	0.0890636	0.0392518		-0.116864	0.198101	-0.379401		3	-0.0647966	0.476883		3	-0.099388	0.514278
Q9CYI4	Luc7l	6.3e-18	43934.5	MOUSE	Putative RNA-binding protein Luc7-like 1	-0.255515		-0.141553		-0.300877	0.311792	-0.0131925		2	-0.198534	1.05078		3	-0.000759177	0.302349
O08715	Akap1	6.4e-18	92195.5	MOUSE	A-kinase anchor protein 1, mitochondrial	-0.201625	-0.226548	-0.204611		-0.119699	-0.227285	-0.377387		3	-0.210928	3.15962		3	-0.241457	1.37728
Q6PAJ1	Bcr	1e-24	143073	MOUSE	Breakpoint cluster region protein	-0.00999057	0.10517	0.308682		-0.0461623	0.126441	0.234412		3	0.134621	0.845692		3	0.104897	0.785346
Q8BJW5	Nol11	8.3e-29	80818.5	MOUSE	Nucleolar protein 11	-0.289757	-0.306136	-0.292176		-0.395495	-0.610226	-0.478019		3	-0.296023	3.82797		3	-0.49458	2.10748
Q61103	Dpf2	9.7e-30	44230	MOUSE	Zinc finger protein ubi-d4	-0.12094	0.205884	0.0963258		-0.157653	-0.349456	0.219779		3	0.0604233	0.527588		3	-0.0957766	0.505428
Q8BZ21	Kat6a	2.6e-17	224921	MOUSE	Histone acetyltransferase KAT6A	0.104867	0.247946	-0.328396		-0.386999	-0.226848	-0.438163		3	0.00813902	0.315692		3	-0.35067	1.80409
Q6GTK4	Dpf1	2e-12	44397.9	MOUSE	D4, zinc and double PHD fingers family 1	0.0213273				0.199355	0.0725098	-0.550031		1	0.0213273	#DIV/0!		3	-0.092722	0.439151
Q6PAV2	Herc4	1.2e-18	118413	MOUSE	Probable E3 ubiquitin-protein ligase HERC4	-0.203508	-0.266115	-0.0766303		-0.178148	-0.169082	-0.191912		3	-0.182085	1.38562		3	-0.179714	3.16718
Q99MR8	Mccc1	3.2e-17	79344.5	MOUSE	Methylcrotonoyl-CoA carboxylase subunit alpha, mitochondrial	0.490042	0.135613	0.28865		0.746398	0.576422	-0.222525		3	0.304768	1.31355		3	0.366765	0.763971
Q99L48	Nmd3	5.1e-18	57611.7	MOUSE	60S ribosomal export protein NMD3	-0.284739	-0.191079	-0.0915512		-0.380919	-0.168267	-0.291571		3	-0.189123	1.4142		3	-0.280252	1.6465
Q14B71	Cdca2	2.9e-19	106367	MOUSE	Cell division cycle-associated protein 2	0.141769	0.112961	0.525084		-0.260591	-0.126147	-0.0303233		3	0.259938	1.02342		3	-0.13902	1.06341
Q3T9S3	Set	3.1e-22	33378	MOUSE	SET translocation	-0.182752	-0.290831	-0.140729		-0.163542	-0.251816	-0.189068		3	-0.204771	1.65258		3	-0.201475	2.08286
Q9EQJ9	Magi3	4.5e-23	161673	MOUSE	Membrane-associated guanylate kinase, WW and PDZ domain-containing protein 3	0.0905988	0.0560838	-0.124558		-0.14288	-0.00380524	-0.042234		3	0.007375	0.336266		3	-0.062973	0.872628
Q05769	Ptgs2	5.5e-21	69013.8	MOUSE	Prostaglandin G/H synthase 2	0.0760976	0.291274	0.119587		0.577159	0.801906	1.52514		3	0.162319	1.18017		3	0.968069	1.41289
P22437	Ptgs1	2e-17	69043	MOUSE	Prostaglandin G/H synthase 1	0.344093	0.358263	0.465074		1.11029	1.92913	0.47978		3	0.389143	2.32368		3	1.17307	1.26898
Q9WVM1	Racgap1	1e-17	70159.1	MOUSE	Rac GTPase-activating protein 1	-0.521245	-0.215487	-0.16951		-0.19915	-0.339445	-0.742086		3	-0.302081	1.25333		3	-0.426894	1.22277
Q6PAQ4	Rexo4	5e-19	47599.4	MOUSE	RNA exonuclease 4	0.0893286	-0.182286	-0.426106		-0.489122	-0.715741	-1.5089		3	-0.173021	0.738656		3	-0.904587	1.30255
Q3UJ44	Capg	1.2e-20	38670.1	MOUSE	Putative uncharacterized protein	0.306839	0.428482	0.381421		0.990562	1.02616	0.851539		3	0.372247	2.3502		3	0.956087	2.811
A2AHC3	Camsap1	4.3e-20	175889	MOUSE	Calmodulin-regulated spectrin-associated protein 1	-0.0769706	0.107098	-0.114074		0.061999	0.010249	-0.116847		3	-0.0279824	0.442459		3	-0.0148664	0.394739
Q8VBX6	Mpdz	2e-17	218713	MOUSE	Multiple PDZ domain protein	-0.0519023	-0.251172	-0.0935923		-0.0119951	-1.9422	0.0188401		3	-0.132222	1.09372		3	-0.64512	0.672925
Q3UVL4	Vps51	1.4e-19	86188.2	MOUSE	Vacuolar protein sorting-associated protein 51 homolog	0.202138	0.174016	0.139946		0.238275	0.35135	0.274569		3	0.172033	2.26969		3	0.288064	2.1829
Q8BIJ6	Iars2	2.8e-15	112805	MOUSE	Isoleucine--tRNA ligase, mitochondrial	-0.169093	-0.242988	-0.0711567		0.0985467	0.0996807	0.0797031		3	-0.161079	1.37858		3	0.0926435	2.61489
Q3UDA4	Smarcb1	9.4e-24	43158.4	MOUSE	SWI/SNF related, matrix associated, actin dependent regulator of chromatin, subfamily b, member 1, isoform CRA_b	0.0595795	-0.103638	-0.0498229		0.0496552	-0.118812	-0.0330255		3	-0.0312936	0.536494		3	-0.0340607	0.555781
Q6NZL1	Dhx37	6.8e-20	128329	MOUSE	DEAH (Asp-Glu-Ala-His) box polypeptide 37	-0.331497	-0.370952	-0.178613		-0.443045	-0.327325	-0.326641		3	-0.293687	1.72529		3	-0.36567	2.25928
Q3UK41	Nelfa	1.1e-15	57589.6	MOUSE	Putative uncharacterized protein	-0.721347	-0.18177	-0.105237		-0.340061	-0.270299	-0.109613		3	-0.336118	0.948625		3	-0.239991	1.44259
Q9CVB6	Arpc2	1e-16	34357.4	MOUSE	Actin-related protein 2/3 complex subunit 2	-0.061936	-0.00484731	0.0873989		0.0898238	0.107547	0.0626754		3	0.00687185	0.352128		3	0.0866821	1.96025
Q6P1G0	Heatr6	4.3e-26	128924	MOUSE	HEAT repeat-containing protein 6	0.330941	0.426259	-0.0112456		0.234785	0.40643	-0.511402		3	0.248652	0.995461		3	0.0432712	0.350651
E9Q449	Dennd4c	7.2e-17	178676	MOUSE	DENN domain-containing protein 4C	0.101415	0.00572496	-0.110424		-0.104279	-0.528192	-0.246888		3	-0.00109485	0.306554		3	-0.293119	1.14621
O89050	Mkln1	1e-15	84878.8	MOUSE	Muskelin	-0.354904	-0.527151	-0.301349		-0.806516	-1.02496	-0.915213		3	-0.394468	1.84543		3	-0.915562	2.62799
E9PWD4	Trmt1	2.9e-21	71646.6	MOUSE	tRNA (guanine(26)-N(2))-dimethyltransferase	0.117164	-0.540678	-0.225623		-0.156602	0.143838	-0.113679		3	-0.216379	0.729649		3	-0.0421476	0.457652
Q3UKC1	Tax1bp1	9.5e-23	93631.1	MOUSE	Tax1-binding protein 1 homolog	-0.593129	-0.639868	-0.483563		-0.788264	-1.13432	-0.856401		3	-0.572187	2.4888		3	-0.92633	2.19366
P03958	Ada	4.8e-17	39992	MOUSE	Adenosine deaminase	-0.0227288	0.0131536	-0.00552427		0.159081	0.195012	0.158907		3	-0.00503314	0.471635		3	0.171	2.61141
Q3TDF8	Etf1	1.6e-19	49004.3	MOUSE	Putative uncharacterized protein	-0.171016	-0.199713	-0.0979386		-0.275943	-0.238486	-0.314035		3	-0.156223	1.74942		3	-0.276155	2.51008
O88720	Rbm6	1.1e-17	128094	MOUSE	RNA binding protein	-0.0293126	1.32845	-0.120584		-0.253915	-0.557479	-0.0318263		3	0.392851	0.61082		3	-0.281073	0.986435
Q922Q2	Riok1	1.9e-19	64911	MOUSE	Serine/threonine-protein kinase RIO1	0.0226268	0.125054	-0.289632		-0.611053	-0.529395	-0.317468		3	-0.047317	0.431281		3	-0.485972	1.81087
Q99JB2	Stoml2	4.4e-19	38385.2	MOUSE	Stomatin-like protein 2, mitochondrial	-0.0340071	-0.337373	-0.0837609		0.0571464	0.045507	0.071186		3	-0.151714	0.907186		3	0.0579465	2.09638
P12970	Rpl7a	8e-18	29976.8	MOUSE	60S ribosomal protein L7a	-0.290237	-0.244768	-0.0513382		-0.390436	-0.21058	-0.27824		3	-0.195448	1.23504		3	-0.293085	1.81583
F6YI27	Gm17415	1.4e-12	30212	MOUSE	Protein Gm17415			-3.75156						1	-3.75156	#DIV/0!		0	#DIV/0!	#DIV/0!
P97368	Meis3	5.9e-08	41726.8	MOUSE	Homeobox protein Meis3			0.12109		0.128335		5.82082		1	0.12109	#DIV/0!		2	2.97458	0.614424
Q9R0P3	Esd	1.1e-26	31319.9	MOUSE	S-formylglutathione hydrolase	-0.300256	-0.220022	-0.0238193		0.380986	-0.756241	-0.0130733		3	-0.181366	1.10287		3	-0.129443	0.434586
Q8CJ53	Trip10	3.3e-17	68489.9	MOUSE	Cdc42-interacting protein 4	-0.125247	-0.112935	0.0445939		0.0508521	0.0277992	0.0391834		3	-0.0645292	0.745598		3	0.0392782	1.86127
F8VPN4	Agl	4e-23	174289	MOUSE	Protein Agl	0.0889241	0.12791	0.126844		0.595892	0.608575	0.620774		3	0.114559	2.21129		3	0.608414	4.15687
Q3UE37	Ube2z	4.5e-17	38368.7	MOUSE	Ubiquitin-conjugating enzyme E2 Z	-0.11601	-0.120859	-0.0123917		0.100601	0.147573	-0.150052		3	-0.0830868	1.14476		3	0.0327075	0.421852
P12382	Pfkl	1.8e-16	85360.6	MOUSE	6-phosphofructokinase, liver type	0.105051	0.172697	0.0267956		0.130442	0.109234	0.150629		3	0.101514	1.16209		3	0.130102	2.38026
P47857	Pfkm	1.7e-19	85269.4	MOUSE	6-phosphofructokinase, muscle type	2.65045		0.24956		0.533144	5.47352	5.11315		2	1.45	0.657347		3	3.7066	1.13953
Q8C605	Pfkp	1.8e-16	85547.9	MOUSE	6-phosphofructokinase	0.231859	0.234042	0.103812		0.408613	0.529069	0.337768		3	0.189904	1.62213		3	0.42515	2.07529
Q69ZF7	Cnnm4	1.3e-21	86626.7	MOUSE	Metal transporter CNNM4		-0.216255	-0.336841		0.665112	-0.954548	0.139478		2	-0.276548	1.1654		3	-0.0499863	0.334367
Q3UCW0	Tsg101	2.2e-23	44124	MOUSE	MCG123182	0.318787	0.167289	0.0732186		0.514174	0.507471	0.354723		3	0.186431	1.21803		3	0.458789	2.19939
Q8C0E3	Trim47	1.2e-18	69913	MOUSE	Tripartite motif-containing protein 47	0.0430073	0.12551	0.207651		-0.615049	-0.411775	-0.248083		3	0.125389	1.22678		3	-0.424969	1.54447
Q540D7	Akr1a1	2.7e-22	36587.2	MOUSE	Aldehyde reductase	0.0132629	-0.00422667	0.111689		0.201153	0.381378	0.336798		3	0.0402416	0.720413		3	0.306443	1.82562
Q8C1D8	Iws1	2.6e-27	85249	MOUSE	Protein IWS1 homolog	0.250234	0.0490577	-0.19265		-0.406915	-0.0600437	0.0200918		3	0.0355471	0.393969		3	-0.148956	0.728736
Q8BFZ9	Erlin2	2.5e-17	37872.9	MOUSE	Erlin-2	0.227813	-0.0388903	-0.00942501		0.571567	0.628892	0.327821		3	0.0598326	0.559126		3	0.509427	1.80557
Q91X78	Erlin1	1.9e-15	38937	MOUSE	Erlin-1	0.389541	0.0200607	0.247765		0.694338	0.941252	0.332929		3	0.219122	1.04897		3	0.656173	1.48522
Q3TAI4	Tpd52l2	4.2e-17	22466.3	MOUSE	Tumor protein D52-like 2, isoform CRA_c	0.0664215	0.178044	0.229222		0.162231	0.058978	0.0900293		3	0.157896	1.3899		3	0.103746	1.4145
Q91Z67	Srgap2	2.4e-15	120800	MOUSE	SLIT-ROBO Rho GTPase-activating protein 2	0.0629674	0.00976445	-0.408348		0.0802405	0.10347	-0.453493		3	-0.111872	0.575807		3	-0.0899276	0.474946
Q91Z69	Srgap1	6.2e-11	121431	MOUSE	SLIT-ROBO Rho GTPase-activating protein 1			-0.0948884				-0.428269		1	-0.0948884	#DIV/0!		1	-0.428269	#DIV/0!
Q812A2	Srgap3	2e-10	124421	MOUSE	SLIT-ROBO Rho GTPase-activating protein 3		0.173258	0.463457		-1.79433	-0.109324	-1.98997		2	0.318357	0.866065		3	-1.29788	1.09223
Q80TQ2	Cyld	7.9e-18	106586	MOUSE	Ubiquitin carboxyl-terminal hydrolase CYLD	0.1157	0.196066	0.0375737		-0.0539279	0.42764	0.0895696		3	0.116447	1.20105		3	0.154427	0.707273
A2AQ19	Rtf1	1.9e-13	80797.7	MOUSE	RNA polymerase-associated protein RTF1 homolog	0.0149737	-0.00897125	-0.187756		-0.0661802	-0.0821107	-0.326336		3	-0.0605844	0.654129		3	-0.158209	0.997872
P70677	Casp3	1.7e-33	31475.1	MOUSE	Caspase-3	0.0371114	0.0267395	0.0446567		0.157679	0.236897	0.173601		3	0.0361692	1.99995		3	0.189392	2.09885
Q80UL3	Galk1	4.7e-20	42309.6	MOUSE	Galactokinase 1	-0.0259338	0.055758	0.12393		0.0461176	0.0424276	0.0542507		3	0.0512515	0.746714		3	0.0475986	2.57345
Q05DE0	Arfgap1	8.8e-28	43308.3	MOUSE	ADP-ribosylation factor GTPase activating protein 1, isoform CRA_d (Fragment)	0.110263	0.740346	-0.0749293		-0.0577906	0.0235972	0.209004		3	0.25856	0.693929		3	0.0582703	0.570812
Q80WC3	Tnrc18	1.3e-16	307638	MOUSE	Trinucleotide repeat-containing gene 18 protein	-0.280595	0.0402707	-0.113622		0.255286	-1.36379	-0.443483		3	-0.117982	0.781385		3	-0.517329	0.715734
Q5FWK3	Arhgap1	9e-19	50411.1	MOUSE	Rho GTPase-activating protein 1	0.144713	0.310025	0.0998329		0.556766	0.650622	0.382212		3	0.184857	1.29399		3	0.529866	1.97212
E9QL65	Cog3	3.1e-13	94145.6	MOUSE	Conserved oligomeric Golgi complex subunit 3	0.10129	0.135236	0.107948		0.367217	0.291756	0.0662883		3	0.114824	2.39355		3	0.241754	1.23661
Q99LX0	Park7	3.3e-20	20021.5	MOUSE	Protein DJ-1	-0.0586148	-0.0250718	-0.0141103		0.101523	0.0936516	0.159788		3	-0.032599	1.16987		3	0.118321	1.8283
O08917	Flot1	1.1e-14	47513.9	MOUSE	Flotillin-1	0.266281	0.0536285	0.189398		0.461097	-0.0857522	-0.164475		3	0.169769	1.25178		3	0.0702901	0.423059
Q2YDW2	Msto1	8.7e-24	61230.9	MOUSE	Protein misato homolog 1	0.130222	-0.218487	0.0346305		0.0305503	0.220588	0.0623135		3	-0.017878	0.356859		3	0.104484	0.963747
Q8R4H2	Arhgef12	4.8e-17	172350	MOUSE	Rho guanine nucleotide exchange factor 12	0.233928	0.119867	0.0630059		0.304093	0.0696568	0.304908		3	0.138933	1.26075		3	0.226219	1.29333
Q3V141	Papola	2.3e-15	82261.7	MOUSE	Putative uncharacterized protein (Fragment)	2.40083		-0.184559		-0.336256	-0.246961	-0.321845		2	1.10813	0.561582		3	-0.301687	2.38133
Q6PCL9	Papolg	3.9e-14	82957.6	MOUSE	Poly(A) polymerase gamma	-0.337158	0.166433	-0.314406		-0.432883	-0.283457	0.261713		3	-0.161711	0.669042		3	-0.151542	0.562777
Q80U87	Usp8	1.1e-16	122612	MOUSE	Ubiquitin carboxyl-terminal hydrolase 8	0.17296	0.281039	0.308889		0.323592	0.311725	0.430364		3	0.254296	1.89346		3	0.355227	2.25607
P98192	Gnpat	1e-20	76870.4	MOUSE	Dihydroxyacetone phosphate acyltransferase	-0.00256707	-0.261757	0.141022		0.155032	0.0898427	0.238019		3	-0.0411007	0.419884		3	0.160965	1.49349
Q3TQ21	Pum1	1.3e-15	126549	MOUSE	Putative uncharacterized protein	-0.0385883	0.176241	-0.430011		-0.513689	-0.406859	-0.262877		3	-0.0974527	0.496185		3	-0.394475	1.79184
Q3UR91	Pum2	1.4e-17	114102	MOUSE	Pumilio homolog 2	-0.0314394	0.0102969	-0.0586344		-0.243801	0.101659	-0.0793872		3	-0.0265923	0.801546		3	-0.0738429	0.571631
P22682	Cbl	4.6e-18	100565	MOUSE	E3 ubiquitin-protein ligase CBL	0.155504	1.79398	-0.0198349		0.088173	0.144066	0.142825		3	0.643217	0.719712		3	0.125021	1.97794
Q925J9	Med1	2.9e-16	167142	MOUSE	Mediator of RNA polymerase II transcription subunit 1	-0.15833	0.0485477	0.0258709		-0.32205	-1.08023	0.177629		3	-0.0279705	0.449181		3	-0.408218	0.720802
Q6NV99	Haus6	2.4e-15	105606	MOUSE	Protein Haus6	-0.0565846	0.236761	-0.243533		-0.118189	0.182358	-0.258371		3	-0.0211188	0.349805		3	-0.0647338	0.476324
Q6NWV4	Mcm3ap	5.3e-18	192841	MOUSE	Mcm3ap protein (Fragment)	-0.104468	-0.11938	-0.100878		-0.596764	-0.441792	-0.365711		3	-0.108242	2.86528		3	-0.468089	1.99037
Q8R016	Blmh	5.2e-19	52511.6	MOUSE	Bleomycin hydrolase	-0.061483	-0.0167426	-0.00852621		-0.275214	-0.187291	-0.331757		3	-0.0289173	0.956774		3	-0.264754	1.91564
Q60751	Igf1r	1.3e-16	155790	MOUSE	Insulin-like growth factor 1 receptor	-0.125576	-0.202777	0.185317		0.0159852	0.0996843	0.0190311		3	-0.0476787	0.439741		3	0.0449002	0.915394
P15208	Insr	6.3e-13	155612	MOUSE	Insulin receptor		0.805024							1	0.805024	#DIV/0!		0	#DIV/0!	#DIV/0!
O35382	Exoc4	4.8e-16	110546	MOUSE	Exocyst complex component 4	0.0982328	-0.0727117	0.0816284		-0.0592745	0.015962	-0.171047		3	0.0357165	0.538295		3	-0.0714531	0.797264
Q80U70	Suz12	1.6e-20	83026.5	MOUSE	Polycomb protein Suz12	-0.337642	-0.130101	-0.120028		-0.164073	-0.417272	-0.380808		3	-0.195924	1.26022		3	-0.320718	1.55524
Q8BY02	Nkrf	9.5e-17	77739.9	MOUSE	NF-kappa-B-repressing factor	-0.174074	-0.412014	-0.178477		-0.727669	-0.379493	-0.301997		3	-0.254855	1.38		3	-0.46972	1.45814
O35841	Api5	5.5e-16	56785.7	MOUSE	Apoptosis inhibitor 5	-0.0535212	-0.13496	0.0220052		-0.120624	-0.109447	0.0153876		3	-0.0554919	0.762634		3	-0.0715611	0.916527
Q91VA7	Idh3b	3e-19	42195.1	MOUSE	Isocitrate dehydrogenase 3 (NAD+) beta	-0.0262357	0.192105	0.123197		0.367266	0.371302	0.287231		3	0.0963555	0.864091		3	0.341933	2.49833
O70475	Ugdh	4.5e-17	54832.5	MOUSE	UDP-glucose 6-dehydrogenase	-0.0104538	0.091136	0.0655738		0.443744	0.521994	0.402643		3	0.048752	0.901098		3	0.456127	2.53475
P35951	Ldlr	4.4e-23	94948.2	MOUSE	Low-density lipoprotein receptor	-0.451978	-0.402148	-0.885813		-0.966018	-0.905837	0.69812		3	-0.57998	1.49811		3	-0.391245	0.562778
Q3TLR3	Trim32	2.4e-20	72058.1	MOUSE	Tripartite motif protein 32, isoform CRA_b	-0.134385	-0.0488959	0.0355963		-0.200127	0.181399	0.0997756		3	-0.0492281	0.676327		3	0.027016	0.378049
Q8R3N6	Thoc1	7.4e-18	75436.6	MOUSE	THO complex subunit 1	-0.190747	-0.268255	-0.0744008		-0.155076	-0.268299	-0.0502944		3	-0.177801	1.35941		3	-0.15789	1.19072
Q8BKT7	Thoc5	2e-21	78686.7	MOUSE	THO complex subunit 5 homolog	-0.105206	-0.178318	-0.0266179		-0.217349	-0.144454	-0.0819151		3	-0.103381	1.14813		3	-0.147906	1.4988
Q9DC23	Dnajc10	1.5e-22	90583.9	MOUSE	DnaJ homolog subfamily C member 10	0.156644	0.00521532	0.116872		0.384452	0.510269	-0.0897085		3	0.0929104	1.05333		3	0.268337	0.854503
Q3UH70	Brd4	5.4e-15	156053	MOUSE	Bromodomain-containing protein 4	-0.210623	-0.027347	-0.0457445		-0.0898182	-0.00621915	-0.0126072		3	-0.0945715	0.909995		3	-0.0362148	0.809621
Q7JJ13	Brd2	4.1e-18	88067.6	MOUSE	Bromodomain-containing protein 2	-0.173469	-0.337069	-0.171551		-0.107094	-0.129051	-0.292097		3	-0.227363	1.57206		3	-0.17608	1.32553
Q3TUI3	Brd3	6.8e-22	79762.3	MOUSE	Bromodomain containing 3, isoform CRA_d	0.192687	0.0628533	0.0984684		0.132276	0.16976	0.0459806		3	0.118003	1.33276		3	0.116006	1.36165
Q5BLK4	Zcchc6	2.6e-23	169104	MOUSE	Terminal uridylyltransferase 7	0.136595	0.344192	-0.0199862		0.0770623	-0.162437	-0.0446945		3	0.1536	0.849855		3	-0.0433565	0.526767
A2A8R7	Zcchc11	2.4e-08	185128	MOUSE	Terminal uridylyltransferase 4	0.0886793	0.553698	0.410966		0.755799	1.74445	0.408349		3	0.351115	1.20325		3	0.969533	1.16623
Q80Y98	Ddhd2	1.5e-18	79577.5	MOUSE	Phospholipase DDHD2	0.194297	0.25417	0.160676		0.48319	0.488218	0.65502		3	0.203048	2.05419		3	0.542143	2.27281
Q3ULG4	Psmd4	2e-17	41046.4	MOUSE	Putative uncharacterized protein	-0.0122186	0.810436	-0.119104		-0.0911745	0.0881858	0.112612		3	0.226371	0.583861		3	0.0365412	0.503856
Q80U76	Rrs1	9e-16	42319.1	MOUSE	MKIAA0112 protein (Fragment)	-0.243858	-0.416488	-0.328068		-1.01585	-0.808439	-0.81995		3	-0.329471	1.95613		3	-0.881415	2.53911
Q8VI84	Noc3l	1.8e-17	93212.2	MOUSE	Nucleolar complex protein 3 homolog	-0.29552	-0.462174	-0.250376		-0.634573	-0.728441	-0.587456		3	-0.336023	1.75906		3	-0.650157	2.6949
P50431	Shmt1	2.1e-18	52601.4	MOUSE	Serine hydroxymethyltransferase, cytosolic	-0.0566786	0.69292	-0.0647259		0.230168	0.288182	0.00675255		3	0.190505	0.578862		3	0.175034	1.05028
Q8CCP0	Nemf	5.8e-25	121189	MOUSE	Nuclear export mediator factor Nemf	-0.100426	-0.0539248	-0.130986		-0.326348	-0.19539	-0.643758		3	-0.0951122	1.59129		3	-0.388498	1.30068
P16045	Lgals1	4.8e-19	14866	MOUSE	Galectin-1	-0.0464981	-0.0170067	-0.104218		-0.0103551	-0.0749327	-0.0445378		3	-0.0559077	1.09491		3	-0.0432752	1.13629
Q640N1	Aebp1	1e-19	128366	MOUSE	Adipocyte enhancer-binding protein 1	-0.0677303	-0.0897683	0.165436		0.14534	0.136812	-0.0122005		3	0.00264594	0.311096		3	0.089984	0.957384
Q8CIG8	Prmt5	1.1e-12	72680.5	MOUSE	Protein arginine N-methyltransferase 5	-0.156213	-0.23664	-0.127975		-0.153298	-0.0706292	0.0192238		3	-0.173609	1.7772		3	-0.0682344	0.817744
Q3U343	Zfp622	4.2e-20	53407.6	MOUSE	Putative uncharacterized protein	-0.0689902	-0.0435795	0.0641116		-0.117633	0.131987	-0.124665		3	-0.0161527	0.437467		3	-0.0367701	0.452471
G5E8J0	Notch2	1.9e-27	265636	MOUSE	Neurogenic locus notch homolog protein 2	-0.00291169	0.469316	-0.293238		-0.106516	-0.362367	-0.496364		3	0.0577223	0.387566		3	-0.321749	1.2736
Q01705	Notch1	3.5e-09	270838	MOUSE	Neurogenic locus notch homolog protein 1	-0.84765				1.69828				1	-0.84765	#DIV/0!		1	1.69828	#DIV/0!
Q80Y44	Ddx10	1.3e-21	100739	MOUSE	Probable ATP-dependent RNA helicase DDX10	-0.00916927	0.041734	-0.720934		-0.78396	-1.00451	-0.774484		3	-0.229456	0.648112		3	-0.854319	2.41745
Q9DBG5	Plin3	2.8e-18	47262.6	MOUSE	Perilipin-3	0.398507	1.58462	0.00276076		0.731797	0.685218	-0.61311		3	0.661962	0.826377		3	0.267968	0.519247
Q7TPN1	Cc2d1b	7.5e-20	85389.5	MOUSE	Cc2d1b protein (Fragment)	0.0607873	0.157176	-0.00965349		0.195262	0.538789	0.0421952		3	0.0694365	0.842388		3	0.258749	0.958447
A8C756	Thada	3.6e-20	217291	MOUSE	Thyroid adenoma-associated protein homolog	-0.198321	0.805523	-0.182375		-0.481493	-0.789933	-0.194058		3	0.141609	0.449017		3	-0.488494	1.28029
Q8C570	Rae1	1e-20	40965.5	MOUSE	mRNA export factor	-0.116284	-0.114087	0.0376211		-0.174686	-0.28142	-0.188463		3	-0.0642501	0.776773		3	-0.214856	1.93026
Q8K0G5	Tssc1	4.9e-19	43127.3	MOUSE	Protein TSSC1	0.240061	0.288339	0.243085		0.114794	-0.450026	0.0875764		3	0.257162	2.73687		3	-0.0825519	0.457507
Q9QUM9	Psma6	1.7e-21	27372.7	MOUSE	Proteasome subunit alpha type-6	0.0985909	-0.092454	-0.0881096		0.0182959	0.110441	0.127718		3	-0.0273242	0.451815		3	0.085485	1.19319
Q540H0	Naa10	4.2e-17	26519.9	MOUSE	N-acetyltransferase ARD1 homolog (S. cerevisiae), isoform CRA_e	-0.121748	0.0751832	0.189335		-0.123028	-0.34597	0.000740925		3	0.0475901	0.486332		3	-0.156086	0.879844
Q9CQX6	Gm16286	4.2e-17	24768	MOUSE	MCG141091, isoform CRA_a	-0.41771	-0.457501	-0.186537		-0.137346	-0.403506	-0.615693		3	-0.353916	1.58069		3	-0.385515	1.26636
Q3UA32	Galnt2	1.1e-19	61362.2	MOUSE	Putative uncharacterized protein (Fragment)	-0.134833	-1.16779	-0.152753		-0.142671	-0.472193	-0.375008		3	-0.485125	0.836874		3	-0.329958	1.4107
O08832	Galnt4	5.8e-12	66555.5	MOUSE	Polypeptide N-acetylgalactosaminyltransferase 4	0.120597	-0.138248	0.157298		0.315138		0.118997		3	0.0465493	0.477318		2	0.217068	0.869429
Q925H1	Trps1	5.9e-21	141036	MOUSE	Zinc finger transcription factor Trps1	-0.34938	-1.52317	-0.0642004		-0.875543	-1.08049	-0.733521		3	-0.645583	0.84608		3	-0.896518	2.20814
Q61074	Ppm1g	1.2e-17	58728.6	MOUSE	Protein phosphatase 1G	0.134443	-0.406356	-0.374485		-0.388027	-0.484766	-0.470689		3	-0.215466	0.764738		3	-0.447827	2.6469
Q8VD65	Pik3r4	1.5e-17	152600	MOUSE	Phosphoinositide 3-kinase regulatory subunit 4	0.185349	0.210989	0.245165		0.532705	0.641611	0.575597		3	0.213834	2.48804		3	0.583304	2.83333
O09044	Snap23	3.8e-20	23261.1	MOUSE	Synaptosomal-associated protein 23	0.13343	-0.0219491	0.00744182		0.371091	0.45086	0.0140364		3	0.0396408	0.608171		3	0.278663	1.06127
Q7TQI3	Otub1	5e-22	31270.3	MOUSE	Ubiquitin thioesterase OTUB1	0.118245	0.0407257	0.0102162		0.207355	0.187718	0.153131		3	0.0563956	0.955581		3	0.182735	2.42946
P51174	Acadl	1.7e-17	47908.4	MOUSE	Long-chain specific acyl-CoA dehydrogenase, mitochondrial	0.182106	0.0974494	0.270569		0.536219	0.535769	0.447265		3	0.183375	1.47551		3	0.506417	2.77036
Q3U9U5	Bcap31	4.1e-16	27986.8	MOUSE	Putative uncharacterized protein	0.260917	0.153956	0.205377		0.369621	0.37355	0.232164		3	0.20675	1.96669		3	0.325112	2.0035
Q3UIP2	Pcolce	6.7e-21	50168.5	MOUSE	Procollagen C-endopeptidase enhancer protein	-0.158815	-0.155171	-0.217838		-0.948075	-0.952358	-0.821167		3	-0.177275	2.1914		3	-0.9072	2.95027
Q9Z1G3	Atp6v1c1	2.8e-19	43887.9	MOUSE	V-type proton ATPase subunit C 1	-0.0150506	-0.107349	-0.00649886		0.110604	-0.13414	0.176876		3	-0.0429662	0.803138		3	0.0511135	0.49279
Q922X9	Prmt7	4.6e-23	78301.9	MOUSE	Protein arginine N-methyltransferase 7	-0.110265	-0.259336	-0.268338		-0.583544	-0.332359	-0.443344		3	-0.212646	1.57282		3	-0.453082	1.907
P35700	Prdx1	2.8e-13	22176.7	MOUSE	Peroxiredoxin-1	0.0410094	0.101157	0.00613458		0.286731	0.327645	0.193665		3	0.0494337	0.964926		3	0.269347	1.97919
O08807	Prdx4	3.3e-22	31052.8	MOUSE	Peroxiredoxin-4	0.124098	0.117488	0.0800653		0.30231	0.330603	0.241953		3	0.107217	2.09801		3	0.291622	2.40116
Q3UK27	Nae1	2.6e-20	60274	MOUSE	Putative uncharacterized protein	0.106369	0.054167	0.0246275		0.13252	0.230542	0.142784		3	0.0617212	1.21155		3	0.168615	1.79068
Q9CYA0	Creld2	5.5e-30	38220	MOUSE	Cysteine-rich with EGF-like domain protein 2	0.0704648	0.750791	-0.0525277		0.0294674	0.0552571	0.0975925		3	0.256243	0.685221		3	0.0607723	1.3361
O88543	Cops3	2.1e-22	47832.5	MOUSE	COP9 signalosome complex subunit 3	0.132956	-0.0345227	-0.0168686		-0.152911	0.0629655	-0.0494929		3	0.0271883	0.48166		3	-0.0464794	0.5738
Q6ZPF4	Fmnl3	1.3e-15	117170	MOUSE	Formin-like protein 3	0.151186	0.357501	0.164561		0.0589756	0.38002	0.00552489		3	0.224416	1.40876		3	0.148173	0.778959
Q99K30	Eps8l2	1.1e-15	82230.1	MOUSE	Epidermal growth factor receptor kinase substrate 8-like protein 2	-0.0416274	0.121949	-0.122516		0.223248	-0.054289	0.286379		3	-0.014065	0.365025		3	0.151779	0.847751
Q03963	Eif2ak2	7.7e-19	58280.4	MOUSE	Interferon-induced, double-stranded RNA-activated protein kinase	0.367218	0.273805	0.145909		0.604261	0.17154	0.372664		3	0.262311	1.56131		3	0.382822	1.33656
Q3UKP6	Baiap2	1.2e-16	57596.4	MOUSE	Putative uncharacterized protein	-0.00634828	0.492002	-0.184196		-0.166163	-0.100476	-0.030644		3	0.100486	0.47578		3	-0.0990942	1.19757
Q6NXI6	Rprd2	1.8e-17	156587	MOUSE	Regulation of nuclear pre-mRNA domain-containing protein 2	-0.135951	-0.139426	-0.0811548		-0.202072	-0.179129	0.0765285		3	-0.118844	1.91544		3	-0.101558	0.728995
Q93092	Taldo1	4.3e-16	37387.3	MOUSE	Transaldolase	0.0857414	0.030052	0.0386769		0.123424	0.238741	0.205142		3	0.0514901	1.31501		3	0.189102	1.80606
Q3TCE7	Arpc1b	6.9e-25	41092.3	MOUSE	Putative uncharacterized protein	0.0206692	-0.0446653	-0.0759258		0.0807309	0.0637948	-0.0602049		3	-0.0333073	0.741826		3	0.028107	0.528976
O89032	Sh3pxd2a	4.9e-23	124202	MOUSE	SH3 and PX domain-containing protein 2A	-0.572963	-0.0255868	0.0380581		-0.121256	-0.238442	0.0658494		3	-0.186831	0.660532		3	-0.0979497	0.716506
A2AAY5	Sh3pxd2b	1.9e-16	101518	MOUSE	SH3 and PX domain-containing protein 2B	0.188039	0.548055	0.0777684		-0.0999214	-0.181363	-0.053054		3	0.271288	1.00823		3	-0.111446	1.31444
Q80XK6	Atg2b	1.8e-15	231401	MOUSE	Autophagy-related protein 2 homolog B	-0.188984	-0.177129	0.036654		-0.0656187	0.0589296	0.142727		3	-0.10982	0.865062		3	0.045346	0.575222
P98078	Dab2	3.9e-17	82312.5	MOUSE	Disabled homolog 2	-0.170115	-0.228122	-0.238867		-0.580399	-0.583795	-0.519709		3	-0.212368	2.30282		3	-0.561301	3.16339
Q8BJZ4	Mrps35	5e-23	35975.6	MOUSE	28S ribosomal protein S35, mitochondrial	-0.155976	-0.259263	-0.108431		-0.501663	-0.374032	-0.240135		3	-0.174557	1.52781		3	-0.371943	1.71193
Q3U8P8	Jak1	7.1e-15	129980	MOUSE	Tyrosine-protein kinase	-0.333293	-0.34638	-0.272056		-0.762463	-0.721782	-0.738181		3	-0.317243	2.58726		3	-0.740809	3.89559
E9Q9V7	Srcap	3.9e-17	106321	MOUSE	Protein Srcap	-0.263262	0.0942348	-0.0694363		-0.399233	-0.538461			3	-0.0794879	0.583243		2	-0.468847	1.32865
Q80U12	Sgsm2	1.8e-08	113078	MOUSE	Small G protein signaling modulator 2			-4.11183						1	-4.11183	#DIV/0!		0	#DIV/0!	#DIV/0!
Q9Z1P7	Kank3	1.8e-08	84187	MOUSE	KN motif and ankyrin repeat domain-containing protein 3					-0.289378				0	#DIV/0!	#DIV/0!		1	-0.289378	#DIV/0!
P83887	Tubg1	1.8e-20	51101.3	MOUSE	Tubulin gamma-1 chain	0.108757	0.115765	0.122043		0.152908	0.275338	0.137146		3	0.115522	3.25898		3	0.188464	1.6044
Q9JIH2	Nup50	8e-23	49485.6	MOUSE	Nuclear pore complex protein Nup50	-0.24802	0.703516	-0.656585		-0.460182	-0.504158	-0.488836		3	-0.0670294	0.354985		3	-0.484392	3.45153
Q9R0X4	Acot9	1.3e-14	50560.9	MOUSE	Acyl-coenzyme A thioesterase 9, mitochondrial	-0.111841	-0.118044	0.0543814		0.0407252	-0.0241323	0.387387		3	-0.0585013	0.689254		3	0.13466	0.696409
Q8C5Q4	Grsf1	4.2e-19	53076.8	MOUSE	G-rich sequence factor 1	-0.117036	-0.348144	-0.214537		-0.658984	-1.14793	-0.579141		3	-0.226572	1.41231		3	-0.795353	1.63348
P53810	Pitpna	8e-20	31893.7	MOUSE	Phosphatidylinositol transfer protein alpha isoform	0.0274388	-0.242603	0.184791		0.232589	0.270976	0.225755		3	-0.0101242	0.326642		3	0.243107	2.77799
P53811	Pitpnb	3.9e-16	31487.3	MOUSE	Phosphatidylinositol transfer protein beta isoform	0.0325692	-0.148294	-0.00413756		-0.21902	0.0188214	-0.0155385		3	-0.0399541	0.565132		3	-0.0719123	0.662738
Q03141	Mark3	3.5e-19	84390.3	MOUSE	MAP/microtubule affinity-regulating kinase 3	0.433829	-0.582927	-0.0983414		-0.252691	-0.161912	0.0143175		3	-0.0824797	0.39514		3	-0.133429	0.937763
Q05512	Mark2	6.2e-16	86306.7	MOUSE	Serine/threonine-protein kinase MARK2	-0.150043	0.19785	-0.133134		0.420117	0.0485489	0.168773		3	-0.0284425	0.384498		3	0.21248	1.01826
Q8CIP4	Mark4	6.2e-16	82644.5	MOUSE	MAP/microtubule affinity-regulating kinase 4						-2.18623			0	#DIV/0!	#DIV/0!		1	-2.18623	#DIV/0!
A2AJI0	Map7d1	1.5e-15	93276.4	MOUSE	MAP7 domain-containing protein 1	0.00443365	0.0753253	-0.155918		-0.0335263	0.143119	0.233721		3	-0.0253865	0.428202		3	0.114438	0.850617
Q54AJ5	Alcam	1.5e-15	65092.7	MOUSE	MuSC (Precursor)	-0.170236	-0.216471	-0.13661		0.00801215	0.0112919	-0.164896		3	-0.174439	2.06653		3	-0.0485306	0.609041
Q6ZQ03	Fnbp4	1.6e-20	111246	MOUSE	Formin-binding protein 4	-0.280028	-0.183191	-0.386041		-0.256927	-0.335243	-0.339812		3	-0.283087	1.69626		3	-0.310661	2.43097
P55200	Mll	1.1e-16	429653	MOUSE	Histone-lysine N-methyltransferase MLL	-0.309487	-0.914713	-0.279871		-0.22004	-0.0944541	-0.14111		3	-0.501357	1.1666		3	-0.151868	1.57186
O09131	Gsto1	1.3e-19	27497.9	MOUSE	Glutathione S-transferase omega-1	-0.067188	-0.0129087	0.0863552		0.124796	0.0653528	0.154273		3	0.00208618	0.315512		3	0.114807	1.6183
E9Q6C7	Lphn2	1.4e-16	166579	MOUSE	Latrophilin-2	-0.0490065	0.315607	0.0581723		0.197109	-0.177042	-0.101771		3	0.108258	0.675286		3	-0.0272347	0.37997
Q8BRF7	Scfd1	1.7e-21	72323.5	MOUSE	Sec1 family domain-containing protein 1	0.113707	0.184314	0.0182464		0.304569	0.342224	0.179156		3	0.105422	1.09737		3	0.275316	1.8154
O09012	Pex5	6e-24	70756.1	MOUSE	Peroxisomal targeting signal 1 receptor	-0.0297207	0.269215	0.18808		0.206377	0.337791	0.344935		3	0.142525	0.900719		3	0.296367	1.95218
A2BE28	Las1l	3.6e-22	89415.1	MOUSE	Ribosomal biogenesis protein LAS1L	0.108916	-0.14493	-0.0527428		-0.278179	-0.1716	-0.174297		3	-0.0295856	0.438542		3	-0.208025	1.86507
Q9D4J7	Phf6	1e-19	41139.7	MOUSE	PHD finger protein 6	-0.225557	-0.0864979	-0.113623		-0.609225	-0.637803	-0.451337		3	-0.141892	1.40124		3	-0.566122	2.28703
P99027	Rplp2	1.8e-22	11651	MOUSE	60S acidic ribosomal protein P2	-0.167215	-0.158978	-0.147282		-0.275461	-0.262606	-0.167539		3	-0.157825	3.17399		3	-0.235202	1.99346
Q91VN6	Ddx41	4.6e-16	69820.2	MOUSE	Probable ATP-dependent RNA helicase DDX41	0.029878	-0.119567	-0.0759278		-0.0617291	0.0755301	0.0359186		3	-0.0552057	0.770263		3	0.0165732	0.441382
Q3V222	Sec24c	1.8e-17	89317.5	MOUSE	Putative uncharacterized protein (Fragment)	0.0351995	-0.0198046	0.137652		-0.0071143	0.141464	-0.00800271		3	0.0510156	0.716647		3	0.0421156	0.614557
Q05816	Fabp5	4e-22	15137.6	MOUSE	Fatty acid-binding protein, epidermal	-0.0553673	-0.0773435	0.06371		-0.286462	-0.251169			3	-0.0230003	0.486767		2	-0.268816	1.68057
O88622	Parg	3.1e-25	109324	MOUSE	Poly(ADP-ribose) glycohydrolase	0.116008	0.284823	0.0664512		-0.417985	0.102276	-0.584914		3	0.155761	1.14704		3	-0.300208	0.847818
Q9DBC3	Ftsjd2	3.7e-18	95677.2	MOUSE	Cap-specific mRNA (nucleoside-2'-O-)-methyltransferase 1	-0.19958	-0.0234442	0.361234		-0.102238	0.235692	-0.0207331		3	0.04607	0.394177		3	0.0375736	0.427415
E0CXC2	Rnf8	3.7e-18	81371.6	MOUSE	E3 ubiquitin-protein ligase RNF8	-0.0116883		0.0702112						2	0.0292614	0.519262		0	#DIV/0!	#DIV/0!
Q80U35	Arhgef17	2.1e-14	221673	MOUSE	Rho guanine nucleotide exchange factor 17	0.00800586	0.0172711	0.0703654		0.196955	-0.00682626	0.249523		3	0.0318808	0.916348		3	0.146551	0.996353
B9EJ80	Pdzd8	7.3e-19	127740	MOUSE	PDZ domain containing 8	-0.0550887	0.444285	0.0470849		0.129305	0.0964157	-0.0572634		3	0.145427	0.657138		3	0.0561526	0.66579
A2A791	Zmym4	1.8e-20	172439	MOUSE	Zinc finger MYM-type protein 4	0.084742	0.0180249	-0.119986		-0.371043	-0.828151	-0.709151		3	-0.00573972	0.331229		3	-0.636115	1.66416
Q3TIC8	Uqcrc1	7.3e-18	52753.1	MOUSE	Putative uncharacterized protein	-0.0217571	-0.176231	-0.0403462		0.108097	0.100759	0.142765		3	-0.0794449	0.91304		3	0.117207	2.22204
Q3TET5	Pmpcb	2.3e-16	53741.9	MOUSE	Putative uncharacterized protein (Fragment)	0.144378	0.0756294	0.0470448		0.25548	0.0762133	-1.62035		3	0.0890175	1.3414		3	-0.429552	0.5631
Q3TVI8	Pbxip1	4.3e-21	81165.1	MOUSE	Pre-B-cell leukemia transcription factor-interacting protein 1	0.880918	0.478976	0.495471		1.13605	0.937836	0.937525		3	0.618455	1.67522		3	1.0038	2.66642
Q8VCW8	Acsf2	1.1e-17	67951.2	MOUSE	Acyl-CoA synthetase family member 2, mitochondrial	0.646375	0.433106	0.378516		0.999848	0.905264	0.727798		3	0.485999	1.86758		3	0.877636	2.38965
Q3TFK5	Gpatch4	3.6e-20	46554.4	MOUSE	G patch domain-containing protein 4	-0.310816	0.282999	-0.29903		-0.358522	-0.51269	-0.501829		3	-0.108949	0.498808		3	-0.45768	2.23741
Q5SUR3	Skp1a	5.6e-23	18672.2	MOUSE	MCG3634, isoform CRA_b	0.0575997	-0.0513331	0.0397956		0.0579177	0.0416715	0.103837		3	0.0153541	0.459881		3	0.0678087	1.46989
Q8BMI0	Fbxo38	9e-24	133929	MOUSE	F-box only protein 38	0.268739	0.158465	0.0626495		0.0332767	-0.516966	-1.34699		3	0.163285	1.25484		3	-0.610228	0.873504
Q3U8D2	St13	1.8e-18	41557.2	MOUSE	Putative uncharacterized protein	-0.104087	-0.130027	0.00292705		0.114502	-0.0182618	0.0612559		3	-0.0770625	1.00275		3	0.0524986	0.81447
P97447	Fhl1	1.3e-23	31889.1	MOUSE	Four and a half LIM domains protein 1	0.185489	0.186509	0.109383		0.424307	0.279462	0.157915		3	0.160461	1.91344		3	0.287228	1.4885
Q6NWW9	Fndc3b	1.6e-22	132766	MOUSE	Fibronectin type III domain-containing protein 3B	0.102365	0.119702	0.0793239		-0.132483	-0.131091	0.0101394		3	0.100463	2.17778		3	-0.084478	0.966408
Q91VM9	Ppa2	6.3e-21	38114.9	MOUSE	Inorganic pyrophosphatase 2, mitochondrial	0.0812011	-0.478453	-0.0835123		0.16406	0.329577	0.285464		3	-0.160255	0.66122		3	0.259701	1.7639
Q3TEU8	Coro1c	5.2e-18	53108.3	MOUSE	Coronin	0.119894	0.110181	0.157262		0.268945	0.171255	0.228379		3	0.129112	2.21714		3	0.22286	2.10281
P18242	Ctsd	3.3e-19	44954.2	MOUSE	Cathepsin D	-0.300984	-0.137522	0.0657247		0.210533	0.0196068	-0.116035		3	-0.12426	0.742246		3	0.038035	0.439579
Q8R1N0	Znf830	6.2e-25	40658.4	MOUSE	Zinc finger protein 830	0.136101	0.399551	-0.20112		-0.122056	0.0455352	-0.388111		3	0.111511	0.532454		3	-0.154877	0.763531
Q9CXG3	Ppil4	3.9e-29	57230.7	MOUSE	Peptidyl-prolyl cis-trans isomerase-like 4	-0.120795	0.549662	-0.0545228		-0.0291633	0.0417793	-0.0654318		3	0.124781	0.510215		3	-0.0176052	0.500106
Q9Z1T6	Pikfyve	1.7e-20	236879	MOUSE	1-phosphatidylinositol 3-phosphate 5-kinase	-0.0373933	-0.0292626	-0.0551367		0.224747	0.262285	0.557965		3	-0.0405975	1.7743		3	0.348332	1.39467
P99026	Psmb4	1.3e-22	29116.4	MOUSE	Proteasome subunit beta type-4	-0.190647	-0.0782409	-0.0505888		0.0159961	-0.341494	-0.606157		3	-0.106492	1.18457		3	-0.310552	0.944859
Q9EP53	Tsc1	4.9e-22	128747	MOUSE	Hamartin	0.143412	0.126962	0.33678		0.350942	0.583673	0.397336		3	0.202384	1.32225		3	0.443983	1.90815
Q4VAE6	Rhoa	4.3e-24	21782.4	MOUSE	Ras family member A	-0.0187479	0.00767756	0.145378		0.0545505	0.0964249	0.0406945		3	0.0447691	0.627347		3	0.06389	1.50595
Q62159	Rhoc	4.3e-24	22006.6	MOUSE	Rho-related GTP-binding protein RhoC			0.131985		0.228265				1	0.131985	#DIV/0!		1	0.228265	#DIV/0!
P62746	Rhob	4.3e-24	22123.6	MOUSE	Rho-related GTP-binding protein RhoB		0.0567004	0.199908		-0.436556		0.307001		2	0.128304	0.790411		2	-0.0647776	0.351552
Q3TJ64	Abi1	6.8e-18	51661.1	MOUSE	Putative uncharacterized protein	-0.0694381	0.0824807	-0.0521149		0.0651712	-0.0332548	0.213236		3	-0.0130241	0.391675		3	0.0817174	0.730296
P62484	Abi2	9.3e-20	49387.6	MOUSE	Abl interactor 2	-0.103321		0.132994		0.369711	0.701555	0.537904		2	0.0148362	0.337016		3	0.53639	1.81747
Q80VD1	Fam98b	5.6e-19	45349.5	MOUSE	Protein FAM98B	0.842373	0.792365	-0.221101		-0.11408	-0.0744879	-0.13708		3	0.471212	0.814145		3	-0.108549	1.86638
Q3TJZ6	Fam98a	2.8e-18	55055.8	MOUSE	Protein FAM98A	0.0315165	0.311935	-0.00158391		-0.130339	-0.164114	-0.214778		3	0.113956	0.732287		3	-0.169744	1.99432
Q4KML9	Ptpn21	2.1e-25	133504	MOUSE	Ptpn21 protein	-0.00541758	0.344046	-0.0998861		-0.00528803	-0.118488	-0.0473034		3	0.0795806	0.511948		3	-0.0570266	0.946018
Q62130	Ptpn14	1.5e-22	135043	MOUSE	Tyrosine-protein phosphatase non-receptor type 14	-0.507202	0.0736276	0.0284837		-0.182325	0.0828595	-0.667278		3	-0.13503	0.565136		3	-0.255581	0.739225
Q6NV52	Tacc3	2.5e-15	70469.4	MOUSE	Transforming acidic coiled-coil-containing protein 3	0.0959475	0.172665	0.0722427		0.210687	0.322027	-0.00237679		3	0.113618	1.49244		3	0.176779	0.990647
Q3U4H0	Mapre1	1e-19	30016.5	MOUSE	Microtubule-associated protein, RP/EB family, member 1	0.00859185	0.0351048	-0.143528		0.0128838	0.074393	-0.177404		3	-0.0332769	0.515288		3	-0.0300424	0.437641
Q8R001	Mapre2	1.7e-15	36946.5	MOUSE	Microtubule-associated protein RP/EB family member 2	0.0836454	0.11296	-0.215421		-1.59333	-0.0636064	-0.0903521		3	-0.00627208	0.319771		3	-0.582431	0.734735
Q2UZW7	Mapre3	5.9e-12	31966.5	MOUSE	Microtubule-associated protein	0.765068	0.289893	0.388698		-0.875431	-0.59818	-2.10403		3	0.48122	1.39897		3	-1.19255	1.21003
Q9D287	Bcas2	4e-18	26131.7	MOUSE	Pre-mRNA-splicing factor SPF27	-0.147097	-0.178517	0.0255068		-0.0313909	-0.0759369	-1.04387		3	-0.100036	0.893715		3	-0.383732	0.738438
Q059U9	Akap8	9.1e-19	76294.6	MOUSE	A kinase (PRKA) anchor protein 8	-0.0243672	-0.188077	-0.196001		-0.119728	-0.117737	-0.114193		3	-0.136148	1.16954		3	-0.117219	4.021
Q8BMZ5	Tsen34	5.5e-18	34196.7	MOUSE	tRNA-splicing endonuclease subunit Sen34	-0.34852	0.546474	-0.13596		5.68058	0.230003			3	0.0206645	0.32516		2	2.95529	0.625034
F6WIU1	Kri1	3.4e-26	82734.9	MOUSE	Protein KRI1 homolog	0.374393	-0.078379	-0.0480829		-0.0646731	-0.147772	-0.186324		3	0.0826438	0.502586		3	-0.132923	1.48279
O08579	Emd	1.2e-20	29435.8	MOUSE	Emerin	0.134446	-0.089883	0.144257		-0.0943448	0.096002	0.000807468		3	0.0629401	0.604708		3	0.000821543	0.305646
P41216	Acsl1	1.9e-14	77952.2	MOUSE	Long-chain-fatty-acid--CoA ligase 1	0.775532	-0.140085	-0.00152244		-0.00909019	0.25694	0.0395843		3	0.211308	0.5722		3	0.0958115	0.742262
Q3UC67	Acsl5	4.6e-13	76207.1	MOUSE	Acyl-CoA synthetase long-chain family member 5, isoform CRA_b	-0.224521	-0.465947	-0.240872		0.0379287	0.28984	-0.280738		3	-0.310446	1.54082		3	0.0156768	0.331147
Q99J36	Thumpd1	1e-24	38885.3	MOUSE	THUMP domain-containing protein 1	-0.101743	-0.192696	-0.142491		-0.112628	-0.15006	-0.066376		3	-0.145643	1.80823		3	-0.109688	1.64402
Q9DBC7	Prkar1a	4e-17	43185.5	MOUSE	cAMP-dependent protein kinase type I-alpha regulatory subunit	0.068294	-0.0890801	0.022365		-0.377215	-0.577573	-0.284248		3	0.00052631	0.304503		3	-0.413012	1.68597
Q922V4	Plrg1	1.2e-15	56938.1	MOUSE	Pleiotropic regulator 1	0.184735	0.0420841	0.0179721		-0.259471	-0.118158	-0.139595		3	0.0815969	0.890421		3	-0.172408	1.52788
Q04207	Rela	8.2e-19	60212.4	MOUSE	Transcription factor p65	0.0845617	0.0476337	0.107215		0.180621	0.388737	0.322821		3	0.0798035	1.65538		3	0.297393	1.69798
Q3TIV5	Zc3h15	5.4e-20	48327.6	MOUSE	Zinc finger CCCH domain-containing protein 15	-0.267456	-0.300201	-0.229937		-0.271776	-0.165768	-0.421465		3	-0.265864	2.53917		3	-0.286336	1.51554
Q91XV3	Basp1	1.6e-24	22086.8	MOUSE	Brain acid soluble protein 1	0.379349	0.469581	0.221723		0.323435	0.492126	0.299277		3	0.356885	1.71215		3	0.371612	1.89237
Q9Z2X8	Keap1	3.3e-22	69553.6	MOUSE	Kelch-like ECH-associated protein 1	0.406822	0.641888	0.160369		0.0248835		0.405485		3	0.403026	1.29572		2	0.215184	0.637347
Q6PDK2	Mll2	7.5e-19	600250	MOUSE	Histone-lysine N-methyltransferase MLL2	0.128898	0.419305	-0.152922		-0.160365	0.717962	-0.43619		3	0.13176	0.594526		3	0.0404691	0.338168
Q8K124	Plekho2	6.2e-20	53872.9	MOUSE	Pleckstrin homology domain-containing family O member 2	0.245195	0.470418	0.279551		0.305822	0.172627	0.408015		3	0.331721	1.67964		3	0.295488	1.60828
Q8BYJ6	Tbc1d4	2e-20	147452	MOUSE	TBC1 domain family member 4	-0.0378891	-0.35799	0.0916069		0.104572	0.236162	-0.0196418		3	-0.101424	0.579153		3	0.107031	0.847247
Q3U3T9	Tbc1d1	2.7e-15	132009	MOUSE	TBC1 domain family, member 1	0.47455	0.771265	-0.0607281		-0.241616	0.335812	-0.271566		3	0.395029	0.909863		3	-0.0591233	0.40172
Q80UU9	Pgrmc2	1.1e-25	23334.3	MOUSE	Membrane-associated progesterone receptor component 2	0.0563792	-0.155149	0.065235		0.195076	0.297841	-0.0227657		3	-0.0111782	0.351191		3	0.156717	0.922341
O55022	Pgrmc1	1.5e-21	21694.4	MOUSE	Membrane-associated progesterone receptor component 1	0.0453614	-0.00871116	0.103391		0.517592	0.452995	0.388263		3	0.0466805	0.844659		3	0.45295	2.47332
E9Q2E4	Gm15800	3.1e-15	484133	MOUSE	Protein Gm15800	1.78728	1.51592	0.314494		0.816123	1.18319	0.551336		3	1.2059	1.23401		3	0.850216	1.66329
Q8CD14	Ddx54	2.3e-19	100794	MOUSE	Putative uncharacterized protein	-0.399653	-0.421299	-0.440206		-1.0401	-0.919673	-0.610224		3	-0.420386	3.41131		3	-0.856664	1.96629
P56959	Fus	1.5e-23	52673.5	MOUSE	RNA-binding protein FUS	-0.101846	-0.167976	-0.0496298		-0.241197	-0.101262	-0.127514		3	-0.106484	1.34819		3	-0.156657	1.47101
Q8BQ46	Taf15	9.9e-15	58601.1	MOUSE	Protein Taf15			0.116568		0.168135		0.94951		1	0.116568	#DIV/0!		2	0.558823	0.711721
Q3UJF5	Top3b	1e-17	96950.1	MOUSE	DNA topoisomerase	-0.239803	-0.16087	-0.0781436		-0.171142	-1.14791	0.0447878		3	-0.159605	1.42079		3	-0.424755	0.736865
O70157	Top3a	2.7e-16	112360	MOUSE	DNA topoisomerase 3-alpha	0.014205	0.313238	0.00571699		0.51825	0.623323	0.387796		3	0.111053	0.713698		3	0.50979	2.06068
Q60953	Pml	9.8e-18	98243	MOUSE	Protein PML	0.335365	0.390103	-0.189511		0.701491	0.625063	0.272893		3	0.178652	0.66196		3	0.533149	1.55152
Q2M1K2	Pwp2	3.6e-23	102911	MOUSE	MCG115350	-0.179103	-0.276918	-0.177049		-0.226133	-0.396339	-0.344671		3	-0.211023	1.92945		3	-0.322381	1.92878
Q921S7	Mrpl37	1e-17	48341.2	MOUSE	39S ribosomal protein L37, mitochondrial	0.541934	-0.302799	-0.0850091		-0.357368	-0.33493	-0.235624		3	0.0513755	0.367551		3	-0.309307	2.14531
Q3U1Q4	Grb2	4.1e-20	25239.6	MOUSE	Putative uncharacterized protein	-0.0603255	-0.0693218	0.0342001		0.0425236	0.000163402	0.214682		3	-0.0318157	0.659565		3	0.0857896	0.794469
P84091	Ap2m1	5.8e-23	49655.1	MOUSE	AP-2 complex subunit mu	0.100079	-0.0524529	0.0654967		0.192348	-0.077612	0.0612348		3	0.0377076	0.602129		3	0.0586571	0.576571
Q7TNE3	Spag7	5.4e-19	25921.5	MOUSE	Sperm-associated antigen 7	0.116692	0.223126	0.114236		0.0831183	-0.0454911	0.204546		3	0.151351	1.58582		3	0.0807244	0.721522
Q9JJT9	Phax	2e-20	43247.7	MOUSE	Phosphorylated adapter RNA export protein	0.0479138	-0.0694369	-0.0824836		-0.0832683	0.0164743	-0.063215		3	-0.0346689	0.609898		3	-0.0433363	0.837467
Q8BSY0	Asph	2e-29	83042.8	MOUSE	Aspartyl/asparaginyl beta-hydroxylase	0.0231405	0.0292395	-0.12124		-0.160452	-0.0228839	-0.623409		3	-0.0229534	0.464343		3	-0.268915	0.858712
Q8BYU6	Tor1aip2	1.2e-25	54496	MOUSE	Torsin-1A-interacting protein 2	-0.0336946	-0.140776	0.0563232		0.0836264	0.532492	0.873426		3	-0.0393826	0.552193		3	0.496515	1.09125
Q921T2	Tor1aip1	6.3e-19	66781.7	MOUSE	Torsin-1A-interacting protein 1	0.0903867	0.309163	-0.148159		0.240487	0.636875	0.328809		3	0.083797	0.529715		3	0.402057	1.40408
Q3U3F6	Raly	1.3e-22	31199.1	MOUSE	HnRNP-associated with lethal yellow, isoform CRA_f	-0.344025	-0.442428	-0.159196		-0.69432	-0.694949	-0.559655		3	-0.315217	1.50242		3	-0.649641	2.62319
P11031	Sub1	2.6e-22	14427.6	MOUSE	Activated RNA polymerase II transcriptional coactivator p15	-0.0202793	-0.0561294	0.103382		0.0210692	0.128872	0.144558		3	0.00899107	0.36174		3	0.0981665	1.1966
Q3TZH6	Ezh2	5.8e-22	85333	MOUSE	Putative uncharacterized protein	-0.0469929	0.132449	0.110655		-0.165422	-0.0121283	-0.235993		3	0.0653705	0.736352		3	-0.137848	1.06481
P35831	Ptpn12	6.6e-21	86527.2	MOUSE	Tyrosine-protein phosphatase non-receptor type 12	0.0265402	0.154377	-0.0213656		-0.0686477	-0.163336	-0.377776		3	0.0531838	0.680561		3	-0.203253	1.10709
Q9DCD5	Tjap1	2.1e-17	59420	MOUSE	Tight junction-associated protein 1	-0.0763806	-0.00112286	-0.0604173		-0.433999	-0.436541	-0.0766588		3	-0.0459736	1.04		3	-0.315733	1.22762
Q8BSP2	Ncaph2	2e-21	68946.1	MOUSE	Condensin-2 complex subunit H2	0.129678	0.668613	0.120856		0.600309	0.435829	0.29979		3	0.306383	0.934015		3	0.445309	1.74447
Q3TKD1	Rfc3	2.7e-21	40526.6	MOUSE	MCG17786, isoform CRA_a	0.213296	0.0441223	0.229125		-0.0075284	0.105843	0.147335		3	0.162181	1.25402		3	0.0818831	0.960816
Q8K232	Add1	3.4e-22	80624.2	MOUSE	Adducin 1 (Alpha)	0.238094	0.124386	0.290797		-0.106635	-0.0593295	0.554493		3	0.217759	1.62644		3	0.129509	0.519339
Q3UHB2	Tsc2	4.1e-16	201373	MOUSE	Putative uncharacterized protein	0.281309	-1.09395	0.240088		0.382422	0.441256	0.321205		3	-0.190852	0.447489		3	0.381628	2.39004
Q3TWW8	Srsf6	1.4e-17	39025.6	MOUSE	Protein Srsf6	-0.056922	-0.0454342	0.0525857		0.00496619	-0.035408	0.116485		3	-0.0165902	0.468443		3	0.028681	0.528484
Q542V3	Srsf4	9.6e-16	56249.2	MOUSE	Serine/arginine-rich-splicing factor 4	0.891571	-0.699159	-0.0149396		-0.665544	-0.0763039	-0.108329		3	0.0591574	0.342192		3	-0.283392	0.859053
O35326	Srsf5	1.1e-15	30891.6	MOUSE	Serine/arginine-rich splicing factor 5	-0.202122	0.00209134	0.127075		-0.0215738	-0.0511004	0.0427091		3	-0.0243185	0.385322		3	-0.00998836	0.42431
Q8BTT6	Diexf	1.2e-15	88818.5	MOUSE	Digestive organ expansion factor homolog	-0.062775	-0.187483	-0.0702666		-0.359378	-0.3028	-0.054095		3	-0.106841	1.22891		3	-0.238758	1.20142
O08550	Wbp7	1.2e-14	294823	MOUSE	Histone-lysine N-methyltransferase MLL4	-0.0229601	0.232005	-0.017108		0.298265	-0.79444	0.0110237		3	0.0639789	0.58008		3	-0.161717	0.47499
Q3TJ07	Stau1	6.1e-16	63417.3	MOUSE	Putative uncharacterized protein (Fragment)	0.104606	0.310634	-0.0227451		-0.207655	-0.0498682	-0.288044		3	0.130832	0.809238		3	-0.181856	1.2162
Q8CJ67	Stau2	6.3e-13	62535.9	MOUSE	Double-stranded RNA-binding protein Staufen homolog 2	0.270157	-0.0399035	0.832818				-1.36029		3	0.354357	0.824323		1	-1.36029	#DIV/0!
Q7TPD0	Ints3	1.1e-19	117939	MOUSE	Integrator complex subunit 3	-0.0197039	0.0315512	0.0377933		0.127312	0.0644303	0.0152143		3	0.0165469	0.638708		3	0.0689855	1.07749
Q3TUQ7	Prkaa1	3.8e-20	62728.3	MOUSE	Prkaa1 protein	-0.176911	-0.26583	0.116729		0.0147405	-0.108995	-0.166283		3	-0.108671	0.651329		3	-0.0868458	0.910969
Q60689	Ink76	2.8e-17	7278.4	MOUSE	Ink 76 (Fragment)							0.0591002		0	#DIV/0!	#DIV/0!		1	0.0591002	#DIV/0!
Q91V12	Acot7	1.7e-15	42537.3	MOUSE	Cytosolic acyl coenzyme A thioester hydrolase	-0.0599412	-0.00593778	0.0910023		0.277271	-0.211207	-0.479801		3	0.00837445	0.362967		3	-0.137912	0.524903
Q6ZWZ6	Rps12	1.1e-20	14515.1	MOUSE	40S ribosomal protein S12	-0.208723	0.115722	-0.0101836		-0.31087	-0.276911	0.0874899		3	-0.0343947	0.425617		3	-0.166764	0.794491
Q3U5R8	Impa1	1.2e-20	30413.5	MOUSE	Putative uncharacterized protein	0.0890661	0.123153	0.0362304		0.340728	0.283549	0.329099		3	0.0828165	1.38758		3	0.317792	2.8238
Q8BW72	Kdm4a	2e-16	120335	MOUSE	Lysine-specific demethylase 4A	-0.173847	-0.135185	-0.10759		-0.351709	-0.23904	-0.490668		3	-0.138874	2.03123		3	-0.360472	1.71647
O88545	Cops6	3.4e-20	35880.4	MOUSE	COP9 signalosome complex subunit 6	-0.151753	-0.0957918	-0.0275745		0.151583	0.102359	-0.0745598		3	-0.0917063	1.20358		3	0.0597942	0.623729
G5E8T2	Ttc3	8.4e-19	223911	MOUSE	E3 ubiquitin-protein ligase TTC3	0.185729	0.153162	0.454492		0.286835	-0.0115806	0.694348		3	0.264461	1.26212		3	0.323201	0.894589
Q6VH22	Ift172	1.7e-14	197550	MOUSE	Intraflagellar transport protein 172 homolog	0.113136	-0.0222442	-0.0149305		-0.152062		-0.0233186		3	0.0253204	0.506689		2	-0.0876901	0.695586
Q4VAA9	Metap1	1.3e-20	43221.6	MOUSE	Methionine aminopeptidase	0.128562	-0.178601	0.0547639		0.0906518	0.175948	0.182685		3	0.00157511	0.306286		3	0.149762	1.7333
Q9WU62	Incenp	1.7e-32	101209	MOUSE	Inner centromere protein	0.225614	0.218088	0.2033		0.451625	0.625514	0.189388		3	0.215667	3.33612		3	0.422176	1.40044
Q3TI27	Prps1	3e-27	34865.6	MOUSE	Ribose-phosphate pyrophosphokinase	-0.0669215	0.0292788	0.182788		-0.0164348	0.634816	0.0645712		3	0.0483819	0.541905		3	0.227651	0.718667
Q9CS42	Prps2	3e-27	34786.4	MOUSE	Ribose-phosphate pyrophosphokinase 2	-0.106426	-0.52186	-0.00232168		0.120956	-0.0849783	-2.08947		3	-0.210202	0.800772		3	-0.684498	0.663535
Q62415	Ppp1r13b	3.5e-08	119171	MOUSE	Apoptosis-stimulating of p53 protein 1			-0.645529		-0.180021				1	-0.645529	#DIV/0!		1	-0.180021	#DIV/0!
Q3U057	Cpsf3	3.9e-18	77533.7	MOUSE	Putative uncharacterized protein	0.863777	-0.107848	0.0193367		-0.0553633	-0.0870724	0.00949781		3	0.258422	0.614456		3	-0.0443126	0.887245
Q8BH59	Slc25a12	3.8e-19	74570.2	MOUSE	Calcium-binding mitochondrial carrier protein Aralar1	0.0478535	-0.0695191	-0.025826		0.46072	0.592778	0.226108		3	-0.0158305	0.462599		3	0.426536	1.53935
Q8C140	Slc25a13	6.8e-16	74339.4	MOUSE	Putative uncharacterized protein	0.148191	-0.19606	0.185399		0.152859	-0.59303	0.31615		3	0.0458434	0.430582		3	-0.0413403	0.34867
P05132	Prkaca	1.5e-23	40571	MOUSE	cAMP-dependent protein kinase catalytic subunit alpha	-0.017727	-0.195154	-0.151669		-0.0779591	-0.365792	-0.113797		3	-0.121517	1.12315		3	-0.18585	1.05406
P68181	Prkacb	3.1e-15	40708.2	MOUSE	cAMP-dependent protein kinase catalytic subunit beta	0.0994371	0.117582	0.253838		-0.0412135	-0.0374639	-0.218905		3	0.156952	1.37489		3	-0.0991942	0.921949
P49586	Pcyt1a	2.8e-19	41667.2	MOUSE	Choline-phosphate cytidylyltransferase A	0.160171	0.0425758	0.137214		0.254405	0.293502	0.227971		3	0.11332	1.35764		3	0.258626	2.57081
Q8BZW8	Nhlrc2	7.4e-20	78430.8	MOUSE	NHL repeat-containing protein 2	-0.272588	-0.365625	-0.0767389		-0.183542	-0.170621	-0.147895		3	-0.238317	1.26986		3	-0.167353	2.71515
Q3TY95	Akt2	8e-19	55742.2	MOUSE	MCG22777, isoform CRA_a	0.00836245	1.08519	0.188995		0.338369	0.171223	-0.0559521		3	0.427516	0.785436		3	0.151213	0.80031
P31750	Akt1	8e-19	55707.8	MOUSE	RAC-alpha serine/threonine-protein kinase	-0.176885	0.228899	-0.0730824		-0.152788	-0.143939	0.0114096		3	-0.00702289	0.319106		3	-0.0951057	0.965763
Q6NXW0	Akt3	8e-19	55657.9	MOUSE	Thymoma viral proto-oncogene 3		0.0677678	0.148992		-0.347928	-1.17106	-0.0294641		2	0.10838	0.942632		3	-0.516152	0.872218
Q3UXD8	Rps6kb1	2e-10	59145.2	MOUSE	Putative uncharacterized protein		-0.0471269	0.00529357		0.259454		-0.00501811		2	-0.0209166	0.544234		2	0.127218	0.591496
Q9Z1M4	Rps6kb2	2.3e-09	53538.7	MOUSE	Ribosomal protein S6 kinase beta-2			3.44866		0.136695	-0.0132754	0.538608		1	3.44866	#DIV/0!		3	0.220676	0.806381
Q80U95	Ube3c	5.6e-18	123977	MOUSE	Ubiquitin-protein ligase E3C	-0.0222101	-0.105101	-0.0474794		-0.0614514	0.0728311	0.205505		3	-0.0582634	1.15256		3	0.072295	0.650512
P26645	Marcks	4.1e-23	29661.5	MOUSE	Myristoylated alanine-rich C-kinase substrate	0.0647267	-0.318095	0.0329554		-0.742978	-0.374573	-0.577208		3	-0.0734709	0.515712		3	-0.56492	1.77253
E9QJV4	Prpf39	9.4e-14	77925	MOUSE	Pre-mRNA-processing factor 39	-0.201083	-0.123859	-0.210004		-0.169716	-0.0967898	0.0738469		3	-0.178315	1.94451		3	-0.0642195	0.631294
Q0VGT3	Pogz	8.6e-20	154060	MOUSE	Pogo transposable element with ZNF domain	-0.00467261	0.182256	-0.0522537		-0.0777683	0.0686009	-0.173172		3	0.0417766	0.50971		3	-0.0607799	0.621193
P14152	Mdh1	3.7e-18	36511.5	MOUSE	Malate dehydrogenase, cytoplasmic	0.127618	0.15334	0.135777		0.352651	0.409377	0.299833		3	0.138912	2.82806		3	0.353954	2.40391
Q8CH02	Sugp1	1.3e-15	72649.8	MOUSE	SURP and G-patch domain-containing protein 1	-0.0778891	-0.128853	-0.409838		-0.307033	-0.588575	-0.776623		3	-0.205527	1.0346		3	-0.55741	1.56047
P28271	Aco1	7.9e-24	98126.4	MOUSE	Cytoplasmic aconitate hydratase	0.221757	0.117369	0.161178		0.0863112	0.120608	0.174814		3	0.166768	1.80425		3	0.127244	1.71406
Q811J3	Ireb2	4.9e-13	104921	MOUSE	Iron-responsive element-binding protein 2	0.243098	-0.0337559	0.21044		-0.211787	-0.561066	-0.187494		3	0.139927	0.902491		3	-0.320115	1.23071
Q3UM45	Ppp1r7	4.6e-17	41292.3	MOUSE	Protein phosphatase 1 regulatory subunit 7	0.0569409	0.141084	0.151744		0.386166	0.154742	0.200037		3	0.11659	1.52128		3	0.246982	1.43606
Q9D0G0	Mrps30	1.3e-20	49939.7	MOUSE	28S ribosomal protein S30, mitochondrial	-0.290759	-0.328399	-0.0882245		-0.48883	-0.187198	-0.401379		3	-0.235794	1.3607		3	-0.359136	1.54535
F8WGW3	Srbd1	1.4e-17	110195	MOUSE	S1 RNA-binding domain-containing protein 1	0.0159094	0.0224363	0.0156802		-0.0970035	-0.261555	-0.344121		3	0.0180086	2.13103		3	-0.234226	1.37574
Q7TME2	Spag5	3.1e-15	129994	MOUSE	Sperm-associated antigen 5	0.254129	0.359128	0.20095		0.542013	1.02657	0.42546		3	0.271402	1.85249		3	0.664682	1.46314
P17751	Tpi1	3e-17	32192.1	MOUSE	Triosephosphate isomerase	0.09223	0.172318	0.0963379		0.425393	0.282487	0.312302		3	0.120295	1.65958		3	0.340061	2.09717
Q4VAA2	Cdv3	2.8e-16	29729.2	MOUSE	Protein CDV3	-0.119219	0.282288	-0.267397		-0.383219	-0.360099	-0.518074		3	-0.0347765	0.370645		3	-0.420464	2.17235
Q544H0	Eif3g	5.8e-24	35638.3	MOUSE	Eukaryotic translation initiation factor 3 subunit G	-0.0704883	-0.144491	-0.0844825		-0.0533074	-0.0241006	-0.0411466		3	-0.0998207	1.61969		3	-0.0395182	1.66754
Q9CS00	Cactin	4.3e-18	90662.1	MOUSE	Cactin	-0.0408424	-0.0286148	-0.16415		0.827996	-0.231385	0.246845		3	-0.0778692	0.970954		3	0.281152	0.642477
P15864	Hist1h1c	3.4e-19	21266.8	MOUSE	Histone H1.2	-0.451279	-0.92898	-0.379754		-1.0614	-1.07832	-1.14519		3	-0.586671	1.417		3	-1.09497	3.56433
P43274	Hist1h1e	3.4e-19	21977.5	MOUSE	Histone H1.4	-0.352729	-0.529427	-0.15289		-0.729387	-0.681299	-1.22326		3	-0.345015	1.36322		3	-0.877982	1.73541
P43277	Hist1h1d	3.4e-19	22099.7	MOUSE	Histone H1.3	-0.494864	-0.880287	-0.353123		-1.24434	-0.938258	-0.60291		3	-0.576091	1.47307		3	-0.928503	1.7262
P43276	Hist1h1b	2.6e-17	22576.3	MOUSE	Histone H1.5	-0.388976	-0.770281	-0.269128		-0.929449	-0.921408	-0.793057		3	-0.476129	1.35822		3	-0.881305	2.90237
P43275	Hist1h1a	8.6e-25	21785.3	MOUSE	Histone H1.1	-0.925048	-1.15989	-0.41732		-1.92862	-1.78674	-1.51581		3	-0.834087	1.50438		3	-1.74373	2.62087
Q3U430	Anapc2	1.4e-19	95023.5	MOUSE	Anaphase promoting complex subunit 2	0.182507	-0.222202	0.208306		0.0250744	0.18493	0.15547		3	0.0562038	0.440193		3	0.121825	1.1828
Q7TMX6	Exosc7	2.7e-21	31826.8	MOUSE	Exosome component 7	0.0429278	-0.105088	-0.0739821		-0.131777	-0.13345	0.107101		3	-0.0453807	0.677881		3	-0.0527086	0.539634
Q9D7M8	Polr2d	4.2e-20	16311.4	MOUSE	DNA-directed RNA polymerase II subunit RPB4	0.0187164	-0.0368423	-0.119258		-0.104014	-0.0108267	-0.0799049		3	-0.0457947	0.731004		3	-0.0649152	1.13764
Q7TSY8	Sgol2	5.3e-18	130278	MOUSE	Shugoshin-like 2	0.383235	-0.284919	1.04673		0.304898	0.165825	-0.406054		3	0.381683	0.672237		3	0.0215561	0.332498
Q9JLV6	Pnkp	6.2e-19	57223.9	MOUSE	Bifunctional polynucleotide phosphatase/kinase	-0.0209376	-0.151681	0.0951019		0.101986	0.103183	0.252011		3	-0.0258388	0.42498		3	0.152393	1.33591
Q3UQ28	Pxdn	1.8e-23	165104	MOUSE	Peroxidasin homolog	-0.0646103	-0.158567	0.0380227		0.411165	0.0253365	0.120661		3	-0.0617181	0.709379		3	0.185721	0.902034
Q6ZQ74	Daam1	4.6e-19	124522	MOUSE	MKIAA0666 protein (Fragment)	0.139028	-0.0216096	0.104871		-0.269976	-0.121093	-0.509794		3	0.0740963	0.871848		3	-0.300288	1.23057
Q8CG73	Rpgrip1l	6.1e-18	145002	MOUSE	Protein fantom	0.426623	0.22158	-0.59435		-0.279658	-2.27914	0.0736415		3	0.017951	0.319064		3	-0.828387	0.726456
Q9D312	Krt20	3.6e-08	49034.5	MOUSE	Keratin, type I cytoskeletal 20		0.0468119			2.31204				1	0.0468119	#DIV/0!		1	2.31204	#DIV/0!
[truncated: 6,517 more rows]
