# Supplementary material for: Nucleolin perturbation alters membrane lipid homeostasis
Source: Royal Society of Chemistry journal article supplement (doi:10.1039/d5mo00088b), 2025-10-28
Supplement: d5mo00088b3.pdf [file d5mo00088b3.pdf]

## Supplementary Figures

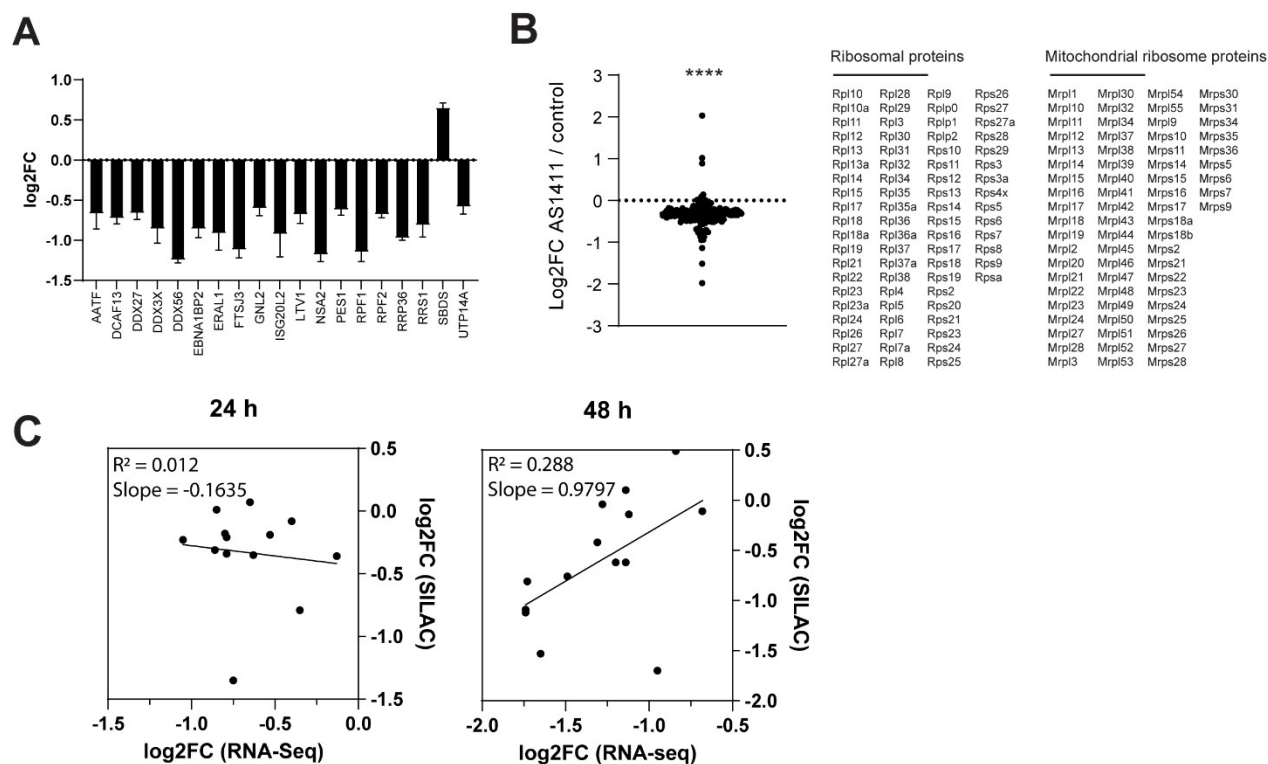

**Supplementary Figure 1. SILAC supporting data (related to Figure 2).** (A) AS1411-induced changes in proteins of the “Ribosome biogenesis” GO term in Fig2.C (right panel); mean log<sub>2</sub> fold changes (AS1411/control) ± SEM are shown (n = 2-3). (B) AS1411/control log<sub>2</sub> fold changes of all cytosolic and mitochondrial ribosomal proteins identified in the SILAC proteomics experiment (indicated on the right). The group median -0.3149 is significantly different from the reference median of 0 indicating downregulation (\*\*\* p < 0.0001, one sample Wilcoxon test). (C) Correlation plots of log<sub>2</sub>FC values in RNA-seq and SILAC analyses of cholesterol pathway members (shown in Fig. 2F).

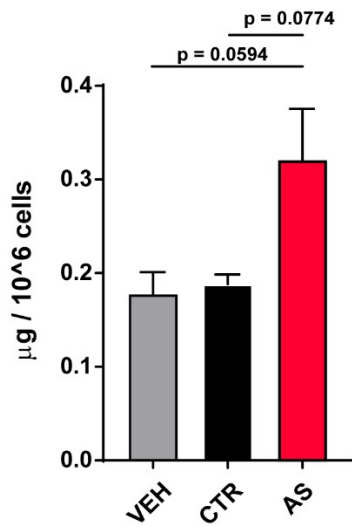

**Supplementary Figure 2 (related to Figure 4). 48h treatment of NIH-3T3 cells increases protein content per cell.** After AS1411 treatment, cells were trypsinized, counted using a hemocytometer, lysed in RIPA buffer and protein content was measured by BCA assay. Shown is protein content per one million cells (means  $\pm$  SEM from three independent biological repeats; statistics: one-way ANOVA with Tukey's post-hoc test).

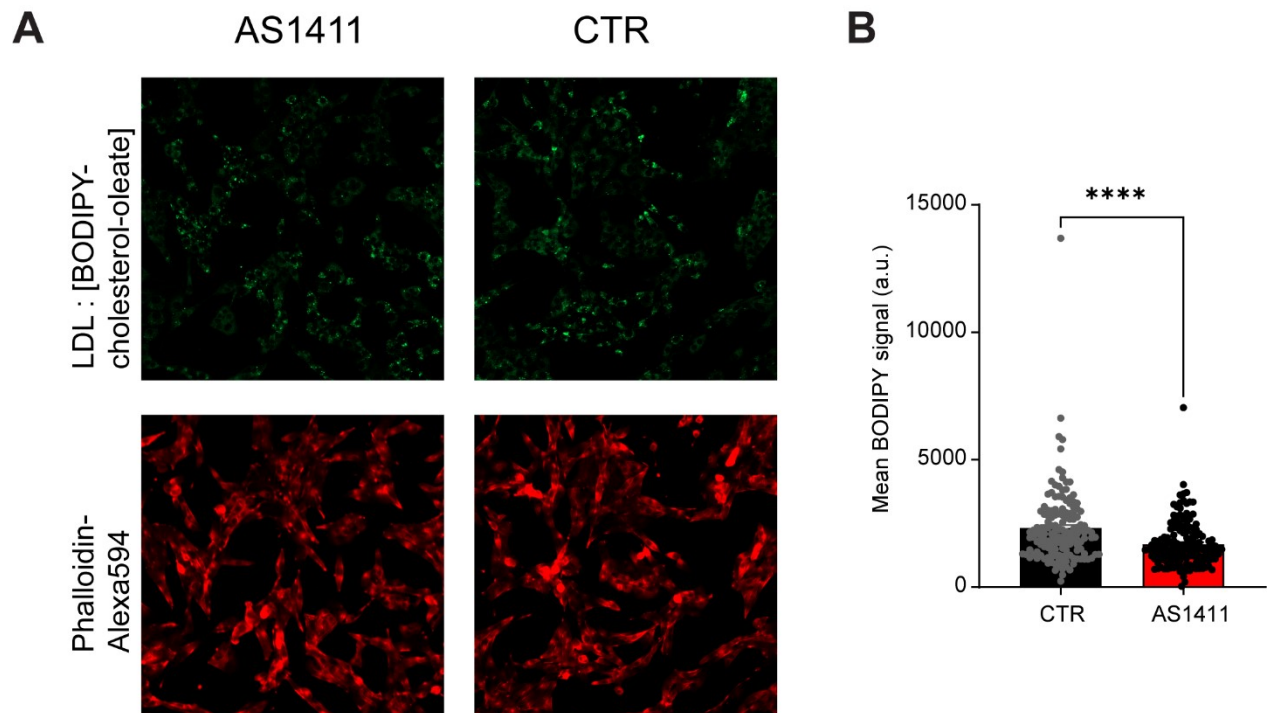

**Supplementary Figure 3 (related to Figure 5).** (A) Uptake of LDL:BODIPY-cholesterol oleate into NIH-3T3 cells, measured 24h after incubating cells with 50  $\mu\text{g}/\text{mL}$  of LDL complexed with BODIPY-cholesterol oleate and AS1411 or control aptamer (both 10  $\mu\text{M}$ ) in serum-free DMEM. BODIPY fluorescence was quantified in fixed and phalloidin-counterstained cells by confocal microscopy. (B) Quantification of cholesterol uptake per cell 150 cells per condition, pooled from from two independent experiments. Mean integrated density (total fluorescence per cell) values  $\pm$  SEM are shown.
