# Supplementary material for: Nucleolin perturbation alters membrane lipid homeostasis
Source: Royal Society of Chemistry journal article supplement (doi:10.1039/d5mo00088b), 2025-10-28
Supplement: d5mo00088b4.xlsx [file d5mo00088b4.xlsx]

## Sheet: RNA-seq 24h
Table S1
Gene	Gene_name	log2FoldChange	padj
ENSMUSG00000035270	Impg2	5.834	0.141
ENSMUSG00000036908	Unc93b1	5.808	0.152
ENSMUSG00000026650	Meig1	5.458	0.3
ENSMUSG00000064267	Hvcn1	5.402	0.185
ENSMUSG00000039110	Mycbpap	5.378	0.225
ENSMUSG00000074899	Sptbn5	5.376	0.198
ENSMUSG00000079654	Prrt4	5.341	0.192
ENSMUSG00000031451	Gas6	5.281	0.233
ENSMUSG00000026170	Cyp27a1	5.051	0.249
ENSMUSG00000023000	Dhh	4.743	0.295
ENSMUSG00000038811	Gngt2	4.691	0.28
ENSMUSG00000056498	Tmem154	4.671	0.286
ENSMUSG00000053208	Kat2b-ps	4.668	0.313
ENSMUSG00000086093	Gm15341	4.666	0.298
ENSMUSG00000000202	Btbd17	4.121	0.389
ENSMUSG00000037188	Grhl3	4.098	0.372
ENSMUSG00000020932	Gfap	4.075	0.397
ENSMUSG00000024810	Il33	4.074	0.388
ENSMUSG00000082023	Gm14407	4.026	0.438
ENSMUSG00000068551	Zfp467	3.975	0.431
ENSMUSG00000036062	Phf24	3.964	0.443
ENSMUSG00000064158	Izumo1	3.955	0.455
ENSMUSG00000020017	Hal	3.447	0.132
ENSMUSG00000074715	Ccl28	3.36	0.161
ENSMUSG00000041117	Ccdc8	3.327	0.161
ENSMUSG00000107971	RP23-259J8.5	3.326	0.179
ENSMUSG00000050270	Tmem220	3.315	0.171
ENSMUSG00000044708	Kcnj10	3.153	0.589
ENSMUSG00000068263	Efcc1	3.147	0.586
ENSMUSG00000102300	Gm34106	3.128	0.244
ENSMUSG00000069227	Gprin1	3.125	0.574
ENSMUSG00000044349	Snhg11	3.09	0.629
ENSMUSG00000101641	Gm29560	3.087	0.606
ENSMUSG00000105731	RP24-409D4.3	3.087	0.608
ENSMUSG00000003283	Hck	3.084	0.593
ENSMUSG00000011118	Panx3	3.083	0.59
ENSMUSG00000037754	Ppp1r16b	3.077	0.572
ENSMUSG00000038578	Susd1	3.07	0.0602
ENSMUSG00000078922	Tgtp1	3.031	0.0703
ENSMUSG00000034829	Nxnl1	2.976	0.253
ENSMUSG00000020638	Cmpk2	2.918	0.236
ENSMUSG00000063535	Zfp773	2.889	0.286
ENSMUSG00000085211	B430219N15Rik	2.872	0.287
ENSMUSG00000079330	Lemd1	2.82	0.337
ENSMUSG00000048349	Pou4f1	2.784	0.109
ENSMUSG00000079489	C030013D06Rik	2.778	0.318
ENSMUSG00000040111	Gramd1b	2.748	0.29
ENSMUSG00000029862	Clcn1	2.716	0.176
ENSMUSG00000091744	Gm17732	2.693	0.323
ENSMUSG00000085843	Kank4os	2.678	0.319
ENSMUSG00000006310	Zbtb32	2.667	0.306
ENSMUSG00000085564	Gm12198	2.617	0.0953
ENSMUSG00000044694	2010007H06Rik	2.596	0.358
ENSMUSG00000095711	Trav14-2	2.547	0.39
ENSMUSG00000022840	Adcy5	2.546	0.388
ENSMUSG00000085311	Gm15445	2.54	0.118
ENSMUSG00000017412	Cacnb4	2.531	0.202
ENSMUSG00000025383	Il23a	2.517	0.371
ENSMUSG00000077285	Gm26394	2.516	0.438
ENSMUSG00000039672	Kcne2	2.493	0.389
ENSMUSG00000042985	Upk3b	2.483	0.121
ENSMUSG00000060314	Zfp941	2.446	0.349
ENSMUSG00000002791	Pdxk-ps	2.434	0.1
ENSMUSG00000029005	Draxin	2.42	0.203
ENSMUSG00000093720	Gm20635	2.41	0.116
ENSMUSG00000041954	Tnfrsf18	2.406	0.209
ENSMUSG00000087424	5730405O15Rik	2.401	0.241
ENSMUSG00000097243	Gm26908	2.341	0.263
ENSMUSG00000018698	Lhx1	2.32	0.0175
ENSMUSG00000072919	Noxred1	2.268	0.433
ENSMUSG00000055323	Gm9967	2.249	0.434
ENSMUSG00000053687	Dpep2	2.245	0.433
ENSMUSG00000035875	AI182371	2.232	0.471
ENSMUSG00000082884	Gm13339	2.231	0.512
ENSMUSG00000026893	Gca	2.227	0.447
ENSMUSG00000097443	Gm17529	2.226	0.326
ENSMUSG00000029503	P2rx2	2.217	0.246
ENSMUSG00000096856	Gm10778	2.203	0.276
ENSMUSG00000040483	Xaf1	2.181	0.0248
ENSMUSG00000081123	Gm11469	2.179	0.463
ENSMUSG00000096727	Psmb9	2.178	0.469
ENSMUSG00000086003	B230206L02Rik	2.165	0.456
ENSMUSG00000001930	Vwf	2.149	0.33
ENSMUSG00000085330	Gm13417	2.099	0.231
ENSMUSG00000058607	Rpl31-ps20	2.055	0.162
ENSMUSG00000086926	Gm6226	2.042	0.254
ENSMUSG00000034837	Gnat1	2.025	0.378
ENSMUSG00000027071	P2rx3	2.009	0.378
ENSMUSG00000035456	Prdm8	1.994	0.427
ENSMUSG00000054556	Gm4876	1.992	0.288
ENSMUSG00000025876	Unc5a	1.975	0.257
ENSMUSG00000104453	Gm37829	1.97	0.119
ENSMUSG00000000154	Slc22a18	1.96	0.519
ENSMUSG00000031618	Nr3c2	1.956	0.14
ENSMUSG00000097140	Gm26779	1.93	0.285
ENSMUSG00000028445	Enho	1.926	0.391
ENSMUSG00000032750	Gab3	1.921	0.241
ENSMUSG00000025537	Phkg1	1.915	0.352
ENSMUSG00000091997	Gm6611	1.913	0.185
ENSMUSG00000103685	Gm37074	1.91	0.487
ENSMUSG00000025466	Fuom	1.906	0.464
ENSMUSG00000085091	Egfros	1.905	0.556
ENSMUSG00000097154	Gm26510	1.905	0.373
ENSMUSG00000026110	Mgat4a	1.896	0.0316
ENSMUSG00000029601	Iqcd	1.894	0.105
ENSMUSG00000078552	Dcdc2b	1.89	0.399
ENSMUSG00000022758	P2rx6	1.882	0.55
ENSMUSG00000038591	Colec10	1.879	0.573
ENSMUSG00000023911	Flywch2	1.875	0.373
ENSMUSG00000034265	Zdhhc14	1.875	0.478
ENSMUSG00000068697	Myoz1	1.853	0.571
ENSMUSG00000060621	Nkpd1	1.849	0.386
ENSMUSG00000020183	Cpm	1.846	0.228
ENSMUSG00000018566	Slc2a4	1.816	0.224
ENSMUSG00000035211	Xrra1	1.804	0.276
ENSMUSG00000023328	Ache	1.795	0.388
ENSMUSG00000035509	Fbxl21	1.775	0.448
ENSMUSG00000017817	Jph2	1.775	0.462
ENSMUSG00000019718	L3hypdh	1.771	0.0464
ENSMUSG00000045102	Poln	1.77	0.0965
ENSMUSG00000104662	RP24-82B23.5	1.767	0.44
ENSMUSG00000050345	4930486L24Rik	1.76	0.143
ENSMUSG00000003559	As3mt	1.758	0.432
ENSMUSG00000012819	Cdh23	1.751	0.315
ENSMUSG00000105272	RP23-164N7.3	1.736	0.0201
ENSMUSG00000039004	Bmp6	1.733	0.471
ENSMUSG00000097579	Gm26799	1.732	0.352
ENSMUSG00000054256	Msi1	1.73	0.24
ENSMUSG00000067889	Sptbn2	1.73	0.0616
ENSMUSG00000039629	Strip2	1.726	0.00914
ENSMUSG00000039798	2600006K01Rik	1.707	0.259
ENSMUSG00000037577	Ephx3	1.704	0.28
ENSMUSG00000030683	Sez6l2	1.7	0.48
ENSMUSG00000039217	Il18	1.691	0.333
ENSMUSG00000082208	Gm15379	1.674	0.366
ENSMUSG00000017969	Ptgis	1.667	0.463
ENSMUSG00000087623	Gm12404	1.654	0.259
ENSMUSG00000085214	0610005C13Rik	1.653	0.324
ENSMUSG00000033717	Adra2a	1.644	0.41
ENSMUSG00000002980	Bcam	1.637	0.323
ENSMUSG00000067872	Ccdc87	1.623	0.545
ENSMUSG00000106961	RP23-186B18.8	1.62	0.415
ENSMUSG00000098183	Gm27010	1.619	0.0586
ENSMUSG00000034245	Hdac11	1.618	0.000538
ENSMUSG00000097728	Gm26840	1.615	0.405
ENSMUSG00000097745	AI115009	1.615	0.199
ENSMUSG00000091329	1700112D23Rik	1.594	0.041
ENSMUSG00000106209	RP23-50I16.2	1.575	0.506
ENSMUSG00000074207	Adh1	1.574	0.691
ENSMUSG00000041577	Prelp	1.573	0.349
ENSMUSG00000035984	Nme5	1.57	0.362
ENSMUSG00000097021	4933433G15Rik	1.564	0.264
ENSMUSG00000056735	A930024E05Rik	1.558	0.102
ENSMUSG00000078653	Cntd1	1.556	0.114
ENSMUSG00000106251	RP24-503L4.4	1.534	0.198
ENSMUSG00000097937	Gm6967	1.53	0.488
ENSMUSG00000063704	Mapk15	1.529	0.493
ENSMUSG00000106383	RP23-231L15.4	1.529	0.00482
ENSMUSG00000027316	Gfra4	1.526	0.251
ENSMUSG00000030306	Tmtc1	1.521	0.592
ENSMUSG00000032062	2310030G06Rik	1.517	0.301
ENSMUSG00000048617	Rtbdn	1.515	0.0409
ENSMUSG00000050957	Insl6	1.514	0.0107
ENSMUSG00000097254	C430042M11Rik	1.512	0.365
ENSMUSG00000096847	Tmem151b	1.51	0.526
ENSMUSG00000096950	Gm9530	1.507	0.114
ENSMUSG00000097383	1500026H17Rik	1.505	0.556
ENSMUSG00000021259	Cyp46a1	1.503	0.21
ENSMUSG00000105368	RP23-459I1.3	1.496	0.143
ENSMUSG00000079669	Gm17396	1.494	0.357
ENSMUSG00000002265	Peg3	1.489	0.459
ENSMUSG00000004837	Grap	1.488	0.677
ENSMUSG00000097812	Gm26812	1.486	0.681
ENSMUSG00000055692	Tmem191c	1.486	0.0734
ENSMUSG00000024013	Fgd2	1.485	0.661
ENSMUSG00000048967	Yjefn3	1.484	0.00696
ENSMUSG00000054594	Oscar	1.481	0.489
ENSMUSG00000043664	Tmem221	1.481	0.212
ENSMUSG00000055675	Kbtbd11	1.48	0.681
ENSMUSG00000029121	Crmp1	1.478	0.447
ENSMUSG00000020340	Cyfip2	1.478	0.336
ENSMUSG00000086108	Gm5602	1.476	0.428
ENSMUSG00000097557	C130060C02Rik	1.47	0.39
ENSMUSG00000078920	Ifi47	1.47	0.271
ENSMUSG00000099146	0610031O16Rik	1.47	0.381
ENSMUSG00000099354	1700124L16Rik	1.469	0.358
ENSMUSG00000084803	5830444B04Rik	1.468	0.548
ENSMUSG00000053914	Kdm4d	1.464	0.565
ENSMUSG00000097115	1810019N24Rik	1.463	0.609
ENSMUSG00000029032	Arhgef16	1.458	0.561
ENSMUSG00000081929	Rps11-ps2	1.457	0.333
ENSMUSG00000063672	Nkx6-3	1.452	0.691
ENSMUSG00000026205	Slc23a3	1.451	0.462
ENSMUSG00000083563	Gm13340	1.45	0.00376
ENSMUSG00000043531	Sorcs1	1.447	0.402
ENSMUSG00000092187	Gm20457	1.447	0.18
ENSMUSG00000106981	RP23-425N12.2	1.444	0.262
ENSMUSG00000053925	Gm9929	1.443	0.124
ENSMUSG00000060923	Acyp2	1.442	0.54
ENSMUSG00000018776	Slc35g3	1.441	0.543
ENSMUSG00000097744	D030040B21Rik	1.439	0.683
ENSMUSG00000053675	Tgm5	1.436	0.68
ENSMUSG00000038143	Stox2	1.435	0.69
ENSMUSG00000098293	Mir6991	1.434	0.681
ENSMUSG00000049811	Fam161a	1.433	0.00543
ENSMUSG00000023473	Celsr3	1.432	0.433
ENSMUSG00000087549	Gm13427	1.432	0.431
ENSMUSG00000054619	Mettl7a1	1.428	0.00248
ENSMUSG00000107499	Ccdc142	1.428	0.233
ENSMUSG00000097784	A430105J06Rik	1.428	0.121
ENSMUSG00000092230	Gm18889	1.428	0.259
ENSMUSG00000051067	Lingo3	1.425	0.512
ENSMUSG00000032726	Bmp8a	1.418	0.12
ENSMUSG00000097747	Gm26534	1.416	0.299
ENSMUSG00000036553	Sh3tc1	1.409	0.224
ENSMUSG00000085148	Mir22hg	1.402	6.9e-19
ENSMUSG00000097239	Gm27029	1.402	0.359
ENSMUSG00000074219	Gm10644	1.399	0.000395
ENSMUSG00000037321	Tap1	1.39	0.00285
ENSMUSG00000089737	Gm15688	1.39	0.758
ENSMUSG00000075410	Gm11744	1.389	0.542
ENSMUSG00000039099	Wdr93	1.384	0.515
ENSMUSG00000007591	Tssk4	1.379	0.162
ENSMUSG00000098062	Gm26931	1.377	0.448
ENSMUSG00000021904	Sema3g	1.374	0.0677
ENSMUSG00000103183	Gm37090	1.369	0.343
ENSMUSG00000017692	Rhbdl3	1.369	0.525
ENSMUSG00000093579	Gm20036	1.358	0.172
ENSMUSG00000029851	Tcaf2	1.356	0.0615
ENSMUSG00000067158	Col4a4	1.35	0.377
ENSMUSG00000027938	Creb3l4	1.347	0.341
ENSMUSG00000009246	Trpm5	1.347	0.341
ENSMUSG00000097015	Gm26705	1.345	0.394
ENSMUSG00000085596	Gm11476	1.343	0.55
ENSMUSG00000107620	RP23-449F12.5	1.343	0.561
ENSMUSG00000070305	Mpzl3	1.34	0.592
ENSMUSG00000097997	Gm27017	1.338	0.537
ENSMUSG00000029348	Asphd2	1.335	0.762
ENSMUSG00000027676	Ccdc39	1.335	0.00492
ENSMUSG00000075014	Gm10800	1.329	0.323
ENSMUSG00000100937	1700020D05Rik	1.326	0.401
ENSMUSG00000061702	Tmem91	1.324	0.399
ENSMUSG00000072809	9330160F10Rik	1.323	0.286
ENSMUSG00000079038	D130040H23Rik	1.311	0.456
ENSMUSG00000036377	C530008M17Rik	1.309	0.0581
ENSMUSG00000021747	4930452B06Rik	1.309	0.492
ENSMUSG00000034949	Zfr2	1.308	0.0752
ENSMUSG00000049409	Prokr1	1.307	0.331
ENSMUSG00000086994	Gm13402	1.307	0.544
ENSMUSG00000085636	Gm11769	1.306	0.219
ENSMUSG00000039814	Xkr5	1.306	0.342
ENSMUSG00000087168	Gm15983	1.306	0.178
ENSMUSG00000004187	Kifc2	1.305	0.000723
ENSMUSG00000097815	Gm26809	1.305	0.271
ENSMUSG00000105198	RP23-158A20.7	1.303	0.461
ENSMUSG00000085006	BC021767	1.301	0.487
ENSMUSG00000047810	Ccdc88b	1.299	0.347
ENSMUSG00000020793	Galr2	1.295	0.187
ENSMUSG00000029605	Oas1b	1.295	0.323
ENSMUSG00000055733	Nap1l3	1.29	0.0181
ENSMUSG00000085054	Gm15834	1.289	0.284
ENSMUSG00000047115	Fam221a	1.288	0.0313
ENSMUSG00000033107	Rnf125	1.284	0.395
ENSMUSG00000064493	Snora28	1.284	0.128
ENSMUSG00000087269	D330023K18Rik	1.283	0.111
ENSMUSG00000085112	A530072M11Rik	1.281	0.289
ENSMUSG00000012126	Ubxn11	1.277	0.231
ENSMUSG00000008153	Clstn3	1.273	0.386
ENSMUSG00000025933	Tmem14a	1.271	0.0565
ENSMUSG00000020689	Itgb3	1.269	0.00574
ENSMUSG00000101711	Gm28306	1.266	0.482
ENSMUSG00000090086	AI480526	1.266	0.00162
ENSMUSG00000085495	Gm16796	1.264	0.461
ENSMUSG00000091712	Sec14l5	1.263	0.566
ENSMUSG00000034687	Fras1	1.261	0.525
ENSMUSG00000002475	Abhd3	1.259	0.287
ENSMUSG00000038630	Zkscan16	1.256	0.626
ENSMUSG00000104164	Gm38248	1.256	0.244
ENSMUSG00000031297	Slc7a3	1.255	0.0212
ENSMUSG00000086342	Gm12932	1.252	0.437
ENSMUSG00000055958	Gm9987	1.247	0.287
ENSMUSG00000073590	3222401L13Rik	1.246	0.394
ENSMUSG00000097935	Gm3809	1.244	0.629
ENSMUSG00000083878	Gm12034	1.243	0.44
ENSMUSG00000064347	mt-Ta	1.24	0.157
ENSMUSG00000034777	Vax2	1.239	0.0852
ENSMUSG00000026188	Tmem169	1.231	0.0176
ENSMUSG00000020658	Efr3b	1.229	0.0266
ENSMUSG00000027858	Tspan2	1.225	0.484
ENSMUSG00000038570	Saxo2	1.225	0.212
ENSMUSG00000097699	5430400D12Rik	1.223	0.473
ENSMUSG00000026208	Des	1.221	0.0358
ENSMUSG00000027801	Tm4sf4	1.221	0.643
ENSMUSG00000047342	Zfp286	1.221	0.398
ENSMUSG00000041809	Efhc1	1.221	0.579
ENSMUSG00000103543	Gm37669	1.219	0.493
ENSMUSG00000105613	RP23-31J24.2	1.218	0.274
ENSMUSG00000098134	Rnf113a2	1.215	0.604
ENSMUSG00000085962	Gm16984	1.215	0.512
ENSMUSG00000089417	Gm22009	1.213	0.525
ENSMUSG00000025172	Ankrd2	1.212	0.647
ENSMUSG00000054003	Tdrd9	1.211	0.332
ENSMUSG00000102018	K230010J24Rik	1.209	0.00202
ENSMUSG00000097103	Gm2885	1.209	0.478
ENSMUSG00000044006	Cilp2	1.206	0.00297
ENSMUSG00000097890	4930547M16Rik	1.205	0.479
ENSMUSG00000030742	Lat	1.205	0.319
ENSMUSG00000104156	Gm38102	1.2	0.226
ENSMUSG00000040287	Stac3	1.199	0.247
ENSMUSG00000089542	Gm25835	1.199	0.314
ENSMUSG00000098024	Gm27003	1.198	0.163
ENSMUSG00000025221	Kcnip2	1.196	0.661
ENSMUSG00000000486	Sept1	1.194	0.0524
ENSMUSG00000031722	Hp	1.194	0.695
ENSMUSG00000097292	A230107N01Rik	1.193	0.367
ENSMUSG00000083688	Gm13743	1.193	0.417
ENSMUSG00000026114	Cnga3	1.19	0.648
ENSMUSG00000070031	Sp140	1.19	0.648
ENSMUSG00000102374	Gm38387	1.189	0.393
ENSMUSG00000043126	D830039M14Rik	1.188	0.425
ENSMUSG00000078771	Evi2a	1.185	0.0325
ENSMUSG00000040495	Chrm4	1.182	0.374
ENSMUSG00000060176	Kif27	1.18	0.626
ENSMUSG00000024354	Slc23a1	1.179	0.352
ENSMUSG00000085498	Gm14023	1.179	0.529
ENSMUSG00000097353	A430046D13Rik	1.172	0.0154
ENSMUSG00000105804	RP23-173N16.4	1.171	0.463
ENSMUSG00000056185	Snx32	1.169	6.55e-07
ENSMUSG00000046719	Nxph3	1.164	0.627
ENSMUSG00000021763	BC067074	1.162	0.451
ENSMUSG00000099879	Gm29123	1.16	0.447
ENSMUSG00000085505	Gm12868	1.159	0.352
ENSMUSG00000089901	Gm8113	1.158	0.411
ENSMUSG00000100548	Gm29585	1.154	0.238
ENSMUSG00000107749	RP23-322E20.6	1.154	0.682
ENSMUSG00000085269	Gm15777	1.153	0.618
ENSMUSG00000060063	Alox5ap	1.152	0.113
ENSMUSG00000097327	E030030I06Rik	1.145	0.0743
ENSMUSG00000001763	Tspan33	1.145	0.356
ENSMUSG00000083557	Gm6877	1.145	0.606
ENSMUSG00000026638	Irf6	1.144	0.59
ENSMUSG00000038188	Scarf1	1.143	0.496
ENSMUSG00000023393	Slc17a9	1.141	0.626
ENSMUSG00000031972	Acta1	1.138	6.85e-06
ENSMUSG00000031489	Adrb3	1.138	0.132
ENSMUSG00000090369	4933411K16Rik	1.138	0.203
ENSMUSG00000003273	Car11	1.135	0.139
ENSMUSG00000105868	RP24-223I19.6	1.132	0.476
ENSMUSG00000106820	RP24-544J6.4	1.131	0.6
ENSMUSG00000097398	Platr5	1.131	0.621
ENSMUSG00000047591	Mafa	1.129	0.0637
ENSMUSG00000061411	Nol4l	1.121	0.326
ENSMUSG00000030532	Hddc3	1.121	0.0722
ENSMUSG00000021631	Mrps36-ps1	1.12	0.374
ENSMUSG00000027470	Mylk2	1.119	0.5
ENSMUSG00000000308	Ckmt1	1.118	0.458
ENSMUSG00000068299	1700019G17Rik	1.114	0.446
ENSMUSG00000050671	Ism2	1.113	0.0313
ENSMUSG00000062064	Slc2a7	1.109	0.649
ENSMUSG00000053541	Gm4759	1.106	0.474
ENSMUSG00000011148	Adssl1	1.105	0.175
ENSMUSG00000023960	Enpp5	1.104	6.56e-05
ENSMUSG00000029452	Tmem116	1.102	0.104
ENSMUSG00000022773	Ypel1	1.101	0.0666
ENSMUSG00000083152	Apc-ps1	1.101	0.628
ENSMUSG00000041132	N4bp2l1	1.097	0.00073
ENSMUSG00000074529	C330013J21Rik	1.097	0.242
ENSMUSG00000103285	Gm37274	1.097	0.603
ENSMUSG00000064646	Gm23300	1.096	0.909
ENSMUSG00000084781	D930015M05Rik	1.095	0.608
ENSMUSG00000016496	Cd274	1.094	0.0345
ENSMUSG00000034059	Ypel4	1.089	0.0812
ENSMUSG00000041362	Shtn1	1.089	0.309
ENSMUSG00000030703	Gdpd3	1.089	0.232
ENSMUSG00000097649	Gm10561	1.088	0.321
ENSMUSG00000100967	Gm29666	1.087	0.276
ENSMUSG00000064367	mt-Nd5	1.086	3.64e-08
ENSMUSG00000054135	A430110L20Rik	1.084	0.587
ENSMUSG00000020656	Grhl1	1.083	0.159
ENSMUSG00000016206	H2-M3	1.076	0.0992
ENSMUSG00000085606	Gm15792	1.074	0.346
ENSMUSG00000074071	Fam169b	1.069	0.0349
ENSMUSG00000031785	Adgrg1	1.067	0.167
ENSMUSG00000096983	2010015M23Rik	1.065	0.033
ENSMUSG00000079652	Fam71f2	1.062	0.318
ENSMUSG00000006218	Fam131c	1.06	0.285
ENSMUSG00000108037	RP24-503A2.6	1.06	0.435
ENSMUSG00000040253	Gbp7	1.059	0.641
ENSMUSG00000086123	Gm16060	1.059	0.578
ENSMUSG00000027297	Ltk	1.055	0.567
ENSMUSG00000096351	Samd11	1.054	0.516
ENSMUSG00000087626	Gm15050	1.053	0.157
ENSMUSG00000000732	Icosl	1.052	0.384
ENSMUSG00000060034	Ctf2	1.051	0.605
ENSMUSG00000021798	Ldb3	1.05	0.0687
ENSMUSG00000002228	Ppm1j	1.05	0.362
ENSMUSG00000036964	Trim17	1.05	0.472
ENSMUSG00000100201	Gm29093	1.05	0.182
ENSMUSG00000064202	4430402I18Rik	1.047	0.574
ENSMUSG00000000530	Acvrl1	1.046	0.398
ENSMUSG00000020227	Irak3	1.045	0.398
ENSMUSG00000030411	Nova2	1.044	0.472
ENSMUSG00000080981	Gm12161	1.043	0.576
ENSMUSG00000100505	Gm13283	1.042	0.53
ENSMUSG00000086968	4933431E20Rik	1.041	0.0002
ENSMUSG00000097150	Gm26513	1.04	0.197
ENSMUSG00000051113	Fam71e1	1.036	0.656
ENSMUSG00000002664	Pspn	1.033	0.514
ENSMUSG00000072571	Tmem253	1.033	0.545
ENSMUSG00000028803	Nipal3	1.032	0.00772
ENSMUSG00000032717	Mdfi	1.031	0.641
ENSMUSG00000096056	Gm21986	1.028	0.357
ENSMUSG00000085957	Syna	1.027	0.587
ENSMUSG00000002831	Plin4	1.027	0.274
ENSMUSG00000104002	Gm38336	1.025	0.546
ENSMUSG00000064363	mt-Nd4	1.025	1.43e-06
ENSMUSG00000003279	Dlgap1	1.024	0.549
ENSMUSG00000073485	H3f3aos	1.024	0.101
ENSMUSG00000105514	RP24-226L20.1	1.024	0.571
ENSMUSG00000104475	D630036G22Rik	1.023	0.008
ENSMUSG00000040498	Igsf23	1.023	0.52
ENSMUSG00000072893	4933439C10Rik	1.019	1.1e-09
ENSMUSG00000097390	Gm26785	1.019	0.393
ENSMUSG00000083282	Ctsf	1.017	0.12
ENSMUSG00000039158	Akna	1.017	0.0252
ENSMUSG00000103922	Gm6123	1.017	0.304
ENSMUSG00000085527	Gm15535	1.015	0.664
ENSMUSG00000108042	RP23-4F16.14	1.015	0.296
ENSMUSG00000103928	Gm37893	1.015	0.0778
ENSMUSG00000070331	Qrich2	1.011	0.74
ENSMUSG00000020891	Alox8	1.009	0.526
ENSMUSG00000032246	Calml4	1.009	0.517
ENSMUSG00000031883	Car7	1.006	0.454
ENSMUSG00000104031	Gm17771	1.006	0.586
ENSMUSG00000107313	RP23-408A1.8	1.005	0.584
ENSMUSG00000025207	Sema4g	1.004	0.00882
ENSMUSG00000036019	Tmtc2	1.004	0.583
ENSMUSG00000070604	Vsig10l	1.002	0.215
ENSMUSG00000039963	Ccdc40	1.002	0.558
ENSMUSG00000106674	RP23-256B18.1	1.002	0.52
ENSMUSG00000038068	Rnf144b	1.002	0.437
ENSMUSG00000040231	Syngr4	0.9994	0.427
ENSMUSG00000056602	Fry	0.9992	0.531
ENSMUSG00000031891	Hsd11b2	0.997	0.457
ENSMUSG00000044052	Ccr10	0.9969	0.198
ENSMUSG00000044258	Ctla2a	0.9967	0.567
ENSMUSG00000004371	Il11	0.9951	0.0846
ENSMUSG00000042510	AA986860	0.9942	0.392
ENSMUSG00000033576	Apol6	0.9934	0.316
ENSMUSG00000100865	Gm9320	0.9932	0.725
ENSMUSG00000051590	Map3k19	0.9914	0.822
ENSMUSG00000039616	Mocos	0.9904	0.0432
ENSMUSG00000056043	Rgs9bp	0.99	0.258
ENSMUSG00000030623	Prss23os	0.9892	0.463
ENSMUSG00000032679	Cd59a	0.9891	0.818
ENSMUSG00000074194	Zfp791	0.9884	0.144
ENSMUSG00000072770	Acrbp	0.9858	0.121
ENSMUSG00000097573	G730003C15Rik	0.9857	0.237
ENSMUSG00000053769	Lysmd1	0.9853	0.325
ENSMUSG00000087523	Gm12319	0.9839	0.317
ENSMUSG00000046415	B430212C06Rik	0.9833	0.528
ENSMUSG00000105107	RP23-214I6.4	0.9824	0.605
ENSMUSG00000042675	Ypel3	0.9814	1.23e-07
ENSMUSG00000103735	Gm38317	0.9813	0.651
ENSMUSG00000042564	Fam227a	0.9805	0.462
ENSMUSG00000044177	Wfikkn2	0.9804	0.754
ENSMUSG00000086350	B230369F24Rik	0.9801	0.527
ENSMUSG00000048458	Fam212b	0.9791	0.00518
ENSMUSG00000097559	D430018E03Rik	0.9784	0.19
ENSMUSG00000082265	Gm15547	0.9762	0.76
ENSMUSG00000025432	Avil	0.9742	0.431
ENSMUSG00000084260	Gm12844	0.9726	0.464
ENSMUSG00000057880	Abat	0.9725	0.463
ENSMUSG00000101211	Gm28818	0.9716	0.805
ENSMUSG00000048096	Lmod1	0.9699	0.375
ENSMUSG00000015944	Gatsl2	0.9691	8.8e-17
ENSMUSG00000027171	Prrg4	0.9689	0.307
ENSMUSG00000050821	Fam131a	0.9676	0.0014
ENSMUSG00000097321	1700028E10Rik	0.9672	0.595
ENSMUSG00000038167	Plekhg6	0.9646	0.392
ENSMUSG00000046807	Lrrc75b	0.9639	0.00751
ENSMUSG00000024534	Sncaip	0.9631	0.813
ENSMUSG00000030020	Prickle2	0.9629	0.454
ENSMUSG00000103440	Gm37131	0.9622	0.437
ENSMUSG00000074218	Cox7a1	0.9599	0.839
ENSMUSG00000108080	RP24-179P9.2	0.9585	0.658
ENSMUSG00000074052	BC048644	0.9532	0.428
ENSMUSG00000045333	Zfp423	0.953	0.527
ENSMUSG00000083261	Gm7816	0.9524	0.465
ENSMUSG00000026303	Mlph	0.9522	0.819
ENSMUSG00000090039	Gm15894	0.9508	0.534
ENSMUSG00000025491	Ifitm1	0.9508	0.246
ENSMUSG00000027840	Wnt2b	0.9499	0.369
ENSMUSG00000027472	Pdrg1	0.9494	1.82e-33
ENSMUSG00000102758	Naaladl2	0.9484	0.357
ENSMUSG00000078519	2310026L22Rik	0.9479	0.503
ENSMUSG00000002346	Slc25a42	0.9463	6.84e-10
ENSMUSG00000107734	RP24-459O3.3	0.9458	0.446
ENSMUSG00000102495	Gm26524	0.9452	0.603
ENSMUSG00000064368	mt-Nd6	0.9441	3.18e-06
ENSMUSG00000059325	Hopx	0.944	0.48
ENSMUSG00000095253	Zfp799	0.9436	0.543
ENSMUSG00000103731	Gm17530	0.9425	0.663
ENSMUSG00000078902	Gm14443	0.9424	0.162
ENSMUSG00000020836	Coro6	0.9404	0.00332
ENSMUSG00000052371	Hoxd3os1	0.9402	0.61
ENSMUSG00000025170	Rab40b	0.9373	0.25
ENSMUSG00000024901	Peli3	0.9356	0.0331
ENSMUSG00000083679	Gm12892	0.9356	0.693
ENSMUSG00000107335	RP23-38B15.1	0.9348	0.513
ENSMUSG00000027896	Slc16a4	0.9343	0.357
ENSMUSG00000002111	Spi1	0.9324	0.71
ENSMUSG00000039838	Slc45a1	0.9319	0.758
ENSMUSG00000087502	Gm16091	0.9318	0.0776
ENSMUSG00000091514	Gm17484	0.9312	0.0881
ENSMUSG00000038777	Sema6c	0.9301	3.49e-05
ENSMUSG00000050394	Armcx6	0.9285	0.394
ENSMUSG00000034579	Pla2g3	0.927	0.683
ENSMUSG00000091102	5830462I19Rik	0.923	0.386
ENSMUSG00000103839	Gm37607	0.9229	0.0533
ENSMUSG00000053552	Ebf4	0.9222	0.0112
ENSMUSG00000085143	Gm11520	0.9208	0.15
ENSMUSG00000044034	Npb	0.9183	0.537
ENSMUSG00000010803	Gabra1	0.9182	0.271
ENSMUSG00000073755	5730409E04Rik	0.9168	0.291
ENSMUSG00000104925	RP23-70G12.3	0.9163	0.827
ENSMUSG00000078915	Hsp25-ps1	0.9155	0.404
ENSMUSG00000103364	Gm38157	0.9152	0.773
ENSMUSG00000049511	Htr1b	0.915	0.0582
ENSMUSG00000063656	Gm10135	0.9142	0.632
ENSMUSG00000107810	RP24-363O21.8	0.9132	0.591
ENSMUSG00000107502	RP24-194N1.2	0.9127	0.599
ENSMUSG00000071633	Gm4952	0.9122	0.666
ENSMUSG00000042109	Csdc2	0.912	0.706
ENSMUSG00000093577	Gm20632	0.9119	0.312
ENSMUSG00000015451	C4a	0.9112	0.116
ENSMUSG00000061815	Rufy4	0.9084	0.767
ENSMUSG00000102550	Gm8276	0.9068	0.25
ENSMUSG00000074243	Gm10651	0.9062	0.538
ENSMUSG00000044081	Zfp85os	0.9046	0.409
ENSMUSG00000090698	Apold1	0.9035	0.394
ENSMUSG00000029096	Htra3	0.903	0.649
ENSMUSG00000001247	Lsr	0.9026	0.652
ENSMUSG00000032596	Uba7	0.8999	0.503
ENSMUSG00000093979	Gm2237	0.8964	0.526
ENSMUSG00000064370	mt-Cytb	0.8952	5.71e-06
ENSMUSG00000025175	Fn3k	0.895	0.837
ENSMUSG00000040327	Cul9	0.895	0.628
ENSMUSG00000043557	Mdga1	0.8949	0.762
ENSMUSG00000021298	Gpr132	0.8948	0.844
ENSMUSG00000090207	4930524O07Rik	0.8946	0.483
ENSMUSG00000060275	Nrg2	0.8934	0.525
ENSMUSG00000036733	Rbm42	0.8933	0.378
ENSMUSG00000025610	Map3k7cl	0.8923	0.545
ENSMUSG00000030087	Klf15	0.8916	0.204
ENSMUSG00000075592	Nynrin	0.8911	0.73
ENSMUSG00000045775	Slc16a5	0.8897	0.694
ENSMUSG00000038295	Atg9b	0.8893	0.00641
ENSMUSG00000077212	Snord69	0.8886	0.491
ENSMUSG00000026235	Epha4	0.8878	0.559
ENSMUSG00000041439	Mfsd6	0.8868	0.76
ENSMUSG00000099634	Gm29462	0.8864	0.569
ENSMUSG00000026950	Neb	0.8846	0.774
ENSMUSG00000023094	Msrb2	0.8838	0.659
ENSMUSG00000043391	2510009E07Rik	0.8826	0.256
ENSMUSG00000087247	Fam150a	0.8819	0.26
ENSMUSG00000062309	Rpp25	0.8795	0.513
ENSMUSG00000024055	Cyp4f13	0.8793	0.0924
ENSMUSG00000100337	Gm5066	0.8785	0.775
ENSMUSG00000032561	Acpp	0.878	0.148
ENSMUSG00000040247	Tbc1d10c	0.8777	0.22
ENSMUSG00000080836	Gm6444	0.8771	0.654
ENSMUSG00000053714	4732471J01Rik	0.8759	0.473
ENSMUSG00000102882	Gm2065	0.8755	0.54
ENSMUSG00000086728	Man2c1os	0.8747	0.42
ENSMUSG00000090093	Gm14399	0.8745	0.0399
ENSMUSG00000034818	Celf5	0.8743	0.113
ENSMUSG00000054582	Pabpc1l	0.8727	0.0983
ENSMUSG00000064351	mt-Co1	0.8721	0.000109
ENSMUSG00000050334	C130071C03Rik	0.8711	0.0321
ENSMUSG00000032850	Rnft2	0.8709	0.000512
ENSMUSG00000038074	Fkbp14	0.8708	0.000213
ENSMUSG00000036872	Abcc12	0.8706	0.693
ENSMUSG00000097048	1600020E01Rik	0.8691	1.51e-08
ENSMUSG00000018238	Gdf9	0.8683	0.591
ENSMUSG00000022562	Oplah	0.868	0.0672
ENSMUSG00000048721	Fndc9	0.864	0.838
ENSMUSG00000062028	Irgc1	0.8634	0.848
ENSMUSG00000028328	Tmod1	0.8632	0.574
ENSMUSG00000033268	Duox1	0.8628	0.0393
ENSMUSG00000080797	Gm15760	0.8627	0.605
ENSMUSG00000085184	4933439K11Rik	0.8614	0.705
ENSMUSG00000028407	Toporsos	0.8609	0.203
ENSMUSG00000097246	Gm26890	0.86	0.566
ENSMUSG00000028088	Fmo5	0.8598	0.702
ENSMUSG00000049404	Rarres1	0.8593	0.642
ENSMUSG00000084925	1810062O18Rik	0.8592	0.6
ENSMUSG00000031828	Klhl36	0.8587	0.409
ENSMUSG00000024459	H2-M5	0.8579	0.677
ENSMUSG00000083392	Gm6335	0.8579	0.638
ENSMUSG00000021573	Tppp	0.8578	0.728
ENSMUSG00000069899	Gm12166	0.8577	0.335
ENSMUSG00000028476	Reck	0.8572	0.00371
ENSMUSG00000052160	Pld4	0.857	0.838
ENSMUSG00000096096	Trav4-4-dv10	0.8568	0.777
ENSMUSG00000074039	4930520O04Rik	0.8559	0.179
ENSMUSG00000020599	Rgs9	0.8546	0.666
ENSMUSG00000027661	Slc2a10	0.8534	0.116
ENSMUSG00000031351	Zfp185	0.8532	0.498
ENSMUSG00000046372	Gm5590	0.853	0.59
ENSMUSG00000029650	Slc46a3	0.8521	0.448
ENSMUSG00000026809	1700026L06Rik	0.8519	0.644
ENSMUSG00000086815	3110082J24Rik	0.8513	0.851
ENSMUSG00000036641	Ccdc148	0.8504	0.595
ENSMUSG00000040265	Dnm3	0.8498	0.65
ENSMUSG00000093314	Mir5136	0.8497	0.52
ENSMUSG00000086035	Gm12610	0.8496	0.603
ENSMUSG00000089679	Gm16299	0.8492	0.515
ENSMUSG00000027939	Nup210l	0.8482	0.0188
ENSMUSG00000071656	Lrrn4cl	0.8479	0.026
ENSMUSG00000039763	Dnajc28	0.8479	0.00762
ENSMUSG00000031790	Mmp15	0.8472	0.0702
ENSMUSG00000059430	Actg2	0.8466	0.0396
ENSMUSG00000038540	Tmc3	0.8438	0.48
ENSMUSG00000079414	Gm11110	0.8415	0.259
ENSMUSG00000097746	Gm6225	0.8389	0.495
ENSMUSG00000022217	Emc9	0.8372	0.00252
ENSMUSG00000052981	Ube2ql1	0.8372	0.518
ENSMUSG00000089984	Fbxo24	0.837	0.349
ENSMUSG00000090031	4732440D04Rik	0.8361	0.00252
ENSMUSG00000021066	Atl1	0.8359	0.185
ENSMUSG00000039853	Trim14	0.8356	0.691
ENSMUSG00000097838	C530050E15Rik	0.8351	0.18
ENSMUSG00000052396	Mogat2	0.8345	0.411
ENSMUSG00000078853	Igtp	0.8343	0.0756
ENSMUSG00000097610	A930012L18Rik	0.8341	0.663
ENSMUSG00000034858	Fam214a	0.8339	0.00111
ENSMUSG00000040428	Plekha4	0.8333	0.165
ENSMUSG00000024899	Papss2	0.8321	8.85e-06
ENSMUSG00000098105	Gm8825	0.8317	0.705
ENSMUSG00000107253	RP23-42M8.2	0.8315	0.691
ENSMUSG00000073680	Tmem88b	0.8298	0.398
ENSMUSG00000104093	A330015K06Rik	0.8297	0.661
ENSMUSG00000097279	Gm5106	0.8295	0.573
ENSMUSG00000073233	Gm9144	0.8295	0.295
ENSMUSG00000048592	Gm5946	0.8292	0.588
ENSMUSG00000071691	Gm960	0.829	0.636
ENSMUSG00000045761	Fam179a	0.8287	0.567
ENSMUSG00000034614	Pik3ip1	0.8263	0.0261
ENSMUSG00000049357	4933408B17Rik	0.825	0.469
ENSMUSG00000024379	Tslp	0.8249	0.315
ENSMUSG00000061724	Gm2423	0.8248	0.534
ENSMUSG00000032754	Slc8b1	0.8233	0.00019
ENSMUSG00000087578	Ccdc142os	0.8226	0.444
ENSMUSG00000027713	1810062G17Rik	0.822	0.218
ENSMUSG00000026748	Plxdc2	0.8197	0.00736
ENSMUSG00000040904	Gm21988	0.8185	0.407
ENSMUSG00000030895	Hpx	0.818	0.691
ENSMUSG00000036764	Dnajc12	0.817	0.00326
ENSMUSG00000038009	Dnajc22	0.8167	0.224
ENSMUSG00000087190	D430001F17Rik	0.8156	0.385
ENSMUSG00000072915	Gm12258	0.8153	0.000563
ENSMUSG00000006567	Atp7b	0.8151	0.642
ENSMUSG00000059013	Sh2d3c	0.8148	0.0233
ENSMUSG00000058396	Gpr182	0.8137	0.509
ENSMUSG00000097183	Gm17501	0.8135	1.91e-12
ENSMUSG00000023868	Pde10a	0.8133	0.588
ENSMUSG00000098176	Ccdc166	0.8121	0.415
ENSMUSG00000074500	Zfp558	0.8113	0.538
ENSMUSG00000006221	Hspb7	0.8103	0.546
ENSMUSG00000048029	Eno4	0.81	0.394
ENSMUSG00000022847	Thpo	0.809	0.0754
ENSMUSG00000097448	Platr22	0.8084	0.3
ENSMUSG00000034391	Fbxo15	0.8076	0.655
ENSMUSG00000097811	2810425M01Rik	0.8072	0.647
ENSMUSG00000029596	Sdsl	0.8064	0.217
ENSMUSG00000097643	A130051J06Rik	0.8054	0.508
ENSMUSG00000094683	Ap3m1-ps	0.8046	0.437
ENSMUSG00000035783	Acta2	0.8028	0.00482
ENSMUSG00000036002	Fam214b	0.801	4.94e-08
ENSMUSG00000002578	Ikzf4	0.8009	0.257
ENSMUSG00000032243	Itga11	0.7998	0.000991
ENSMUSG00000070997	1700055D18Rik	0.7989	0.41
ENSMUSG00000093402	Gm18588	0.7988	0.294
ENSMUSG00000041775	Mapk1ip1	0.7983	0.0207
ENSMUSG00000096883	Shisa8	0.7982	0.706
ENSMUSG00000034917	Tjp3	0.7977	0.597
ENSMUSG00000086528	Gm15731	0.7971	0.355
ENSMUSG00000023999	Kif6	0.7966	0.634
ENSMUSG00000030337	Vamp1	0.7964	0.00406
ENSMUSG00000098188	Sowahc	0.7961	0.626
ENSMUSG00000092626	9130230N09Rik	0.7953	0.39
ENSMUSG00000031445	Proz	0.7953	0.556
ENSMUSG00000081137	BC022960	0.7943	0.0367
ENSMUSG00000008307	1700109H08Rik	0.7937	0.244
ENSMUSG00000024987	Cyp26a1	0.7915	0.633
ENSMUSG00000102241	Gm37716	0.7915	0.645
ENSMUSG00000026786	Apbb1ip	0.7908	0.312
ENSMUSG00000023806	Rsph3b	0.7902	0.104
ENSMUSG00000078838	Gm17382	0.7888	0.651
ENSMUSG00000074646	6430550D23Rik	0.7886	0.234
ENSMUSG00000044043	Pcdhb14	0.7877	0.396
ENSMUSG00000022747	St3gal6	0.7872	0.592
ENSMUSG00000085433	Gm16001	0.7872	0.0692
ENSMUSG00000028565	Nfia	0.7871	0.514
ENSMUSG00000028825	Rhd	0.7864	0.688
ENSMUSG00000064337	mt-Rnr1	0.7854	0.00788
ENSMUSG00000046312	AI464131	0.7837	1.28e-05
ENSMUSG00000104891	RP23-434H17.3	0.7835	0.702
ENSMUSG00000018752	Tnfsfm13	0.7824	0.0197
ENSMUSG00000043068	Fam89a	0.7816	0.166
ENSMUSG00000020475	Pgam2	0.7814	0.225
ENSMUSG00000097781	9330136K24Rik	0.7811	0.395
ENSMUSG00000020798	Spns3	0.781	0.738
ENSMUSG00000097378	B230208H11Rik	0.7793	0.112
ENSMUSG00000068601	Gm10244	0.7781	0.696
ENSMUSG00000044197	Gpr146	0.7779	0.0593
ENSMUSG00000042156	Dzip1	0.7771	3.12e-11
ENSMUSG00000105552	RP23-114P22.5	0.7763	0.383
ENSMUSG00000006342	Susd2	0.776	0.618
ENSMUSG00000091462	Gm17084	0.776	0.684
ENSMUSG00000103367	Gm38158	0.7753	0.0539
ENSMUSG00000038065	Mturn	0.7752	0.238
ENSMUSG00000075514	Gm13375	0.7752	0.0782
ENSMUSG00000093587	Gm20554	0.7746	0.406
ENSMUSG00000044165	Bcl2l15	0.7742	0.725
ENSMUSG00000086943	4732414G09Rik	0.7742	0.71
ENSMUSG00000042810	Krba1	0.7741	0.527
ENSMUSG00000026791	Slc2a8	0.774	5.31e-06
ENSMUSG00000039908	Slc26a11	0.774	3.43e-07
ENSMUSG00000101678	Gm29609	0.7734	0.494
ENSMUSG00000058812	0610039K10Rik	0.7727	0.69
ENSMUSG00000025359	Pmel	0.7722	0.335
ENSMUSG00000096980	Gm26526	0.7722	0.677
ENSMUSG00000002043	Trappc6a	0.7719	8.24e-05
ENSMUSG00000030022	Adamts9	0.7718	0.341
ENSMUSG00000015467	Egfl8	0.7711	0.424
ENSMUSG00000107066	RP23-46L17.4	0.7709	0.532
ENSMUSG00000096557	Gm7258	0.7706	0.618
ENSMUSG00000072660	Gm6288	0.7704	0.608
ENSMUSG00000079547	H2-DMb1	0.77	0.0421
ENSMUSG00000017713	Tha1	0.7695	0.288
ENSMUSG00000097752	Gm26688	0.7675	0.589
ENSMUSG00000040009	Gnaz	0.7672	0.161
ENSMUSG00000107352	RP24-80F7.3	0.767	0.286
ENSMUSG00000020810	Cygb	0.7667	0.644
ENSMUSG00000020491	2810021J22Rik	0.7666	0.289
ENSMUSG00000019359	Gdpd2	0.7662	0.607
ENSMUSG00000025489	Ifitm5	0.766	0.645
ENSMUSG00000074166	AW146154	0.7658	0.0708
ENSMUSG00000050777	Tmem37	0.7657	0.742
ENSMUSG00000082423	Gm15148	0.7655	0.666
ENSMUSG00000038967	Pdk2	0.7645	0.00546
ENSMUSG00000026471	Mr1	0.7642	0.0337
ENSMUSG00000028931	Kcnab2	0.7641	0.0786
ENSMUSG00000072115	Ang	0.7639	0.0506
ENSMUSG00000020732	Rab37	0.7622	0.697
ENSMUSG00000073888	Ccl27a	0.762	0.613
ENSMUSG00000042842	Serpinb6b	0.762	0.637
ENSMUSG00000085929	Gm13421	0.7618	0.302
ENSMUSG00000085055	Gm15958	0.7597	0.591
ENSMUSG00000086890	1700021J08Rik	0.7589	0.734
ENSMUSG00000053626	Tll1	0.7576	0.0002
ENSMUSG00000038700	Hoxb5	0.757	0.547
ENSMUSG00000037266	Rsrp1	0.757	1.14e-14
ENSMUSG00000025401	Myo1a	0.7564	0.426
ENSMUSG00000026200	Glb1l	0.7561	0.00089
ENSMUSG00000035818	Plekhs1	0.7559	0.177
ENSMUSG00000050315	Synpo2	0.7556	0.146
ENSMUSG00000064345	mt-Nd2	0.7545	4.34e-05
ENSMUSG00000105340	Mapkapk5	0.7532	0.349
ENSMUSG00000104795	RP23-204O17.4	0.7532	0.441
ENSMUSG00000024039	Cbs	0.753	0.658
ENSMUSG00000106990	RP23-23C4.6	0.7529	0.000891
ENSMUSG00000100084	2310068J16Rik	0.7526	0.306
ENSMUSG00000047909	Ankrd16	0.7519	3.73e-09
ENSMUSG00000001128	Cfp	0.7517	0.00915
ENSMUSG00000008438	Adam21	0.75	0.694
ENSMUSG00000099923	1700105P06Rik	0.7493	0.39
ENSMUSG00000042289	Hsd3b7	0.748	7.54e-07
ENSMUSG00000048965	Mrgpre	0.7479	0.00618
ENSMUSG00000097411	B430218F22Rik	0.7479	0.494
ENSMUSG00000102881	Gm3807	0.7476	0.648
ENSMUSG00000010601	Apol7a	0.7472	0.54
ENSMUSG00000099779	Gm8228	0.7468	0.445
ENSMUSG00000006395	Hyi	0.7463	2.44e-05
ENSMUSG00000000093	Tbx2	0.7454	0.525
ENSMUSG00000107954	RP23-25K2.4	0.7448	0.649
ENSMUSG00000097635	Gm26826	0.7446	0.477
ENSMUSG00000073460	Pnldc1	0.7442	0.333
ENSMUSG00000030717	Nupr1	0.744	3.16e-15
ENSMUSG00000018427	Ypel2	0.7433	0.0121
ENSMUSG00000035032	Nek11	0.7427	0.737
ENSMUSG00000060791	Gmfg	0.7424	0.643
ENSMUSG00000048852	Gm12185	0.7423	0.694
ENSMUSG00000032911	Cspg4	0.7419	1.7e-07
ENSMUSG00000086915	Gm16365	0.7418	0.349
ENSMUSG00000031129	Slc9a9	0.741	0.545
ENSMUSG00000038692	Hoxb4	0.7409	0.00314
ENSMUSG00000036151	Tm6sf2	0.7406	0.569
ENSMUSG00000021265	Slc25a29	0.7399	0.07
ENSMUSG00000060240	Cend1	0.7396	0.15
ENSMUSG00000057143	Trim12c	0.7382	0.726
ENSMUSG00000051726	Kcnf1	0.738	0.402
ENSMUSG00000024793	Tnfrsf25	0.7378	0.431
ENSMUSG00000096992	Gm26788	0.7374	0.646
ENSMUSG00000097439	Gm16754	0.7372	0.244
ENSMUSG00000081210	Gm12933	0.7372	0.644
ENSMUSG00000095123	Gm21781	0.7363	0.0118
ENSMUSG00000090873	Gm17112	0.7361	0.647
ENSMUSG00000021123	Rdh12	0.7356	0.402
ENSMUSG00000006494	Pdk1	0.7352	2.06e-10
ENSMUSG00000028860	Sytl1	0.7337	0.516
ENSMUSG00000059554	Ccdc28a	0.7334	0.00587
ENSMUSG00000089992	G6pd2	0.733	0.718
ENSMUSG00000052783	Grk4	0.7325	0.137
ENSMUSG00000036564	Ndrg4	0.7315	2.62e-20
ENSMUSG00000100747	1700084E18Rik	0.7314	0.202
ENSMUSG00000049555	Tmie	0.7303	0.436
ENSMUSG00000032121	Tmem218	0.7302	0.0121
ENSMUSG00000097576	D930030I03Rik	0.7296	0.595
ENSMUSG00000035936	Aldh5a1	0.7295	0.00797
ENSMUSG00000105881	RP23-371A16.3	0.7295	0.298
ENSMUSG00000085396	Firre	0.7283	2.11e-11
ENSMUSG00000020707	Rnf135	0.7273	0.00774
ENSMUSG00000097261	4930532G15Rik	0.7272	0.645
ENSMUSG00000101814	Gm17807	0.7263	0.485
ENSMUSG00000062743	Zfp677	0.7258	0.534
ENSMUSG00000059326	Csf2ra	0.7255	0.248
ENSMUSG00000045506	A930002H24Rik	0.7251	0.332
ENSMUSG00000085442	Gm3362	0.725	0.587
ENSMUSG00000087377	AV099323	0.7238	0.285
ENSMUSG00000078452	Raet1d	0.7225	0.0206
ENSMUSG00000091971	Hspa1a	0.7224	0.698
ENSMUSG00000064372	mt-Tp	0.7219	0.717
ENSMUSG00000085687	Gm16153	0.7213	0.0902
ENSMUSG00000025420	Katnal2	0.7209	0.0045
ENSMUSG00000062310	Glrp1	0.7204	0.753
ENSMUSG00000027894	Slc6a17	0.7201	0.577
ENSMUSG00000050954	Zfp169	0.7201	0.0374
ENSMUSG00000031480	Thsd1	0.7188	0.0208
ENSMUSG00000026831	1700007K13Rik	0.7183	0.628
ENSMUSG00000026255	Efhd1	0.7172	0.641
ENSMUSG00000020175	Rab36	0.7168	0.0413
ENSMUSG00000027580	Helz2	0.7153	1.98e-06
ENSMUSG00000064115	Cadm2	0.715	0.514
ENSMUSG00000074355	Gm10676	0.7149	0.098
ENSMUSG00000047875	Gpr157	0.7134	0.0861
ENSMUSG00000025586	Cpeb1	0.7132	0.0956
ENSMUSG00000089940	Gm4117	0.7128	0.654
ENSMUSG00000045466	Zfp956	0.7122	0.00128
ENSMUSG00000097090	Gm26724	0.712	0.158
ENSMUSG00000020335	Zfp354b	0.7102	0.675
ENSMUSG00000029153	Ociad2	0.7101	0.516
ENSMUSG00000082345	Gm13622	0.7101	0.623
ENSMUSG00000030882	Dnhd1	0.7096	0.234
ENSMUSG00000021260	Hhipl1	0.7079	0.286
ENSMUSG00000070687	Htr1d	0.7077	0.629
ENSMUSG00000040714	Klc3	0.707	0.0876
ENSMUSG00000006651	Aplp1	0.7058	0.448
ENSMUSG00000052154	Gm9870	0.7058	0.58
ENSMUSG00000087008	Gm5530	0.7052	0.718
ENSMUSG00000104113	Gm37292	0.7052	0.731
ENSMUSG00000105679	RP23-307I19.1	0.705	0.74
ENSMUSG00000092241	Gm20522	0.705	0.422
ENSMUSG00000104719	RP23-431M7.4	0.7047	0.474
ENSMUSG00000041729	Coro2b	0.7041	0.000444
ENSMUSG00000036368	Rmdn2	0.7036	0.516
ENSMUSG00000042286	Stab1	0.7031	0.428
ENSMUSG00000033029	1700088E04Rik	0.7026	0.3
ENSMUSG00000023484	Prph	0.7016	0.282
ENSMUSG00000082028	Gm1826	0.7015	0.597
ENSMUSG00000064340	mt-Tl1	0.7008	0.136
ENSMUSG00000054939	Zfp174	0.7007	0.114
ENSMUSG00000028211	Trp53inp1	0.7005	0.0592
ENSMUSG00000105077	RP24-325G15.2	0.7004	0.659
ENSMUSG00000027966	Col11a1	0.7001	0.0213
ENSMUSG00000037593	BC030499	0.6999	0.652
ENSMUSG00000020057	Dram1	0.6998	0.00102
ENSMUSG00000033460	Armcx1	0.6998	0.458
ENSMUSG00000092223	Gm19807	0.6997	0.537
ENSMUSG00000003545	Fosb	0.6996	0.271
ENSMUSG00000055862	Izumo4	0.6991	0.143
ENSMUSG00000096986	4930509E16Rik	0.6988	0.548
ENSMUSG00000019647	Sema6a	0.6978	0.44
ENSMUSG00000049892	Rasd1	0.6954	0.488
ENSMUSG00000028036	Ptgfr	0.6952	0.65
ENSMUSG00000040219	Ttc12	0.695	0.366
ENSMUSG00000108053	RP24-317F6.7	0.6949	0.566
ENSMUSG00000097792	Gm27042	0.6943	0.119
ENSMUSG00000080824	Gm9001	0.6943	0.674
ENSMUSG00000085162	Gm12295	0.6934	0.738
ENSMUSG00000017390	Aldoc	0.6931	0.331
ENSMUSG00000058586	Serhl	0.6928	2.34e-06
ENSMUSG00000102140	Gm38058	0.6926	0.769
ENSMUSG00000031389	Arhgap4	0.6924	0.755
ENSMUSG00000029098	Acox3	0.6924	4.36e-07
ENSMUSG00000099034	2810039B14Rik	0.6922	0.38
ENSMUSG00000078716	Tmem8b	0.6921	0.0288
ENSMUSG00000025500	Lmntd2	0.6916	0.365
ENSMUSG00000075276	Gm13653	0.6908	0.623
ENSMUSG00000085525	Gm13166	0.6905	0.663
ENSMUSG00000086877	A230072C01Rik	0.6898	0.0907
ENSMUSG00000027570	Col9a3	0.6886	0.522
ENSMUSG00000028681	Ptch2	0.688	0.671
ENSMUSG00000035642	Aamdc	0.6877	0.0004
ENSMUSG00000006538	Ihh	0.6874	0.704
ENSMUSG00000077575	Gm24888	0.6868	0.747
ENSMUSG00000087222	E030042O20Rik	0.6866	0.684
ENSMUSG00000096795	Zfp433	0.6866	0.41
ENSMUSG00000097360	9430065F17Rik	0.6857	0.648
ENSMUSG00000027030	Stk39	0.685	0.373
ENSMUSG00000091993	B930036N10Rik	0.6849	0.579
ENSMUSG00000035033	Tbr1	0.6844	0.668
ENSMUSG00000041000	Trim62	0.6842	0.264
ENSMUSG00000038893	Fam117a	0.6839	0.0265
ENSMUSG00000078485	Plekhn1	0.6838	0.0216
ENSMUSG00000032298	Neil1	0.6838	8.57e-05
ENSMUSG00000071723	Gspt2	0.6835	0.464
ENSMUSG00000049100	Pcdh10	0.6827	0.322
ENSMUSG00000034853	Acot11	0.682	0.754
ENSMUSG00000039450	Dcxr	0.6819	0.00121
ENSMUSG00000002109	Ddb2	0.6809	0.0132
ENSMUSG00000064341	mt-Nd1	0.6809	0.00131
ENSMUSG00000029410	Ppef2	0.6805	0.623
ENSMUSG00000068740	Celsr2	0.6803	0.298
ENSMUSG00000097233	Gm17552	0.68	0.0101
ENSMUSG00000013158	4933405L10Rik	0.6791	0.618
ENSMUSG00000023764	Sfi1	0.6791	0.00228
ENSMUSG00000031840	Rab3a	0.6781	0.000618
ENSMUSG00000081121	Gm12791	0.6772	0.715
ENSMUSG00000104686	RP24-255F19.5	0.6768	0.381
ENSMUSG00000106099	RP23-235E15.6	0.6768	0.485
ENSMUSG00000035237	Lcat	0.6767	0.0164
ENSMUSG00000097564	C430014B12Rik	0.6764	0.688
ENSMUSG00000032839	Trpc1	0.6758	0.000714
ENSMUSG00000097093	C330013E15Rik	0.6756	0.59
ENSMUSG00000019066	Rab3d	0.6756	0.00181
ENSMUSG00000040713	Creg1	0.6753	0.000256
ENSMUSG00000030284	Creld1	0.6743	9.98e-08
ENSMUSG00000081232	Gm14373	0.6742	0.649
ENSMUSG00000066442	Mthfs	0.6727	0.681
ENSMUSG00000063698	Sfxn4	0.6713	0.0443
ENSMUSG00000107726	RP23-47A6.5	0.6703	0.796
ENSMUSG00000025262	Fam120c	0.668	0.105
ENSMUSG00000029019	Nppb	0.6675	0.141
ENSMUSG00000085890	Tnfsf13os	0.6664	0.704
ENSMUSG00000065782	Gm22680	0.6664	0.791
ENSMUSG00000089989	Flt3l	0.665	0.193
ENSMUSG00000091498	Mpc1-ps	0.6645	0.107
ENSMUSG00000034570	Inpp5j	0.6642	0.263
ENSMUSG00000024049	Myom1	0.6642	0.508
ENSMUSG00000031391	L1cam	0.6632	0.281
ENSMUSG00000107509	RP24-417N21.5	0.6626	0.69
ENSMUSG00000049946	BC030500	0.6626	0.774
ENSMUSG00000028845	Tekt2	0.6622	0.507
ENSMUSG00000031133	Arhgef6	0.6618	0.806
ENSMUSG00000036292	Gramd1c	0.6612	0.588
ENSMUSG00000058260	Serpina9	0.6587	0.798
ENSMUSG00000087436	Gm16156	0.6582	0.394
ENSMUSG00000019997	Ctgf	0.658	1.95e-16
ENSMUSG00000039474	Wfs1	0.658	1.37e-08
ENSMUSG00000050106	Tmc8	0.6575	0.768
ENSMUSG00000021876	Rnase4	0.6563	0.000486
ENSMUSG00000016493	Cd46	0.6559	0.634
ENSMUSG00000034177	Rnf43	0.6558	0.518
ENSMUSG00000072884	Gm10433	0.6555	0.811
ENSMUSG00000046204	Pnma2	0.6546	0.705
ENSMUSG00000086753	Gm15751	0.6543	0.2
ENSMUSG00000021070	Bdkrb2	0.6536	0.664
ENSMUSG00000039632	Ccdc151	0.6534	0.623
ENSMUSG00000050368	Hoxd10	0.6525	0.418
ENSMUSG00000089669	Tnfsf13	0.6525	0.608
ENSMUSG00000032135	Mcam	0.6523	3.33e-11
ENSMUSG00000038775	Vill	0.652	0.213
ENSMUSG00000086016	1700084C06Rik	0.6516	0.784
ENSMUSG00000084342	Gm11224	0.6514	0.591
ENSMUSG00000043020	Wdr63	0.6506	0.795
ENSMUSG00000042500	Ago4	0.6494	0.627
ENSMUSG00000097386	9130213A22Rik	0.6493	0.736
ENSMUSG00000029136	Rbks	0.6491	0.412
ENSMUSG00000097026	Gm26786	0.649	0.456
ENSMUSG00000103756	Gm37285	0.6481	0.377
ENSMUSG00000028195	Cyr61	0.6471	2e-15
ENSMUSG00000105895	RP23-407I6.2	0.6466	0.71
ENSMUSG00000022197	Pdzd2	0.6462	0.000422
ENSMUSG00000007030	Vwa7	0.6461	0.719
ENSMUSG00000086283	2810433D01Rik	0.646	0.488
ENSMUSG00000011832	Evi5l	0.6448	1.26e-07
ENSMUSG00000061769	Klra6	0.6446	0.448
ENSMUSG00000037235	Mxd4	0.6441	2.71e-07
ENSMUSG00000034275	Igsf9b	0.6438	0.341
ENSMUSG00000097056	Gm4262	0.6435	0.204
ENSMUSG00000018543	1700001P01Rik	0.6434	0.812
ENSMUSG00000067928	Zfp760	0.6428	0.276
ENSMUSG00000041609	Ccdc64	0.6424	0.00633
ENSMUSG00000082691	Dynlt1-ps1	0.6423	0.177
ENSMUSG00000085956	4930481B07Rik	0.6416	0.532
ENSMUSG00000106025	RP23-453M11.4	0.6413	0.754
ENSMUSG00000097944	A130014A01Rik	0.641	0.0584
ENSMUSG00000034854	Mfsd12	0.6401	1.88e-07
ENSMUSG00000100599	1700120C14Rik	0.64	0.481
ENSMUSG00000021453	Gadd45g	0.6395	3.47e-17
ENSMUSG00000042099	Kank3	0.6387	0.306
ENSMUSG00000025082	Vwa2	0.6384	0.81
ENSMUSG00000103593	Gm37352	0.6384	0.04
ENSMUSG00000031079	Zfp300	0.6378	0.307
ENSMUSG00000005951	Shpk	0.6376	0.186
ENSMUSG00000009739	Pou6f1	0.6366	0.205
ENSMUSG00000105954	RP24-299A7.2	0.6364	0.526
ENSMUSG00000073778	Faddos	0.6358	0.738
ENSMUSG00000053226	Dand5	0.6357	0.01
ENSMUSG00000031539	Ap3m2	0.6344	0.000133
ENSMUSG00000038260	Trpm4	0.6342	0.000227
ENSMUSG00000093437	Gm20702	0.6342	0.701
ENSMUSG00000022548	Apod	0.6337	0.844
ENSMUSG00000085174	Gm16206	0.6323	0.754
ENSMUSG00000021120	Pigh	0.6321	0.00302
ENSMUSG00000042408	Zmym6	0.632	1.27e-06
ENSMUSG00000040631	Dok4	0.6318	1.79e-05
ENSMUSG00000027636	Sla2	0.6314	0.477
ENSMUSG00000062515	Fabp4	0.6305	0.172
ENSMUSG00000073600	Prob1	0.6303	0.278
ENSMUSG00000030428	Ttyh1	0.6299	0.529
ENSMUSG00000044231	Nhlrc1	0.6296	0.725
ENSMUSG00000099061	Gm28050	0.6295	0.473
ENSMUSG00000035473	Galm	0.6293	0.228
ENSMUSG00000098235	Gm7497	0.6272	0.593
ENSMUSG00000035678	Tnfsf9	0.6271	0.0204
ENSMUSG00000069184	Zfp72	0.627	0.0918
ENSMUSG00000098022	Zfp82	0.6265	0.608
ENSMUSG00000023045	Soat2	0.6263	0.744
ENSMUSG00000091623	Gm17092	0.626	0.575
ENSMUSG00000086539	Gm16759	0.6258	0.608
ENSMUSG00000033540	Idua	0.6256	0.00232
ENSMUSG00000048240	Gng7	0.625	1.05e-06
ENSMUSG00000097674	Gm26610	0.6247	0.648
ENSMUSG00000064797	Gm24357	0.6245	0.694
ENSMUSG00000038349	Plcl1	0.6244	0.762
ENSMUSG00000086389	Gm15998	0.6241	0.19
ENSMUSG00000034035	Ccdc17	0.6238	0.531
ENSMUSG00000005107	Slc2a9	0.6237	0.831
ENSMUSG00000049719	Prss46	0.623	0.691
ENSMUSG00000083240	Gm13453	0.6228	0.425
ENSMUSG00000059970	Hspa2	0.6225	0.000107
ENSMUSG00000020083	2010107G23Rik	0.6221	0.591
ENSMUSG00000040883	Tmem205	0.6216	0.0278
ENSMUSG00000022383	Ppara	0.6216	0.58
ENSMUSG00000039747	Orai2	0.6212	0.000109
ENSMUSG00000052563	D930048N14Rik	0.6208	0.0158
ENSMUSG00000006958	Chrd	0.6205	0.00374
ENSMUSG00000002257	Def6	0.6204	0.574
ENSMUSG00000054252	Fgfr3	0.6204	1.13e-06
ENSMUSG00000083692	Gm9575	0.6204	0.639
ENSMUSG00000040554	Aipl1	0.6203	0.72
ENSMUSG00000035878	Hykk	0.6203	0.169
ENSMUSG00000035829	Ppp1r26	0.62	0.109
ENSMUSG00000016918	Sulf1	0.6199	0.00244
ENSMUSG00000086638	4930405A21Rik	0.6197	0.6
ENSMUSG00000021534	1700001L19Rik	0.6185	0.823
ENSMUSG00000032607	Amt	0.6185	0.103
ENSMUSG00000010538	Tsacc	0.6184	0.431
ENSMUSG00000021057	Akap5	0.6183	0.544
ENSMUSG00000106795	RP24-150D8.2	0.6183	0.105
ENSMUSG00000024462	Gabbr1	0.6176	8.5e-08
ENSMUSG00000103309	BC037039	0.617	0.615
ENSMUSG00000081578	Gm12611	0.6164	0.722
ENSMUSG00000060128	Gm2710	0.616	0.789
ENSMUSG00000051890	Klhdc1	0.6158	0.0612
ENSMUSG00000003134	Tbc1d8	0.6156	0.251
ENSMUSG00000029185	Fam114a1	0.6142	1.01e-05
ENSMUSG00000028654	Mycl	0.614	0.481
ENSMUSG00000019737	Syne4	0.6126	0.457
ENSMUSG00000040345	Arhgap9	0.6125	0.463
ENSMUSG00000039623	Ap5z1	0.6124	4.34e-08
ENSMUSG00000024190	Dusp1	0.6123	1.46e-13
ENSMUSG00000036256	Igfbp7	0.612	8.85e-07
ENSMUSG00000056271	Lman1l	0.6118	0.484
ENSMUSG00000022838	Eaf2	0.6107	0.613
ENSMUSG00000038637	Lrrc56	0.6107	0.294
ENSMUSG00000029442	Wdr66	0.6102	0.595
ENSMUSG00000107227	RP23-429E19.4	0.61	0.63
ENSMUSG00000105692	RP23-350K3.2	0.6088	0.000113
ENSMUSG00000028950	Tas1r1	0.6083	0.588
ENSMUSG00000050222	Il17d	0.6079	0.0833
ENSMUSG00000034800	Zfp661	0.6074	0.0126
ENSMUSG00000087400	Gm15270	0.6062	0.118
ENSMUSG00000019894	Slc6a15	0.6059	0.74
ENSMUSG00000029627	Zkscan14	0.6053	0.0193
ENSMUSG00000018166	Erbb3	0.6049	0.0356
ENSMUSG00000078350	Smim1	0.6038	0.169
ENSMUSG00000103973	BC055308	0.6035	0.848
ENSMUSG00000019194	Scn1b	0.6033	0.121
ENSMUSG00000040867	Begain	0.6033	0.688
ENSMUSG00000020432	Tcn2	0.6032	0.0145
ENSMUSG00000059498	Fcgr3	0.6031	0.495
ENSMUSG00000085566	A730017L22Rik	0.6024	0.021
ENSMUSG00000097042	Gm17491	0.6024	0.0817
ENSMUSG00000031951	Tmem231	0.6023	2.82e-05
ENSMUSG00000038264	Sema7a	0.6021	0.000805
ENSMUSG00000079137	Rpl27-ps1	0.6016	0.588
ENSMUSG00000078864	Gm14322	0.6002	0.182
ENSMUSG00000024451	Arap3	0.5997	0.834
ENSMUSG00000100621	Gm28374	0.5985	0.776
ENSMUSG00000090150	Acad11	0.5982	0.00112
ENSMUSG00000097402	Gm17399	0.5978	0.404
ENSMUSG00000024302	Dtna	0.5978	0.261
ENSMUSG00000086746	Gm15222	0.5975	0.566
ENSMUSG00000107741	RP23-200C3.7	0.5974	0.561
ENSMUSG00000035713	Usp35	0.597	0.0125
ENSMUSG00000020871	Dlx4	0.5969	0.25
ENSMUSG00000038569	Rad9b	0.5967	0.276
ENSMUSG00000023084	Lrrc71	0.5966	0.763
ENSMUSG00000105140	RP23-265F20.14	0.5963	0.297
ENSMUSG00000002279	Lmf1	0.5951	0.0323
ENSMUSG00000056054	S100a8	0.5948	0.844
ENSMUSG00000074284	Gm10658	0.5947	0.332
ENSMUSG00000030287	Itpr2	0.5943	0.199
ENSMUSG00000081219	Bambi-ps1	0.5941	0.707
ENSMUSG00000038020	Rapgefl1	0.5941	0.0101
ENSMUSG00000042106	Fam212a	0.5935	0.344
ENSMUSG00000084846	A730011C13Rik	0.5931	0.383
ENSMUSG00000052373	Mpp3	0.5929	0.726
ENSMUSG00000043870	Gm5809	0.5924	0.724
ENSMUSG00000085583	Gm15676	0.5922	0.284
ENSMUSG00000000876	Pxmp4	0.5913	0.000184
ENSMUSG00000024481	Lvrn	0.5906	0.607
ENSMUSG00000030699	Tbx6	0.5902	0.797
ENSMUSG00000102573	Gm7265	0.5902	0.72
ENSMUSG00000066894	Vsig10	0.5895	0.000184
ENSMUSG00000040441	Slc26a10	0.5874	0.759
ENSMUSG00000087484	2900089D17Rik	0.5867	0.17
ENSMUSG00000085347	Hk1os	0.5864	0.49
ENSMUSG00000100158	Gm28119	0.5859	0.545
ENSMUSG00000086522	Gm4473	0.5859	0.631
ENSMUSG00000080242	Gm15487	0.5847	0.63
ENSMUSG00000038781	Stap2	0.5845	0.621
ENSMUSG00000097303	3110083C13Rik	0.5843	0.411
ENSMUSG00000003032	Klf4	0.5843	0.00221
ENSMUSG00000097167	Gm16740	0.584	0.405
ENSMUSG00000061330	Gm11361	0.5838	0.481
ENSMUSG00000053040	Aph1c	0.5836	0.456
ENSMUSG00000053603	4930442H23Rik	0.583	0.501
ENSMUSG00000097703	Gm26623	0.5821	0.737
ENSMUSG00000103900	Gm37500	0.582	0.725
ENSMUSG00000024529	Lox	0.5814	1.46e-28
ENSMUSG00000027364	Usp50	0.5814	0.737
ENSMUSG00000057069	Ero1lb	0.5812	0.000448
ENSMUSG00000021256	Vash1	0.581	0.587
ENSMUSG00000003546	Klc4	0.581	0.00165
ENSMUSG00000028453	Fancg	0.5803	0.000687
ENSMUSG00000069893	9930111J21Rik1	0.5802	0.376
ENSMUSG00000032648	Pygm	0.5798	0.479
ENSMUSG00000025216	Lbx1	0.5797	0.718
ENSMUSG00000024769	Cdc42bpg	0.579	3.41e-05
ENSMUSG00000060244	Alyref2	0.5788	0.301
ENSMUSG00000086472	Gm16172	0.5779	0.591
ENSMUSG00000034947	Tmem106a	0.577	0.000143
ENSMUSG00000029755	Dlx5	0.577	0.709
ENSMUSG00000032514	Ttc21a	0.5768	0.757
ENSMUSG00000025815	Dhtkd1	0.5762	0.188
ENSMUSG00000037161	Mgarp	0.5761	0.635
ENSMUSG00000102780	Gm38253	0.5753	0.693
ENSMUSG00000075590	Nrbp2	0.5748	3.56e-05
ENSMUSG00000075273	Ttc30b	0.5748	0.157
ENSMUSG00000035279	Ssc5d	0.5746	0.18
ENSMUSG00000072494	Ppp1r3e	0.574	2.59e-05
ENSMUSG00000039621	Prex1	0.5737	0.767
ENSMUSG00000018126	Baiap2l2	0.5734	0.605
ENSMUSG00000103622	Gm38391	0.5734	0.48
ENSMUSG00000039328	Rnf122	0.5733	0.366
ENSMUSG00000024887	Asah2	0.5731	0.0109
ENSMUSG00000099858	Gm6652	0.5728	0.682
ENSMUSG00000027068	Dhrs9	0.5725	0.207
ENSMUSG00000093606	B130034C11Rik	0.5724	0.459
ENSMUSG00000010051	Hyal1	0.5722	0.548
ENSMUSG00000074217	2210011C24Rik	0.5721	0.285
ENSMUSG00000028337	Coro2a	0.5717	0.00293
ENSMUSG00000025507	Pidd1	0.5701	0.000241
ENSMUSG00000016995	Matn4	0.5698	0.762
ENSMUSG00000056687	Gm11696	0.5695	0.239
ENSMUSG00000053574	4930563E22Rik	0.5694	0.605
ENSMUSG00000032363	Adamts7	0.5693	0.0854
ENSMUSG00000028789	Azin2	0.5692	0.00298
ENSMUSG00000030083	Abtb1	0.5686	0.0111
ENSMUSG00000107216	RP23-353L10.2	0.5685	0.752
ENSMUSG00000018672	Copz2	0.5685	0.000431
ENSMUSG00000046610	Oacyl	0.5684	0.749
ENSMUSG00000037224	Zfyve28	0.5683	0.771
ENSMUSG00000052415	Tchh	0.5681	0.819
ENSMUSG00000078607	1810010H24Rik	0.5679	0.696
ENSMUSG00000023067	Cdkn1a	0.5675	1.43e-05
ENSMUSG00000030966	Trim21	0.5674	0.303
ENSMUSG00000015890	Amdhd1	0.5673	0.874
ENSMUSG00000082647	Gm14056	0.5673	0.398
ENSMUSG00000022894	Adamts5	0.567	5.05e-05
ENSMUSG00000035184	Fam124a	0.5667	0.249
ENSMUSG00000022223	Sdr39u1	0.5666	0.108
ENSMUSG00000026489	Adck3	0.5664	0.599
ENSMUSG00000079502	1700101E01Rik	0.5658	0.776
ENSMUSG00000062687	Cks1brt	0.5653	0.548
ENSMUSG00000079427	Mthfsl	0.5643	0.324
ENSMUSG00000051246	Msantd1	0.5642	0.746
ENSMUSG00000043811	Rtn4r	0.564	0.315
ENSMUSG00000079467	Gm14966	0.5639	0.595
ENSMUSG00000024228	Nudt12	0.5636	0.00546
ENSMUSG00000037826	Ppm1k	0.5636	0.173
ENSMUSG00000092071	A230065N10Rik	0.5634	0.78
ENSMUSG00000051074	4930579K19Rik	0.5626	0.722
ENSMUSG00000103509	Gm38372	0.5623	0.691
ENSMUSG00000045991	Onecut2	0.5616	0.565
ENSMUSG00000071192	Wfikkn1	0.5615	0.518
ENSMUSG00000037493	Cib2	0.5613	0.0213
ENSMUSG00000041073	Nacad	0.5611	0.285
ENSMUSG00000024871	Doc2g	0.5611	0.193
ENSMUSG00000027296	Itpka	0.5611	0.513
ENSMUSG00000044566	Cage1	0.5609	0.589
ENSMUSG00000038058	Nod1	0.5608	0.054
ENSMUSG00000024663	Rab3il1	0.5607	0.00294
ENSMUSG00000058656	Samd12	0.56	0.883
ENSMUSG00000067786	Nnat	0.5597	0.692
ENSMUSG00000074283	Zfp109	0.559	0.213
ENSMUSG00000039782	Cpeb2	0.5586	0.000268
ENSMUSG00000032446	Eomes	0.5582	0.394
ENSMUSG00000037788	Vopp1	0.5579	4.13e-09
ENSMUSG00000030380	Mzf1	0.5577	0.381
ENSMUSG00000029456	Acad10	0.5577	0.251
ENSMUSG00000095789	Nupr1l	0.5575	0.848
ENSMUSG00000051498	Tlr6	0.5575	0.304
ENSMUSG00000051703	Tmem198	0.5569	0.234
ENSMUSG00000036995	Asap3	0.5568	0.0751
ENSMUSG00000000690	Hoxb6	0.5566	0.276
ENSMUSG00000017314	Mpp2	0.5559	0.00031
ENSMUSG00000071637	Cebpd	0.5556	0.000475
ENSMUSG00000022639	5330426P16Rik	0.5556	0.000983
ENSMUSG00000019320	Noxo1	0.5547	0.599
ENSMUSG00000026821	Ralgds	0.5543	0.019
ENSMUSG00000081308	Gm14480	0.5543	0.753
ENSMUSG00000070780	Rbm47	0.5542	0.0778
ENSMUSG00000097061	9330151L19Rik	0.5537	0.124
ENSMUSG00000070709	1700049G17Rik	0.5531	0.194
ENSMUSG00000087380	2210408F21Rik	0.553	0.583
ENSMUSG00000043773	1700048O20Rik	0.5522	0.0822
ENSMUSG00000074384	AI429214	0.5522	0.267
ENSMUSG00000052724	Gm9888	0.5522	0.751
ENSMUSG00000090273	Prr22	0.5521	0.314
ENSMUSG00000030772	Dkk3	0.5517	0.78
ENSMUSG00000104548	RP24-511F2.4	0.5515	0.524
ENSMUSG00000032238	Rora	0.5512	0.143
ENSMUSG00000105135	RP23-418O21.3	0.5501	0.523
ENSMUSG00000086859	Snhg20	0.55	9.28e-05
ENSMUSG00000020381	3010026O09Rik	0.55	0.133
ENSMUSG00000023266	Frs3	0.5496	0.124
ENSMUSG00000026940	Ccdc183	0.5482	0.434
ENSMUSG00000069633	Pex11g	0.5468	0.337
ENSMUSG00000062083	Rpl13a-ps1	0.5466	0.736
ENSMUSG00000107591	RP23-252F4.4	0.5458	0.626
ENSMUSG00000048772	Tmem53	0.5454	0.285
ENSMUSG00000098100	Gm7572	0.5452	0.789
ENSMUSG00000033233	Trim45	0.545	0.00232
ENSMUSG00000066800	Rnasel	0.5448	0.807
ENSMUSG00000053821	Gm9922	0.5446	0.7
ENSMUSG00000095930	Nim1k	0.5441	0.071
ENSMUSG00000018470	Kcnab3	0.5439	0.00455
ENSMUSG00000038086	Hspb2	0.5439	0.593
ENSMUSG00000040424	Hipk4	0.5438	0.282
ENSMUSG00000085767	Gm13563	0.5423	0.282
ENSMUSG00000033594	Spata2l	0.5419	0.0588
ENSMUSG00000106978	N4bp2os	0.5416	0.18
ENSMUSG00000097876	Gm16892	0.5415	0.754
ENSMUSG00000062470	Fbxl12os	0.5413	0.575
ENSMUSG00000051034	Zfp11	0.5413	0.00536
ENSMUSG00000014158	Trpv4	0.541	8.28e-11
ENSMUSG00000044968	Napepld	0.5408	0.0734
ENSMUSG00000051550	Zfp579	0.5406	2.37e-05
ENSMUSG00000105201	RP24-68G17.3	0.5405	0.516
ENSMUSG00000029408	Abcb9	0.5401	0.626
ENSMUSG00000078878	Gm14305	0.54	0.153
ENSMUSG00000034771	Tle2	0.5399	0.022
ENSMUSG00000004952	Rasa4	0.5396	0.00636
ENSMUSG00000053334	Ficd	0.5376	0.0286
ENSMUSG00000102426	Kantr	0.5375	0.0636
ENSMUSG00000087138	Gm15545	0.5374	0.307
ENSMUSG00000045345	9530056K15Rik	0.5373	0.522
ENSMUSG00000103041	Gm37305	0.5369	0.044
ENSMUSG00000041263	Rusc1	0.5363	0.000379
ENSMUSG00000035545	Leng8	0.5361	0.00697
ENSMUSG00000002550	Uck1	0.536	6.72e-10
ENSMUSG00000025650	Col7a1	0.5353	0.00536
ENSMUSG00000074657	Kif5a	0.5352	0.272
ENSMUSG00000039376	Synpo2l	0.5351	0.316
ENSMUSG00000074151	Nlrc5	0.535	0.671
ENSMUSG00000006241	Ccdc159	0.535	0.295
ENSMUSG00000025348	Itga7	0.5348	0.00873
ENSMUSG00000095362	Gm14325	0.5346	0.0999
ENSMUSG00000034792	Gna15	0.5345	0.857
ENSMUSG00000066838	Zfp772	0.5345	0.0233
ENSMUSG00000071573	Rnls	0.5344	0.389
ENSMUSG00000085741	5430405H02Rik	0.5343	0.375
ENSMUSG00000107709	RP23-20L3.2	0.5339	0.745
ENSMUSG00000093672	Gm20655	0.5339	0.536
ENSMUSG00000028125	Abca4	0.5336	0.733
ENSMUSG00000102038	Gm12345	0.5333	0.77
ENSMUSG00000047123	Ticam1	0.5332	4.51e-05
ENSMUSG00000086158	Ccpg1os	0.533	0.369
ENSMUSG00000005949	Ctns	0.533	2.23e-09
ENSMUSG00000046417	Lrrc75a	0.5323	0.0119
ENSMUSG00000029060	Mib2	0.5321	0.000362
ENSMUSG00000087120	Gm12279	0.5319	0.849
ENSMUSG00000063296	Tmem117	0.5313	0.78
ENSMUSG00000049038	Mterf2	0.5309	0.00611
ENSMUSG00000048310	Pskh1	0.5308	2.73e-08
ENSMUSG00000097328	Tnfsf12	0.5302	0.000523
ENSMUSG00000023284	Zfp605	0.5299	0.514
ENSMUSG00000033355	Rtp4	0.5298	0.296
ENSMUSG00000037411	Serpine1	0.5295	3.64e-13
ENSMUSG00000064349	mt-Tc	0.5294	0.57
ENSMUSG00000096957	E230013L22Rik	0.5293	0.658
ENSMUSG00000037661	Gpr160	0.5291	0.851
ENSMUSG00000083863	Gm13341	0.529	0.215
ENSMUSG00000027603	Ggt7	0.5289	0.0145
ENSMUSG00000021271	Zfp839	0.5287	0.0133
ENSMUSG00000010067	Rassf1	0.5282	2.01e-07
ENSMUSG00000071658	Gng3	0.5267	0.601
ENSMUSG00000055809	Dnaaf3	0.5262	0.54
ENSMUSG00000037752	Xkr8	0.5262	0.000184
ENSMUSG00000038515	Grtp1	0.5257	0.0607
ENSMUSG00000026222	Sp100	0.5254	0.87
ENSMUSG00000074357	AA386476	0.525	0.66
ENSMUSG00000045679	Pqlc3	0.5249	3.34e-05
ENSMUSG00000062646	Ganc	0.5248	0.00158
ENSMUSG00000035969	Rusc2	0.5248	4.8e-11
ENSMUSG00000087443	Ppp1r18os	0.5248	0.629
ENSMUSG00000043340	6530409C15Rik	0.5242	0.681
ENSMUSG00000006360	Crip1	0.5241	0.0119
ENSMUSG00000056569	Mpz	0.5239	0.676
ENSMUSG00000087305	A430035B10Rik	0.5232	0.741
ENSMUSG00000051037	Zfp455	0.5232	0.472
ENSMUSG00000104231	Gm37592	0.5232	0.83
ENSMUSG00000023186	Vwa5a	0.5227	0.0338
ENSMUSG00000031072	Oraov1	0.5226	0.0001
ENSMUSG00000067424	Zfp563	0.5224	0.261
ENSMUSG00000018740	Slc25a35	0.5222	0.0916
ENSMUSG00000060301	2610008E11Rik	0.5213	0.008
ENSMUSG00000057219	Armc7	0.5205	0.0106
ENSMUSG00000024948	Map4k2	0.5199	3.32e-09
ENSMUSG00000037438	Gm9763	0.5199	0.398
ENSMUSG00000039347	Atp6v0e2	0.5197	0.0778
ENSMUSG00000050545	Fam228b	0.5196	0.7
ENSMUSG00000086851	A430108G06Rik	0.5193	0.718
ENSMUSG00000036862	Dchs1	0.519	0.871
ENSMUSG00000031066	Usp11	0.5184	0.00844
ENSMUSG00000020892	Aloxe3	0.5182	0.378
ENSMUSG00000052125	F730043M19Rik	0.5182	0.0272
ENSMUSG00000099088	Gm27920	0.5182	0.534
ENSMUSG00000006281	Tep1	0.5175	0.00184
ENSMUSG00000020263	Appl2	0.5174	0.000101
ENSMUSG00000087368	BC065397	0.5171	0.272
ENSMUSG00000038271	Iffo1	0.517	0.000175
ENSMUSG00000068747	Sort1	0.517	0.000133
ENSMUSG00000023961	Enpp4	0.5165	0.000244
ENSMUSG00000064141	Zfp69	0.5165	0.502
ENSMUSG00000040033	Stat2	0.5164	0.00065
ENSMUSG00000024642	Tle4	0.5163	0.0208
ENSMUSG00000031434	Morc4	0.5157	0.121
ENSMUSG00000097336	Fendrr	0.5156	0.484
ENSMUSG00000082860	Gm13204	0.5152	0.31
ENSMUSG00000031574	Star	0.5151	0.222
ENSMUSG00000033022	Cdo1	0.5142	0.00286
ENSMUSG00000049411	Tmem241	0.514	0.0717
ENSMUSG00000107096	RP23-34P11.2	0.514	0.325
ENSMUSG00000082286	Pisd-ps1	0.5136	0.0762
ENSMUSG00000020388	Pdlim4	0.5132	0.653
ENSMUSG00000023034	Nr4a1	0.5125	0.29
ENSMUSG00000035640	Cbarp	0.5125	0.000557
ENSMUSG00000107278	RP24-478I22.8	0.5116	0.787
ENSMUSG00000027495	Fam210b	0.5114	0.000466
ENSMUSG00000037868	Egr2	0.5109	0.263
ENSMUSG00000046854	Pip5kl1	0.5104	0.699
ENSMUSG00000028871	Rspo1	0.5103	0.579
ENSMUSG00000104168	Gm38250	0.5101	0.748
ENSMUSG00000022199	Slc22a17	0.5099	0.846
ENSMUSG00000071103	1700029J07Rik	0.5095	0.513
ENSMUSG00000090659	Zfp493	0.5095	0.16
ENSMUSG00000066235	Pomgnt2	0.5094	0.00881
ENSMUSG00000082674	Gm11914	0.5094	0.727
ENSMUSG00000095990	Zfp97	0.5092	0.358
ENSMUSG00000090075	Gm16251	0.5088	0.831
ENSMUSG00000054304	D130007C19Rik	0.5087	0.706
ENSMUSG00000025008	Tctn3	0.5084	7.07e-05
ENSMUSG00000022221	Ripk3	0.5083	0.683
ENSMUSG00000086043	Gm12473	0.5082	0.528
ENSMUSG00000090861	Arf4os	0.5076	0.688
ENSMUSG00000057103	Cml1	0.5075	0.622
ENSMUSG00000059776	Gm10071	0.5074	0.788
ENSMUSG00000102461	Gm37166	0.5068	0.731
ENSMUSG00000044730	9930104L06Rik	0.5068	3.35e-06
ENSMUSG00000040035	Disp2	0.5062	0.839
ENSMUSG00000018820	Zfyve27	0.5061	8.94e-09
ENSMUSG00000033624	Pdpr	0.506	1.34e-05
ENSMUSG00000055897	Ppp4r1l-ps	0.5059	0.00457
ENSMUSG00000091154	Proscos	0.5058	0.708
ENSMUSG00000030730	Atp2a1	0.5057	0.82
ENSMUSG00000034163	Zfc3h1	0.5057	7.65e-07
ENSMUSG00000012123	Aim1l	0.5054	0.847
ENSMUSG00000078870	Gm14410	0.5052	0.142
ENSMUSG00000002908	Kcnn1	0.5051	0.186
ENSMUSG00000028795	Ccdc28b	0.5051	0.186
ENSMUSG00000108181	RP23-370A2.5	0.505	0.438
ENSMUSG00000036622	Atp13a2	0.5047	4.9e-06
ENSMUSG00000081975	Gm12482	0.5047	0.677
ENSMUSG00000029859	Epha1	0.5044	0.655
ENSMUSG00000053192	Mllt11	0.5042	1.23e-06
ENSMUSG00000104777	RP23-256A5.2	0.5042	0.658
ENSMUSG00000063594	Gng8	0.5039	0.44
ENSMUSG00000084904	Gm14827	0.503	0.77
ENSMUSG00000032085	Tagln	0.5027	2.88e-06
ENSMUSG00000061531	Tmem236	0.5025	0.844
ENSMUSG00000011589	Fsd1	0.5025	0.0751
ENSMUSG00000102805	Gm37240	0.5018	0.839
ENSMUSG00000029206	Nsun7	0.5014	0.766
ENSMUSG00000101077	Gm29164	0.5014	0.775
ENSMUSG00000040557	Wbscr27	0.5013	0.0623
ENSMUSG00000071001	Hrct1	0.5013	0.569
ENSMUSG00000085287	4833418N02Rik	0.5011	0.53
ENSMUSG00000068205	Macrod2	0.5011	0.137
ENSMUSG00000024130	Abca3	0.501	5.58e-05
ENSMUSG00000032725	Folr2	0.5008	0.793
ENSMUSG00000032579	Hemk1	0.5003	0.07
ENSMUSG00000101599	Gm20342	0.5	0.438
ENSMUSG00000027239	Mdk	0.4998	0.632
ENSMUSG00000085169	Gm10785	0.4996	0.512
ENSMUSG00000021567	Nkd2	0.4996	0.661
ENSMUSG00000036687	Tmem184a	0.4993	0.221
ENSMUSG00000097990	Gm19557	0.4993	0.557
ENSMUSG00000028469	Npr2	0.4992	0.00252
ENSMUSG00000102278	Gm37145	0.499	0.389
ENSMUSG00000083512	Gm12749	0.4989	0.753
ENSMUSG00000042066	Tmcc2	0.4981	2.83e-07
ENSMUSG00000044068	Zrsr1	0.4981	0.00244
ENSMUSG00000084911	Gm16185	0.4981	0.486
ENSMUSG00000000869	Il4	0.4978	0.709
ENSMUSG00000024521	Pmaip1	0.4976	0.0115
ENSMUSG00000084799	Ino80dos	0.4975	0.29
ENSMUSG00000023979	Guca1b	0.4974	0.596
ENSMUSG00000036098	Myrf	0.4971	0.29
ENSMUSG00000039770	Ypel5	0.4969	0.000427
ENSMUSG00000038146	Notch3	0.4967	0.237
ENSMUSG00000100813	Gm28874	0.4966	0.879
ENSMUSG00000041187	Prkd2	0.4959	0.000103
ENSMUSG00000097375	6720427I07Rik	0.4959	0.1
ENSMUSG00000034706	Dnaic2	0.4955	0.581
ENSMUSG00000037703	Lzts3	0.4955	1.96e-11
ENSMUSG00000031220	Awat2	0.4952	0.751
ENSMUSG00000026203	Dnajb2	0.4952	2.7e-07
ENSMUSG00000022515	Anks3	0.4945	1.96e-05
ENSMUSG00000037447	Arid5a	0.4935	1.73e-05
ENSMUSG00000005950	P2rx5	0.4929	0.228
ENSMUSG00000063145	Bbs5	0.4926	0.0146
ENSMUSG00000038181	Chpf2	0.4923	6.55e-07
ENSMUSG00000032652	Crebl2	0.4921	0.0189
ENSMUSG00000005705	Agrp	0.4919	0.85
ENSMUSG00000026321	Tnfrsf11a	0.4915	0.354
ENSMUSG00000020364	Zfp354a	0.4914	0.0282
ENSMUSG00000003420	Fcgrt	0.4913	0.0171
ENSMUSG00000066170	E230001N04Rik	0.4912	0.738
ENSMUSG00000053390	Zfp952	0.4912	0.0107
ENSMUSG00000024866	Acy3	0.4911	0.0737
ENSMUSG00000028392	Bspry	0.4909	0.883
ENSMUSG00000097296	Gm26532	0.4908	0.0568
ENSMUSG00000082711	Gm12987	0.4908	0.744
ENSMUSG00000043782	Ccdc64b	0.4904	0.651
ENSMUSG00000024777	Ppp2r5b	0.4904	2.03e-12
ENSMUSG00000072972	Adam4	0.49	0.761
ENSMUSG00000035104	Eva1a	0.4897	0.478
ENSMUSG00000014470	Rnf166	0.4893	1.15e-05
ENSMUSG00000054509	Parp4	0.4886	0.000264
ENSMUSG00000042349	Ikbke	0.4886	0.00155
ENSMUSG00000035245	Eogt	0.4876	1.27e-07
ENSMUSG00000052688	Rab7b	0.4874	0.574
ENSMUSG00000081402	Gm15455	0.4873	0.702
ENSMUSG00000042616	Oscp1	0.487	0.0108
ENSMUSG00000038180	Spag4	0.4868	0.0513
ENSMUSG00000074121	Ntf5	0.4867	0.346
ENSMUSG00000022594	Lynx1	0.4858	0.00341
ENSMUSG00000087611	4930458D05Rik	0.4853	0.642
ENSMUSG00000079608	Stard6	0.4852	0.589
ENSMUSG00000047996	Prrg1	0.4852	0.0816
ENSMUSG00000038352	Arl5c	0.4846	0.615
ENSMUSG00000026941	Mamdc4	0.4842	0.188
ENSMUSG00000032702	Kank1	0.4841	0.00418
ENSMUSG00000037306	Man1c1	0.4834	0.0305
ENSMUSG00000060467	Gm10080	0.4831	0.524
ENSMUSG00000100826	Snhg14	0.4829	0.541
ENSMUSG00000083864	Gm13719	0.4828	0.727
ENSMUSG00000082458	Gm9430	0.4821	0.858
ENSMUSG00000103711	Tstd1	0.4818	0.598
ENSMUSG00000086681	Gm16178	0.4814	0.818
ENSMUSG00000021496	Pcbd2	0.4812	0.00411
ENSMUSG00000083836	Ldha-ps2	0.4812	0.829
ENSMUSG00000062044	Lmtk3	0.481	0.0865
ENSMUSG00000021913	Ogdhl	0.4806	0.00231
ENSMUSG00000018931	Natd1	0.4806	1.69e-05
ENSMUSG00000022583	Ly6f	0.48	0.769
ENSMUSG00000030089	Slc41a3	0.4791	0.126
ENSMUSG00000095041	PISD	0.4791	0.0104
ENSMUSG00000020948	Klhl28	0.479	0.138
ENSMUSG00000033713	Foxn3	0.4788	0.0282
ENSMUSG00000034758	Tle6	0.4788	0.0208
ENSMUSG00000028132	Tmem56	0.4787	0.82
ENSMUSG00000006403	Adamts4	0.4782	0.0584
ENSMUSG00000031145	Prickle3	0.4782	0.605
ENSMUSG00000104546	RP24-511F2.3	0.4782	0.651
ENSMUSG00000088088	Rmrp	0.4782	0.74
ENSMUSG00000097537	2610020C07Rik	0.478	0.136
ENSMUSG00000024186	Rgs11	0.4777	0.823
ENSMUSG00000026031	Cflar	0.4776	9.41e-08
ENSMUSG00000032641	Gpr19	0.4775	0.0716
ENSMUSG00000047181	Samd14	0.4773	7.65e-07
ENSMUSG00000033721	Vav3	0.4773	0.246
ENSMUSG00000097572	Gm26797	0.4768	0.697
ENSMUSG00000022386	Trmu	0.4767	0.00221
ENSMUSG00000096965	3300005D01Rik	0.4764	0.388
ENSMUSG00000025161	Slc16a3	0.4763	0.0247
ENSMUSG00000022096	Hr	0.476	0.00368
ENSMUSG00000032392	Parp16	0.4755	0.0886
ENSMUSG00000033703	Fuk	0.4755	0.000245
ENSMUSG00000039601	Rcan2	0.4752	0.276
ENSMUSG00000048106	4632415L05Rik	0.4751	0.00221
ENSMUSG00000101586	Gm29017	0.475	0.744
ENSMUSG00000097889	Gm26541	0.4749	0.546
ENSMUSG00000057054	Inca1	0.4747	0.593
ENSMUSG00000054136	Adm2	0.4747	0.82
ENSMUSG00000001988	Npas1	0.4747	0.671
ENSMUSG00000010609	Psen2	0.4745	0.0584
ENSMUSG00000035944	Ttc38	0.4741	0.652
ENSMUSG00000043541	Casc1	0.4741	0.776
ENSMUSG00000014245	Pigl	0.474	0.00276
ENSMUSG00000083780	Gm12728	0.4738	0.82
ENSMUSG00000049515	Espnl	0.4733	0.51
ENSMUSG00000000532	Acvr1b	0.4732	0.00184
ENSMUSG00000022687	Boc	0.4732	0.144
ENSMUSG00000070315	4930581F22Rik	0.4731	0.274
ENSMUSG00000021094	Dhrs7	0.4731	0.00949
ENSMUSG00000037363	Letm2	0.473	0.373
ENSMUSG00000105345	RP23-301L9.3	0.473	0.347
ENSMUSG00000020234	4930404N11Rik	0.473	0.734
ENSMUSG00000030187	Klra2	0.4729	0.849
ENSMUSG00000042613	Pbxip1	0.4729	2.08e-08
ENSMUSG00000051483	Cbr1	0.4726	0.148
ENSMUSG00000097347	Gm17275	0.4725	0.478
ENSMUSG00000058046	4933430I17Rik	0.4723	0.795
ENSMUSG00000024922	Ovol1	0.4718	0.744
ENSMUSG00000103445	Gm36948	0.4716	0.683
ENSMUSG00000024910	Ctsw	0.4713	0.0541
ENSMUSG00000056596	Trnp1	0.4713	1.21e-05
ENSMUSG00000050762	Prss27	0.4712	0.818
ENSMUSG00000020785	Camkk1	0.4712	0.00518
ENSMUSG00000042340	Ctf1	0.4707	0.0202
ENSMUSG00000022575	Gsdmd	0.4706	0.853
ENSMUSG00000103674	Gm37699	0.4704	0.771
ENSMUSG00000067916	Gm13139	0.47	0.662
ENSMUSG00000020455	Trim11	0.47	8.83e-05
ENSMUSG00000036545	Adamts2	0.4699	0.00128
ENSMUSG00000092344	Hspe1-ps3	0.4695	0.618
ENSMUSG00000010660	Plcd1	0.4693	0.00263
ENSMUSG00000014704	Hoxa2	0.4692	0.718
ENSMUSG00000085286	Ube4bos3	0.4689	0.778
ENSMUSG00000047067	Dusp28	0.4687	0.209
ENSMUSG00000029470	P2rx4	0.4685	3.89e-07
ENSMUSG00000049624	Slc17a5	0.4683	0.025
ENSMUSG00000047759	Hs3st3a1	0.4683	0.016
ENSMUSG00000079242	C730034F03Rik	0.4677	0.722
ENSMUSG00000079511	Ccdc142	0.4674	0.588
ENSMUSG00000107200	RP23-442L7.3	0.4669	0.73
ENSMUSG00000074282	Zfp94	0.4666	0.0582
ENSMUSG00000035373	Ccl7	0.4662	0.423
ENSMUSG00000006463	Zdhhc24	0.4659	0.0118
ENSMUSG00000002799	Jag2	0.4658	0.00865
ENSMUSG00000020950	Foxg1	0.4653	0.41
ENSMUSG00000027834	Serpini1	0.4651	0.235
ENSMUSG00000024965	Fermt3	0.465	0.458
ENSMUSG00000064339	mt-Rnr2	0.4649	0.178
ENSMUSG00000079057	Cyp4v3	0.4648	0.276
ENSMUSG00000022102	Dok2	0.4639	0.818
ENSMUSG00000015659	Serac1	0.4637	0.00751
ENSMUSG00000038244	Mical2	0.4635	1.27e-06
ENSMUSG00000073434	Wdr90	0.4633	8.05e-07
ENSMUSG00000023191	P3h3	0.4633	0.00165
ENSMUSG00000070527	Mkrn3	0.4633	0.571
ENSMUSG00000055707	Klhl26	0.4632	0.000157
ENSMUSG00000097748	Gm26533	0.4632	0.849
ENSMUSG00000090115	Usp49	0.4632	0.00108
ENSMUSG00000081944	Gm12276	0.4631	0.78
ENSMUSG00000056592	Zfp658	0.463	0.152
ENSMUSG00000098559	Gm15013	0.4628	0.754
ENSMUSG00000064307	Lrrc51	0.4626	0.394
ENSMUSG00000005986	Ankrd13d	0.4623	0.0361
ENSMUSG00000102813	Gm37795	0.4622	0.49
ENSMUSG00000031673	Cdh11	0.4621	0.69
ENSMUSG00000097265	Gm26803	0.462	0.87
ENSMUSG00000082279	Gm12870	0.462	0.74
ENSMUSG00000034563	Ccpg1	0.4619	0.592
ENSMUSG00000037649	H2-DMa	0.4618	0.676
ENSMUSG00000022946	Dopey2	0.4618	0.00642
ENSMUSG00000085894	Gm15832	0.4618	0.626
ENSMUSG00000054893	Zfp667	0.4614	0.166
ENSMUSG00000091898	Tnnc1	0.4611	0.53
ENSMUSG00000025854	Fam20c	0.4608	6.08e-07
ENSMUSG00000090110	Cmc4	0.4603	0.286
ENSMUSG00000097868	A330069E16Rik	0.4599	0.491
ENSMUSG00000067825	Pex26	0.4599	0.0038
ENSMUSG00000038534	Osbpl7	0.4598	0.00312
ENSMUSG00000046879	Irgm1	0.4595	3.12e-05
ENSMUSG00000044024	Rell2	0.4592	0.346
ENSMUSG00000032186	Tmod2	0.459	0.0517
ENSMUSG00000071847	Apcdd1	0.459	0.0547
ENSMUSG00000086816	Gm16726	0.4588	0.728
ENSMUSG00000097131	D230017M19Rik	0.4587	0.587
ENSMUSG00000031532	Saraf	0.4587	1.15e-08
ENSMUSG00000021699	Pde4d	0.4584	0.0174
ENSMUSG00000057948	Unc13d	0.4577	0.388
ENSMUSG00000066892	Fbxl12	0.4576	0.00463
ENSMUSG00000021241	Isca2	0.4575	6.21e-05
ENSMUSG00000048261	Gm4879	0.4572	0.702
ENSMUSG00000107331	RP23-153H17.5	0.457	0.572
ENSMUSG00000079037	Prnp	0.4565	1e-14
ENSMUSG00000097487	Ptges3l	0.4564	0.439
ENSMUSG00000027082	Tfpi	0.4562	0.1
ENSMUSG00000026311	Asb1	0.4562	5.71e-06
ENSMUSG00000033152	Podxl2	0.4561	0.376
ENSMUSG00000037887	Dusp8	0.4558	5.73e-07
ENSMUSG00000041361	Myzap	0.4557	0.859
ENSMUSG00000010453	Kansl3	0.4551	2.02e-08
ENSMUSG00000042320	Prox2	0.455	0.536
ENSMUSG00000097842	9330104G04Rik	0.455	0.767
ENSMUSG00000030134	Rasgef1a	0.4542	0.687
ENSMUSG00000054555	Adam12	0.4542	0.0568
ENSMUSG00000042759	Apobr	0.454	0.0638
ENSMUSG00000059142	Zfp945	0.4537	0.0409
ENSMUSG00000056300	Gm13247	0.4537	0.798
ENSMUSG00000032656	March3	0.4533	0.266
ENSMUSG00000038930	Rccd1	0.453	0.0174
ENSMUSG00000067818	Myl9	0.4529	0.00187
ENSMUSG00000021611	Tert	0.4524	0.291
ENSMUSG00000002057	Foxn1	0.4522	0.382
ENSMUSG00000041920	Slc16a6	0.4514	0.603
ENSMUSG00000001333	Sync	0.4511	0.351
ENSMUSG00000029027	Dffb	0.4511	0.0476
ENSMUSG00000106717	RP24-86I23.4	0.4509	0.812
ENSMUSG00000059708	Akap17b	0.4508	0.361
ENSMUSG00000032202	Rab27a	0.4497	0.623
ENSMUSG00000107868	RP23-46L17.6	0.4496	0.443
ENSMUSG00000015094	Npdc1	0.4491	6.15e-07
ENSMUSG00000081244	Gm13529	0.4485	0.763
ENSMUSG00000029769	Ccdc136	0.4484	0.00303
ENSMUSG00000102752	Gm7694	0.4483	0.521
ENSMUSG00000098269	Mir8094	0.4479	0.832
ENSMUSG00000050240	Hic2	0.4477	0.202
ENSMUSG00000027329	Spef1	0.4477	0.182
ENSMUSG00000054474	Thnsl2	0.4475	0.868
ENSMUSG00000041528	Rnf123	0.4473	5.55e-06
ENSMUSG00000086718	Gm16069	0.4459	0.472
ENSMUSG00000028466	Creb3	0.4455	3.76e-08
ENSMUSG00000053181	A830005F24Rik	0.4453	0.759
ENSMUSG00000070867	Trabd2b	0.4452	0.489
ENSMUSG00000000753	Serpinf1	0.4452	0.368
ENSMUSG00000087403	Kantr	0.4449	0.388
ENSMUSG00000068246	Apol9b	0.4449	0.384
ENSMUSG00000045409	Trim39	0.4447	5.07e-06
ENSMUSG00000035262	Amh	0.4446	0.586
ENSMUSG00000023707	Ogfod2	0.4442	0.00376
ENSMUSG00000042628	Zfyve1	0.4439	0.000103
ENSMUSG00000062300	Pvrl2	0.4436	4.52e-06
ENSMUSG00000066647	Gm5113	0.4436	0.232
ENSMUSG00000097737	Gm26530	0.4434	0.391
ENSMUSG00000033227	Wnt6	0.4434	0.437
ENSMUSG00000074884	Serf2	0.4432	1.06e-07
ENSMUSG00000026589	Sec16b	0.4431	0.829
ENSMUSG00000014361	Mertk	0.443	0.753
ENSMUSG00000003581	Rnf215	0.4429	0.000265
ENSMUSG00000059851	Suv420h2	0.4429	0.00119
ENSMUSG00000098066	Gm26944	0.4427	0.786
ENSMUSG00000052911	Lamb2	0.4426	2.81e-06
ENSMUSG00000057337	Chst3	0.4425	0.149
ENSMUSG00000051851	Cxx1c	0.4424	0.781
ENSMUSG00000037847	Nmrk1	0.4422	0.0217
ENSMUSG00000098190	Gm5210	0.4422	0.844
ENSMUSG00000097908	4933404O12Rik	0.4419	0.132
ENSMUSG00000024524	Gnal	0.4419	0.395
ENSMUSG00000038524	Fchsd1	0.4417	0.0198
ENSMUSG00000083718	Ccnb2-ps	0.4414	0.85
ENSMUSG00000027438	Napb	0.441	0.0697
ENSMUSG00000029311	Hsd17b11	0.4403	0.114
ENSMUSG00000096780	Tmem181b-ps	0.4399	0.28
ENSMUSG00000000686	Abhd15	0.4398	0.623
ENSMUSG00000001661	Hoxc6	0.4394	0.795
ENSMUSG00000064215	Ifi27	0.4393	0.0203
ENSMUSG00000005980	Dnase1	0.4393	0.246
ENSMUSG00000038539	Atf5	0.4393	2.62e-08
ENSMUSG00000081285	Gm18859	0.4393	0.731
ENSMUSG00000103473	Gm37696	0.439	0.821
ENSMUSG00000091900	Gm4353	0.439	0.587
ENSMUSG00000073002	Vamp5	0.4389	0.112
ENSMUSG00000084403	Rps15a-ps8	0.4388	0.545
ENSMUSG00000019845	Tube1	0.4383	0.00962
ENSMUSG00000021403	Serpinb9b	0.4377	0.137
ENSMUSG00000040350	Trim7	0.4375	0.421
ENSMUSG00000032285	Dnaja4	0.4375	0.0323
ENSMUSG00000044948	Cfap43	0.4373	1.95e-06
ENSMUSG00000028391	Wdr31	0.4373	0.164
ENSMUSG00000084780	Gm15350	0.4372	0.685
ENSMUSG00000035042	Ccl5	0.4371	0.484
ENSMUSG00000097665	Gm16853	0.437	0.829
ENSMUSG00000025357	Dgka	0.4369	0.00436
ENSMUSG00000025484	Bet1l	0.4367	0.00452
ENSMUSG00000048200	Cracr2b	0.4364	0.507
ENSMUSG00000028773	Fabp3	0.4362	0.839
ENSMUSG00000065037	Rn7sk	0.4361	0.564
ENSMUSG00000074754	Gm561	0.4359	0.00588
ENSMUSG00000042677	Zc3h12a	0.4355	0.0356
ENSMUSG00000062365	Gm4968	0.4346	0.629
ENSMUSG00000002847	Pla1a	0.4344	0.705
ENSMUSG00000040562	Gstm2	0.4344	0.168
ENSMUSG00000102602	A930004J17Rik	0.4337	0.306
ENSMUSG00000049791	Fzd4	0.4336	0.0549
ENSMUSG00000103138	Gm2238	0.4334	0.84
ENSMUSG00000036036	Zfp57	0.4332	6.61e-06
ENSMUSG00000066175	2510046G10Rik	0.4331	0.605
ENSMUSG00000038776	Ephx1	0.4326	0.147
ENSMUSG00000004661	Arid3b	0.4325	0.134
ENSMUSG00000063087	Gm10125	0.4318	0.683
ENSMUSG00000105742	RP24-347B12.1	0.4316	0.839
ENSMUSG00000022768	Ccdc116	0.4314	0.8
ENSMUSG00000047180	Neurl3	0.4313	0.904
ENSMUSG00000035283	Adrb1	0.4313	0.313
ENSMUSG00000044807	Zfp354c	0.4313	0.00796
ENSMUSG00000046447	Camk2n1	0.4312	0.0632
ENSMUSG00000097345	AA543186	0.4311	0.81
ENSMUSG00000065637	Gm26397	0.4311	0.663
ENSMUSG00000021238	Aldh6a1	0.431	0.0801
ENSMUSG00000064366	mt-Tl2	0.431	0.92
ENSMUSG00000070570	Slc17a7	0.4302	0.444
ENSMUSG00000037818	3110057O12Rik	0.4301	0.25
ENSMUSG00000005917	Otx1	0.4301	0.00466
ENSMUSG00000015812	Gnrh1	0.43	0.696
ENSMUSG00000031639	Tlr3	0.4295	0.449
ENSMUSG00000038486	Sv2a	0.4292	0.407
ENSMUSG00000039942	Ptger4	0.4286	0.0695
ENSMUSG00000007038	Neu1	0.4283	2.22e-06
ENSMUSG00000031775	Pllp	0.4282	0.869
ENSMUSG00000029524	Sirt4	0.4278	0.0198
ENSMUSG00000041945	Mfsd9	0.4276	0.68
ENSMUSG00000057894	Zfp329	0.4273	0.0425
ENSMUSG00000107086	RP23-113M20.5	0.4273	0.58
ENSMUSG00000038010	Ccdc138	0.4272	0.184
ENSMUSG00000040859	Bsdc1	0.4269	5.82e-06
ENSMUSG00000082082	Gm13230	0.4263	0.627
ENSMUSG00000036466	Megf11	0.4262	0.812
ENSMUSG00000063714	Sp3os	0.4261	0.411
ENSMUSG00000031839	Hsbp1	0.4259	8.2e-10
ENSMUSG00000008450	Nutf2	0.4257	9.34e-06
ENSMUSG00000038375	Trp53inp2	0.4255	0.00104
ENSMUSG00000032609	Klhdc8b	0.4254	0.22
ENSMUSG00000039375	Wdr17	0.4251	0.52
ENSMUSG00000020668	Kif3c	0.4251	0.00263
ENSMUSG00000091735	Gpr62	0.425	0.612
ENSMUSG00000046516	Cox17	0.4247	0.000428
ENSMUSG00000032265	Fam46a	0.424	0.442
ENSMUSG00000101172	Gm28535	0.4239	0.899
ENSMUSG00000030630	Fah	0.4236	0.0149
ENSMUSG00000049295	Zfp219	0.4235	0.000532
ENSMUSG00000022479	Vdr	0.4234	0.705
ENSMUSG00000103821	D430013B06Rik	0.4233	0.834
ENSMUSG00000042097	Zfp239	0.4232	0.101
ENSMUSG00000008393	Carhsp1	0.4231	5.6e-12
ENSMUSG00000087433	Gm14167	0.4229	0.74
ENSMUSG00000099997	Tubb4b-ps2	0.4229	0.74
ENSMUSG00000024975	Pdcd4	0.4227	0.0285
ENSMUSG00000002325	Irf9	0.4226	0.00481
ENSMUSG00000086900	Kcnab3os	0.4225	0.843
ENSMUSG00000015312	Gadd45b	0.422	3.22e-06
ENSMUSG00000031808	Slc27a1	0.4214	0.00443
ENSMUSG00000028164	Manba	0.4213	0.115
ENSMUSG00000059327	Eda	0.4212	0.0303
ENSMUSG00000050410	Tcf19	0.421	1.47e-12
ENSMUSG00000097138	Gm26625	0.421	0.777
ENSMUSG00000105676	RP24-380C2.2	0.4207	0.859
ENSMUSG00000045071	E130308A19Rik	0.4201	0.0359
ENSMUSG00000000056	Narf	0.4197	3.56e-05
ENSMUSG00000077714	Snord17	0.4196	0.8
ENSMUSG00000007021	Syngr3	0.4192	0.000905
ENSMUSG00000085028	Slc2a4rg-ps	0.4191	0.129
ENSMUSG00000043822	Adamtsl5	0.419	1.58e-05
ENSMUSG00000066191	Anks6	0.419	0.133
ENSMUSG00000065147	Snora31	0.419	0.498
ENSMUSG00000036086	Zranb3	0.4186	0.0131
ENSMUSG00000036197	Gxylt1	0.4185	3.31e-07
ENSMUSG00000047084	Ngrn	0.4185	0.000323
ENSMUSG00000066621	Tecpr1	0.4183	1.14e-05
ENSMUSG00000045215	Asxl3	0.4183	0.876
ENSMUSG00000098789	Jmjd7	0.4182	0.595
ENSMUSG00000020461	Clhc1	0.418	0.799
ENSMUSG00000018750	Zbtb4	0.418	5.28e-06
ENSMUSG00000042737	Dpm3	0.4177	0.00209
ENSMUSG00000028943	Espn	0.4176	0.661
ENSMUSG00000056445	Hoxaas2	0.4172	0.768
ENSMUSG00000014776	Nol3	0.417	0.499
ENSMUSG00000044229	Nxpe4	0.4168	0.75
ENSMUSG00000078317	F8a	0.4168	0.485
ENSMUSG00000056671	Prelid2	0.4167	0.419
ENSMUSG00000024963	Dnajc4	0.4155	0.0101
ENSMUSG00000039461	Tcta	0.4154	0.0504
ENSMUSG00000023055	Calcoco1	0.4154	1.58e-06
ENSMUSG00000024854	Pold4	0.4153	0.00153
ENSMUSG00000062510	Nsl1	0.4153	0.000166
ENSMUSG00000097350	4732491K20Rik	0.415	0.377
ENSMUSG00000018405	Mrm1	0.4146	0.00357
ENSMUSG00000039943	Plcb4	0.4144	0.908
ENSMUSG00000082394	Gm4596	0.4144	0.758
ENSMUSG00000032177	Pde4a	0.4143	0.00177
ENSMUSG00000004951	Hspb1	0.4143	0.014
ENSMUSG00000097380	Gm26816	0.4143	0.631
ENSMUSG00000087060	Eldr	0.4137	0.0611
ENSMUSG00000043079	Synpo	0.4137	0.00796
ENSMUSG00000092260	Zfp963	0.4136	0.435
ENSMUSG00000054021	Sirt5	0.4135	0.117
ENSMUSG00000036661	Dennd3	0.413	0.355
ENSMUSG00000018983	E2f2	0.4127	0.0237
ENSMUSG00000043065	Spice1	0.4126	0.02
ENSMUSG00000022580	Rhpn1	0.4124	0.359
ENSMUSG00000021176	Efcab11	0.4123	0.276
ENSMUSG00000078994	Zfp429	0.4122	0.185
ENSMUSG00000040105	Ppapdc2	0.4122	0.0175
ENSMUSG00000097915	A330009N23Rik	0.4121	0.411
ENSMUSG00000044952	Kctd21	0.4118	0.174
ENSMUSG00000040415	Dtx3	0.4115	3.19e-05
ENSMUSG00000106205	RP23-326O2.2	0.4115	0.348
ENSMUSG00000062012	Zfp13	0.4114	0.344
ENSMUSG00000085185	BC028777	0.4113	0.851
ENSMUSG00000020023	Tmcc3	0.4108	0.00546
ENSMUSG00000046688	Tifa	0.41	0.0277
ENSMUSG00000106190	CAAA01154573.1	0.41	0.726
ENSMUSG00000057058	Skap1	0.4097	0.731
ENSMUSG00000013367	Iglon5	0.4091	0.342
ENSMUSG00000043015	Tmem194b	0.4087	0.0774
ENSMUSG00000092257	Gm2308	0.4087	0.725
ENSMUSG00000019989	Enpp3	0.4086	0.783
ENSMUSG00000035877	Zhx3	0.4086	0.0134
ENSMUSG00000021097	Clmn	0.4086	0.0109
ENSMUSG00000023235	Ccl25	0.4084	0.138
ENSMUSG00000004798	Ulk2	0.408	3.21e-05
ENSMUSG00000022211	Lrrc16b	0.4077	0.707
ENSMUSG00000020961	Ston2	0.4074	0.643
ENSMUSG00000072974	Gm4787	0.4072	0.807
ENSMUSG00000063687	Pcdhb5	0.4072	0.492
ENSMUSG00000030330	Ing4	0.407	0.587
ENSMUSG00000036845	Lin37	0.407	0.0569
ENSMUSG00000048895	Cdk5r1	0.407	0.119
ENSMUSG00000049604	Hoxb13	0.407	0.641
ENSMUSG00000034209	Rasl10a	0.4069	0.544
ENSMUSG00000047153	Khnyn	0.4069	0.00361
ENSMUSG00000085882	2610507I01Rik	0.4068	0.201
ENSMUSG00000038605	Samd10	0.4066	0.665
ENSMUSG00000037348	Paqr7	0.4066	0.103
ENSMUSG00000061461	Smim20	0.4065	0.112
ENSMUSG00000055240	Zfp101	0.4061	0.00657
ENSMUSG00000042622	Maff	0.406	4.94e-06
ENSMUSG00000027695	Pld1	0.4057	0.0276
ENSMUSG00000028251	Tstd3	0.4055	0.0132
ENSMUSG00000056476	Med12l	0.4053	0.711
ENSMUSG00000002409	Dyrk1b	0.4053	0.0558
ENSMUSG00000104843	RP23-255N3.3	0.4051	0.849
ENSMUSG00000086392	Mccc1os	0.4049	0.867
ENSMUSG00000031387	Renbp	0.4049	0.0823
ENSMUSG00000037708	Spag6l	0.4049	0.862
ENSMUSG00000020894	Vamp2	0.4049	5.76e-06
ENSMUSG00000097993	Ptprv	0.4047	0.772
ENSMUSG00000049092	Gpr137c	0.4047	0.837
ENSMUSG00000020451	Limk2	0.4046	2.29e-06
ENSMUSG00000035228	Ccdc106	0.4044	0.358
ENSMUSG00000024413	Npc1	0.4043	5.58e-07
ENSMUSG00000023882	Zfp54	0.4042	0.235
ENSMUSG00000028383	Hsdl2	0.4042	0.00468
ENSMUSG00000036273	Lrrk2	0.404	0.00188
ENSMUSG00000020883	Fbxl20	0.4039	0.00112
ENSMUSG00000058498	Rnf207	0.4033	0.851
ENSMUSG00000026421	Csrp1	0.4033	1.9e-12
ENSMUSG00000029101	Rgs12	0.4027	0.000159
ENSMUSG00000037395	Rcor3	0.4027	0.000559
ENSMUSG00000002329	Mdp1	0.4025	0.000602
ENSMUSG00000027995	Tlr2	0.4025	0.0703
ENSMUSG00000000489	Pdgfb	0.4025	0.0036
ENSMUSG00000028957	Per3	0.4025	0.0401
ENSMUSG00000022032	Scara5	0.4025	0.734
ENSMUSG00000071893	Vmn1r4	0.4024	0.783
ENSMUSG00000025150	Cbr2	0.4021	0.418
ENSMUSG00000027961	Lrrc39	0.402	0.713
ENSMUSG00000079339	Ifit1bl1	0.402	0.739
ENSMUSG00000077734	Snord83b	0.402	0.838
ENSMUSG00000097574	C920006O11Rik	0.4019	0.681
ENSMUSG00000078190	Dnm3os	0.4019	0.6
ENSMUSG00000104399	Gm37963	0.4014	0.685
ENSMUSG00000053581	Zfand2a	0.4013	5.98e-05
ENSMUSG00000036561	Ppp6r2	0.4013	0.00243
ENSMUSG00000044966	Fbxo48	0.4011	0.101
ENSMUSG00000097025	Gm26558	0.4009	0.495
ENSMUSG00000034744	Nagk	0.4008	0.0188
ENSMUSG00000097217	Gm26549	0.4006	0.481
ENSMUSG00000034205	Loxl2	0.4006	0.375
ENSMUSG00000026765	Lypd6b	0.4005	0.677
ENSMUSG00000023032	Slc4a8	0.4004	0.162
ENSMUSG00000041343	Ankrd42	0.4002	0.495
ENSMUSG00000073652	Apol7d	0.4002	0.759
ENSMUSG00000102570	Gm37968	0.4002	0.795
ENSMUSG00000031506	Ptpn7	0.3995	0.844
ENSMUSG00000032578	Cish	0.3994	0.231
ENSMUSG00000034799	Unc13a	0.3992	0.419
ENSMUSG00000085376	Gm14508	0.3991	0.665
ENSMUSG00000024299	Adamts10	0.399	0.0342
ENSMUSG00000029186	Pi4k2b	0.3986	3.49e-05
ENSMUSG00000017747	Ghdc	0.3984	0.000417
ENSMUSG00000080718	Gm8019	0.3982	0.801
ENSMUSG00000059456	Ptk2b	0.3979	0.0344
ENSMUSG00000006920	Ezh1	0.3977	0.00091
ENSMUSG00000021504	B4galt7	0.3974	0.00401
ENSMUSG00000028799	Zfp362	0.3974	0.126
ENSMUSG00000078762	Haus5	0.3972	0.185
ENSMUSG00000014668	Chfr	0.3968	2.89e-05
ENSMUSG00000070394	Tmem256	0.3966	6.27e-06
ENSMUSG00000046169	Adamts6	0.3964	0.0227
ENSMUSG00000098332	2310009A05Rik	0.3962	0.193
ENSMUSG00000108049	RP23-226O20.9	0.3962	0.625
ENSMUSG00000061897	Gm14292	0.3959	0.789
ENSMUSG00000102302	Gm38190	0.3957	0.801
ENSMUSG00000053647	Gper1	0.3955	0.783
ENSMUSG00000073471	Rsph3a	0.3954	0.246
ENSMUSG00000080972	Gm16061	0.3954	0.733
ENSMUSG00000081557	Gm5697	0.3949	0.879
ENSMUSG00000052656	Rnf103	0.3945	4.74e-05
ENSMUSG00000051669	AU021092	0.3943	0.58
ENSMUSG00000047473	Zfp30	0.3942	0.0543
ENSMUSG00000098985	Gm27219	0.3942	0.657
ENSMUSG00000090173	Fbxw10	0.3941	0.786
ENSMUSG00000004994	Ccdc130	0.3941	0.00745
ENSMUSG00000045211	Nudt18	0.3939	0.00968
ENSMUSG00000061603	Akap6	0.3937	0.921
ENSMUSG00000021250	Fos	0.3937	0.551
ENSMUSG00000026207	Speg	0.3937	5.66e-09
ENSMUSG00000055065	Ddx17	0.3937	5.12e-22
ENSMUSG00000062116	Zfp954	0.3934	0.0183
ENSMUSG00000053117	E330013P04Rik	0.3933	0.74
ENSMUSG00000000247	Lhx2	0.3932	0.0028
ENSMUSG00000061207	Stk19	0.3931	0.00222
ENSMUSG00000063268	Parp10	0.393	0.0358
ENSMUSG00000041912	Tdrkh	0.3929	0.651
ENSMUSG00000074466	Gm15417	0.3929	0.392
ENSMUSG00000097589	Dleu2	0.3926	0.0268
ENSMUSG00000032589	Bsn	0.3926	0.403
ENSMUSG00000028073	Pear1	0.3925	0.000912
ENSMUSG00000097616	1110019D14Rik	0.3922	0.454
ENSMUSG00000009772	Nuak2	0.3922	0.00279
ENSMUSG00000097831	4930540M05Rik	0.3921	0.744
ENSMUSG00000090641	Zfp712	0.3921	0.561
ENSMUSG00000034845	Plvap	0.392	0.243
ENSMUSG00000031791	Tmem38a	0.3919	0.00116
ENSMUSG00000090235	Gm16244	0.3919	0.707
ENSMUSG00000083390	Gm13121	0.3919	0.915
ENSMUSG00000026399	Cd55	0.3907	0.856
ENSMUSG00000034951	Cog7	0.3904	0.000775
ENSMUSG00000022763	Aifm3	0.3901	0.887
ENSMUSG00000041115	Iqsec2	0.3898	0.0119
ENSMUSG00000005947	Itgae	0.3898	0.728
ENSMUSG00000027309	4930402H24Rik	0.3895	0.000698
ENSMUSG00000006717	Acot13	0.3894	0.000159
ENSMUSG00000072761	Gm6712	0.3891	0.629
ENSMUSG00000025646	Atrip	0.3886	0.672
ENSMUSG00000069020	Urm1	0.3883	3.64e-08
ENSMUSG00000026854	Usp20	0.3882	0.00046
ENSMUSG00000087142	Gm12454	0.3877	0.806
ENSMUSG00000031493	Ggn	0.387	0.608
ENSMUSG00000042359	Osbpl6	0.3868	0.00701
ENSMUSG00000075033	Nxpe3	0.3866	0.0445
ENSMUSG00000107747	RP24-322F4.3	0.3866	0.648
ENSMUSG00000080727	C920021L13Rik	0.3865	0.866
ENSMUSG00000062901	Klhl24	0.3863	0.0175
ENSMUSG00000083449	Gm13487	0.3861	0.869
ENSMUSG00000003623	Crot	0.3858	0.00427
ENSMUSG00000027315	Spint1	0.3857	0.689
ENSMUSG00000027460	Angpt4	0.3857	0.738
ENSMUSG00000040701	Ap1g2	0.3856	0.0416
ENSMUSG00000050382	Kif7	0.3854	0.044
ENSMUSG00000044145	1810024B03Rik	0.3851	0.399
ENSMUSG00000072694	1500011B03Rik	0.3851	0.084
ENSMUSG00000045382	Cxcr4	0.3847	0.832
ENSMUSG00000059555	Tor4a	0.3844	0.0175
ENSMUSG00000061882	Ccdc62	0.3843	0.721
ENSMUSG00000040006	Ginm1	0.3843	0.000523
[truncated: 13,024 more rows]

## Sheet: RNA-seq 48h
Gene	Gene_name	log2FoldChange	padj
ENSMUSG00000037754	Ppp1r16b	8.62	0.00614
ENSMUSG00000046108	Il17c	8.423	0.00691
ENSMUSG00000047180	Neurl3	7.941	0.0141
ENSMUSG00000043747	1520401A03Rik	7.914	0.0138
ENSMUSG00000035964	Tmem59l	7.648	0.0204
ENSMUSG00000032482	Cspg5	7.553	0.019
ENSMUSG00000030270	Cpne9	7.543	0.0221
ENSMUSG00000032679	Cd59a	7.455	0.0285
ENSMUSG00000086212	Mkln1os	7.441	0.0203
ENSMUSG00000013338	Fer1l4	7.417	0.0294
ENSMUSG00000023000	Dhh	7.404	0.0288
ENSMUSG00000033826	Dnah8	7.335	0.0368
ENSMUSG00000035041	Creb3l3	7.334	0.0295
ENSMUSG00000076757	Tcrg-C4	7.32	0.0277
ENSMUSG00000054753	AU018091	7.229	0.0298
ENSMUSG00000003283	Hck	7.218	0.04
ENSMUSG00000046958	4930432E11Rik	7.202	0.0378
ENSMUSG00000020798	Spns3	7.188	0.0288
ENSMUSG00000058297	Spock2	7.144	0.0344
ENSMUSG00000036551	Akap14	7.142	0.0392
ENSMUSG00000095711	Trav14-2	7.042	0.035
ENSMUSG00000045545	Krt14	7.026	0.0363
ENSMUSG00000044708	Kcnj10	6.933	0.0561
ENSMUSG00000034825	Nrip3	6.879	0.0484
ENSMUSG00000064158	Izumo1	6.777	0.068
ENSMUSG00000105355	RP24-274H19.5	6.653	0.0661
ENSMUSG00000099465	Gm3830	6.594	0.0571
ENSMUSG00000074218	Cox7a1	6.485	0.0777
ENSMUSG00000104554	RP23-71G16.6	6.483	0.0871
ENSMUSG00000064646	Gm23300	6.225	0.337
ENSMUSG00000038781	Stap2	5.281	1.69e-05
ENSMUSG00000050762	Prss27	5.164	0.00481
ENSMUSG00000026166	Ccl20	5.13	5.64e-08
ENSMUSG00000040584	Abcb1a	5.081	0.0092
ENSMUSG00000053687	Dpep2	5.005	0.00961
ENSMUSG00000037405	Icam1	4.778	0.00102
ENSMUSG00000060791	Gmfg	4.759	0.0102
ENSMUSG00000026480	Ncf2	4.741	0.0165
ENSMUSG00000026650	Meig1	4.66	0.317
ENSMUSG00000097149	G630030J09Rik	4.578	0.017
ENSMUSG00000034853	Acot11	4.572	0.00123
ENSMUSG00000004837	Grap	4.567	0.0314
ENSMUSG00000091744	Gm17732	4.525	0.027
ENSMUSG00000107388	RP23-408A1.4	4.495	0.0289
ENSMUSG00000031789	Cngb1	4.414	0.00345
ENSMUSG00000101581	C430002N11Rik	4.413	0.0333
ENSMUSG00000006342	Susd2	4.411	6.74e-06
ENSMUSG00000024451	Arap3	4.367	0.0328
ENSMUSG00000096977	Gm10827	4.336	1.35e-11
ENSMUSG00000026841	Fibcd1	4.317	0.0281
ENSMUSG00000068105	Tnfrsf13c	4.216	0.0613
ENSMUSG00000085091	Egfros	4.214	0.0465
ENSMUSG00000070337	Gpr179	4.209	0.0538
ENSMUSG00000023911	Flywch2	4.204	0.00397
ENSMUSG00000085054	Gm15834	4.2	4.62e-05
ENSMUSG00000031877	Ces2g	4.166	0.000918
ENSMUSG00000000530	Acvrl1	4.16	0.000317
ENSMUSG00000086093	Gm15341	4.145	0.0596
ENSMUSG00000034796	Cpne7	4.137	0.0701
ENSMUSG00000044177	Wfikkn2	4.069	0.0657
ENSMUSG00000031397	Tktl1	4.046	0.0503
ENSMUSG00000052565	Hist1h1d	4.03	5.62e-09
ENSMUSG00000021768	Dusp13	4.012	0.0714
ENSMUSG00000032281	Acsbg1	4.006	0.000375
ENSMUSG00000020891	Alox8	3.999	0.00456
ENSMUSG00000011118	Panx3	3.998	0.096
ENSMUSG00000022548	Apod	3.986	0.0844
ENSMUSG00000026170	Cyp27a1	3.932	0.0833
ENSMUSG00000024013	Fgd2	3.914	0.0127
ENSMUSG00000085331	Gm11274	3.91	0.131
ENSMUSG00000102425	Gm26616	3.895	0.0635
ENSMUSG00000026114	Cnga3	3.873	0.0131
ENSMUSG00000026822	Lcn2	3.818	0.1
ENSMUSG00000097636	5830416P10Rik	3.818	0.00679
ENSMUSG00000104168	Gm38250	3.811	0.0078
ENSMUSG00000071633	Gm4952	3.795	0.0145
ENSMUSG00000022483	Col2a1	3.772	0.000632
ENSMUSG00000074923	Pak6	3.769	0.0152
ENSMUSG00000000308	Ckmt1	3.759	0.00197
ENSMUSG00000025172	Ankrd2	3.756	0.0184
ENSMUSG00000000154	Slc22a18	3.753	0.00606
ENSMUSG00000091712	Sec14l5	3.747	0.0201
ENSMUSG00000047562	Mmp10	3.738	0.000976
ENSMUSG00000036295	Lrrn3	3.715	0.089
ENSMUSG00000066800	Rnasel	3.715	0.00601
ENSMUSG00000103024	Gm37685	3.707	0.361
ENSMUSG00000027297	Ltk	3.676	0.0009
ENSMUSG00000028392	Bspry	3.661	0.0272
ENSMUSG00000068263	Efcc1	3.652	0.154
ENSMUSG00000022176	Rem2	3.64	0.149
ENSMUSG00000026580	Selp	3.636	0.0155
ENSMUSG00000028860	Sytl1	3.636	1.46e-06
ENSMUSG00000086127	Gm11934	3.631	0.0313
ENSMUSG00000023045	Soat2	3.602	0.0055
ENSMUSG00000086815	3110082J24Rik	3.555	0.149
ENSMUSG00000071335	G630090E17Rik	3.548	0.207
ENSMUSG00000025746	Il6	3.541	0.0535
ENSMUSG00000101641	Gm29560	3.478	0.223
ENSMUSG00000085843	Kank4os	3.462	0.0336
ENSMUSG00000085527	Gm15535	3.461	0.0492
ENSMUSG00000028435	Aqp3	3.452	0.00514
ENSMUSG00000029055	Plch2	3.451	0.0504
ENSMUSG00000050936	Hist2h2bb	3.45	0.0393
ENSMUSG00000050270	Tmem220	3.433	0.0321
ENSMUSG00000062064	Slc2a7	3.425	0.0453
ENSMUSG00000020932	Gfap	3.406	0.0635
ENSMUSG00000060621	Nkpd1	3.398	0.0107
ENSMUSG00000027022	Xirp2	3.391	0.108
ENSMUSG00000038393	Txnip	3.386	6.84e-151
ENSMUSG00000096035	Gm1045	3.382	0.000213
ENSMUSG00000002791	Pdxk-ps	3.38	0.00314
ENSMUSG00000040828	Catsperd	3.376	0.0488
ENSMUSG00000057143	Trim12c	3.375	0.00385
ENSMUSG00000022015	Tnfsf11	3.37	0.00332
ENSMUSG00000020279	Il9r	3.343	0.0725
ENSMUSG00000058773	Hist1h1b	3.343	3.63e-09
ENSMUSG00000040111	Gramd1b	3.338	0.0168
ENSMUSG00000006411	Pvrl4	3.32	1.68e-06
ENSMUSG00000043020	Wdr63	3.315	0.0518
ENSMUSG00000008496	Pou2f2	3.31	0.204
ENSMUSG00000074207	Adh1	3.31	0.204
ENSMUSG00000058498	Rnf207	3.302	0.0379
ENSMUSG00000045362	Tnfrsf26	3.3	0.0142
ENSMUSG00000044367	Slc16a13	3.299	0.0686
ENSMUSG00000034457	Eda2r	3.292	0.00234
ENSMUSG00000026205	Slc23a3	3.278	0.0165
ENSMUSG00000084866	A930006K02Rik	3.271	0.0202
ENSMUSG00000097383	1500026H17Rik	3.264	0.0583
ENSMUSG00000061531	Tmem236	3.248	0.0239
ENSMUSG00000105731	RP24-409D4.3	3.246	0.257
ENSMUSG00000031506	Ptpn7	3.243	2.64e-05
ENSMUSG00000026208	Des	3.237	7.11e-16
ENSMUSG00000023067	Cdkn1a	3.235	6.42e-158
ENSMUSG00000106438	RP24-63G23.2	3.21	0.1
ENSMUSG00000086890	1700021J08Rik	3.188	0.156
ENSMUSG00000050822	Slc29a4	3.185	0.00689
ENSMUSG00000026831	1700007K13Rik	3.183	0.000827
ENSMUSG00000036908	Unc93b1	3.18	0.0934
ENSMUSG00000064372	mt-Tp	3.149	0.000671
ENSMUSG00000038578	Susd1	3.145	0.00316
ENSMUSG00000054594	Oscar	3.139	0.0676
ENSMUSG00000044349	Snhg11	3.125	0.352
ENSMUSG00000104925	RP23-70G12.3	3.118	0.0925
ENSMUSG00000020793	Galr2	3.115	4.45e-05
ENSMUSG00000027843	Ptpn22	3.11	7.64e-65
ENSMUSG00000002980	Bcam	3.104	0.000279
ENSMUSG00000029348	Asphd2	3.09	0.278
ENSMUSG00000052415	Tchh	3.085	0.0799
ENSMUSG00000024186	Rgs11	3.061	0.0253
ENSMUSG00000002847	Pla1a	3.057	6.37e-06
ENSMUSG00000043631	Ecm2	3.055	0.0701
ENSMUSG00000063704	Mapk15	3.047	0.0579
ENSMUSG00000032128	Robo3	3.044	0.0484
ENSMUSG00000057596	Trim30d	3.035	0.109
ENSMUSG00000024922	Ovol1	3.033	0.00583
ENSMUSG00000040554	Aipl1	3.028	0.0123
ENSMUSG00000020077	Srgn	3.026	0.152
ENSMUSG00000005107	Slc2a9	3.019	0.0932
ENSMUSG00000022805	Maats1	3.019	5.03e-05
ENSMUSG00000034829	Nxnl1	3.018	0.0476
ENSMUSG00000073650	Catip	3.012	0.0519
ENSMUSG00000018238	Gdf9	3.008	8.55e-05
ENSMUSG00000039838	Slc45a1	3.006	0.0955
ENSMUSG00000054932	Afp	3.002	0.0877
ENSMUSG00000038508	Gdf15	2.992	0.00097
ENSMUSG00000030345	Dyrk4	2.978	0.153
ENSMUSG00000052160	Pld4	2.978	0.0402
ENSMUSG00000040552	C3ar1	2.977	0.0115
ENSMUSG00000037188	Grhl3	2.962	0.00914
ENSMUSG00000027456	Sdcbp2	2.961	4.21e-16
ENSMUSG00000105613	RP23-31J24.2	2.957	0.0067
ENSMUSG00000093661	Eif4e3	2.935	0.00347
ENSMUSG00000001827	Folr1	2.922	0.00159
ENSMUSG00000043388	Tmem130	2.919	7.77e-08
ENSMUSG00000068697	Myoz1	2.918	0.115
ENSMUSG00000039238	Zfp750	2.909	0.00163
ENSMUSG00000085596	Gm11476	2.906	0.1
ENSMUSG00000044313	Mab21l3	2.893	0.183
ENSMUSG00000066258	Trim12a	2.865	0.0803
ENSMUSG00000049191	Rgag4	2.864	0.0409
ENSMUSG00000024039	Cbs	2.863	0.00472
ENSMUSG00000068417	Pnp2	2.863	0.069
ENSMUSG00000015957	Wnt11	2.858	1.41e-10
ENSMUSG00000032224	Fam81a	2.854	0.0015
ENSMUSG00000028841	Cnksr1	2.853	0.0248
ENSMUSG00000025727	A930017K11Rik	2.846	0.0716
ENSMUSG00000016494	Cd34	2.845	0.0055
ENSMUSG00000022838	Eaf2	2.843	3.34e-05
ENSMUSG00000023224	Serping1	2.835	0.0728
ENSMUSG00000030088	Aldh1l1	2.832	0.145
ENSMUSG00000051590	Map3k19	2.832	0.182
ENSMUSG00000036553	Sh3tc1	2.829	0.000526
ENSMUSG00000041920	Slc16a6	2.821	1.22e-07
ENSMUSG00000071203	Naip5	2.812	0.0617
ENSMUSG00000026628	Atf3	2.799	4.59e-110
ENSMUSG00000074899	Sptbn5	2.793	0.0964
ENSMUSG00000026175	Vil1	2.792	0.122
ENSMUSG00000041117	Ccdc8	2.784	0.0546
ENSMUSG00000040350	Trim7	2.78	5.3e-12
ENSMUSG00000029442	Wdr66	2.776	1.96e-05
ENSMUSG00000029468	P2rx7	2.776	3.23e-08
ENSMUSG00000038224	Serpinf2	2.768	0.0846
ENSMUSG00000025175	Fn3k	2.759	0.128
ENSMUSG00000035773	Kiss1r	2.749	9.51e-05
ENSMUSG00000020017	Hal	2.731	0.0305
ENSMUSG00000028211	Trp53inp1	2.725	2.64e-23
ENSMUSG00000022840	Adcy5	2.711	0.155
ENSMUSG00000073778	Faddos	2.707	0.106
ENSMUSG00000087314	Prkag2os2	2.707	0.0265
ENSMUSG00000091462	Gm17084	2.706	0.11
ENSMUSG00000103364	Gm38157	2.701	0.166
ENSMUSG00000053914	Kdm4d	2.695	0.0874
ENSMUSG00000056656	Apol8	2.69	2.28e-06
ENSMUSG00000002475	Abhd3	2.685	0.00376
ENSMUSG00000039563	2210406O10Rik	2.684	0.0053
ENSMUSG00000032246	Calml4	2.683	0.00933
ENSMUSG00000059022	Kcp	2.678	0.159
ENSMUSG00000064267	Hvcn1	2.677	0.0591
ENSMUSG00000040441	Slc26a10	2.674	0.038
ENSMUSG00000020399	Havcr2	2.673	0.00962
ENSMUSG00000030134	Rasgef1a	2.667	0.000207
ENSMUSG00000026475	Rgs16	2.661	0.00191
ENSMUSG00000024391	Apom	2.653	0.0671
ENSMUSG00000056054	S100a8	2.653	0.16
ENSMUSG00000025129	Ppp1r27	2.65	0.151
ENSMUSG00000038811	Gngt2	2.645	0.0443
ENSMUSG00000029019	Nppb	2.642	8.21e-09
ENSMUSG00000097744	D030040B21Rik	2.642	0.11
ENSMUSG00000031825	Crispld2	2.635	0.00141
ENSMUSG00000013928	Thap8	2.634	0.0131
ENSMUSG00000025383	Il23a	2.624	0.0808
ENSMUSG00000087610	Gm16253	2.622	0.05
ENSMUSG00000022221	Ripk3	2.62	9.98e-05
ENSMUSG00000060176	Kif27	2.619	0.107
ENSMUSG00000030827	Fgf21	2.614	0.0963
ENSMUSG00000041073	Nacad	2.614	8.08e-11
ENSMUSG00000001930	Vwf	2.612	0.153
ENSMUSG00000034226	Rhov	2.607	0.109
ENSMUSG00000028825	Rhd	2.602	0.0309
ENSMUSG00000090362	Vmn2r79	2.602	0.112
ENSMUSG00000052396	Mogat2	2.598	4.48e-05
ENSMUSG00000034917	Tjp3	2.596	0.00965
ENSMUSG00000015533	Itga2	2.595	0.245
ENSMUSG00000103685	Gm37074	2.59	0.323
ENSMUSG00000058183	Mmel1	2.581	0.243
ENSMUSG00000034282	Evpl	2.578	1.3e-06
ENSMUSG00000087371	Gm15541	2.577	0.0357
ENSMUSG00000053559	Smagp	2.576	0.19
ENSMUSG00000097254	C430042M11Rik	2.575	0.0218
ENSMUSG00000039217	Il18	2.574	0.00688
ENSMUSG00000041361	Myzap	2.572	0.0666
ENSMUSG00000002104	Rapsn	2.57	2.61e-06
ENSMUSG00000040624	Plekhg1	2.567	0.146
ENSMUSG00000096950	Gm9530	2.563	0.000129
ENSMUSG00000052776	Oas1a	2.562	0.00299
ENSMUSG00000056055	Sag	2.56	0.0588
ENSMUSG00000061603	Akap6	2.549	0.235
ENSMUSG00000039110	Mycbpap	2.544	0.277
ENSMUSG00000058463	Gm5471	2.544	0.118
ENSMUSG00000035385	Ccl2	2.542	3.74e-87
ENSMUSG00000056498	Tmem154	2.542	0.0678
ENSMUSG00000107336	RP24-544J6.5	2.537	0.0605
ENSMUSG00000031790	Mmp15	2.535	2.75e-11
ENSMUSG00000105107	RP23-214I6.4	2.532	0.0822
ENSMUSG00000105679	RP23-307I19.1	2.531	0.0901
ENSMUSG00000034936	Arl4d	2.53	1.02e-08
ENSMUSG00000022598	Psca	2.529	0.0357
ENSMUSG00000040435	Ppp1r15a	2.524	1.7e-213
ENSMUSG00000079598	Clec2l	2.52	0.0661
ENSMUSG00000031886	Ces2e	2.511	0.00049
ENSMUSG00000050578	Mmp13	2.508	0.000522
ENSMUSG00000020788	Atp2a3	2.507	0.000265
ENSMUSG00000046854	Pip5kl1	2.506	0.00051
ENSMUSG00000045467	Ttll13	2.504	0.167
ENSMUSG00000021298	Gpr132	2.496	0.257
ENSMUSG00000035818	Plekhs1	2.493	4.5e-08
ENSMUSG00000105826	RP23-41J13.2	2.491	0.0407
ENSMUSG00000056215	Lrguk	2.487	0.122
ENSMUSG00000002257	Def6	2.485	7.52e-05
ENSMUSG00000071103	1700029J07Rik	2.481	1.59e-05
ENSMUSG00000103976	Gm37677	2.481	0.0532
ENSMUSG00000026809	1700026L06Rik	2.48	0.034
ENSMUSG00000077285	Gm26394	2.479	0.268
ENSMUSG00000062826	Ces2f	2.476	0.177
ENSMUSG00000032648	Pygm	2.472	4.07e-08
ENSMUSG00000055632	Hmcn2	2.465	1.15e-05
ENSMUSG00000050957	Insl6	2.462	6.38e-07
ENSMUSG00000022853	Ehhadh	2.46	0.0128
ENSMUSG00000036062	Phf24	2.458	0.315
ENSMUSG00000026360	Rgs2	2.453	0.0128
ENSMUSG00000078995	Zfp456	2.451	0.151
ENSMUSG00000031775	Pllp	2.45	0.115
ENSMUSG00000038555	Reep2	2.447	0.00427
ENSMUSG00000004371	Il11	2.445	2.07e-09
ENSMUSG00000050395	Tnfsf15	2.445	9.04e-10
ENSMUSG00000020892	Aloxe3	2.439	3.29e-08
ENSMUSG00000084938	BB557941	2.427	0.11
ENSMUSG00000018554	Ybx2	2.426	0.0215
ENSMUSG00000024379	Tslp	2.425	0.000218
ENSMUSG00000044788	Fads6	2.424	0.0581
ENSMUSG00000071656	Lrrn4cl	2.424	1.15e-19
ENSMUSG00000038067	Csf3	2.423	0.0167
ENSMUSG00000087142	Gm12454	2.423	0.00305
ENSMUSG00000027420	Bfsp1	2.417	0.0563
ENSMUSG00000027463	Slc52a3	2.411	7.61e-06
ENSMUSG00000032066	Bco2	2.411	0.152
ENSMUSG00000008153	Clstn3	2.408	0.00738
ENSMUSG00000027408	Cpxm1	2.406	0.00142
ENSMUSG00000036390	Gadd45a	2.397	6.1e-111
ENSMUSG00000026018	Ica1l	2.391	0.00392
ENSMUSG00000060314	Zfp941	2.378	0.0115
ENSMUSG00000034265	Zdhhc14	2.365	0.203
ENSMUSG00000051359	Ncald	2.362	0.132
ENSMUSG00000087008	Gm5530	2.36	0.0812
ENSMUSG00000020461	Clhc1	2.357	0.0287
ENSMUSG00000044231	Nhlrc1	2.357	0.16
ENSMUSG00000027368	Dusp2	2.356	0.0178
ENSMUSG00000036944	Tmem71	2.354	0.253
ENSMUSG00000068735	Trp53i11	2.353	0.0568
ENSMUSG00000057054	Inca1	2.351	3.95e-05
ENSMUSG00000038295	Atg9b	2.343	1.89e-16
ENSMUSG00000012123	Aim1l	2.339	0.144
ENSMUSG00000029503	P2rx2	2.337	0.0369
ENSMUSG00000107810	RP24-363O21.8	2.335	0.0657
ENSMUSG00000004035	Gstm7	2.332	0.0807
ENSMUSG00000039629	Strip2	2.331	1.61e-06
ENSMUSG00000052688	Rab7b	2.331	5.2e-06
ENSMUSG00000034706	Dnaic2	2.33	1.08e-05
ENSMUSG00000029651	Mtus2	2.329	0.065
ENSMUSG00000085024	C230035I16Rik	2.325	0.00663
ENSMUSG00000097174	Gm4890	2.323	0.00466
ENSMUSG00000053552	Ebf4	2.321	7.8e-11
ENSMUSG00000028773	Fabp3	2.32	0.0133
ENSMUSG00000069581	Tspear	2.32	0.342
ENSMUSG00000023484	Prph	2.319	1.71e-06
ENSMUSG00000030854	Ptpn5	2.319	0.0397
ENSMUSG00000028943	Espn	2.315	2.73e-05
ENSMUSG00000001076	C1ql4	2.312	0.0374
ENSMUSG00000100937	1700020D05Rik	2.31	0.0535
ENSMUSG00000069227	Gprin1	2.309	0.221
ENSMUSG00000030895	Hpx	2.304	0.0403
ENSMUSG00000079484	Phyhd1	2.303	0.065
ENSMUSG00000087273	Gm13203	2.302	0.22
ENSMUSG00000040231	Syngr4	2.301	0.00998
ENSMUSG00000021904	Sema3g	2.3	7.49e-05
ENSMUSG00000026692	Fmo4	2.3	0.164
ENSMUSG00000027570	Col9a3	2.299	0.00196
ENSMUSG00000030187	Klra2	2.297	0.159
ENSMUSG00000086900	Kcnab3os	2.291	0.123
ENSMUSG00000102018	K230010J24Rik	2.288	3.68e-10
ENSMUSG00000075122	Cd80	2.287	0.00267
ENSMUSG00000029660	Tex26	2.285	0.184
ENSMUSG00000106510	RP23-231J6.1	2.284	0.145
ENSMUSG00000044165	Bcl2l15	2.283	0.153
ENSMUSG00000036091	Hyal3	2.279	0.0441
ENSMUSG00000051048	P4ha3	2.279	1.68e-06
ENSMUSG00000044176	Spink10	2.277	0.072
ENSMUSG00000108218	Olfr1372-ps1	2.277	0.135
ENSMUSG00000057948	Unc13d	2.274	6.71e-10
ENSMUSG00000016995	Matn4	2.27	0.0391
ENSMUSG00000021250	Fos	2.266	1.12e-06
ENSMUSG00000084769	Gm12061	2.263	0.0746
ENSMUSG00000024866	Acy3	2.261	4.53e-30
ENSMUSG00000036687	Tmem184a	2.257	6.93e-12
ENSMUSG00000000486	Sept1	2.256	7.79e-06
ENSMUSG00000044258	Ctla2a	2.256	0.0201
ENSMUSG00000043099	Hic1	2.255	0.0835
ENSMUSG00000042759	Apobr	2.252	3.05e-33
ENSMUSG00000011148	Adssl1	2.25	0.00017
ENSMUSG00000050315	Synpo2	2.242	1.83e-07
ENSMUSG00000024521	Pmaip1	2.236	2.3e-38
ENSMUSG00000101549	Gm29630	2.236	0.021
ENSMUSG00000107734	RP24-459O3.3	2.227	0.00371
ENSMUSG00000054474	Thnsl2	2.225	0.108
ENSMUSG00000044162	Tnip3	2.224	0.0305
ENSMUSG00000018776	Slc35g3	2.223	0.0845
ENSMUSG00000024778	Fas	2.219	4.59e-13
ENSMUSG00000028064	Sema4a	2.217	0.0106
ENSMUSG00000025170	Rab40b	2.216	5.27e-05
ENSMUSG00000006675	P4htm	2.214	0.00766
ENSMUSG00000003273	Car11	2.211	3.88e-05
ENSMUSG00000020432	Tcn2	2.206	5.95e-30
ENSMUSG00000052760	A630001G21Rik	2.206	0.124
ENSMUSG00000051113	Fam71e1	2.204	0.195
ENSMUSG00000041205	Map6d1	2.198	0.0166
ENSMUSG00000047904	Sstr2	2.198	0.0187
ENSMUSG00000028681	Ptch2	2.197	0.0247
ENSMUSG00000042109	Csdc2	2.197	0.0913
ENSMUSG00000096727	Psmb9	2.196	0.144
ENSMUSG00000018102	Hist1h2bc	2.194	1.01e-35
ENSMUSG00000021534	1700001L19Rik	2.192	0.406
ENSMUSG00000097121	D130020L05Rik	2.192	0.075
ENSMUSG00000007888	Crlf1	2.191	1.35e-60
ENSMUSG00000024936	Kcnk7	2.191	0.0831
ENSMUSG00000020658	Efr3b	2.184	3.78e-08
ENSMUSG00000037161	Mgarp	2.183	0.0003
ENSMUSG00000085347	Hk1os	2.183	6.63e-05
ENSMUSG00000028278	Rragd	2.181	0.00938
ENSMUSG00000089808	Gm7241	2.181	0.0912
ENSMUSG00000037944	Ccr7	2.18	0.232
ENSMUSG00000032726	Bmp8a	2.179	0.00154
ENSMUSG00000038540	Tmc3	2.173	0.0238
ENSMUSG00000053693	Mast1	2.167	0.0864
ENSMUSG00000064427	Gm22748	2.166	0.277
ENSMUSG00000029596	Sdsl	2.162	8.01e-06
ENSMUSG00000016496	Cd274	2.157	1.97e-07
ENSMUSG00000025272	Tro	2.157	0.0573
ENSMUSG00000035929	H2-Q4	2.156	9.99e-10
ENSMUSG00000029999	Tgfa	2.154	4.4e-05
ENSMUSG00000029828	4921507P07Rik	2.153	0.0884
ENSMUSG00000025537	Phkg1	2.151	0.0554
ENSMUSG00000034764	1700006J14Rik	2.149	0.0786
ENSMUSG00000041912	Tdrkh	2.149	1.79e-05
ENSMUSG00000075511	1700001L05Rik	2.149	0.0974
ENSMUSG00000009093	Gstt4	2.148	0.243
ENSMUSG00000102758	Naaladl2	2.147	0.00791
ENSMUSG00000026870	Cutal	2.144	0.465
ENSMUSG00000029370	Rassf6	2.144	0.0101
ENSMUSG00000087331	1810021B22Rik	2.144	0.119
ENSMUSG00000035509	Fbxl21	2.142	0.159
ENSMUSG00000056271	Lman1l	2.136	0.00121
ENSMUSG00000063672	Nkx6-3	2.135	0.211
ENSMUSG00000087496	Gm13523	2.135	0.138
ENSMUSG00000091971	Hspa1a	2.135	0.161
ENSMUSG00000049539	Hist1h1a	2.134	0.0115
ENSMUSG00000045102	Poln	2.13	0.0129
ENSMUSG00000034687	Fras1	2.129	0.145
ENSMUSG00000083284	Gm13688	2.129	0.122
ENSMUSG00000043670	Diras1	2.128	0.105
ENSMUSG00000039865	Slc44a3	2.127	0.153
ENSMUSG00000097874	C030010L15Rik	2.121	0.206
ENSMUSG00000022763	Aifm3	2.12	0.169
ENSMUSG00000080727	C920021L13Rik	2.12	0.15
ENSMUSG00000026765	Lypd6b	2.112	0.000368
ENSMUSG00000069874	Irgm2	2.112	7.84e-05
ENSMUSG00000035473	Galm	2.104	4.21e-08
ENSMUSG00000034949	Zfr2	2.103	0.000541
ENSMUSG00000097579	Gm26799	2.103	0.106
ENSMUSG00000000197	Nalcn	2.1	0.115
ENSMUSG00000070331	Qrich2	2.1	0.248
ENSMUSG00000082884	Gm13339	2.1	0.365
ENSMUSG00000085211	B430219N15Rik	2.097	0.228
ENSMUSG00000024459	H2-M5	2.096	0.189
ENSMUSG00000041439	Mfsd6	2.095	0.139
ENSMUSG00000018566	Slc2a4	2.091	0.0468
ENSMUSG00000078439	Smim24	2.089	0.065
ENSMUSG00000087685	1700122E12Rik	2.088	0.301
ENSMUSG00000030306	Tmtc1	2.083	0.282
ENSMUSG00000098041	Gm26981	2.083	0.0089
ENSMUSG00000003134	Tbc1d8	2.082	8.22e-07
ENSMUSG00000029771	Irf5	2.078	3.72e-06
ENSMUSG00000020423	Btg2	2.076	6.05e-50
ENSMUSG00000027470	Mylk2	2.071	0.103
ENSMUSG00000078816	Prkcg	2.071	9.38e-10
ENSMUSG00000089901	Gm8113	2.071	0.0337
ENSMUSG00000077192	Snora17	2.069	0.075
ENSMUSG00000033368	Trim69	2.066	0.0507
ENSMUSG00000097154	Gm26510	2.066	0.222
ENSMUSG00000101191	Gm28809	2.059	0.0156
ENSMUSG00000032489	Kif9	2.058	0.0543
ENSMUSG00000028972	Car6	2.056	0.000137
ENSMUSG00000038349	Plcl1	2.055	0.0664
ENSMUSG00000037321	Tap1	2.05	8.77e-08
ENSMUSG00000031133	Arhgef6	2.049	0.138
ENSMUSG00000034792	Gna15	2.047	0.214
ENSMUSG00000083282	Ctsf	2.046	5.23e-05
ENSMUSG00000021095	Gsc	2.045	0.0482
ENSMUSG00000054136	Adm2	2.045	0.107
ENSMUSG00000087347	1700047K16Rik	2.044	0.182
ENSMUSG00000048458	Fam212b	2.04	2.52e-10
ENSMUSG00000029408	Abcb9	2.037	0.00545
ENSMUSG00000036292	Gramd1c	2.037	0.00426
ENSMUSG00000061411	Nol4l	2.031	0.00285
ENSMUSG00000022367	Has2	2.027	0.000273
ENSMUSG00000025069	Gsto2	2.027	0.00843
ENSMUSG00000042647	Acad12	2.027	1.11e-05
ENSMUSG00000047246	Hist1h2be	2.027	0.000224
ENSMUSG00000051246	Msantd1	2.023	0.117
ENSMUSG00000053675	Tgm5	2.023	0.177
ENSMUSG00000026589	Sec16b	2.021	0.113
ENSMUSG00000023443	Esx1	2.017	0.0114
ENSMUSG00000074269	Rec114	2.017	0.0156
ENSMUSG00000031451	Gas6	2.012	0.359
ENSMUSG00000025082	Vwa2	2.01	0.169
ENSMUSG00000035984	Nme5	2.007	0.0884
ENSMUSG00000067872	Ccdc87	2.002	0.3
ENSMUSG00000086638	4930405A21Rik	2	0.00644
ENSMUSG00000036353	P2ry12	1.998	0.19
ENSMUSG00000043557	Mdga1	1.997	0.194
ENSMUSG00000082292	Gm12250	1.997	0.185
ENSMUSG00000050394	Armcx6	1.993	0.00883
ENSMUSG00000084817	Gm5526	1.99	0.125
ENSMUSG00000058589	Anks1b	1.983	0.000368
ENSMUSG00000037224	Zfyve28	1.982	0.0819
ENSMUSG00000089706	B230216N24Rik	1.978	0.00416
ENSMUSG00000052485	Tmem171	1.977	3.8e-09
ENSMUSG00000034227	Foxj1	1.974	0.0492
ENSMUSG00000034579	Pla2g3	1.974	0.244
ENSMUSG00000030411	Nova2	1.973	0.0246
ENSMUSG00000001558	Klhl10	1.972	0.0385
ENSMUSG00000073599	Ecscr	1.971	0.109
ENSMUSG00000051805	A530095I07Rik	1.97	0.0603
ENSMUSG00000036862	Dchs1	1.966	0.274
ENSMUSG00000042985	Upk3b	1.966	0.000318
ENSMUSG00000085183	Gm12603	1.965	2.06e-13
ENSMUSG00000029121	Crmp1	1.96	0.115
ENSMUSG00000052837	Junb	1.958	4.27e-90
ENSMUSG00000053216	Btn2a2	1.958	0.0496
ENSMUSG00000087684	1200007C13Rik	1.958	0.148
ENSMUSG00000019122	Ccl9	1.952	6.81e-09
ENSMUSG00000029378	Areg	1.952	7.04e-06
ENSMUSG00000035095	Fam167a	1.952	5.94e-10
ENSMUSG00000104475	D630036G22Rik	1.948	1.17e-12
ENSMUSG00000081611	Gm13651	1.939	0.123
ENSMUSG00000022040	Ephx2	1.938	0.0881
ENSMUSG00000091993	B930036N10Rik	1.934	0.0409
ENSMUSG00000006313	Upk1a	1.932	0.009
ENSMUSG00000020475	Pgam2	1.932	0.000155
ENSMUSG00000001166	Oas1c	1.927	0.00535
ENSMUSG00000003545	Fosb	1.927	0.000234
ENSMUSG00000054256	Msi1	1.925	0.0355
ENSMUSG00000020184	Mdm2	1.924	7.69e-178
ENSMUSG00000051851	Cxx1c	1.924	0.0285
ENSMUSG00000032591	Mst1	1.922	0.2
ENSMUSG00000022768	Ccdc116	1.921	0.0526
ENSMUSG00000030428	Ttyh1	1.918	0.00342
ENSMUSG00000020183	Cpm	1.917	0.107
ENSMUSG00000048521	Cxcr6	1.916	0.317
ENSMUSG00000063651	Cnfn	1.914	0.0302
ENSMUSG00000048349	Pou4f1	1.91	0.116
ENSMUSG00000006143	Upk3bl	1.908	0.0694
ENSMUSG00000048865	Arhgap30	1.905	0.194
ENSMUSG00000026222	Sp100	1.903	0.133
ENSMUSG00000050675	Gp1ba	1.903	0.114
ENSMUSG00000049811	Fam161a	1.902	1.43e-05
ENSMUSG00000081219	Bambi-ps1	1.9	0.0475
ENSMUSG00000059900	Tmem40	1.899	0.00328
ENSMUSG00000021259	Cyp46a1	1.897	0.01
ENSMUSG00000087028	Gm13387	1.897	0.12
ENSMUSG00000085665	Gm12059	1.896	0.0161
ENSMUSG00000028088	Fmo5	1.895	0.215
ENSMUSG00000072115	Ang	1.895	2.53e-09
ENSMUSG00000041329	Atp1b2	1.894	0.0241
ENSMUSG00000050106	Tmc8	1.894	0.0879
ENSMUSG00000104528	RP23-287M3.2	1.894	0.235
ENSMUSG00000003559	As3mt	1.893	0.143
ENSMUSG00000002289	Angptl4	1.891	0.0104
ENSMUSG00000020173	Cobl	1.891	0.0167
ENSMUSG00000104662	RP24-82B23.5	1.889	0.161
ENSMUSG00000074151	Nlrc5	1.887	0.0163
ENSMUSG00000008129	4930432K21Rik	1.885	0.000465
ENSMUSG00000030468	Siglecg	1.884	4.74e-12
ENSMUSG00000035944	Ttc38	1.884	0.00891
ENSMUSG00000107355	RP24-80F7.5	1.883	0.112
ENSMUSG00000026971	Itgb6	1.882	0.306
ENSMUSG00000038893	Fam117a	1.879	4.79e-15
ENSMUSG00000106717	RP24-86I23.4	1.879	0.033
ENSMUSG00000018986	Slfn3	1.878	0.0556
ENSMUSG00000020758	Itgb4	1.878	9.51e-07
ENSMUSG00000046410	Kcnk6	1.876	0.165
ENSMUSG00000034570	Inpp5j	1.875	1.1e-05
ENSMUSG00000097557	C130060C02Rik	1.875	0.125
ENSMUSG00000031785	Adgrg1	1.874	0.000246
ENSMUSG00000051735	Rinl	1.874	0.0655
ENSMUSG00000085256	Dmrta2os	1.87	0.328
ENSMUSG00000085162	Gm12295	1.868	0.153
ENSMUSG00000027489	Necab3	1.867	0.00271
ENSMUSG00000048721	Fndc9	1.867	0.252
ENSMUSG00000018844	Fndc8	1.866	0.168
ENSMUSG00000044034	Npb	1.866	0.107
ENSMUSG00000021798	Ldb3	1.865	0.000391
ENSMUSG00000025933	Tmem14a	1.865	0.00117
ENSMUSG00000030699	Tbx6	1.865	0.215
ENSMUSG00000036181	Hist1h1c	1.865	2.35e-63
ENSMUSG00000071181	3830408C21Rik	1.865	0.0906
ENSMUSG00000002578	Ikzf4	1.862	0.000334
ENSMUSG00000027636	Sla2	1.862	0.000254
ENSMUSG00000002228	Ppm1j	1.859	0.0292
ENSMUSG00000041849	Card6	1.858	0.0108
ENSMUSG00000040907	Atp1a3	1.856	0.107
ENSMUSG00000032135	Mcam	1.851	1.01e-91
ENSMUSG00000075334	Rprm	1.849	0.0232
ENSMUSG00000027858	Tspan2	1.848	0.0956
ENSMUSG00000100798	Gm19589	1.848	0.0284
ENSMUSG00000025646	Atrip	1.846	0.00344
ENSMUSG00000026458	Ppfia4	1.846	0.262
ENSMUSG00000058812	0610039K10Rik	1.845	0.128
ENSMUSG00000025911	Adhfe1	1.843	0.122
ENSMUSG00000042485	Mustn1	1.843	5.23e-05
ENSMUSG00000023979	Guca1b	1.84	0.0101
ENSMUSG00000024899	Papss2	1.839	1.69e-24
ENSMUSG00000026638	Irf6	1.839	0.123
ENSMUSG00000032717	Mdfi	1.839	0.113
ENSMUSG00000097993	Ptprv	1.838	0.0245
ENSMUSG00000029436	Mmp17	1.837	0.0277
ENSMUSG00000078771	Evi2a	1.834	9.97e-05
ENSMUSG00000085006	BC021767	1.833	0.184
ENSMUSG00000037580	Gch1	1.832	1.87e-12
ENSMUSG00000010538	Tsacc	1.831	0.00216
ENSMUSG00000097357	Gm16793	1.829	0.125
ENSMUSG00000097337	Gm26606	1.827	0.00263
ENSMUSG00000102278	Gm37145	1.826	1.23e-05
ENSMUSG00000042500	Ago4	1.825	0.031
ENSMUSG00000051984	Sec31b	1.82	0.167
ENSMUSG00000086358	Gm13270	1.82	0.226
ENSMUSG00000105804	RP23-173N16.4	1.82	0.158
ENSMUSG00000078486	Perm1	1.818	0.00189
ENSMUSG00000041954	Tnfrsf18	1.811	0.142
ENSMUSG00000066058	Cldn19	1.811	0.318
ENSMUSG00000036251	Trpm8	1.809	0.278
ENSMUSG00000033350	Chst2	1.808	0.00897
ENSMUSG00000053062	Jam2	1.807	0.0658
ENSMUSG00000084989	Crocc2	1.806	0.242
ENSMUSG00000051067	Lingo3	1.805	0.291
ENSMUSG00000089849	Runx2os2	1.805	0.121
ENSMUSG00000042816	Gpr151	1.802	0.36
ENSMUSG00000031351	Zfp185	1.798	0.00333
ENSMUSG00000035506	Slc12a8	1.796	0.166
ENSMUSG00000078942	Naip6	1.794	0.0219
ENSMUSG00000026875	Traf1	1.793	1.09e-06
ENSMUSG00000031883	Car7	1.792	0.0839
ENSMUSG00000054304	D130007C19Rik	1.791	0.0479
ENSMUSG00000074398	Gm15441	1.791	0.225
ENSMUSG00000023393	Slc17a9	1.79	0.22
ENSMUSG00000078653	Cntd1	1.79	0.0286
ENSMUSG00000103183	Gm37090	1.79	0.0559
ENSMUSG00000004187	Kifc2	1.788	4.25e-07
ENSMUSG00000059498	Fcgr3	1.788	0.015
ENSMUSG00000017832	Hspb9	1.787	0.1
ENSMUSG00000026188	Tmem169	1.783	5.47e-05
ENSMUSG00000020227	Irak3	1.781	0.0472
ENSMUSG00000034394	Lif	1.78	8.87e-42
ENSMUSG00000054855	Rnd1	1.779	8.33e-58
ENSMUSG00000039462	Col10a1	1.776	0.0126
ENSMUSG00000020407	Upp1	1.774	0.00581
ENSMUSG00000040035	Disp2	1.772	0.168
ENSMUSG00000097572	Gm26797	1.772	0.0159
ENSMUSG00000096847	Tmem151b	1.771	0.192
ENSMUSG00000097317	Gm17281	1.77	0.124
ENSMUSG00000083914	Rps18-ps1	1.769	0.309
ENSMUSG00000087651	1500009L16Rik	1.767	0.00889
ENSMUSG00000045746	B230317F23Rik	1.765	0.208
ENSMUSG00000085957	Syna	1.764	0.174
ENSMUSG00000097534	Gm16675	1.764	0.101
ENSMUSG00000030823	9130019O22Rik	1.762	0.188
ENSMUSG00000025650	Col7a1	1.761	5.12e-23
ENSMUSG00000022885	St6gal1	1.758	0.0685
ENSMUSG00000032561	Acpp	1.755	0.000276
ENSMUSG00000017817	Jph2	1.753	0.293
ENSMUSG00000028751	Pla2g2e	1.753	0.011
ENSMUSG00000019989	Enpp3	1.75	0.0945
ENSMUSG00000006221	Hspb7	1.749	0.0965
ENSMUSG00000035211	Xrra1	1.747	0.235
ENSMUSG00000025270	Alas2	1.746	0.23
ENSMUSG00000026414	Tnnt2	1.746	1.9e-08
ENSMUSG00000039158	Akna	1.745	2.36e-07
ENSMUSG00000097960	A330074K22Rik	1.744	0.0044
ENSMUSG00000106464	RP24-309H3.5	1.743	0.000201
ENSMUSG00000040723	Rcsd1	1.742	0.256
ENSMUSG00000097835	Gm26910	1.74	0.0144
ENSMUSG00000047963	Stbd1	1.738	0.00965
ENSMUSG00000057093	C030039L03Rik	1.737	0.00081
ENSMUSG00000097113	Gm19705	1.736	2.05e-07
ENSMUSG00000025500	Lmntd2	1.735	0.00051
ENSMUSG00000006462	A530013C23Rik	1.733	0.243
ENSMUSG00000046961	Gpr156	1.732	0.186
ENSMUSG00000100337	Gm5066	1.732	0.276
ENSMUSG00000105198	RP23-158A20.7	1.732	0.246
ENSMUSG00000039943	Plcb4	1.73	0.284
ENSMUSG00000034818	Celf5	1.729	9.41e-05
ENSMUSG00000069267	Hist1h3b	1.725	0.232
ENSMUSG00000053797	Krt16	1.724	0.21
ENSMUSG00000086578	Gm13583	1.723	0.429
ENSMUSG00000097020	Gm26613	1.723	0.211
ENSMUSG00000028023	Pitx2	1.721	0.122
ENSMUSG00000000202	Btbd17	1.719	0.347
ENSMUSG00000047293	Gpr15	1.719	0.334
ENSMUSG00000024769	Cdc42bpg	1.718	1.88e-40
ENSMUSG00000097592	4930500F10Rik	1.718	0.266
ENSMUSG00000086213	A330040F15Rik	1.715	0.284
ENSMUSG00000103839	Gm37607	1.715	5.91e-05
ENSMUSG00000020599	Rgs9	1.714	0.101
ENSMUSG00000029361	Nos1	1.714	0.308
ENSMUSG00000052302	Tbc1d30	1.713	0.219
ENSMUSG00000086368	Gm13830	1.712	0.267
ENSMUSG00000056602	Fry	1.711	0.0482
ENSMUSG00000063296	Tmem117	1.711	0.203
ENSMUSG00000086741	Gm15816	1.71	0.0398
ENSMUSG00000028965	Tnfrsf9	1.708	7.36e-05
ENSMUSG00000013158	4933405L10Rik	1.707	0.0425
ENSMUSG00000034910	Pygo1	1.707	0.003
ENSMUSG00000038523	1700003F12Rik	1.707	8.04e-06
ENSMUSG00000024871	Doc2g	1.706	1.48e-06
ENSMUSG00000030041	M1ap	1.705	0.00905
ENSMUSG00000006386	Tek	1.704	0.109
ENSMUSG00000031450	Grk1	1.702	0.326
ENSMUSG00000024164	C3	1.699	5.16e-07
ENSMUSG00000030321	Efcab12	1.699	0.276
ENSMUSG00000043664	Tmem221	1.699	0.0156
ENSMUSG00000032487	Ptgs2	1.694	6.9e-13
ENSMUSG00000027938	Creb3l4	1.693	0.0989
ENSMUSG00000085586	Gm11613	1.691	0.0449
ENSMUSG00000019997	Ctgf	1.69	2.79e-87
ENSMUSG00000028445	Enho	1.69	0.258
ENSMUSG00000031891	Hsd11b2	1.688	0.0958
ENSMUSG00000052676	Zmat1	1.688	1.24e-05
ENSMUSG00000039798	2600006K01Rik	1.687	0.106
ENSMUSG00000041930	Fam222a	1.685	0.0323
ENSMUSG00000045087	S1pr5	1.685	0.139
ENSMUSG00000085803	Gm12056	1.685	0.0166
ENSMUSG00000019850	Tnfaip3	1.682	1.61e-21
ENSMUSG00000037363	Letm2	1.682	6.26e-06
ENSMUSG00000038605	Samd10	1.679	0.00338
ENSMUSG00000097115	1810019N24Rik	1.679	0.401
ENSMUSG00000000706	Btn1a1	1.677	0.0123
ENSMUSG00000030465	Psd3	1.677	0.0341
ENSMUSG00000097313	Gm26569	1.677	0.176
ENSMUSG00000097675	1700101I11Rik	1.676	0.17
ENSMUSG00000042659	Arrdc4	1.674	2.16e-08
ENSMUSG00000055862	Izumo4	1.674	2.41e-05
ENSMUSG00000078485	Plekhn1	1.673	1.89e-10
ENSMUSG00000078350	Smim1	1.672	1.15e-06
ENSMUSG00000038775	Vill	1.669	3.69e-05
ENSMUSG00000063558	Aox1	1.669	0.273
ENSMUSG00000036002	Fam214b	1.668	3.35e-32
ENSMUSG00000075014	Gm10800	1.668	0.173
ENSMUSG00000026489	Adck3	1.666	0.0122
ENSMUSG00000087141	Plcxd2	1.665	1.15e-42
ENSMUSG00000022148	Fyb	1.663	0.0642
ENSMUSG00000034837	Gnat1	1.662	0.301
ENSMUSG00000027071	P2rx3	1.659	0.289
ENSMUSG00000051669	AU021092	1.658	8.2e-05
ENSMUSG00000011751	Sptbn4	1.657	0.00287
ENSMUSG00000038600	Atp6v0a4	1.657	0.00826
ENSMUSG00000064373	Sepp1	1.657	0.000145
ENSMUSG00000000093	Tbx2	1.656	0.0104
ENSMUSG00000050671	Ism2	1.656	0.00048
ENSMUSG00000023868	Pde10a	1.655	0.118
ENSMUSG00000018774	Cd68	1.654	6.3e-15
ENSMUSG00000025002	Cyp2c55	1.654	0.231
ENSMUSG00000029206	Nsun7	1.654	0.0845
ENSMUSG00000049493	Pls1	1.654	0.00108
ENSMUSG00000039376	Synpo2l	1.653	4.57e-05
ENSMUSG00000002831	Plin4	1.652	0.0105
ENSMUSG00000082265	Gm15547	1.652	0.592
ENSMUSG00000040327	Cul9	1.651	0.166
ENSMUSG00000053030	Spink2	1.651	0.145
ENSMUSG00000060240	Cend1	1.65	0.000171
ENSMUSG00000074817	Papolb	1.65	0.000314
ENSMUSG00000073600	Prob1	1.649	2.8e-05
ENSMUSG00000015812	Gnrh1	1.648	0.0227
ENSMUSG00000024846	Cst6	1.647	0.0161
ENSMUSG00000062309	Rpp25	1.644	0.107
ENSMUSG00000024338	Psmb8	1.643	0.179
ENSMUSG00000020887	A230052G05Rik	1.641	0.566
ENSMUSG00000025498	Irf7	1.639	0.000253
ENSMUSG00000049649	Gpr3	1.639	0.132
ENSMUSG00000027412	Lpin3	1.634	2.93e-05
ENSMUSG00000034209	Rasl10a	1.634	0.000209
ENSMUSG00000020641	Rsad2	1.632	0.207
ENSMUSG00000042817	Flt3	1.631	0.0229
ENSMUSG00000086389	Gm15998	1.631	1.68e-05
ENSMUSG00000040557	Wbscr27	1.629	3.4e-16
ENSMUSG00000043972	Opn5	1.626	0.19
ENSMUSG00000102496	Gm36989	1.626	0.109
ENSMUSG00000079499	6530402F18Rik	1.622	0.128
ENSMUSG00000049699	Ucn2	1.621	0.0777
ENSMUSG00000103133	Gm37303	1.621	0.426
ENSMUSG00000085147	Gm12609	1.619	0.254
ENSMUSG00000032596	Uba7	1.618	0.0166
ENSMUSG00000072884	Gm10433	1.616	0.348
ENSMUSG00000050821	Fam131a	1.615	1.62e-09
ENSMUSG00000020108	Ddit4	1.614	1.54e-29
ENSMUSG00000003271	Sult2b1	1.612	0.000193
ENSMUSG00000019737	Syne4	1.611	0.0233
ENSMUSG00000085495	Gm16796	1.61	0.241
ENSMUSG00000020083	2010107G23Rik	1.607	0.05
ENSMUSG00000103569	Gm38067	1.607	0.212
ENSMUSG00000059554	Ccdc28a	1.604	6.78e-13
ENSMUSG00000038146	Notch3	1.601	2.74e-08
ENSMUSG00000073888	Ccl27a	1.6	0.143
ENSMUSG00000067203	H2-K2	1.598	0.0827
ENSMUSG00000074794	Arrdc3	1.598	5.06e-54
ENSMUSG00000106025	RP23-453M11.4	1.598	0.418
ENSMUSG00000070524	Fcrlb	1.597	0.387
ENSMUSG00000072893	4933439C10Rik	1.597	8.99e-22
ENSMUSG00000030707	Coro1a	1.596	6.57e-06
ENSMUSG00000104597	RP24-68G17.4	1.594	0.38
ENSMUSG00000027983	Cyp2u1	1.592	5.2e-06
ENSMUSG00000041132	N4bp2l1	1.592	3.21e-08
ENSMUSG00000024610	Cd74	1.591	0.0929
ENSMUSG00000024803	Ankrd1	1.587	9.75e-17
ENSMUSG00000041605	5730559C18Rik	1.587	0.00198
ENSMUSG00000045625	Pigz	1.587	0.325
ENSMUSG00000044041	Krt13	1.586	0.032
ENSMUSG00000042156	Dzip1	1.585	2.83e-49
ENSMUSG00000024049	Myom1	1.583	0.0184
ENSMUSG00000059089	Fcgr4	1.583	0.307
ENSMUSG00000074629	4930518I15Rik	1.583	0.0188
ENSMUSG00000028167	Bdh2	1.581	0.177
ENSMUSG00000023034	Nr4a1	1.579	4.57e-05
ENSMUSG00000028931	Kcnab2	1.579	1.9e-05
ENSMUSG00000078452	Raet1d	1.579	5.34e-10
ENSMUSG00000026819	Slc25a25	1.577	4.83e-49
ENSMUSG00000081137	BC022960	1.577	2.41e-07
ENSMUSG00000086943	4732414G09Rik	1.576	0.432
ENSMUSG00000078872	Gm14401	1.575	0.161
ENSMUSG00000102854	C130023A14Rik	1.573	0.335
ENSMUSG00000023473	Celsr3	1.569	0.302
ENSMUSG00000105742	RP24-347B12.1	1.569	0.26
ENSMUSG00000079654	Prrt4	1.568	0.265
ENSMUSG00000048096	Lmod1	1.566	0.085
ENSMUSG00000042622	Maff	1.565	3.84e-71
ENSMUSG00000022997	Wnt1	1.564	0.144
ENSMUSG00000057880	Abat	1.563	0.177
ENSMUSG00000028950	Tas1r1	1.562	0.0273
ENSMUSG00000105552	RP23-114P22.5	1.562	0.024
ENSMUSG00000020340	Cyfip2	1.56	0.0858
ENSMUSG00000020656	Grhl1	1.558	0.0192
ENSMUSG00000022580	Rhpn1	1.557	1.63e-06
ENSMUSG00000052726	Kcnt2	1.557	0.215
ENSMUSG00000085311	Gm15445	1.557	0.426
ENSMUSG00000022332	Khdrbs3	1.556	0.047
ENSMUSG00000015134	Aldh1a3	1.555	0.206
ENSMUSG00000022096	Hr	1.555	2.14e-27
ENSMUSG00000026893	Gca	1.554	0.269
ENSMUSG00000032754	Slc8b1	1.552	2.5e-14
ENSMUSG00000054619	Mettl7a1	1.552	1.44e-05
ENSMUSG00000042106	Fam212a	1.549	0.000526
ENSMUSG00000053040	Aph1c	1.549	0.00273
ENSMUSG00000022102	Dok2	1.548	0.158
ENSMUSG00000028328	Tmod1	1.548	0.125
ENSMUSG00000064901	Snora21	1.545	0.214
ENSMUSG00000097731	2700016F22Rik	1.545	0.264
ENSMUSG00000027801	Tm4sf4	1.544	0.28
ENSMUSG00000097699	5430400D12Rik	1.543	0.284
ENSMUSG00000025064	Col17a1	1.542	0.289
ENSMUSG00000056771	Gm10010	1.54	0.317
ENSMUSG00000097145	9230114K14Rik	1.54	2.23e-08
ENSMUSG00000084203	Gm15593	1.539	0.33
ENSMUSG00000103543	Gm37669	1.539	0.356
ENSMUSG00000042417	Ccno	1.538	0.00232
ENSMUSG00000107709	RP23-20L3.2	1.538	0.103
ENSMUSG00000047250	Ptgs1	1.536	1.56e-14
ENSMUSG00000100813	Gm28874	1.533	0.26
ENSMUSG00000102704	Gm38309	1.533	0.286
ENSMUSG00000045275	Lca5l	1.532	0.272
ENSMUSG00000104667	RP24-418J2.5	1.532	0.154
ENSMUSG00000037577	Ephx3	1.531	0.163
ENSMUSG00000037664	Cdkn1c	1.531	0.0827
ENSMUSG00000021922	Itih4	1.529	0.0466
ENSMUSG00000040345	Arhgap9	1.529	0.00232
ENSMUSG00000036067	Slc2a6	1.528	4.43e-15
ENSMUSG00000039099	Wdr93	1.528	0.307
ENSMUSG00000091898	Tnnc1	1.528	0.00344
ENSMUSG00000097056	Gm4262	1.528	6.11e-05
ENSMUSG00000005681	Apoa2	1.527	0.142
ENSMUSG00000029633	Gm5578	1.527	0.14
ENSMUSG00000052783	Grk4	1.527	8.68e-05
ENSMUSG00000105699	RP23-462C22.5	1.526	0.0681
ENSMUSG00000085564	Gm12198	1.525	0.312
ENSMUSG00000027315	Spint1	1.524	0.00645
ENSMUSG00000083964	Gm14122	1.522	0.245
ENSMUSG00000028341	Nr4a3	1.521	0.00156
ENSMUSG00000022099	Dmtn	1.52	3.45e-05
ENSMUSG00000097261	4930532G15Rik	1.52	0.194
ENSMUSG00000005951	Shpk	1.519	3.18e-05
ENSMUSG00000029851	Tcaf2	1.519	0.00438
ENSMUSG00000073460	Pnldc1	1.519	0.00925
ENSMUSG00000061758	Akr1b10	1.518	0.000911
ENSMUSG00000028893	Sesn2	1.517	1.68e-46
ENSMUSG00000074796	Slc4a11	1.517	3.25e-17
ENSMUSG00000025723	Nmb	1.516	0.0884
ENSMUSG00000042793	Lgr6	1.515	5.19e-08
ENSMUSG00000074064	Mlycd	1.514	3.68e-07
ENSMUSG00000079547	H2-DMb1	1.513	2.51e-06
ENSMUSG00000086681	Gm16178	1.51	0.196
ENSMUSG00000035373	Ccl7	1.509	0.000358
ENSMUSG00000038217	Tlcd2	1.509	0.0032
ENSMUSG00000025176	Hoga1	1.508	1.13e-07
ENSMUSG00000034858	Fam214a	1.508	4.77e-12
ENSMUSG00000039450	Dcxr	1.507	1.18e-15
ENSMUSG00000038009	Dnajc22	1.506	0.000501
ENSMUSG00000028635	Edn2	1.505	0.0283
ENSMUSG00000097150	Gm26513	1.505	0.0421
ENSMUSG00000019194	Scn1b	1.504	3.31e-06
ENSMUSG00000024235	Map3k8	1.502	1.08e-06
ENSMUSG00000053581	Zfand2a	1.502	4.14e-54
ENSMUSG00000014905	Dnajb9	1.499	2.42e-28
ENSMUSG00000053442	4930597O21Rik	1.499	0.265
ENSMUSG00000023960	Enpp5	1.497	2.37e-09
ENSMUSG00000105572	RP23-235E15.5	1.495	0.165
ENSMUSG00000045007	Tubg2	1.493	0.213
ENSMUSG00000039508	Fam26d	1.488	0.0488
ENSMUSG00000019734	Tmc4	1.486	0.038
ENSMUSG00000025221	Kcnip2	1.485	0.476
ENSMUSG00000033213	AA467197	1.485	0.158
ENSMUSG00000038569	Rad9b	1.483	0.0012
ENSMUSG00000034171	Faah	1.48	0.00437
ENSMUSG00000040562	Gstm2	1.479	1.89e-10
ENSMUSG00000044719	E230025N22Rik	1.479	0.0363
ENSMUSG00000071042	Rasgrp3	1.479	1.82e-08
ENSMUSG00000028845	Tekt2	1.478	0.0439
ENSMUSG00000038776	Ephx1	1.478	4.03e-10
ENSMUSG00000078126	Rpl23a-ps3	1.477	0.404
ENSMUSG00000063767	S100a7a	1.475	5.9e-17
ENSMUSG00000021876	Rnase4	1.473	2.34e-19
ENSMUSG00000052384	Nrros	1.473	0.0589
ENSMUSG00000106820	RP24-544J6.4	1.471	0.205
ENSMUSG00000029153	Ociad2	1.47	0.0326
ENSMUSG00000074264	Amy1	1.47	0.335
ENSMUSG00000086728	Man2c1os	1.47	0.0956
ENSMUSG00000097747	Gm26534	1.469	0.165
ENSMUSG00000022847	Thpo	1.468	0.000234
ENSMUSG00000087203	Gm13986	1.468	0.0901
ENSMUSG00000097327	E030030I06Rik	1.468	0.00934
ENSMUSG00000105402	RP24-448C16.7	1.467	0.000226
ENSMUSG00000014846	Tppp3	1.466	0.00898
ENSMUSG00000063889	Crem	1.466	1.25e-15
ENSMUSG00000097885	5031434O11Rik	1.466	0.00889
ENSMUSG00000027171	Prrg4	1.464	0.0233
ENSMUSG00000040428	Plekha4	1.464	0.000426
ENSMUSG00000041775	Mapk1ip1	1.464	4.8e-07
ENSMUSG00000018470	Kcnab3	1.463	8.27e-16
ENSMUSG00000040703	Cyp2s1	1.462	0.231
ENSMUSG00000061510	Gm10101	1.462	0.00699
ENSMUSG00000040498	Igsf23	1.461	0.185
ENSMUSG00000074826	Gm10767	1.46	0.03
ENSMUSG00000025207	Sema4g	1.459	2.54e-06
ENSMUSG00000096923	A730071L15Rik	1.458	0.22
ENSMUSG00000000627	Sema4f	1.457	9.34e-05
ENSMUSG00000028337	Coro2a	1.457	2.34e-14
ENSMUSG00000043126	D830039M14Rik	1.454	0.177
ENSMUSG00000084076	Gm14600	1.454	0.224
ENSMUSG00000001227	Sema6b	1.453	0.00051
ENSMUSG00000026736	4930426L09Rik	1.453	0.264
ENSMUSG00000097164	Cep83os	1.453	0.000798
ENSMUSG00000010362	Rdm1	1.45	6.17e-13
ENSMUSG00000039742	Fam71f1	1.449	2.53e-06
ENSMUSG00000084968	Gm12743	1.449	0.0602
ENSMUSG00000025408	Ddit3	1.448	3.33e-48
ENSMUSG00000028015	Ctso	1.448	0.00589
ENSMUSG00000036564	Ndrg4	1.445	1.83e-73
ENSMUSG00000006435	Neurl1a	1.444	1.25e-05
ENSMUSG00000030720	Cln3	1.444	0.000136
ENSMUSG00000032968	Inha	1.444	0.0168
ENSMUSG00000018143	Mafk	1.441	2.77e-98
ENSMUSG00000025666	Tmem47	1.441	0.0238
ENSMUSG00000028555	Ttc39a	1.441	0.0166
ENSMUSG00000027612	Mmp24	1.439	0.0133
ENSMUSG00000032062	2310030G06Rik	1.439	0.203
ENSMUSG00000038630	Zkscan16	1.439	0.26
ENSMUSG00000097125	Gm26885	1.438	0.278
ENSMUSG00000025328	Padi3	1.436	0.33
ENSMUSG00000027544	Nfatc2	1.435	0.11
ENSMUSG00000030882	Dnhd1	1.435	0.00229
ENSMUSG00000102526	Gm37785	1.435	0.216
ENSMUSG00000053964	Lgals4	1.434	0.203
ENSMUSG00000096883	Shisa8	1.434	0.345
ENSMUSG00000095315	Gm10130	1.433	0.267
ENSMUSG00000050592	Fam78a	1.432	0.467
ENSMUSG00000018411	Mapt	1.43	0.172
ENSMUSG00000049892	Rasd1	1.43	0.0814
ENSMUSG00000040483	Xaf1	1.428	0.0525
ENSMUSG00000064115	Cadm2	1.428	0.109
ENSMUSG00000024084	Qpct	1.426	2.6e-07
ENSMUSG00000030165	Klrd1	1.426	0.249
ENSMUSG00000044083	Efcab8	1.423	0.264
ENSMUSG00000051124	Gimap9	1.422	0.33
ENSMUSG00000090150	Acad11	1.421	8.9e-19
ENSMUSG00000087060	Eldr	1.42	1.67e-13
ENSMUSG00000087400	Gm15270	1.418	0.0018
ENSMUSG00000022537	Tmem44	1.414	0.00651
ENSMUSG00000002108	Nr1h3	1.413	0.259
ENSMUSG00000030739	Myh14	1.412	0.142
ENSMUSG00000039063	Echdc3	1.412	1.65e-07
ENSMUSG00000081565	Rps12-ps5	1.41	0.383
ENSMUSG00000027834	Serpini1	1.409	7.53e-07
ENSMUSG00000010492	Uckl1os	1.408	0.0402
ENSMUSG00000031480	Thsd1	1.408	5.76e-06
ENSMUSG00000031860	Pbx4	1.406	9.89e-09
ENSMUSG00000035285	Nat14	1.405	0.0273
ENSMUSG00000097013	Gm26710	1.405	0.0383
ENSMUSG00000036764	Dnajc12	1.403	2.32e-09
ENSMUSG00000043531	Sorcs1	1.403	0.251
ENSMUSG00000027713	1810062G17Rik	1.4	0.00593
ENSMUSG00000033717	Adra2a	1.4	0.334
ENSMUSG00000063919	Srrm4	1.4	1.78e-17
ENSMUSG00000023571	Fam132a	1.399	0.00128
ENSMUSG00000001588	Acap1	1.397	0.000743
ENSMUSG00000027386	Fbln7	1.397	0.0189
ENSMUSG00000075312	Gm13597	1.397	0.237
ENSMUSG00000006403	Adamts4	1.396	1.31e-13
ENSMUSG00000021265	Slc25a29	1.396	5.99e-05
ENSMUSG00000083674	Zfp133-ps	1.395	0.333
ENSMUSG00000038264	Sema7a	1.393	5.69e-15
ENSMUSG00000006218	Fam131c	1.392	0.0573
ENSMUSG00000024486	Hbegf	1.391	6.9e-37
ENSMUSG00000040247	Tbc1d10c	1.391	0.0116
ENSMUSG00000018752	Tnfsfm13	1.387	5.04e-06
ENSMUSG00000103983	Gm20045	1.386	0.000111
ENSMUSG00000097243	Gm26908	1.384	0.407
ENSMUSG00000029377	Ereg	1.383	5.26e-42
ENSMUSG00000049515	Espnl	1.382	0.00379
ENSMUSG00000017692	Rhbdl3	1.381	0.365
ENSMUSG00000029605	Oas1b	1.38	0.19
ENSMUSG00000033152	Podxl2	1.38	8.14e-05
ENSMUSG00000037337	Map4k1	1.38	6.58e-10
ENSMUSG00000046719	Nxph3	1.38	0.389
ENSMUSG00000102912	Gm20731	1.38	0.252
ENSMUSG00000030717	Nupr1	1.377	4.85e-54
ENSMUSG00000027894	Slc6a17	1.376	0.143
ENSMUSG00000056476	Med12l	1.375	0.0681
ENSMUSG00000052387	Trpm3	1.374	0.0566
ENSMUSG00000016028	Celsr1	1.373	0.0446
ENSMUSG00000026435	Slc45a3	1.372	0.000985
ENSMUSG00000021990	Spata13	1.369	0.000171
ENSMUSG00000060034	Ctf2	1.369	0.385
ENSMUSG00000017943	Gdap1l1	1.368	0.365
ENSMUSG00000034855	Cxcl10	1.366	1.21e-21
ENSMUSG00000034245	Hdac11	1.365	0.00236
ENSMUSG00000044786	Zfp36	1.364	5.39e-26
ENSMUSG00000020072	Pbld2	1.363	0.105
ENSMUSG00000047604	Frat2	1.363	3.24e-14
ENSMUSG00000066975	Cryba4	1.363	0.208
ENSMUSG00000087442	Gm14453	1.363	0.177
ENSMUSG00000019320	Noxo1	1.362	0.0745
ENSMUSG00000040713	Creg1	1.362	1.36e-16
ENSMUSG00000044934	Zfp367	1.36	7.43e-58
ENSMUSG00000097000	Gm17435	1.36	9.51e-06
ENSMUSG00000025880	Smad7	1.359	2.48e-42
ENSMUSG00000022199	Slc22a17	1.358	0.365
ENSMUSG00000085169	Gm10785	1.358	0.00647
ENSMUSG00000097773	Gm10614	1.357	0.353
ENSMUSG00000070345	Hsf5	1.355	0.425
ENSMUSG00000097537	2610020C07Rik	1.355	2.04e-07
ENSMUSG00000102813	Gm37795	1.355	0.00481
ENSMUSG00000005774	Rfx5	1.354	8.79e-32
ENSMUSG00000002983	Relb	1.353	2.04e-45
ENSMUSG00000085636	Gm11769	1.353	0.115
ENSMUSG00000087639	Gm15512	1.353	0.264
ENSMUSG00000021403	Serpinb9b	1.352	3.54e-08
ENSMUSG00000074357	AA386476	1.351	0.118
ENSMUSG00000022562	Oplah	1.349	0.000383
ENSMUSG00000043644	0610009L18Rik	1.349	0.0704
ENSMUSG00000038742	Angptl6	1.348	0.0145
ENSMUSG00000047810	Ccdc88b	1.348	0.155
ENSMUSG00000005986	Ankrd13d	1.347	3.6e-12
ENSMUSG00000002043	Trappc6a	1.345	1.91e-13
ENSMUSG00000042851	Zc3h6	1.345	1.76e-05
ENSMUSG00000074227	Spint2	1.345	0.477
ENSMUSG00000103400	Gm15853	1.343	0.0176
ENSMUSG00000072770	Acrbp	1.342	0.00563
ENSMUSG00000100505	Gm13283	1.339	0.211
ENSMUSG00000087221	BC037032	1.338	0.0786
ENSMUSG00000045345	9530056K15Rik	1.337	0.0299
ENSMUSG00000010311	Optc	1.336	0.407
ENSMUSG00000049907	Rasl11b	1.333	0.0133
ENSMUSG00000069713	4933406P04Rik	1.333	0.144
ENSMUSG00000031618	Nr3c2	1.332	0.119
ENSMUSG00000036964	Trim17	1.331	0.23
ENSMUSG00000026399	Cd55	1.33	0.312
ENSMUSG00000097093	C330013E15Rik	1.328	0.09
ENSMUSG00000074219	Gm10644	1.327	0.000483
ENSMUSG00000079608	Stard6	1.327	0.0476
ENSMUSG00000022456	Sept3	1.326	1.93e-05
ENSMUSG00000085143	Gm11520	1.325	0.015
ENSMUSG00000003541	Ier3	1.324	5.88e-53
ENSMUSG00000029223	Uchl1	1.324	2.12e-10
ENSMUSG00000049100	Pcdh10	1.324	0.0091
ENSMUSG00000107216	RP23-353L10.2	1.324	0.279
ENSMUSG00000078853	Igtp	1.323	0.000163
ENSMUSG00000085826	Gm15638	1.322	0.354
ENSMUSG00000102881	Gm3807	1.322	0.282
ENSMUSG00000025359	Pmel	1.32	0.0266
ENSMUSG00000035694	Caps2	1.319	0.215
ENSMUSG00000059326	Csf2ra	1.319	0.00646
ENSMUSG00000068299	1700019G17Rik	1.319	0.239
ENSMUSG00000084145	Gm12263	1.319	0.0234
ENSMUSG00000002111	Spi1	1.318	0.397
ENSMUSG00000026748	Plxdc2	1.317	2.76e-06
ENSMUSG00000046807	Lrrc75b	1.316	8.72e-05
ENSMUSG00000085255	Taco1os	1.315	0.263
ENSMUSG00000020836	Coro6	1.314	6.12e-06
ENSMUSG00000027068	Dhrs9	1.314	0.000225
ENSMUSG00000077212	Snord69	1.313	0.277
ENSMUSG00000085612	Gm15868	1.312	0.336
ENSMUSG00000100720	Gm10075	1.31	0.311
ENSMUSG00000049871	Nlrc3	1.309	5.72e-10
ENSMUSG00000076846	Trav13-2	1.305	0.432
ENSMUSG00000031896	Ctrl	1.303	0.181
ENSMUSG00000040265	Dnm3	1.303	0.314
ENSMUSG00000096647	Gm6223	1.303	0.0951
ENSMUSG00000031709	Tbc1d9	1.302	1.65e-10
ENSMUSG00000097791	Gm17315	1.302	0.00312
ENSMUSG00000047528	Als2cr12	1.301	0.152
ENSMUSG00000097523	1700022N22Rik	1.301	0.202
ENSMUSG00000040998	Npnt	1.3	8.56e-15
ENSMUSG00000027603	Ggt7	1.299	9.44e-11
ENSMUSG00000004952	Rasa4	1.297	1.84e-12
ENSMUSG00000020620	Abca8b	1.297	0.102
ENSMUSG00000024014	Pim1	1.297	6.98e-30
ENSMUSG00000026649	Cfap126	1.297	0.103
ENSMUSG00000084862	Gm16278	1.297	0.0565
ENSMUSG00000107068	Pagr1a	1.296	0.196
ENSMUSG00000009246	Trpm5	1.295	0.22
ENSMUSG00000074881	Mageb3	1.294	0.0959
ENSMUSG00000085875	Gm12905	1.293	0.0286
ENSMUSG00000087305	A430035B10Rik	1.293	0.255
ENSMUSG00000016206	H2-M3	1.292	0.00764
ENSMUSG00000025610	Map3k7cl	1.292	0.117
ENSMUSG00000028108	Ecm1	1.291	5.46e-57
ENSMUSG00000009394	Syn2	1.29	0.244
ENSMUSG00000041180	Hectd2	1.29	0.166
ENSMUSG00000053208	Kat2b-ps	1.29	0.542
ENSMUSG00000070997	1700055D18Rik	1.289	0.0551
ENSMUSG00000021070	Bdkrb2	1.287	0.175
ENSMUSG00000043541	Casc1	1.286	0.181
ENSMUSG00000099583	Hist1h3d	1.286	0.248
ENSMUSG00000100826	Snhg14	1.285	0.0416
ENSMUSG00000026621	Marc1	1.284	0.341
ENSMUSG00000037887	Dusp8	1.284	4.56e-46
ENSMUSG00000020732	Rab37	1.283	0.275
ENSMUSG00000030089	Slc41a3	1.283	4.25e-07
ENSMUSG00000042675	Ypel3	1.282	2.78e-13
ENSMUSG00000097448	Platr22	1.282	0.052
ENSMUSG00000082082	Gm13230	1.281	0.0348
ENSMUSG00000002032	Tmem25	1.28	0.0665
ENSMUSG00000041000	Trim62	1.279	0.00649
ENSMUSG00000036019	Tmtc2	1.278	0.345
ENSMUSG00000068854	Hist2h2be	1.278	7.43e-06
ENSMUSG00000037649	H2-DMa	1.277	0.0642
ENSMUSG00000053334	Ficd	1.277	1.19e-09
ENSMUSG00000070604	Vsig10l	1.277	0.0415
ENSMUSG00000028803	Nipal3	1.275	8.01e-05
ENSMUSG00000106426	RP23-455E11.1	1.275	0.235
ENSMUSG00000039461	Tcta	1.273	7.81e-12
ENSMUSG00000021025	Nfkbia	1.272	9.69e-55
ENSMUSG00000029601	Iqcd	1.271	0.117
ENSMUSG00000039787	Cercam	1.269	1.71e-11
ENSMUSG00000096995	2810029C07Rik	1.269	0.00211
ENSMUSG00000001156	Mxd1	1.267	2.6e-16
ENSMUSG00000022479	Vdr	1.267	0.0594
ENSMUSG00000085667	Gm12992	1.267	0.016
ENSMUSG00000030917	Tmem159	1.266	0.203
ENSMUSG00000045667	Smtnl2	1.264	0.182
ENSMUSG00000023806	Rsph3b	1.263	0.0014
ENSMUSG00000031297	Slc7a3	1.263	0.00821
ENSMUSG00000032372	Plscr2	1.263	5.06e-05
ENSMUSG00000021763	BC067074	1.262	0.175
ENSMUSG00000103367	Gm38158	1.262	0.0028
ENSMUSG00000063268	Parp10	1.26	1.54e-16
ENSMUSG00000078607	1810010H24Rik	1.26	0.171
ENSMUSG00000085148	Mir22hg	1.26	2.21e-13
ENSMUSG00000023284	Zfp605	1.259	0.0286
ENSMUSG00000024180	Tmem8	1.259	6.33e-11
ENSMUSG00000027438	Napb	1.259	8.25e-10
ENSMUSG00000051890	Klhdc1	1.258	4.16e-05
ENSMUSG00000027435	Cd93	1.257	0.00181
ENSMUSG00000091515	Zfp422-rs1	1.257	0.0143
ENSMUSG00000011256	Adam19	1.254	6.26e-13
ENSMUSG00000038180	Spag4	1.254	4.45e-08
ENSMUSG00000070336	Fbxo47	1.254	0.00754
ENSMUSG00000038903	Ccdc68	1.252	0.14
ENSMUSG00000103440	Gm37131	1.252	0.172
ENSMUSG00000025855	Prkar1b	1.251	0.248
ENSMUSG00000025220	Mgea5	1.25	2.85e-61
ENSMUSG00000054099	Slc25a40	1.25	6.08e-27
ENSMUSG00000035456	Prdm8	1.249	0.505
ENSMUSG00000105895	RP23-407I6.2	1.248	0.357
ENSMUSG00000001665	Gstt3	1.247	8.36e-05
ENSMUSG00000039672	Kcne2	1.247	0.446
ENSMUSG00000067889	Sptbn2	1.245	0.158
ENSMUSG00000003585	Sec14l2	1.244	0.000148
ENSMUSG00000027676	Ccdc39	1.244	0.00252
ENSMUSG00000029279	Brdt	1.244	0.00898
ENSMUSG00000039814	Xkr5	1.243	0.246
ENSMUSG00000034795	Ccdc122	1.242	1.97e-09
ENSMUSG00000043773	1700048O20Rik	1.242	1.18e-06
ENSMUSG00000058385	Hist1h2bg	1.238	0.237
ENSMUSG00000062310	Glrp1	1.238	0.317
ENSMUSG00000011267	Zfp296	1.237	0.0006
ENSMUSG00000027611	Procr	1.237	2.12e-35
ENSMUSG00000017969	Ptgis	1.236	0.375
ENSMUSG00000035936	Aldh5a1	1.236	3.87e-08
ENSMUSG00000075410	Gm11744	1.236	0.451
ENSMUSG00000085566	A730017L22Rik	1.235	1.42e-07
ENSMUSG00000039782	Cpeb2	1.234	7.49e-18
ENSMUSG00000001763	Tspan33	1.233	0.165
ENSMUSG00000025739	Gng13	1.233	0.367
ENSMUSG00000104917	RP23-477N9.2	1.233	0.394
ENSMUSG00000092247	Gm20426	1.232	0.337
ENSMUSG00000003341	Atp8b3	1.231	0.0735
ENSMUSG00000022679	Mpv17l	1.231	0.000619
ENSMUSG00000055421	Pcdh9	1.231	0.367
ENSMUSG00000103898	Gm30238	1.231	0.0496
ENSMUSG00000044966	Fbxo48	1.23	1.33e-09
ENSMUSG00000078838	Gm17382	1.23	0.321
ENSMUSG00000038074	Fkbp14	1.229	5.6e-09
ENSMUSG00000061882	Ccdc62	1.229	0.107
ENSMUSG00000062515	Fabp4	1.229	0.00278
ENSMUSG00000107499	Ccdc142	1.225	0.243
ENSMUSG00000034614	Pik3ip1	1.224	7.27e-05
ENSMUSG00000061718	Ppp1r1b	1.224	0.0972
ENSMUSG00000085628	Appbp2os	1.224	0.292
ENSMUSG00000073437	D330041H03Rik	1.223	0.000172
ENSMUSG00000090698	Apold1	1.222	0.176
ENSMUSG00000071636	Rimbp3	1.221	0.198
ENSMUSG00000097048	1600020E01Rik	1.221	2.77e-15
ENSMUSG00000028680	Plk3	1.22	3.19e-27
ENSMUSG00000032712	2810474O19Rik	1.22	1.94e-52
ENSMUSG00000106981	RP23-425N12.2	1.218	0.31
ENSMUSG00000018387	Shroom1	1.217	0.000339
ENSMUSG00000038692	Hoxb4	1.217	7.49e-08
ENSMUSG00000060923	Acyp2	1.217	0.321
ENSMUSG00000023094	Msrb2	1.216	0.293
ENSMUSG00000021701	Plk2	1.215	6.38e-73
ENSMUSG00000026840	Lamc3	1.214	0.047
ENSMUSG00000038143	Stox2	1.214	0.506
ENSMUSG00000057706	Mex3b	1.214	2.73e-22
ENSMUSG00000023755	Rhebl1	1.213	1.41e-10
ENSMUSG00000086308	G630016G05Rik	1.213	0.364
ENSMUSG00000054293	A630033H20Rik	1.212	0.00377
ENSMUSG00000073627	C130036L24Rik	1.212	0.00282
ENSMUSG00000087381	Gm16008	1.212	0.21
ENSMUSG00000025225	Nfkb2	1.211	2.71e-78
ENSMUSG00000071715	Ncf4	1.21	0.366
ENSMUSG00000000876	Pxmp4	1.209	1.78e-17
ENSMUSG00000108037	RP24-503A2.6	1.208	0.22
ENSMUSG00000090564	A430057M04Rik	1.207	0.00531
ENSMUSG00000006356	Crip2	1.206	2.14e-24
ENSMUSG00000048249	Crebrf	1.206	5.55e-27
ENSMUSG00000010067	Rassf1	1.205	3.45e-32
ENSMUSG00000035184	Fam124a	1.205	0.000978
ENSMUSG00000085269	Gm15777	1.205	0.453
ENSMUSG00000023031	Cela1	1.204	0.0468
ENSMUSG00000031026	Trim66	1.204	0.102
ENSMUSG00000044716	Dok7	1.201	0.0289
ENSMUSG00000097651	4930461G14Rik	1.2	0.25
ENSMUSG00000015890	Amdhd1	1.198	0.522
ENSMUSG00000035697	Hmha1	1.198	0.00186
ENSMUSG00000074657	Kif5a	1.198	0.00162
ENSMUSG00000021066	Atl1	1.195	0.0116
ENSMUSG00000039763	Dnajc28	1.195	3.13e-06
ENSMUSG00000027173	Depdc7	1.194	5.02e-13
ENSMUSG00000033107	Rnf125	1.194	0.249
ENSMUSG00000056735	A930024E05Rik	1.194	0.127
ENSMUSG00000104043	Gm6525	1.194	0.0912
ENSMUSG00000038700	Hoxb5	1.193	0.226
ENSMUSG00000056185	Snx32	1.193	2.52e-08
ENSMUSG00000097734	B930082K07Rik	1.193	0.114
ENSMUSG00000097567	Gm26637	1.192	0.157
ENSMUSG00000097890	4930547M16Rik	1.192	0.357
ENSMUSG00000025262	Fam120c	1.191	0.000704
ENSMUSG00000028100	Nudt17	1.191	0.00796
ENSMUSG00000051736	Fam229b	1.191	0.00595
ENSMUSG00000086342	Gm12932	1.191	0.312
ENSMUSG00000024885	Aldh3b1	1.189	1.17e-05
ENSMUSG00000040128	Pnrc1	1.189	9.41e-42
ENSMUSG00000057897	Camk2b	1.189	0.000127
ENSMUSG00000030287	Itpr2	1.188	0.000465
ENSMUSG00000074604	Mgst2	1.188	0.424
ENSMUSG00000085178	Kdm6bos	1.188	0.317
ENSMUSG00000022773	Ypel1	1.187	0.0175
ENSMUSG00000070031	Sp140	1.187	0.406
ENSMUSG00000002346	Slc25a42	1.186	1.24e-14
ENSMUSG00000063535	Zfp773	1.185	0.495
ENSMUSG00000049588	Ccdc69	1.184	0.131
ENSMUSG00000009654	Oit3	1.183	0.0775
ENSMUSG00000014361	Mertk	1.183	0.174
ENSMUSG00000036995	Asap3	1.183	5.19e-06
ENSMUSG00000043870	Gm5809	1.183	0.441
ENSMUSG00000008540	Mgst1	1.182	0.0198
ENSMUSG00000021256	Vash1	1.182	0.102
ENSMUSG00000052143	Gm9869	1.182	0.226
ENSMUSG00000037526	Atg14	1.181	3.57e-19
ENSMUSG00000097812	Gm26812	1.18	0.526
ENSMUSG00000096957	E230013L22Rik	1.179	0.175
ENSMUSG00000097051	Gm26836	1.179	0.602
ENSMUSG00000025507	Pidd1	1.178	5.95e-15
ENSMUSG00000080021	Gm5915	1.178	0.375
ENSMUSG00000024055	Cyp4f13	1.177	0.00749
ENSMUSG00000034258	Mfsd7c	1.177	0.0507
ENSMUSG00000038354	Ankrd35	1.177	0.0651
ENSMUSG00000010660	Plcd1	1.176	1.57e-16
ENSMUSG00000031530	Dusp4	1.176	2.02e-05
ENSMUSG00000099034	2810039B14Rik	1.176	0.0815
ENSMUSG00000031442	Mcf2l	1.174	7.5e-08
ENSMUSG00000032271	Nnmt	1.174	0.147
ENSMUSG00000037868	Egr2	1.174	0.0243
ENSMUSG00000085793	Lin52	1.174	4.26e-12
ENSMUSG00000022596	Slurp1	1.172	0.117
ENSMUSG00000035085	1700020L24Rik	1.172	0.0969
ENSMUSG00000031298	Adgrg2	1.171	0.00355
ENSMUSG00000045761	Fam179a	1.171	0.213
ENSMUSG00000019088	Dnase1l1	1.17	4.93e-13
ENSMUSG00000020175	Rab36	1.17	9.76e-05
ENSMUSG00000038045	Sult6b1	1.17	0.208
ENSMUSG00000086290	Snhg12	1.17	3.74e-24
ENSMUSG00000078606	Gm4070	1.167	0.205
ENSMUSG00000029832	Nfe2l3	1.166	0.11
ENSMUSG00000067780	Pi15	1.163	0.0656
ENSMUSG00000044197	Gpr146	1.162	3.55e-05
ENSMUSG00000031828	Klhl36	1.161	0.112
ENSMUSG00000044916	1700029I15Rik	1.161	0.0883
ENSMUSG00000006784	Ttc25	1.16	0.32
ENSMUSG00000015437	Gzmb	1.16	0.164
ENSMUSG00000026080	Chst10	1.158	0.0388
ENSMUSG00000078495	Gm13157	1.158	0.353
ENSMUSG00000084799	Ino80dos	1.158	0.00424
ENSMUSG00000090173	Fbxw10	1.158	0.197
ENSMUSG00000097353	A430046D13Rik	1.158	0.00879
ENSMUSG00000086392	Mccc1os	1.157	0.446
ENSMUSG00000105356	RP23-480P21.3	1.156	0.167
ENSMUSG00000030486	Zfp108	1.155	0.0641
ENSMUSG00000045868	Gvin1	1.155	0.14
ENSMUSG00000047115	Fam221a	1.155	0.0308
ENSMUSG00000060063	Alox5ap	1.155	0.0317
ENSMUSG00000005950	P2rx5	1.154	0.000263
ENSMUSG00000020135	Apc2	1.154	0.171
ENSMUSG00000032417	Rwdd2a	1.153	0.00211
ENSMUSG00000038521	C1s1	1.153	0.007
ENSMUSG00000046550	Spin2c	1.153	0.0338
ENSMUSG00000101211	Gm28818	1.153	0.396
ENSMUSG00000018500	Adora2b	1.152	0.102
ENSMUSG00000034947	Tmem106a	1.152	1.41e-15
ENSMUSG00000004791	Pgf	1.15	7.16e-06
ENSMUSG00000032000	Birc3	1.15	0.00624
ENSMUSG00000086942	Gm15489	1.15	0.34
ENSMUSG00000071112	Spx	1.149	0.0955
ENSMUSG00000023947	Nfkbie	1.147	6.91e-24
ENSMUSG00000031824	6430548M08Rik	1.147	1.51e-12
ENSMUSG00000037108	Zcwpw1	1.146	1.76e-13
ENSMUSG00000074650	Gm10735	1.146	0.595
ENSMUSG00000034422	Parp14	1.145	0.0256
ENSMUSG00000059430	Actg2	1.145	0.00379
ENSMUSG00000087543	Gm16576	1.145	0.00297
ENSMUSG00000025912	Mybl1	1.144	1.15e-19
ENSMUSG00000079038	D130040H23Rik	1.144	0.338
ENSMUSG00000059456	Ptk2b	1.142	5.74e-11
ENSMUSG00000103804	Gm37062	1.142	0.645
ENSMUSG00000050368	Hoxd10	1.138	0.0553
ENSMUSG00000085995	Gm2788	1.138	0.0919
ENSMUSG00000097265	Gm26803	1.138	0.533
ENSMUSG00000042289	Hsd3b7	1.137	2.26e-14
ENSMUSG00000002083	Bbc3	1.136	1.91e-16
ENSMUSG00000024481	Lvrn	1.136	0.0895
ENSMUSG00000031958	Ldhd	1.136	0.335
ENSMUSG00000046056	Sbsn	1.136	1.11e-10
ENSMUSG00000055991	Zkscan5	1.135	4.51e-29
ENSMUSG00000085376	Gm14508	1.135	0.126
ENSMUSG00000085929	Gm13421	1.133	0.047
ENSMUSG00000001247	Lsr	1.132	0.519
ENSMUSG00000042501	Cpa6	1.132	0.357
ENSMUSG00000079049	Serpinb1c	1.132	0.37
ENSMUSG00000083139	Gm12418	1.132	0.238
ENSMUSG00000086103	Gm11832	1.132	0.307
ENSMUSG00000097217	Gm26549	1.132	0.00589
ENSMUSG00000001349	Cnn1	1.131	0.155
ENSMUSG00000104279	Gm38300	1.131	0.324
ENSMUSG00000020251	Glt8d2	1.13	0.0232
ENSMUSG00000015312	Gadd45b	1.127	8.61e-38
ENSMUSG00000042797	Aqp11	1.127	0.15
ENSMUSG00000092626	9130230N09Rik	1.127	0.148
ENSMUSG00000043243	Fam129c	1.125	0.119
ENSMUSG00000036928	Stag3	1.124	0.115
ENSMUSG00000040495	Chrm4	1.124	0.252
ENSMUSG00000107402	RP23-285C21.7	1.124	0.1
ENSMUSG00000089889	0610040B10Rik	1.123	0.0272
ENSMUSG00000079685	Ulbp1	1.122	1.65e-06
ENSMUSG00000097252	Gm6634	1.122	2.13e-05
ENSMUSG00000009739	Pou6f1	1.121	0.00663
ENSMUSG00000103149	AA914427	1.121	0.3
ENSMUSG00000017412	Cacnb4	1.12	0.443
ENSMUSG00000024818	Slc25a45	1.12	1.51e-06
ENSMUSG00000036256	Igfbp7	1.119	2.32e-17
ENSMUSG00000047342	Zfp286	1.119	0.35
ENSMUSG00000050345	4930486L24Rik	1.119	0.152
ENSMUSG00000035578	Iqcg	1.118	0.0581
ENSMUSG00000036306	Lzts1	1.118	0.426
ENSMUSG00000106022	RP24-277J22.3	1.117	0.353
ENSMUSG00000028517	Ppap2b	1.116	3.11e-09
ENSMUSG00000039632	Ccdc151	1.116	0.217
ENSMUSG00000031538	Plat	1.114	2.04e-13
ENSMUSG00000043391	2510009E07Rik	1.114	0.0779
ENSMUSG00000085655	Gm15952	1.113	0.0988
ENSMUSG00000027796	Smad9	1.112	3.09e-07
ENSMUSG00000096780	Tmem181b-ps	1.112	0.000571
ENSMUSG00000017607	Tns4	1.111	1.53e-13
ENSMUSG00000018427	Ypel2	1.111	3.48e-06
ENSMUSG00000085976	Gm13816	1.11	0.0814
ENSMUSG00000002265	Peg3	1.108	0.451
ENSMUSG00000097784	A430105J06Rik	1.108	0.148
ENSMUSG00000026471	Mr1	1.106	9.83e-05
ENSMUSG00000024854	Pold4	1.105	1.9e-20
ENSMUSG00000025401	Myo1a	1.105	0.119
ENSMUSG00000033644	Piwil2	1.105	0.258
ENSMUSG00000042677	Zc3h12a	1.104	9.04e-10
ENSMUSG00000011589	Fsd1	1.103	4.8e-06
ENSMUSG00000036098	Myrf	1.103	0.000444
ENSMUSG00000048965	Mrgpre	1.103	8.56e-06
ENSMUSG00000010307	Tmem86a	1.102	2.49e-07
ENSMUSG00000035042	Ccl5	1.102	0.0321
ENSMUSG00000052861	Dnah6	1.102	0.657
ENSMUSG00000001270	Ckb	1.1	4.91e-13
ENSMUSG00000018543	1700001P01Rik	1.099	0.431
ENSMUSG00000020300	Cpeb4	1.099	2.11e-24
ENSMUSG00000086754	Gm16098	1.099	0.241
ENSMUSG00000097336	Fendrr	1.099	0.0424
ENSMUSG00000004266	Ptpn6	1.098	3.86e-13
ENSMUSG00000021895	Arhgef3	1.097	3.98e-05
ENSMUSG00000058402	Zfp420	1.097	1.29e-06
ENSMUSG00000034463	Scara3	1.096	0.000533
ENSMUSG00000044056	Efcab9	1.096	0.213
ENSMUSG00000055707	Klhl26	1.096	3.84e-20
ENSMUSG00000097123	Gm6297	1.096	0.215
ENSMUSG00000026110	Mgat4a	1.094	0.138
ENSMUSG00000068551	Zfp467	1.092	0.6
ENSMUSG00000086775	Snhg7os	1.09	0.181
ENSMUSG00000027472	Pdrg1	1.089	5.53e-38
ENSMUSG00000028268	Gbp3	1.089	0.32
ENSMUSG00000030683	Sez6l2	1.089	0.504
ENSMUSG00000039347	Atp6v0e2	1.089	3.28e-05
ENSMUSG00000040420	Cdh18	1.089	0.0377
ENSMUSG00000043639	Rbm20	1.089	0.492
ENSMUSG00000097042	Gm17491	1.089	0.000754
ENSMUSG00000021238	Aldh6a1	1.088	4.3e-08
ENSMUSG00000021725	Parp8	1.087	6.91e-12
ENSMUSG00000041649	Klf8	1.086	0.000363
ENSMUSG00000105692	RP23-350K3.2	1.086	8.7e-15
ENSMUSG00000052373	Mpp3	1.085	0.358
ENSMUSG00000026468	Lhx4	1.083	0.526
ENSMUSG00000040883	Tmem205	1.082	8.37e-06
ENSMUSG00000018604	Tbx3	1.081	0.0146
ENSMUSG00000025450	Gm9752	1.079	0.0111
ENSMUSG00000103103	4833445I07Rik	1.079	0.307
ENSMUSG00000026791	Slc2a8	1.078	4.08e-11
ENSMUSG00000050334	C130071C03Rik	1.078	0.00534
ENSMUSG00000031951	Tmem231	1.075	1.91e-14
ENSMUSG00000087222	E030042O20Rik	1.075	0.388
ENSMUSG00000026255	Efhd1	1.074	0.295
ENSMUSG00000032750	Gab3	1.074	0.303
ENSMUSG00000071637	Cebpd	1.073	2.98e-11
ENSMUSG00000044098	Rsbn1	1.072	4.07e-21
ENSMUSG00000105233	RP23-60D3.3	1.072	0.598
ENSMUSG00000085055	Gm15958	1.071	0.446
ENSMUSG00000046613	Vwa5b2	1.07	0.395
ENSMUSG00000048109	Rbm15	1.07	8.65e-30
ENSMUSG00000020810	Cygb	1.066	0.269
ENSMUSG00000005705	Agrp	1.065	0.563
ENSMUSG00000021234	Fam161b	1.065	0.03
ENSMUSG00000097298	A130057D12Rik	1.065	0.327
ENSMUSG00000097131	D230017M19Rik	1.064	0.0684
ENSMUSG00000101519	Ska2l-ps	1.064	0.337
ENSMUSG00000052031	Tagap1	1.063	4.13e-20
ENSMUSG00000029134	Plb1	1.062	0.0481
ENSMUSG00000037509	Arhgef4	1.062	0.00177
ENSMUSG00000006395	Hyi	1.061	4.82e-09
ENSMUSG00000019960	Dusp6	1.061	4.82e-16
ENSMUSG00000031461	Myom2	1.061	0.058
ENSMUSG00000045031	Cetn4	1.06	0.00896
ENSMUSG00000098134	Rnf113a2	1.06	0.538
ENSMUSG00000026679	Enkur	1.059	0.0221
ENSMUSG00000034391	Fbxo15	1.057	0.427
ENSMUSG00000097418	Gm26667	1.057	0.0459
ENSMUSG00000101599	Gm20342	1.057	0.0184
ENSMUSG00000020062	Slc5a8	1.055	0.207
ENSMUSG00000074818	Pdzd7	1.054	0.121
ENSMUSG00000064215	Ifi27	1.053	4.53e-10
ENSMUSG00000007783	Cpt1c	1.052	1.25e-10
ENSMUSG00000044576	Gareml	1.052	2.87e-05
ENSMUSG00000104719	RP23-431M7.4	1.052	0.156
ENSMUSG00000024887	Asah2	1.051	3.24e-08
ENSMUSG00000032177	Pde4a	1.051	7.16e-18
ENSMUSG00000040859	Bsdc1	1.051	2.07e-32
ENSMUSG00000004933	Matk	1.05	0.0246
ENSMUSG00000097378	B230208H11Rik	1.05	0.0103
ENSMUSG00000040387	Klhl32	1.048	0.27
ENSMUSG00000028020	Glrb	1.047	0.00926
ENSMUSG00000049516	Spty2d1	1.047	3.72e-33
ENSMUSG00000078851	Hist3h2a	1.046	0.000168
ENSMUSG00000024349	Tmem173	1.044	7.19e-21
ENSMUSG00000086841	2410006H16Rik	1.044	1.27e-28
ENSMUSG00000038807	Rap1gap2	1.043	4.48e-17
ENSMUSG00000008318	Relt	1.042	1.55e-12
ENSMUSG00000063364	3300002I08Rik	1.042	0.356
ENSMUSG00000101172	Gm28535	1.042	0.596
ENSMUSG00000102461	Gm37166	1.042	0.391
ENSMUSG00000032514	Ttc21a	1.04	0.378
ENSMUSG00000091514	Gm17484	1.04	0.0395
ENSMUSG00000078922	Tgtp1	1.039	0.408
ENSMUSG00000030337	Vamp1	1.038	2.88e-05
ENSMUSG00000038587	Akap12	1.038	1.37e-09
ENSMUSG00000005045	Chd5	1.037	0.0967
ENSMUSG00000019846	Lama4	1.037	0.0289
ENSMUSG00000028195	Cyr61	1.037	1.56e-32
ENSMUSG00000037235	Mxd4	1.037	8.57e-18
ENSMUSG00000008393	Carhsp1	1.036	5.8e-63
ENSMUSG00000085085	1700086P04Rik	1.035	0.407
ENSMUSG00000080797	Gm15760	1.034	0.34
ENSMUSG00000102555	6430511E19Rik	1.034	0.0636
ENSMUSG00000105135	RP23-418O21.3	1.034	0.0995
ENSMUSG00000086539	Gm16759	1.033	0.239
ENSMUSG00000097345	AA543186	1.033	0.385
ENSMUSG00000061232	H2-K1	1.032	2.42e-15
ENSMUSG00000097785	B230217O12Rik	1.032	0.0144
ENSMUSG00000028469	Npr2	1.031	5.61e-12
ENSMUSG00000082279	Gm12870	1.031	0.318
ENSMUSG00000025355	Mmp19	1.03	0.00279
ENSMUSG00000029452	Tmem116	1.03	0.0906
ENSMUSG00000038286	Bphl	1.03	8.18e-06
ENSMUSG00000049555	Tmie	1.03	0.162
ENSMUSG00000093720	Gm20635	1.03	0.433
ENSMUSG00000032456	Nmnat3	1.029	0.000729
ENSMUSG00000087159	Gm15246	1.029	0.0484
ENSMUSG00000092289	Gm6659	1.029	0.41
ENSMUSG00000097233	Gm17552	1.029	5.86e-06
ENSMUSG00000037419	Endod1	1.028	2.91e-18
ENSMUSG00000097289	2010300F17Rik	1.028	6.3e-08
ENSMUSG00000029333	Rasgef1b	1.026	0.182
ENSMUSG00000069835	Sat2	1.026	0.000154
ENSMUSG00000072294	Klf12	1.026	0.314
ENSMUSG00000097526	Gm26847	1.026	0.066
ENSMUSG00000086158	Ccpg1os	1.025	0.0238
ENSMUSG00000096986	4930509E16Rik	1.025	0.181
ENSMUSG00000022296	Baalc	1.024	0.0481
ENSMUSG00000035875	AI182371	1.024	0.581
ENSMUSG00000104002	Gm38336	1.024	0.385
ENSMUSG00000022515	Anks3	1.023	1.3e-20
ENSMUSG00000029385	Ccng2	1.023	1.06e-17
ENSMUSG00000070610	Gm13127	1.023	0.0784
ENSMUSG00000085379	2310058D17Rik	1.023	0.00351
ENSMUSG00000101678	Gm29609	1.023	0.269
ENSMUSG00000096981	Gm16845	1.022	0.144
ENSMUSG00000106928	RP23-26P10.1	1.021	0.0264
ENSMUSG00000030730	Atp2a1	1.02	0.485
ENSMUSG00000020034	Tcp11l2	1.019	0.000692
ENSMUSG00000025350	Rdh5	1.019	0.0222
ENSMUSG00000006310	Zbtb32	1.018	0.462
ENSMUSG00000081030	Gm12704	1.018	0.503
ENSMUSG00000031239	Itm2a	1.017	0.0124
ENSMUSG00000039220	Ppp1r10	1.016	1.1e-45
ENSMUSG00000053714	4732471J01Rik	1.016	0.308
ENSMUSG00000017713	Tha1	1.015	0.118
ENSMUSG00000019894	Slc6a15	1.015	0.409
ENSMUSG00000038065	Mturn	1.015	0.0556
ENSMUSG00000099098	1110035H17Rik	1.015	0.408
ENSMUSG00000022323	Hrsp12	1.014	4.28e-14
ENSMUSG00000038058	Nod1	1.014	4.59e-05
ENSMUSG00000038375	Trp53inp2	1.014	3.91e-18
ENSMUSG00000039496	Cdnf	1.014	0.0884
ENSMUSG00000044139	Prss53	1.014	0.513
ENSMUSG00000098176	Ccdc166	1.014	0.156
ENSMUSG00000015083	C8g	1.013	0.13
ENSMUSG00000039611	Tmem246	1.013	0.185
ENSMUSG00000104018	4833412K13Rik	1.013	0.534
ENSMUSG00000038235	F11r	1.012	3.21e-15
ENSMUSG00000079057	Cyp4v3	1.012	0.00104
ENSMUSG00000097564	C430014B12Rik	1.012	0.358
ENSMUSG00000022157	Mcpt8	1.01	0.303
ENSMUSG00000057137	Tmem140	1.01	0.00266
ENSMUSG00000032565	Nudt16	1.009	0.0024
ENSMUSG00000085956	4930481B07Rik	1.009	0.171
ENSMUSG00000089669	Tnfsf13	1.009	0.291
ENSMUSG00000094441	Zfp955a	1.009	6.6e-06
ENSMUSG00000079652	Fam71f2	1.008	0.239
ENSMUSG00000003546	Klc4	1.007	4.7e-11
ENSMUSG00000047370	Gm7367	1.007	0.413
ENSMUSG00000082179	Gm11407	1.007	0.33
ENSMUSG00000086873	Gm15672	1.007	0.261
ENSMUSG00000049624	Slc17a5	1.006	1.73e-08
ENSMUSG00000079259	Trim71	1.006	0.0492
ENSMUSG00000092341	Malat1	1.006	2.4e-20
ENSMUSG00000026479	Lamc2	1.005	9.19e-11
ENSMUSG00000107066	RP23-46L17.4	1.005	0.327
ENSMUSG00000021120	Pigh	1.004	2.74e-07
ENSMUSG00000032652	Crebl2	1.003	1.06e-09
ENSMUSG00000040312	Cchcr1	1.003	8.46e-38
ENSMUSG00000097183	Gm17501	1.003	9.82e-15
ENSMUSG00000103906	Tigd5	1.003	0.0395
ENSMUSG00000021573	Tppp	1.002	0.568
ENSMUSG00000079330	Lemd1	1.002	0.629
ENSMUSG00000099137	Gm10603	1.002	0.242
ENSMUSG00000006930	Hap1	1.001	2.6e-09
ENSMUSG00000029638	Glcci1	1.001	0.0579
ENSMUSG00000033147	Slc22a15	1.001	0.000662
ENSMUSG00000033880	Lgals3bp	1.001	5.82e-07
ENSMUSG00000034664	Itga2b	1.001	0.00397
ENSMUSG00000040187	Arntl2	1.001	0.00159
ENSMUSG00000026321	Tnfrsf11a	0.9998	0.0122
ENSMUSG00000039747	Orai2	0.9991	8.18e-11
ENSMUSG00000046687	Gm5424	0.999	0.231
ENSMUSG00000105368	RP23-459I1.3	0.9987	0.281
ENSMUSG00000038860	Garnl3	0.9985	3.53e-07
ENSMUSG00000033540	Idua	0.9983	2.95e-07
ENSMUSG00000102300	Gm34106	0.9981	0.637
ENSMUSG00000086610	Gm15408	0.9971	0.244
ENSMUSG00000025494	Sigirr	0.9957	0.00607
ENSMUSG00000028212	Ccne2	0.9953	2.05e-53
ENSMUSG00000086416	Gm14002	0.9951	0.0576
ENSMUSG00000044024	Rell2	0.995	0.00893
ENSMUSG00000033032	Afap1l1	0.9949	0.243
ENSMUSG00000097073	9430037G07Rik	0.9948	0.365
ENSMUSG00000078920	Ifi47	0.994	0.241
ENSMUSG00000073002	Vamp5	0.9933	1.72e-05
ENSMUSG00000038069	Cdkn2aip	0.9932	3.78e-22
ENSMUSG00000064202	4430402I18Rik	0.9924	0.358
ENSMUSG00000020312	Shc2	0.9917	0.00331
ENSMUSG00000035109	Shc4	0.991	0.000389
ENSMUSG00000032392	Parp16	0.9906	3.06e-05
ENSMUSG00000026939	Tmem141	0.9905	0.297
ENSMUSG00000004951	Hspb1	0.99	6.49e-11
ENSMUSG00000035640	Cbarp	0.9895	2.13e-12
ENSMUSG00000045991	Onecut2	0.9889	0.183
ENSMUSG00000021668	Polk	0.9884	1.99e-21
ENSMUSG00000072915	Gm12258	0.9883	1e-06
ENSMUSG00000037005	Xpnpep2	0.9879	0.0325
ENSMUSG00000097831	4930540M05Rik	0.9871	0.219
ENSMUSG00000070315	4930581F22Rik	0.9869	0.00363
ENSMUSG00000020948	Klhl28	0.9866	9.17e-05
ENSMUSG00000029769	Ccdc136	0.9862	5.29e-14
ENSMUSG00000034786	Gpsm3	0.9837	0.192
ENSMUSG00000039908	Slc26a11	0.9834	3.46e-10
ENSMUSG00000093483	AA465934	0.9831	0.00147
ENSMUSG00000021509	Slc25a48	0.983	0.341
ENSMUSG00000031673	Cdh11	0.9822	0.231
ENSMUSG00000047227	Gm527	0.982	0.00106
ENSMUSG00000081058	Hist2h3c2	0.9817	0.417
ENSMUSG00000087408	Cers1	0.98	0.0149
ENSMUSG00000029650	Slc46a3	0.9799	0.196
ENSMUSG00000086003	B230206L02Rik	0.9798	0.489
ENSMUSG00000048216	Gpr85	0.9792	0.0272
ENSMUSG00000097868	A330069E16Rik	0.9787	0.043
ENSMUSG00000031066	Usp11	0.9785	1.19e-08
ENSMUSG00000026315	Serpinb8	0.9781	0.0534
ENSMUSG00000030380	Mzf1	0.9779	0.0199
ENSMUSG00000045333	Zfp423	0.9779	0.405
ENSMUSG00000000409	Lck	0.9778	0.0239
ENSMUSG00000017167	Cntnap1	0.9776	8.46e-06
ENSMUSG00000028125	Abca4	0.9769	0.319
ENSMUSG00000020057	Dram1	0.9765	9.41e-07
ENSMUSG00000067931	Zfp948	0.976	2.24e-27
ENSMUSG00000078776	9530053A07Rik	0.9751	0.00315
ENSMUSG00000073415	Gm10501	0.975	0.168
ENSMUSG00000026031	Cflar	0.9749	3.19e-27
ENSMUSG00000039911	Spsb1	0.9749	6.91e-06
ENSMUSG00000032238	Rora	0.9746	0.000684
ENSMUSG00000026548	Slamf9	0.9741	0.337
ENSMUSG00000042228	Lyn	0.974	0.333
ENSMUSG00000071192	Wfikkn1	0.973	0.17
ENSMUSG00000096946	Fmr1os	0.973	0.248
ENSMUSG00000097027	Gm26559	0.9728	0.39
ENSMUSG00000033327	Tnxb	0.9727	0.0171
ENSMUSG00000029410	Ppef2	0.9722	0.322
ENSMUSG00000083392	Gm6335	0.9712	0.503
ENSMUSG00000103473	Gm37696	0.9708	0.426
ENSMUSG00000040006	Ginm1	0.9707	8.72e-21
ENSMUSG00000022358	Fbxo32	0.9705	4.3e-06
ENSMUSG00000062421	Arf2	0.9698	2.55e-42
ENSMUSG00000002325	Irf9	0.9695	7.77e-13
ENSMUSG00000041607	Mbp	0.9693	0.356
ENSMUSG00000008206	Cers4	0.9691	0.0541
ENSMUSG00000037262	Kin	0.9687	1.35e-32
ENSMUSG00000095123	Gm21781	0.9683	0.000659
ENSMUSG00000086968	4933431E20Rik	0.9677	0.000112
ENSMUSG00000097415	AU020206	0.9665	8.11e-05
ENSMUSG00000078902	Gm14443	0.9663	0.0852
ENSMUSG00000065037	Rn7sk	0.9656	0.0477
ENSMUSG00000023036	Pcdhga8	0.9655	0.421
ENSMUSG00000031389	Arhgap4	0.9655	0.466
ENSMUSG00000081227	Gm13082	0.9655	0.355
ENSMUSG00000017119	Nbr1	0.9652	1.46e-31
ENSMUSG00000038859	Baiap2l1	0.965	0.0271
ENSMUSG00000086682	Gm16023	0.9649	0.182
ENSMUSG00000039770	Ypel5	0.9648	3.79e-14
ENSMUSG00000031972	Acta1	0.9647	0.0117
ENSMUSG00000101013	A630072M18Rik	0.9646	0.421
ENSMUSG00000027792	Bche	0.9636	0.379
ENSMUSG00000087424	5730405O15Rik	0.9633	0.524
ENSMUSG00000027939	Nup210l	0.9627	0.00365
ENSMUSG00000025076	Casp7	0.9626	2.81e-15
ENSMUSG00000066829	Zfp810	0.9624	0.0235
ENSMUSG00000022965	Ifngr2	0.9623	4.59e-38
ENSMUSG00000038213	Tapbpl	0.9618	3e-08
ENSMUSG00000074340	Ovgp1	0.9614	0.122
ENSMUSG00000026034	Clk1	0.9613	8.6e-44
ENSMUSG00000084781	D930015M05Rik	0.9613	0.646
ENSMUSG00000024423	Impact	0.961	1.89e-21
ENSMUSG00000090272	Mndal	0.9609	0.366
ENSMUSG00000031391	L1cam	0.9606	0.0709
ENSMUSG00000085396	Firre	0.9605	9.97e-18
ENSMUSG00000003279	Dlgap1	0.96	0.425
ENSMUSG00000041477	Dcp1b	0.96	0.0881
ENSMUSG00000025006	Sorbs1	0.9597	0.000493
ENSMUSG00000028126	Pip5k1a	0.9592	5.45e-43
ENSMUSG00000032067	Pts	0.9589	6.53e-09
ENSMUSG00000022292	Rrm2b	0.9585	7.7e-20
ENSMUSG00000032839	Trpc1	0.9585	3.72e-07
ENSMUSG00000038456	Dennd2a	0.9584	9.21e-06
ENSMUSG00000007038	Neu1	0.958	9.72e-30
ENSMUSG00000015090	Ptgds	0.9575	0.514
ENSMUSG00000084845	Tmem240	0.957	0.0395
ENSMUSG00000067219	Nipal1	0.956	0.00986
ENSMUSG00000040701	Ap1g2	0.9555	1.45e-08
ENSMUSG00000074646	6430550D23Rik	0.9539	0.0595
ENSMUSG00000042628	Zfyve1	0.9538	1.33e-19
ENSMUSG00000021123	Rdh12	0.9533	0.102
ENSMUSG00000052949	Rnf157	0.9531	3.71e-13
ENSMUSG00000039774	Galnt12	0.9522	0.107
ENSMUSG00000081884	Gm11821	0.9487	0.17
ENSMUSG00000054582	Pabpc1l	0.9485	0.027
ENSMUSG00000090207	4930524O07Rik	0.9483	0.341
ENSMUSG00000042408	Zmym6	0.9477	4.28e-14
ENSMUSG00000033967	Rnf225	0.9475	0.00759
ENSMUSG00000025213	Kazald1	0.9469	0.13
ENSMUSG00000046962	Zbtb21	0.9465	5.08e-20
ENSMUSG00000030616	Sytl2	0.9462	0.0636
ENSMUSG00000062044	Lmtk3	0.9458	0.000172
ENSMUSG00000021631	Mrps36-ps1	0.9457	0.403
ENSMUSG00000023048	Prr13	0.9452	3.87e-32
ENSMUSG00000000958	Slc7a7	0.9451	0.236
ENSMUSG00000097277	2900076A07Rik	0.9447	0.0157
ENSMUSG00000056888	Glipr1	0.9444	0.00814
ENSMUSG00000085037	4933421O10Rik	0.9436	0.0183
ENSMUSG00000029798	Herc6	0.9435	1.5e-07
ENSMUSG00000044595	Dnd1	0.9433	0.00282
ENSMUSG00000085287	4833418N02Rik	0.9432	0.114
ENSMUSG00000032609	Klhdc8b	0.9414	0.000407
ENSMUSG00000040631	Dok4	0.9414	2.66e-11
ENSMUSG00000040253	Gbp7	0.941	0.481
ENSMUSG00000038570	Saxo2	0.9403	0.201
ENSMUSG00000095789	Nupr1l	0.94	0.564
ENSMUSG00000002910	Arrdc2	0.9398	0.000178
ENSMUSG00000021815	Mss51	0.9396	0.153
ENSMUSG00000024427	Spry4	0.9389	0.00296
ENSMUSG00000027309	4930402H24Rik	0.9387	2.56e-17
ENSMUSG00000026889	Rbm18	0.9377	1.8e-35
ENSMUSG00000000690	Hoxb6	0.9372	0.0215
ENSMUSG00000068744	Psrc1	0.9368	7.25e-06
ENSMUSG00000102418	Sh2d1b1	0.9364	0.0725
ENSMUSG00000069892	9930111J21Rik2	0.9363	7.7e-06
ENSMUSG00000042613	Pbxip1	0.9357	3.59e-28
ENSMUSG00000087132	A930001C03Rik	0.9353	0.306
ENSMUSG00000085166	Gm15522	0.9348	0.618
ENSMUSG00000108207	RP23-134H19.4	0.9341	0.241
ENSMUSG00000048731	Ggnbp1	0.9339	0.0196
ENSMUSG00000025420	Katnal2	0.9336	2.97e-05
ENSMUSG00000029816	Gpnmb	0.9336	2.74e-05
ENSMUSG00000073434	Wdr90	0.9335	7.27e-25
ENSMUSG00000096910	Zfp955b	0.9314	5.31e-05
ENSMUSG00000006241	Ccdc159	0.931	0.0227
ENSMUSG00000026826	Nr4a2	0.9307	1.37e-05
ENSMUSG00000051455	Gm1564	0.9302	0.555
ENSMUSG00000043782	Ccdc64b	0.9299	0.355
ENSMUSG00000052566	Hook2	0.9292	1.63e-12
ENSMUSG00000104891	RP23-434H17.3	0.9291	0.542
ENSMUSG00000002109	Ddb2	0.9288	0.00017
ENSMUSG00000098098	Bvht	0.9287	0.0625
ENSMUSG00000078519	2310026L22Rik	0.9286	0.408
ENSMUSG00000028466	Creb3	0.9276	7.5e-30
ENSMUSG00000023191	P3h3	0.9274	2.85e-11
ENSMUSG00000021661	Ankra2	0.9272	2.81e-14
ENSMUSG00000031762	Mt2	0.9272	7.17e-11
ENSMUSG00000032607	Amt	0.9272	0.00547
ENSMUSG00000025743	Sdc3	0.927	9.17e-06
ENSMUSG00000017417	Plxdc1	0.9269	0.528
ENSMUSG00000030083	Abtb1	0.9267	3.63e-06
ENSMUSG00000044827	Tlr1	0.9267	0.086
ENSMUSG00000038271	Iffo1	0.9259	2.72e-12
ENSMUSG00000036501	Fam13b	0.9257	1.14e-14
ENSMUSG00000043943	Naalad2	0.9254	0.354
ENSMUSG00000097403	9230116N13Rik	0.9254	0.108
ENSMUSG00000041062	Mslnl	0.9249	0.385
ENSMUSG00000097245	Gm5421	0.9236	0.0993
ENSMUSG00000036934	4921524J17Rik	0.9235	6.59e-15
ENSMUSG00000086390	1810019D21Rik	0.9232	0.378
ENSMUSG00000028132	Tmem56	0.9229	0.453
ENSMUSG00000059013	Sh2d3c	0.9224	0.00101
ENSMUSG00000028840	Zfp593	0.921	0.000407
ENSMUSG00000085289	Gm15337	0.9208	0.132
ENSMUSG00000030409	Dmpk	0.9206	6.05e-13
ENSMUSG00000021271	Zfp839	0.9205	2.11e-06
ENSMUSG00000085755	Gm13496	0.9201	0.322
ENSMUSG00000102691	Gm37780	0.9201	0.436
ENSMUSG00000040511	Pvr	0.9194	1.21e-15
ENSMUSG00000053192	Mllt11	0.9188	8.32e-19
ENSMUSG00000075289	Carns1	0.9185	1.16e-17
ENSMUSG00000037857	Nufip2	0.9183	2.91e-32
ENSMUSG00000066170	E230001N04Rik	0.9183	0.353
ENSMUSG00000104164	Gm38248	0.9171	0.353
ENSMUSG00000032715	Trib3	0.917	4.53e-14
ENSMUSG00000022044	Stmn4	0.916	0.00866
ENSMUSG00000021913	Ogdhl	0.9158	1.16e-10
ENSMUSG00000023039	Krt7	0.9158	0.0192
ENSMUSG00000024827	Gldc	0.9153	0.151
ENSMUSG00000086528	Gm15731	0.915	0.169
ENSMUSG00000002799	Jag2	0.9148	7.62e-08
ENSMUSG00000062470	Fbxl12os	0.9147	0.228
ENSMUSG00000058656	Samd12	0.9128	0.701
ENSMUSG00000035458	Tnni3	0.9125	0.435
ENSMUSG00000010051	Hyal1	0.9121	0.159
ENSMUSG00000017677	Wsb1	0.9119	1.97e-33
ENSMUSG00000004098	Col5a3	0.9115	0.0578
ENSMUSG00000028378	Ptgr1	0.911	6.64e-14
ENSMUSG00000038836	Agbl3	0.9104	7.45e-05
ENSMUSG00000015452	Ager	0.9097	0.0467
ENSMUSG00000106734	RP24-328P2.5	0.9096	0.249
ENSMUSG00000024948	Map4k2	0.909	6.23e-24
ENSMUSG00000018820	Zfyve27	0.9079	1.11e-25
ENSMUSG00000032515	Csrnp1	0.9075	1.02e-09
ENSMUSG00000024298	Zfp871	0.9071	1.08e-18
ENSMUSG00000038365	Fbxo25	0.9069	1.01e-13
ENSMUSG00000020326	Ccng1	0.9068	2.41e-41
ENSMUSG00000042099	Kank3	0.9064	0.0714
ENSMUSG00000058831	Opn1sw	0.9063	0.315
ENSMUSG00000105868	RP24-223I19.6	0.9062	0.487
ENSMUSG00000032446	Eomes	0.9049	0.0895
ENSMUSG00000081670	Gm15697	0.9042	0.563
ENSMUSG00000092569	Gm20544	0.9026	0.00651
ENSMUSG00000037447	Arid5a	0.9	1.23e-14
ENSMUSG00000037266	Rsrp1	0.8998	3.87e-18
ENSMUSG00000051278	Zgrf1	0.8996	7.3e-17
ENSMUSG00000036622	Atp13a2	0.8989	1.58e-17
ENSMUSG00000051439	Cd14	0.8986	5.41e-06
ENSMUSG00000054723	Vmac	0.8984	3.79e-06
ENSMUSG00000044566	Cage1	0.8981	0.219
ENSMUSG00000083819	Gm11977	0.8979	0.129
ENSMUSG00000063765	Chadl	0.8973	0.000837
ENSMUSG00000051344	Plekhm3	0.8972	2.76e-10
ENSMUSG00000098066	Gm26944	0.8967	0.394
ENSMUSG00000046598	Bdh1	0.8966	0.0469
ENSMUSG00000002550	Uck1	0.8955	4.06e-24
ENSMUSG00000024901	Peli3	0.8949	0.0196
ENSMUSG00000020638	Cmpk2	0.8946	0.433
ENSMUSG00000023074	Mospd1	0.8945	3.44e-05
ENSMUSG00000078864	Gm14322	0.8939	0.0255
ENSMUSG00000037259	Dzank1	0.8938	0.12
ENSMUSG00000097616	1110019D14Rik	0.8938	0.0187
ENSMUSG00000089989	Flt3l	0.8936	0.0256
ENSMUSG00000031489	Adrb3	0.893	0.208
ENSMUSG00000033460	Armcx1	0.8929	0.152
ENSMUSG00000014503	Pkd2l2	0.8925	0.0006
ENSMUSG00000086916	Gm15903	0.8921	0.589
ENSMUSG00000085741	5430405H02Rik	0.892	0.0576
ENSMUSG00000085408	C530005A16Rik	0.8914	0.31
ENSMUSG00000019823	Mical1	0.8906	4.95e-07
ENSMUSG00000097028	Ptgs2os	0.8906	0.000177
ENSMUSG00000034587	8430429K09Rik	0.8903	9.3e-08
ENSMUSG00000074577	Fam65c	0.8893	0.234
ENSMUSG00000039382	Wdr45	0.8891	4.72e-22
ENSMUSG00000051726	Kcnf1	0.8891	0.188
ENSMUSG00000092241	Gm20522	0.886	0.242
ENSMUSG00000087377	AV099323	0.8859	0.13
ENSMUSG00000028476	Reck	0.8858	0.000745
ENSMUSG00000035245	Eogt	0.8856	2.15e-21
ENSMUSG00000035451	Foxa1	0.8847	0.416
ENSMUSG00000027661	Slc2a10	0.8843	0.0741
ENSMUSG00000045348	Nyap1	0.8842	9.21e-06
ENSMUSG00000097080	1700086O06Rik	0.8841	3.07e-05
ENSMUSG00000048416	Mlf1	0.884	0.0055
ENSMUSG00000035829	Ppp1r26	0.8839	0.00998
ENSMUSG00000048826	Dact2	0.8834	0.479
ENSMUSG00000068231	Vmn1r43	0.883	0.629
ENSMUSG00000054509	Parp4	0.8828	4.77e-13
ENSMUSG00000053219	Raet1e	0.8827	0.0036
ENSMUSG00000039375	Wdr17	0.8814	0.057
ENSMUSG00000055271	9330161L09Rik	0.8806	0.603
ENSMUSG00000020883	Fbxl20	0.8797	2.96e-15
ENSMUSG00000102246	9430037O13Rik	0.8786	0.305
ENSMUSG00000097402	Gm17399	0.8776	0.177
ENSMUSG00000022594	Lynx1	0.8759	8.66e-09
ENSMUSG00000047735	Samd9l	0.8757	9.78e-05
ENSMUSG00000106990	RP23-23C4.6	0.875	9.5e-05
ENSMUSG00000074220	Zfp382	0.8746	2.56e-07
ENSMUSG00000097047	1110020A21Rik	0.8728	0.356
ENSMUSG00000079502	1700101E01Rik	0.8721	0.515
ENSMUSG00000055323	Gm9967	0.8715	0.558
ENSMUSG00000087484	2900089D17Rik	0.8715	0.017
ENSMUSG00000097876	Gm16892	0.8711	0.45
ENSMUSG00000054519	Zfp867	0.8708	1.82e-06
ENSMUSG00000006179	Prss16	0.8703	0.0862
ENSMUSG00000100594	2810414N06Rik	0.8703	0.241
ENSMUSG00000097021	4933433G15Rik	0.8696	0.593
ENSMUSG00000102840	Gm38037	0.8696	0.0573
ENSMUSG00000037493	Cib2	0.8695	4.09e-05
ENSMUSG00000020689	Itgb3	0.8688	0.0579
ENSMUSG00000002625	Akap8l	0.8684	1.68e-11
ENSMUSG00000007035	Msh5	0.8675	0.15
ENSMUSG00000074529	C330013J21Rik	0.8675	0.266
ENSMUSG00000085890	Tnfsf13os	0.8672	0.514
ENSMUSG00000027660	Skil	0.867	8.44e-30
ENSMUSG00000052525	Spdya	0.8664	0.272
ENSMUSG00000057219	Armc7	0.8664	1.77e-06
ENSMUSG00000007021	Syngr3	0.8663	1.32e-12
ENSMUSG00000024302	Dtna	0.8663	0.0361
ENSMUSG00000048967	Yjefn3	0.8661	0.098
ENSMUSG00000083152	Apc-ps1	0.8653	0.642
ENSMUSG00000071537	Klrg2	0.8652	1e-09
ENSMUSG00000087519	AV039307	0.8641	0.383
ENSMUSG00000029186	Pi4k2b	0.8636	1.14e-20
ENSMUSG00000004642	Slbp	0.8625	3.81e-53
ENSMUSG00000071691	Gm960	0.8621	0.527
ENSMUSG00000006519	Cyba	0.8617	5.8e-14
ENSMUSG00000034330	Plcg2	0.8609	0.034
ENSMUSG00000009687	Fxyd5	0.8607	1.67e-28
ENSMUSG00000035273	Hpse	0.8607	0.00566
ENSMUSG00000085057	Gm13415	0.8603	2.67e-07
ENSMUSG00000025257	Ribc1	0.8587	0.0185
ENSMUSG00000052914	Cyp2j6	0.8579	3.93e-05
ENSMUSG00000002068	Ccne1	0.8575	6.38e-20
ENSMUSG00000026785	Pkn3	0.8573	6.91e-08
ENSMUSG00000038175	Mylip	0.8572	4.98e-06
ENSMUSG00000074457	S100a16	0.8569	0.000809
ENSMUSG00000030638	Sh3gl3	0.8563	0.508
ENSMUSG00000085457	1110046J04Rik	0.8562	0.00873
ENSMUSG00000032009	Sesn3	0.8554	2.05e-06
ENSMUSG00000028080	Lrba	0.8548	0.259
ENSMUSG00000025337	Sbds	0.8545	5.51e-31
ENSMUSG00000034928	Rnf44	0.8536	1.53e-29
ENSMUSG00000040714	Klc3	0.8532	0.0227
ENSMUSG00000027534	Snx16	0.853	5.18e-15
ENSMUSG00000023266	Frs3	0.8524	0.00716
ENSMUSG00000038418	Egr1	0.8515	0.0136
ENSMUSG00000041449	Serpina3h	0.8511	0.425
ENSMUSG00000079505	Gm11131	0.8511	0.661
ENSMUSG00000042042	Csgalnact2	0.8509	4.56e-20
ENSMUSG00000107502	RP24-194N1.2	0.8507	0.515
ENSMUSG00000047875	Gpr157	0.85	0.0177
ENSMUSG00000087168	Gm15983	0.8499	0.325
ENSMUSG00000105512	RP23-199B2.8	0.8495	0.369
ENSMUSG00000056429	Tgoln1	0.8489	9.66e-39
ENSMUSG00000097858	9530052C20Rik	0.8483	0.477
ENSMUSG00000020901	Pik3r5	0.8482	0.121
ENSMUSG00000083907	Plk-ps1	0.8482	0.171
ENSMUSG00000051703	Tmem198	0.8477	0.0284
ENSMUSG00000042751	Nmnat2	0.8475	0.000616
ENSMUSG00000004994	Ccdc130	0.8457	2.97e-09
ENSMUSG00000032174	Icam5	0.8452	0.181
ENSMUSG00000039616	Mocos	0.8444	0.0531
ENSMUSG00000049511	Htr1b	0.8436	0.0571
ENSMUSG00000001542	Ell2	0.8434	1.03e-16
ENSMUSG00000060477	Irak2	0.8427	8.32e-07
ENSMUSG00000020420	Zfp607	0.8424	0.0126
ENSMUSG00000034205	Loxl2	0.8422	0.00695
ENSMUSG00000086607	4930511M06Rik	0.8421	0.245
ENSMUSG00000005142	Man2b1	0.8412	4.68e-40
ENSMUSG00000023952	Gtpbp2	0.8412	8.07e-18
ENSMUSG00000028128	F3	0.8412	3.22e-24
ENSMUSG00000023984	Gm20517	0.8407	0.403
ENSMUSG00000027313	Chac1	0.8405	3.44e-12
ENSMUSG00000054910	4931415C17Rik	0.8405	0.393
ENSMUSG00000068740	Celsr2	0.8399	0.0796
ENSMUSG00000001942	Siae	0.8395	1.45e-05
ENSMUSG00000019718	L3hypdh	0.8395	0.268
ENSMUSG00000047067	Dusp28	0.8394	0.0055
ENSMUSG00000059713	Rcan3	0.8389	3.08e-16
ENSMUSG00000029098	Acox3	0.8386	5.39e-11
ENSMUSG00000031539	Ap3m2	0.8384	1.03e-07
ENSMUSG00000010064	Slc38a3	0.838	0.342
ENSMUSG00000045409	Trim39	0.838	6.62e-18
ENSMUSG00000074194	Zfp791	0.8377	0.116
ENSMUSG00000096370	Gm21992	0.8373	0.00366
ENSMUSG00000070720	Tmem200b	0.8366	5.23e-05
ENSMUSG00000028364	Tnc	0.8358	6.31e-08
ENSMUSG00000033114	Slc35d2	0.8349	0.000143
ENSMUSG00000055733	Nap1l3	0.8341	0.0663
ENSMUSG00000098678	Mroh6	0.8337	0.527
ENSMUSG00000004558	Ndrg2	0.8335	0.016
ENSMUSG00000032333	Stoml1	0.8331	4.72e-05
ENSMUSG00000034371	Tkfc	0.8324	2.72e-09
ENSMUSG00000104686	RP24-255F19.5	0.8319	0.18
ENSMUSG00000035399	Oser1	0.8318	7.93e-09
ENSMUSG00000047181	Samd14	0.8316	4.84e-19
ENSMUSG00000026303	Mlph	0.8315	0.656
ENSMUSG00000062127	Cttnbp2nl	0.831	2.85e-32
ENSMUSG00000001739	Cldn15	0.8299	0.456
ENSMUSG00000038591	Colec10	0.8299	0.639
ENSMUSG00000036057	Ptpn23	0.8298	4.02e-18
ENSMUSG00000046836	Brox	0.8297	5.23e-19
ENSMUSG00000036036	Zfp57	0.8291	2.98e-17
ENSMUSG00000007379	Dennd2c	0.829	5.46e-07
ENSMUSG00000085622	3110056K07Rik	0.8286	0.015
ENSMUSG00000024986	Hhex	0.8281	3.94e-05
ENSMUSG00000060600	Eno3	0.827	1.53e-15
ENSMUSG00000020653	Klf11	0.8267	1.46e-06
ENSMUSG00000018372	Cep95	0.8252	2.68e-09
ENSMUSG00000044968	Napepld	0.8252	0.000889
ENSMUSG00000019853	Hebp2	0.8249	0.000397
ENSMUSG00000021792	Fam213a	0.8247	0.436
ENSMUSG00000082431	Tdpx-ps1	0.8244	0.317
ENSMUSG00000020205	Phlda1	0.8243	1.13e-20
ENSMUSG00000027242	Wdr76	0.8242	1.59e-31
ENSMUSG00000028385	Snx30	0.8242	3.36e-09
ENSMUSG00000017499	Cdc6	0.8241	4.68e-40
ENSMUSG00000084328	Gm14046	0.8239	0.477
ENSMUSG00000085569	Gm12602	0.8239	0.237
ENSMUSG00000074024	4632427E13Rik	0.8238	0.023
ENSMUSG00000039789	Zfp597	0.8222	1.98e-08
ENSMUSG00000062743	Zfp677	0.8221	0.295
[truncated: 13,023 more rows]
