# Supplementary material for: Nucleolin perturbation alters membrane lipid homeostasis
Source: Royal Society of Chemistry journal article supplement (doi:10.1039/d5mo00088b), 2025-10-28
Supplement: d5mo00088b5.xlsx [file d5mo00088b5.xlsx]

## Sheet: RNA-seq cholesterol
Table S2
24 h		48h
Gene	log2FC AS1411/CTR	Gene	log2FC AS1411/CTR
Acat2	-0.5326	Acat2	-0.711
Cyp51	-0.788	Cyp51	-1.492
Dhcr7	-0.127	Dhcr7	-0.838
Dhcr24	-0.86	Dhcr24	-1.73
Fdft1	-0.85	Fdft1	-1.647
Fdps	-0.754	Fdps	-1.31
Hmgcr	-0.607	Hmgcr	-0.946
Hmgcs1	-1.05	Hmgcs1	-1.741
Idi1	-0.785	Idi1	-1.136
Lss	-0.626	Lss	-1.14
Msmo1	-0.8	Msmo1	-1.198
Mvd	-0.65	Mvd	-1.12
Mvk	-0.402	Mvk	-0.926
Nsdhl	-0.652	Nsdhl	-1.276
Pmvk	-0.348	Pmvk	-0.684
Sqle	-0.8	Sqle	-1.744
