# Supplementary material for: Nucleolin perturbation alters membrane lipid homeostasis
Source: Royal Society of Chemistry journal article supplement (doi:10.1039/d5mo00088b), 2025-10-28
Supplement: d5mo00088b6.xlsx [file d5mo00088b6.xlsx]

## Sheet: SILAC 24h
Gene Symbol	Protein Name	UniProt Accession	Repeat 1 (log2 ratio(H/L)	Repeat 2 (log2 ratio(H/L)	Repeat 3 (log2 ratio(H/L)	mean	std err	p value
Fam50a	Protein FAM50A	Q9WV03	0.379139	0.371378	0.37466	0.375059	0.00224934	1.79827e-05
Tax1bp1	Tax1-binding protein 1 homolog	Q3UKC1	-0.664717	-0.640345	-0.670388	-0.658483	0.00921586	9.79095e-05
Impdh2	Inosine-5'-monophosphate dehydrogenase 2	P24547	-0.76111	-0.757296	-0.722953	-0.74712	0.0121333	0.000131818
Rps19	Rps19 protein (Fragment)	Q5M9P3	-0.116987	-0.117641	-0.123148	-0.119259	0.00195412	0.00013419
Kif20b	Kinesin-like protein KIF20B	Q80WE4	-0.305475	-0.29357	-0.31661	-0.305218	0.00665218	0.000237338
Senp7	Sentrin-specific protease 7	Q8BUH8	0.258599	0.262249	0.278109	0.266319	0.00598867	0.000252637
Cenpe	Centromere-associated protein E	E9QKK1	-0.222929	-0.220113	-0.236627	-0.226556	0.00510043	0.000253222
Tanc1	Protein TANC1	Q0VGY8	0.0573156	0.0633854	0.0609566	0.0605525	0.00176382	0.000423705
Rasa3	Putative uncharacterized protein	Q3UGJ5	-0.210734	-0.197474	-0.218422	-0.208876	0.006118	0.000428402
Mdn1	Midasin	A2ANY6	-0.139478	-0.150063	-0.154667	-0.148069	0.00449646	0.000460449
Top1	DNA topoisomerase 1	Q04750	-0.335497	-0.304191	-0.304523	-0.314737	0.0103804	0.000542999
Hspd1	60 kDa heat shock protein, mitochondrial	P63038	-0.235905	-0.210365	-0.227066	-0.224445	0.00748828	0.000555634
Rpa2	Replication protein A 32 kDa subunit	Q3TE40	0.207731	0.21574	0.233471	0.218981	0.00760499	0.000601964
Pls3	Plastin-3	Q99K51	0.239867	0.262902	0.235248	0.246006	0.00855256	0.000603234
Rab13	Rab13	Q0PD42	1.33921	1.3339		1.33655	0.00265611	0.000632571
Rcc1	Putative uncharacterized protein	Q3U6D2	-0.372508	-0.375951	-0.335331	-0.361263	0.0130042	0.000646616
S100a8	Protein S100-A8	P27005	-5.99139	-6.32381	-6.82207	-6.37909	0.241382	0.00071438
Tsr1	Pre-rRNA-processing protein TSR1 homolog	Q5SWD9	-0.482907	-0.433927	-0.429656	-0.44883	0.017083	0.000722759
Polr2a	DNA-directed RNA polymerase	O08847	-0.147306	-0.16744	-0.1643	-0.159682	0.00625403	0.000765207
Jmjd7	JmjC domain-containing protein 7	P0C872	0.558841		0.556138	0.55749	0.00135148	0.000771655
Ivns1abp	Influenza virus NS1A-binding protein homolog	Q920Q8	-0.770349	-0.675836	-0.761107	-0.735764	0.0300823	0.000833736
Dbi	Acyl-CoA-binding protein	P31786	0.297704	0.290766	0.259881	0.282784	0.0116253	0.000842888
Orc3	Putative uncharacterized protein	Q3ULT0	-0.561597	-0.547435	-0.48977	-0.532934	0.0219659	0.000847257
Tpp2	Putative uncharacterized protein	Q3TW28	-0.078278	-0.0848404	-0.0734466	-0.078855	0.00330174	0.000874292
Spag7	Sperm-associated antigen 7	Q7TNE3	0.1886	0.176267	0.162813	0.175893	0.00744625	0.000893676
Bub3	Mitotic checkpoint protein BUB3	Q9WVA3	-0.235082	-0.225269	-0.203293	-0.221215	0.00939798	0.000899987
Phlpp1	PH domain leucine-rich repeat-containing protein phosphatase 1	Q8CHE4	-0.657386	-0.615705	-0.564326	-0.612472	0.0269127	0.000962622
Lta4h	Leukotriene A-4 hydrolase	P24527	0.190536	0.205555	0.175402	0.190498	0.0087044	0.00104066
2410018M08Rik	Putative uncharacterized protein	Q8CEW7	-0.205283	-0.23003	-0.24002	-0.225111	0.0103248	0.0010485
Pdap1	28 kDa heat- and acid-stable phosphoprotein	Q3UHX2	-0.139744	-0.163335	-0.159561	-0.154213	0.00731604	0.00112154
Psma7	Proteasome subunit alpha type	Q3TN31	-0.11304	-0.132918	-0.12027	-0.122076	0.00580901	0.00112834
Tma16	Translation machinery-associated protein 16	Q9CR02	-0.377152	-0.44484	-0.400562	-0.407518	0.0198471	0.00118176
Sf3b3	Splicing factor 3B subunit 3	Q921M3	-0.230107	-0.199481	-0.233458	-0.221016	0.0108105	0.00119195
Zc3h15	Zinc finger CCCH domain-containing protein 15	Q3TIV5	-0.269575	-0.310387	-0.267596	-0.282519	0.0139454	0.00121382
Sfpq	Splicing factor, proline- and glutamine-rich	Q8VIJ6	-0.140533	-0.164292	-0.16613	-0.156985	0.00824307	0.00137291
Mrpl39	Putative uncharacterized protein	Q8CCX9	-0.373814	-0.365221	-0.313559	-0.350865	0.0188172	0.00143196
Aldh7a1	Alpha-aminoadipic semialdehyde dehydrogenase	Q9DBF1	0.103556	0.124432	0.110911	0.112966	0.00611338	0.00145791
Clasp1	Clasp1 protein	A5D6Q8	-0.189907	-0.158638	-0.185207	-0.177917	0.00973448	0.0014901
Tbcd	Tubulin-specific chaperone D	Q8BYA0	0.345084	0.320315	0.285129	0.316843	0.0173944	0.00150018
Nisch	Nischarin	Q80TM9	0.300927	0.35916	0.355269	0.338452	0.0187962	0.00153501
Eif5	Eukaryotic translation initiation factor 5	P59325	-0.168629	-0.168673	-0.198552	-0.178618	0.00996711	0.00154965
Sugp2	SURP and G-patch domain-containing protein 2	Q8CH09	-0.529966	-0.501078	-0.4373	-0.489448	0.0273751	0.00155682
Bysl	Bystin	O54825	-0.312335	-0.368865	-0.374307	-0.351835	0.0198127	0.00157805
Itga5	Integrin alpha-5	P11688		0.47946	0.474617	0.477038	0.00242104	0.00161546
Ndc80	Kinetochore protein NDC80 homolog	Q9D0F1	0.303433	0.250504	0.267123	0.273687	0.0156278	0.00162233
Map1a	Microtubule-associated protein 1A	Q9QYR6	0.273105	0.225955	0.266969	0.255343	0.0148003	0.00167141
Wapal	Wings apart-like protein homolog	Q65Z40	-0.15378	-0.146071	-0.126124	-0.141992	0.00823989	0.00167533
Dnm2	Dynamin-2	P39054	0.129023	0.15045	0.157333	0.145602	0.0085241	0.00170493
Eif3k	Eukaryotic translation initiation factor 3 subunit K	Q9DBZ5	-0.174411	-0.20518	-0.212124	-0.197239	0.0115882	0.00171701
Wdr36	Protein Wdr36	Q3TA68	-0.272789	-0.333435	-0.29459	-0.300272	0.017736	0.00173536
Prkag2	Putative uncharacterized protein	Q3TMN8	0.162569		0.160769	0.161669	0.000900129	0.00177225
Syngr3	Synaptogyrin-3	Q8R191	0.413971	0.33822	0.399149	0.38378	0.0231782	0.00181383
Rrp12	Putative uncharacterized protein	Q3UJA1	-0.322941	-0.307788	-0.26282	-0.29785	0.018053	0.00182679
Ptpn23	Tyrosine-protein phosphatase non-receptor type 23	Q6PB44	0.139295	0.159611	0.172052	0.156986	0.00954673	0.00183889
Chek1	Serine/threonine-protein kinase Chk1	O35280	-0.318145	-0.373531	-0.392163	-0.36128	0.0222281	0.00188205
Pitrm1	Presequence protease, mitochondrial	Q8K411	0.198465	0.201536	0.165037	0.188346	0.0116883	0.00191451
Exosc8	CBP-interacting protein 3	Q546F8	-0.19056	-0.227025	-0.188055	-0.20188	0.0125934	0.00193439
Aimp1	Aminoacyl tRNA synthase complex-interacting multifunctional protein 1	P31230	-0.117123	-0.1453	-0.136645	-0.133023	0.00833332	0.00195078
Lipn	Lipase member N	Q3U4B4	-8.90116	-8.57355	-7.2067	-8.22713	0.51891	0.00197731
Vps26a	Vacuolar protein sorting-associated protein 26A	P40336	0.101762	0.12627	0.119663	0.115898	0.00732111	0.00198326
Fth1	Ferritin heavy chain	P09528	-0.518422	-0.416234	-0.488975	-0.474544	0.0303686	0.00203521
Ddx54	Putative uncharacterized protein	Q8CD14	-0.497816	-0.438208	-0.396727	-0.44425	0.0293378	0.0021664
Fgb	Fibrinogen, B beta polypeptide, isoform CRA_a	Q3TGR2	-6.31032	-6.25166	-5.08837	-5.88345	0.3979	0.00227136
Imp4	U3 small nucleolar ribonucleoprotein protein IMP4	Q8VHZ7	-0.168509	-0.164805	-0.134729	-0.156014	0.0106961	0.00233371
Stxbp3	Syntaxin-binding protein 3	Q60770	0.104616	0.132238	0.114209	0.117021	0.00809675	0.00237663
Acbd3	Acyl-Coenzyme A binding domain containing 3	Q6P9T6	0.100219	0.126858	0.121991	0.116356	0.00818971	0.00245876
Brox	BRO1 domain-containing protein BROX	Q8K2Q7	0.433618	0.344758	0.424986	0.401121	0.0282915	0.00246891
Cct8	Putative uncharacterized protein	Q3UKQ2	-0.22231	-0.18068	-0.180874	-0.194621	0.0138443	0.00251103
Pygb	Phosphorylase	Q3UGT5	0.388748	0.485728	0.488059	0.454178	0.0327222	0.00257535
Nt5c	5'(3')-deoxyribonucleotidase, cytosolic type	Q9JM14	0.234313	0.25472	0.298682	0.262572	0.0189917	0.00259545
Rabgap1	Rab GTPase-activating protein 1	A2AWA9	0.10718	0.128383	0.101719	0.112427	0.00813206	0.00259558
Adck5	Uncharacterized aarF domain-containing protein kinase 5	Q80V03	-0.11483	-0.132319	-0.148257	-0.131802	0.00965293	0.00266053
Hmgcr	3-hydroxy-3-methylglutaryl-coenzyme A reductase	Q01237	-1.31604	-1.19351	-1.53497	-1.34817	0.0998722	0.00272151
Atp6ap2	Renin/prorenin receptor	Q1XID4	-0.532105	-0.522958		-0.527532	0.00457362	0.00275963
Arhgef17	Rho guanine nucleotide exchange factor 17	Q80U35	0.445209	0.342798	0.410405	0.39947	0.0300649	0.00280833
Rpl35a	60S ribosomal protein L35a	O55142	-0.25927	-0.209526	-0.270572	-0.246456	0.0187511	0.00286942
Mak16	Protein MAK16 homolog	Q8BGS0	-0.880567	-0.676833	-0.836755	-0.798052	0.0619146	0.0029826
Chmp2a	Charged multivesicular body protein 2a	Q9DB34	-0.192033	-0.248571	-0.208076	-0.216226	0.0168221	0.0029991
Grb10	Growth factor receptor-bound protein 10	Q60760	-0.584241	-0.749772	-0.613985	-0.649333	0.0509484	0.00305006
Ifrd2	IRFD2 (Fragment)	Q7TSB3	-0.504625	-0.440476	-0.578675	-0.507925	0.0399288	0.00306154
Lepre1	Prolyl 3-hydroxylase 1	Q3V1T4	0.369462	0.281839	0.318194	0.323165	0.0254165	0.0030644
Adar	Putative uncharacterized protein	Q3UH31	0.0812344	0.0877964	0.0667012	0.0785773	0.0062329	0.00311659
Akirin2	Akirin-2	B1AXD8	-0.498701		-0.489006	-0.493854	0.00484748	0.00312431
Ehd1	Putative uncharacterized protein (Fragment)	Q3TCK3	-0.126254	-0.149567	-0.16698	-0.1476	0.0117974	0.00316398
Donson	Protein downstream neighbor of Son	Q9QXP4	-0.586569	-0.449175	-0.489985	-0.508576	0.0407369	0.00317745
Tagln	Transgelin	P37804	1.00374	0.762346	0.857633	0.874574	0.070198	0.00319047
Etfb	Electron transfer flavoprotein subunit beta	Q9DCW4	0.234588	0.177903	0.200911	0.204467	0.0164598	0.00320902
Npm1	MCG68069	Q5SQB7	-0.250301	-0.223921	-0.294751	-0.256324	0.0206674	0.00321924
Psap	Putative uncharacterized protein	Q3TIT5	0.0345391	0.0291143	0.0387079	0.0341204	0.00277733	0.00328024
Melk	Putative uncharacterized protein	Q3TJF3	0.473338	0.602616	0.478353	0.518102	0.0422818	0.00329711
Pcna	Proliferating cell nuclear antigen	P17918	0.200368	0.151801	0.169363	0.173844	0.0141978	0.00330197
Sgk1	Serine/threonine-protein kinase Sgk1	Q9WVC6	1.77625	1.81358		1.79491	0.0186644	0.00330982
Huwe1	Mcl-1 ubiquitin ligase	Q4JG03	-0.17065	-0.159518	-0.208392	-0.17952	0.0147893	0.00335929
Chd8	Chromodomain-helicase-DNA-binding protein 8	Q09XV5	0.0695865	0.0857794	0.0928977	0.0827545	0.00689723	0.00343747
Mrpl41	39S ribosomal protein L41, mitochondrial	Q9CQN7	-0.365869	-0.485786	-0.461159	-0.437605	0.0365653	0.00345483
Swap70	Switch-associated protein 70	Q6A028	0.139023	0.185749	0.173577	0.166116	0.0139947	0.0035114
Rpf2	Ribosome production factor 2 homolog	Q9JJ80	-0.416418	-0.558905	-0.512872	-0.496065	0.0419823	0.00354315
Fosl2	Fos-related antigen 2	P47930	0.0408907	0.0410311	0.0523682	0.0447633	0.00380264	0.00356965
Epha2	Ephrin type-A receptor 2	Q03145	-0.157733	-0.116722	-0.142579	-0.139011	0.0119726	0.00366815
Elac2	Putative uncharacterized protein	Q3U0M8	-0.372816	-0.275011	-0.335808	-0.327878	0.0285109	0.00373832
Isg20	Putative uncharacterized protein	Q3UW00		0.596281	0.582406	0.589343	0.00693716	0.00374665
Gemin5	Gem-associated protein 5	E9PUU4	-0.12877	-0.166944	-0.130548	-0.142087	0.0124388	0.00378841
Urb1	Nucleolar pre-ribosomal-associated protein 1	Q571H0	-0.327738	-0.308006	-0.407624	-0.34779	0.0304546	0.00379038
Srsf9	Serine/arginine-rich splicing factor 9	Q9D0B0	-0.122066	-0.165122	-0.154163	-0.147117	0.0129188	0.0038115
Tcp1	T-complex protein 1 subunit alpha	P11983	-0.147133	-0.140569	-0.185008	-0.15757	0.0138492	0.00381834
Acadvl	Very long-chain specific acyl-CoA dehydrogenase, mitochondrial	P50544	0.21368	0.193638	0.15691	0.188076	0.0166222	0.00386037
Pik3c3	Phosphatidylinositol 3-kinase catalytic subunit type 3	Q6PF93	0.347355	0.410163	0.473184	0.410234	0.0363238	0.00387451
S100a11	Protein S100-A11	P50543	0.209834	0.164144	0.160021	0.178	0.0159617	0.0039727
Aco1	Cytoplasmic aconitate hydratase	P28271	0.157053	0.215739	0.194199	0.188997	0.0171395	0.00406199
Sun1	SUN domain-containing protein 1	Q9D666	0.595901	0.64543	0.471023	0.570785	0.0518895	0.0040817
Nvl	Nuclear valosin-containing protein-like	Q9DBY8	-0.378936	-0.319978	-0.440708	-0.379874	0.0348551	0.00415701
Ubr1	E3 ubiquitin-protein ligase UBR1	O70481	0.12237	0.0921736	0.0957821	0.103442	0.00952121	0.00418297
Itch	E3 ubiquitin-protein ligase (Fragment)	Q571M5	0.0731871	0.0979082	0.0773584	0.0828179	0.00764062	0.0042022
Rb1cc1	RB1-inducible coiled-coil protein 1	Q9ESK9	0.109074	0.142323	0.14937	0.133589	0.0124251	0.00427006
Napg	Putative uncharacterized protein	Q8C1T5	0.277118	0.355225	0.266699	0.299681	0.0279347	0.00428869
Thumpd1	THUMP domain-containing protein 1	Q99J36	-0.167504	-0.217898	-0.165602	-0.183668	0.0171241	0.0042904
Gpx4	Phospholipid hydroperoxide glutathione peroxidase, mitochondrial	O70325	-0.322425	-0.313798		-0.318111	0.0043133	0.00431572
Nop2	Putative ribosomal RNA methyltransferase NOP2	E9QN31	-0.384161	-0.299459	-0.287846	-0.323822	0.0303553	0.00433656
Psme1	Proteasome activator complex subunit 1	P97371	0.509246	0.390299	0.38675	0.428765	0.0402538	0.00434959
Slc7a5	Putative uncharacterized protein	Q3UQM7	-0.454777	-0.335882	-0.360287	-0.383649	0.0362554	0.00440634
Rbm5	RNA-binding protein 5	Q91YE7	-0.149747	-0.191421	-0.142478	-0.161215	0.0152477	0.00441352
Snrnp200	U5 small nuclear ribonucleoprotein 200 kDa helicase	Q6P4T2	-0.0885119	-0.100681	-0.122117	-0.10377	0.00982322	0.00442124
Dync1h1	Cytoplasmic dynein 1 heavy chain 1	Q9JHU4	0.211244	0.183612	0.151564	0.18214	0.0172438	0.00442213
Igf2bp1	Insulin-like growth factor 2 mRNA-binding protein 1	O88477	-0.253347	-0.346185	-0.277792	-0.292441	0.027783	0.00445266
2700097O09Rik	Protein 2700097O09Rik	Q6PGK3	-0.236557	-0.177158	-0.182839	-0.198852	0.0189241	0.00446777
Rps16	40S ribosomal protein S16	P14131	-0.284334	-0.214759	-0.296272	-0.265122	0.025416	0.00453269
Mki67ip	MKI67 FHA domain-interacting nucleolar phosphoprotein	Q91VE6	-0.404107	-0.309747	-0.302623	-0.338826	0.0327053	0.00459447
Ddx52	Putative uncharacterized protein (Fragment)	Q3TKX4	-0.218645	-0.175938	-0.158549	-0.184377	0.0178542	0.00462358
Eef1a1	Elongation factor 1-alpha 1	P10126	-0.0256205	-0.0359837	-0.0308377	-0.030814	0.00299161	0.00464726
Psip1	PC4 and SFRS1-interacting protein	Q99JF8	0.164594	0.1166	0.146698	0.14263	0.014003	0.00475075
Srm	Putative uncharacterized protein	Q3UJL7	-0.242354	-0.173002	-0.227677	-0.214344	0.0211009	0.00477627
Mrgbp	MCG6726, isoform CRA_f	Q14AR7	-0.434525		-0.448061	-0.441293	0.00676829	0.00488167
Nme7	Non-metastatic cells 7, protein expressed in, isoform CRA_c	Q3UMG6	0.211442	0.14874	0.180004	0.180062	0.0181004	0.00497716
Ralgapb	Ral GTPase-activating protein subunit beta	Q8BQZ4	0.390317	0.285123	0.396252	0.357231	0.0360944	0.00502763
Ncl	Nucleolin	P09405	-0.382028	-0.267356	-0.328993	-0.326126	0.0331339	0.00508257
Ktn1	Kinectin	F8VQC7	-0.0731455	-0.0514209	-0.0676474	-0.0640713	0.00652127	0.00510061
Fam111a	Putative uncharacterized protein (Fragment)	Q3UQF7	0.794465	0.74183	0.558473	0.698256	0.071524	0.00516504
Sp1	Transcription factor Sp1	O89090	-0.379761	-0.545915	-0.479617	-0.468431	0.0482894	0.0052303
Fsd1l	FSD1-like protein	Q8BYN5	3.0551	2.70481	3.82084	3.19358	0.329527	0.00523995
Mtif2	Translation initiation factor IF-2, mitochondrial	Q91YJ5	-0.536553	-0.434043	-0.377538	-0.449378	0.0465396	0.00527804
Rpl10	Putative uncharacterized protein	Q3THJ6	-0.1397	-0.0963915	-0.1256	-0.120564	0.0127531	0.00550238
Ccnd1	G1/S-specific cyclin-D1	P25322	-0.515548	-0.516107	-0.367183	-0.466279	0.0495482	0.00555205
Mybbp1a	MYB binding protein (P160) 1a, isoform CRA_b	Q3U2W2	-0.319311	-0.238301	-0.232317	-0.26331	0.0280538	0.00558086
Sbno1	Protein strawberry notch homolog 1	Q689Z5	-0.167231	-0.243456	-0.21094	-0.207209	0.0220834	0.00558419
Mccc2	Methylcrotonoyl-CoA carboxylase beta chain, mitochondrial	Q3ULD5	0.271429	0.195566	0.27868	0.248559	0.0265787	0.00562094
Usp7	Ubiquitin carboxyl-terminal hydrolase 7	Q6A4J8	-0.154379	-0.138703	-0.197191	-0.163424	0.0174794	0.00562359
Cap1	Adenylyl cyclase-associated protein 1	P40124	0.0750214	0.0976885	0.0693647	0.0806915	0.00865395	0.00565364
Wdr11	WD repeat-containing protein 11	Q8K1X1	0.227651	0.268749	0.184254	0.226885	0.0243947	0.00568194
Ero1l	Ero1l protein	Q4FJZ3	-0.0854125	-0.12002	-0.0912888	-0.0989072	0.010692	0.0057425
Krt42	Keratin, type I cytoskeletal 42	Q6IFX2	-9.04787	-9.0867	-6.41059	-8.18172	0.885635	0.00575756
Mrrf	Ribosome-recycling factor, mitochondrial	Q9D6S7	-0.216484	-0.159862	-0.232178	-0.202841	0.0219623	0.00576043
Prrc1	Protein PRRC1	Q3UPH1	-0.33647		-0.349005	-0.342737	0.0062674	0.00582006
Snx16	Sorting nexin-16	Q3TLM7	0.28236	0.229591	0.193916	0.235289	0.0256903	0.00585627
Mela	Gag-Pol polyprotein	P70355	0.708419	0.682737		0.695578	0.0128412	0.0058757
Polr1a	DNA-directed RNA polymerase I subunit RPA1	O35134	-0.198668	-0.218647	-0.283781	-0.233699	0.0256968	0.00593782
Sorbs3	Sorbs3 protein	Q8K0M3	0.268612	0.311692	0.211342	0.263882	0.0290649	0.00595759
Ubtf	Nucleolar transcription factor 1	P25976	-0.294907	-0.219304	-0.210888	-0.2417	0.0267144	0.00599842
Znf330	Zinc finger protein 330	Q922H9	0.139111	0.120509	0.0941235	0.117915	0.0130515	0.00601539
Rpl15	Ribosomal protein L15	Q3U7D2	-0.225638	-0.152804	-0.201615	-0.193352	0.0214274	0.00602975
Adat1	tRNA-specific adenosine deaminase 1	Q9JHI2	0.181629	0.225804	0.268348	0.225261	0.0250352	0.00606382
Eif3l	Eukaryotic translation initiation factor 3 subunit L	Q8QZY1	-0.0999284	-0.0849445	-0.0674635	-0.0841122	0.00938104	0.00610579
Ndufa10	NADH dehydrogenase [ubiquinone] 1 alpha subcomplex subunit 10, mitochondrial	Q99LC3	-0.19212	-0.12965	-0.16178	-0.161183	0.0180363	0.0061455
Rangap1	Ran GTPase-activating protein 1	P46061	-0.0988591	-0.0921627	-0.131151	-0.107391	0.0120362	0.00616487
Gnl3	Putative uncharacterized protein	Q3TK27	-0.341548	-0.325822	-0.233372	-0.300247	0.0337444	0.00619841
Ccdc23	Coiled-coil domain-containing protein 23	Q99LQ4	0.643547		0.66917	0.656359	0.0128112	0.00621218
Pgm2	Phosphoglucomutase 2	Q5RJV4	0.352955	0.239248	0.285535	0.292579	0.033013	0.00624677
Prc1	Protein regulator of cytokinesis 1	Q99K43	0.347152	0.282891	0.234682	0.288242	0.0325775	0.00626708
Heatr1	HEAT repeat containing 1	G3X9B1	-0.447206	-0.299672	-0.382295	-0.376391	0.0426917	0.00631094
Tcea1	Transcription elongation factor A protein 1	P10711	-0.257454	-0.172116	-0.219908	-0.216493	0.0246942	0.00638111
Zfr	Zinc finger RNA-binding protein	O88532	-0.342023	-0.271674	-0.23195	-0.281882	0.0321825	0.00639268
Rassf1	Ras association domain-containing protein 1	Q99MK9	0.367496	0.246507	0.334354	0.316119	0.036097	0.00639464
Coro1c	Coronin	Q3TEU8	0.0988653	0.0723059	0.107762	0.0929778	0.0106502	0.00643401
Rmi2	RecQ-mediated genome instability protein 2	Q3UPE3		-0.129692	-0.124515	-0.127103	0.00258832	0.00648112
Pes1	Pescadillo homolog	Q5SQ20	-0.309564	-0.23522	-0.353258	-0.299347	0.0344556	0.00649549
Mcm5	DNA replication licensing factor MCM5	P49718	0.0729087	0.0496598	0.0566435	0.0597373	0.00688736	0.0065167
Cdkal1	Threonylcarbamoyladenosine tRNA methylthiotransferase	Q91WE6	-0.645394	-0.463601	-0.691113	-0.600036	0.0694826	0.00657261
Mecom	MDS1 and EVI1 complex locus protein EVI1	P14404	-0.416676	-0.279104	-0.335947	-0.343909	0.0399127	0.00660141
Ddx49	Probable ATP-dependent RNA helicase DDX49	Q4FZF3	-0.403488	-0.278116	-0.405402	-0.362336	0.0421134	0.00662059
Taf6	Transcription initiation factor TFIID subunit 6	Q62311	-0.407302	-0.47508	-0.603886	-0.495423	0.0576533	0.00663671
S100a4	Protein S100-A4	P07091	0.277388	0.403417	0.30178	0.327529	0.0385923	0.00680052
Suox	Sulfite oxidase, mitochondrial	Q8R086	0.161096	0.218647	0.244626	0.208123	0.0246807	0.00688651
Spast	Spastin	Q9QYY8	-0.157522	-0.175403	-0.115536	-0.149487	0.0177431	0.00689859
Smarcd3	SWI/SNF-related matrix-associated actin-dependent regulator of chromatin subfamily D member 3	Q6P9Z1	0.594923	0.655118	0.871708	0.70725	0.0840452	0.0069146
Tcf20	MKIAA0292 protein (Fragment)	Q80U46	-0.193827	-0.201386	-0.134844	-0.176686	0.0210344	0.00693925
Mad2l1	Putative uncharacterized protein	Q3TV93	-0.0454968	-0.0683836	-0.0537787	-0.0558864	0.00669035	0.00701521
Spg11	Spatacsin	Q3UHA3	1.03632	0.714689	0.760213	0.837075	0.100487	0.00705341
Trmt10c	Mitochondrial ribonuclease P protein 1	Q3UFY8	-0.165507	-0.197113	-0.249691	-0.204104	0.024552	0.00708169
Arhgdia	Rho GDP-dissociation inhibitor 1	Q99PT1	0.116753	0.0890993	0.136699	0.114184	0.0138008	0.00714791
S100a9	Protein S100-A9	P31725		-5.52662	-5.78326	-5.65494	0.128323	0.00722192
Rheb	RHEB-like protein	Q540E6	0.168732	0.129146	0.112259	0.136712	0.0167356	0.00732842
Ndufaf2	Mimitin, mitochondrial	Q59J78	-0.0944363	-0.0793069	-0.120505	-0.0980829	0.012032	0.00735844
Gmps	GMP synthase [glutamine-hydrolyzing]	Q3THK7	-0.282925	-0.185902	-0.268674	-0.245834	0.0302468	0.00740149
Trmt6	tRNA (adenine(58)-N(1))-methyltransferase non-catalytic subunit TRM6	Q8CE96	-0.191443	-0.228244	-0.291501	-0.237062	0.0292188	0.00742693
Tada1	Transcriptional adapter 1	Q99LM9	-0.0909304		-0.0952786	-0.0931045	0.00217415	0.00743172
Net1	Putative uncharacterized protein	Q3USZ7	-0.428638		-0.449224	-0.438931	0.010293	0.00746306
Ahnak	Protein Ahnak	E9Q616	-0.0572951	-0.0876089	-0.0824704	-0.0757915	0.0093664	0.00746556
Trub2	Probable tRNA pseudouridine synthase 2	Q91WG3	-0.781343	-0.523684	-0.784866	-0.696631	0.0864794	0.00753165
Maea	Macrophage erythroblast attacher	Q4VC33	0.36576	0.262572	0.251096	0.293143	0.0364594	0.0075595
Plcg1	Plcg1	Q2M4I9	0.119864	0.0981455	0.15103	0.123013	0.0153475	0.00760574
Ppip5k2	Inositol hexakisphosphate and diphosphoinositol-pentakisphosphate kinase 2	Q6ZQB6		-0.589647	-0.561677	-0.575662	0.0139853	0.00773161
Apoa1bp	NAD(P)H-hydrate epimerase	Q8K4Z3	0.220916	0.210393		0.215655	0.0052615	0.00776451
Rab35	RAB35, member RAS oncogene family	Q3U0T9	-0.347004	-0.330401		-0.338702	0.00830195	0.00780055
Dpp7	Dipeptidyl peptidase 2	Q9ET22	0.601532	0.595037	0.396039	0.530869	0.067441	0.00787921
Wdr46	WD repeat-containing protein 46	Q9Z0H1	-0.51203	-0.340114	-0.517047	-0.456397	0.0581594	0.00792684
Atp6v1f	V-type proton ATPase subunit F	Q9D1K2	0.246133	0.183881	0.162091	0.197368	0.0251808	0.00794522
Manf	Arginine-rich, mutated in early stage tumors, isoform CRA_b	Q3TMX5	0.106569	0.135361	0.16686	0.136263	0.0174104	0.00796806
Akap10	A-kinase anchor protein 10, mitochondrial	O88845	0.463551	0.419671	0.295738	0.392987	0.0502474	0.007979
Cabin1	Calcineurin binding protein 1, isoform CRA_a	G3X8Q1	-0.177061	-0.214458	-0.2747	-0.222073	0.0284421	0.00800519
Plk1	Serine/threonine-protein kinase PLK1	Q07832	-0.322373	-0.394367	-0.251063	-0.322601	0.0413683	0.00802454
Plod2	Putative uncharacterized protein	Q3U055	0.330214	0.499496	0.367089	0.398933	0.0513958	0.00809795
Osbpl9	Oxysterol-binding protein-related protein 9	A2A8Z1	0.236943	0.160142	0.249544	0.215543	0.0279381	0.00819439
Azi1	5-azacytidine-induced protein 1	Q62036	0.429043	0.346912	0.54435	0.440102	0.057263	0.00825563
Hmmr	Hyaluronan mediated motility receptor	Q00547	0.123891	0.0953153	0.151181	0.123462	0.0161284	0.0083202
Sbds	Ribosome maturation protein SBDS	P70122	0.125498	0.158395	0.198534	0.160809	0.021118	0.0084061
Coro7	Coronin-7	Q9D2V7	0.360008	0.226752	0.289489	0.292083	0.0384895	0.00846263
Gsn	Putative uncharacterized protein	Q3U9Q8	0.390145	0.324934	0.244331	0.319803	0.0421709	0.0084738
Ptprk	Receptor-type tyrosine-protein phosphatase kappa	P35822	-0.35566	-0.376174	-0.238852	-0.323562	0.0427671	0.00851282
Try10	MCG140784	Q792Z1	-7.01339	-10.7324	-10.8835	-9.54312	1.26562	0.00856875
Acsf2	Acyl-CoA synthetase family member 2, mitochondrial	Q8VCW8	0.40219	0.473271	0.62733	0.50093	0.0664473	0.00857213
Txnl1	Putative uncharacterized protein	Q3U8R9	-0.181774	-0.113533	-0.150202	-0.148503	0.0197177	0.00858836
Lman1	Putative uncharacterized protein	Q3U944	0.126624	0.197128	0.147564	0.157105	0.0209043	0.00862404
Dhx29	ATP-dependent RNA helicase Dhx29	Q6PGC1	-0.0568996	-0.075388	-0.0913715	-0.074553	0.00995996	0.00869187
Pc	Pyruvate carboxylase, mitochondrial	Q05920	0.465563	0.309885	0.327491	0.367646	0.0492214	0.00872829
Pop1	Processing of 1, ribonuclease P/MRP family, (S. cerevisiae)	Q8K205	-0.423933	-0.293751	-0.471272	-0.396318	0.0530733	0.00873252
Cct4	T-complex protein 1 subunit delta	P80315	-0.19125	-0.237868	-0.148542	-0.192553	0.0257945	0.00873818
Dohh	Deoxyhypusine hydroxylase	Q99LN9	-0.339891	-0.230303	-0.233502	-0.267898	0.036008	0.00879528
Fam107b	Protein FAM107B	Q3TGF2	-0.235854	-0.188315	-0.147191	-0.190453	0.0256173	0.00880772
Bcl7c	B-cell CLL/lymphoma 7 protein family member C	O08664		-0.627956	-0.663883	-0.645919	0.0179637	0.00885027
Tfrc	Transferrin receptor, isoform CRA_a	Q542D9	-0.51455	-0.320484	-0.411884	-0.415639	0.0560536	0.00885296
Nop16	Nucleolar protein 16	Q9CPT5	-0.631147	-0.391214	-0.513432	-0.511931	0.0692669	0.00890979
Itga7	Putative uncharacterized protein	Q3TZS3	0.783812	1.20393	0.861815	0.949852	0.129019	0.00897732
Ckap5	Cytoskeleton-associated protein 5	A2AGT5	-0.168671	-0.121094	-0.109466	-0.133077	0.0181108	0.00901096
Micall2	JRAB	Q3TN34	0.544116	0.364621	0.372446	0.427061	0.058571	0.00914763
Prkaa1	Prkaa1 protein	Q3TUQ7	-0.206712	-0.338335	-0.297042	-0.280697	0.0388652	0.00931845
Krt76	Keratin, type II cytoskeletal 2 oral	Q3UV17	-4.70414	-7.12647	-7.60009	-6.4769	0.89686	0.00931985
Fkbp1a	Peptidyl-prolyl cis-trans isomerase FKBP1A	P26883	-0.230334	-0.324029	-0.208407	-0.254257	0.0354558	0.00944827
Arhgef40	Rho guanine nucleotide exchange factor 40	Q3UPH7	0.195743	0.25874	0.160839	0.205108	0.0286468	0.00947706
Smarca4	Transcription activator BRG1	Q3TKT4	-0.134549	-0.0855803	-0.136197	-0.118775	0.0166044	0.00949408
Cct5	T-complex protein 1 subunit epsilon	P80316	-0.205148	-0.126512	-0.157568	-0.163076	0.0228665	0.00955004
Eef1e1	Eukaryotic translation elongation factor 1 epsilon-1	Q9D1M4	-0.103234	-0.159636	-0.111066	-0.124645	0.0176407	0.00972377
Gdi1	Rab GDP dissociation inhibitor alpha	P50396	0.145519	0.188798	0.115633	0.149983	0.0212386	0.00973439
Synj1	Synaptojanin-1	D3Z656	0.265118	0.160246	0.235981	0.220448	0.0312543	0.00975699
Ncapg2	Condensin-2 complex subunit G2	Q6DFV1	0.273096	0.237487	0.377627	0.29607	0.042054	0.00979239
Idh1	Isocitrate dehydrogenase [NADP] cytoplasmic	O88844	0.130748	0.197628	0.215899	0.181425	0.0258818	0.00987521
Gm17415	Protein Gm17415	F6YI27	-4.46284	-4.43352	-6.66859	-5.18832	0.740183	0.00987594
Evi5	Ecotropic viral integration site 5 protein	P97366	-0.428295		-0.455757	-0.442026	0.0137313	0.00988494
Phgdh	D-3-phosphoglycerate dehydrogenase	Q61753	-0.20525	-0.137407	-0.227809	-0.190155	0.0271662	0.00990282
Kiaa0020	Pumilio domain-containing protein KIAA0020	Q8BKS9	-0.671467	-0.40311	-0.552416	-0.542331	0.0776321	0.00994078
Etfdh	Electron transfer flavoprotein-ubiquinone oxidoreductase, mitochondrial	Q921G7	0.375401	0.231872	0.277368	0.29488	0.0423481	0.0100037
Anks3	Anks3 protein (Fragment)	Q8R5E8	0.998227		1.06307	1.03065	0.0324224	0.0100102
Raly	HnRNP-associated with lethal yellow, isoform CRA_f	Q3U3F6	-0.4232	-0.301948	-0.504914	-0.410021	0.0589606	0.0100291
Trim2	Putative uncharacterized protein (Fragment)	Q3TPI3	0.314721	0.404461	0.24437	0.321184	0.046327	0.0100885
Mcat	Malonyl-CoA-acyl carrier protein transacylase, mitochondrial	Q8R3F5	-0.576015	-0.607855	-0.369029	-0.517633	0.0748684	0.0101426
Fam208b	Protein FAM208B	Q5DTT3	-0.476859	-0.798736	-0.654386	-0.643327	0.0930824	0.0101498
Serpine1	Plasminogen activator inhibitor 1	P22777	0.369325	0.585675	0.412655	0.455885	0.0660893	0.010188
Safb	Scaffold attachment factor B1	D3YXK2	-0.156098	-0.0970482	-0.11195	-0.121699	0.0177295	0.0102855
Myl9	Myosin regulatory light polypeptide 9	Q9CQ19	1.23361	0.782772	0.855607	0.95733	0.139731	0.0103233
Filip1l	Filamin A-interacting protein 1-like	Q6P6L0	-0.188133	-0.138336	-0.232585	-0.186351	0.0272219	0.0103396
Gtl3	UPF0468 protein C16orf80 homolog	Q8BTU1	-0.261293	-0.396658	-0.439087	-0.365679	0.0536113	0.0104123
Ctsz	Cathepsin Z, isoform CRA_b	Q545I6	0.160307	0.269091	0.213232	0.21421	0.031407	0.0104138
Pgrmc1	Membrane-associated progesterone receptor component 1	O55022	0.113688	0.1181	0.0715206	0.101103	0.014846	0.0104444
Cenpf	Protein Cenpf	E9Q3P4	0.181348	0.237889	0.304458	0.241231	0.0355781	0.0105335
Alb	Serum albumin	P07724	-6.90218	-7.3769		-7.13954	0.237359	0.0105785
Sfxn3	Sideroflexin-3	Q3U4F0	0.858692	0.556457	0.573292	0.662814	0.0980598	0.0105971
Gpi	Glucose-6-phosphate isomerase	P06745	0.034437	0.0415469	0.0244547	0.0334795	0.00495724	0.0106142
Mt1	Metallothionein-1	P02802	0.412014	0.690573	0.531237	0.544608	0.0806904	0.0106273
Blvra	Biliverdin reductase A	Q9CY64	0.16763	0.155627	0.245475	0.189577	0.0281628	0.010682
Ercc6l	DNA excision repair protein ERCC-6-like	Q8BHK9	-0.112653	-0.0661313	-0.0947553	-0.0911799	0.0135482	0.0106864
Aprt	Adenine phosphoribosyltransferase	P08030	-0.255824	-0.371012	-0.233356	-0.286731	0.0426368	0.0107021
Ubqln1	Putative uncharacterized protein	Q3T992		-0.26284	-0.245589	-0.254215	0.00862581	0.0107965
Papss1	3'-phosphoadenosine 5'-phosphosulfate synthase 1, isoform CRA_b	Q3U647	0.191065	0.178362	0.113384	0.160937	0.0240577	0.0108118
Bcar1	Putative uncharacterized protein	Q3TIT7	-0.383012	-0.463894	-0.271081	-0.372662	0.0559004	0.0108844
Yrdc	YrdC domain-containing protein, mitochondrial	Q3U5F4	-0.170281	-0.270073	-0.183478	-0.207944	0.0312974	0.0109555
S100a6	Protein S100-A6	P14069	0.0988975	0.125058	0.0733775	0.0991109	0.0149192	0.0109585
Carm1	Histone-arginine methyltransferase CARM1	Q9WVG6	-0.172471	-0.161915	-0.255753	-0.196713	0.0296769	0.0110057
Sh3gl1	Putative uncharacterized protein	Q3TJB4	0.0808664	0.0741831	0.11842	0.0911564	0.0137675	0.0110292
Polr3b	DNA-directed RNA polymerase III subunit RPC2	P59470	-0.38576	-0.253749	-0.248648	-0.296052	0.0448779	0.011108
Pcyox1	Putative uncharacterized protein	Q3TVT6	0.336272	0.520751	0.339135	0.398719	0.0610214	0.0113151
Ola1	Putative uncharacterized protein	Q3TJF2	-0.120268	-0.175774	-0.20884	-0.168294	0.0258408	0.011387
Aldh5a1	Succinate-semialdehyde dehydrogenase, mitochondrial	Q8BWF0	0.66879	1.0418	1.15563	0.955406	0.147027	0.0114363
Sh3glb2	Endophilin-B2	A2AWI9	0.477099		0.512712	0.494906	0.0178064	0.0114477
Nup54	Nuclear pore complex protein Nup54	Q8BTS4	-0.38903	-0.232342	-0.280193	-0.300522	0.0463599	0.0114902
Eif3b	Eukaryotic translation initiation factor 3 subunit B	Q8CIJ3	-0.152682	-0.147707	-0.232425	-0.177605	0.0274479	0.0115305
Usp36	Ubiquitin carboxyl-terminal hydrolase 36	B1AQJ2	-0.324857	-0.194989	-0.328238	-0.282695	0.0438637	0.0116197
Tbl3	Transducin beta-like protein 3	Q8C4J7	-0.154765	-0.236736	-0.27014	-0.220547	0.0342753	0.0116556
Nuf2	Kinetochore protein Nuf2	Q99P69	0.372577	0.221928	0.371554	0.322019	0.0500468	0.0116563
Flot2	Putative uncharacterized protein	Q3UEG9	0.127053	0.169448	0.0988778	0.131793	0.0205092	0.0116855
Cnot2	Putative uncharacterized protein	Q3TIJ0	-0.289134	-0.336256	-0.191961	-0.272451	0.0424814	0.01173
Rpl14	Ribosomal protein L14	Q569Z0	-0.202039	-0.188705	-0.303064	-0.231269	0.0361032	0.0117569
Ddx50	DEAD (Asp-Glu-Ala-Asp) box polypeptide 50	Q5BKP5	0.632036	0.420856	0.393889	0.482261	0.0752915	0.0117588
Wdr77	Methylosome protein 50	Q99J09	-0.186979	-0.10703	-0.166559	-0.153523	0.0239818	0.0117717
Edc3	Enhancer of mRNA-decapping protein 3	Q8K2D3	-0.104719	-0.119844	-0.173458	-0.132674	0.0208545	0.011914
Arid2	Protein Arid2	E9Q7E2	-0.642615	-0.474888	-0.374236	-0.497246	0.0782768	0.0119483
Acp1	Acid phosphatase 1, soluble	Q4VAI2	-0.0949822	-0.0583041	-0.10126	-0.0848487	0.0133955	0.0120148
Ebna1bp2	Probable rRNA-processing protein EBP2	Q9D903	-0.494791	-0.279969	-0.406674	-0.393811	0.0623464	0.0120796
BC027231	Protein BC027231	Q8R2U2	-0.36737	-0.522634	-0.31051	-0.400171	0.0633932	0.0120943
Copz1	Coatomer subunit zeta-1	P61924	0.0482683	0.0595322	0.0336961	0.0471655	0.00747859	0.0121157
Otud7b	OTU domain-containing protein 7B	B2RUR8		0.13873	0.128476	0.133603	0.00512691	0.0122089
Carkd	ATP-dependent (S)-NAD(P)H-hydrate dehydratase	Q9CZ42	0.129759	0.217042	0.149985	0.165595	0.0263778	0.0122235
Ube2k	Ubiquitin-conjugating enzyme E2 K	P61087		-0.20222	-0.218385	-0.210302	0.00808238	0.0122273
Pa2g4	Proliferation-associated protein 2G4	P50580	-0.362463	-0.203925	-0.307937	-0.291442	0.0465034	0.0122638
Wdr12	WD repeat domain 12	Q4V9X1	-0.523621	-0.324482	-0.343809	-0.397304	0.0634043	0.0122672
Riok2	Serine/threonine-protein kinase RIO2	Q9CQS5	-0.381254	-0.317213	-0.539152	-0.41254	0.0659505	0.0123084
Nadk	NAD kinase	P58058	-0.773883	-0.448139	-0.555557	-0.592526	0.0958339	0.0125877
Rlim	E3 ubiquitin-protein ligase RLIM	Q9WTV7	-0.483808	-0.361276	-0.275526	-0.373536	0.0604376	0.0125968
Lcmt2	Leucine carboxyl methyltransferase 2	Q8BYR1	-0.452414	-0.803596	-0.620575	-0.625528	0.101408	0.0126443
Sel1l	Sel-1 suppressor of lin-12-like (C. elegans)	Q6GTY4	0.472057	0.281634	0.319882	0.357857	0.0581574	0.0127045
Vps16	Putative uncharacterized protein	Q8BWV2	0.498363	0.369524	0.282996	0.383627	0.0625699	0.0127927
Pddc1	Parkinson disease 7 domain-containing protein 1	Q8BFQ8	0.219237	0.129881	0.149357	0.166158	0.0271283	0.0128178
Mrpl50	39S ribosomal protein L50, mitochondrial	Q8VDT9	-0.112621	-0.0930563	-0.160218	-0.121965	0.019943	0.0128551
Vdac3	Putative uncharacterized protein (Fragment)	Q3UFA8	0.310393	0.418137	0.236809	0.32178	0.0526536	0.012873
Arhgef28	Rho guanine nucleotide exchange factor 28	P97433	0.27306	0.494295	0.412812	0.393389	0.0645992	0.0129608
Mad1l1	Mitotic spindle assembly checkpoint protein MAD1	Q9WTX8	-0.198098	-0.113569	-0.195654	-0.169107	0.0277779	0.0129684
Naa50	N-alpha-acetyltransferase 50	Q6PGB6	-0.3557	-0.215877	-0.386928	-0.319502	0.0525907	0.0130201
S100a13	Protein S100-A13	P97352	0.20329	0.220765		0.212028	0.00873774	0.0131103
Mkln1	Muskelin	O89050	-0.59548	-0.482891	-0.328254	-0.468875	0.0774593	0.0131115
Tsfm	Elongation factor Ts, mitochondrial	Q3TA37	0.154165	0.250423	0.160283	0.18829	0.0311166	0.0131201
Dnpep	Putative uncharacterized protein	Q3TVK3	0.227935	0.143041	0.259385	0.210121	0.0347466	0.0131364
Pdhx	Pyruvate dehydrogenase protein X component, mitochondrial	Q8BKZ9	0.0525738	0.0612093	0.0897087	0.0678306	0.0112195	0.0131424
Clybl	Citrate lyase subunit beta-like protein, mitochondrial	Q8R4N0	0.365398	0.222459	0.401127	0.329661	0.0545845	0.0131688
Camkk1	Calcium/calmodulin-dependent protein kinase kinase 1	Q8VBY2	2.37378	2.18082	1.31762	1.95741	0.324709	0.0132162
Magi3	Membrane-associated guanylate kinase, WW and PDZ domain-containing protein 3	Q9EQJ9	0.236481	0.254168	0.390755	0.293801	0.0487451	0.0132199
Cct2	T-complex protein 1 subunit beta	P80314	-0.347932	-0.195694	-0.334508	-0.292711	0.0486634	0.0132718
Uqcrq	Cytochrome b-c1 complex subunit 8	Q9CQ69	-0.0820469		-0.0891923	-0.0856196	0.0035727	0.0132746
Edem2	Putative uncharacterized protein	Q8BJR2	0.27249		0.250646	0.261568	0.0109222	0.0132839
Gtpbp8	Putative uncharacterized protein	Q8C5J2	0.10704		0.0984205	0.10273	0.00430963	0.0133456
Lgals1	Galectin-1	P16045	-0.0424853	-0.0458405	-0.025405	-0.0379103	0.0063272	0.0133715
Usp8	Ubiquitin carboxyl-terminal hydrolase (Fragment)	Q3UQ26	0.337119	0.257124	0.186622	0.260288	0.0434736	0.0133902
Dera	Putative uncharacterized protein	Q3THN2	-0.84806	-0.922655		-0.885357	0.0372977	0.0134016
Atic	Bifunctional purine biosynthesis protein PURH	Q9CWJ9	-0.231214	-0.143346	-0.144827	-0.173129	0.0290456	0.0135055
Fam32a	Protein FAM32A	Q9CR80	-0.208947	-0.240173	-0.357165	-0.268762	0.0451116	0.0135181
Dpp3	Putative uncharacterized protein	Q3THP1	0.0660519	0.0551675	0.0958675	0.0723623	0.0121654	0.0135596
Vcl	Vinculin	Q64727	0.0976721	0.149375	0.088789	0.111945	0.0188896	0.013656
Eif2s3x	Eukaryotic translation initiation factor 2, subunit 3, structural gene X-linked	Q3TML6	-0.0876935	-0.16186	-0.135658	-0.128404	0.0217151	0.0137144
Eps15l1	Epidermal growth factor receptor substrate 15-like 1	Q60902	0.152704	0.0834115	0.118523	0.118213	0.0200035	0.0137301
Clic4	Clic4 protein	Q543N5	0.23525	0.305071	0.166889	0.235737	0.0398905	0.0137301
Nucb2	Nucleobindin-2	P81117	0.375796	0.204671	0.337317	0.305928	0.0518328	0.0137631
Ftsj3	pre-rRNA processing protein FTSJ3	Q9DBE9	-0.406878	-0.284445	-0.230779	-0.307367	0.0521112	0.0137806
Vwa5a	von Willebrand factor A domain-containing protein 5A	Q99KC8	-0.743547	-0.414893	-0.537712	-0.565384	0.0958778	0.0137868
Lrrc20	Leucine-rich repeat-containing protein 20	Q8CI70	0.650492	0.469647	0.362258	0.494132	0.0841017	0.0138837
Mov10	Putative helicase MOV-10	P23249	0.183499	0.298456	0.18581	0.222588	0.0379396	0.0139223
Cyb561d2	Cytochrome b561 domain-containing protein 2	Q9WUE3	-0.271629		-0.296687	-0.284158	0.0125294	0.0140262
Eml2	Echinoderm microtubule-associated protein-like 2	Q7TNG5	0.358655	0.201698	0.250478	0.270277	0.0463785	0.0141027
Nck1	Cytoplasmic protein NCK1	Q99M51	0.1693	0.0921332	0.127731	0.129721	0.0222984	0.0141497
Fam195a	Protein FAM195A	Q9CQB2	-0.229927	-0.128326	-0.228416	-0.195556	0.0336181	0.0141522
Herc4	Probable E3 ubiquitin-protein ligase HERC4	Q6PAV2	-0.0640174	-0.11878	-0.0924616	-0.091753	0.0158125	0.0142198
Nde1	Nuclear distribution protein nudE homolog 1	Q9CZA6	0.130762	0.200997	0.117574	0.149778	0.0258913	0.0143031
Sf3b2	Putative uncharacterized protein	Q3UAI4	-0.30936	-0.324897	-0.177157	-0.270471	0.0468723	0.0143719
Trim65	Tripartite motif-containing protein 65	Q8BFW4	-1.40046	-1.27932		-1.33989	0.0605673	0.0143788
F3	Tissue factor	P20352	0.671886	0.934202	0.511688	0.705925	0.123151	0.0145558
Dck	Deoxycytidine kinase	P43346	0.437133	0.790458	0.787285	0.671625	0.11725	0.0145754
Pabpc1	Polyadenylate-binding protein 1	P29341	-0.414115	-0.219742	-0.3367	-0.323519	0.0564963	0.0145841
Sgms2	Phosphatidylcholine:ceramide cholinephosphotransferase 2	Q9D4B1	-0.338386	-0.186495	-0.239602	-0.254828	0.0445031	0.0145855
Gtf2h2	General transcription factor II H, polypeptide 2	Q7TPV0	-0.10377		-0.113799	-0.108785	0.00501479	0.0146632
Bub1b	Mitotic checkpoint serine/threonine-protein kinase BUB1 beta	Q9Z1S0	-0.169173	-0.0934671	-0.118325	-0.126988	0.0222797	0.0147148
Ddx47	DEAD (Asp-Glu-Ala-Asp) box polypeptide 47	Q4VBG1	-0.352228	-0.45543	-0.24185	-0.349836	0.0616669	0.0148477
Capn7	Calpain-7	Q9R1S8	0.192769	0.322335	0.199806	0.238303	0.0420647	0.014887
Ppa1	Pyp protein	Q4FK49	-0.256873	-0.215192	-0.134947	-0.202337	0.0357791	0.0149372
Nmi	N-myc-interactor	O35309	0.663298		0.603785	0.633541	0.0297565	0.0149396
Srsf10	Serine/arginine-rich-splicing factor 10	Q3TFP0	-0.159759	-0.0844419	-0.124919	-0.12304	0.0217624	0.0149442
Dlgap5	Putative uncharacterized protein	Q3UX88	0.298761	0.213759	0.162292	0.224937	0.0397898	0.0149475
Rabgef1	Rab5 GDP/GTP exchange factor	Q9JM13	0.298083	0.271513	0.157992	0.242529	0.0429589	0.0149856
Elavl1	ELAV-like protein 1	P70372	-0.178966	-0.105779	-0.20081	-0.161852	0.0287368	0.0150538
Fads2	Fatty acid desaturase 2	Q9Z0R9	-0.653768	-0.810414	-0.424674	-0.629619	0.112006	0.0151097
Map1b	Microtubule-associated protein 1B	P14873	0.195055	0.127102	0.242764	0.188307	0.0335588	0.0151614
Csnk2a2	Casein kinase II subunit alpha'	O54833	0.147912	0.162722		0.155317	0.00740503	0.0151646
Slc4a2	Anion exchange protein 2	P13808	-0.0949235	-0.140205	-0.0774047	-0.104178	0.0187101	0.0153871
Dhrs1	Dehydrogenase/reductase SDR family member 1	Q99L04	0.188389	0.163046	0.288738	0.213391	0.0383772	0.0154275
Thoc5	THO complex subunit 5 homolog	Q8BKT7	-0.202674	-0.11874	-0.126032	-0.149149	0.0268452	0.0154513
Nfkb2	Putative uncharacterized protein	Q3UG25	0.355784	0.314161	0.185286	0.285077	0.0513217	0.0154574
Atp5d	ATP synthase, H+ transporting, mitochondrial F1 complex, delta subunit, isoform CRA_c	Q4FK74	-0.161717	-0.14935	-0.0849557	-0.132008	0.0237953	0.015495
Tpm4	Tropomyosin alpha-4 chain	Q6IRU2	0.290301	0.165929	0.185644	0.213958	0.0385936	0.0155151
Smtn	Smoothelin	Q921U8	0.174892	0.180753	0.0963072	0.150651	0.0272244	0.0155698
Cisd3	CDGSH iron-sulfur domain-containing protein 3, mitochondrial	B1AR13	0.208571	0.267574	0.385192	0.287112	0.0519136	0.0155863
Dynlt1	Dynein light chain Tctex-type 1	P51807	0.228726	0.130015	0.146766	0.168502	0.0304975	0.0156158
St13	Putative uncharacterized protein	Q3U3N7	-0.207451	-0.183328	-0.107305	-0.166028	0.0301759	0.0157411
Stat1	Putative uncharacterized protein	Q3TW11	0.480954	0.26801	0.315335	0.354766	0.0645561	0.0157768
Vcam1	Vascular cell adhesion protein 1	P29533	-0.213657	-0.415812	-0.352396	-0.327288	0.0596921	0.0158455
Cad	Carbamoyl-phosphate synthetase 2, aspartate transcarbamylase, and dihydroorotase	B2RQC6	-0.222202	-0.114363	-0.176472	-0.171012	0.03125	0.0159038
Rps3a	40S ribosomal protein S3a	P97351	-0.160957	-0.0836147	-0.148441	-0.131005	0.0239688	0.0159414
Srpr	Signal recognition particle receptor subunit alpha	Q9DBG7	0.204984	0.393326	0.292477	0.296929	0.0544154	0.015991
Itga6	Integrin alpha-6	Q61739	-1.00074	-0.691307	-0.536739	-0.74293	0.136411	0.0160495
Gaa	Lysosomal alpha-glucosidase	P70699	0.290022	0.524533	0.556437	0.456997	0.0839943	0.0160801
Srsf3	Serine/arginine-rich splicing factor 3	P84104	-0.397894	-0.23291	-0.242308	-0.291037	0.0534972	0.0160834
Rnf213	E3 ubiquitin-protein ligase RNF213	E9Q555	0.158385	0.20559	0.105878	0.156618	0.0287978	0.016093
Csde1	Putative uncharacterized protein	Q3U1S6	-0.263804	-0.157723	-0.308751	-0.243426	0.0447727	0.016102
Gmeb1	Putative uncharacterized protein	Q3UYV4	-0.474102	-0.524946		-0.499524	0.0254222	0.0161858
Abcb1b	Multidrug resistance protein 1B	P06795	-0.587164	-0.362006	-0.71081	-0.553327	0.102103	0.0162018
Gtpbp4	Nucleolar GTP-binding protein 1	Q99ME9	-0.438333	-0.241523	-0.465251	-0.381702	0.0705192	0.0162393
Mat2a	S-adenosylmethionine synthase isoform type-2	Q3THS6	-0.334305	-0.185493	-0.358917	-0.292905	0.0541738	0.0162735
Gstm1	Glutathione S-transferase Mu 1	P10649	0.566146	0.809967	0.429334	0.601816	0.111317	0.0162761
Aplp2	Putative uncharacterized protein	Q3UDL6	-0.621995	-0.546472	-0.316554	-0.495007	0.0918514	0.0163745
Dkc1	H/ACA ribonucleoprotein complex subunit 4 (Fragment)	F6YUI5	-0.241249	-0.233364	-0.125823	-0.200145	0.0372308	0.0164523
Plk2	Serine/threonine-protein kinase PLK2	P53351	-0.50069		-0.555705	-0.528198	0.0275075	0.016562
Clic1	Chloride intracellular channel 1, isoform CRA_c	Q542F1	0.198411	0.311062	0.172748	0.227407	0.0424784	0.0165831
Ppt1	Palmitoyl-protein thioesterase 1	O88531	0.335184	0.589608	0.364615	0.429802	0.0803533	0.01661
Trappc5	Trafficking protein particle complex subunit 5	Q9CQA1	0.0438891		0.0395242	0.0417067	0.00218248	0.0166417
Drg1	Developmentally-regulated GTP-binding protein 1	P32233	-0.326783	-0.165345	-0.256518	-0.249549	0.0467334	0.0166637
Rmcf2	Envelope glycoprotein	Q505R5	-0.413501		-0.459374	-0.436438	0.0229364	0.016713
Sar1a	GTP-binding protein SAR1a	P36536		0.148352	0.133525	0.140938	0.00741364	0.0167283
Rpl27	60S ribosomal protein L27	P61358	-0.219769	-0.152438	-0.297432	-0.223213	0.0418918	0.0167322
Rwdd1	RWD domain-containing protein 1	Q9CQK7	-0.245715	-0.273029		-0.259372	0.013657	0.0167449
Ndufa4	NADH dehydrogenase [ubiquinone] 1 alpha subcomplex subunit 4	Q62425	0.271949		0.302227	0.287088	0.015139	0.0167699
Ddx18	ATP-dependent RNA helicase DDX18	Q8K363	-0.241856	-0.24815	-0.415037	-0.301681	0.0567072	0.0167821
Cdh2	Cadherin-2	P15116	0.0745289	0.116412	0.147866	0.112935	0.0212418	0.016802
Taf9	Adenylate kinase isoenzyme 6	Q8VCP8	-0.555322	-0.278842	-0.446119	-0.426761	0.0803976	0.0168534
Ctgf	Connective tissue growth factor	P29268	0.671372	0.452567	0.356577	0.493505	0.0931504	0.016915
Rap1gds1	Putative uncharacterized protein	Q3TA69	-0.15081	-0.178226	-0.0890984	-0.139378	0.0263563	0.016974
Pfkfb1	6-phosphofructo-2-kinase/fructose-2,6-bisphosphatase 1	P70266		-0.147589	-0.132594	-0.140092	0.00749717	0.0170185
Cdc5l	MCG18249, isoform CRA_a	Q3UCF2	-0.126544	-0.102471	-0.0632035	-0.0974063	0.0184594	0.017044
Acsf3	Acyl-CoA synthetase family member 3, mitochondrial	Q3URE1	0.0928602		0.0833913	0.0881258	0.00473443	0.0170843
Apaf1	Apoptotic protease-activating factor 1	O88879	0.171738	0.321949	0.336434	0.276707	0.0526509	0.0171753
Cyth3	Cytohesin-3	O08967	-0.305697	-0.158016	-0.214092	-0.225935	0.0430411	0.017214
Cnpy2	Protein canopy homolog 2	Q9QXT0	0.119158	0.0592016	0.0999685	0.092776	0.0176776	0.0172205
Acot13	Thioesterase superfamily member 2	Q4VA32	0.393785	0.353298		0.373542	0.0202434	0.0172334
Dhcr24	Delta(24)-sterol reductase	Q8VCH6	-0.492973	-0.254211	-0.344168	-0.363784	0.069619	0.0173638
Ifrd1	Interferon-related developmental regulator 1	P19182	-1.68366	-0.8677	-1.67024	-1.4072	0.269777	0.017422
Trim56	E3 ubiquitin-protein ligase TRIM56	Q80VI1	0.0942067	0.081146	0.14887	0.108074	0.0207433	0.0174605
Hnrnpa2b1	Heterogeneous nuclear ribonucleoproteins A2/B1	O88569	-0.161066	-0.30132	-0.195819	-0.219401	0.0421699	0.0175069
Nop58	Nucleolar protein 58	Q6DFW4	-0.421882	-0.482781	-0.238654	-0.381106	0.0733634	0.0175583
Lonp2	Lon protease homolog 2, peroxisomal	Q9DBN5	0.572935	0.634023	1.03143	0.746128	0.143735	0.0175824
Smarcc2	SWI/SNF complex subunit SMARCC2	Q3UID0	0.193814	0.129666	0.101518	0.141666	0.0273106	0.0176068
Sec23ip	Sec23 interacting protein	Q4G0C0	0.0515273	0.0856479	0.104716	0.0806304	0.0155579	0.0176364
Nip7	60S ribosome subunit biogenesis protein NIP7 homolog	Q9CXK8	-0.671633	-0.43107	-0.359945	-0.487549	0.0943042	0.0177182
Sf3a1	Putative uncharacterized protein	Q3TVM1	-0.118757	-0.0608571	-0.118145	-0.0992533	0.0191989	0.0177197
Irgm1	Immunity-related GTPase family M protein 1 (Fragment)	Q5NCB5	0.308236		0.344712	0.326474	0.0182376	0.0177631
Utp14a	U3 small nucleolar RNA-associated protein 14 homolog A	Q640M1	-0.267766	-0.182643	-0.364992	-0.2718	0.0526784	0.0177856
Rps15	40S ribosomal protein S15	P62843	-0.196754	-0.331493	-0.188529	-0.238926	0.0463446	0.0178131
Psme3	Proteasome activator complex subunit 3	P61290	-0.17937	-0.301194	-0.170728	-0.217097	0.0421222	0.0178224
Cox6c	Cytochrome c oxidase subunit 6C	Q9CPQ1	0.215255	0.22531	0.379871	0.273478	0.0532754	0.0179587
Ggt7	Gamma-glutamyltransferase 7	Q99JP7	0.725777	0.62145	0.353376	0.566868	0.110913	0.0181078
Rrs1	MKIAA0112 protein (Fragment)	Q80U76	-0.433341	-0.254328	-0.246815	-0.311494	0.0609616	0.0181162
Mex3c	RNA-binding E3 ubiquitin-protein ligase MEX3C	Q05A36	-0.207159		-0.232225	-0.219692	0.012533	0.0181393
Eif3h	Eukaryotic translation initiation factor 3 subunit H	Q3THW7	-0.25639	-0.166547	-0.13429	-0.185743	0.0365304	0.0182856
Eif3e	Eukaryotic translation initiation factor 3 subunit E	P60229	-0.18048	-0.142651	-0.274466	-0.199199	0.0391858	0.0182935
Polr2d	DNA-directed RNA polymerase II subunit RPB4	Q9D7M8	0.141003	0.121663	0.0683667	0.110344	0.0217187	0.0183128
Strap	Serine-threonine kinase receptor-associated protein	Q9Z1Z2	-0.305301	-0.148243	-0.270205	-0.241249	0.0475941	0.018393
Ints12	Integrator complex subunit 12	Q9D168	-0.268382	-0.143949	-0.29517	-0.235834	0.0465886	0.0184401
Phc1	Putative uncharacterized protein	Q3TJ47	0.597757		0.532177	0.564967	0.0327897	0.0184534
Hist1h1e	Histone H1.4	P43274	-0.529407	-0.50401	-0.260696	-0.431371	0.0856519	0.0186184
Akr1b1	Aldose reductase	P45376	-0.163122	-0.20007	-0.31208	-0.225091	0.0447835	0.0186894
Chchd7	Coiled-coil-helix-coiled-coil-helix domain-containing protein 7	Q3TFT3	0.559529		0.497272	0.528401	0.0311286	0.0187303
Snx18	Putative uncharacterized protein	Q3U1H7	0.274521	0.492111	0.572014	0.446215	0.0888921	0.0187348
Tpx2	Putative uncharacterized protein (Fragment)	Q9CT36	0.797049	0.42443	0.49558	0.572353	0.11421	0.0187938
Baiap2	Putative uncharacterized protein	Q3UKP6	0.472209	0.360266	0.228028	0.353501	0.0705701	0.0188093
Gsk3b	Glycogen synthase kinase-3 beta	E9QAQ5	0.273923	0.461601	0.25487	0.330131	0.0659643	0.0188413
Pard3	Partitioning defective 3 homolog	Q99NH2	-0.136839	-0.286035	-0.227924	-0.216933	0.0434182	0.0189008
Wars	Tryptophan--tRNA ligase, cytoplasmic	P32921	-0.096822	-0.120124	-0.186814	-0.134587	0.0269663	0.0189397
Mrpl24	39S ribosomal protein L24, mitochondrial	Q9CQ06	-0.254006	-0.175312	-0.126145	-0.185155	0.0372369	0.0190735
Ahcyl1	Putative adenosylhomocysteinase 2	Q80SW1	-0.196665	-0.345905	-0.197346	-0.246639	0.0496336	0.0190963
Hebp1	Heme-binding protein 1	Q9R257	0.209627	0.159045	0.314774	0.227815	0.0458657	0.0191121
Farp1	FERM, RhoGEF and pleckstrin domain-containing protein 1	F8VPU2	-0.072118	-0.0467594	-0.0370018	-0.0519597	0.0104653	0.0191271
Vps18	Putative uncharacterized protein	Q3UG80	0.266731	0.299197	0.495317	0.353748	0.0714021	0.0192046
Slc12a4	Putative uncharacterized protein	Q3TJG5	0.283617	0.502199	0.598952	0.461589	0.0932665	0.0192424
Mug1	Murinoglobulin-1	P28665	-13.0246		-11.5357	-12.2801	0.744469	0.0192736
Ccdc86	Coiled-coil domain-containing protein 86	Q9JJ89	-0.614937	-0.302635	-0.607785	-0.508453	0.102929	0.019311
Vars	Putative uncharacterized protein	Q3U3D3	-0.0924393	-0.0509362	-0.107606	-0.0836604	0.0169377	0.0193149
Hspa4	Heat shock 70 kDa protein 4	Q3U2G2	-0.102221	-0.105024	-0.182762	-0.130003	0.0263922	0.0194148
Fstl1	Follistatin-related protein 1	Q62356	0.750236	0.834293	0.396196	0.660242	0.134234	0.0194685
Synpo	Putative uncharacterized protein	Q3TA13	0.955563		1.08068	1.01812	0.0625572	0.0195336
Utp6	U3 small nucleolar RNA-associated protein 6 homolog	Q8VCY6	-0.31492	-0.151694	-0.300444	-0.255686	0.0521635	0.0195956
Ddx24	Putative uncharacterized protein	Q3TLR1	-0.386185	-0.235705	-0.498911	-0.3736	0.0762411	0.019606
Papss2	Bifunctional 3'-phosphoadenosine 5'-phosphosulfate synthase 2	O88428	1.26583	0.831367	0.635985	0.911062	0.186137	0.0196488
Tmem119	Transmembrane protein 119	Q8R138		0.4359	0.493445	0.464672	0.0287722	0.0196844
Golim4	Golgi integral membrane protein 4	D3YVW2	-0.419551	-0.214972	-0.451097	-0.361873	0.0740129	0.0196886
Arhgap19	Rho GTPase-activating protein 19	Q8BRH3	0.354939	0.470523	0.711059	0.512174	0.104891	0.0197373
Coprs	Coordinator of PRMT5 and differentiation stimulator	Q9CQ13	-0.0877841	-0.14612	-0.186778	-0.140227	0.0287285	0.0197509
Pwp1	Periodic tryptophan protein 1 homolog	Q99LL5	-0.343386	-0.223518	-0.172862	-0.246589	0.0505595	0.0197809
Rpl23a	60S ribosomal protein L23a	P62751	-0.149473	-0.135042	-0.25145	-0.178655	0.0366352	0.0197854
Akap1	A-kinase anchor protein 1, mitochondrial	O08715	-0.311652	-0.152916	-0.211476	-0.225348	0.0463452	0.0198945
Actl6a	Putative uncharacterized protein	Q3TF62	-0.162758	-0.28212	-0.154927	-0.199935	0.0411547	0.0199273
Wdr41	WD repeat-containing protein 41	Q3UDP0	-0.215934		-0.24493	-0.230432	0.0144979	0.0200005
Timeless	Putative uncharacterized protein	Q3U574	0.32684	0.161135	0.334748	0.274241	0.0565991	0.0200264
Rpl13a	60S ribosomal protein L13a	P19253	-0.346809	-0.165563	-0.248875	-0.253749	0.0523779	0.0200322
Tra2a	Transformer-2 protein homolog alpha	Q6PFR5	-0.152982	-0.0960421	-0.204251	-0.151092	0.0312514	0.0201092
Ubr4	E3 ubiquitin-protein ligase UBR4	A2AN08	-0.0610441	-0.0680248	-0.0317312	-0.0536	0.0111185	0.0202187
Isyna1	Inositol-3-phosphate synthase 1	Q9JHU9	-0.163454	-0.176472	-0.302885	-0.21427	0.0444666	0.0202352
Dnajb2	Putative uncharacterized protein	Q3TB24	0.644094	0.439958	0.918618	0.667557	0.138674	0.0202735
Srsf2	Serine/arginine-rich splicing factor 2	Q62093	-0.0656196	-0.0329401	-0.0698549	-0.0561382	0.0116633	0.0202783
Gdap2	Ganglioside-induced differentiation-associated protein 2	Q9DBL2	0.130177	0.208045	0.277927	0.205383	0.0426723	0.02028
Hexb	Beta-hexosaminidase subunit beta	P20060		-0.677639	-0.770034	-0.723836	0.0461977	0.0202881
Optn	Optineurin	Q8K3K8	-0.125751	-0.129286	-0.0617182	-0.105585	0.0219573	0.0203145
Snrnp40	Putative uncharacterized protein	Q3UFK4	0.293299	0.200838	0.141791	0.211976	0.0440897	0.0203212
Impa1	Inositol monophosphatase 1	O55023	0.128207	0.0626076	0.0858539	0.0922228	0.0192028	0.020363
Ccdc9	Coiled-coil domain-containing protein 9	Q8VC31	-0.307453	-0.142195	-0.240731	-0.230126	0.0479996	0.0204288
Acaca	Acetyl-CoA carboxylase 1	Q5SWU9	-0.102639	-0.0660036	-0.140562	-0.103068	0.0215242	0.0204758
Caap1	Putative uncharacterized protein	Q3TUU0		-0.19643	-0.223533	-0.209981	0.0135518	0.0205147
Mrps35	28S ribosomal protein S35, mitochondrial	Q8BJZ4	-0.268065	-0.141423	-0.158933	-0.189474	0.0396195	0.0205253
Rexo2	Putative uncharacterized protein	Q3T9B4	0.135618	0.234528	0.12616	0.165435	0.0346539	0.0205932
Spdl1	Protein Spindly	Q923A2	0.270038	0.147858	0.153133	0.190343	0.0398766	0.0205982
Abracl	Costars family protein ABRACL	Q4KML4	0.267264	0.234716		0.25099	0.016274	0.0206101
Tecpr1	Tectonin beta-propeller repeat-containing protein 1	Q80VP0		0.413236	0.470544	0.44189	0.0286539	0.0206116
Rpf1	Ribosome production factor 1	Q7TND5	-0.537803	-0.322995	-0.699256	-0.520018	0.108981	0.0206117
Vangl1	Vang-like protein 1	Q80Z96	0.540019	0.614949		0.577484	0.0374649	0.0206218
Sms	Spermine synthase	P97355	-0.318296	-0.155284	-0.328148	-0.267243	0.0560514	0.0206428
Rgs19	GAIP/RGS19	Q78NN4		0.437564	0.498463	0.468013	0.0304495	0.0206804
Rnh1	Putative uncharacterized protein	Q3UM23	0.175851	0.08051	0.140467	0.132276	0.0278255	0.0207575
Zadh2	Zinc binding alcohol dehydrogenase, domain containing 2	Q14AZ9	0.140513	0.303191	0.225725	0.223143	0.0469789	0.0207896
Dctn1	Dynactin subunit 1	O08788	0.0870181	0.0442982	0.0961731	0.0758298	0.0159858	0.0208412
Rsl1d1	PBK1	Q1PG84	-0.111648	-0.185972	-0.243184	-0.180268	0.0380783	0.0209193
Vps33b	Vacuolar protein sorting-associated protein 33B	P59016	0.283569	0.170288	0.146511	0.200122	0.042284	0.0209303
Psmc6	26S protease regulatory subunit 10B	P62334	-0.1033	-0.150196	-0.218067	-0.157188	0.0333142	0.0210509
Anxa8	Annexin A8	O35640	0.547471	0.264947	0.361309	0.391242	0.0829195	0.0210509
	UPF0562 protein C7orf55 homolog	Q9CR13	0.076551	0.0874496		0.0820003	0.0054493	0.0211221
Pou2f1	POU domain, class 2, transcription factor 1	P25425	-0.140307	-0.0858634	-0.187119	-0.137763	0.0292577	0.0211325
Hnrnpl	Heterogeneous nuclear ribonucleoprotein L (Fragment)	G5E924	0.0535358	0.117145	0.105643	0.0921078	0.0195697	0.0211491
Crabp1	Cellular retinoic acid-binding protein 1	P62965	0.493902	0.371497	0.225572	0.363657	0.0775592	0.0213005
Krr1	KRR1 small subunit processome component homolog	Q8BGA5	-0.195172	-0.261681	-0.119728	-0.192194	0.0410051	0.0213149
Mat2b	Methionine adenosyltransferase 2 subunit beta	Q99LB6	0.349976	0.671643	0.39353	0.471716	0.100751	0.0213581
Hspe1	Heat shock protein 1 (Chaperonin 10)	Q4KL76	-0.384039	-0.173919	-0.299092	-0.285684	0.0610258	0.0213637
Ddx11	Probable ATP-dependent RNA helicase DDX11	Q6AXC6	-0.198413	-0.398648	-0.436296	-0.344452	0.073824	0.0214968
Clcc1	Chloride channel CLIC-like protein 1	Q99LI2	0.3144	0.142752	0.288922	0.248691	0.0534777	0.0216311
Ccdc25	Coiled-coil domain-containing protein 25	Q78PG9	0.18316	0.11417	0.250133	0.182488	0.0392505	0.0216404
Endod1	Putative uncharacterized protein	Q3UQH3		0.557073	0.638575	0.597824	0.0407506	0.0216641
Ints4	Integrator complex subunit 4	Q8CIM8	0.33929	0.15723	0.2372	0.244574	0.0526852	0.0217027
Trabd	Putative uncharacterized protein	Q8CF50	-0.678599	-0.5668	-0.30257	-0.51599	0.111483	0.0218236
Nsun5	Putative methyltransferase NSUN5	Q8K4F6	-0.345325	-0.175617	-0.392156	-0.304366	0.0657787	0.021835
Tst	Thiosulfate sulfurtransferase	P52196	0.557831		0.64018	0.599005	0.0411744	0.0218456
Hmga1	MCG120563, isoform CRA_a	Q3TVP0	-0.164615	-0.103347	-0.22696	-0.164974	0.0356845	0.0218702
Ncapd2	Condensin complex subunit 1	Q8K2Z4	-0.0478006	-0.0841665	-0.10704	-0.0796691	0.0172483	0.0219071
Pnpla6	Neuropathy target esterase	Q3TRM4	0.505218	0.296431	0.661955	0.487868	0.105874	0.0220045
Cox6b1	Cytochrome c oxidase subunit 6B1	P56391	0.110461	0.0897497	0.180839	0.127016	0.0275674	0.0220093
Mpp6	Membrane protein, palmitoylated 6 (MAGUK p55 subfamily member 6), isoform CRA_b	Q3UN60	-0.273072	-0.402351	-0.58805	-0.421158	0.0914111	0.022011
Tinagl1	Lcn7 protein	Q4FJX7		0.0352666	0.0405366	0.0379016	0.00263502	0.0220942
Lmo7	MKIAA0858 protein (Fragment)	Q6ZQ32	0.215046	0.112094	0.252901	0.193347	0.0420705	0.0221142
Ctnnbip1	Beta-catenin-interacting protein 1	Q9JJN6	0.904444		0.785038	0.844741	0.0597032	0.0224596
Srf	Serum response factor	Q9JM73		0.344225	0.298752	0.321488	0.0227365	0.0224743
Orc6	Origin recognition complex subunit 6	Q66JV6	-0.373569	-0.662944	-0.34655	-0.461021	0.101262	0.0225063
Thop1	Thimet oligopeptidase	Q8C1A5	-0.114459	-0.052703	-0.077637	-0.0815995	0.0179371	0.022539
Nnt	Putative uncharacterized protein	Q3TWH2	0.204048	0.363966	0.464042	0.344019	0.0757134	0.0225901
Glod4	Glyoxalase domain-containing protein 4	Q9CPV4	0.063443	0.0858448	0.0382031	0.062497	0.0137611	0.0226098
Eif4g1	Putative uncharacterized protein (Fragment)	Q3UZD9	0.755172	0.654683		0.704928	0.0502444	0.0226495
Fnbp4	Formin-binding protein 4	Q6ZQ03	-0.386489	-0.541224	-0.242843	-0.390185	0.086155	0.0227282
Alcam	MuSC (Precursor)	Q54AJ5	-0.269082	-0.123393	-0.182162	-0.191546	0.0423176	0.0227516
Apip	Methylthioribulose-1-phosphate dehydratase	Q9WVQ5	0.285948	0.217232	0.454676	0.319285	0.0705419	0.0227535
Hnrpdl	Heterogeneous nuclear ribonucleoprotein D-like	Q9Z130	-0.204512	-0.453932	-0.440604	-0.366349	0.0810099	0.0227901
Exoc1	Putative uncharacterized protein	Q3U1G4	-0.264601	-0.337542	-0.147107	-0.24975	0.0554731	0.0229802
Eif4a1	Eukaryotic initiation factor 4A-I	P60843	-0.168705	-0.0905414	-0.208439	-0.155895	0.0346316	0.0229864
Ywhaz	14-3-3 protein zeta/delta	P63101	0.136229	0.213806	0.100708	0.150248	0.0333926	0.0230064
Wdtc1	WD and tetratricopeptide repeats protein 1	Q80ZK9	-0.472185	-0.546492	-0.237383	-0.418687	0.0931549	0.0230533
Npc2	Putative uncharacterized protein	Q3TXQ4	0.127807	0.263698	0.16034	0.183949	0.040966	0.0230939
Mrpl3	Mitochondrial ribosomal protein L3	Q91XB2	-0.659684	-0.598732	-0.288321	-0.515579	0.114983	0.0231546
Edf1	Endothelial differentiation-related factor 1	Q9JMG1	-0.204965	-0.105423	-0.11519	-0.14186	0.0316786	0.0232111
Ift122	Intraflagellar transport protein 122 homolog	Q6NWV3		0.271891	0.234872	0.253381	0.0185094	0.0232112
Ran	GTP-binding nuclear protein Ran	P62827	-0.16489	-0.0867826	-0.201237	-0.15097	0.0337652	0.0232781
Asun	Protein asunder homolog	Q8QZV7	-0.521863	-0.263562	-0.610816	-0.465414	0.104141	0.0232985
Txnrd1	Thioredoxin reductase 1, cytoplasmic	Q9JMH6	-0.357144	-0.153646	-0.290292	-0.267028	0.0598854	0.0233967
Mccc1	Methylcrotonoyl-CoA carboxylase subunit alpha, mitochondrial	Q99MR8	0.307914	0.201651	0.449251	0.319605	0.0717145	0.0234197
Arid1a	AT-rich interactive domain-containing protein 1A	A2BH40	-0.243387	-0.107377	-0.173567	-0.174777	0.0392672	0.0234752
Kdm5c	Lysine-specific demethylase 5C	P41230	-0.428343	-0.183717	-0.342348	-0.318136	0.0716475	0.0235803
Uprt	Uracil phosphoribosyltransferase homolog	B1AVZ0	-0.263138	-0.130217	-0.304312	-0.232556	0.0525318	0.0237126
Trim59	Tripartite motif-containing protein 59	Q922Y2	-0.0851977	-0.0990122		-0.092105	0.00690725	0.0238265
Klhdc4	Kelch domain-containing protein 4	G3UZ63	-0.363056	-0.154582	-0.290515	-0.269384	0.0611017	0.0238947
Prdx6	MKIAA0106 protein (Fragment)	Q6A0D0	-0.0412623	-0.0186886	-0.0426736	-0.0342082	0.00777047	0.0239598
Gnb2l1	Guanine nucleotide-binding protein subunit beta-2-like 1	P68040	-0.243889	-0.105461	-0.227667	-0.192339	0.0436908	0.0239604
Ddr2	Discoidin domain-containing receptor 2	Q62371	-0.330303	-0.264687	-0.140406	-0.245132	0.0556835	0.0239608
Rrbp1	Ribosome-binding protein 1	Q99PL5	0.0413806	0.0938851	0.0650424	0.0667694	0.0151813	0.0240024
Stmn1	Stathmin	P54227	0.507481	0.279397	0.259434	0.348771	0.079564	0.0241512
Arpc2	Putative uncharacterized protein (Fragment)	Q3UA52	-0.117472	-0.0501679	-0.0884943	-0.085378	0.0194914	0.0241843
Rps18	40S ribosomal protein S18	P62270	-0.30842	-0.130658	-0.2689	-0.235992	0.0538887	0.024195
Ruvbl1	RuvB-like 1	P60122	-0.266232	-0.153927	-0.129975	-0.183378	0.0419998	0.0243298
Naa15	N-alpha-acetyltransferase 15, NatA auxiliary subunit	G3X8Y3	-0.0977033	-0.131431	-0.211323	-0.146819	0.0336897	0.0244146
Ddx58	Ddx58 protein (Fragment)	Q05CC6	1.05438	0.451577	0.765913	0.757289	0.174067	0.024492
Nkrf	NF-kappa-B-repressing factor	Q8BY02	-0.481393	-0.252912	-0.254785	-0.329697	0.0758501	0.0245325
Osgepl1	Probable tRNA threonylcarbamoyladenosine biosynthesis protein Osgepl1	Q6PEB4	-0.720787		-0.617428	-0.669107	0.0516792	0.0245363
Clasrp	Suppressor-of-white-apricot-like protein 2	Q71RY3	0.196129	0.0907079	0.213577	0.166805	0.0383803	0.0245386
Pcca	Propionyl-Coenzyme A carboxylase, alpha polypeptide, isoform CRA_b	Q3UGC8	0.211846	0.35771	0.170504	0.246687	0.0567803	0.0245545
Cndp2	Cytosolic non-specific dipeptidase	Q9D1A2	0.110453	0.201939	0.102743	0.138378	0.0318584	0.0245654
Upf3b	Protein Upf3b	Q3ULL6	0.361602	0.152078	0.317916	0.277198	0.0638188	0.0245657
Ogt	UDP-N-acetylglucosamine--peptide N-acetylglucosaminyltransferase 110 kDa subunit	Q8CGY8	-0.167857	-0.109498	-0.248832	-0.175396	0.0403984	0.0245853
Bop1	Ribosome biogenesis protein BOP1	P97452	-0.477085	-0.199514	-0.389972	-0.355524	0.0819582	0.0246251
Dhx15	Putative pre-mRNA-splicing factor ATP-dependent RNA helicase DHX15	O35286	-0.43591	-0.188286	-0.423148	-0.349115	0.0804986	0.0246352
Qtrt1	Queuine tRNA-ribosyltransferase	Q9JMA2	-0.375931	-0.173923	-0.230642	-0.260165	0.0601542	0.0247614
Sucla2	Putative uncharacterized protein (Fragment)	Q3U6C7	-0.0924599	-0.219437	-0.200855	-0.170917	0.0395938	0.0248487
Dhdds	Dehydrodolichyl diphosphate synthase	Q99KU1	-0.450961	-0.478389	-0.202962	-0.377437	0.0875961	0.0249336
Gphn	Gephyrin	Q8BUV3	-0.159872	-0.351535	-0.220049	-0.243818	0.0565904	0.0249374
Cd82	CD82 antigen	P40237	0.46224	0.52575	0.219163	0.402385	0.0934271	0.024954
Gstm5	Glutathione S-transferase Mu 5	P48774	0.315058	0.340443	0.143495	0.266332	0.0618542	0.0249661
Ppp2r1a	Serine/threonine-protein phosphatase 2A 65 kDa regulatory subunit A alpha isoform	Q76MZ3	-0.146361	-0.0704017	-0.169508	-0.128757	0.0299328	0.0250122
Snx5	Putative uncharacterized protein	Q3TJN6	0.0467184	0.102031	0.111497	0.0867486	0.0202008	0.0250899
Aspm	Abnormal spindle-like microcephaly-associated protein homolog	Q8CJ27	-0.524631	-0.447578		-0.486105	0.0385263	0.0251751
Klc3	Kinesin light chain 3	Q91W40	1.4715	0.999354	0.636476	1.03578	0.241739	0.0251944
Stxbp2	Syntaxin binding protein 2, isoform CRA_e	Q548T0		0.214083	0.182607	0.198345	0.0157377	0.0252036
Cnp	2',3'-cyclic-nucleotide 3'-phosphodiesterase	P16330	-0.0466204	-0.0435193	-0.0863087	-0.0588161	0.0137754	0.0253589
Oat	Ornithine aminotransferase, mitochondrial	P29758	0.129813	0.232651	0.311593	0.224686	0.0526261	0.025361
Cyr61	Protein CYR61	P18406	0.765363	0.402436	0.395372	0.521057	0.12217	0.0254099
Calm1	Calmodulin	P62204	0.0890474	0.0730393	0.153807	0.105298	0.0246908	0.0254139
Dnajb6	DnaJ homolog subfamily B member 6	O54946	-0.110603	-0.120659	-0.221474	-0.150912	0.0354002	0.0254319
Utp20	Small subunit processome component 20 homolog	Q5XG71	-0.413893	-0.183365	-0.26525	-0.287503	0.0674712	0.025453
Efcab7	EF-hand calcium-binding domain-containing protein 7	Q8VDY4	0.222389	0.13522	0.318771	0.22546	0.053009	0.0255402
Polr1b	DNA-directed RNA polymerase I subunit RPA2	P70700	-0.433928	-0.712947	-0.325237	-0.490704	0.115466	0.025579
Lsm1	MCG14522	Q544C9	-0.304671	-0.35102	-0.143759	-0.266483	0.062804	0.0256533
Nol7	Nucleolar protein 7	Q9D7Z3		-0.364119	-0.428106	-0.396112	0.0319936	0.0256539
Eif5b	Eukaryotic translation initiation factor 5B	Q05D44	-0.0285674	-0.0585839	-0.0700185	-0.05239	0.0123602	0.0257035
Fermt2	Pleckstrin homology domain containing, family C (With FERM domain) member 1	Q3TLE2	0.263871	0.148384	0.127251	0.179835	0.0424583	0.0257376
Dgcr8	Microprocessor complex subunit DGCR8	Q9EQM6	-0.636376	-0.798725	-0.326016	-0.587039	0.138671	0.025763
D10Wsu52e	tRNA-splicing ligase RtcB homolog	Q3TJ01	-0.0949977	-0.039446	-0.0895324	-0.0746587	0.0176769	0.0258734
Capg	Putative uncharacterized protein	Q3TNN6	0.386397	0.310998	0.156948	0.284781	0.0675207	0.0259396
Ddx27	Probable ATP-dependent RNA helicase DDX27	Q921N6	-0.66928	-0.346754	-0.345905	-0.45398	0.10765	0.0259455
Dzip1l	Zinc finger protein DZIP1L	Q499E4	0.352318	0.146544	0.25254	0.250467	0.0594106	0.0259603
Caprin1	Caprin-1	Q60865	-0.0996204	-0.0727969	-0.162158	-0.111525	0.026474	0.0259972
Kif23	Kinesin family member 23	Q80V30	-0.407207	-0.423931	-0.176458	-0.335865	0.0798498	0.0260704
Myo1d	Unconventional myosin-Id	Q5SYD0	0.617204	0.33675	0.302769	0.418908	0.0996323	0.0260896
Mri1	Methylthioribose-1-phosphate isomerase	Q9CQT1	-0.203135	-0.184023	-0.0826501	-0.156603	0.0373857	0.0262703
Yipf5	Protein YIPF5	Q9EQQ2	0.252555		0.298161	0.275358	0.0228031	0.0263
Noc2l	Nucleolar complex protein 2 homolog	Q9WV70	-0.457722	-0.696599	-0.298463	-0.484261	0.115695	0.0263072
Zfp219	Zfp219 protein	Q4VA98	1.05442		0.893068	0.973744	0.0806758	0.0263123
Fuk	L-fucose kinase	Q7TMC8	0.238814	0.529699	0.317763	0.362092	0.0868471	0.0264978
Rps26	40S ribosomal protein S26	P62855	-0.197075	-0.082177	-0.194754	-0.158002	0.0379184	0.0265261
Itga11	Integrin alpha-11	P61622	1.38842	1.64179		1.51511	0.126689	0.0265545
Shcbp1	SHC SH2 domain-binding protein 1	Q9Z179	0.159447	0.065914	0.111246	0.112202	0.0270048	0.0266675
Fbxo6	F-box only protein 6	Q9QZN4	-0.212889	-0.0866179	-0.200725	-0.166744	0.0402166	0.0267712
Apc	Adenomatosis polyposis coli	B2RUG9	-0.157691	-0.27045	-0.384363	-0.270835	0.065435	0.0268566
Stard5	StAR-related lipid transfer protein 5	Q9EPQ7	0.569911	0.581651	0.239554	0.463705	0.112127	0.0268978
Cpsf4	Cleavage and polyadenylation specific factor 4 isoform 1	B2LVG5	0.219046	0.184828		0.201937	0.0171093	0.0269049
Kiaa0100	UPF0378 protein KIAA0100	Q5SYL3	0.591232		0.498826	0.545029	0.0462028	0.0269192
Kntc1	Kinetochore-associated protein 1	Q8C3Y4	0.0886641	0.201076	0.221026	0.170255	0.0412001	0.0269354
Mtap	S-methyl-5'-thioadenosine phosphorylase	Q9CQ65	-0.171156	-0.253047	-0.105337	-0.176514	0.0427243	0.0269468
Pex6	Peroxisome assembly factor 2	Q99LC9	0.438119	0.36945		0.403784	0.0343342	0.0270013
Peak1	Pseudopodium-enriched atypical kinase 1	Q69Z38	0.0788974	0.07245	0.148167	0.0998382	0.0242361	0.0270922
Fam114a1	Protein Noxp20	Q9D281	1.09446	0.442595	0.784413	0.773823	0.188253	0.0271995
Klhl42	Kelch-like protein 42	Q8BFQ9		-0.40665	-0.482916	-0.444783	0.0381331	0.0272235
Nit2	Omega-amidase NIT2	Q9JHW2	-0.540635	-0.213068	-0.433452	-0.395719	0.0964241	0.0272803
Mrto4	mRNA turnover protein 4 homolog	Q9D0I8	-0.378427	-0.190335	-0.19427	-0.254344	0.062052	0.0273421
Mecp2	Methyl-CpG-binding protein 2	D3Z7U4	1.15891	0.766532	0.482611	0.802685	0.196067	0.0274029
Stk4	Serine/threonine-protein kinase 4	Q9JI11		0.149143	0.177318	0.163231	0.0140875	0.0274035
Syne2	Nesprin-2	Q6ZWQ0	0.178794	0.115237	0.0754623	0.123164	0.0300914	0.0274144
Ggact	Gamma-glutamylaminecyclotransferase	Q923B0	0.257667	0.333164	0.130713	0.240515	0.0590683	0.0276773
Ptcd1	Putative uncharacterized protein	Q3UCI6	-0.971716	-0.493734	-0.489318	-0.651589	0.160068	0.0276912
Rps15a	40S ribosomal protein S15a	P62245	-0.209205	-0.0901314	-0.228916	-0.176084	0.0433515	0.0278029
Kdm1b	Lysine-specific histone demethylase 1B	Q8CIG3	-0.472201		-0.562918	-0.517559	0.0453581	0.0278251
Mvp	Major vault protein	Q9EQK5	0.0301165	0.0708408	0.076565	0.0591741	0.0146225	0.0279922
Stambp	Putative uncharacterized protein	Q3TGB1	0.351095	0.817667	0.497564	0.555442	0.137761	0.028182
Sdf2l1	Stromal cell-derived factor 2-like protein 1	Q9ESP1	0.472454		0.395394	0.433924	0.0385299	0.0281901
Golga7	Golgin subfamily A member 7	Q91W53	-0.492079	-0.357372	-0.193625	-0.347692	0.0862921	0.0282163
Nmd3	60S ribosomal export protein NMD3	Q99L48	-0.162644	-0.129782	-0.2875	-0.193309	0.0480416	0.0282865
Smyd2	N-lysine methyltransferase SMYD2	Q8R5A0	0.271851	0.228206	0.494477	0.331511	0.082451	0.0283262
Ddah1	N(G),N(G)-dimethylarginine dimethylaminohydrolase 1	Q9CWS0	-0.0939226	-0.0375404	-0.0925821	-0.0746817	0.0185747	0.0283274
Hells	Lymphocyte-specific helicase	Q60848	-0.185882	-0.466067	-0.323314	-0.325088	0.0808872	0.0283479
Cog5	Conserved oligomeric Golgi complex subunit 5	Q8C0L8	0.515074	0.568047	1.07718	0.720098	0.179192	0.0283536
Mrps7	28S ribosomal protein S7, mitochondrial	Q80X85	-0.256105	-0.111958	-0.150851	-0.172971	0.0430567	0.0283703
Topbp1	DNA topoisomerase 2-binding protein 1	Q6ZQF0	0.131048	0.052687	0.0890656	0.0909335	0.0226401	0.0283809
Pafah1b2	Platelet-activating factor acetylhydrolase IB subunit beta	Q61206	0.216538	0.32986	0.134803	0.227067	0.0565536	0.028399
Aldh6a1	Aldh6a1 protein	Q8K0L1	0.664116	0.541516	0.254628	0.486753	0.121339	0.0284452
Rars	Arginine--tRNA ligase, cytoplasmic	Q9D0I9	-0.0838759	-0.0691291	-0.0321204	-0.0617085	0.0153944	0.0284843
Rrm1	Ribonucleoside-diphosphate reductase large subunit	P07742	-0.188314	-0.102783	-0.0870418	-0.126046	0.0314639	0.0285162
Bid	BH3-interacting domain death agonist	P70444	0.277823	0.275451	0.110736	0.221337	0.0553043	0.0285673
Hectd3	E3 ubiquitin-protein ligase HECTD3	Q3U487	0.175722		0.146701	0.161211	0.0145109	0.0285746
Ino80c	INO80 complex subunit C	Q8BHA0	-0.619029	-0.827854	-0.319878	-0.58892	0.147411	0.0286598
Desi2	Putative uncharacterized protein	Q3UJE4	-0.345493	-0.414133		-0.379813	0.0343201	0.0286847
Ints7	Integrator complex subunit 7	Q7TQK1	0.115191	0.297698	0.275459	0.229449	0.0574887	0.028711
Pdlim5	PDZ and LIM domain protein 5	Q8CI51	0.288163	0.215249	0.111241	0.204884	0.051335	0.0287121
Zfp106	Protein Zfp106	E9Q7S1	-0.0974916		-0.116894	-0.107193	0.00970107	0.0287292
Pmvk	Putative uncharacterized protein	Q3THA3	0.075808	0.0631894		0.0694987	0.00630931	0.0288182
Thoc1	THO complex subunit 1	Q8R3N6	-0.179639	-0.0684643	-0.15629	-0.134798	0.0338446	0.0288215
Nudt1	7,8-dihydro-8-oxoguanine triphosphatase	P53368		0.352989	0.423581	0.388285	0.035296	0.0288558
Ppp2r5a	Putative uncharacterized protein (Fragment)	Q3ULN8	-0.0619814	-0.144718	-0.162385	-0.123028	0.0309464	0.0289187
Ddx51	ATP-dependent RNA helicase DDX51	Q6P9R1	-0.418561	-0.167336	-0.280324	-0.288741	0.0726444	0.0289294
Rpl28	60S ribosomal protein L28	P41105	-0.177749	-0.404739	-0.232523	-0.271671	0.0683873	0.0289585
Gtf2a1	Gtf2a1 protein	Q0VGZ0	-0.252839	-0.114509	-0.139094	-0.168814	0.0426078	0.0290989
Rrp7a	Putative uncharacterized protein	Q3U5H9	-0.332861	-0.150671	-0.183204	-0.222246	0.0560994	0.0291043
Cul3	MKIAA0617 protein (Fragment)	Q6ZQ84	-0.269067	-0.103205	-0.250372	-0.207548	0.05245	0.0291659
Aldh9a1	Putative uncharacterized protein	Q3TG52	0.0639842	0.170156	0.134351	0.12283	0.0311857	0.0294153
Kiaa1671	Uncharacterized protein KIAA1671	Q8BRV5	0.359557	0.283085	0.135214	0.259285	0.0658465	0.0294282
Pfkl	6-phosphofructokinase, liver type	P12382	0.109792	0.21382	0.101833	0.141815	0.0360756	0.0295197
Rpl5	60S ribosomal protein L5	P47962	-0.16972	-0.0642894	-0.157796	-0.130602	0.0333344	0.0297003
Cul5	Cullin 5	Q2M4H5	-0.260501	-0.132602	-0.124389	-0.172497	0.0440657	0.0297472
Rnf25	Putative uncharacterized protein (Fragment)	Q9CT51	0.28291	0.135316	0.143666	0.187297	0.0478669	0.0297702
Lama5	Laminin subunit alpha-5	Q61001	-0.137666	-0.200554	-0.331589	-0.22327	0.0571214	0.0298284
Prmt3	Putative uncharacterized protein (Fragment)	Q3U2K1	-0.176268	-0.204898	-0.385572	-0.255579	0.0655196	0.0299386
Med11	Mediator of RNA polymerase II transcription subunit 11	Q9D8C6	0.447724		0.370155	0.408939	0.0387846	0.0300991
Wdfy1	MKIAA1435 protein (Fragment)	Q5DTX9	-0.611783	-0.505546		-0.558664	0.0531186	0.0301746
Myl6b	Myosin light chain 6B	Q8CI43	0.151388	0.408481	0.362874	0.307581	0.0791982	0.0301797
Rpl7l1	Putative uncharacterized protein (Fragment)	Q3U8B9	-0.167952	-0.396484	-0.454522	-0.339653	0.0874696	0.0301881
Fn1	Putative uncharacterized protein	Q3UGY5	-0.241641	-0.387676	-0.606847	-0.412054	0.106128	0.030195
Ube2z	Ubiquitin-conjugating enzyme E2 Z	Q3UE37	-0.207648	-0.0893559	-0.117737	-0.138247	0.0356545	0.0302687
Evi5l	Putative uncharacterized protein	Q3U1G0	1.64455	1.55333	0.617323	1.27173	0.328264	0.0303155
Trip13	Pachytene checkpoint protein 2 homolog	Q3UA06	-0.083805	-0.222702	-0.215098	-0.173869	0.0450853	0.0305691
Ivd	Isovaleryl-CoA dehydrogenase, mitochondrial	Q9JHI5	0.151223	0.0815543	0.216115	0.149631	0.0388526	0.0306442
Nomo1	Nodal modulator 1	Q6GQT9	-0.187218	-0.0702125	-0.180401	-0.145944	0.0379167	0.0306759
Pfn1	Profilin-1	P62962	-0.150832	-0.0764542	-0.206102	-0.144463	0.0375613	0.0307195
Zw10	Centromere/kinetochore protein zw10 homolog	O54692	0.040652	0.112007	0.0939322	0.0821972	0.0214179	0.0308402
Anxa6	Annexin A6	P14824	0.605572	0.437223	0.224896	0.422564	0.110136	0.0308552
Npepl1	Putative uncharacterized protein	Q3TCV9	-0.29521	-0.242833		-0.269022	0.0261885	0.0308892
Agpat6	Putative uncharacterized protein (Fragment)	Q3TSI4	-0.36515	-0.19086	-0.165266	-0.240426	0.0627983	0.0309757
Zwilch	Protein zwilch homolog	Q8R060	0.339253	0.273523	0.624608	0.412461	0.107757	0.030988
Pak4	Serine/threonine-protein kinase PAK 4	Q8BTW9	1.78029	0.935627	0.801436	1.17245	0.306378	0.031001
Sec22b	Vesicle-trafficking protein SEC22b	O08547	0.100695	0.0635212	0.0396484	0.0679549	0.0177615	0.0310136
Acsl5	Acyl-CoA synthetase long-chain family member 5, isoform CRA_b	Q3UC67	-0.529981	-0.287414	-0.2319	-0.349765	0.0915219	0.0310772
Plaa	Phospholipase A-2-activating protein	P27612	-0.0793389	-0.0850178	-0.1695	-0.111286	0.0291535	0.0311425
Crot	Peroxisomal carnitine O-octanoyltransferase	Q9DC50	0.871783	0.37285	0.484872	0.576502	0.151141	0.0311855
Pwp2	MCG115350	Q2M1K2	-0.493122	-0.473572	-0.182321	-0.383005	0.100501	0.0312356
Ddb1	DNA damage-binding protein 1	Q3U1J4	-0.352098	-0.1265	-0.288489	-0.255696	0.0671568	0.0312881
Hspg2	Basement membrane-specific heparan sulfate proteoglycan core protein	B1B0C7	-0.289046	-0.128409	-0.153022	-0.190159	0.0499513	0.0312964
Bcl10	B-cell lymphoma/leukemia 10	Q9Z0H7	-0.233619		-0.191665	-0.212642	0.0209772	0.0313001
Rpl31	60S ribosomal protein L31	P62900	-0.357643	-0.163149	-0.183257	-0.234683	0.0617533	0.0313946
Eif4g2	Eukaryotic translation initiation factor 4 gamma 2	Q62448	-0.114568	-0.124473	-0.247275	-0.162105	0.0426807	0.0314281
Med20	Mediator of RNA polymerase II transcription subunit 20	Q9R0X0	-0.430859	-0.154255	-0.354811	-0.313308	0.0825013	0.0314353
Iqce	IQ domain-containing protein E	Q6PCQ0	0.0315701	0.084643	0.084184	0.066799	0.017615	0.0315172
Grn	Granulins	P28798	0.252784	0.34525	0.125509	0.241181	0.0636987	0.0316064
Tyw1	tRNA wybutosine-synthesizing protein 1 homolog	Q8BJM7	-0.151724	-0.069433	-0.194091	-0.138416	0.0365957	0.0316667
Slc12a7	Solute carrier family 12 member 7	Q9WVL3	0.305413	0.121435	0.185179	0.204009	0.0539378	0.0316667
Trip6	Putative uncharacterized protein	Q3TMB5	0.221346	0.155687	0.0814501	0.152827	0.0404096	0.031672
Dnajc13	MCG115602	G3X922	0.0554097	0.122801	0.0630863	0.0804324	0.0213	0.03176
Thbs1	Thrombospondin-1	P35441	-0.13122	-0.365722	-0.277636	-0.258193	0.0683895	0.0317729
Usp24	Ubiquitin carboxyl-terminal hydrolase 24	B1AY13	-0.113842	-0.197732	-0.300869	-0.204148	0.0540853	0.0317847
Sars	Serine--tRNA ligase, cytoplasmic	P26638	-0.0295621	-0.0656501	-0.0830308	-0.0594143	0.0157468	0.031807
Ecsit	Evolutionarily conserved signaling intermediate in Toll pathway, mitochondrial	Q9QZH6	-0.230046	-0.367101	-0.142472	-0.24654	0.0653672	0.0318297
Gltscr2	MCG2065, isoform CRA_c	Q8BK35	-0.26132	-0.407438	-0.664791	-0.444516	0.117938	0.0318687
Gemin4	Putative uncharacterized protein	Q3URX8	-0.220091	-0.40288	-0.171916	-0.264963	0.0703473	0.0319081
Dgkz	Diacylglycerol kinase zeta	Q80UP3	0.5614	0.4586		0.51	0.0513999	0.0319726
Coq3	Putative uncharacterized protein	Q3UQM8	0.693005	0.383754	0.291903	0.456221	0.121325	0.0320031
Clta	Clathrin light chain A	Q6PFA2	-0.0250196	-0.0284769	-0.0556303	-0.0363756	0.00967894	0.0320355
Zfp36l2	Zinc finger protein 36, C3H1 type-like 2	P23949	-0.207476	-0.525863	-0.316592	-0.349977	0.093414	0.0322171
Blm	Bloom syndrome protein homolog	O88700	0.365554	0.161249	0.45827	0.328358	0.0877366	0.032279
Rpl18a	60S ribosomal protein L18a	P62717	-0.342933	-0.120498	-0.273194	-0.245542	0.0656831	0.0323456
Mms19	MMS19 nucleotide excision repair protein homolog	Q9D071	0.405882	0.22499	0.607305	0.412726	0.110418	0.0323523
Kdm3b	Jumonji domain containing 1B	B9EKS2		-0.110089	-0.0896901	-0.0998897	0.0101996	0.0323899
Eif3g	Eukaryotic translation initiation factor 3 subunit G	Q3THA0	-0.13655	-0.0531388	-0.0831667	-0.0909518	0.0243913	0.0324937
Osbpl8	Oxysterol-binding protein	B9EJ86	0.301002	0.317797	0.113311	0.244036	0.0655425	0.032581
Srpk1	SRSF protein kinase 1	O70551	-0.13391	-0.259419	-0.114234	-0.169188	0.0454718	0.0326225
Gga3	ADP-ribosylation factor-binding protein GGA3	Q8BMI3	-0.261579	-0.554716	-0.740895	-0.519064	0.13951	0.0326241
Crtap	Cartilage-associated protein	Q9CYD3	0.152915	0.284212	0.120571	0.185899	0.0500352	0.0327074
Wipi2	WD repeat domain phosphoinositide-interacting protein 2	Q80W47	2.22982		2.74511	2.48746	0.257644	0.0328525
Krt17	Keratin, type I cytoskeletal 17	Q9QWL7	-7.2486	-5.5551	-2.53022	-5.11131	1.38004	0.0328931
Ralgapa2	Ral GTPase-activating protein subunit alpha-2	A3KGS3		0.278067	0.225692	0.251879	0.0261874	0.0329756
Col5a2	Collagen alpha-2(V) chain	Q3U962	-0.126097	-0.149766	-0.0517102	-0.109191	0.0295415	0.0330147
Gas8	Growth arrest specific 8	Q49MD7	-0.623695	-0.2732	-0.789749	-0.562215	0.15225	0.0330711
Ptgr1	Prostaglandin reductase 1	Q91YR9	0.445543	0.173316	0.266035	0.294964	0.0799054	0.0330918
Ccbl2	Kynurenine--oxoglutarate transaminase 3	Q71RI9	0.340178		0.275675	0.307927	0.0322518	0.0332182
Pak1ip1	Putative uncharacterized protein (Fragment)	Q3UX26	-0.302542	-0.79227	-0.87202	-0.655611	0.178029	0.0332351
Snrpg	Small nuclear ribonucleoprotein G	P62309	-0.137331	-0.111261		-0.124296	0.0130354	0.0332609
Parva	Putative uncharacterized protein	Q8C5R4	0.0359513	0.0263868	0.0646738	0.0423373	0.0115045	0.0332763
Dak	Putative uncharacterized protein	Q3UTZ4	0.505186	0.272736	0.210652	0.329525	0.0896406	0.0333418
Diap3	Diaphanous homolog 3 (Drosophila)	Q0VGT1	0.0523147	0.149334	0.108208	0.103285	0.0281149	0.0333806
Hmg20a	High mobility group protein 20A	Q9DC33		0.383321	0.473583	0.428452	0.0451309	0.0334059
Rnf114	Putative uncharacterized protein (Fragment)	Q3UC35	-0.714525	-0.264608	-0.758392	-0.579175	0.157792	0.0334332
Cct3	T-complex protein 1 subunit gamma	P80318	-0.258585	-0.0883609	-0.22106	-0.189335	0.0516361	0.0334952
Myo5a	Unconventional myosin-Va	Q99104	0.324915	0.166082	0.468789	0.319929	0.0874196	0.0336112
Abcf2	Putative uncharacterized protein	Q3UVI9	-0.179522	-0.0644449	-0.120563	-0.12151	0.0332233	0.0336498
Msh2	DNA mismatch repair protein Msh2	P43247	0.249426	0.107428	0.128259	0.161705	0.0442712	0.0337291
Pbdc1	Protein PBDC1	Q9D0B6	-0.202875	-0.109234	-0.0840092	-0.132039	0.0361586	0.0337444
Ftsjd2	Cap-specific mRNA (nucleoside-2'-O-)-methyltransferase 1	Q9DBC3	-0.3971	-0.171712	-0.202798	-0.257203	0.0705215	0.0338197
Trappc12	Putative uncharacterized protein	Q3UGE1	0.461433	0.168671	0.295747	0.308617	0.0847577	0.03392
Rbm22	Pre-mRNA-splicing factor RBM22	Q8BHS3	0.0906199	0.169062	0.253355	0.171012	0.0469878	0.0339479
Mut	Methylmalonyl-CoA mutase, mitochondrial	P16332	0.323278	0.592041	0.241264	0.385528	0.105936	0.0339523
Sec14l1	Protein Sec14l1	Q99J07	-0.56601	-0.495612	-1.13051	-0.73071	0.200929	0.0339959
Crocc	Rootletin	Q8CJ40		0.153641	0.190564	0.172103	0.0184613	0.0340147
Copb1	Coatomer subunit beta	Q9JIF7	0.187241	0.134047	0.0648895	0.128726	0.0354199	0.0340358
Mtnd3	NADH-ubiquinone oxidoreductase chain 3	P03899	0.335456		0.270408	0.302932	0.0325239	0.0340445
Esyt1	Extended synaptotagmin-1	Q3U7R1	0.136481	0.368415	0.228743	0.244546	0.0674181	0.0341537
Fus	RNA-binding protein FUS	P56959	-0.140075	-0.251966	-0.100685	-0.164242	0.0453118	0.0341978
Acadm	Medium-chain specific acyl-CoA dehydrogenase, mitochondrial	P45952	0.0562784	0.159483	0.161577	0.125779	0.0347558	0.0342958
Psmb1	Proteasome subunit beta type-1	O09061	-0.2208	-0.151806	-0.0772811	-0.149963	0.0414407	0.0342995
Sugp1	SURP and G-patch domain-containing protein 1	Q8CH02	-0.15181	-0.107929	-0.0524054	-0.104048	0.0287611	0.0343176
Parn	Putative uncharacterized protein	Q3TUQ8	0.255167	0.520446	0.230516	0.335377	0.0928081	0.0343863
Cdk14	Cyclin-dependent kinase 14	O35495	-0.235115	-0.102427	-0.304202	-0.213915	0.0592039	0.0343943
Acsl4	Putative uncharacterized protein	Q8BW44	-0.437679	-0.157811	-0.461765	-0.352418	0.0975516	0.0344037
Trim3	Tripartite motif-containing protein 3	Q3TDT0	0.230644	0.086467	0.256857	0.191323	0.0529712	0.0344176
Xpo1	Exportin-1	Q6P5F9	-0.15774	-0.360411	-0.178119	-0.23209	0.0644298	0.0345828
Pspc1	Paraspeckle component 1	Q8R326	-0.212481	-0.0978656	-0.288561	-0.199636	0.0554224	0.0345852
Trio	Triple functional domain protein	Q0KL02	-0.0821974	-0.0276372	-0.0749816	-0.0616054	0.0171114	0.0346165
Ltbp1	Latent-transforming growth factor beta-binding protein 1	Q8CG19	-0.233082	-0.139815	-0.087301	-0.153399	0.0426281	0.0346462
Ogg1	N-glycosylase/DNA lyase	O08760	0.146291	0.182261		0.164276	0.0179851	0.0347107
Gigyf2	PERQ amino acid-rich with GYF domain-containing protein 2	Q6Y7W8	0.0521497	0.0418255		0.0469876	0.0051621	0.0348301
Mif4gd	MIF4G domain-containing protein	Q3UBZ5	0.390569	0.15647	0.212311	0.253117	0.0705916	0.0348704
Kif4	Chromosome-associated kinesin KIF4	P33174	-0.105397	-0.0366704	-0.0711571	-0.0710747	0.0198396	0.0349261
Ecd	Putative uncharacterized protein	Q8BXV4	-0.39131	-0.171899	-0.515055	-0.359421	0.100336	0.0349308
Mrpl49	39S ribosomal protein L49, mitochondrial	Q9CQ40	-0.320175	-0.628079	-0.263465	-0.403906	0.113275	0.0352212
Ints1	Integrator complex subunit 1	Q6P4S8	-0.174295	-0.0775807	-0.0832336	-0.111703	0.0313384	0.0352441
Rab32	RAB32, member RAS oncogene family	Q0PD23	-0.651626	-0.386254	-0.242518	-0.426799	0.119827	0.0352904
Rad23b	UV excision repair protein RAD23 homolog B	P54728	-0.0941834	-0.208123	-0.282714	-0.195007	0.0548177	0.0353693
Clptm1l	Cleft lip and palate transmembrane protein 1-like protein	Q8BXA5	-0.150426	-0.314676	-0.139249	-0.20145	0.0567045	0.035454
Nfic	Nuclear factor 1 C-type	P70255	-0.120469	-0.0583031	-0.172283	-0.117018	0.0329484	0.0354729
Hdac1	Histone deacetylase 1	O09106	0.230329	0.209985	0.0758456	0.172053	0.0484611	0.0354949
Dhx33	Putative ATP-dependent RNA helicase DHX33	Q80VY9	-0.333429	-0.233903	-0.112569	-0.226634	0.0638603	0.0355208
Mis12	Protein MIS12 homolog	Q9CY25	0.255618	0.320283		0.287951	0.0323325	0.0355923
Atpif1	ATPase inhibitor, mitochondrial	O35143	0.250786		0.31423	0.282508	0.0317222	0.0355932
Mrpl48	39S ribosomal protein L48, mitochondrial	Q8JZS9	-0.0394566		-0.0314856	-0.0354711	0.00398552	0.0356158
Fbxo42	Putative uncharacterized protein (Fragment)	Q3TBJ0	-0.282627		-0.354256	-0.318441	0.0358147	0.0356501
Ska1	Spindle and kinetochore-associated protein 1	Q9CPV1	0.126217	0.351148	0.216822	0.231396	0.0653398	0.0356552
Dis3	Exosome complex exonuclease RRP44	Q9CSH3	-0.0721838	-0.20973	-0.215631	-0.165849	0.0468633	0.0356993
Cltb	Putative uncharacterized protein	Q3TJ95	0.0648236	0.184041	0.196415	0.148427	0.0419538	0.0357196
Znf512b	MCG140111, isoform CRA_c (Fragment)	Q6PHP4	0.540677	0.826807	0.286871	0.551451	0.155959	0.0357555
Atp5a1	ATP synthase subunit alpha, mitochondrial	Q03265	-0.130207	-0.0505951	-0.071623	-0.0841417	0.0238192	0.0358164
Etnk1	Putative uncharacterized protein (Fragment)	Q8BWV4	-0.865101	-1.67533	-0.685263	-1.07523	0.304508	0.0358431
Eef2k	Eukaryotic elongation factor 2 kinase	O08796	0.343078		0.2733	0.308189	0.0348892	0.0358822
Alyref	THO complex subunit 4	O08583	-0.23091	-0.619297	-0.358833	-0.403013	0.114273	0.0359211
Syap1	Synapse-associated protein 1	Q9D5V6	0.284003	0.13207	0.127177	0.181083	0.0514794	0.0360888
Akr1a1	Putative uncharacterized protein	Q3UJW9	0.0208535	0.0329277	0.0115295	0.0217702	0.00619411	0.0361425
Eif3i	Eukaryotic translation initiation factor 3 subunit I	Q9QZD9	-0.19836	-0.115168	-0.323156	-0.212228	0.0604401	0.036203
Xrcc4	DNA repair protein XRCC4	Q924T3	-0.0974826	-0.196165	-0.0821976	-0.125282	0.0357152	0.0362691
Rbm17	Splicing factor 45	Q8JZX4	-0.0699043	-0.209724	-0.144235	-0.141288	0.0403894	0.0364482
Rrp1	Ribosomal RNA processing protein 1 homolog A	P56183	-0.134688	-0.42061	-0.373803	-0.3097	0.0885433	0.036456
Rpl10a	Ribosomal protein	Q3U561	-0.303489	-0.101716	-0.307643	-0.237616	0.0679606	0.0364811
Myo7a	Unconventional myosin-VIIa	P97479	0.924651	0.437722	0.402255	0.588209	0.168532	0.0365967
Dock11	Dedicator of cytokinesis protein 11	A2AF47	0.124623	0.237821	0.094386	0.152277	0.0436535	0.0366321
Klc4	Kinesin light chain 4	Q9DBS5	0.728569	0.577561		0.653065	0.0755037	0.0366386
Mrps21	28S ribosomal protein S21, mitochondrial	P58059	2.75575		3.47988	3.11782	0.362062	0.0367995
Ubr5	E3 ubiquitin-protein ligase UBR5	Q80TP3	-0.086825	-0.26527	-0.185857	-0.179317	0.0516162	0.0369008
Pdcd11	Protein RRP5 homolog	Q6NS46	-0.442544	-0.19802	-0.201936	-0.280833	0.0808634	0.0369218
Mrpl1	39S ribosomal protein L1, mitochondrial	Q99N96	-0.271716	-0.0855361	-0.229126	-0.195459	0.05632	0.0369678
Ugp2	Putative uncharacterized protein	Q3U548	0.193286	0.215037	0.451098	0.286474	0.0825511	0.0369726
Mrps9	28S ribosomal protein S9, mitochondrial	Q9D7N3	-0.248462	-0.104288	-0.121086	-0.157945	0.0455173	0.0369775
Parp3	Putative uncharacterized protein	Q3UGL7	0.32387	0.155207	0.137927	0.205668	0.0593112	0.0370231
Kbp	KIF1-binding protein	Q6ZPU9	0.258803	0.113125	0.120568	0.164166	0.0473677	0.0370581
Trappc4	Trafficking protein particle complex 4, isoform CRA_a	Q544R8	0.0569343	0.179858	0.163618	0.13347	0.038554	0.037132
D17Wsu104e	UPF0556 protein C19orf10 homolog	Q9CPT4	0.296324	0.143811	0.124257	0.188131	0.0543905	0.0371897
Tmsb4x	Thymosin, beta 4, X chromosome	Q6ZWX2	0.983917	0.522236	0.381485	0.629213	0.181947	0.0372025
Tsen15	tRNA-splicing endonuclease subunit Sen15	Q8R3W5	1.02549	0.730627	0.330577	0.695565	0.201369	0.03728
Adnp	Putative uncharacterized protein	Q3UYC8	-0.181424	-0.069783	-0.0969808	-0.116062	0.0336104	0.0372996
Coq9	Ubiquinone biosynthesis protein COQ9, mitochondrial	Q8K1Z0		0.249125	0.196646	0.222886	0.0262394	0.0373017
Morc2a	MORC family CW-type zinc finger protein 2A	Q69ZX6	-0.309908	-0.583863	-0.225539	-0.373103	0.108158	0.0373678
Dopey2	Protein dopey-2	Q3UHQ6	0.613627		0.483899	0.548763	0.0648639	0.0374506
Atp2a2	Sarcoplasmic/endoplasmic reticulum calcium ATPase 2	O55143	-0.706066	-0.254727	-0.407841	-0.456211	0.132516	0.0375019
Daglb	Sn1-specific diacylglycerol lipase beta	Q91WC9	-0.388727	-0.121605	-0.352841	-0.287725	0.0837032	0.037604
Cs	Citrate synthase, mitochondrial	Q9CZU6	-0.267943	-0.166606	-0.0917941	-0.175448	0.0510415	0.0376057
Pcf11	MKIAA0824 protein (Fragment)	Q69ZY3	-0.218443	-0.317551	-0.582048	-0.372681	0.108523	0.0376686
Nol8	Nucleolar protein 8	E9QKD1	-0.287299	-0.644159	-0.289496	-0.406985	0.118589	0.0377121
Ldha	L-lactate dehydrogenase	Q3THB4	0.0622236	0.113261	0.0422224	0.0725691	0.0211495	0.0377249
Dbn1	Putative uncharacterized protein	Q3TRK3	0.546376	0.279894	0.215582	0.347284	0.101263	0.0377583
Cluh	Clustered mitochondria protein homolog	Q5SW19	-0.241895	-0.626861	-0.329517	-0.399424	0.116497	0.0377765
Brd7	Bromodomain-containing protein 7	O88665	1.90071	0.690078	2.23871	1.60983	0.470113	0.0378602
L factor type I (LF1)	Large T antigen	Q04187	-0.199634		-0.253838	-0.226736	0.0271022	0.0378685
Ttll12	Tubulin--tyrosine ligase-like protein 12	Q3UDE2	-0.266428	-0.130456	-0.109092	-0.168659	0.0492724	0.037887
Tjp1	Tjp1 protein (Fragment)	Q91YW2	0.912342	0.29603	0.929253	0.712542	0.208313	0.0379354
Telo2	Telomere length regulation protein TEL2 homolog	Q9DC40	0.152433	0.418645	0.235506	0.268861	0.0786376	0.0379657
Fnbp1	Formin-binding protein 1	Q80TY0	0.262612	0.226798	0.546266	0.345225	0.10105	0.0380176
Dis3l	DIS3-like exonuclease 1	Q8C0S1	-0.484018	-0.149351	-0.431499	-0.354956	0.103915	0.038028
Rpl12	60S ribosomal protein L12	P35979	-0.430067	-0.132233	-0.344676	-0.302325	0.0885467	0.0380585
Fam21	WASH complex subunit FAM21	Q6PGL7	0.369817	0.439892	0.134885	0.314865	0.0922355	0.0380703
Baz1b	Tyrosine-protein kinase BAZ1B	Q9Z277	0.0255896	0.0667863	0.0834066	0.0585942	0.0171856	0.0381539
Atxn1l	Ataxin-1-like	P0C7T6	2.2625		1.77571	2.0191	0.243397	0.0381871
Cpne3	Putative uncharacterized protein	Q3UJS6	0.105738	0.212142	0.0848212	0.134234	0.0394195	0.0382381
Csrp1	Cysteine and glycine-rich protein 1	P97315	0.702771	0.231559	0.454801	0.463043	0.13609	0.0382935
Srfbp1	Serum response factor-binding protein 1	Q9CZ91	-0.0986938	-0.217902	-0.311396	-0.20933	0.0615511	0.038325
Cbwd1	COBW domain-containing protein 1	Q8VEH6	0.472949	0.278461	0.16469	0.305367	0.089998	0.0384832
Fasn	Fatty acid synthase	P19096	-0.125687	-0.067674	-0.201727	-0.131696	0.0388142	0.0384842
1810009A15Rik	MCG127334	Q9D937	-0.845328	-0.317282	-1.04361	-0.735408	0.216757	0.0384884
	UPF0428 protein CXorf56 homolog	Q8VDP2	0.217387	0.170275		0.193831	0.023556	0.038495
Psmc3	Putative uncharacterized protein	Q3U8Y7	-0.190733	-0.0655621	-0.215431	-0.157242	0.0463911	0.0385547
Dph5	Diphthine synthase	Q9CWQ0	-0.571604	-0.290794	-0.222754	-0.361717	0.106766	0.0385858
Ptges3	Putative uncharacterized protein	Q3TJG6	-0.0774924	-0.0943758	-0.0285623	-0.0668102	0.0197352	0.0386389
Atp5b	ATP synthase subunit beta, mitochondrial	P56480	-0.231006	-0.0852604	-0.125043	-0.147103	0.0434949	0.0387048
Dusp16	Dual specificity phosphatase 16	Q6PCP3	3.392		2.65255	3.02227	0.369723	0.0387472
Klhl25	Ectoderm-neural cortex protein 2	Q8R2P1	0.240979	0.308156		0.274568	0.0335887	0.0387473
Uaca	Uveal autoantigen with coiled-coil domains and ankyrin repeats	Q8CGB3	-0.114015	-0.296781	-0.377309	-0.262702	0.0778929	0.0388978
Shmt2	Putative uncharacterized protein	Q3TFD0	-0.112811	-0.0390673	-0.129999	-0.0939591	0.0278908	0.0389752
Cspg4	Chondroitin sulfate proteoglycan 4	Q8VHY0	1.11048	1.15825	0.355477	0.874737	0.259996	0.0390655
Wdr43	Wrd43 protein (Fragment)	Q68FC6	-0.113966	-0.301605	-0.379441	-0.265004	0.0787907	0.0390868
Hist1h1a	Histone H1.1	P43275	-1.07817	-0.340022	-1.09881	-0.838998	0.249559	0.039117
Fam65b	Protein FAM65B	Q80U16	-0.332857	-1.11171	-0.878829	-0.774465	0.230811	0.0392517
Unc5c	Netrin receptor UNC5C	O08747	-0.569277	-1.33181	-0.600993	-0.834028	0.249061	0.0393912
Hsp90ab1	Heat shock protein HSP 90-beta	P11499	-0.133536	-0.200836	-0.0635349	-0.132636	0.0396381	0.0394437
Rpl22l1	MCG16976, isoform CRA_c	Q0VBA4	-0.412994	-0.157442	-0.528038	-0.366158	0.109515	0.0395003
Nufip1	Nuclear fragile X mental retardation-interacting protein 1	Q9QXX8	-0.264951	-0.119636	-0.112799	-0.165795	0.0496169	0.0395411
Plcd1	Plcd1 protein	Q05DG3	0.883386	0.686693		0.78504	0.0983462	0.0396698
Mars	Methionine--tRNA ligase, cytoplasmic	Q68FL6	-0.0886959	-0.0962399	-0.21102	-0.131985	0.0395772	0.0396801
Plaur	Urokinase plasminogen activator surface receptor	P35456	0.880899	0.570776	0.280965	0.577547	0.173219	0.0396945
Ttc3	E3 ubiquitin-protein ligase TTC3	G5E8T2	0.610168	0.261071	0.272682	0.381307	0.11448	0.0397664
Kat2a	Putative uncharacterized protein	Q3UM02	-0.606644	-1.57228	-0.784459	-0.987794	0.296716	0.0398022
Eif2b2	Translation initiation factor eIF-2B subunit beta	Q99LD9	-0.119568	-0.353498	-0.206169	-0.226411	0.068284	0.040086
Impact	Protein IMPACT	O55091	0.392462	0.147932	0.503672	0.348022	0.10507	0.0401593
Rcn3	Reticulocalbin-3	Q8BH97	0.287937	0.977242	0.744217	0.669799	0.202434	0.040236
Sf3b1	Splicing factor 3B subunit 1	Q99NB9	-0.134248	-0.37756	-0.205128	-0.238979	0.0722486	0.0402573
Angel2	Protein angel homolog 2	Q8K1C0		-0.887517	-1.14689	-1.0172	0.129685	0.0403642
Taf5	Transcription initiation factor TFIID subunit 5	F8VPY2	-0.252932	-0.0782423	-0.167632	-0.166269	0.0504331	0.0404927
Copg1	Coatomer subunit gamma-1	Q9QZE5	0.132917	0.0394667	0.128628	0.100337	0.0304605	0.0405535
Rpl7	60S ribosomal protein L7	P14148	-0.258177	-0.0887224	-0.307301	-0.218067	0.0662086	0.0405618
Mcu	Calcium uniporter protein, mitochondrial	Q3UMR5	-0.404963	-0.274579	-0.123597	-0.267713	0.081296	0.0405741
Tmf1	TATA element modulatory factor	B9EKI3	0.284544	0.120371	0.402665	0.269193	0.0818521	0.0406674
Cnpy4	Protein canopy homolog 4	Q8BQ47	0.228578	0.0762439	0.132963	0.145928	0.0444503	0.0407945
Srsf6	Protein Srsf6	Q3TWW8	-0.0281663	-0.037951	-0.0752916	-0.0471363	0.0143582	0.0407963
Map2k2	Putative uncharacterized protein	Q3UPM3	-0.122498	-0.427513	-0.355391	-0.3018	0.0920371	0.0408788
Ddx1	Putative uncharacterized protein	Q3V1Z7	-0.0397732	-0.136298	-0.101465	-0.0925119	0.0282215	0.0409018
Gtf2h1	General transcription factor IIH subunit 1	Q9DBA9	0.337358	0.437555		0.387457	0.0500988	0.0409309
Mrps11	28S ribosomal protein S11, mitochondrial	Q3U8Y1	-0.110846	-0.143773		-0.127309	0.0164635	0.0409364
Plekhg5	Pleckstrin homology domain-containing family G member 5	Q66T02		0.394565	0.51184	0.453202	0.0586374	0.0409568
Ndufaf4	NADH dehydrogenase [ubiquinone] 1 alpha subcomplex assembly factor 4	Q9D1H6	-1.88716	-2.44808		-2.16762	0.280458	0.0409571
Cul4b	Cullin-4B	A2A432	-0.241539	-0.117867	-0.0926279	-0.150678	0.0460109	0.0409729
Lclat1	Lysocardiolipin acyltransferase 1	Q3UN02	-0.321063	-0.247328		-0.284195	0.0368675	0.0410637
Arhgap1	Rho GTPase-activating protein 1	Q5FWK3	0.363108	0.125237	0.200323	0.229556	0.0702059	0.0410852
Odc1	Ornithine decarboxylase	P00860	-0.727596	-0.560266		-0.643931	0.0836649	0.0411271
Plekhh2	Pleckstrin homology domain-containing family H member 2	Q8C115	0.171596	0.237277	0.0695097	0.159461	0.0488089	0.041145
Ddx39	Putative uncharacterized protein	Q3T9L0	-0.249689	-0.344025	-0.0998758	-0.231196	0.0710837	0.0414702
Vps51	Vacuolar protein sorting-associated protein 51 homolog	Q3UVL4	0.393956	0.14578	0.197659	0.245798	0.0755777	0.0414747
Sod1	Superoxide dismutase [Cu-Zn]	P08228	0.0339216	0.115589	0.0811005	0.0768703	0.02367	0.0415798
Obsl1	Protein Obsl1	D3YYU8	0.0260294	0.0530706	0.083978	0.0543594	0.0167407	0.0415898
Agxt2l2	5-phosphohydroxy-L-lysine phospho-lyase	Q8R1K4	-0.161413	-0.544541	-0.555784	-0.420579	0.129624	0.0416466
Pet112	Glutamyl-tRNA(Gln) amidotransferase subunit B, mitochondrial	Q99JT1	-0.148671	-0.0644342	-0.217386	-0.143497	0.0442291	0.0416513
Ube2j1	Putative uncharacterized protein	Q3TV38	-0.298452	-0.103191	-0.161486	-0.18771	0.0578718	0.0416708
Wdr1	WD repeat-containing protein 1	O88342	0.238221	0.105951	0.0978802	0.147351	0.0454949	0.0417771
Yae1d1	Putative uncharacterized protein	Q8BPG2	0.552403	0.423174		0.487789	0.0646146	0.0419207
Upf2	Upf2 protein (Fragment)	Q810R2	0.0464371	0.165814	0.132773	0.115008	0.0355874	0.0419392
Krt2	Keratin, type II cytoskeletal 2 epidermal	Q3TTY5	-6.69744	-3.42615	-2.41088	-4.17816	1.29329	0.0419634
Mdh1	Malate dehydrogenase, cytoplasmic	P14152	0.121872	0.311721	0.145004	0.192866	0.0598018	0.0420903
Pef1	Peflin	Q8BFY6	0.253643	0.276084	0.0775621	0.20243	0.0627691	0.0420924
Tnks2	Tankyrase-2	Q3UES3	0.282491	0.36937		0.32593	0.0434395	0.0421753
Abce1	ATP-binding cassette sub-family E member 1	P61222	-0.0814836	-0.141973	-0.248651	-0.157369	0.0488671	0.042199
Phkb	Phosphorylase b kinase regulatory subunit beta	Q7TSH2	-1.33596	-0.59116	-1.99859	-1.30857	0.406519	0.0422311
Gnao1	Guanine nucleotide-binding protein G(o) subunit alpha	P18872	0.518327	0.244159	0.199525	0.32067	0.0996647	0.0422648
Rps9	40S ribosomal protein S9	Q6ZWN5	-0.330094	-0.530443	-0.163425	-0.34132	0.106098	0.0422751
Fkbp4	Peptidyl-prolyl cis-trans isomerase FKBP4	P30416	-0.32464	-0.101459	-0.19758	-0.207893	0.0646329	0.0422871
Mycbp	Putative uncharacterized protein (Fragment)	Q3V1X1	0.0585148	0.16297	0.210053	0.143846	0.0447783	0.0423821
Fam65a	Protein FAM65A	Q68FE6	0.726169	0.267018	0.955065	0.649417	0.202295	0.0424322
Nop9	Putative uncharacterized protein	Q3U480	-0.414637	-0.118581	-0.410717	-0.314645	0.0980384	0.0424516
Fryl	Protein Fryl	F8VQ05	-0.0676292	-0.164958	-0.0723975	-0.101661	0.031678	0.0424562
Ipo7	Importin-7	Q9EPL8	-0.317293	-0.107761	-0.170574	-0.198543	0.0620823	0.042716
Atp6v1d	V-type proton ATPase subunit D	P57746	0.343585	0.45115		0.397367	0.0537825	0.0428221
Lgals3	Galectin-3	P16110	0.172958	0.220852	0.0607105	0.151507	0.0474568	0.0428456
Smad4	Mothers against decapentaplegic homolog 4	P97471	-0.371259	-0.16777	-0.146309	-0.228446	0.071675	0.0429698
Cd97	Cd97 protein	Q4FJS6	1.02208		1.34362	1.18285	0.160774	0.0430015
Stat2	Putative uncharacterized protein	Q3UDU1	0.890318	1.17151		1.03091	0.140594	0.0431445
Ruvbl2	RuvB-like protein 2	Q3TXT7	-0.187719	-0.0510973	-0.17229	-0.137035	0.0431992	0.0433275
Elp2	Elongator complex protein 2	Q91WG4	-0.101761	-0.134082		-0.117921	0.0161604	0.0433524
Prnp	Major prion protein	P04925		0.345027	0.455112	0.40007	0.0550425	0.0435205
Atp5h	ATP synthase subunit d, mitochondrial	Q9DCX2	0.092895	0.0273647	0.0593175	0.059859	0.0189189	0.0435236
Cwc22	MKIAA1604 protein (Fragment)	Q6ZPL7	-0.349937	-0.0937868	-0.303518	-0.249081	0.0787947	0.0435921
Cdca2	Cell division cycle-associated protein 2	Q14B71	0.140744	0.219657	0.0642708	0.141557	0.0448581	0.0437238
Ajuba	LIM domain-containing protein ajuba	Q91XC0	-0.0738363	-0.114861	-0.21845	-0.135716	0.0430289	0.0437629
Soga1	Uncharacterized protein	A2ACV6	-0.150038	-0.126559	-0.039683	-0.105426	0.0335632	0.0440774
Kif20a	Kinesin-like protein KIF20A	P97329	-0.152371	-0.0737646	-0.24769	-0.157942	0.0502852	0.0440827
Kras	GTPase KRas	P32883	0.810615	1.72328	0.637504	1.05713	0.336803	0.0441363
Fads1	Fatty acid desaturase 1	Q920L1	0.508103	0.383221		0.445662	0.0624407	0.0443093
Rbm39	Putative uncharacterized protein	Q3U313	-0.423212	-0.129146	-0.248502	-0.266953	0.0853895	0.0444424
Prdx1	Peroxiredoxin-1	P35700	0.0824352	0.171634	0.061837	0.105302	0.0336948	0.0444704
Mcm3	DNA replication licensing factor MCM3	P25206	0.0502366	0.1004	0.0348683	0.0618349	0.0197862	0.0444709
Dnajb11	DnaJ homolog subfamily B member 11	Q99KV1	0.45205	0.222796	0.159073	0.277973	0.0889611	0.0444832
Nes	Nestin	Q6P5H2	0.0747064	0.262768	0.17135	0.169608	0.0542957	0.0445048
Rabl6	Rab-like protein 6	Q5U3K5	-0.0936607	-0.179742	-0.0601882	-0.111197	0.0356086	0.0445303
Afmid	Kynurenine formamidase	Q8K4H1	-0.324413	-0.140384	-0.49553	-0.320109	0.102544	0.0445576
Elmsan1	Uncharacterized protein	E9Q2I4	-0.539138	-1.19098	-0.452324	-0.727482	0.233102	0.044577
Rbbp7	Putative uncharacterized protein	Q3UJI2	0.140125	0.220822	0.0635844	0.14151	0.0453958	0.0446672
Lrrc8e	Leucine-rich repeat-containing protein 8E	Q66JT1		0.546526	0.411225	0.478876	0.0676503	0.0446717
Rsu1	Ras suppressor protein 1	Q01730	0.572457	0.219888	0.255508	0.349284	0.112059	0.0446743
Utrn	Protein Utrn	E9Q6R7	0.0432647	0.0919237	0.0335784	0.0562556	0.0180519	0.0446905
Add3	Add3 protein (Fragment)	Q05DT0	0.198594	0.616737	0.335238	0.383523	0.123098	0.044709
Stx5	Syntaxin-5	Q8K1E0	0.111929	0.152627	0.0408183	0.101791	0.0326719	0.0447095
Ddx56	Probable ATP-dependent RNA helicase DDX56	Q9D0R4	-0.565815	-1.01555	-0.320573	-0.63398	0.203498	0.0447131
Jam3	Junctional adhesion molecule C	Q9D8B7	-1.34409		-1.7874	-1.56574	0.221652	0.0447637
Abt1	Activator of basal transcription 1	Q9QYL7	-0.247304	-0.716604	-0.358281	-0.44073	0.141609	0.0447908
Faf1	FAS-associated factor 1	P54731	-0.633553	-0.203521	-0.343657	-0.393577	0.126624	0.044893
Kti12	Protein KTI12 homolog	Q9D1R2	-0.148136	-0.381509	-0.546616	-0.358754	0.115593	0.0450095
Ttf2	Transcription termination factor 2	Q5NC05	0.133283	0.129494	0.318953	0.19391	0.0625311	0.0450747
Msra	Mitochondrial peptide methionine sulfoxide reductase	Q9D6Y7	-0.222445	-0.485094	-0.179941	-0.295827	0.0954258	0.0450986
Hist1h3a	Histone H3.1	P68433	-0.760771	-0.208392	-0.515834	-0.494999	0.159798	0.0451597
Col1a1	Collagen alpha-1(I) chain	P11087	0.228169	0.0596405	0.214919	0.167576	0.0541033	0.0451677
Eif3a	Eukaryotic translation initiation factor 3 subunit A	P23116	-0.120508	-0.0990342	-0.0309844	-0.0835089	0.0269839	0.045233
Pdp2	MCG53395	Q504M2	0.163348	0.0512106	0.0902851	0.101615	0.0328633	0.0453022
Aim1	Protein Aim1	E9PVP1	-0.150264	-0.300798	-0.102622	-0.184561	0.0597235	0.0453475
Mical1	Protein-methionine sulfoxide oxidase MICAL1	Q8VDP3	1.07167	0.293495	0.719591	0.694918	0.224978	0.045384
Ncapd3	Putative uncharacterized protein	Q3UTU7	0.172801	0.375838	0.13818	0.228939	0.0741259	0.0453919
Ppfia1	Ppfia1 protein	B2RXQ2	0.113723	0.0634254	0.204278	0.127142	0.0412105	0.0454769
Tmem192	Transmembrane protein 192	Q9CXT7	0.204528		0.273268	0.238898	0.0343701	0.0454829
Cryzl1	Quinone oxidoreductase-like protein 1	Q921W4	0.148035	0.11073		0.129382	0.0186527	0.0455758
Cpt1a	Carnitine O-palmitoyltransferase 1, liver isoform	P97742	0.288765	0.849728	0.423911	0.520802	0.169027	0.04558
Pde8a	High affinity cAMP-specific and IBMX-insensitive 3',5'-cyclic phosphodiesterase 8A	O88502	1.01824	0.395312	1.4741	0.962553	0.312662	0.0456468
Ccnyl1	Protein Ccnyl1	D3YUJ3	0.449187	0.11571	0.344436	0.303111	0.0984591	0.0456473
Mrps28	28S ribosomal protein S28, mitochondrial	Q9CY16	-0.187758	-0.140345		-0.164052	0.0237064	0.0456814
Lrrc47	Leucine-rich repeat-containing protein 47	Q505F5	-0.216723	-0.106347	-0.0745129	-0.132528	0.0430889	0.0457212
Cux1	Homeobox protein cut-like 1	P53564	-0.0283246	-0.107809	-0.107306	-0.0811466	0.0264114	0.0458056
Gcdh	Glutaryl-CoA dehydrogenase, mitochondrial	Q60759	0.0828014	0.110876		0.0968385	0.014037	0.0458209
Sfr1	Swi5-dependent recombination DNA repair protein 1 homolog	Q8BP27	-0.147624	-0.440638	-0.221991	-0.270084	0.0879376	0.0458338
Hspb1	Heat shock protein beta-1	P14602	0.898127	0.275332	0.501169	0.558209	0.182033	0.0459582
Ttc17	Protein Ttc17	A2AFY7	0.278299		0.207617	0.242958	0.0353411	0.0459795
Emg1	Ribosomal RNA small subunit methyltransferase NEP1	O35130	-0.38453	-0.0968363	-0.329456	-0.270274	0.0881641	0.0459827
Gart	Putative uncharacterized protein	Q3UJP8	-0.168126	-0.0446263	-0.116309	-0.109687	0.0358047	0.0460371
Il1rl1	Interleukin-1 receptor-like 1	P14719	0.628909	0.221822	0.297344	0.382692	0.125024	0.0461033
Mt2	Metallothionein-2	P02798	0.121441	0.484381	0.404276	0.336699	0.110085	0.0461661
Hddc2	HD domain-containing protein 2	Q3SXD3	0.393905	0.0987465	0.342732	0.278461	0.0910635	0.0461833
Rgs12	Putative uncharacterized protein (Fragment)	Q3UML5	0.297168		0.399413	0.348291	0.0511224	0.0463905
Atn1	Atrophin-1	O35126	1.17758	0.371619	0.62623	0.725144	0.23786	0.0464265
Rps20	40S ribosomal protein S20	P60867	-0.302517	-0.0758195	-0.238433	-0.20559	0.0674708	0.0464666
Cul1	Putative uncharacterized protein	Q3UIA5	-0.156876	-0.101924	-0.310271	-0.18969	0.0623425	0.0465823
Kiaa1033	WASH complex subunit 7	Q3UMB9	0.203528	0.0802336	0.0846233	0.122795	0.0403865	0.0466411
Rab7a	Ras-related protein Rab-7a	P51150	-0.731767	-0.236294	-0.374668	-0.447576	0.147603	0.0468593
Arhgef7	Rho guanine nucleotide exchange factor 7	Q9ES28	0.501798	0.151864	0.27721	0.310291	0.102362	0.046886
Prkar2b	cAMP-dependent protein kinase type II-beta regulatory subunit	P31324	-0.130605	-0.078718	-0.0369509	-0.0820912	0.027088	0.0469064
Prep	Prolyl endopeptidase	Q543B9	-0.176352	-0.109819	-0.0487654	-0.111645	0.0368423	0.046911
Eif2b4	Translation initiation factor eIF-2B subunit delta	Q61749	-0.0499533	-0.13932	-0.0634606	-0.0842448	0.0278125	0.0469469
Pdia6	Putative uncharacterized protein	Q3THH1	0.0585812	0.220902	0.146744	0.142076	0.0469161	0.0469663
Idi1	Isopentenyl-diphosphate Delta-isomerase 1	P58044	-0.37824	-0.124893	-0.188209	-0.230447	0.0761233	0.0469933
Eral1	GTPase Era, mitochondrial	Q9CZU4	-0.691425	-0.91745	-0.228891	-0.612589	0.20264	0.0471075
Atp11c	Probable phospholipid-transporting ATPase 11C	Q9QZW0	-0.243824	-0.299737	-0.670717	-0.404759	0.133955	0.0471458
Maged2	Mage-d2	Q99PB4		0.21374	0.158154	0.185947	0.0277929	0.0472271
Rpl11	60S ribosomal protein L11	Q9CXW4	-0.385265	-0.282032	-0.0966906	-0.254663	0.0844209	0.0472815
Leo1	RNA polymerase-associated protein LEO1	Q5XJE5	0.380075	0.284867	0.0944195	0.25312	0.0839754	0.0473455
Rbm27	RNA-binding protein 27	Q5SFM8	-0.0704278	-0.181536	-0.27047	-0.174144	0.0578653	0.0474741
Nup62	Putative uncharacterized protein	Q3TFE2	-0.271913	-0.0999601	-0.119108	-0.16366	0.0544078	0.0475135
Atp5i	ATP synthase subunit e, mitochondrial	Q06185	-0.0942785	-0.237557	-0.0961523	-0.142662	0.0474502	0.0475532
Bms1	Putative uncharacterized protein (Fragment)	Q3V0N4	-0.363634	-0.218595	-0.101462	-0.227897	0.0758252	0.0475809
Sec24d	Protein Sec24d	Q6NXL1	0.478534	0.238579	0.155687	0.290933	0.0968046	0.0475862
Fam83h	Protein FAM83H	Q148V8	-0.157015	-0.241537	-0.483953	-0.294168	0.0979791	0.0476685
Haus5	HAUS augmin-like complex subunit 5	Q9D786	0.545531		0.402444	0.473987	0.0715436	0.0476857
Lrp1	Prolow-density lipoprotein receptor-related protein 1	Q91ZX7	0.105359	0.269918	0.110473	0.161917	0.0540207	0.047807
Nop56	Nucleolar protein 56	Q9D6Z1	-0.227464	-0.0640288	-0.266997	-0.186163	0.0621245	0.0478258
Ankrd52	Serine/threonine-protein phosphatase 6 regulatory ankyrin repeat subunit C	Q8BTI7	-0.0955375	-0.245757	-0.369402	-0.236899	0.0791818	0.0479575
Noc3l	Nucleolar complex protein 3 homolog	Q8VI84	-0.774441	-0.222409	-0.442494	-0.479781	0.160445	0.0479994
Gchfr	GTP cyclohydrolase 1 feedback regulatory protein	P99025	0.324019	0.190337	0.0905686	0.201642	0.0676279	0.0482402
Tfap2a	Transcription factor AP-2-alpha	P34056	-0.226306	-0.0698081	-0.291384	-0.195833	0.0657532	0.0483331
Rbm33	RNA-binding protein 33	Q9CXK9	-0.278188	-0.25522	-0.0662848	-0.199898	0.0671346	0.0483536
Plcb1	Plcb1 (Fragment)	Q2M4J2	1.71729	0.607191	2.44465	1.58971	0.53425	0.0484088
Ndufa5	NADH dehydrogenase [ubiquinone] 1 alpha subcomplex subunit 5	Q9CPP6	-0.103926	-0.0430159	-0.163512	-0.103485	0.034785	0.0484258
Plin2	Perilipin-2	P43883	-0.19466	-0.275196	-0.583576	-0.351144	0.118519	0.0487691
Dnm1	Dynamin-1	P39053	0.239497	0.581519	0.220699	0.347238	0.117266	0.0488161
Dnm1l	Dynamin-1-like protein	E9PUD2	0.0951505	0.143395	0.0363334	0.0916261	0.0309561	0.0488512
Dtx2	MKIAA1528 protein (Fragment)	Q69ZH4		0.154881	0.113353	0.134117	0.0207636	0.0488917
Plgrkt	Plasminogen receptor (KT)	Q9D3P8	0.153993	0.305934	0.542163	0.33403	0.112932	0.0489102
Fem1c	Protein fem-1 homolog C	Q8CEF1	-0.341319	-0.122261	-0.148811	-0.20413	0.0690211	0.0489183
Glyr1	Putative oxidoreductase GLYR1	D3YYT1	-0.185364	-0.217688	-0.0504723	-0.151175	0.0512085	0.0490709
Srsf1	Serine/arginine-rich splicing factor 1	Q6PDM2	-0.144868	-0.0345214	-0.141555	-0.106982	0.0362427	0.0490804
Rqcd1	Cell differentiation protein RCD1 homolog	Q9JKY0	-0.252843	-0.0950036	-0.104326	-0.150724	0.0511303	0.0491935
Rabep2	Rab GTPase-binding effector protein 2	Q91WG2	0.147024	0.197028	0.0465503	0.130201	0.0442461	0.0493426
Arg1	Arginase-1	Q61176	-0.158687	-0.510746	-0.678523	-0.449319	0.153175	0.0496101
Polr2h	DNA-directed RNA polymerases I, II, and III subunit RPABC3	Q923G2	-0.468419	-0.141753	-0.240749	-0.28364	0.0967081	0.0496223
Gins1	MKIAA0186 protein (Fragment)	Q6ZQH1	0.875194	0.46468	0.257306	0.532393	0.181554	0.0496375
Pex19	Peroxisome biogenesis factor 19, isoform CRA_e	Q3TDI5	0.149485	0.344437	0.121838	0.205254	0.070048	0.0497026
Cd47	Putative uncharacterized protein	Q3U967	0.11662	0.29838	0.116682	0.177228	0.0605764	0.0498335
Scaf8	Protein SCAF8	Q6DID3	-0.291191	-0.494546	-0.132654	-0.306131	0.104736	0.0499152
Hist1h2bf	Histone H2B type 1-F/J/L	P10853	-0.776236	-0.340595	-1.2931	-0.803311	0.275298	0.0500591
Cstf1	Cleavage stimulation factor subunit 1	Q99LC2	-0.0444802	-0.116209	-0.0461415	-0.0689434	0.0236374	0.0500963
Tars	Putative uncharacterized protein	Q3U630	-0.169977	-0.0441888	-0.103633	-0.105933	0.0363301	0.0501216
Synm	Synemin	Q70IV5	0.664137	0.149481	0.553777	0.455798	0.156437	0.0501868
Rpl3	60S ribosomal protein L3	P27659	-0.251412	-0.077247	-0.33547	-0.221376	0.0760404	0.0502552
Srsf7	MCG17902, isoform CRA_a	Q3THA6	-0.204011	-0.0589617	-0.108415	-0.123796	0.0425726	0.0503564
Mier1	Mesoderm induction early response 1 homolog (Xenopus laevis)	Q32P49	0.208122	0.0945761	0.0693794	0.124026	0.0426727	0.0503987
Plxnb2	Plexin-B2	B2RXS4	0.0281026	0.124146	0.118582	0.0902769	0.0311286	0.0505864
Phb2	Prohibitin-2	O35129	-0.433393	-0.126548	-0.226164	-0.262035	0.0903763	0.0506086
Trim16	Tripartite motif-containing protein 16	Q5SVT2	0.412793	0.092946	0.321927	0.275889	0.095158	0.0506119
Haus1	HAUS augmin-like complex subunit 1	Q8BHX1	-0.0915941	-0.0283681	-0.123957	-0.0813064	0.0280694	0.050691
Actr2	Actin-related protein 2	P61161	-0.0766195	-0.0204121	-0.0921775	-0.0630697	0.0217965	0.0507821
Rsrc1	Serine/Arginine-related protein 53	Q3TGY1	-0.11739	-0.23932	-0.073602	-0.143438	0.0495799	0.0507973
Ncln	Nicalin	Q8VCM8	-0.0786263	-0.056756		-0.0676912	0.0109352	0.050981
Eftud1	Elongation factor Tu GTP-binding domain-containing protein 1	Q8C0D5	0.248376	0.130298	0.462465	0.280379	0.0972146	0.0510657
Ndrg3	Putative uncharacterized protein	Q544I1	0.648381	0.256482	0.243434	0.382766	0.132861	0.0511619
Vcp	Transitional endoplasmic reticulum ATPase	Q01853	-0.0519114	-0.021734	-0.0183964	-0.0306806	0.010659	0.0512401
Fam175b	BRISC complex subunit Abro1	Q3TCJ1	0.355315	0.843737	0.296802	0.498618	0.173384	0.0513181
Crabp2	Cellular retinoic acid-binding protein 2	P22935	0.532737	0.12538	0.360092	0.339403	0.118048	0.0513384
Ttpal	Alpha-tocopherol transfer protein-like	Q9D3D0	-0.413879		-0.57492	-0.494399	0.0805207	0.0513905
Chd2	Protein Chd2	E9PZM4	0.0908593	0.111897	0.262152	0.15497	0.0539343	0.0513939
Dnajc7	DnaJ homolog subfamily C member 7	Q9QYI3	-0.14459	-0.055417	-0.0554615	-0.0851563	0.029717	0.0516301
Mcl1	Induced myeloid leukemia cell differentiation protein Mcl-1 homolog	P97287	-0.0715323	-0.134693	-0.25435	-0.153525	0.0536085	0.0516838
Sdf4	45 kDa calcium-binding protein	Q61112	-0.631615	-0.153873	-0.716831	-0.500773	0.175186	0.0518465
Cgnl1	Cingulin-like 1	B2RSU6	-0.138813	-0.0469913	-0.0600666	-0.0819569	0.0286774	0.0518663
Cenpc1	Centromere protein C 1	P49452		-0.309798	-0.43183	-0.370814	0.0610162	0.0519116
Nup214	Nuclear pore complex protein Nup214	Q80U93	-0.171037	-0.0490995	-0.0877832	-0.10264	0.0359755	0.0520159
Slc30a9	Zinc transporter 9	Q5IRJ6	0.243264	0.723139	0.313819	0.426741	0.149592	0.0520269
Ppm1d	Putative uncharacterized protein (Fragment)	Q3TAP1	-0.506401	-0.652949	-1.50505	-0.888133	0.311346	0.0520309
Anp32a	Acidic leucine-rich nuclear phosphoprotein 32 family member A	O35381	-0.266087	-0.166914	-0.064612	-0.165871	0.0581633	0.0520539
Birc2	Baculoviral IAP repeat-containing protein 2	Q62210	-0.806687		-1.12561	-0.966149	0.159462	0.0520673
Atp11b	Putative uncharacterized protein	Q3U2B7		1.33309	0.955189	1.14414	0.18895	0.0520975
Golga5	Golgin subfamily A member 5	Q9QYE6	0.29333	0.568179	0.161866	0.341125	0.119702	0.0521171
Gls	Glutaminase kidney isoform, mitochondrial	D3Z7P5	0.430035	0.304101	0.947005	0.56038	0.196701	0.0521448
Rsrc2	Rsrc2 protein (Fragment)	Q922F2	-0.866176	-0.185544	-0.692418	-0.581379	0.204175	0.0521895
Ap3d1	AP-3 complex subunit delta-1	O54774	0.256138	0.0802604	0.119197	0.151865	0.0533343	0.0521905
Anxa11	Annexin A11	P97384	0.12465	0.313127	0.114251	0.184009	0.0646285	0.052198
Pcm1	Pericentriolar material 1 protein	Q9R0L6	0.203932	0.0446309	0.151493	0.133352	0.0468723	0.0522658
Gng5	Guanine nucleotide-binding protein subunit gamma	Q3UKC8	0.174979	0.383533	0.122218	0.22691	0.0797788	0.0522899
Ctps2	CTP synthase 2	P70303	1.08356	0.78707	0.239282	0.703306	0.247296	0.0522976
Gmds	GDP-mannose 4,6 dehydratase	Q8K0C9	-0.110591	-0.329154	-0.142136	-0.19396	0.0682073	0.052307
Rpl30	60S ribosomal protein L30	P62889	-0.338994	-0.129321	-0.128501	-0.198939	0.070028	0.0523958
Lamtor3	Ragulator complex protein LAMTOR3	O88653	0.327635	0.0892928	0.176447	0.197792	0.0696263	0.0523984
Txn	Thioredoxin	P10639	0.40611	0.437397	0.0929141	0.31214	0.109985	0.0524837
Zfyve9	MCG17975	A2A8R0		-0.406404	-0.290314	-0.348359	0.0580447	0.052555
Gabarapl2	Gamma-aminobutyric acid receptor-associated protein-like 2	P60521	-0.0841991	-0.117881		-0.10104	0.016841	0.0525716
Jmjd1c	Probable JmjC domain-containing histone demethylation protein 2C	Q69ZK6	-0.258562	-0.670316	-1.07467	-0.66785	0.235594	0.0525869
Dync1li1	Dynein cytoplasmic 1 light intermediate chain 1	Q3TWG5	0.00887105	0.0420927	0.0342706	0.0284115	0.0100277	0.0526331
Stat3	Signal transducer and activator of transcription 3	P42227	0.232595	0.258876	0.0544038	0.181958	0.0642269	0.0526403
Fam207a	Protein FAM207A	P58468	-0.0662212	-0.314898	-0.256022	-0.212381	0.07503	0.0527175
	UPF0361 protein C3orf37 homolog	Q8R1M0	-0.529109	-0.741806		-0.635458	0.106348	0.0527822
Palm	Putative uncharacterized protein	Q3TRX4	0.526487	1.18864	0.385116	0.700082	0.247666	0.0528405
Stxbp1	Syntaxin-binding protein 1	O08599	0.368709	0.860054	0.287368	0.505377	0.178886	0.0528908
Grsf1	G-rich sequence factor 1	Q8C5Q4	-0.359984	-0.283227	-0.0757771	-0.239663	0.0848858	0.0529471
Nsa2	5730427N09Rik protein	Q32P03	-0.43234	-0.230536	-0.117326	-0.260067	0.0921278	0.0529616
Gcc2	GRIP and coiled-coil domain-containing protein 2	Q8CHG3	0.139141	0.0424518	0.194887	0.125493	0.0445302	0.0531124
Hip1	Huntingtin-interacting protein 1	Q8VD75	0.115919	0.18568	0.0440333	0.115211	0.0408916	0.0531344
Exosc9	Exosome complex component RRP45	Q9JHI7	-0.183214	-0.144938	-0.038181	-0.122111	0.0433953	0.0532479
Chtop	2500003M10Rik protein (Fragment)	Q2VPR3	-0.209355	-0.451704	-0.138815	-0.266624	0.0947537	0.0532497
Spc24	SPC24, NDC80 kinetochore complex component, homolog (S. cerevisiae)	Q14BA9	0.222849	0.641887	0.262424	0.37572	0.133573	0.0532825
Lig1	DNA ligase 1	P37913	0.325628	0.0674537	0.301518	0.231533	0.0823345	0.0533061
Hmox1	Heme oxygenase 1	P14901	-0.723677	-0.165072	-0.474052	-0.454267	0.161559	0.0533166
Zmynd8	Putative uncharacterized protein	Q3V1I9	-0.371834	-0.427852	-0.0878582	-0.295848	0.105245	0.05334
Mgea5	Bifunctional protein NCOAT	Q9EQQ9	0.378064	0.0776627	0.336774	0.264167	0.0940108	0.0533749
Pea15	Astrocytic phosphoprotein PEA-15	Q62048	0.0442804	0.192052	0.215641	0.150658	0.0536229	0.0533872
Daxx	Death domain-associated protein 6	O35613	0.168067	0.386396	0.125824	0.226763	0.0807431	0.0534237
Espl1	Separin	P60330	1.04685	0.255976	0.622313	0.641712	0.228511	0.0534304
Uros	Uroporphyrinogen-III synthase	P51163	-0.385494		-0.542863	-0.464178	0.0786845	0.0534498
Yy1	Transcriptional repressor protein YY1	Q00899	-0.667919		-0.474221	-0.57107	0.0968488	0.0534739
Peg10	Retrotransposon-derived protein PEG10	Q7TN75	1.51919	0.781291	0.420187	0.906891	0.323411	0.0535624
Naca	Putative uncharacterized protein	Q3UK68	-0.102354	-0.43627	-0.502358	-0.346994	0.123799	0.053603
Nfkb1	Nuclear factor NF-kappa-B p105 subunit	P25799	0.2957	0.236733	0.0604001	0.197611	0.0706857	0.0538381
Dlg5	Putative uncharacterized protein	Q3UGX5	-0.211778	-0.678965	-0.304794	-0.398512	0.142774	0.0539821
Rpl8	60S ribosomal protein L8	P62918	-0.23459	-0.155765	-0.510845	-0.3004	0.107655	0.0540086
Clcn7	H(+)/Cl(-) exchange transporter 7	O70496	0.895592	0.201003	0.584972	0.560522	0.200883	0.054012
Znf768	Zinc finger protein 768	Q8R0T2	-0.867012	-0.216638	-0.493501	-0.525717	0.188437	0.0540254
Bnc2	Bnc2 protein	Q2TBA4	1.03196	0.276749	1.34555	0.884752	0.317194	0.0540442
Yars2	Tyrosine--tRNA ligase, mitochondrial	Q8BYL4	-0.12218	-0.0301758	-0.149453	-0.100603	0.0360829	0.0540837
Bag2	BAG family molecular chaperone regulator 2	Q91YN9	0.141782	0.313411	0.0966948	0.183963	0.06602	0.0541371
Eef1g	Eukaryotic translation elongation factor 1 gamma	Q4FZK2	-0.263323	-0.0581746	-0.174067	-0.165188	0.0593874	0.0542991
Mrps5	Putative uncharacterized protein	Q3U2U4	-0.410126	-0.132761	-0.176027	-0.239638	0.0861543	0.0543005
Unc45a	Protein unc-45 homolog A	Q99KD5	0.161255	0.299281	0.0777411	0.179426	0.0645951	0.0544258
Mgat4b	Alpha-1,3-mannosyl-glycoprotein 4-beta-N-acetylglucosaminyltransferase B	Q812F8	-0.993305		-1.40809	-1.2007	0.207392	0.0544432
Poc1b	POC1 centriolar protein homolog B	Q8BHD1	-0.358379	-0.252777		-0.305578	0.0528012	0.0544634
Sap18	Histone deacetylase complex subunit SAP18	O55128	0.17948	0.246756	0.0511894	0.159142	0.0573638	0.0545396
Bcap31	Putative uncharacterized protein	Q3U9U5	0.106007	0.0842553	0.254296	0.148186	0.0534251	0.0545577
Rhod	Rho-related GTP-binding protein RhoD	P97348	1.86185		1.31145	1.58665	0.2752	0.0546661
Lgals9	Galectin-9	O08573	0.331057	0.763385	0.242659	0.4457	0.160879	0.0546673
Laptm4a	Lysosomal-associated transmembrane protein 4A	Q60961	-0.542534	-0.382073		-0.462303	0.0802307	0.0546965
Gng12	Guanine nucleotide-binding protein G(I)/G(S)/G(O) subunit gamma-12	Q9DAS9	-0.246224	-0.050453	-0.248199	-0.181625	0.0655886	0.0547087
Cdk12	Cyclin-dependent kinase 12	Q14AX6	-0.300652	-0.181081	-0.0702088	-0.183981	0.0665391	0.0548472
Cbx3	Chromobox protein homolog 3	P23198	-0.295869	-0.0918675	-0.130678	-0.172805	0.0625438	0.0549161
Fcgrt	IgG receptor FcRn large subunit p51	Q61559	0.580399		0.825983	0.703191	0.122792	0.0550287
Ddx39b	Spliceosome RNA helicase Ddx39b	Q9Z1N5	-0.208497	-0.681029	-0.304161	-0.397896	0.144235	0.0550596
Stoml2	Stomatin-like protein 2, mitochondrial	Q99JB2	-0.059026	-0.104784	-0.0257413	-0.0631838	0.0229122	0.0550935
Grcc10	Protein C10	O35127	0.275843	0.436159	0.0973989	0.2698	0.0978383	0.0550946
Trmt112	Uncharacterized protein	Q5M8M3	0.30864	0.296643	0.0610392	0.222107	0.0806086	0.0551698
Hip1r	MKIAA0655 protein (Fragment)	Q6ZQ77	0.0337551	0.173301	0.156349	0.121135	0.0439631	0.05517
Tpmt	Thiopurine S-methyltransferase	O55060	0.141667	0.355891	0.12178	0.206446	0.0749425	0.0551919
Znf280c	Zinc finger protein 280C	Q6P3Y5	0.424839	0.0954487	0.264778	0.261688	0.0950992	0.0552925
Pcolce	Putative uncharacterized protein	Q3TX39	-0.183599	-0.164073	-0.0355375	-0.127737	0.0464428	0.0553377
Seh1l	Nucleoporin SEH1	Q8R2U0	0.0446869	0.120601	0.0441377	0.0698086	0.0253968	0.0553947
Hmgcs1	Putative uncharacterized protein	Q3UJ70	-0.490433	-0.123233	-0.266533	-0.2934	0.106849	0.0554896
Celf2	CUGBP Elav-like family member 2	Q9Z0H4	-0.389402	-1.26973	-0.560381	-0.739838	0.269505	0.0555149
Wdr62	WD repeat-containing protein 62	Q3U3T8	0.448329	0.086794	0.416161	0.317095	0.115524	0.0555265
Coq5	2-methoxy-6-polyprenyl-1,4-benzoquinol methylase, mitochondrial	Q9CXI0	0.449679	1.07248	0.345861	0.622672	0.22689	0.0555418
Hspbp1	Hsp70-binding protein 1	Q99P31	-0.231783	-0.0806113	-0.0900819	-0.134159	0.0488888	0.0555492
Serpinb6a	Putative uncharacterized protein	Q3U3L3	0.79596	0.196531	0.439293	0.477261	0.174078	0.0556349
Heatr2	HEAT repeat containing 2	B9EJR8	-0.284752	-0.0560944	-0.215516	-0.185454	0.0676975	0.0557097
Tapbp	Tapasin	Q3TCU5	0.608952	0.117376	0.491677	0.406002	0.148231	0.0557256
Psmb3	Proteasome subunit beta type	Q545G0	0.143564	0.0371969	0.1892	0.12332	0.0450319	0.0557417
Ckap2	Cytoskeleton-associated protein 2	Q3V1H1	0.67131	0.813009	0.155458	0.546592	0.199799	0.0558377
Srp14	Signal recognition particle 14 kDa protein	P16254	-0.136051	-0.596418	-0.358345	-0.363605	0.132923	0.0558461
Pank4	Pantothenate kinase 4	Q80YV4	-0.0369007	-0.160936	-0.194097	-0.130645	0.0478395	0.0560029
Mocs1	Molybdenum cofactor biosynthesis protein 1	Q5RKZ7	-0.303933		-0.435493	-0.369713	0.06578	0.0560478
Ikbkap	Elongator complex protein 1	Q7TT37	-0.139516	-0.0319821	-0.082816	-0.0847714	0.0310578	0.0560517
Snapc2	snRNA-activating protein complex subunit 2	Q91XA5	-0.973843	-0.210819	-0.619848	-0.601503	0.220457	0.0560873
Tead1	TEA domain family member 1, isoform CRA_a	Q3UFP5	-0.372114	-0.0886073	-0.464266	-0.308329	0.113036	0.0561124
Fv1	Friend virus susceptibility protein 1	P70213	-0.385097	-0.268546		-0.326822	0.0582755	0.0561675
Mrpl38	39S ribosomal protein L38, mitochondrial	Q8K2M0	-0.397401	-0.660231	-0.149123	-0.402252	0.147564	0.0561732
Lactb	Lactb protein	Q80UJ8	0.73672	0.840291	0.158226	0.578412	0.21221	0.0561832
Hpcal1	Hippocalcin-like protein 1	P62748	0.02323	0.069115	0.0274133	0.0399195	0.0146477	0.0561952
Mrps6	28S ribosomal protein S6, mitochondrial	P58064	-0.3768	-0.100249	-0.188678	-0.221909	0.0815443	0.0563329
Unk	Putative uncharacterized protein	Q3UYU7	0.121836		0.174978	0.148407	0.0265711	0.0563933
Dph1	Diphthamide biosynthesis protein 1	Q5NCQ5	-0.372493	-0.732822	-0.191631	-0.432315	0.159066	0.0564543
Spen	Msx2-interacting protein	A2ADB0	-0.0517845	-0.205924	-0.26988	-0.175863	0.064728	0.0564851
Dscr3	Down syndrome critical region protein 3 homolog	O35075	0.318553	0.160909	0.621476	0.366979	0.135141	0.0565345
Brd2	Bromodomain-containing protein 2	Q7JJ13	-0.438163		-0.30452	-0.371342	0.0668218	0.0566724
Lin9	Protein lin-9 homolog	Q8C735		0.12261	0.176423	0.149516	0.0269063	0.0566752
Ankrd17	Ankyrin repeat domain-containing protein 17	Q99NH0		-0.190294	-0.273869	-0.232082	0.0417872	0.0567053
Adi1	1,2-dihydroxy-3-keto-5-methylthiopentene dioxygenase	Q99JT9	-0.639765	-0.186549	-0.288981	-0.371765	0.137224	0.0567561
Sypl1	Synaptophysin-like protein 1	O09117	-0.288447	-0.168842	-0.60883	-0.355373	0.131348	0.0568827
Sqle	Squalene monooxygenase	P52019	-0.964202	-0.218176	-1.17964	-0.787341	0.291299	0.0569785
	UPF0600 protein C5orf51 homolog	Q8BR90	0.504917	0.728136		0.616527	0.111609	0.0570061
Myo6	Unconventional myosin-VI	E9PVU0	0.948942	0.203611	0.592025	0.581526	0.215223	0.0570097
Inpp5a	Protein Inpp5a	Q3TZT4	2.84227	0.534538	2.16757	1.84813	0.685065	0.0571592
Xrcc1	DNA repair protein XRCC1	Q60596	0.494457	0.193054	0.165239	0.28425	0.10541	0.057199
Vps28	Putative uncharacterized protein	Q8BMZ7	0.108206	0.0233183	0.128033	0.086519	0.0321145	0.0572891
Simc1	Putative uncharacterized protein	Q3TM32	0.0751362		0.108568	0.091852	0.0167158	0.0573008
Lsm6	U6 snRNA-associated Sm-like protein LSm6	P62313	0.111866	0.0774011		0.0946336	0.0172325	0.0573352
Mettl13	Methyltransferase-like protein 13	Q91YR5	-0.279506	-0.100203	-0.460801	-0.28017	0.104096	0.0573823
Polr2b	DNA-directed RNA polymerase II subunit RPB2	Q8CFI7	-0.257682	-0.0603268	-0.142973	-0.153661	0.0572214	0.0575995
Sptlc1	Serine palmitoyltransferase 1	O35704	0.288027	0.154765	0.0694639	0.170752	0.0635981	0.0576177
3110002H16Rik	Putative uncharacterized protein	Q3TWH4	0.325859		0.224859	0.275359	0.0504997	0.0577352
Erdr1	Erdr1 protein	Q6PED5	-1.73534	-0.389275	-1.00471	-1.04311	0.38905	0.05775
Krt1	Keratin, type II cytoskeletal 1	P04104	-5.21813	-8.43366	-1.78605	-5.14595	1.91934	0.0577522
Vapb	Vesicle-associated membrane protein, associated protein B and C	Q8BH80	-0.22071	-0.532654	-0.165668	-0.306344	0.114265	0.0577562
Tmx2	Thioredoxin-related transmembrane protein 2	Q9D710		0.290706	0.421607	0.356157	0.0654505	0.05785
Fam20b	Glycosaminoglycan xylosylkinase	Q8VCS3	-0.48103	-0.0888297	-0.483569	-0.351143	0.131159	0.0578913
Map2k6	Dual specificity mitogen-activated protein kinase kinase 6	P70236		0.503197	0.346862	0.425029	0.0781676	0.0578938
Il1rap	Putative uncharacterized protein	Q3UEL3	0.0987567	0.132428	0.319635	0.183606	0.0687053	0.0580668
Arrb2	Putative uncharacterized protein	Q3TRC8	0.244329	0.253825	0.695813	0.397989	0.148937	0.0580734
Glrx2	Putative uncharacterized protein	Q3UQ95	-0.458895		-0.315645	-0.38727	0.071625	0.0582131
Cdk5	Cyclin-dependent kinase 5	P49615	0.45712	0.085294	0.476713	0.339709	0.127333	0.05823
Stip1	Putative uncharacterized protein	Q3THQ5	-0.0731894	-0.0326711	-0.137005	-0.0809553	0.0303679	0.0583049
Slc4a1ap	Protein Slc4a1ap	E9PX68	0.0305527	0.165964	0.122412	0.10631	0.0399103	0.0583816
Ppwd1	Peptidylprolyl isomerase domain and WD repeat-containing protein 1	Q8CEC6	0.0902932	0.349056	0.171287	0.203545	0.0764199	0.0583887
Mettl1	tRNA (guanine-N(7)-)-methyltransferase	Q9Z120	-0.719135	-0.318326	-0.206342	-0.414601	0.155661	0.0583896
Jak1	Tyrosine-protein kinase JAK1	P52332	-0.409742	-1.01708	-0.321	-0.582607	0.218741	0.0583908
Kiaa1429	Protein virilizer homolog	A2AIV2	-0.146492	-0.0844441	-0.0324396	-0.087792	0.0329667	0.0584056
Cd3eap	DNA-directed RNA polymerase I subunit RPA34	Q76KJ5	-0.585395	-0.232216	-0.187566	-0.335059	0.12583	0.0584149
Mex3a	Protein Mex3a	G3UYU0	-1.48936		-2.16935	-1.82935	0.339993	0.0584919
Wdr89	WD repeat-containing protein 89	Q9D0R9	-0.314706	-0.244675	-0.0563363	-0.205239	0.0771474	0.0585041
Mina	Bifunctional lysine-specific demethylase and histidyl-hydroxylase MINA	Q8CD15	-0.321334	-0.0592501	-0.233383	-0.204656	0.0770085	0.0586059
Brca1	Breast cancer type 1 susceptibility protein homolog	P48754	0.680497	0.143914	0.410167	0.411526	0.1549	0.0586369
Mcm6	DNA replication licensing factor MCM6	P97311	0.246085	0.141395	0.0542793	0.147253	0.055447	0.0586729
Mcmbp	Mini-chromosome maintenance complex-binding protein	Q8R3C0	-0.151429	-0.054046	-0.0536227	-0.086366	0.0325319	0.0587072
Ccnb2	G2/mitotic-specific cyclin-B2	P30276	-0.49538	-0.109894	-0.623669	-0.409648	0.154385	0.0587583
Gfm1	Elongation factor G, mitochondrial	Q8K0D5	-0.183927	-0.0501629	-0.0848941	-0.106328	0.0400738	0.0587628
Rpp40	Ribonuclease P protein subunit p40	Q8R1F9	-0.225999		-0.154784	-0.190391	0.0356074	0.0588511
Cast	Calpastatin	P51125	0.426955	0.108431	0.210689	0.248691	0.0938927	0.0589332
Pigh	Phosphatidylinositol N-acetylglucosaminyltransferase subunit H	Q5M9N4	0.238084		0.162928	0.200506	0.0375778	0.0589719
Pgd	6-phosphogluconate dehydrogenase, decarboxylating	Q3UAG2	0.449979	0.138233	0.183344	0.257185	0.0972727	0.0591077
Sirt1	NAD-dependent protein deacetylase sirtuin-1	Q3UNI1	-0.169064	-0.531785	-0.209386	-0.303412	0.114778	0.0591265
Prpf40a	Pre-mRNA-processing factor 40 homolog A	Q9R1C7	-0.24097	-0.0415866	-0.19603	-0.159529	0.0603813	0.0591796
Bsg	Basigin (Fragment)	O55107	-0.382884	-0.0984899	-0.18545	-0.222275	0.0841369	0.0591872
Pogz	Pogo transposable element with ZNF domain	Q0VGT3	0.152467	0.170331	0.0290933	0.117297	0.0444023	0.0591923
Phip	PH-interacting protein	Q8VDD9	-0.412219	-0.0703031	-0.35823	-0.280251	0.106124	0.0592262
Spc25	Kinetochore protein Spc25	Q3UA16	0.421461	0.0742826	0.320489	0.272077	0.103103	0.0592968
Prpsap2	Prpsap2 protein	Q05BD4	0.290391		0.198228	0.244309	0.0460814	0.0593421
Msto1	Protein misato homolog 1	Q2YDW2	0.0384361	0.0252542	0.0883542	0.0506815	0.0192169	0.059354
Nub1	NEDD8 ultimate buster 1	P54729	0.258508	0.253601	0.0448631	0.185657	0.0704114	0.0593761
Lpp	Lipoma-preferred partner homolog	Q8BFW7	0.0434451	0.135089	0.0522818	0.0769386	0.0291868	0.0594015
Nat10	N-acetyltransferase 10	Q8K224	-0.405114	-0.10467	-0.193861	-0.234548	0.0890846	0.0595213
Setd6	N-lysine methyltransferase SETD6	Q9CWY3	-0.116475	-0.654875	-0.479812	-0.417054	0.158559	0.0596184
Otud3	MCG9090, isoform CRA_a	B1AZ99	0.390519	0.265942		0.328231	0.0622886	0.059696
Mapk11	Putative uncharacterized protein	Q3TT60	1.81652		2.6677	2.24211	0.425589	0.05971
Aspscr1	Tether containing UBX domain for GLUT4	Q8VBT9	0.237742	0.0511698	0.135998	0.141637	0.0539326	0.0597725
Mtr	Methionine synthase	A6H5Y3	-1.40028	-0.410869	-0.58805	-0.799731	0.304597	0.0597968
Apbb2	Amyloid beta A4 precursor protein-binding family B member 2	Q3TIZ5	-0.212289	-0.915916	-0.485003	-0.537736	0.204824	0.0598035
U2af2	Splicing factor U2AF 65 kDa subunit	P26369	-0.0448045	-0.182325	-0.0909612	-0.10603	0.0404074	0.0598538
Mpdz	Multiple PDZ domain protein	Q8VBX6	0.237666	0.0515352	0.134385	0.141195	0.0538391	0.0599099
Uqcrc1	Putative uncharacterized protein	Q3TIC8	-0.18482	-0.0317933	-0.141792	-0.119468	0.0455634	0.0599293
Tm9sf2	Transmembrane 9 superfamily member 2	P58021	-0.373909	-0.422995	-0.0700868	-0.288997	0.110369	0.060064
Tmem50a	Transmembrane protein 50A	Q52KP1	0.21379	0.950138	0.513774	0.559234	0.213777	0.0601593
Smad1	Mothers against decapentaplegic homolog 1	P70340	0.234089		0.158884	0.196487	0.0376024	0.0601884
Kctd12	MKIAA1778 protein (Fragment)	Q69ZA6	-0.496271	-1.33087	-0.436248	-0.754462	0.288723	0.0602684
Pdcd2l	Programmed cell death protein 2-like	Q8C5N5	-0.26841	-0.39575		-0.33208	0.0636701	0.0602982
Dhx37	DEAH (Asp-Glu-Ala-His) box polypeptide 37	Q6NZL1	-0.356128	-0.0707944	-0.42886	-0.285261	0.109269	0.060363
Cers6	Ceramide synthase 6	Q8C172	-0.109323		-0.0740241	-0.0916733	0.0176492	0.0605412
Crk	V-crk sarcoma virus CT10 oncogene homolog (Avian), isoform CRA_a	Q5ND51	0.0315892	0.18853	0.146173	0.122097	0.046877	0.0605923
Gnl2	Testicular antigen (Fragment)	P70410	-0.648533	-0.176307	-0.287547	-0.370796	0.142533	0.0607141
Gstp1	Glutathione S-transferase P 1	P19157	0.0338173	0.201198	0.153268	0.129428	0.0497674	0.0607453
Dctn4	Putative uncharacterized protein	Q3TQY2	0.329864	0.143341	0.0914522	0.188219	0.0723893	0.060767
Golgb1	Protein Golgb1	E9PVZ8	0.0399951	0.247532	0.216922	0.16815	0.0646837	0.0607874
Ralb	Putative uncharacterized protein	Q8CCG5	0.437493	0.123964	0.185942	0.249133	0.0958643	0.0608167
Slmap	Sarcolemmal membrane-associated protein	Q3URD3	0.111007	0.0481066	0.211726	0.123613	0.0476516	0.0609986
Htra1	Serine protease HTRA1	Q9R118	-2.01157	-0.322242	-1.77524	-1.36968	0.528146	0.0610267
Ass1	Argininosuccinate synthase	P16460	0.0810713	0.354453	0.184378	0.206634	0.079699	0.061054
Cbx5	Chromobox protein homolog 5	Q61686	0.319386	0.0755685	0.442438	0.279131	0.107802	0.0611854
Krt19	Keratin, type I cytoskeletal 19	P19001	-0.378815	-0.255267		-0.317041	0.0617744	0.0612541
Zzef1	Zinc finger ZZ-type and EF-hand domain-containing protein 1	Q5SSH7	0.261033	0.258102	0.0422195	0.187118	0.0724543	0.0614483
Leprel1	Prolyl 3-hydroxylase 2	Q8CG71	-0.113537	-0.1469	-0.375033	-0.211823	0.0821713	0.0616345
Mll	Histone-lysine N-methyltransferase MLL	P55200	-0.927829	-0.449455	-0.224692	-0.533992	0.207333	0.0617247
Ndfip2	NEDD4 family-interacting protein 2	Q3V1V0	-0.269068	-0.19052	-0.0457437	-0.168444	0.0654062	0.061732
Slc25a28	Mitoferrin-2	Q8R0Z5	-0.384848		-0.258486	-0.321667	0.0631809	0.0617357
Pus7	Putative uncharacterized protein	Q3ULP8	-0.211757	-0.262403	-0.0415581	-0.171906	0.0667937	0.0617976
Rcn1	Reticulocalbin-1	Q05186	0.385213	0.092359	0.187814	0.221795	0.0862302	0.061859
Tmem2	Transmembrane protein 2	Q5FWI3	0.224351	0.902984	0.424755	0.517363	0.201303	0.0619404
Slc25a4	ADP/ATP translocase 1	P48962	-0.395196	-0.599374	-0.10689	-0.367153	0.142857	0.0619408
Vps8	Vacuolar protein sorting-associated protein 8 homolog	Q0P5W1	-1.01693	-1.32544	-0.213177	-0.851849	0.331522	0.0619629
Peo1	Twinkle protein, mitochondrial	Q8CIW5	-0.10219	-0.352766	-0.143173	-0.199377	0.0776021	0.0619746
Set	SET translocation	Q3T9S3	-0.494702	-0.154881	-0.18597	-0.278518	0.108464	0.0620292
Agap1	Arf-GAP with GTPase, ANK repeat and PH domain-containing protein 1	Q8BXK8	-0.301235		-0.449438	-0.375337	0.0741019	0.0620453
Cpe	Carboxypeptidase E	Q00493	-0.0772503	-0.116498	-0.0206125	-0.0714536	0.0278311	0.0620464
Tnpo2	Putative uncharacterized protein	Q3U1S0	0.35967	0.240826		0.300248	0.0594223	0.0621933
Cbx7	Chromobox protein homolog 7	Q8VDS3	0.490773		0.733328	0.61205	0.121278	0.0622665
Timm9	Mitochondrial import inner membrane translocase subunit Tim9	Q9WV98	0.0209177	0.123571	0.136552	0.0936804	0.0365738	0.0622853
Pnp	Purine nucleoside phosphorylase	P23492	0.104283	0.206487	0.047205	0.119325	0.0465917	0.0622984
Slc39a6	Zinc transporter ZIP6	Q8C145	-0.278477	-1.01685	-0.430652	-0.575325	0.225089	0.062502
Zfp207	Protein Zfp207	Q99LA2	-0.472981	-0.0985913	-0.259334	-0.276969	0.108436	0.0625733
Atp13a3	Probable cation-transporting ATPase 13A3	Q5XF89	-0.92232		-0.615207	-0.768763	0.153556	0.0627548
Uba3	Uba3 protein (Fragment)	Q66JT6	-0.103474	-0.016972	-0.112878	-0.0777749	0.0305224	0.0628186
Pyroxd1	Pyridine nucleotide-disulfide oxidoreductase domain-containing protein 1	Q3TMV7	-1.30595	-0.571974	-0.342535	-0.740155	0.29055	0.0628469
Hspa9	Stress-70 protein, mitochondrial	P38647	-0.382669	-0.0848779	-0.196019	-0.221188	0.0868811	0.0629096
Tln1	Talin-1	P26039	0.189634	0.0283486	0.171884	0.129956	0.0510612	0.0629413
Myd88	Myeloid differentiation primary response protein MyD88	P22366	-0.210362	-0.0576707	-0.327233	-0.198422	0.0780446	0.0630498
Gcfc2	GC-rich sequence DNA-binding factor 2	Q8BKT3	1.22471	0.896756	0.194813	0.772092	0.303769	0.0630785
Sh3bgrl	SH3 domain-binding glutamic acid-rich-like protein	Q3U9A8	0.188097	0.0371349	0.107265	0.110832	0.0436154	0.0631024
Tpi1	Triosephosphate isomerase	P17751	0.245637	0.0684819	0.100964	0.138361	0.0544514	0.0631074
Kdelc2	Putative uncharacterized protein (Fragment)	Q8C6F3	0.093962	0.299681	0.109919	0.167854	0.0660741	0.0631323
Appl1	DCC-interacting protein 13-alpha	Q8K3H0	0.481569	0.103338	0.252343	0.279083	0.110002	0.0632668
Mrps26	28S ribosomal protein S26, mitochondrial	Q80ZS3	-0.248258	-0.631383	-0.183475	-0.354372	0.139762	0.0633301
Hgsnat	Heparan-alpha-glucosaminide N-acetyltransferase	Q3UDW8	0.218307	0.539753	0.151817	0.303292	0.119778	0.06347
Polr2j	DNA-directed RNA polymerase II subunit RPB11	O08740	-0.621456		-0.936783	-0.77912	0.157664	0.0635553
Ogfr	Putative uncharacterized protein	Q3UF10	0.158418	0.0375743	0.229825	0.141939	0.0561062	0.0635641
Cenph	Centromere protein H	Q9QYM8	0.467248	1.18415	0.341011	0.664137	0.262549	0.0635745
Ufsp2	Ufm1-specific protease 2	Q99K23	-0.713044	-0.711638	-0.106805	-0.510496	0.201846	0.0635923
Usp5	Ubiquitin carboxyl-terminal hydrolase 5	P56399	0.0269923	0.09814	0.0404276	0.0551866	0.0218241	0.0636102
Ppp1r10	Putative uncharacterized protein (Fragment)	Q3ULI5	-0.17872	-0.0660602	-0.326271	-0.19035	0.0753412	0.0637004
Mxra8	Matrix-remodeling-associated protein 8	Q9DBV4	0.237944		0.359263	0.298603	0.0606596	0.0637947
Tefm	Transcription elongation factor, mitochondrial	Q5SSK3	0.576234	0.0833642	0.525693	0.395097	0.156548	0.0638118
Mphosph10	U3 small nucleolar ribonucleoprotein protein MPP10	Q810V0	-0.0641733	-0.359951	-0.221923	-0.215349	0.0854469	0.0639583
Yme1l1	ATP-dependent zinc metalloprotease YME1L1	O88967	-0.067387	-0.0987775	-0.243273	-0.136479	0.0541604	0.0639734
Mef2d	Putative uncharacterized protein	Q3URR2	0.333655		0.220701	0.277178	0.0564769	0.0639819
Krt80	Keratin, type II cytoskeletal 80	Q0VBK2		-0.458704	-0.693777	-0.576241	0.117536	0.0640475
Mapre2	Microtubule-associated protein RP/EB family member 2	Q8R001	0.128861	0.0851807		0.107021	0.0218401	0.0640787
Nfx1	Transcriptional repressor NF-X1	B1AY10	0.290152	0.219084	0.752329	0.420521	0.167167	0.0641532
Sf3b4	Splicing factor 3B subunit 4	Q8QZY9	-0.229807	-0.244387	-0.0350361	-0.169743	0.067485	0.0641656
Usf1	USF1 protein	O09135	-0.288937		-0.190848	-0.239893	0.0490445	0.0641918
Tnrc6b	Trinucleotide repeat-containing gene 6B protein	Q8BKI2	0.120594	0.765514	0.538556	0.474888	0.188874	0.064206
Ppan	Suppressor of SWI4 1 homolog	Q91YU8	-0.454582	-0.084551	-0.265919	-0.268351	0.106826	0.0643005
Phpt1	14 kDa phosphohistidine phosphatase	Q9DAK9	0.0500951	0.343622	0.345907	0.246541	0.0982252	0.0643875
Haus4	HAUS augmin-like complex subunit 4	Q8BFT2	0.155924	0.0347658	0.0766788	0.0891228	0.0355244	0.0644369
Gm20425	Protein Gm20425	E9Q035	-1.20681		-0.795103	-1.00096	0.205854	0.0645624
Prmt7	Protein arginine N-methyltransferase 7	Q922X9	-0.282127	-0.392284	-0.059882	-0.244764	0.0977578	0.0646465
Cep76	Centrosomal protein of 76 kDa	Q0VEJ0	-0.266514	-0.411648	-0.997326	-0.558496	0.223379	0.0647968
Ube4a	MKIAA0126 protein (Fragment)	Q6A0C5	0.292388	0.831291	1.50668	0.876785	0.351273	0.0649739
Pum1	Putative uncharacterized protein	Q3TQ21	-0.0825822	-0.470096	-0.284596	-0.279092	0.111899	0.0650544
Tpr	Nuclear pore complex-associated intranuclear coiled-coil protein TPR	Q7M739	-0.306481	-0.0999823	-0.103706	-0.170056	0.0682207	0.0651133
Gan	Gigaxonin	Q8CA72	-0.522582	-0.255061	-1.10963	-0.629092	0.252377	0.0651162
Tpd52l2	Tumor protein D52-like 2, isoform CRA_c	Q3TAI4	0.0895461	0.403931	0.195198	0.229559	0.092367	0.0654309
Atxn10	Ataxin-10	P28658	-0.0261625	-0.181997	-0.136908	-0.115022	0.0462973	0.0654676
Arhgef2	Rho guanine nucleotide exchange factor 2	Q60875	0.0495838	0.0798845	0.191215	0.106894	0.043058	0.0655474
Prune2	Protein prune homolog 2	Q52KR3	0.990868	0.450497	0.233465	0.558277	0.225187	0.0656932
Acaa1a	Putative uncharacterized protein	Q3UPU8	0.516028	0.0958725	0.29044	0.30078	0.121399	0.0657599
Rock1	Rho-associated protein kinase 1	P70335	-0.124098	-0.0166025	-0.10969	-0.0834635	0.0336882	0.0657639
Sbf1	Myotubularin-related protein 5	Q6ZPE2	0.0617117	0.0375008	0.146585	0.0819324	0.033073	0.065773
Idh3b	Isocitrate dehydrogenase 3 (NAD+) beta	Q91VA7	-0.0599428	-0.0427833	-0.153884	-0.0855368	0.0345308	0.0657819
Actr1a	Alpha-centractin	P61164	0.220023	0.0800649	0.065662	0.121917	0.049229	0.0658075
Wdr3	WD repeat-containing protein 3	Q8BHB4	-0.266564	-0.0391947	-0.189047	-0.164935	0.0667339	0.0660228
Tcerg1	MCG127945, isoform CRA_a	Q3TH57	-0.14448	-0.0448808	-0.25024	-0.146534	0.0592911	0.0660274
Sart1	U4/U6.U5 tri-snRNP-associated protein 1	Q9Z315	0.128605	0.151511	0.0200528	0.100056	0.0405446	0.0661845
Dcun1d3	DCN1-like protein 3	Q8K0V2		0.102844	0.0669353	0.0848897	0.0179544	0.0663457
Lztr1	Putative uncharacterized protein	Q3V0X6	0.0943344		0.061365	0.0778497	0.0164847	0.0664211
Cct7	T-complex protein 1 subunit eta	P80313	-0.215956	-0.0284267	-0.177832	-0.140738	0.0572241	0.0665502
Rrm2	Ribonucleoside-diphosphate reductase subunit M2	P11157	0.527284	0.0703294	0.419918	0.339177	0.137951	0.0665827
Scrib	Protein scribble homolog	Q80U72	0.266247	0.0517349	0.366291	0.228091	0.0927869	0.0666029
Fh	Fumarate hydratase, mitochondrial	P97807	0.219934	0.157318	0.0313866	0.136213	0.0554425	0.0666639
Pdxdc1	Pyridoxal-dependent decarboxylase domain-containing protein 1	Q99K01	0.428031	0.0581119	0.44794	0.311361	0.126755	0.0666828
Arl1	ADP-ribosylation factor-like protein 1	P61211	0.084828	0.220356	0.0607895	0.121991	0.0496695	0.066698
Ndufc2	NADH dehydrogenase [ubiquinone] 1 subunit C2	Q9CQ54	0.22155	0.305959	0.0431567	0.190222	0.0774646	0.0667182
Wdr75	Putative uncharacterized protein (Fragment)	Q3TQZ0	-0.412385	-0.0650502	-0.262639	-0.246691	0.100583	0.0668498
Pdcl	Putative uncharacterized protein	Q3UZN6	-0.586868	-0.407407	-0.0852232	-0.359833	0.146753	0.0668782
Pttg1	Securin	Q9CQJ7	2.18283	0.724625	0.69927	1.20224	0.490349	0.066885
Anxa1	Annexin A1	P10107	0.0280886	0.0848861	0.153381	0.0887854	0.0362214	0.0669125
Ipo9	Importin 9	Q4G0B8	0.0351337	0.0322727	0.10333	0.056912	0.0232235	0.0669374
Prkag1	5'-AMP-activated protein kinase subunit gamma-1	O54950	-0.512693	-0.0935709	-0.284366	-0.296877	0.121152	0.0669447
Slbp	Histone RNA hairpin-binding protein	P97440	0.458069	0.156814	0.841928	0.485604	0.198254	0.0669913
Add1	Adducin 1 (Alpha)	Q8K232	0.0886256	0.451939	0.234876	0.25848	0.105542	0.0670053
Ptrh2	Peptidyl-tRNA hydrolase 2, mitochondrial	Q8R2Y8	0.248345	0.128888	0.0486553	0.141963	0.0580149	0.0670974
Zc3h11a	Zinc finger CCCH type containing 11A	Q3UL31	-0.339526	-0.129577	-0.0935552	-0.187553	0.076695	0.0671668
Kdm8	Lysine-specific demethylase 8	Q9CXT6	-0.747403	-0.164895	-0.348814	-0.420371	0.17192	0.0671791
Wtap	Pre-mRNA-splicing regulator WTAP	Q9ER69	-0.378646	-0.0750381	-0.194137	-0.21594	0.0883194	0.0671865
Kif1b	Kinesin-like protein KIF1B	Q60575	3.02401	0.425165	3.38544	2.2782	0.932376	0.0672554
Hsd17b10	17beta-hydroxysteroid dehydrogenase type 10/short chain L-3-hydroxyacyl-CoA dehydrogenase	Q99N15	0.0225332	0.132388	0.171057	0.108659	0.0444864	0.0672957
Rrp8	Putative uncharacterized protein	Q3U4B0	-0.343239	-0.74218	-0.164878	-0.416765	0.170659	0.0673156
Rabl5	Rab-like protein 5	Q9DAI2	0.617775	0.0849591	0.678614	0.46045	0.188565	0.0673256
Gxylt1	Glucoside xylosyltransferase 1	Q3UHH8	0.194214	0.830609	0.366795	0.463873	0.190015	0.0673534
Incenp	Inner centromere protein	Q9WU62	0.195735	0.562442	0.169168	0.309115	0.126895	0.067588
Ubr2	Putative uncharacterized protein	Q3UHE0	-0.0797042	-0.164911	-0.03458	-0.0930651	0.0382119	0.0676093
Txlna	Taxilin alpha, isoform CRA_a	Q3UD58	-0.105927	-0.03044	-0.181514	-0.105961	0.0436114	0.0678721
Nop14	Nucleolar protein 14	Q8R3N1	-0.0548961	-0.14007	-0.277655	-0.15754	0.0648956	0.0679646
Ubap1	Putative uncharacterized protein	Q3TQY7	-0.775389	-0.189084	-0.325505	-0.429993	0.177132	0.0679676
Epg5	Ectopic P granules protein 5 homolog	Q80TA9	1.15019	0.55654	0.237882	0.648203	0.267318	0.0680891
Cog1	MKIAA1381 protein (Fragment)	Q5DTY3	0.677545	1.24696	0.224935	0.71648	0.295675	0.0681632
Timm21	RIKEN cDNA 1700034H14, isoform CRA_c	Q3THX0	-0.318234	-0.365283	-0.0441434	-0.242553	0.10013	0.0682007
Urgcp	Up-regulator of cell proliferation	Q5NCI0	-0.213973	-0.472126	-0.104777	-0.263625	0.108912	0.0682841
Arhgap11a	Rho GTPase-activating protein 11A	Q80Y19	0.771555	0.140394	0.414732	0.442227	0.182719	0.0682965
Snx7	MCG10440	Q5M8N3	0.144693	0.205431	0.0279611	0.126028	0.0520741	0.0683007
Nans	N-acetylneuraminic acid synthase (Sialic acid synthase)	Q99J77	0.141461	0.0849371	0.022633	0.0830103	0.0343161	0.0683544
Foxc1	Forkhead box protein C1	Q61572		-0.856546	-0.549732	-0.703139	0.153407	0.0683756
Clip1	CAP-Gly domain-containing linker protein 1 (Fragment)	F7CB97	-0.0806381	-0.146009	-0.341327	-0.189325	0.0783089	0.0684146
Brwd1	Bromodomain and WD repeat-containing protein 1	Q921C3	0.211853	1.29129	0.756913	0.753352	0.311612	0.0684176
Rpl7a	60S ribosomal protein L7a	P12970	-0.17309	-0.0583522	-0.322289	-0.184577	0.0764082	0.0685053
Ddt	D-dopachrome decarboxylase	O35215	0.245682	0.383202		0.314442	0.0687601	0.0685271
Pex1	Peroxisome biogenesis factor 1	Q5BL07	0.0621808	0.301151	0.144091	0.169141	0.0701127	0.068654
Kctd10	BTB/POZ domain-containing adapter for CUL3-mediated RhoA degradation protein 3	Q922M3	-0.401086	-0.0646789	-0.23684	-0.234201	0.0971212	0.068699
Gripap1	Putative uncharacterized protein (Fragment)	Q3TZ55	0.167131	0.136462	0.473551	0.259048	0.107616	0.0688957
Cyp51a1	Lanosterol 14-alpha demethylase	Q8K0C4	-0.329549	-0.0642767	-0.164436	-0.186087	0.0773388	0.0689424
Aqr	Intron-binding protein aquarius	Q8CFQ3	-0.145613	-0.0225457	-0.0881195	-0.085426	0.0355519	0.0690934
Stub1	STIP1 homology and U box-containing protein 1	Q9WUD1	0.020503	0.092785	0.143092	0.0854599	0.0355773	0.0691286
Znf511	Zinc finger protein 511	Q6P0X2	1.64341	0.213367	1.84757	1.23478	0.514097	0.0691397
Arvcf	Armadillo repeat protein deleted in velo-cardio-facial syndrome homolog	P98203	0.493314	0.0569715	0.465956	0.338747	0.141109	0.0691971
Bend3	BEN domain-containing protein 3	Q6PAL0	-0.252719	-0.0674398	-0.427429	-0.249196	0.103935	0.0693355
Eif3c	Eukaryotic translation initiation factor 3 subunit C	Q8R1B4	-0.0291731	-0.174748	-0.0984381	-0.100786	0.0420403	0.0693465
Asxl1	Putative Polycomb group protein ASXL1	P59598	-0.384709		-0.603477	-0.494093	0.109384	0.06935
Taf7	Putative uncharacterized protein	Q8BPH4	0.156699	0.874077	0.463202	0.497992	0.207819	0.0693973
Coq7	Ubiquinone biosynthesis protein COQ7 homolog	P97478	-0.901918	-0.305469	-0.26789	-0.491759	0.205366	0.069478
Fblim1	Filamin-binding LIM protein 1	Q71FD7	0.49981	1.23054	2.52916	1.41984	0.59342	0.0695671
Fosl1	Fos-related antigen 1	P48755	-0.16121	-0.214213	-0.025989	-0.133804	0.0560368	0.0697932
Thoc7	THO complex subunit 7 homolog	Q7TMY4	-0.216009	-0.0296161	-0.142733	-0.129453	0.0542152	0.0697947
Mcts2	Malignant T-cell-amplified sequence 2	Q9CQ21	-0.702282		-0.446037	-0.57416	0.128122	0.0698851
Tuba1b	Tubulin alpha-1B chain	P05213	0.0691901	0.0439406		0.0565654	0.0126248	0.0698976
Yeats4	YEATS domain-containing protein 4	Q9CR11	-0.225553	-0.027245	-0.169692	-0.14083	0.0590376	0.0699037
Dnaja3	DnaJ (Hsp40) homolog, subfamily A, member 3, isoform CRA_b	Q3TJA9	0.112835	0.154761	0.419658	0.229085	0.0960522	0.0699238
Med15	Putative uncharacterized protein	Q3TE00	-0.75629	-0.392777	-0.136649	-0.428572	0.179768	0.0699695
Slc29a2	Equilibrative nucleoside transporter 2	Q61672	-0.559301		-0.881753	-0.720527	0.161226	0.0700713
Wac	WW domain-containing adapter protein with coiled-coil	Q924H7	-0.955145	-0.147732	-0.562189	-0.555022	0.233107	0.0701132
Tsr2	Pre-rRNA-processing protein TSR2 homolog	Q8C8T8	0.368065	0.837322	0.183658	0.463015	0.194577	0.070178
Ctsl1	Cathepsin L1	P06797	-0.300182	-0.0578012	-0.14682	-0.168268	0.0707863	0.0702949
Ctnnbl1	Putative uncharacterized protein	Q3UJX2	0.0228948	0.207642	0.176948	0.135828	0.0571578	0.07033
Fam120b	Constitutive coactivator of peroxisome proliferator-activated receptor gamma	Q6RI63		0.15125	0.0957359	0.123493	0.0277568	0.0703754
Tufm	Elongation factor Tu, mitochondrial	Q8BFR5	-0.346132	-0.0461016	-0.230135	-0.207456	0.0873504	0.0703957
Tbc1d24	TBC1 domain family member 24	Q3UUG6	0.301772		0.190793	0.246282	0.0554898	0.0705403
Pdcd7	Programmed cell death protein 7	Q3U2X6	-0.365664	-0.231125		-0.298394	0.0672699	0.0705797
Mrpl22	39S ribosomal protein L22, mitochondrial	Q8BU88	-0.38395	-0.0597481	-0.222014	-0.221904	0.093589	0.0705826
Cep68	Centrosomal protein of 68 kDa	Q3TRP8	0.962026	3.30698	1.11482	1.79461	0.757472	0.07067
Mgrn1	E3 ubiquitin-protein ligase MGRN1	Q9D074	0.203218	0.751682	0.271562	0.408821	0.172562	0.0706743
Tm9sf1	Transmembrane 9 superfamily member 1	Q9DBU0	0.421116	1.63701	0.618819	0.892316	0.376697	0.07069
Smg9	Protein SMG9	Q9DB90	0.239784	0.965518	0.376264	0.527189	0.222678	0.0707517
Dlst	Dihydrolipoyllysine-residue succinyltransferase component of 2-oxoglutarate dehydrogenase complex, mitochondrial	Q9D2G2	-0.399508	-0.376468	-0.0427366	-0.272904	0.115276	0.0707562
Snrpd3	Small nuclear ribonucleoprotein Sm D3	P62320	-0.455464	-0.995714	-0.205214	-0.552131	0.23326	0.0707746
Anxa5	Annexin A5	P48036	0.0902708	0.162631	0.0264067	0.093103	0.0393502	0.0708226
Timm8a1	Mitochondrial import inner membrane translocase subunit Tim8 A	Q9WVA2	-0.265728	-0.0295222	-0.212424	-0.169225	0.071526	0.070827
Scrn2	Secernin-2	Q8VCA8	0.17768	0.193863	0.595998	0.322513	0.136822	0.0712461
Mrps14	28S ribosomal protein S14, mitochondrial	Q9CR88	-0.238031	-0.0642485	-0.0850757	-0.129119	0.0547873	0.071268
Tut1	Speckle targeted PIP5K1A-regulated poly(A) polymerase	Q8R3F9	-0.26985	-0.0361505	-0.335479	-0.213827	0.0908358	0.0713997
Pacsin3	Protein kinase C and casein kinase substrate in neurons 3, isoform CRA_a	Q543N7	0.031579	0.305496	0.286526	0.207867	0.088314	0.0714124
Slfn9	Putative uncharacterized protein	Q8CB82	0.493444	0.0642219	0.323545	0.293737	0.124799	0.0714146
Fip1l1	Pre-mRNA 3'-end-processing factor FIP1	Q9D824	-0.134418	-0.330283	-0.0767968	-0.180499	0.0767168	0.0714573
Dap3	28S ribosomal protein S29, mitochondrial	Q9ER88	-0.344335	-0.611281	-0.0951262	-0.350247	0.14903	0.0715843
Hsd17b8	Estradiol 17-beta-dehydrogenase 8	P50171	0.428624	4.19066	3.85567	2.82499	1.20208	0.0715886
Ints9	Integrator complex subunit 9	Q8K114	-0.0655247	-0.328603	-0.151703	-0.181943	0.0774346	0.0716104
Pip4k2c	Phosphatidylinositol 5-phosphate 4-kinase type-2 gamma	Q91XU3	0.475817	0.366154	0.0522135	0.298062	0.126935	0.0716829
Pfdn4	Protein Pfdn4	Q3UWL8	0.257803	0.111937	0.0550334	0.141591	0.0603831	0.0718416
Dars	Putative uncharacterized protein	Q3TF87	-0.0239871	-0.0363544	-0.096009	-0.0521168	0.0222346	0.0718867
Tubgcp2	Putative uncharacterized protein	Q3TIB7	0.248098	0.425403	0.0627173	0.245406	0.104707	0.0718971
Lamb1	Laminin subunit beta-1	P02469	-0.252706	-0.681855	-0.174227	-0.369596	0.157765	0.0719474
Hmgn5	High mobility group nucleosome-binding domain-containing protein 5	Q9JL35	0.205988		0.32916	0.267574	0.0615856	0.072009
Ercc2	TFIIH basal transcription factor complex helicase XPD subunit	O08811	-0.243431	-0.0395751	-0.34153	-0.208179	0.0889311	0.0720359
	UPF0183 protein C16orf70 homolog	Q922R1	0.358085	0.223877		0.290981	0.067104	0.0721451
Dcaf8	DDB1- and CUL4-associated factor 8	Q8N7N5	0.236128	0.0880884	0.483561	0.269259	0.115359	0.0723691
Timp2	Metalloproteinase inhibitor 2	P25785	-0.319174	-0.0473595	-0.430866	-0.2658	0.11388	0.0723723
Igbp1	Immunoglobulin-binding protein 1	Q61249	0.586141	0.437564	0.0634985	0.362401	0.155484	0.0725322
Trim47	Trim47 protein (Fragment)	Q497Z1	0.207537	0.338888	0.0458139	0.197413	0.0847546	0.0726094
Cdk19	Putative uncharacterized protein	Q8BKC7	0.166276		0.103611	0.134944	0.0313326	0.0726215
Cttnbp2nl	CTTNBP2 N-terminal-like protein	Q99LJ0	0.0871843	0.155259	0.0233839	0.088609	0.0380756	0.0727106
Ciao1	Probable cytosolic iron-sulfur protein assembly protein CIAO1	Q99KN2	0.271407	0.0268727	0.275192	0.191157	0.0821495	0.0727225
Shroom3	Protein Shroom3	Q9QXN0	0.063641	0.102219		0.08293	0.0192891	0.0727437
Ap4m1	Putative uncharacterized protein	Q8CD17	0.114744	0.924762	1.14546	0.728322	0.313334	0.0728474
Cox5b	Cytochrome c oxidase subunit 5B, mitochondrial	P19536	0.0132006	0.135048	0.136388	0.0948791	0.040841	0.0729117
Ankfy1	Ankyrin repeat and FYVE domain-containing protein 1	Q810B6	0.264935	0.160684	0.0358414	0.15382	0.0662226	0.0729295
Smg8	Protein SMG8	Q8VE18	0.420359	0.249676	0.0583763	0.242804	0.104552	0.0729516
Nagk	N-acetylglucosamine kinase, isoform CRA_c	Q3U2G9	-2.70485	-4.35092		-3.52788	0.823037	0.0729552
Adss	Adenylosuccinate synthetase isozyme 2	P46664	-0.163509	-0.0486444	-0.305713	-0.172622	0.0743491	0.0729789
Klf5	Krueppel-like factor 5	Q9Z0Z7	-0.0975583	-0.167108	-0.421827	-0.228831	0.0985646	0.072986
Usp3	Ubiquitin carboxyl-terminal hydrolase 3	Q91W36	-0.34905		-0.562501	-0.455776	0.106726	0.073217
Itgb3bp	Centromere protein R	Q9CQ82	1.82123	1.13008		1.47566	0.345573	0.0732232
Cmtm4	CKLF-like MARVEL transmembrane domain-containing protein 4	Q8CJ61	0.320137		0.516187	0.418162	0.0980252	0.0732945
Exosc10	Exosome component 10	P56960	0.279006	0.0436708	0.395387	0.239355	0.103449	0.0733805
Fam118b	Protein FAM118B	Q8C569	0.0352201	0.180086	0.081283	0.0988631	0.042733	0.0733923
Ccdc12	Coiled-coil domain-containing protein 12	Q8R344	0.113103	0.169454	0.0199544	0.100837	0.0435903	0.0734031
Mipep	Putative uncharacterized protein	Q8BLL4	-1.58567	-0.266942	-0.795678	-0.882763	0.383165	0.0738778
Becn1	Beclin-1	O88597	0.168523	0.537061	0.157022	0.287535	0.124807	0.0738795
Osgep	Putative uncharacterized protein	Q3UQ67	0.271115	0.136408	0.0454173	0.15098	0.0655595	0.0739244
Uap1l1	UDP-N-acetylhexosamine pyrophosphorylase-like protein 1	Q3TW96	0.384631	0.105921	0.12756	0.206037	0.0895151	0.0739875
Fbxo22	F-box only protein 22	Q78JE5	-0.477376	-0.768398	-0.0964936	-0.447422	0.194539	0.0740788
Zmat5	Zinc finger matrin-type protein 5	Q9CQR5		-1.05953	-0.653238	-0.856383	0.203146	0.0741371
Tenc1	Tensin-like C1 domain-containing phosphatase	Q8CGB6	0.647387	0.397105	0.081929	0.375474	0.163592	0.074319
Fmr1	Fragile X mental retardation protein 1 homolog	P35922	-0.126915	-0.0112268	-0.111365	-0.0831689	0.0362501	0.074364
Gnpda1	Glucosamine-6-phosphate isomerase 1	O88958	0.212389	0.8525	0.307487	0.457458	0.199419	0.0743821
Rara	Retinoic acid receptor alpha	P11416	0.579786	0.356576		0.468181	0.111605	0.0744885
Styx	Putative uncharacterized protein	Q3U4N1	3.79941		6.19807	4.99874	1.19933	0.0749542
Entpd5	Ectonucleoside triphosphate diphosphohydrolase 5	Q3TQC7	1.7386	1.06499		1.40179	0.336807	0.0750571
Tbl1x	F-box-like/WD repeat-containing protein TBL1X	Q9QXE7	-0.091999	-0.239962	-0.0548698	-0.128943	0.0565344	0.0750586
Tbcel	Tubulin-specific chaperone cofactor E-like protein	Q8C5W3	1.12843	0.0949426	1.0775	0.766958	0.336329	0.0750803
Bet1l	BET1-like protein	O35153	0.0506418	0.515438	0.375331	0.313803	0.137657	0.0751201
Ccs	Copper chaperone for superoxide dismutase, isoform CRA_d	Q543K2	1.6254	1.13253	0.167619	0.97518	0.428115	0.0752114
Rad17	RAD17 homolog (S. pombe)	Q3UYY2	-0.922805		-0.564608	-0.743707	0.179098	0.0752226
Hadh	Hydroxyacyl-coenzyme A dehydrogenase, mitochondrial	Q61425	0.0517494	0.249681	0.414506	0.238646	0.104864	0.0753198
Rps4x	40S ribosomal protein S4, X isoform	P62702	-0.257359	-0.0287964	-0.32391	-0.203355	0.0893687	0.0753354
Ddx28	Probable ATP-dependent RNA helicase DDX28	Q9CWT6	-2.42189	-0.734576	-0.710431	-1.28896	0.566504	0.0753439
Tdp2	Putative uncharacterized protein (Fragment)	Q3TIU5	-0.497093	-0.303861		-0.400477	0.0966164	0.0753534
Pold2	DNA polymerase delta subunit 2	O35654	-0.572239	-0.20562	-0.139874	-0.305911	0.13451	0.0753974
Ndrg1	Putative uncharacterized protein	Q3TD08	0.205563	0.179353	0.644678	0.343198	0.15093	0.0754172
Morc3	Microrchidia 3	Q4QQR6	-0.0282127	-0.086511	-0.174299	-0.0963408	0.0424568	0.0756646
Cth	Cystathionine gamma-lyase	Q8VCN5	1.21927	0.998206	0.103259	0.773577	0.34118	0.0757585
Spata5	Spermatogenesis-associated protein 5	Q3UMC0	-0.444055	-0.0473421	-0.295295	-0.262231	0.115708	0.0758133
Tceb2	Transcription elongation factor B polypeptide 2	P62869	-0.0126762	-0.121856	-0.0819629	-0.0721652	0.0318961	0.076013
Timm17b	Putative uncharacterized protein	Q3UBR8	0.111827		0.0680173	0.0899219	0.0219046	0.0760578
Cmtm3	Putative uncharacterized protein	Q3TA49		0.45575	0.277138	0.366444	0.089306	0.0760919
Nek9	MKIAA1995 protein (Fragment)	Q69Z43	0.195326	0.0221536	0.253265	0.156915	0.0694255	0.0761352
Kif16b	Kinesin-like protein KIF16B	B1AVY7	2.08666	0.163186	2.03742	1.42909	0.633111	0.0762907
Ecm29	Proteasome-associated protein ECM29 homolog	Q6PDI5	-0.10876	-0.357506	-0.102317	-0.189528	0.0840098	0.0763559
Commd9	COMM domain-containing protein 9	Q8K2Q0	0.360881	0.59487		0.477876	0.116995	0.0764261
Mtpn	Myotrophin	P62774	0.127232	0.231463	0.590656	0.316451	0.140366	0.0764377
Rnmtl1	RNA methyltransferase-like protein 1	Q5ND52	-0.188153		-0.310464	-0.249308	0.0611555	0.0765698
Mrps15	28S ribosomal protein S15, mitochondrial	Q9DC71	-0.274906	-0.0440494	-0.419419	-0.246125	0.109311	0.0765906
Ech1	Delta(3,5)-Delta(2,4)-dienoyl-CoA isomerase, mitochondrial	O35459	0.518173	0.0959035	0.83971	0.484595	0.215374	0.0766745
Txndc5	Putative uncharacterized protein	Q3TEE8	0.0664514	0.171047	0.0369328	0.0914772	0.0406875	0.0767668
Nab2	NGFI-A-binding protein 2	Q3TYF1	0.151608	0.011833	0.157938	0.107126	0.0476816	0.0768518
Trip10	Cdc42-interacting protein 4	Q8CJ53	-0.164144	-0.0132628	-0.131178	-0.102861	0.0457989	0.0768926
Rmdn1	Regulator of microtubule dynamics protein 1	Q9DCV4	0.866192		0.523204	0.694698	0.171494	0.0770381
Snrpd2	Small nuclear ribonucleoprotein Sm D2	P62317	-0.184297	-0.0260262	-0.0973899	-0.102571	0.0457623	0.0771363
Igf2bp3	Y-box binding protein (Fragment)	Q64369	0.772271		0.465868	0.619069	0.153201	0.0772208
Gid4	Glucose-induced degradation protein 4 homolog	Q9CPY6	1.18374	1.15542	0.0860674	0.80841	0.361264	0.0773334
Hm13	Minor histocompatibility antigen H13	Q9D8V0	0.712225	0.0902153	0.402912	0.401784	0.17956	0.0773398
H2afz	Histone H2A.Z	P0C0S6	-0.197585	-0.0142857	-0.188631	-0.133501	0.0596635	0.0773424
Ptx3	Pentraxin-related protein PTX3	P48759	-0.524897	-0.0775755	-0.787368	-0.46328	0.207203	0.0774331
Zfp275	Protein Zfp275	Q3UQ14	-0.587308		-0.353735	-0.470521	0.116786	0.0774416
Tecr	Gpsn2 protein	Q52L67	0.113715	0.132289	0.421591	0.222532	0.099674	0.0776107
Ccrn4l	Nocturnin	O35710	-0.0329815	-0.268849	-0.153915	-0.151915	0.0680964	0.0777034
Arpp19	cAMP-regulated phosphoprotein 19	P56212	-0.373001	-0.275553	-0.0311784	-0.226577	0.101669	0.0778284
Ccna2	Cyclin-A2	P51943	0.668152	0.0661639	0.437461	0.390593	0.175352	0.0778887
Lypla2	Acyl-protein thioesterase 2	Q9WTL7	0.121378		0.202382	0.16188	0.040502	0.0780384
Fam129b	Niban-like protein 1	Q8R1F1	-0.0505455	-0.0182242	-0.109521	-0.0594303	0.0267269	0.0780996
Scyl2	SCY1-like protein 2	Q8CFE4	-0.215484	-0.129088		-0.172286	0.0431978	0.0781988
Ring1	E3 ubiquitin-protein ligase RING1	O35730	-2.36482	-0.290956	-1.3325	-1.32943	0.598675	0.0782635
Nol12	Nucleolar protein 12	Q8BG17	-0.701284	-0.0794658	-0.416065	-0.398938	0.179708	0.078301
Leprot	Leptin receptor gene-related protein	O89013	1.09599		0.655861	0.875925	0.220064	0.0783492
Ddhd2	Phospholipase DDHD2	Q80Y98	0.0255191	0.255973	0.164326	0.148606	0.0669889	0.078387
Iars2	Isoleucine--tRNA ligase, mitochondrial	Q8BIJ6	-0.0641142	-0.0369812	-0.170933	-0.0906762	0.0408857	0.0784182
Ect2	Protein ECT2	Q07139	0.600101	0.609407	0.0404797	0.416663	0.188111	0.0785727
Mcm2	DNA replication licensing factor MCM2	P97310	0.211714	0.108703	0.0295578	0.116658	0.0527341	0.0787268
Ndufb11	NADH dehydrogenase [ubiquinone] 1 beta subcomplex subunit 11, mitochondrial	O09111	0.110955	0.00742977	0.0958837	0.0714228	0.032291	0.0787458
Sqstm1	Sequestosome-1	Q64337	-0.194842	-0.0269008	-0.100689	-0.107477	0.0485991	0.078765
Cenpt	Centromere protein T	Q3TJM4	-0.800626		-0.477675	-0.63915	0.161476	0.0787698
Hars	Putative uncharacterized protein	Q8C2D1	-0.429059	-0.0279523	-0.387853	-0.281622	0.127391	0.0788104
Psmd10	26S proteasome non-ATPase regulatory subunit 10	Q9Z2X2	0.558685	0.357442	0.0546794	0.323602	0.146474	0.0788883
Thoc6	THO complex subunit 6 homolog	Q5U4D9	-0.574396	-1.28431	-0.217884	-0.692196	0.313434	0.0789353
Wdr91	WD repeat-containing protein 91	Q7TMQ7	0.419186	0.148849	0.0954553	0.221164	0.100204	0.079007
Tmem63a	Transmembrane protein 63A	Q91YT8	0.12738	0.0154701	0.182501	0.10845	0.0491379	0.0790111
Mtor	Serine/threonine-protein kinase mTOR	Q9JLN9	0.00820822	0.129219	0.115373	0.0842665	0.0382386	0.0791979
Ppid	Peptidyl-prolyl cis-trans isomerase D	Q9CR16	-0.566941		-0.337163	-0.452052	0.114889	0.0792211
Rbm25	RNA-binding protein 25	B2RY56	0.408208	0.298768	0.0316012	0.246192	0.11185	0.0793434
Kiaa0754	Uncharacterized protein KIAA0754	Q69ZZ9	1.72769	0.841824	0.255592	0.941701	0.427881	0.0793572
Cbl	E3 ubiquitin-protein ligase CBL	P22682	0.732871	0.171534	0.251867	0.385424	0.175265	0.079455
Khsrp	Far upstream element-binding protein 2	Q3U0V1	-0.0112359	-0.0992738	-0.139846	-0.083452	0.0379601	0.0794931
Rilpl1	RILP-like protein 1	Q9JJC6	0.0278289	0.175354	0.281475	0.161553	0.0735459	0.0795933
Dnaja2	Putative uncharacterized protein	Q3TFF0	-0.243546	-0.0240637	-0.151406	-0.139672	0.0636302	0.0796814
Mrps36	28S ribosomal protein S36, mitochondrial	Q9CQX8	0.925319	0.314395	0.21828	0.485998	0.221406	0.0796816
Rps6	40S ribosomal protein S6	P62754	-0.0437823	-0.0461854	-0.157934	-0.0826339	0.0376564	0.0797174
Tex264	Testis expressed gene 264	Q99LS5	0.047427	0.369043	0.195335	0.203935	0.0929422	0.0797288
Dpm3	Dolichol-phosphate mannosyltransferase subunit 3	Q9D1Q4	0.843644	0.0596337	0.642693	0.515323	0.235114	0.0798643
Fundc2	FUN14 domain-containing protein 2	Q9D6K8	-0.416761	-0.0591386	-0.645106	-0.373669	0.170521	0.0798908
Rap2b	Ras-related protein Rap-2b	P61226	0.21303	0.360026		0.286528	0.0734982	0.0799275
Cstf3	Cleavage stimulation factor subunit 3	Q99LI7	0.0386471	0.356586	0.208157	0.20113	0.0918484	0.0799772
Homer3	Homer protein homolog 3	Q99JP6	0.204911	0.0279743	0.313521	0.182135	0.083213	0.0800348
Tpcn2	Putative uncharacterized protein (Fragment)	Q8BLY6	0.611955	0.0603985	0.376743	0.349699	0.159794	0.0800544
Mrpl15	39S ribosomal protein L15, mitochondrial	Q9CPR5	-0.563745	-1.23682	-0.19722	-0.665928	0.304424	0.0801073
P4ha2	Procollagen-proline, 2-oxoglutarate 4-dioxygenase (Proline 4-hydroxylase), alpha II polypeptide, isoform CRA_f	Q5SX75	0.0121011	0.208172	0.192639	0.137637	0.0629282	0.0801236
Rpl21	60S ribosomal protein L21	O09167	-0.313214	-0.0476783	-0.147195	-0.169362	0.0774506	0.0801519
Cbr2	Carbonyl reductase [NADPH] 2	P08074	1.59922	0.944584		1.2719	0.327317	0.0801757
Utp15	Putative uncharacterized protein	Q3TN42	-0.0542262	-0.193133	-0.0552239	-0.100861	0.046137	0.0801854
Rbm8a	RNA-binding protein 8A	Q9CWZ3	-0.290127	-0.0704571	-0.094902	-0.151829	0.0695082	0.0802873
Med6	Mediator of RNA polymerase II transcription subunit 6	Q921D4	2.16202	1.27579		1.71891	0.443117	0.0803087
Rptor	Regulatory-associated protein of mTOR	Q8K4Q0	-0.0735051	-0.459091	-0.207239	-0.246612	0.113037	0.0804367
Aco2	Aconitate hydratase, mitochondrial	Q99KI0	0.00641625	0.054266	0.029679	0.0301204	0.0138148	0.0805161
Ssrp1	Ssrp1 protein (Fragment)	Q05DR5	-0.366999	-0.202576	-0.0426133	-0.204063	0.093645	0.0805842
Polr2e	MCG13422, isoform CRA_a	Q3V214	-0.0207124	-0.0983032	-0.178207	-0.0990743	0.0454665	0.0805868
Atf6	Atf6 protein (Fragment)	Q811K9	-3.98288	-5.25834	-0.356278	-3.19916	1.46835	0.0806052
Etf1	Putative uncharacterized protein	Q3TDF8	-0.287228	-0.0180725	-0.228586	-0.177962	0.0817175	0.0806605
Ece2	Endothelin-converting enzyme 2	Q80Z60	-0.257378	-0.151483		-0.20443	0.0529471	0.0806691
Apex2	DNA-(apurinic or apyrimidinic site) lyase 2	Q68G58	-0.34433	-0.151806	-0.83749	-0.444542	0.204183	0.0806949
Ankrd13a	Putative uncharacterized protein	Q3U0V3	-0.900678	-0.811148	-0.0502646	-0.587364	0.26979	0.0806982
Ppp1r11	Protein phosphatase 1 regulatory subunit 11	Q8K1L5	0.0273776	0.225811	0.121007	0.124732	0.0573131	0.0807433
Cav1	Caveolin-1	P49817	-0.690063	-0.148869	-0.24703	-0.361987	0.166467	0.0808462
Nucks1	Nuclear ubiquitous casein and cyclin-dependent kinase substrate 1	Q80XU3	-0.29967		-0.176104	-0.237887	0.0617829	0.0808831
Tacc3	Transforming acidic coiled-coil-containing protein 3	Q6NV52	-0.0200822	-0.273895	-0.336667	-0.210215	0.0967779	0.0809832
Ap2a1	AP-2 complex subunit alpha-1	P17426	0.106687	0.0732883	0.00828502	0.0627534	0.0288904	0.0809843
Npm3	Putative uncharacterized protein	Q3TAH3	-0.0494889	-0.189215	-0.374587	-0.20443	0.0941555	0.0810372
Acat1	Putative uncharacterized protein	Q3TQP7	0.0135284	0.206533	0.241297	0.153786	0.0708433	0.0810604
Ythdc2	Probable ATP-dependent RNA helicase YTHDC2	B2RR83	-1.23382	-0.32128	-0.371132	-0.642078	0.296222	0.0812467
Rsbn1	Round spermatid basic protein 1	Q80T69	-0.360957	-0.211554		-0.286255	0.0747017	0.0812545
Pik3r4	Phosphoinositide 3-kinase regulatory subunit 4	Q8VD65	0.507898	0.112734	0.949337	0.523323	0.24163	0.081348
Atp2b1	MCG13663, isoform CRA_a	G5E829	0.0246582	0.116741	0.0420807	0.0611599	0.0282419	0.0813614
Prkx	cAMP-dependent protein kinase catalytic subunit PRKX	Q922R0	0.261802	0.447578		0.35469	0.0928879	0.0815296
Cep55	Centrosomal protein of 55 kDa	Q8BT07	-0.0228008	-0.0976125	-0.186881	-0.102432	0.0474272	0.0816981
Hnrnpd	Heterogeneous nuclear ribonucleoprotein D0	Q60668	-0.333297		-0.194536	-0.263917	0.0693807	0.0818286
Nhp2l1	NHP2-like protein 1	Q9D0T1	-0.808231	-0.0995343	-1.2343	-0.714021	0.330948	0.0818295
Tssc4	Protein TSSC4	Q9JHE7	0.698287	0.308445	0.110557	0.372429	0.172653	0.0818532
Ewsr1	Putative uncharacterized protein	Q3UI30	-0.302197	-0.920842	-0.21453	-0.479189	0.222272	0.0819246
Bmp2k	BMP-2-inducible protein kinase	Q91Z96	0.262969	0.507044	0.0612277	0.27708	0.128889	0.0822828
Ppp1cb	Serine/threonine-protein phosphatase PP1-beta catalytic subunit	P62141	-0.175101	-0.02956	-0.301019	-0.16856	0.0784317	0.0823192
Plcb3	1-phosphatidylinositol 4,5-bisphosphate phosphodiesterase beta-3	P51432	0.513807	0.110752	0.178243	0.267601	0.124635	0.0824405
Unc5b	Putative uncharacterized protein	Q3TYW6	0.717067	0.268178	0.140511	0.375252	0.174836	0.0824851
Efhd2	EF-hand domain-containing protein D2	Q8C845	-0.295183	-0.156134	-0.0341273	-0.161815	0.0754137	0.0825214
Gulp1	PTB domain-containing engulfment adapter protein 1	Q8K2A1	0.056283	0.144744	0.0268551	0.0759608	0.0354254	0.0826069
Nup98	Nuclear pore complex protein Nup98-Nup96	Q6PFD9	-0.205734	-0.0630478	-0.050872	-0.106551	0.0497157	0.082668
Sik3	Serine/threonine-protein kinase SIK3	Q6P4S6	0.573845	0.119744	0.203405	0.298998	0.13953	0.0826862
Ecm1	Extracellular matrix protein 1	Q3TDX7	-0.0586581	-1.31281	-1.26997	-0.880478	0.411096	0.0827524
Myo9b	Unconventional myosin-IXb	E9PWZ6	0.403189	1.05482	0.199313	0.55244	0.257992	0.0827804
Glt8d1	Glycosyltransferase 8 domain-containing protein 1	Q6NSU3	-0.253144	-0.0504291	-0.0928934	-0.132156	0.0617238	0.082794
Atl3	Atlastin-3	Q91YH5	0.182393	0.0084791	0.194366	0.128413	0.0600663	0.0829855
Eef2	Putative uncharacterized protein (Fragment)	Q3TSK4	-0.119357	-0.00549943	-0.126603	-0.0838199	0.0392161	0.0830129
Vwa9	von Willebrand factor A domain-containing protein 9	Q8R3P6	-0.590772	-0.129737	-0.199291	-0.3066	0.143498	0.0830583
Bin1	Bin1 protein	Q6P1B9	-0.00822206	-0.0700864	-0.0363092	-0.0382059	0.0178839	0.0830755
Ppic	Peptidyl-prolyl cis-trans isomerase C	P30412	-0.537273	-0.0773273	-0.24607	-0.28689	0.134334	0.0831167
Dock5	Dedicator of cytokinesis protein 5	B2RY04	0.571293	0.0963859	0.235043	0.300907	0.140994	0.0832034
Epn2	Epsin-2	Q5NCM5	2.40229	0.63837	0.67994	1.2402	0.58117	0.083216
Atg13	Autophagy-related protein 13	Q91YI1	0.0793289	0.626771	0.309797	0.338632	0.158689	0.0832184
Arglu1	Arginine and glutamate-rich protein 1	Q3UL36	-0.0339524	-0.107642	-0.236009	-0.125868	0.0590362	0.0833311
Pmm2	Phosphomannomutase 2	Q545N8	-0.137934	-0.0133546	-0.078834	-0.0767076	0.0359787	0.0833323
Usp42	Ubiquitin carboxyl-terminal hydrolase 42	B2RQC2	-1.08969	-0.3934	-2.52832	-1.33714	0.628595	0.0836219
Rpl32	60S ribosomal protein L32	P62911	-0.654778	-0.0261936	-0.608416	-0.429796	0.202244	0.0837454
Cyb5a	Cytochrome b5	P56395	0.525407	0.0492557	0.30217	0.292277	0.137542	0.0837529
Lias	Lipoyl synthase, mitochondrial	Q8CCZ4	-0.33056		-0.190179	-0.260369	0.0701907	0.0838178
Ddx55	ATP-dependent RNA helicase DDX55	Q6ZPL9	-0.156903	-0.248674	-0.0191677	-0.141582	0.0666942	0.0838828
Phactr4	Phosphatase and actin regulator 4	Q501J7	0.305038	0.421572	0.0241687	0.25026	0.117945	0.0839436
Rab27b	RAB27b, member RAS oncogene family	Q4VA90	1.02454	0.277142	0.280043	0.527241	0.24865	0.0840296
Uchl5	Ubiquitin carboxyl-terminal hydrolase isozyme L5	Q9WUP7	-0.716905	-0.194004	-0.195729	-0.368879	0.174014	0.0840648
Ccdc93	Coiled-coil domain-containing protein 93	Q7TQK5	0.220906	0.0475281	0.0741327	0.114189	0.0539086	0.0841635
Lima1	LIM domain and actin-binding protein 1	Q9ERG0	0.712364	0.0917587	0.339475	0.381199	0.180364	0.0844485
Tardbp	MCG16669, isoform CRA_b	Q544R5	-0.579741	-0.0921864	-0.241396	-0.304441	0.144232	0.0846144
Sf3a3	Splicing factor 3a, subunit 3	Q58E59	-0.252279	-0.0317876	-0.12063	-0.134899	0.064049	0.0848952
Ipo5	Importin-5	Q8BKC5	-0.23895	-0.0196084	-0.142356	-0.133638	0.0634683	0.0849314
Mnf1	Mitochondrial nucleoid factor 1	Q9CQY6	0.278887	0.74603	0.137078	0.387331	0.183962	0.0849369
Gnas	Guanine nucleotide-binding protein G(s) subunit alpha isoforms short	P63094	0.0258214	0.104213	0.0303952	0.0534766	0.0254026	0.0849578
Lrrcc1	Leucine-rich repeat and coiled-coil domain-containing protein 1	Q69ZB0	-0.418409	-0.520087	-0.0216237	-0.32004	0.152068	0.0849928
Vprbp	Protein VPRBP	Q80TR8	-0.17571	-0.828037	-0.2763	-0.426683	0.202767	0.0850108
Serpinh1	Serpin H1	P19324	0.00946489	0.195616	0.145817	0.116966	0.0556397	0.0851394
Uri1	Unconventional prefoldin RPB5 interactor	Q3TLD5	-0.426316	-0.120194	-0.108952	-0.218487	0.103965	0.0851797
Kdm2a	Lysine-specific demethylase 2A	P59997	0.364112	0.109911	0.0864469	0.186824	0.0889028	0.0851865
Rreb1	Ras-responsive element-binding protein 1	Q3UH06	0.0313866		0.0551236	0.0432551	0.0118685	0.0852415
Ubqln2	Ubiquilin-2	Q9QZM0	0.395262	0.221396	0.0362221	0.217627	0.103663	0.085314
Tsc1	Hamartin	Q9EP53	0.0663879	0.403806	0.161845	0.21068	0.100418	0.0853967
Drg2	Developmentally-regulated GTP-binding protein 2	Q9QXB9	-0.219103	-0.0302555	-0.0981435	-0.115834	0.0552284	0.0854377
Lox	Protein-lysine 6-oxidase	P28301	0.16217	0.910806	0.344361	0.472446	0.225402	0.0855211
Lmnb2	Lamin-B2	P21619	0.0140311	0.233506	0.156346	0.134628	0.0642808	0.085623
Cox16	Putative uncharacterized protein	Q3UFD0	-0.180365	-0.0297404	-0.0717475	-0.093951	0.0448765	0.085674
Col12a1	Collagen alpha-1(XII) chain	Q60847	0.131335	0.263832	0.0299877	0.141718	0.0677044	0.0856958
Ahsa1	Putative uncharacterized protein	Q3TL79	-0.0829498	-0.0479825	-0.240156	-0.123696	0.0590983	0.0857044
Osbp	Oxysterol-binding protein 1	Q3B7Z2	0.125099	0.0632394	0.342242	0.17686	0.0845972	0.0858557
Cd81	CD81 antigen	P35762	0.0780926	0.390073	0.133982	0.200716	0.0960434	0.0859038
Golga3	Golgin subfamily A member 3	P55937	0.0962458	0.161964	0.0126238	0.0902779	0.043214	0.0859509
Timm13	Mitochondrial import inner membrane translocase subunit Tim13	P62075	-0.267448	-0.00790191	-0.282625	-0.185991	0.0891525	0.08613
Afap1	Actin filament-associated protein 1	Q80YS6	0.0400509	0.574468	0.355422	0.323314	0.155106	0.0862393
Tsc22d2	Protein Tsc22d2	E9Q7M2	0.141916	0.118858	0.0046312	0.0884683	0.0424438	0.0862457
Spr	Sepiapterin reductase	Q91XH5	0.00465978	0.130557	0.151675	0.0956305	0.045892	0.0862803
Msh6	DNA mismatch repair protein Msh6	P54276	0.494841	0.0702054	0.213914	0.259654	0.124697	0.0863764
Tmed2	Putative uncharacterized protein	Q8C1Z9	0.252052	0.00719358	0.270056	0.176434	0.0847796	0.0864511
Flot1	Flotillin-1	O08917	0.0364307	0.45421	0.262935	0.251192	0.120745	0.0864979
Gfpt1	Glutamine--fructose-6-phosphate aminotransferase [isomerizing] 1	P47856	0.0357549	0.16733	0.0537547	0.0856132	0.0411875	0.0866063
Lman2	Vesicular integral-membrane protein VIP36	Q9DBH5	0.317682	0.75013	0.109069	0.392294	0.188781	0.0866433
Noc4l	Putative uncharacterized protein	Q3UKH4	-0.845678	-0.346534	-0.129266	-0.440493	0.212079	0.0867069
Arih2	Ariadne homolog 2 (Drosophila), isoform CRA_a	Q3TK92	0.542971	0.232467	0.0772399	0.284226	0.136913	0.086774
Etfa	Electron transfer flavoprotein subunit alpha, mitochondrial	Q99LC5	0.211608	0.005421	0.22089	0.145973	0.0703271	0.0867947
Nap1l4	Nucleosome assembly protein 1-like 4	Q78ZA7	0.0712824		0.0401241	0.0557032	0.0155792	0.0868075
Pld1	Phospholipase D1	Q6NVF2	2.98739	1.09362	0.536107	1.53904	0.741845	0.0868591
Katnb1	Katanin p80 WD40 repeat-containing subunit B1	Q8BG40	0.155491	0.0101027	0.218772	0.128122	0.0617724	0.0868918
Plod1	Putative uncharacterized protein	Q3UE11	0.222175	0.685637	0.143632	0.350481	0.169105	0.0869882
Mthfd1l	Monofunctional C1-tetrahydrofolate synthase, mitochondrial	Q3V3R1	-0.249184	-0.0417732	-0.0954176	-0.128792	0.0621562	0.0870203
Mllt4	Afadin	E9Q9C3	-0.00105051	-0.0344348	-0.0395542	-0.0250132	0.0120721	0.0870257
Nat2	Arylamine N-acetyltransferase 2	P50295	0.731658		0.410894	0.571276	0.160382	0.0871208
Adam15	Disintegrin and metalloproteinase domain-containing protein 15	O88839	0.137006		0.24396	0.190483	0.0534772	0.0871213
Pdlim2	PDZ and LIM domain protein 2	Q8R1G6	0.57653	1.02762		0.802075	0.225545	0.0872561
Tdp1	Tyrosyl-DNA phosphodiesterase 1	Q8BJ37	0.0897215	0.122678	0.402606	0.205002	0.0992591	0.0874487
Eps8l2	Epidermal growth factor receptor kinase substrate 8-like protein 2	Q99K30	-0.0205517	-0.123638	-0.0470197	-0.0637365	0.0309101	0.0876608
Bad	Putative uncharacterized protein (Fragment)	Q3TFU7	0.852961	0.0184356	0.766909	0.546102	0.265	0.0877401
R3hdm4	R3H domain-containing protein 4	Q4VBF2		1.95273	1.09069	1.52171	0.43102	0.087859
Ogdh	2-oxoglutarate dehydrogenase, mitochondrial	Q60597	0.0798566	0.260722	0.0570198	0.132533	0.0644328	0.0879868
Enpp4	Bis(5'-adenosyl)-triphosphatase enpp4	Q8BTJ4	0.321449	0.576258		0.448853	0.127404	0.0880349
Abcc1	Multidrug resistance-associated protein 1	O35379	-0.345372	-0.0165826	-0.465269	-0.275741	0.134122	0.0880524
Cdk6	Cyclin-dependent kinase 6	Q0VBK8	-0.0548188	-0.56811	-0.291531	-0.30482	0.148323	0.0881034
Cpne1	Putative uncharacterized protein	Q3U893		0.136824	0.245588	0.191206	0.0543819	0.0882031
Asl	Putative uncharacterized protein	Q3UUH0	0.199112	0.0101135	0.131228	0.113485	0.0552758	0.0882353
Rnf149	E3 ubiquitin-protein ligase RNF149	Q3U2C5	0.28752		0.160143	0.223831	0.0636882	0.0882388
Rad50	DNA repair protein RAD50	P70388	-0.0657542	-0.00700263	-0.108587	-0.060448	0.0294447	0.0882435
Mrps18a	28S ribosomal protein S18a, mitochondrial	Q5U5I3	-0.761804	-0.286377	-0.126556	-0.391579	0.190775	0.0882671
Fdft1	Squalene synthase	P53798	-0.171543	-0.143603	-0.605535	-0.306894	0.149538	0.0882859
Bzw1	Basic leucine zipper and W2 domain-containing protein 1	Q9CQC6	0.35321	0.0806988	0.103454	0.179121	0.0872921	0.0883055
Ppia	Peptidyl-prolyl cis-trans isomerase A	P17742	0.0540769	0.158285	0.0299531	0.0807715	0.0393772	0.0883538
Pvrl2	Poliovirus receptor-related protein 2	P32507	0.245814	0.44194		0.343877	0.0980626	0.0884246
Gde1	Glycerophosphodiester phosphodiesterase 1	Q9JL56	-0.292335		-0.162386	-0.227361	0.0649745	0.0886041
Golph3	Putative uncharacterized protein	Q3UWP6	-0.100136	-0.00840095	-0.15671	-0.0884158	0.0432124	0.0886877
Utp18	Putative uncharacterized protein	Q3TJX6	-0.349004	-0.334254	-0.00521226	-0.22949	0.11222	0.0887571
Tkt	Transketolase	P40142	0.221214	0.0272612	0.0987665	0.115747	0.0566295	0.0888266
Irs2	Insulin receptor substrate 2	P81122	1.51406	0.242614	0.575856	0.77751	0.380633	0.0889087
Mcm7	MCG10694, isoform CRA_a	Q3U4T8	0.118469	0.224118	0.0194527	0.12068	0.0590921	0.0889378
Speg	Striated muscle-specific serine/threonine-protein kinase	Q62407	0.665288	0.110359	0.247005	0.340884	0.16693	0.0889476
Colgalt1	Procollagen galactosyltransferase 1	Q8K297	-0.177151	-0.102857	-0.012178	-0.0973954	0.0477018	0.0889691
Scaf4	MKIAA1172 protein (Fragment)	Q69ZP8	0.219701	0.584898	0.0952631	0.299954	0.146931	0.0889878
L2hgdh	L-2-hydroxyglutarate dehydrogenase, mitochondrial	Q91YP0	0.534551	0.927369	0.0644716	0.508797	0.24943	0.0890939
Brat1	BRCA1-associated ATM activator 1	Q8C3R1	0.261704	0.734211	0.128484	0.3748	0.183774	0.0891194
Stt3a	Dolichyl-diphosphooligosaccharide--protein glycosyltransferase subunit STT3A	P46978	0.105886	0.0238863	0.03082	0.0535306	0.0262539	0.0891516
Trps1	Trps1 protein	Q499D6	-1.20513	-0.2698	-0.353023	-0.609318	0.298874	0.0891678
Xpnpep1	X-prolyl aminopeptidase (Aminopeptidase P) 1, soluble, isoform CRA_b	Q3UE92	0.0467105	0.0413212	0.171327	0.086453	0.0424657	0.0893567
Rpap2	Putative RNA polymerase II subunit B1 CTD phosphatase Rpap2	Q8VC34	-0.0338845	-0.185289	-0.0636055	-0.0942596	0.0463162	0.0894027
Arhgap24	Rho GTPase-activating protein 24	Q8C4V1	0.1212	0.167235	0.558792	0.282409	0.138829	0.0894627
Ube2l3	Ubiquitin-conjugating enzyme E2 L3	P68037	-0.239124	-0.0589796	-0.06367	-0.120591	0.0592818	0.0894638
Spag5	Sperm-associated antigen 5	Q7TME2	0.427091	0.0325102	0.235616	0.231739	0.113922	0.0894647
Mical2	Protein-methionine sulfoxide oxidase MICAL2	Q8BML1	0.399462		0.723883	0.561672	0.16221	0.0894925
Chmp7	Charged multivesicular body protein 7	Q8R1T1	0.140326	0.146495	0.00160001	0.0961403	0.0473037	0.089582
Fhl1	Four and a half LIM domains protein 1	P97447	0.402729	0.0575036	0.162076	0.207436	0.102206	0.0897682
Iqgap3	IQ motif containing GTPase activating protein 3	B9EKT6	0.00592131	0.230428	0.174351	0.1369	0.0674604	0.0897844
Hira	Protein HIRA	Q61666	-0.72669		-1.32056	-1.02362	0.296933	0.0898691
Hn1	Hematological and neurological expressed 1 protein	P97825	-0.0476597	-0.425988	-0.195103	-0.222917	0.110096	0.0900881
Ncor2	Nuclear receptor corepressor 2	F8VQL9	0.0399001	0.0726736		0.0562868	0.0163867	0.0901767
Pecr	Peroxisomal trans-2-enoyl-CoA reductase	Q3UXD9	-0.29892	-0.0732682	-0.0788391	-0.150342	0.0743062	0.0901857
Atp13a1	Probable cation-transporting ATPase 13A1	Q9EPE9	-0.187769	-0.0014833	-0.194315	-0.127856	0.0632146	0.0902331
Usp48	Ubiquitin carboxyl-terminal hydrolase 48	Q3V0C5	-0.473144	-0.0280273	-0.280759	-0.260644	0.128887	0.0902537
Tollip	Toll-interacting protein	Q9QZ06	0.510383	0.149303	0.111531	0.257073	0.127124	0.0902564
Uba1	Ubiquitin-like modifier-activating enzyme 1	Q02053	-0.140762	-0.0100929	-0.077984	-0.0762798	0.0377307	0.0902917
Thoc2	THO complex subunit 2	B1AZI6	-0.0219437	-0.155949	-0.0625232	-0.0801387	0.0396741	0.0904094
Plscr3	Putative uncharacterized protein	Q5F283	-0.509507	-0.279143		-0.394325	0.115182	0.0904615
Podxl	Putative uncharacterized protein (Fragment)	Q3UYF4	0.529259	0.289477		0.409368	0.119891	0.0906867
Rabgap1l	Putative uncharacterized protein (Fragment)	Q9CRQ7	0.646885	0.0489984	1.03032	0.575401	0.285529	0.0907246
Rcc2	Protein RCC2	Q8BK67	-0.318538	-0.00734253	-0.237494	-0.187791	0.0932083	0.0907555
Ubxn7	UBX domain-containing protein 7	Q6P5G6	-0.329164	-0.0102166	-0.229792	-0.189724	0.0942267	0.0908401
Fdx1l	Adrenodoxin-like protein, mitochondrial	Q9CPW2	-0.845216	-0.315008	-0.13182	-0.430682	0.213907	0.0908457
Phb	Prohibitin	P67778	-0.724041	-0.168646	-0.196365	-0.363017	0.180689	0.091137
Rnf2	E3 ubiquitin-protein ligase RING2	Q9CQJ4	0.378338	0.550849	0.0175836	0.31559	0.157105	0.0911565
Fam136a	Protein FAM136A	Q9CR98	-1.1424	-0.156766	-0.457344	-0.585502	0.291653	0.0912414
Map3k4	Mitogen-activated protein kinase kinase kinase 4	O08648	-0.529876	-0.103803	-0.166152	-0.266611	0.132858	0.0912948
Dyrk1a	Dual specificity tyrosine-phosphorylation-regulated kinase 1A	Q61214	0.157668	0.488946	0.0923299	0.246315	0.122773	0.0913271
Cfl1	Cofilin-1	P18760	-0.0117823	-0.150638	-0.0788	-0.0804067	0.0400922	0.0913754
Atad3	ATPase family AAA domain-containing protein 3	Q925I1	-0.382539	-0.0602655	-0.139948	-0.194251	0.0969135	0.0914548
Iqgap1	Ras GTPase-activating-like protein IQGAP1	Q9JKF1	0.229296	0.230878	0.000297486	0.153491	0.0765979	0.0914904
Coro1b	Coronin-1B	Q9WUM3	0.600315	0.0707955	0.260061	0.310391	0.154917	0.0915074
Ptgr2	Prostaglandin reductase 2	Q3TXN1	0.0265119	0.665137	0.427764	0.373138	0.186368	0.0916049
Ddx3x	Putative uncharacterized protein	Q3TQX5	-0.536713	-0.291255		-0.413984	0.122729	0.0917384
Slc23a2	Putative uncharacterized protein (Fragment)	Q3TDU7	-0.0900934	-0.225118	-0.600677	-0.305296	0.152747	0.0918403
Cxx1b	CAAX box 1 homolog A (Human)	Q9D1F0	6.18228	0.00669088	5.6621	3.95036	1.97754	0.0919146
Dhx38	MKIAA0224 protein (Fragment)	Q6A0A1	-0.173206	-0.0892553	-0.0135631	-0.092008	0.0461054	0.0920515
Eif2s2	Eif2s2 protein	Q3ULL5	-0.142711	-0.380869	-0.0566523	-0.193411	0.0969657	0.0921179
Ssh3	Protein phosphatase Slingshot homolog 3	Q8K330	0.623802	0.144008	0.166824	0.311545	0.156268	0.0921842
Stim1	Stromal interaction molecule 1	P70302	0.319083	0.306352	-0.000566336	0.20829	0.104493	0.0922062
Dpy19l1	Probable C-mannosyltransferase DPY19L1	A6X919	-0.0447724	-0.0887437	-0.00726832	-0.0469282	0.0235446	0.0922187
Gys1	Glycogen [starch] synthase, muscle	Q9Z1E4		0.082152	0.15211	0.117131	0.034979	0.0923738
Srrt	Serrate RNA effector molecule homolog	Q99MR6	-0.0352921	-0.0492512	-0.16927	-0.0846045	0.0425243	0.0924659
Polg	DNA polymerase subunit gamma-1	P54099	0.94545	0.57512	0.0428149	0.521128	0.261963	0.0924823
Haus2	HAUS augmin-like complex subunit 2	Q9CQS9	-0.00237304	-0.522999	-0.628447	-0.384606	0.193526	0.0926168
Thoc3	THO complex subunit 3	Q8VE80	-0.519877	-1.42102	-0.21563	-0.718841	0.361906	0.0926929
Pbrm1	Protein polybromo-1	Q8BSQ9	-0.0713516	0.000278232	-0.0663864	-0.0458199	0.0230936	0.0928425
	Uncharacterized protein KIAA1143 homolog	Q8K039	1.24982	0.671798		0.960807	0.289008	0.0930064
Junb	Transcription factor jun-B	P09450	0.382002		0.205241	0.293622	0.0883804	0.0930658
Nup133	Putative uncharacterized protein	Q8CDZ5	0.000958355	0.0280572	0.0179485	0.0156547	0.0079064	0.0931261
Alg1	Chitobiosyldiphosphodolichol beta-mannosyltransferase	Q921Q3	-1.25626		-0.673556	-0.964907	0.291351	0.0933418
Plod3	Procollagen-lysine,2-oxoglutarate 5-dioxygenase 3	Q9R0E1	0.0942237	0.190601	0.0153754	0.100067	0.0506677	0.0934769
Tmem87a	Transmembrane protein 87A	Q8BXN9	0.0527496	0.759825	0.396255	0.402943	0.204142	0.0935557
Aup1	Ancient ubiquitous protein 1	P70295	-0.02542	-0.00595705	-0.00650034	-0.0126258	0.00639902	0.0936082
Sass6	Spindle assembly abnormal protein 6 homolog	Q80UK7	0.0593974	0.405153	0.148609	0.204387	0.103634	0.0936702
Gmip	GEM-interacting protein	Q6PGG2	0.275217	-0.00267139	0.269593	0.180713	0.0917065	0.0937849
Gja1	Gap junction alpha-1 protein	P23242	-0.400712	-0.166628	-1.11143	-0.559589	0.284073	0.0938325
Tmlhe	Trimethyllysine dioxygenase, mitochondrial	Q91ZE0	-0.2416	-1.37878	-0.445988	-0.68879	0.350004	0.0939681
Phf14	PHD finger protein 14	Q9D4H9	0.46212	0.80483	0.0395295	0.435493	0.221324	0.0939873
Cog7	Putative uncharacterized protein	Q3TR20	0.2465		0.462166	0.354333	0.107833	0.0940356
Xpo5	Exportin-5	Q924C1	-0.110304	-1.3299e-05	-0.0885493	-0.066289	0.0337277	0.094146
Arl6	ADP-ribosylation factor-like protein 6	O88848	0.0885648		0.166191	0.127378	0.0388133	0.0941471
	UPF0505 protein C16orf62 homolog	Q8BWQ6	0.109153	0.204922		0.157038	0.0478843	0.0942091
Ublcp1	Ubiquitin-like domain-containing CTD phosphatase 1	Q8BGR9	-0.119688	-0.224704		-0.172196	0.052508	0.0942116
Ccnt1	Cyclin-T1	Q9QWV9	1.37639	-0.00738461	1.63456	1.00119	0.509763	0.0942442
F2r	Proteinase-activated receptor 1	P30558	-0.596317	-1.96092	-0.370237	-0.975826	0.496854	0.0942453
Ttl	Tubulin--tyrosine ligase	P38585	0.579114	1.38328	0.156883	0.706425	0.359707	0.0942537
Nfs1	Cysteine desulfurase, mitochondrial	Q8C6I5	0.258243	0.0355575	0.097236	0.130346	0.0663813	0.0942748
Gtf3c1	Putative uncharacterized protein	Q3UHL0	-0.168844	-0.0196938	-0.069417	-0.0859848	0.0438456	0.0944519
Pofut2	Putative uncharacterized protein	Q3V1L7	0.0703569	0.215005	0.0365753	0.107312	0.0547222	0.0944552
Ttc28	Tetratricopeptide repeat protein 28	Q80XJ3		0.890394	0.472991	0.681693	0.208701	0.0945669
Trmt1l	TRMT1-like protein	A2RSY6	0.955002	0.163528	0.309583	0.476038	0.243165	0.0946938
Kank2	KN motif and ankyrin repeat domain-containing protein 2	Q8BX02	0.995035	0.235471	0.245857	0.492121	0.251475	0.0947457
Lamp1	Lysosome-associated membrane glycoprotein 1	P11438	-0.188547	-0.659204	-0.132614	-0.326788	0.16699	0.0947466
Zfp384	Putative uncharacterized protein	Q3T9J2	-1.74111		-3.28291	-2.51201	0.7709	0.0947805
Srpk2	WW domain binding protein 6 (Fragment)	O08551	0.283162	0.759153	0.104097	0.382138	0.195467	0.0948836
Dnajc24	DnaJ homolog subfamily C member 24	Q91ZF0	-0.299289	-0.832618	-0.121155	-0.417688	0.213743	0.0949438
Me2	NAD-dependent malic enzyme, mitochondrial	Q99KE1	-0.11974	0.00177477	-0.128648	-0.0822043	0.0420682	0.0949498
Sgol1	Shugoshin-like 1	Q9CXH7	1.22647	0.179291	0.439512	0.61509	0.314783	0.0949539
4930402H24Rik	Putative uncharacterized protein (Fragment)	Q3TYT7	0.519665		0.981385	0.750525	0.23086	0.0949878
Usp9x	Probable ubiquitin carboxyl-terminal hydrolase FAF-X	P70398	-0.0862936	-0.00607777	-0.147632	-0.080001	0.040984	0.0950972
Knop1	Lysine-rich nucleolar protein 1	Q9Z2Q2	-0.221001	0.00274204	-0.254912	-0.157724	0.0808278	0.0951438
Nfya	Nuclear transcription factor Y subunit alpha	P23708	1.99376		1.05381	1.52378	0.469974	0.0952285
Med13l	Med13l protein (Fragment)	Q6GQS5	3.09106		5.85052	4.47079	1.37973	0.0952819
Wls	Protein wntless homolog	Q6DID7	-0.423624	-0.0367168	-0.195902	-0.218748	0.112273	0.0953586
Celf1	CUGBP Elav-like family member 1	P28659	-0.316585	-0.000698659	-0.235958	-0.184414	0.0947605	0.0955197
Ptk2b	Protein-tyrosine kinase 2-beta	Q3UDE9	1.15641		0.609855	0.883133	0.273278	0.0955237
Acaa2	3-ketoacyl-CoA thiolase, mitochondrial	Q8BWT1	0.0405109	0.0718377	0.229989	0.114113	0.0586399	0.0955279
Usp14	Ubiquitin carboxyl-terminal hydrolase 14	Q9JMA1	-0.100015	-0.0103321	-0.186524	-0.0989571	0.0508649	0.0955639
Ankrd16	Ankyrin repeat domain-containing protein 16	A2AS55	0.375012	0.0548408	0.13265	0.187501	0.0964084	0.0956092
Iah1	Isoamyl acetate-hydrolyzing esterase 1 homolog	Q9DB29	0.619806	0.326266		0.473036	0.14677	0.0957648
Pkia	cAMP-dependent protein kinase inhibitor alpha	P63248	1.33025		0.699868	1.01506	0.315192	0.0958356
Pck2	Putative uncharacterized protein	Q3TDE6	-0.00494411	0.251446	0.239072	0.161858	0.0834775	0.0960361
Eif3f	Eukaryotic translation initiation factor 3 subunit F	Q3U8X1	-0.144412	-0.114366	-0.541645	-0.266808	0.137692	0.0961251
Impa2	Putative uncharacterized protein	Q3TAU6	0.0572757	0.420591	0.1537	0.210522	0.10866	0.0961451
Polr1d	DNA-directed RNA polymerases I and III subunit RPAC2	P97304	-0.745184	7.21791e-05	-0.553586	-0.432899	0.223439	0.0961453
Farsa	Farsla protein	Q4FJQ2	-0.0852717	-0.0303307	-0.229442	-0.115015	0.0593713	0.0961612
Cox17	Cytochrome c oxidase copper chaperone	P56394	0.345268	0.349731	1.46061	0.718537	0.37104	0.0962094
Dip2b	Disco-interacting protein 2 homolog B	Q3UH60	0.926252	0.515936	0.0418478	0.494679	0.255527	0.0962551
Umps	Uridine 5'-monophosphate synthase	P13439	-0.00203062	-0.134831	-0.089317	-0.075393	0.0389633	0.0963237
ptplad1	Very-long-chain (3R)-3-hydroxyacyl-[acyl-carrier protein] dehydratase 3	Q8K2C9	-4.54474	0.0954576	-4.29247	-2.91392	1.50645	0.096373
Dnaja1	DnaJ homolog subfamily A member 1	P63037	-0.262214	0.00334661	-0.214754	-0.157874	0.0817663	0.0966279
Tbc1d20	TBC1 domain family, member 20	Q0P648	0.309081	0.161581		0.235331	0.0737501	0.0966689
Pip4k2b	Phosphatidylinositol-4-phosphate 5-kinase, type II, beta	Q3UJ95	0.738634	0.102485	0.263502	0.368207	0.190957	0.096816
Fam114a2	Protein FAM114A2	Q8VE88	0.368819	-0.00378885	0.476007	0.280346	0.145398	0.0968228
Sfxn1	Sideroflexin-1	Q99JR1	-0.272218	-0.00303945	-0.398135	-0.224464	0.116527	0.0969574
Bap18	Chromatin complexes subunit BAP18	Q9DCT6	-0.208962	-1.38289	-2.88763	-1.49316	0.775229	0.0969718
Capzb	F-actin-capping protein subunit beta	P47757	0.385514	0.211986	0.0169095	0.204803	0.106468	0.0971531
Tatdn2	Putative uncharacterized protein	Q3U179	-0.286915	-1.17772	-0.267385	-0.57734	0.300243	0.0972055
Vrk2	Serine/threonine-protein kinase VRK2	Q8BN21	-0.0462469	-0.0890009		-0.0676239	0.021377	0.0974588
Tex30	Testis-expressed sequence 30 protein	Q3TUU5	-0.134078		-0.258158	-0.196118	0.0620399	0.0975234
Arid4a	Arid4a protein (Fragment)	Q6PE90	-0.0213301	-0.0981875	-0.228551	-0.116023	0.0604806	0.0975416
Ubl7	Ubiquitin-like 7 (Bone marrow stromal cell-derived)	Q52L66	-0.0855087	-0.054072	-0.00143871	-0.0470065	0.0245247	0.0976635
Prmt5	Protein arginine N-methyltransferase 5	Q8CIG8	-0.333577	-0.0071495	-0.518127	-0.286284	0.14939	0.0976887
Myg1	Melanocyte proliferating gene 1	Q8R038	-0.0768169	0.00149077	-0.0642235	-0.0465165	0.0242774	0.097712
Wdr90	WD repeat-containing protein 90	Q6ZPG2	0.168384	1.28798	0.466197	0.640853	0.334789	0.0978488
Rangrf	Ran guanine nucleotide release factor	Q9JIB0	-0.708698	-0.367146		-0.537922	0.170776	0.0978515
H2-D1	H-2D cell surface glycoprotein (Fragment)	O78207	0.125929	0.870803	0.29628	0.431004	0.225331	0.0979556
Pkmyt1	Membrane-associated tyrosine- and threonine-specific cdc2-inhibitory kinase	Q9ESG9	0.316923		0.612502	0.464712	0.147789	0.0980105
Atg14	Beclin 1-associated autophagy-related key regulator	Q8CDJ3		0.291906	0.564532	0.428219	0.136313	0.098098
Taf4a	Protein Taf4a	E9QAP7	-0.67515	-0.685737	-2.92295	-1.42795	0.747509	0.0981406
Cnpy3	Protein canopy homolog 3	Q9DAU1	-0.0994975		-0.0513806	-0.0754391	0.0240585	0.0982674
Ifitm3	Interferon-induced transmembrane protein 3	Q9CQW9	1.28424	0.417184	3.43587	1.71243	0.897335	0.0982836
Katnal1	Katanin p60 ATPase-containing subunit A-like 1	Q8K0T4		0.216928	0.420633	0.31878	0.101852	0.098439
Tssc1	Protein TSSC1	Q8K0G5	0.429293	-0.0137508	0.422724	0.279422	0.146599	0.098457
Wibg	Partner of Y14 and mago	Q8CHP5	0.425572	-0.00632732	0.327427	0.248891	0.130716	0.0986054
Ddx20	DEAD-box corepressor DP103 alpha	Q8R4Z6	-0.646115	-0.174729	-0.126175	-0.315673	0.165815	0.0986265
Ccsmst1	Protein CCSMST1	Q6RUT7	0.214919	1.25998	0.37779	0.617564	0.324632	0.098733
Cdk1	Cyclin-dependent kinase 1	P11440	-0.00260255	-0.117129	-0.187083	-0.102272	0.0537706	0.0987594
Supt20h	Transcription factor SPT20 homolog	Q7TT00	0.933023	0.51188	0.0347712	0.493225	0.259471	0.0988429
Tmed1	Tmed1 protein	Q05DM6	1.43935	1.08521	-0.0208652	0.834564	0.439762	0.0990784
Coil	Putative uncharacterized protein	Q3UJN9	-1.09419		-2.13239	-1.61329	0.519097	0.0990904
Znf512	Zinc finger protein 512	Q69Z99	0.188457		0.368283	0.27837	0.089913	0.0994463
Zfpm2	Zinc finger protein ZFPM2	Q8CCH7	-0.227269	-0.902364	-0.187383	-0.439005	0.231965	0.0994726
Anapc7	Anaphase-promoting complex subunit 7	Q9WVM3	-0.41019	0.0154123	-0.429869	-0.274882	0.145258	0.0994864
Fam76a	Protein FAM76A	Q922G2		0.225189	0.440302	0.332746	0.107556	0.0995157
Casc5	Protein CASC5	A3KGI3	0.565534	0.30456	0.0214868	0.297193	0.157096	0.0995298
Clns1a	Methylosome subunit pICln	Q61189	-0.522566	-0.248771	-0.0327298	-0.268022	0.141731	0.0995851
Rhox5	Homeobox protein Rhox5	P52651		1.03341	2.02208	1.52774	0.494335	0.0996119
Srsf11	Protein Srsf11 (Fragment)	F6XR65	0.530769	0.0078616	0.323094	0.287241	0.152011	0.0996958
Dpp9	Dipeptidyl peptidase 9	Q8BVG4	0.0809724	0.123639	0.000325411	0.0683124	0.0361561	0.0997137
Krt14	Type I epidermal keratin mRNA, 3'end (Fragment)	Q61782	-2.73491	-5.35658		-4.04574	1.31084	0.0997363
Vps11	Vacuolar protein sorting-associated protein 11 homolog	Q91W86	0.0758089	0.0318381	0.226771	0.111473	0.0590301	0.0997875
Ankib1	Ankyrin repeat and IBR domain-containing protein 1	Q6ZPS6	0.380334	0.747331	0.0358157	0.387827	0.205431	0.0998282
Zcchc24	Zinc finger CCHC domain-containing protein 24	B2RVL6	-0.243223	-0.124052		-0.183637	0.0595859	0.0998722
Pih1d1	PIH1 domain-containing protein 1	Q9CQJ2	-0.22553	-0.115024		-0.170277	0.0552529	0.0998759
Orc1	Putative uncharacterized protein	Q3TPY7	-0.0292012	-0.427281	-0.196764	-0.217749	0.115394	0.0998941
Sco2	Protein SCO2 homolog, mitochondrial	Q8VCL2	-0.325862		-0.639335	-0.482598	0.156737	0.0999588
Rpa1	Putative uncharacterized protein	Q3U8B3	0.0800809	0.0444	0.268074	0.130852	0.0693801	0.09997
Wdhd1	WD repeat and HMG-box DNA-binding protein 1	P59328	-0.0022339	0.128306	0.0958757	0.0739827	0.0392414	0.100023
Heatr6	HEAT repeat-containing protein 6	Q6P1G0	0.216307	0.0505044	0.532627	0.26648	0.14142	0.100099
Vbp1	Prefoldin subunit 3	P61759	-0.111568	0.00299244	-0.0897338	-0.066103	0.0351179	0.100253
Bccip	BRCA2 and CDKN1A-interacting protein	Q9CWI3	0.446775	0.278166	0.00340582	0.242782	0.129207	0.100505
Npepps	Puromycin-sensitive aminopeptidase	Q11011	-0.218122	-0.688973	-0.10313	-0.336742	0.179217	0.10051
Midn	Midnolin	Q3TPJ7	0.121864	0.240124		0.180994	0.0591302	0.100511
Bloc1s3	Biogenesis of lysosome-related organelles complex 1 subunit 3	Q5U5M8	0.351984	0.927495	0.0997638	0.459747	0.244945	0.100666
Cep135	Putative uncharacterized protein	Q3UVI6	-0.0480379	-1.2759	-0.671991	-0.66531	0.354469	0.100667
Usp46	Ubiquitin carboxyl-terminal hydrolase 46	P62069	-0.643022		-0.32585	-0.484436	0.158586	0.100703
Nxf1	Putative uncharacterized protein	Q8BP60	-0.369972	-0.0801145	-0.0871381	-0.179075	0.0954701	0.10076
Mettl2	Methyltransferase-like protein 2	Q8BMK1	0.753773		1.48836	1.12107	0.367295	0.10078
Ehmt1	Histone-lysine N-methyltransferase EHMT1 (Fragment)	A2AIS5	-0.00053427	0.0433154	0.0304033	0.0243948	0.0130099	0.100808
Brf1	Transcription factor IIIB 90 kDa subunit	Q8CFK2	0.394186	0.431409	-0.0172781	0.269439	0.143761	0.100876
Usp16	Ubiquitin carboxyl-terminal hydrolase 16	Q99LG0	0.304953	0.145573	0.0172868	0.155938	0.0832037	0.10088
Twsg1	Twisted gastrulation protein homolog 1	Q9EP52	0.312108	0.801917	0.0806702	0.398232	0.212613	0.100967
Ccdc80	Coiled-coil domain-containing protein 80	Q8R2G6		-0.348137	-0.68846	-0.518299	0.170162	0.100975
Snx33	Sorting nexin-33	Q4VAA7	0.0760123	0.226699	0.635005	0.312572	0.166982	0.101056
Fam96b	Mitotic spindle-associated MMXD complex subunit MIP18	Q9D187	1.33697	0.224732	0.385573	0.64909	0.347057	0.101181
Hnrnpc	Putative uncharacterized protein	Q3U6P5	-0.294565	0.0134638	-0.295998	-0.192366	0.102916	0.101267
Rps6ka4	Ribosomal protein S6 kinase alpha-4	Q9Z2B9	-0.221509	-0.555807	-1.66101	-0.812776	0.434959	0.101309
Mlkl	Mixed lineage kinase domain-like protein	Q9D2Y4	0.146124	0.444937	0.0611707	0.217411	0.116377	0.101345
Dync1li2	Cytoplasmic dynein 1 light intermediate chain 2	Q6PDL0	0.67724	0.045488	0.304683	0.34247	0.183347	0.101367
U2surp	U2 snRNP-associated SURP motif-containing protein	Q6NV83	-0.137688	-0.222416	-0.000873249	-0.120326	0.0645404	0.101642
Kiaa1009	Protein QN1 homolog	Q6ZQ06	-0.0230177	-0.045768		-0.0343928	0.0113752	0.101673
Hmgb3	High mobility group protein B3	O54879	0.294833	0.938742	0.137007	0.456861	0.24521	0.101737
Dctd	Deoxycytidylate deaminase	Q3UUA6	0.89771	1.57105	0.0273045	0.832021	0.446849	0.101828
F5	Coagulation factor V	O88783	-4.61826		-9.19457	-6.90642	2.28815	0.101836
Spag9	JNK-interacting leucine zipper protein long form	B8X349	0.0739005	-0.00261466	0.0977798	0.0563552	0.03028	0.101893
Zyg11b	Protein zyg-11 homolog B	Q3UFS0	-1.18193	0.0366498	-1.61687	-0.920714	0.494874	0.101943
Slc25a3	Putative uncharacterized protein	Q3THU8	-0.389448	-0.131584	-0.0497578	-0.190263	0.102355	0.102072
Pus10	Putative tRNA pseudouridine synthase Pus10	Q9D3U0	-0.434378	-0.0772942	-0.117785	-0.209819	0.112886	0.102086
Magee1	Melanoma-associated antigen E1	Q6PCZ4	0.0159573	0.48352	0.252767	0.250748	0.134978	0.102162
Psmc2	26S protease regulatory subunit 7	P46471	-0.0654912	-0.390996	-0.11063	-0.189039	0.101816	0.102243
Fbl	rRNA 2'-O-methyltransferase fibrillarin	P35550	-0.288169	0.014422	-0.28667	-0.186806	0.100615	0.102246
Cenpq	Centromere protein Q	Q9CPQ5	0.663786	1.76432	0.180621	0.869577	0.468612	0.102324
Smg7	Protein SMG7	Q5RJH6	0.979042	0.42323	0.0699882	0.490753	0.264584	0.10239
Hdac10	Hdac10 protein	Q05DI9	0.0512275	-1.02989	-1.19305	-0.723906	0.390418	0.10244
Tube1	Tubulin epsilon chain	Q9D6T1	-0.652504		-0.326066	-0.489285	0.163219	0.102489
Col8a1	Collagen alpha-1(VIII) chain	Q00780	1.72768		0.863252	1.29547	0.432216	0.102503
Sec13	Protein SEC13 homolog	Q9D1M0	0.0554191	0.173112	0.0239099	0.084147	0.045403	0.102506
Ranbp1	Ran-specific GTPase-activating protein	P34022	-0.00896315	-0.239205	-0.120908	-0.123026	0.0664736	0.102711
Man1b1	Putative uncharacterized protein (Fragment)	Q8BTW7	0.0449927	0.294248	0.0878986	0.14238	0.0769376	0.102724
Naa38	N-alpha-acetyltransferase 38, NatC auxiliary subunit	Q6ZWM4	-0.140813	-0.00535631	-0.256816	-0.134328	0.0726624	0.102876
Dalrd3	DALR anticodon-binding domain-containing protein 3	Q6PJN8	-0.136645		-0.27474	-0.205692	0.0690472	0.103089
Iars	Isoleucine--tRNA ligase, cytoplasmic	Q8BU30	-0.0583418	-0.00598858	-0.123073	-0.0624677	0.0338622	0.103186
Atp6v0a1	Atp6v0a1 protein	Q6NXX6	-0.0138103	0.262469	0.248811	0.165823	0.0899032	0.10321
Ephb4	Ephrin type-B receptor 4	P54761	0.426058	0.0474827	0.914067	0.462536	0.250825	0.103242
Rmnd5a	Protein RMD5 homolog A	Q80YQ8	0.285798	1.35949	0.311439	0.652241	0.3537	0.103243
Hps5	Hermansky-Pudlak syndrome 5 protein homolog	P59438		0.432586	0.871523	0.652054	0.219468	0.103345
Slc29a1	Solute carrier family 29 (Nucleoside transporters), member 1, isoform CRA_a	Q3TCZ2	0.39834	0.391704	1.80597	0.865338	0.47032	0.103575
Pgm3	Putative uncharacterized protein	Q3TFH8	0.325804	1.12226	0.174148	0.540736	0.294038	0.103646
Pola1	DNA polymerase alpha catalytic subunit	P33609	0.224715	0.0540837	0.0443078	0.107702	0.0585743	0.103668
Ablim1	Putative uncharacterized protein (Fragment)	Q3UP03	1.08885	0.200733	0.277268	0.522284	0.284144	0.103718
Prpf4b	Serine/threonine-protein kinase PRP4 homolog	Q61136	-0.200348		-0.0991462	-0.149747	0.0506011	0.103726
Bmpr2	Bone morphogenetic protein receptor type-2	O35607	0.0850234	0.237526	0.0255353	0.116028	0.0631295	0.103731
Amd1	S-adenosylmethionine decarboxylase proenzyme 1	P31154	-0.682021	-0.337363		-0.509692	0.172329	0.103781
Hccs	Cytochrome c-type heme lyase	P53702	-0.490577	-0.42032	0.0237467	-0.295717	0.161014	0.10384
Lzic	Protein LZIC	Q8K3C3	-0.11755	-0.0357202	-0.0168321	-0.0567009	0.0309095	0.104014
Pcdh19	Pcdh19 protein	Q147Z9	0.456275	1.28566	0.138947	0.62696	0.341851	0.104046
Eif2a	Eukaryotic translation initiation factor 2A	Q8BJW6	-0.0521116	-0.468177	-0.163295	-0.227861	0.124371	0.1042
Wdr81	WD repeat-containing protein 81	Q5ND34	1.01036	-0.0493219	0.846313	0.602449	0.329308	0.104416
Abcb6	ATP-binding cassette sub-family B member 6, mitochondrial	Q9DC29	0.318853	0.156851		0.237852	0.0810011	0.10448
Dpysl2	Dihydropyrimidinase-related protein 2	O08553	0.446265	0.152212	0.0512733	0.216583	0.11848	0.104531
Asb3	Ankyrin repeat and SOCS box-containing 3	Q8R5B4	1.86319	0.452072	0.356085	0.89045	0.48716	0.104545
Arid5b	AT-rich interactive domain-containing protein 5B	Q8BM75	-0.129458	-0.0181267	-0.297421	-0.148335	0.0811758	0.104586
Hadhb	Trifunctional enzyme subunit beta, mitochondrial	Q99JY0	0.0562018	0.0793551	-0.00232666	0.0444101	0.0243054	0.1046
Rpl27a	60S ribosomal protein L27a	P14115	0.46213	0.941456		0.701793	0.239663	0.104751
Wdr44	WD repeat-containing protein 44	Q6NVE8	0.0601976	0.241824	0.0444957	0.115506	0.0633215	0.104847
Prkrir	52 kDa repressor of the inhibitor of the protein kinase	Q9CUX1	-0.33101		-0.675081	-0.503046	0.172035	0.104889
Osbpl7	Oxysterol-binding protein (Fragment)	Q3TAX1	-0.689551	-0.338042		-0.513797	0.175754	0.104913
Ncam1	Neural cell adhesion molecule 1	P13595	0.329457	0.184714	0.0027269	0.172299	0.094523	0.104952
Mrpl55	39S ribosomal protein L55, mitochondrial	Q9CZ83	1.41724	3.31966	0.209302	1.64873	0.905312	0.105087
Helz	Probable helicase with zinc finger domain	Q6DFV5	0.281929	0.100478	0.0289069	0.137105	0.0753018	0.105123
Foxp1	Forkhead box protein P1	P58462	3.67945	3.26054	-0.209156	2.24361	1.23233	0.105132
Cbr1	Carbonyl reductase [NADPH] 1	P48758	0.395169	0.602901	-0.0119019	0.328723	0.180561	0.105137
Ankrd27	Ankyrin repeat domain-containing protein 27	Q3UMR0		-0.0541372	-0.110647	-0.082392	0.0282549	0.105158
Znf131	Zinc finger protein 131	Q8K3J5		-0.176298	-0.36065	-0.268474	0.0921762	0.105273
Scp2	Non-specific lipid-transfer protein	P32020	0.161147	0.11314	0.636066	0.303451	0.166884	0.105319
Hexa	Beta-hexosaminidase subunit alpha	P29416	0.138286	0.901134	0.254553	0.431325	0.237291	0.10537
Qsox1	Sulfhydryl oxidase 1	Q8BND5	-0.483261		-0.235921	-0.359591	0.12367	0.105439
Kif15	Kinesin-like protein KIF15	Q6P9L6	0.126638	-0.00190886	0.207936	0.110888	0.0610866	0.105571
Rnaseh1	Ribonuclease H1	O70338	-0.919763	-1.88617		-1.40297	0.483204	0.105581
Mecr	Trans-2-enoyl-CoA reductase, mitochondrial	Q9DCS3	-0.00849838	0.155837	0.131491	0.0929431	0.0512054	0.105584
Dvl1	Segment polarity protein dishevelled homolog DVL-1	P51141	0.682874	7.50757e-05	0.393906	0.358951	0.19788	0.105676
Cxadr	Coxsackievirus and adenovirus receptor homolog	P97792	-0.396932	-0.0450788	-0.133009	-0.191673	0.105722	0.105757
Fen1	Flap endonuclease 1	Q3TGH6	0.00347505	0.0660639	0.131613	0.0670508	0.0369936	0.105798
Cc2d1a	Coiled-coil and C2 domain-containing protein 1A	Q8K1A6	0.00260109	0.295647	0.527442	0.27523	0.151852	0.105799
Tuft1	Tuftelin	O08970	-0.00127487	0.207407	0.123442	0.109858	0.0606228	0.105826
Pdzd8	Putative uncharacterized protein	Q3UMB1	0.000703073	-0.0337398	-0.0546324	-0.029223	0.0161328	0.105888
Ndufv3	NADH dehydrogenase [ubiquinone] flavoprotein 3, mitochondrial	Q8BK30	0.447137	0.609347	2.47189	1.17613	0.649574	0.105953
Casc4	Protein CASC4	Q6P2L7	-0.610978	0.0245177	-0.446693	-0.344385	0.19045	0.106147
Cep57	Centrosomal protein of 57 kDa	Q8CEE0	-1.24823	-0.233833	-0.296632	-0.592899	0.328167	0.106277
Prpf19	Prp19 beta protein	Q4ADG5	-0.276703	-0.054314	-0.0630197	-0.131346	0.0727221	0.106324
Cnn3	Calponin-3	Q9DAW9	-0.00899696	-0.417112	-0.211792	-0.212633	0.117813	0.106431
Acox3	Putative uncharacterized protein	Q3TAW3	0.107619	1.01059	0.344169	0.487461	0.270333	0.106568
Setd1b	Histone-lysine N-methyltransferase SETD1B	Q8CFT2		-1.41037	-0.682314	-1.04634	0.364029	0.106573
Myo1e	Unconventional myosin-Ie	E9Q634	-0.135569	-0.631901	-0.131282	-0.299584	0.166163	0.106588
Arhgef25	Rho guanine nucleotide exchange factor 25	Q9CWR0	2.24101	0.273061	0.711571	1.07522	0.596486	0.106618
Amacr	Alpha-methylacyl-CoA racemase	O09174	0.0647286	0.600468	1.3522	0.672464	0.373399	0.106756
Arhgef10	Putative uncharacterized protein	Q3UGZ6	1.85743	0.340187	0.444967	0.880861	0.48922	0.106788
Pcmt1	Protein-L-isoaspartate(D-aspartate) O-methyltransferase	P23506	0.169943	0.0483656	0.0246996	0.0810027	0.0449918	0.106801
Vps52	Vacuolar protein sorting-associated protein 52 homolog	Q8C754	-0.539049	-0.0388318	-1.13928	-0.572387	0.318109	0.106888
Tob2	MKIAA1663 protein (Fragment)	Q80TA8	-0.996202	-0.516926	-0.0152987	-0.509476	0.283187	0.10691
U2af1	MCG14259, isoform CRA_a	Q14C24	-0.754812	-0.0858682	-0.246942	-0.362541	0.201572	0.106953
Phf6	PHD finger protein 6	Q9D4J7	0.00920905	-0.125552	-0.141373	-0.0859051	0.0477759	0.106993
Rmdn3	Regulator of microtubule dynamics protein 3	Q3UJU9	0.0165383	0.673555	0.332628	0.340907	0.189709	0.107084
Dhfr	Dihydrofolate reductase	P00375	0.276612	0.045442	0.684618	0.335557	0.186853	0.107181
Atp6v1h	V-type proton ATPase subunit H	Q8BVE3	-0.0317083	0.48686	0.426258	0.293803	0.163693	0.107265
Bnip3l	Putative uncharacterized protein	Q3TEW0	0.808179	0.212083	2.26853	1.09626	0.61087	0.107285
Bcl2l13	Bcl-2-like protein 13	P59017	0.0383452		0.0184376	0.0283914	0.00995383	0.107335
Ckb	Creatine kinase B-type	Q04447	1.16115	0.158402	0.340188	0.553246	0.308447	0.107365
Sav1	Protein salvador homolog 1	Q8VEB2	-2.62816	-2.72048	0.197015	-1.71721	0.957484	0.10738
Twf1	Twinfilin-1	Q91YR1	-0.0695416	-0.0312111	-0.00298016	-0.0345776	0.0192882	0.107446
Tmem214	Transmembrane protein 214	Q8BM55	0.132541	0.125704	0.618222	0.292156	0.163045	0.107514
Pdpr	Pyruvate dehydrogenase phosphatase regulatory subunit, mitochondrial	Q7TSQ8	-0.158555	2.08894	2.1788	1.36973	0.764582	0.107547
Idh3a	Isocitrate dehydrogenase [NAD] subunit alpha, mitochondrial	Q9D6R2	0.0538072	-0.00392314	0.0516601	0.0338481	0.0188958	0.107561
Cers2	Ceramide synthase 2	Q924Z4	-0.303164	-0.631831		-0.467498	0.164334	0.107597
Traf3ip2	Putative uncharacterized protein	Q8C0E5	-0.970363		-2.02623	-1.4983	0.527935	0.107835
Nsf	Vesicle-fusing ATPase	P46460	0.0215347	0.142062	0.038463	0.0673531	0.0376725	0.107852
App	Amyloid beta A4 protein	P12023	-0.648205		-0.310208	-0.479207	0.168999	0.107922
Atxn3	Ataxin 3	Q546X9	0.336899	1.02137	0.110012	0.489426	0.273916	0.107943
Hnrnpul2	Heterogeneous nuclear ribonucleoprotein U-like protein 2	Q00PI9	-0.00305422	0.110633	0.0707854	0.0594549	0.0333042	0.108076
Syf2	Pre-mRNA-splicing factor SYF2	Q9D198	0.0173873	-0.220481	-0.225091	-0.142728	0.0800687	0.108299
Mul1	Mitochondrial ubiquitin ligase activator of NFKB 1	Q8VCM5		0.066631	0.139686	0.103159	0.0365275	0.108326
Csnk2b	Casein kinase II subunit beta	P67871	0.52632	0.689378	-0.0378951	0.392601	0.220335	0.108361
Bcas3	Bcas3 protein	Q0VF62	0.742305	1.08081	-0.04338	0.593246	0.332975	0.108377
Luc7l3	Luc7-like protein 3	Q5SUF2	-0.125828	0.00129094	-0.224191	-0.116243	0.0652673	0.108431
Paf1	RNA polymerase II-associated factor 1 homolog	Q8K2T8	-0.111063	5.52134e-05	-0.0605807	-0.0571963	0.0321218	0.108466
Rai14	Ankycorbin	Q9EP71	0.027155	0.175498	0.046208	0.0829537	0.0465979	0.108501
Esco2	Putative uncharacterized protein (Fragment)	Q3TLK4	-0.79293	-0.857653	0.0647841	-0.5286	0.29728	0.108678
Rab11fip1	Rab11 family-interacting protein 1	E9Q8L9	-0.500515	-0.042337	-1.11718	-0.553343	0.311402	0.108779
Blvrb	Biliverdin reductase B (Flavin reductase (NADPH))	Q3U6G1	0.948372	-0.0651661	0.801365	0.561524	0.316205	0.108875
Ilkap	Integrin-linked kinase-associated serine/threonine phosphatase 2C	Q8R0F6	-0.0289915	-0.314356	-0.109136	-0.150828	0.0849742	0.108946
Phf5a	PHD finger-like domain-containing protein 5A	P83870	-0.187355	-0.11804	0.00539601	-0.0999997	0.0563688	0.109028
Arhgef5	Protein Arhgef5	E9Q7D5	-0.120295	0.0032407	-0.0747515	-0.0639354	0.0360695	0.109153
Pphln1	Periphilin-1	Q8K2H1	-0.136809	-0.203191	0.00817382	-0.110609	0.0624063	0.109167
Dna2	DNA replication ATP-dependent helicase/nuclease DNA2	Q6ZQJ5	-0.776102	-1.63832		-1.20721	0.431111	0.109179
Eif2s1	Eukaryotic translation initiation factor 2 subunit 1	Q6ZWX6	-0.221662	0.0145888	-0.179852	-0.128975	0.0727895	0.109211
Champ1	Chromosome alignment-maintaining phosphoprotein 1	Q8K327	-0.127487	-0.433025	-0.0548928	-0.205135	0.115856	0.109322
Kiaa1522	Uncharacterized protein KIAA1522	A2A7S8	0.814913	0.129066	0.207198	0.383726	0.21677	0.109356
Znhit1	Zinc finger HIT domain-containing protein 1	Q8R331	-2.79172	-0.716807	-8.00702	-3.83852	2.16861	0.10937
Thnsl1	Threonine synthase-like 1 (Bacterial)	Q149D1	1.37013	0.972908	-0.0679234	0.758371	0.428765	0.109482
Aldh3a2	Fatty aldehyde dehydrogenase	P47740	-0.0123886	0.158467	0.20828	0.11812	0.0668198	0.109568
N6amt2	N(6)-adenine-specific DNA methyltransferase 2	Q9CY45	6.44831	-0.177424	3.96706	3.41265	1.93267	0.109738
Il6st	Interleukin-6 receptor subunit beta	Q00560	-0.124559	0.00200139	-0.224324	-0.115627	0.0654871	0.109748
Hspb11	Heat shock protein beta-11	Q9D6H2	0.552217	0.260047		0.406132	0.146085	0.109909
Vapa	Vesicle-associated membrane protein-associated protein A	Q9WV55	-0.110706	-0.00802172	-0.0412814	-0.0533363	0.030249	0.109956
Xrcc6	X-ray repair cross-complementing protein 6	P23475	-0.0889102	-0.0107179	-0.214766	-0.104798	0.0594367	0.109962
Gpsm1	G-protein-signaling modulator 1	Q6IR34	0.0182013	0.617792	1.25921	0.631733	0.358315	0.109972
Mogs	Putative uncharacterized protein	Q3U026	0.0218229	-0.397388	-0.288627	-0.221397	0.125598	0.109999
Ano10	Anoctamin-10	Q8BH79	0.150022		0.318939	0.234481	0.0844582	0.110048
R3hcc1	R3H and coiled-coil domain-containing protein 1	Q8BSI6	0.351941	0.293904	1.59421	0.746685	0.424093	0.11018
Paics	Multifunctional protein ADE2	Q9DCL9	-0.125238	-0.00436723	-0.25982	-0.129809	0.0737784	0.110287
Frmd6	FERM domain-containing protein 6	Q8C0V9	1.82129	-0.00933879	0.979876	0.930609	0.529031	0.110317
Sepsecs	Putative uncharacterized protein	Q3U597	0.872857	0.100941	0.265026	0.412941	0.234786	0.110342
Map2k1	Dual specificity mitogen-activated protein kinase kinase 1	P31938	-0.275299	-0.343078	0.0238323	-0.198182	0.112718	0.110394
Crip1	Cysteine-rich protein 1	P63254	1.21718	0.570047		0.893616	0.323569	0.110582
Cul2	MKIAA4106 protein (Fragment)	Q571A2	-0.108341	0.00530167	-0.074341	-0.0591266	0.0336761	0.110608
Timm50	Mitochondrial import inner membrane translocase subunit TIM50	Q9D880	-0.287533	-0.0684934	-0.821175	-0.392401	0.223518	0.110624
Dr1	Putative uncharacterized protein	Q3UMQ2	0.158881		0.0743387	0.11661	0.0422709	0.110698
Pptc7	Protein phosphatase PTC7 homolog	Q6NVE9	0.55843		0.261218	0.409824	0.148606	0.110728
Slc25a20	Solute carrier family 25 (Mitochondrial carnitine/acylcarnitine translocase), member 20	Q7TPW6	0.0179902	0.124244	0.315019	0.152418	0.0868943	0.110756
Suz12	Suz12 protein (Fragment)	Q5XG68	-0.133182	0.0116658	-0.169251	-0.0969224	0.0552835	0.110832
Tgif2	Homeobox protein TGIF2	Q3TZS1	-1.59257		-0.74389	-1.16823	0.424339	0.110904
Sh2b1	SH2B adapter protein 1	Q91ZM2	0.484453	-0.00347353	0.920735	0.467238	0.266935	0.111078
Atp6v0a2	V-type proton ATPase 116 kDa subunit a isoform 2	P15920	-0.923939	-1.14322	0.0838677	-0.661098	0.377823	0.111133
Pxn	Paxillin	Q8VI36	0.799072	0.0726599	0.267314	0.379682	0.217093	0.111205
Necap1	NECAP endocytosis associated 1	Q0VB06	0.0315282	0.439563	0.160584	0.210559	0.120411	0.111228
Lsm3	U6 snRNA-associated Sm-like protein LSm3	P62311	0.500596	0.979072	0.000708229	0.493459	0.282452	0.11137
Ccdc174	Coiled-coil domain-containing protein 174	Q3U155	0.51232	-0.0262369	0.349794	0.278626	0.159488	0.111375
Lrrc57	Leucine rich repeat containing 57	Q8JZX5	2.01672	0.200626	0.645189	0.954177	0.54655	0.111479
Psma5	Proteasome subunit alpha type	Q3TUI9	-0.0311564	-0.328891	-0.107383	-0.15581	0.0892941	0.11156
Foxj3	Forkhead box protein J3	Q3TAY5	0.597514		0.277152	0.437333	0.160181	0.111756
Aldh16a1	Aldehyde dehydrogenase family 16 member A1	Q571I9	0.372602	0.0484892	0.102612	0.174568	0.100242	0.111864
Dcaf15	DDB1- and CUL4-associated factor 15	Q6PFH3	-1.01283		-0.469177	-0.741004	0.271827	0.111916
Rplp0	60S acidic ribosomal protein P0	P14869	-0.348755	0.0226222	-0.256493	-0.194208	0.111639	0.112028
Ung	Uracil-DNA glycosylase	P97931	0.74893		1.61872	1.18383	0.434895	0.112064
Zgpat	Zinc finger CCCH-type with G patch domain-containing protein	Q8VDM1	-1.11617	-0.433031	-0.0617492	-0.536983	0.30879	0.112083
Tor3a	Torsin-3A	Q9ER38	5.93777	0.0401501	2.89434	2.95742	1.70279	0.112277
Vps53	Putative uncharacterized protein	Q3TJT1	-0.00375453	0.526556	0.275121	0.265974	0.153156	0.112293
Setd2	Protein Setd2	E9Q5F9	-0.155913	-0.802362	-0.159775	-0.372683	0.214842	0.112466
Dcaf5	Putative uncharacterized protein	Q3UV57		0.233465	0.506488	0.369976	0.136512	0.112515
Psme4	Proteasome activator complex subunit 4	Q5SSW2	-0.28225	-0.00299928	-0.577502	-0.287584	0.165866	0.112542
Shkbp1	SH3KBP1-binding protein 1	Q6P7W2		0.760684	0.350322	0.555503	0.205181	0.112624
Lactb2	Beta-lactamase-like protein 2	Q99KR3	0.213034		0.0980657	0.15555	0.057484	0.112678
Gins2	DNA replication complex GINS protein PSF2	Q9D600	1.07943	0.214077	0.209054	0.500853	0.289291	0.112768
Map3k2	Mitogen-activated protein kinase kinase kinase 2	Q61083	1.23083	0.612191	0.000957202	0.614659	0.355035	0.112772
Phf2	Lysine-specific demethylase PHF2	Q9WTU0	-1.45821	-0.869637	0.0503021	-0.759182	0.438958	0.112929
Smyd3	Putative uncharacterized protein	Q3TIF7	0.067189		0.146321	0.106755	0.039566	0.112977
Gas2	Growth arrest-specific protein 2	P11862	0.63503	0.29159		0.46331	0.17172	0.112981
Micall1	MICAL-like protein 1	Q8BGT6	0.416907	-0.0350637	0.345994	0.242613	0.140339	0.112997
Tmem41b	Transmembrane protein 41B	Q8K1A5	0.368398	0.0762345	0.0677987	0.17081	0.0988237	0.113026
Myo9a	Unconventional myosin-IXa	Q8C170	0.124826	0.325697	0.0175702	0.156031	0.0903065	0.113083
Micu3	Calcium uptake protein 3, mitochondrial	Q9CTY5	-0.992157		-2.16258	-1.57737	0.585212	0.113084
Rnaseh2c	Ribonuclease H2 subunit C	Q9CQ18	3.50763	-0.359647	4.28686	2.47828	1.43668	0.113334
Pan3	Pan3 protein	Q5U221	0.684675	0.206293	0.0714502	0.320806	0.186052	0.113399
Asb6	Ankyrin repeat and SOCS box-containing protein 6	Q6BCN6	0.489764	-0.0512044	0.524644	0.321068	0.186408	0.11357
Usp10	Ubiquitin carboxyl-terminal hydrolase 10	P52479	-0.196424	0.00316932	-0.104331	-0.0991953	0.0576748	0.113795
Eed	Polycomb protein EED	Q921E6	-0.988138	0.034513	-0.579085	-0.510903	0.297176	0.113859
Rabggtb	Geranylgeranyl transferase type-2 subunit beta	P53612	-0.022549	-0.0239475	-0.120287	-0.0555946	0.0323489	0.113914
Gprc5b	G-protein coupled receptor family C group 5 member B	Q923Z0	-0.878606	-0.399717		-0.639162	0.239444	0.114095
Zranb2	Zinc finger Ran-binding domain-containing protein 2	Q9R020	1.75961	0.0685807	0.709324	0.845839	0.492908	0.114148
Kirrel	Kin of IRRE-like protein 1	Q80W68	0.0139143	0.230845	0.53838	0.261046	0.152151	0.114176
[truncated: 5,298 more rows]

## Sheet: SILAC 48h
Table S3
Gene Symbol	Protein Name	UniProt Accession	Repeat 1 (log2 ratio(H/L)	Repeat 2 (log2 ratio(H/L)	Repeat 3 (log2 ratio(H/L)	mean	std err	p value
Col5a1	Collagen alpha-1(V) chain	O88207	-0.36483	-0.364365	-0.360961	-0.363385	0.00121945	5.63064e-06
Ndufa10	NADH dehydrogenase [ubiquinone] 1 alpha subcomplex subunit 10, mitochondrial	Q99LC3	0.283455	0.286232	0.283135	0.284274	0.000983337	5.98264e-06
Gm17415	Protein Gm17415	F6YI27	-5.0632		-5.0634	-5.0633	9.81681e-05	6.17144e-06
Dctn1	Dynactin subunit 1	O08788	0.27799	0.279611	0.28272	0.280107	0.00138789	1.22748e-05
Wdr62	WD repeat-containing protein 62	Q3U3T8	0.443468	0.445573	0.436231	0.441757	0.00282906	2.0505e-05
Ivd	Isovaleryl-CoA dehydrogenase, mitochondrial	Q9JHI5	0.498286	0.488057	0.504344	0.496896	0.00475266	4.57355e-05
Eif5	Eukaryotic translation initiation factor 5	P59325	-0.220054	-0.213954	-0.21273	-0.215579	0.00226527	5.51978e-05
Psme2	Proteasome activator complex subunit 2	P97372	0.791147	0.82521	0.798773	0.805043	0.0103208	8.21583e-05
Hook3	Protein Hook homolog 3	Q8BUK6	0.0527778	0.0553554	0.05292	0.0536844	0.000836507	0.000121354
Csad	Cysteine sulfinic acid decarboxylase	Q8K566	0.473361	0.456513	0.446588	0.458821	0.00781439	0.000144972
Ugdh	UDP-glucose 6-dehydrogenase	O70475	0.462843	0.488998	0.46259	0.471477	0.00876078	0.000172548
Krt17	Keratin, type I cytoskeletal 17	Q9QWL7	-5.44668	-5.40459	-5.1151	-5.32212	0.104223	0.000191636
Heatr1	HEAT repeat containing 1	G3X9B1	-0.511425	-0.549734	-0.525653	-0.528937	0.0111799	0.000223229
Rrp36	Ribosomal RNA processing protein 36 homolog	Q3UFY0	-0.949025	-0.962913	-1.01973	-0.977224	0.0216295	0.000244768
Cox6c	Cytochrome c oxidase subunit 6C	Q9CPQ1	0.462613	0.434464	0.466908	0.454661	0.0101747	0.000250213
Micall1	MICAL-like protein 1	Q8BGT6	0.658448	0.634788	0.609103	0.634113	0.0142488	0.000252269
Rps15	40S ribosomal protein S15	P62843	-0.150941	-0.159829	-0.163265	-0.158011	0.00367183	0.000269778
Anxa6	Annexin A6	P14824	0.844097	0.841806	0.782869	0.822924	0.0200383	0.000296202
Bap18	Chromatin complexes subunit BAP18	Q9DCT6	-1.02225	-1.0967	-1.01849	-1.04581	0.0254666	0.000296222
Scrn2	Secernin-2	Q8VCA8	0.369361	0.345345	0.374919	0.363209	0.00907465	0.000311825
Rad23b	UV excision repair protein RAD23 homolog B	P54728	-0.279185	-0.270402	-0.255705	-0.268431	0.0068495	0.000325237
Ptrf	Polymerase I and transcript release factor	O54724	-0.488419	-0.498484	-0.531354	-0.506086	0.012964	0.000327772
Ptpn23	Tyrosine-protein phosphatase non-receptor type 23	Q6PB44	0.519855	0.476563	0.508394	0.501604	0.0129501	0.000332933
Snx27	Sorting nexin-27	Q3UHD6	0.0935906	0.100973	0.101528	0.0986973	0.00255836	0.000335618
Usp48	Ubiquitin carboxyl-terminal hydrolase 48	Q3V0C5	-0.262772	-0.287651	-0.271413	-0.273945	0.00729286	0.000353978
Nucb1	Nucleobindin-1	Q02819	-0.220004	-0.240926	-0.235555	-0.232162	0.00627335	0.00036468
Aco2	Aconitate hydratase, mitochondrial	Q99KI0	0.305572	0.33296	0.330458	0.322997	0.00874216	0.000365876
Lmnb2	Lamin-B2	P21619	0.383552	0.349849	0.361091	0.364831	0.00990707	0.000368297
Nudt12	Putative uncharacterized protein	Q3UGL8	1.13876	1.25407	1.22414	1.20566	0.0345452	0.000409981
Kntc1	Kinetochore-associated protein 1	Q8C3Y4	0.482936	0.467914	0.437482	0.462777	0.0133704	0.000416842
Erp29	Endoplasmic reticulum resident protein 29	P57759	0.248831	0.251615	0.272925	0.25779	0.00760976	0.000435123
Prpf3	Putative uncharacterized protein	Q3UT19	-0.218523	-0.23846	-0.240505	-0.232496	0.00701138	0.000454104
Rangrf	Ran guanine nucleotide release factor	Q9JIB0	-2.26259	-2.13281	-2.03837	-2.14459	0.0649938	0.000458594
Pdcd11	Protein RRP5 homolog	Q6NS46	-0.571981	-0.518411	-0.526187	-0.53886	0.0167121	0.000480234
Rrp1	Ribosomal RNA processing protein 1 homolog A	P56183	-0.762044	-0.801934	-0.719168	-0.761049	0.0238977	0.000492286
Lgals9	Galectin-9	O08573	0.716424	0.644527	0.701098	0.687349	0.0218637	0.00050513
Pak1ip1	Putative uncharacterized protein (Fragment)	Q3UX26	-0.571997	-0.605702	-0.542419	-0.573373	0.0182812	0.000507507
Prr11	Proline-rich protein 11	Q8BHE0	0.727569	0.749385	0.809358	0.762104	0.0244521	0.000513928
Myo6	Unconventional myosin-VI	E9PVU0	0.805281	0.72475	0.800684	0.776905	0.0261113	0.000563841
Usp8	Ubiquitin carboxyl-terminal hydrolase (Fragment)	Q3UQ26	0.445334	0.476859	0.424513	0.448902	0.0152158	0.000573471
Cyp51a1	Lanosterol 14-alpha demethylase	Q8K0C4	-0.709909	-0.798115	-0.780456	-0.762827	0.0269452	0.000622688
Hspg2	Basement membrane-specific heparan sulfate proteoglycan core protein	B1B0C7	-0.480694	-0.45165	-0.425025	-0.452456	0.0160753	0.000629962
Csrp1	Cysteine and glycine-rich protein 1	P97315	0.534558	0.605405	0.573081	0.571015	0.0204777	0.000641804
Cisd3	CDGSH iron-sulfur domain-containing protein 3, mitochondrial	B1AR13	1.29922	1.37447	1.47179	1.38183	0.0499527	0.000652124
Hsd17b10	17beta-hydroxysteroid dehydrogenase type 10/short chain L-3-hydroxyacyl-CoA dehydrogenase	Q99N15	0.375079	0.337414	0.378902	0.363798	0.0132384	0.000660779
Etfb	Electron transfer flavoprotein subunit beta	Q9DCW4	0.505164	0.561257	0.568084	0.544835	0.0199332	0.000667916
Umps	Uridine 5'-monophosphate synthase	P13439	0.113415	0.107714	0.0994933	0.106874	0.00404061	0.000713164
Fem1b	Protein fem-1 homolog B	Q9Z2G0	-0.56484		-0.567381	-0.566111	0.0012705	0.00071437
Mlkl	Mixed lineage kinase domain-like protein	Q9D2Y4	0.319794	0.287237	0.324707	0.310579	0.0117571	0.000714975
Smndc1	Survival of motor neuron-related-splicing factor 30	Q8BGT7	-0.646528	-0.587328	-0.571005	-0.60162	0.0229428	0.000725558
Acadl	Long-chain specific acyl-CoA dehydrogenase, mitochondrial	P51174	0.639837	0.56643	0.635519	0.613929	0.023782	0.000748607
Impdh2	Inosine-5'-monophosphate dehydrogenase 2	P24547	-0.900477	-0.95053	-0.830586	-0.893864	0.0347824	0.000755374
Sqle	Squalene monooxygenase	P52019	-1.15445	-1.11328	-1.0102	-1.09264	0.0429009	0.000769033
Slc4a7	Sodium bicarbonate cotransporter 3	Q8BTY2	-0.22184	-0.219738	-0.195793	-0.212457	0.00835402	0.000771281
Etf1	Putative uncharacterized protein	Q3TDF8	-0.244793	-0.246565	-0.27593	-0.255763	0.0100966	0.000777372
Chkb	Choline/ethanolamine kinase	O55229		0.770033	0.774046	0.77204	0.00200638	0.000827222
Fnbp1l	Formin-binding protein 1-like	Q8K012	0.296158	0.31391	0.34063	0.316899	0.0129248	0.000829648
Esf1	ESF1 homolog	Q3V1V3	-0.662153	-0.653963	-0.74248	-0.686198	0.0282399	0.000844686
Adk	Adenosine kinase	P55264	0.485956	0.545692	0.557026	0.529558	0.0220451	0.000864251
Ssrp1	Ssrp1 protein (Fragment)	Q05DR5	-0.0989027	-0.102904	-0.0892271	-0.0970113	0.0040599	0.000873409
Wdr46	WD repeat-containing protein 46	Q9Z0H1	-0.806559	-0.740838	-0.857148	-0.801515	0.0336702	0.000880017
Rrp8	Putative uncharacterized protein	Q3U4B0	-0.629582	-0.644092	-0.720454	-0.66471	0.0281855	0.000896578
Got2	Aspartate aminotransferase, mitochondrial	P05202	0.235382	0.258286	0.223668	0.239112	0.0101658	0.000901306
Ergic3	Endoplasmic reticulum-Golgi intermediate compartment protein 3	Q9CQE7	0.402982		0.400694	0.401838	0.00114393	0.000906146
Atxn10	Ataxin-10	P28658	-0.496305	-0.45891	-0.428103	-0.461106	0.0197187	0.000911877
Ap2a1	AP-2 complex subunit alpha-1	P17426	0.290922	0.336106	0.324792	0.317273	0.0135744	0.00091275
Gm16286	Putative uncharacterized protein	Q3TBP4		-5.82139	-5.78762	-5.8045	0.0168876	0.000926087
Zfpm2	Zinc finger protein ZFPM2	Q8CCH7	-0.967682	-1.10133	-0.972186	-1.01373	0.0438171	0.000931526
Fyco1	FYVE and coiled-coil domain-containing protein 1	Q8VDC1	0.543578	0.481472	0.555859	0.52697	0.0230234	0.000951687
Bccip	BRCA2 and CDKN1A-interacting protein	Q9CWI3	-0.218574	-0.191213	-0.219985	-0.209924	0.00936416	0.000991949
Prdx2	Prdx2 protein	Q5M9N9	0.278591	0.274262	0.241126	0.264659	0.011833	0.000996525
Ikbkg	NF-kappa-B essential modulator	O88522	0.577605	0.535869	0.493627	0.5357	0.0242426	0.00102083
Capg	Putative uncharacterized protein	Q3TNN6	0.821406	0.831669	0.94503	0.866035	0.0396086	0.0010426
Mb21d1	Putative uncharacterized protein (Fragment)	Q8BNZ9	0.465684	0.412849	0.48236	0.453631	0.0209514	0.00106317
Mki67ip	MKI67 FHA domain-interacting nucleolar phosphoprotein	Q91VE6	-0.787846	-0.671357	-0.747754	-0.735652	0.0341676	0.00107511
Zfpl1	Zinc finger protein-like 1	Q9DB43		0.403764	0.406515	0.405139	0.0013754	0.00108062
Myof	Myoferlin	Q69ZN7	0.227417	0.222743	0.195039	0.215067	0.0101042	0.00109999
Npc2	Putative uncharacterized protein	Q3TXQ4	0.547039	0.523377	0.465705	0.51204	0.0241535	0.00110885
Mdh1	Malate dehydrogenase, cytoplasmic	P14152	0.345765	0.315841	0.372356	0.344654	0.016324	0.00111788
Smn1	Survival motor neuron protein	P97801	-0.446655	-0.447687	-0.514059	-0.469467	0.0222978	0.00112413
Wdr55	WD repeat-containing protein 55	Q9CX97	-0.235807	-0.27625	-0.268312	-0.260123	0.012372	0.00112725
Mrpl50	39S ribosomal protein L50, mitochondrial	Q8VDT9	-0.495068	-0.421266	-0.475495	-0.463943	0.0220738	0.00112804
Mkln1	Muskelin	O89050	-0.963847	-0.900748	-0.816963	-0.893853	0.0425418	0.00112875
Ctnna1	Catenin alpha-1	P26231	-0.0707938	-0.082615	-0.081159	-0.0781893	0.00372153	0.00112888
Agl	Protein Agl	F8VPN4	0.565703	0.605058	0.666506	0.612422	0.0293313	0.00114298
Rpl7	60S ribosomal protein L7	P14148	-0.353431	-0.307636	-0.359696	-0.340254	0.0164092	0.00115884
Vps35	Putative uncharacterized protein	Q3TJ43	0.171354	0.177882	0.151138	0.166791	0.00805014	0.00116069
Zfand5	AN1-type zinc finger protein 5	O88878		-0.77847	-0.784216	-0.781343	0.00287314	0.00117048
Prdx4	Peroxiredoxin-4	O08807	0.665219	0.562469	0.606996	0.611561	0.029749	0.00117896
Nol6	Nucleolar protein 6	Q8R5K4	-0.483946	-0.56965	-0.551317	-0.534971	0.0260558	0.00118189
Ror2	Putative uncharacterized protein	Q3TZP9	0.48336	0.462395	0.409072	0.451609	0.0221126	0.00119444
Plgrkt	Plasminogen receptor (KT)	Q9D3P8	1.31251	1.3154	1.12953	1.25248	0.0614779	0.00120033
Mcam	Cell surface glycoprotein MUC18	Q8R2Y2	1.37949	1.38014	1.594	1.45121	0.0713958	0.00120582
Gdi1	Rab GDP dissociation inhibitor alpha	P50396	0.69004	0.703609	0.598733	0.664127	0.0329309	0.00122483
Erdr1	Erdr1 protein	Q6PED5	-1.12769	-0.987214	-1.16691	-1.09394	0.0545498	0.00123867
Baz1a	Bromodomain adjacent to zinc finger domain protein 1A	O88379	-0.27209	-0.276523	-0.235379	-0.261331	0.0130388	0.00124007
D8Ertd738e	Leydig cell tumor 10 kDa protein homolog	Q8R1F0	-0.963432		-0.95584	-0.959636	0.00379595	0.0012591
Pvrl2	Poliovirus receptor-related protein 2	P32507	0.734288	0.835007	0.871175	0.81349	0.0409544	0.00126247
Tbcd	Tubulin-specific chaperone D	Q8BYA0	0.393947	0.336683	0.393022	0.37455	0.0189358	0.00127308
Itga7	Putative uncharacterized protein	Q3TZS3	0.865667	0.884688	0.746463	0.832273	0.0432549	0.0013451
Adh5	Alcohol dehydrogenase class-3	P28474	0.0999035	0.10924	0.119633	0.109592	0.00569809	0.00134621
Rnh1	Putative uncharacterized protein	Q3UM23	0.298082	0.283559	0.337189	0.306277	0.0160148	0.00136147
Adprh	[Protein ADP-ribosylarginine] hydrolase	P54923		-0.162591	-0.161205	-0.161898	0.000692877	0.00136226
Impa1	Inositol monophosphatase 1	O55023	0.424318	0.392855	0.353675	0.390283	0.0204334	0.00136493
S100a8	Protein S100-A8	P27005	-7.13641	-5.95018	-6.47058	-6.51906	0.343291	0.00138078
Exoc6b	Exocyst complex component 6B	A6H5Z3	-0.0706643	-0.0779849	-0.0849586	-0.0778693	0.00412682	0.00139844
Psme3	Proteasome activator complex subunit 3	P61290	-0.434989	-0.362054	-0.394625	-0.397222	0.0210945	0.00140414
Bnip2	Putative uncharacterized protein	Q9D632	-0.366713	-0.416289	-0.349334	-0.377445	0.0200594	0.00140625
Hadha	Trifunctional enzyme subunit alpha, mitochondrial	Q8BMS1	0.28923	0.332129	0.279647	0.300336	0.0161358	0.00143702
Rpl7l1	Putative uncharacterized protein (Fragment)	Q3U8B9	-1.04625	-0.867526	-0.952807	-0.955529	0.051612	0.00145241
Rrp12	Putative uncharacterized protein	Q3UJA1	-0.672643	-0.804065	-0.703897	-0.726868	0.0396386	0.00148035
Capn1	Calpain-1 catalytic subunit	O35350	0.449566	0.37536	0.39482	0.406582	0.0222139	0.00148588
Gaa	Lysosomal alpha-glucosidase	P70699	0.763242	0.662068	0.796926	0.740746	0.0405224	0.00148963
Mettl1	tRNA (guanine-N(7)-)-methyltransferase	Q9Z120	-0.53785	-0.493692	-0.444495	-0.492012	0.0269624	0.00149481
Ubtf	Nucleolar transcription factor 1	P25976	-0.443551	-0.489256	-0.53693	-0.489912	0.0269582	0.00150712
Fbxo30	F-box only protein 30	Q8BJL1	-0.323518	-0.389808	-0.344908	-0.352745	0.0195334	0.0015262
Cnpy2	Protein canopy homolog 2	Q9QXT0	0.518338	0.461956	0.428695	0.469663	0.0261632	0.00154442
Rai14	Ankycorbin	Q9EP71	0.190392	0.228687	0.200016	0.206365	0.0115016	0.00154596
Rpf2	Ribosome production factor 2 homolog	Q9JJ80	-0.75635	-0.636149	-0.650027	-0.680842	0.0379659	0.00154755
Serinc1	Putative uncharacterized protein (Fragment)	Q8C5F9	-0.388024	-0.365678	-0.32001	-0.357904	0.020015	0.00155638
Hexb	Beta-hexosaminidase subunit beta	P20060	0.975708	0.803092	0.904581	0.89446	0.0500863	0.00156045
Ivns1abp	Influenza virus NS1A-binding protein homolog	Q920Q8	-1.28189	-1.05938	-1.229	-1.19009	0.0671135	0.00158257
Prkag1	5'-AMP-activated protein kinase subunit gamma-1	O54950	-0.212513	-0.252656	-0.214676	-0.226615	0.0130353	0.0016462
Rars	Arginine--tRNA ligase, cytoplasmic	Q9D0I9	0.152941	0.132547	0.126738	0.137409	0.00794514	0.00166331
Acsf2	Acyl-CoA synthetase family member 2, mitochondrial	Q8VCW8	0.992454	1.20031	1.04418	1.07898	0.062474	0.00166787
Dars2	Aspartate--tRNA ligase, mitochondrial	Q8BIP0	0.527949	0.456335	0.556273	0.513519	0.0297381	0.00166842
Hadhb	Trifunctional enzyme subunit beta, mitochondrial	Q99JY0	0.427226	0.354116	0.419835	0.400392	0.0232364	0.00167551
Polr3f	Putative uncharacterized protein	Q8C108	-0.23466	-0.281271	-0.240367	-0.252099	0.0146787	0.00168655
Pgd	6-phosphogluconate dehydrogenase, decarboxylating	Q3UAG2	0.341102	0.298912	0.365843	0.335286	0.0195388	0.00168938
Krr1	KRR1 small subunit processome component homolog	Q8BGA5	-0.389719	-0.451457	-0.47571	-0.438962	0.0255977	0.00169164
Elavl1	ELAV-like protein 1	P70372	-0.28008	-0.26974	-0.325329	-0.291717	0.0170694	0.00170319
Ppp2r5a	Putative uncharacterized protein (Fragment)	Q3ULN8		-0.193477	-0.195567	-0.194522	0.001045	0.00170998
Glipr2	Golgi-associated plant pathogenesis-related protein 1	Q9CYL5	0.951092	0.826217	0.783625	0.853645	0.050251	0.00172367
Psat1	Phosphoserine aminotransferase	Q3U6K9	-0.33355	-0.272093	-0.315122	-0.306922	0.0182088	0.00175062
Snap47	Synaptosomal-associated protein 47	Q8R570	0.344043	0.349707	0.412606	0.368785	0.0219712	0.00176533
Rpl31	60S ribosomal protein L31	P62900	-0.344538	-0.319565	-0.391185	-0.351763	0.0209883	0.00177056
Kti12	Protein KTI12 homolog	Q9D1R2	-0.632357	-0.594517	-0.72525	-0.650708	0.0388388	0.0017718
Pcolce	Putative uncharacterized protein	Q3TX39	-0.844343	-1.04219	-0.944588	-0.943705	0.0571141	0.0018214
Aldh18a1	Putative uncharacterized protein	Q3TWN8	0.363876	0.378664	0.308604	0.350381	0.0213204	0.0018411
Dnaja1	DnaJ homolog subfamily A member 1	P63037	-0.166688	-0.164768		-0.165728	0.000959935	0.0018437
Eif4a1	Eukaryotic initiation factor 4A-I	P60843	-0.345783	-0.372795	-0.425316	-0.381298	0.0233497	0.00186452
Hdhd2	Haloacid dehalogenase-like hydrolase domain-containing protein 2	Q3UGR5	0.476218	0.418931	0.51854	0.47123	0.0288623	0.00186523
Foxo1	Forkhead box protein O1	Q9R1E0		-1.47292	-1.45571	-1.46431	0.00860839	0.00187125
Kiaa0020	Pumilio domain-containing protein KIAA0020	Q8BKS9	-1.31138	-1.05919	-1.17174	-1.18077	0.0729417	0.00189721
Rabl5	Rab-like protein 5	Q9DAI2	0.714661	0.597865	0.732064	0.68153	0.0421331	0.00190005
Bysl	Bystin	O54825	-0.535182	-0.477871	-0.592766	-0.535273	0.0331672	0.00190873
Bop1	Ribosome biogenesis protein BOP1	P97452	-0.453327	-0.369248	-0.440748	-0.421108	0.0261826	0.00192177
Ctdsp2	Ctdsp2 protein (Fragment)	Q5EBQ9		-0.577454	-0.570445	-0.573949	0.00350439	0.00194349
Ndufb8	NADH dehydrogenase [ubiquinone] 1 beta subcomplex subunit 8, mitochondrial	Q9D6J5	0.560126	0.694932	0.656855	0.637304	0.0401241	0.00197021
Lonp1	Lon protease homolog, mitochondrial	Q8CGK3	0.50298	0.408951	0.430765	0.447565	0.028414	0.00200311
Rps4x	40S ribosomal protein S4, X isoform	P62702	-0.225113	-0.234505	-0.276429	-0.245349	0.0157747	0.00205419
Dck	Deoxycytidine kinase	P43346	0.85003	1.0106	0.827214	0.895949	0.0577037	0.0020612
Cdc42bpb	Serine/threonine-protein kinase MRCK beta	Q7TT50	0.31182	0.31632	0.256966	0.295036	0.019079	0.00207786
Uck2	Uridine kinase	Q543C2	-0.601738	-0.751248	-0.658859	-0.670615	0.0435583	0.00209618
Akt1	RAC-alpha serine/threonine-protein kinase	P31750		-0.107247	-0.10867	-0.107958	0.000711495	0.00209778
Sorcs2	MKIAA1329 protein (Fragment)	Q8CHA4	-0.490599	-0.607938	-0.594421	-0.564319	0.0370662	0.00214327
Ap1m1	AP-1 complex subunit mu-1	P35585	0.375938	0.29886	0.346399	0.340399	0.0224519	0.00216111
Rcn3	Reticulocalbin-3	Q8BH97	0.628008	0.692329	0.549684	0.62334	0.0412443	0.00217473
Spag5	Sperm-associated antigen 5	Q7TME2	0.718876	0.578498	0.613159	0.636844	0.0422185	0.00218302
U2af1	MCG14259, isoform CRA_a	Q14C24	-0.101714	-0.102885	-0.124292	-0.10963	0.00733851	0.00222546
Atp6v1d	V-type proton ATPase subunit D	P57746	0.186308	0.229732	0.191995	0.202678	0.0136261	0.00224472
Arhgap21	Rho GTPase-activating protein 21	Q6DFV3	-1.23661	-0.995538	-1.2179	-1.15002	0.077429	0.00225126
Utp11l	Probable U3 small nucleolar RNA-associated protein 11	Q9CZJ1	-0.741326	-0.592731	-0.634516	-0.656191	0.0442433	0.00225765
Plod1	Putative uncharacterized protein	Q3UE11	0.632684	0.502742	0.550956	0.562127	0.0379248	0.00226045
Atp5h	ATP synthase subunit d, mitochondrial	Q9DCX2	0.319459	0.265145	0.25963	0.281412	0.0190903	0.00228521
Rpa2	Replication protein A 32 kDa subunit	Q3TE40	0.471376	0.422742	0.534517	0.476212	0.0323573	0.00229255
Cnp	2',3'-cyclic-nucleotide 3'-phosphodiesterase	P16330	0.652582	0.745048	0.827049	0.74156	0.0503944	0.00229323
Colgalt1	Procollagen galactosyltransferase 1	Q8K297	0.403592	0.339106	0.324961	0.355886	0.0241997	0.00229598
Pgm3	Putative uncharacterized protein	Q3TFH8	0.699279	0.61623	0.781948	0.699152	0.0478386	0.00232459
Rpa1	Putative uncharacterized protein	Q3U8B3	0.462467	0.578168	0.489698	0.510111	0.0349247	0.00232738
Rbm19	Probable RNA-binding protein 19	Q8R3C6	-0.694523	-0.576566	-0.726574	-0.665887	0.0456092	0.00232933
Ccdc47	Coiled-coil domain containing 47	Q0VBU4	0.198586	0.169243	0.214782	0.194204	0.0133273	0.00233821
Anp32a	Acidic leucine-rich nuclear phosphoprotein 32 family member A	O35381	-0.26159	-0.223054	-0.28309	-0.255912	0.0175622	0.00233825
Polr1c	DNA-directed RNA polymerases I and III subunit RPAC1	P52432	-0.504714	-0.594656	-0.640654	-0.580008	0.0399199	0.00235185
Gxylt1	Glucoside xylosyltransferase 1	Q3UHH8	0.627686	0.494725	0.585424	0.569279	0.0392224	0.00235673
Fdft1	Squalene synthase	P53798	-1.70312	-1.3388	-1.55504	-1.53232	0.105782	0.00236592
Rrp7a	Putative uncharacterized protein	Q3U5H9	-0.363228	-0.422186	-0.462122	-0.415845	0.028724	0.00236865
Denr	Density-regulated protein	Q9CQJ6	0.223476	0.257257	0.284654	0.255129	0.0176928	0.0023874
Noc2l	Nucleolar complex protein 2 homolog	Q9WV70	-0.538196	-0.598206	-0.683189	-0.60653	0.0420624	0.00238744
Dab2	Disabled homolog 2	P98078	-0.611628	-0.718126	-0.569658	-0.633137	0.0441876	0.00241777
Tax1bp1	Tax1-binding protein 1 homolog	Q3UKC1	-0.939106	-0.745842	-0.796896	-0.827281	0.0578222	0.00242485
Sod1	Superoxide dismutase [Cu-Zn]	P08228	0.358082	0.376578	0.29678	0.343813	0.0241152	0.00244184
Gspt1	Putative uncharacterized protein (Fragment)	Q8BPH0	-0.160422	-0.197436	-0.201712	-0.186523	0.0131089	0.00245152
Hist1h4a	Histone H4	P62806	-0.638732	-0.794044	-0.656874	-0.69655	0.0490275	0.00245885
Anxa8	Annexin A8	O35640	0.499299	0.634516	0.60483	0.579549	0.0410296	0.00248733
Dld	Dihydrolipoyl dehydrogenase, mitochondrial	O08749	0.214248	0.16727	0.197699	0.193072	0.0137574	0.00251948
Eif4g2	Eukaryotic translation initiation factor 4 gamma 2	Q62448	-0.309051	-0.243128	-0.264542	-0.27224	0.0194157	0.0025239
Selo	Selenoprotein O	Q9DBC0	-0.768657	-0.89189	-0.699663	-0.786737	0.0562226	0.00253409
Orc2	Origin recognition complex, subunit 2-like (S. cerevisiae)	Q543F8	-0.891677		-0.905998	-0.898838	0.00716084	0.00253585
Hist1h1a	Histone H1.1	P43275	-1.83951	-1.52743	-1.95257	-1.77317	0.12713	0.00255053
Pdcd2l	Programmed cell death protein 2-like	Q8C5N5	-0.508634	-0.575483	-0.448412	-0.510843	0.036699	0.00256069
Vps29	Vacuolar protein sorting-associated protein 29	Q9QZ88	0.279003	0.222081	0.231389	0.244158	0.0176285	0.00258632
Igf2r	Cation-independent mannose-6-phosphate receptor	Q07113	0.324633	0.278604	0.358886	0.320708	0.0232584	0.00260916
Ube2c	Putative uncharacterized protein	Q3UWQ1	-0.300374	-0.336042	-0.386196	-0.34087	0.0248919	0.00264516
Fem1c	Protein fem-1 homolog C	Q8CEF1	-1.28226	-1.0437	-1.0291	-1.11835	0.0820591	0.00267039
Dlgap5	Putative uncharacterized protein	Q3UX88	0.378867	0.485077	0.412192	0.425379	0.031361	0.00269572
Rad21	Putative uncharacterized protein	Q3TG35	-0.228773	-0.243886	-0.291276	-0.254645	0.0188278	0.00271117
Col1a1	Collagen alpha-1(I) chain	P11087	-1.05557	-0.938441	-1.21181	-1.06861	0.0791832	0.00272296
Spg21	Maspardin	Q9CQC8		0.245177	0.249415	0.247296	0.00211902	0.00272745
Pdcd6ip	Pdcd6ip protein	Q80Y09	0.1799	0.146725	0.188803	0.171809	0.0128027	0.00275347
Ikbip	Inhibitor of nuclear factor kappa-B kinase-interacting protein	Q9DBZ1	0.540786	0.433551	0.55302	0.509119	0.0379486	0.002755
Acadm	Medium-chain specific acyl-CoA dehydrogenase, mitochondrial	P45952	0.263151	0.217359	0.280894	0.253801	0.0189273	0.00275775
Hagh	Hydroxyacylglutathione hydrolase, mitochondrial	Q99KB8	0.796053	0.614263	0.693802	0.701373	0.0526149	0.00279024
Ngdn	Neuroguidin	Q9DB96	-0.525309	-0.64936	-0.518146	-0.564272	0.0425943	0.0028249
Kifc1	Kinesin-like protein KIFC1	Q9QWT9	0.784335	0.630892	0.628969	0.681399	0.0514713	0.00282878
Fkbp15	FK506-binding protein 15	Q6P9Q6	0.370076	0.466971	0.470786	0.435944	0.0329525	0.00283258
Mdh2	Malate dehydrogenase, mitochondrial	P08249	0.152439	0.198712	0.179997	0.177049	0.0134389	0.00285611
Rsl1d1	PBK1	Q1PG84	-0.517759	-0.408874	-0.422761	-0.449798	0.0342161	0.00286845
Alg1	Chitobiosyldiphosphodolichol beta-mannosyltransferase	Q921Q3	-2.97139	-2.91829		-2.94484	0.0265496	0.00286969
Paf1	RNA polymerase II-associated factor 1 homolog	Q8K2T8	0.0973607	0.12682	0.111264	0.111815	0.00850857	0.00287034
Fam83d	Protein FAM83D	Q9D7I8	0.332489	0.432998	0.379256	0.381581	0.0290378	0.0028706
Map1a	Microtubule-associated protein 1A	Q9QYR6	0.39795	0.499563	0.511197	0.46957	0.0359671	0.0029079
Dpp3	Putative uncharacterized protein	Q3THP1	0.300295	0.388863	0.329035	0.339398	0.0260872	0.00292805
Mrps18a	28S ribosomal protein S18a, mitochondrial	Q5U5I3	-0.495535	-0.382697	-0.4747	-0.450977	0.0346658	0.00292842
Pole2	DNA polymerase epsilon subunit 2	O54956	0.465482		0.474137	0.46981	0.00432714	0.00293168
Oat	Ornithine aminotransferase, mitochondrial	P29758	0.504957	0.58889	0.661299	0.585049	0.0451729	0.00295446
Eps15l1	Epidermal growth factor receptor substrate 15-like 1	Q60902	0.409401	0.485003	0.374203	0.422869	0.0326863	0.00296087
Chmp7	Charged multivesicular body protein 7	Q8R1T1		-0.234853	-0.230494	-0.232673	0.00217959	0.00298171
Coro1a	Coronin-1A	O89053	1.9983		2.03652	2.01741	0.0191073	0.00301469
Gnl3	Putative uncharacterized protein	Q3TK27	-1.05009	-0.803238	-0.985759	-0.946363	0.0739332	0.00302399
Tufm	Elongation factor Tu, mitochondrial	Q8BFR5	-0.150425	-0.124082	-0.116815	-0.130441	0.0102102	0.00303561
Cluh	Clustered mitochondria protein homolog	Q5SW19	-0.750635	-0.634188	-0.576256	-0.653693	0.0512748	0.0030482
Tubgcp3	Gamma-tubulin complex component 3	P58854	0.162101	0.126834	0.162522	0.150485	0.0118264	0.00305975
Cks2	Cyclin-dependent kinases regulatory subunit 2	P56390	-0.437485	-0.565515	-0.467735	-0.490245	0.0386349	0.00307667
Wdr81	WD repeat-containing protein 81	Q5ND34	0.500217	0.380478	0.46165	0.447448	0.0352875	0.00308105
Hba	Hemoglobin subunit alpha	P01942	-5.68001	-5.26871	-4.32168	-5.09013	0.402156	0.00309213
Thoc5	THO complex subunit 5 homolog	Q8BKT7	-0.157814	-0.180753	-0.207749	-0.182105	0.014431	0.00311062
Pspc1	Paraspeckle component 1	Q8R326	-0.18485	-0.24262	-0.207523	-0.211664	0.016805	0.00312225
Atp2a2	Sarcoplasmic/endoplasmic reticulum calcium ATPase 2	O55143	-0.4254	-0.466312	-0.555587	-0.482433	0.0384364	0.0031439
Eps15	Epidermal growth factor receptor substrate 15	P42567	0.196538	0.223897	0.16953	0.196655	0.0156945	0.00315447
Nosip	Nitric oxide synthase-interacting protein	Q9D6T0	-0.967257	-0.744438	-0.799926	-0.837207	0.0669687	0.00316887
Vps18	Putative uncharacterized protein	Q3UG80	0.506035	0.41886	0.553756	0.492884	0.0394925	0.00317945
Espl1	Separin	P60330	0.886339	0.825202	0.670154	0.793898	0.0643402	0.00325201
Dbn1	Putative uncharacterized protein	Q3TRK3	0.382194	0.287722	0.338753	0.336223	0.0273009	0.00326436
Tle3	Transducin-like enhancer protein 3	Q08122	-1.45943	-1.80538	-1.92941	-1.73141	0.140626	0.00326609
Pard3	Partitioning defective 3 homolog	Q99NH2	-0.672425	-0.865334	-0.870677	-0.802812	0.0652117	0.00326679
Cdh2	Cadherin-2	P15116	0.163599	0.178678	0.134587	0.158955	0.0129381	0.00328003
1810009A15Rik	MCG127334	Q9D937	-0.866788	-0.658313	-0.826064	-0.783722	0.0637968	0.0032806
Dnajc17	DnaJ homolog subfamily C member 17	Q91WT4	-0.462413	-0.382274	-0.353283	-0.399323	0.0326362	0.00330671
Kif13b	MKIAA0639 protein (Fragment)	Q6A029	0.341157	0.264282	0.274852	0.29343	0.0240574	0.00332741
Akt1s1	Proline-rich AKT1 substrate 1 (Fragment)	F6R8S6	-0.749814		-0.734244	-0.742029	0.00778509	0.00333947
Fabp5	Fatty acid-binding protein, epidermal	Q05816	-0.33552		-0.328516	-0.332018	0.00350207	0.00335736
Pafah1b2	Platelet-activating factor acetylhydrolase IB subunit beta	Q61206	0.248551	0.277896	0.32897	0.285139	0.0234957	0.00336078
Xab2	Putative uncharacterized protein	Q3UKP5	-0.0972752	-0.0730271	-0.084389	-0.0848971	0.00700445	0.00336918
Pcyt1a	Choline-phosphate cytidylyltransferase A	P49586	0.33538	0.387045	0.290508	0.337644	0.0278906	0.00337714
Surf2	Surfeit locus protein 2	P09926	-0.69298	-0.89128	-0.710028	-0.764762	0.0634499	0.00340661
Rnf219	RING finger protein 219	Q8K2Y0	-0.790687	-0.609065	-0.637639	-0.679131	0.0563848	0.00341134
Nans	N-acetylneuraminic acid synthase (Sialic acid synthase)	Q99J77	0.453749	0.341901	0.382838	0.392829	0.032672	0.00342322
Rb1cc1	RB1-inducible coiled-coil protein 1	Q9ESK9	0.268702	0.207485	0.271465	0.249218	0.0208813	0.00347363
Strap	Serine-threonine kinase receptor-associated protein	Q9Z1Z2	-0.383759	-0.300576	-0.301359	-0.328564	0.0275981	0.00349078
Vwa8	von Willebrand factor A domain-containing protein 8	Q8CC88	0.137811	0.183486	0.1546	0.158632	0.0133384	0.00349797
Lactb	Lactb protein	Q80UJ8	0.583985	0.544908	0.716234	0.615042	0.051838	0.00351446
Mcm3ap	Mcm3ap protein (Fragment)	Q6NWV4	-0.53659	-0.711955	-0.592002	-0.613516	0.0517537	0.00352043
Ddx10	Probable ATP-dependent RNA helicase DDX10	Q80Y44	-1.01932	-1.17909	-0.878517	-1.02564	0.0868242	0.00354507
Eif3f	Eukaryotic translation initiation factor 3 subunit F	Q3U8X1	-0.256311	-0.216523	-0.291389	-0.254741	0.0216262	0.00356507
	UPF0505 protein C16orf62 homolog	Q8BWQ6	0.288582	0.267892	0.353382	0.303285	0.0257505	0.00356594
Prmt6	Protein arginine N-methyltransferase 6	Q6NZB1	-1.23818		-1.26634	-1.25226	0.01408	0.00357881
Dohh	Deoxyhypusine hydroxylase	Q99LN9	-0.218334	-0.17009	-0.225862	-0.204762	0.0174715	0.00360097
Sun2	SUN domain-containing protein 2	Q8BJS4	0.492154	0.398515	0.5363	0.475657	0.0406215	0.00360724
Eftud1	Elongation factor Tu GTP-binding domain-containing protein 1	Q8C0D5	0.15029	0.150201	0.192476	0.164323	0.0140768	0.00362938
Dhx15	Putative pre-mRNA-splicing factor ATP-dependent RNA helicase DHX15	O35286	-0.49596	-0.527207	-0.393138	-0.472102	0.040499	0.00363936
Ckap2	Cytoskeleton-associated protein 2	Q3V1H1	0.761039	0.704708	0.932766	0.799504	0.0685865	0.00363951
Urod	Uroporphyrinogen decarboxylase	P70697	0.626202	0.660116	0.821738	0.702685	0.060326	0.00364492
Prkcsh	Glucosidase 2 subunit beta	O08795	0.297782	0.272186	0.361909	0.310625	0.0266849	0.00364966
Sbds	Ribosome maturation protein SBDS	P70122	0.763805	0.572329	0.633221	0.656452	0.0564817	0.00366091
Hspb1	Heat shock protein beta-1	P14602	0.791317	0.625462	0.838995	0.751925	0.0647121	0.00366269
Idh1	Isocitrate dehydrogenase [NADP] cytoplasmic	O88844	0.172944	0.233727	0.205306	0.203992	0.0175589	0.0036639
Pold2	DNA polymerase delta subunit 2	O35654	-0.336172	-0.293242	-0.39472	-0.341378	0.0294097	0.00367011
Srfbp1	Serum response factor-binding protein 1	Q9CZ91	-0.544839	-0.646795	-0.736818	-0.642817	0.0554552	0.00368013
Utp6	U3 small nucleolar RNA-associated protein 6 homolog	Q8VCY6	-0.538329	-0.571682	-0.425679	-0.511897	0.0441711	0.00368183
Fen1	Flap endonuclease 1	Q3TGH6	0.312222	0.339076	0.251293	0.300864	0.0259695	0.00368415
Ftsj3	pre-rRNA processing protein FTSJ3	Q9DBE9	-1.24432	-0.93151	-1.19456	-1.12346	0.0970454	0.00368957
Lxn	Latexin	P70202	0.266024	0.337342	0.35723	0.320199	0.0276891	0.00369752
D6Wsu163e	Uncharacterized protein C12orf4 homolog	Q91YN0	0.168744	0.148144	0.12468	0.147189	0.0127292	0.0036981
Pls3	Plastin-3	Q99K51	0.459138	0.350303	0.366446	0.391963	0.0339094	0.00370067
Rps19	Rps19 protein (Fragment)	Q5M9P3	-0.197184	-0.22696	-0.266053	-0.230066	0.0199414	0.00371465
Rpl23	60S ribosomal protein L23	P62830	-0.414603	-0.309167	-0.394618	-0.372796	0.0323336	0.00371937
Noa1	Nitric oxide-associated protein 1	Q9JJG9	-0.358406	-0.413747	-0.305747	-0.3593	0.0311801	0.00372338
Lrrc41	Putative uncharacterized protein (Fragment)	Q3TCM6	-0.381541	-0.451768	-0.51703	-0.450113	0.0391211	0.00373475
Me1	NADP-dependent malic enzyme	P06801	0.484174	0.545983	0.402269	0.477475	0.0416217	0.00375657
Cit	Citron Rho-interacting kinase	P49025	-0.172989	-0.233154	-0.196271	-0.200805	0.0175155	0.00376134
Dis3	Exosome complex exonuclease RRP44	Q9CSH3	-0.216778	-0.294073	-0.255851	-0.255567	0.0223134	0.00376843
Stk4	Serine/threonine-protein kinase 4	Q9JI11	0.476301	0.351067	0.438215	0.421861	0.0370652	0.00381566
Krt2	Keratin, type II cytoskeletal 2 epidermal	Q3TTY5	-7.81414	-5.97726	-7.95392	-7.24844	0.636871	0.00381584
Wdr70	WD repeat-containing protein 70	Q3TWF6	-0.328009	-0.445994	-0.406728	-0.393577	0.0346882	0.00383927
Eif3e	Eukaryotic translation initiation factor 3 subunit E	P60229	-0.217705	-0.284465	-0.223332	-0.241834	0.0213774	0.00386183
Supt5h	Transcription elongation factor SPT5	O55201	0.264307	0.265202	0.200213	0.243241	0.0215153	0.00386662
Drg1	Developmentally-regulated GTP-binding protein 1	P32233	-0.344594	-0.344785	-0.445323	-0.378234	0.0335445	0.00388691
Nampt	Putative uncharacterized protein	Q3TLX1	-0.292241	-0.271229	-0.361761	-0.30841	0.0273563	0.0038881
Dcaf13	DDB1- and CUL4-associated factor 13	Q6PAC3	-0.80306	-0.600135	-0.785504	-0.729566	0.0649138	0.00391196
Rcc2	Protein RCC2	Q8BK67	-0.299052	-0.342594	-0.406381	-0.349343	0.0311662	0.00393268
Trps1	Trps1 protein	Q499D6	-0.892352	-0.664574	-0.869198	-0.808708	0.0723764	0.00395732
Anapc1	Anaphase-promoting complex subunit 1	P53995	0.0679129	0.0538761	0.0512622	0.0576837	0.00516994	0.00396863
Osgep	Putative uncharacterized protein	Q3UQ67	0.250365	0.309139	0.230358	0.263287	0.0236421	0.00398352
Mrp63	Ribosomal protein 63, mitochondrial	Q9CQF8	-0.624653		-0.640515	-0.632584	0.00793131	0.00399074
D17Wsu104e	UPF0556 protein C19orf10 homolog	Q9CPT4	0.441367	0.330682	0.353633	0.375228	0.0337269	0.00399124
Anxa5	Annexin A5	P48036	0.324371	0.237773	0.301855	0.288	0.025941	0.00400786
Ccdc124	Coiled-coil domain-containing protein 124	Q9D8X2	-0.206969	-0.281703	-0.264966	-0.251213	0.0226432	0.00401335
Cct8	Putative uncharacterized protein	Q3UKQ2	-0.252993	-0.187313	-0.244022	-0.228109	0.020562	0.00401385
	Uncharacterized protein C6orf226 homolog	Q9D727	-0.590336		-0.575524	-0.58293	0.00740625	0.00404398
Rab35	RAB35, member RAS oncogene family	Q3U0T9	0.205011	0.180687	0.246035	0.210578	0.0190686	0.00405025
Cast	Calpastatin	P51125	0.311409	0.339436	0.419361	0.356735	0.032341	0.00405948
Spata5	Spermatogenesis-associated protein 5	Q3UMC0	-0.49353	-0.454858	-0.612657	-0.520348	0.0474854	0.00411262
Nek9	MKIAA1995 protein (Fragment)	Q69Z43	0.386876	0.330323	0.281533	0.332911	0.0304376	0.00412793
Mgrn1	E3 ubiquitin-protein ligase MGRN1	Q9D074	0.969588	0.730067	0.980421	0.893359	0.0817057	0.00413062
Daglb	Sn1-specific diacylglycerol lipase beta	Q91WC9	0.422528	0.30808	0.392208	0.374272	0.0342339	0.00413142
Syncrip	Heterogeneous nuclear ribonucleoprotein Q	Q7TMK9		-0.172909	-0.168464	-0.170686	0.0022223	0.0041441
Ints10	Putative uncharacterized protein	Q8BXH8	-0.0648232	-0.0508945	-0.0698614	-0.0618597	0.00567224	0.00415172
Kif22	Kinesin-like protein KIF22	Q3V300	0.0505498	0.0507432	0.0659882	0.0557604	0.00511419	0.00415369
Xdh	Xanthine dehydrogenase/oxidase	Q00519	0.34935	0.446661	0.479866	0.425292	0.0391623	0.0041865
Sh3glb2	Endophilin-B2	A2AWI9	0.799356	0.679355	0.935969	0.804893	0.0741298	0.0041879
Sltm	SAFB-like transcription modulator	Q8CH25	-0.675584	-0.489144	-0.589167	-0.584632	0.0538681	0.00419161
Trip12	E3 ubiquitin-protein ligase TRIP12	G5E870	-0.747343	-0.54527	-0.703842	-0.665485	0.0614051	0.00420338
Wdr43	Wrd43 protein (Fragment)	Q68FC6	-0.544922	-0.415786	-0.56608	-0.508929	0.0469704	0.0042053
Col6a2	Collagen alpha-2(VI) chain	Q02788		-0.955258	-0.93024	-0.942749	0.0125093	0.00422338
Mrps18b	Putative uncharacterized protein	Q3TKB7	-0.438835	-0.318628	-0.371049	-0.376171	0.034795	0.00422381
Ada	Adenosine deaminase	P03958	0.143239	0.191776	0.19232	0.175778	0.0162704	0.00422959
Orc6	Origin recognition complex subunit 6	Q66JV6	-0.921056	-0.959009	-0.70303	-0.861032	0.0797571	0.00423569
Cpt2	Carnitine O-palmitoyltransferase 2, mitochondrial	P52825		0.716198	0.697273	0.706736	0.00946271	0.0042617
Dynlrb1	Dynein light chain roadblock-type 1	P62627	0.277725	0.297542	0.374172	0.31648	0.029408	0.00426214
Chd1	Chromodomain-helicase-DNA-binding protein 1	P40201	-0.282977	-0.207921	-0.229021	-0.239973	0.022348	0.00428075
Thbs1	Thrombospondin-1	P35441	-1.3044	-0.959245	-1.05314	-1.1056	0.103034	0.0042867
Vps39	Putative uncharacterized protein	Q3TC98	0.349029	0.400689	0.480534	0.410084	0.0382516	0.00429437
Smg8	Protein SMG8	Q8VE18	0.207452	0.220596	0.160304	0.196117	0.0183044	0.0042995
Trim16	Tripartite motif-containing protein 16	Q5SVT2	0.388658	0.510419	0.391249	0.430109	0.0401621	0.0043034
Znhit6	Box C/D snoRNA protein 1	Q3UFB2	-0.552454	-0.456686	-0.40182	-0.47032	0.0440152	0.00432244
Itsn1	Intersectin-1	Q9Z0R4	0.556202	0.407656	0.449556	0.471138	0.0442183	0.00434695
Gnb2l1	Guanine nucleotide-binding protein subunit beta-2-like 1	P68040	-0.205551	-0.254775	-0.285719	-0.248682	0.0233422	0.00434782
S100a6	Protein S100-A6	P14069	0.186862	0.248815	0.193168	0.209615	0.0196844	0.0043518
Rps26	40S ribosomal protein S26	P62855	-0.277156	-0.28526	-0.368571	-0.310329	0.0292148	0.00437326
Ctnnb1	Catenin beta-1	Q02248	0.127391	0.124261	0.165034	0.138895	0.0131005	0.0043896
Msh6	DNA mismatch repair protein Msh6	P54276	0.492483	0.367796	0.38358	0.41462	0.0391974	0.0044097
Gsn	Putative uncharacterized protein	Q3U9Q8	0.625831	0.47286	0.64853	0.582407	0.0551643	0.00442625
Cdkal1	Threonylcarbamoyladenosine tRNA methylthiotransferase	Q91WE6	-1.14884	-0.826842	-1.05798	-1.01122	0.095848	0.0044324
Brox	BRO1 domain-containing protein BROX	Q8K2Q7	1.11785	0.805374	0.937307	0.953509	0.090566	0.00445064
Ddx50	DEAD (Asp-Glu-Ala-Asp) box polypeptide 50	Q5BKP5	0.272433	0.253544	0.196224	0.240734	0.022913	0.00446896
Eif3b	Eukaryotic translation initiation factor 3 subunit B	Q8CIJ3	-0.345888	-0.249119	-0.324337	-0.306448	0.029332	0.00451879
Drg2	Developmentally-regulated GTP-binding protein 2	Q9QXB9	-0.196416	-0.144926	-0.154409	-0.16525	0.0158215	0.00452126
Upf1	Regulator of nonsense transcripts 1	Q9EPU0	-0.12752	-0.153899	-0.110888	-0.130769	0.0125219	0.00452245
Dhrs4	Putative uncharacterized protein	Q3UIB5	0.731051	0.523305	0.624061	0.626139	0.0599802	0.00452602
Acaca	Acetyl-CoA carboxylase 1	Q5SWU9	-0.292871	-0.210275	-0.271809	-0.258318	0.024779	0.00453819
Ndc80	Kinetochore protein NDC80 homolog	Q9D0F1	0.563183	0.606209	0.435335	0.534909	0.051313	0.00453858
42796	MOSC domain-containing protein 2, mitochondrial	Q922Q1	0.64446	0.759323	0.543461	0.649081	0.062357	0.00455176
Dctn4	Putative uncharacterized protein	Q3TQY2	0.234748	0.171603	0.187043	0.197798	0.019005	0.004553
Col1a2	Collagen alpha-2(I) chain	Q01149	-1.05705	-0.766129	-1.01704	-0.946741	0.0910419	0.00456054
Nup50	Nuclear pore complex protein Nup50	Q9JIH2	-0.345975	-0.483435	-0.409632	-0.413014	0.0397174	0.00456066
Wdr75	Putative uncharacterized protein (Fragment)	Q3TQZ0	-0.502801	-0.656948	-0.493309	-0.551019	0.0530349	0.00456852
Itpr3	Inositol 1,4,5-trisphosphate receptor type 3	P70227	-0.192376	-0.196809	-0.256732	-0.215306	0.0207528	0.00458155
Actn4	Alpha-actinin-4	P57780	0.253859	0.315465	0.229018	0.266114	0.0256964	0.00459786
Sart1	U4/U6.U5 tri-snRNP-associated protein 1	Q9Z315	-0.210858	-0.186256	-0.150176	-0.18243	0.0176216	0.00460087
Shcbp1	SHC SH2 domain-binding protein 1	Q9Z179	0.170093	0.229754	0.232516	0.210788	0.0203629	0.00460182
Fxr1	Fragile X mental retardation syndrome-related protein 1	Q61584	-0.166043	-0.212554	-0.232519	-0.203705	0.0196933	0.00460856
Vwa5a	von Willebrand factor A domain-containing protein 5A	Q99KC8	0.83046	0.921097	1.14561	0.965724	0.0936732	0.00463893
Ech1	Delta(3,5)-Delta(2,4)-dienoyl-CoA isomerase, mitochondrial	O35459	0.750591	0.790426	1.01645	0.85249	0.0827842	0.00464939
Rbm34	RNA-binding protein 34	Q8C5L7	-0.664752	-0.813449	-0.585463	-0.687888	0.0668227	0.00465252
Tpx2	Putative uncharacterized protein (Fragment)	Q9CT36	0.422291	0.593302	0.539018	0.518204	0.0504516	0.00467301
Nav1	Neuron navigator 1	Q8CH77	-0.469246	-0.371304	-0.52251	-0.454353	0.04428	0.00468236
Ddr2	Discoidin domain-containing receptor 2	Q62371	-0.662243	-0.565468	-0.470896	-0.566202	0.0552383	0.00469203
Fam65a	Protein FAM65A	Q68FE6	0.584391	0.74102	0.541021	0.622144	0.0607421	0.00469907
Ccdc86	Coiled-coil domain-containing protein 86	Q9JJ89	-1.20153	-0.878196	-1.19415	-1.09129	0.10657	0.00470108
Pmpca	Putative uncharacterized protein	Q3TTM6	0.259733	0.186415	0.212677	0.219609	0.021447	0.00470158
Pfn2	Profilin-2	Q9JJV2	0.276082		0.268019	0.272051	0.0040313	0.00471644
Polr1b	DNA-directed RNA polymerase I subunit RPA2	P70700	-0.371532	-0.295365	-0.416654	-0.361184	0.0353932	0.00473317
Anxa3	Annexin A3	O35639	0.275755	0.197758	0.262187	0.245233	0.0240588	0.004744
Wdr36	Protein Wdr36	Q3TA68	-0.460864	-0.327537	-0.387066	-0.391822	0.0385617	0.00477365
Sec23ip	Sec23 interacting protein	Q4G0C0	0.337113	0.2539	0.25399	0.281668	0.0277227	0.00477433
Cbr2	Carbonyl reductase [NADPH] 2	P08074	1.63031	1.2607	1.20017	1.36373	0.134431	0.00478892
Khsrp	Far upstream element-binding protein 2	Q3U0V1	-0.253016	-0.24676	-0.182728	-0.227501	0.0224595	0.00480296
Ptcd1	Putative uncharacterized protein	Q3UCI6	-0.916375	-1.29657	-1.1177	-1.11021	0.109817	0.00482143
Ist1	2400003C14Rik protein	Q8BHC2	0.177171	0.15758	0.125111	0.153287	0.015181	0.00483308
Scrib	Protein scribble homolog	Q80U72	0.276593	0.22283	0.198546	0.232656	0.0230596	0.00484062
Aars2	Alanine--tRNA ligase, mitochondrial	Q14CH7	0.212293	0.300707	0.257661	0.256887	0.0255259	0.0048649
Myo1d	Unconventional myosin-Id	Q5SYD0	0.75713	0.545164	0.603217	0.63517	0.0632408	0.0048841
Pes1	Pescadillo homolog	Q5SQ20	-0.704099	-0.501881	-0.670019	-0.625333	0.0625051	0.00492184
Ddx21	Putative uncharacterized protein	Q3ULC7	-0.595118	-0.459842	-0.6525	-0.569153	0.0571105	0.00495958
Rps8	40S ribosomal protein S8	P62242	-0.254354	-0.182127	-0.246223	-0.227568	0.0228414	0.0049624
Abcb10	ATP-binding cassette sub-family B member 10, mitochondrial	Q9JI39	0.534887	0.387338	0.531844	0.48469	0.0486838	0.00496934
Flot2	Putative uncharacterized protein	Q3UEG9	0.400791	0.3618	0.281908	0.348166	0.0349892	0.00497445
Try10	MCG140784	Q792Z1	-7.42205	-7.65851		-7.54028	0.118232	0.00499069
Fkbp3	Peptidyl-prolyl cis-trans isomerase	Q3UBU9	0.237473	0.200478	0.167167	0.201706	0.0203046	0.00499093
Cnot1	CCR4-NOT transcription complex subunit 1	Q6ZQ08	-0.212179	-0.238713	-0.167581	-0.206158	0.0207536	0.00499132
Dhrs1	Dehydrogenase/reductase SDR family member 1	Q99L04	0.493559	0.377861	0.536752	0.469391	0.0474329	0.00502886
Edc4	Enhancer of mRNA-decapping protein 4	Q3UJB9	0.230826	0.255442	0.322047	0.269438	0.0272471	0.00503607
Dhx37	DEAH (Asp-Glu-Ala-His) box polypeptide 37	Q6NZL1	-0.274585	-0.35014	-0.392117	-0.338947	0.0343869	0.00506814
2410018M08Rik	Putative uncharacterized protein	Q8CEW7	-0.768687	-0.584618	-0.564547	-0.639284	0.0649603	0.00508411
Rpf1	Ribosome production factor 1	Q7TND5	-1.01603	-1.38124	-1.04788	-1.14838	0.11679	0.00509254
Hprt1	Hypoxanthine-guanine phosphoribosyltransferase	P00493	0.474875	0.337281	0.456504	0.422886	0.0431302	0.00512122
Pccb	Putative uncharacterized protein	Q3UYS0	0.499062	0.713598	0.608989	0.607216	0.0619377	0.00512247
Stxbp1	Syntaxin-binding protein 1	O08599	0.690576	0.484269	0.633995	0.602946	0.0615458	0.00512963
Bles03	UPF0696 protein C11orf68 homolog	Q8VD62	0.304312	0.294653		0.299482	0.00482943	0.00513259
Dynlt3	Dynein light chain Tctex-type 3	P56387	0.661192	0.472734	0.647563	0.593829	0.0606755	0.00513968
Spdl1	Protein Spindly	Q923A2	0.383704	0.549926	0.480684	0.471438	0.0482062	0.00514731
Fanci	Fanconi anemia group I protein homolog	Q8K368	0.421963	0.435914		0.428938	0.00697539	0.0051759
Prc1	Protein regulator of cytokinesis 1	Q99K43	0.3009	0.294511	0.399767	0.331726	0.0340706	0.00519236
Phf6	PHD finger protein 6	Q9D4J7	-0.688927	-0.479661	-0.604591	-0.59106	0.0607876	0.0052061
Leprel2	Prolyl 3-hydroxylase 3	Q8CG70	1.18933		1.15082	1.17008	0.019258	0.00523851
Dcaf15	DDB1- and CUL4-associated factor 15	Q6PFH3	-0.938872	-0.68891	-0.972626	-0.866803	0.0894783	0.00524433
Cttnbp2nl	CTTNBP2 N-terminal-like protein	Q99LJ0	0.310414	0.418024	0.31096	0.346466	0.0357796	0.00524854
Map1s	Microtubule-associated protein 1S	Q8C052	0.20182	0.26804	0.196645	0.222168	0.0229845	0.00526709
Eif3h	Eukaryotic translation initiation factor 3 subunit H	Q3THW7	-0.193255	-0.167316	-0.237992	-0.199521	0.0206416	0.00526714
Tatdn1	Putative deoxyribonuclease TATDN1	Q6P8M1	0.35236		0.340833	0.346596	0.00576376	0.00529287
Rtn3	Reticulon-3	Q9ES97	0.399407	0.380261	0.524029	0.434566	0.0450718	0.00529334
Mybbp1a	MYB binding protein (P160) 1a, isoform CRA_b	Q3U2W2	-0.6564	-0.464362	-0.522327	-0.547696	0.0568694	0.00530508
Pde8a	High affinity cAMP-specific and IBMX-insensitive 3',5'-cyclic phosphodiesterase 8A	O88502	0.812506	1.00854	0.70959	0.843546	0.0876838	0.00531645
Chek1	Serine/threonine-protein kinase Chk1	O35280	-0.845147	-0.591278	-0.790748	-0.742391	0.0771712	0.00531673
Ddx58	Ddx58 protein (Fragment)	Q05CC6	1.3357	0.976184	1.00709	1.10633	0.115034	0.00531963
Ass1	Argininosuccinate synthase	P16460	0.464703	0.323014	0.391033	0.392917	0.040913	0.00533453
Prdx6	MKIAA0106 protein (Fragment)	Q6A0D0	0.354371	0.2576	0.268547	0.293506	0.0305961	0.00534634
Atm	Serine-protein kinase ATM	Q62388	0.486842	0.342441	0.389399	0.406227	0.0425258	0.005391
Rcl1	RNA 3'-terminal phosphate cyclase-like protein	Q9JJT0	-0.46603	-0.666427	-0.539983	-0.55748	0.0585074	0.00541788
Mad1l1	Mitotic spindle assembly checkpoint protein MAD1	Q9WTX8	-0.444891	-0.330932	-0.476449	-0.417424	0.0441951	0.00551233
Mcm6	DNA replication licensing factor MCM6	P97311	0.207377	0.208832	0.148103	0.188104	0.0200047	0.00556091
	Uncharacterized protein C12orf29 homolog	Q8BHN7	0.429942	0.601999	0.460985	0.497642	0.0529424	0.00556474
Arhgef17	Rho guanine nucleotide exchange factor 17	Q80U35	0.422198	0.300089	0.325744	0.349344	0.0371723	0.00556678
Leprel1	Prolyl 3-hydroxylase 2	Q8CG71	-0.774364	-0.532998	-0.655279	-0.654213	0.0696785	0.00557717
Slmo2	Protein slowmo homolog 2	Q9CYY7		-0.979651	-1.01472	-0.997185	0.0175335	0.00559628
Nsun2	tRNA (cytosine(34)-C(5))-methyltransferase	Q1HFZ0	-0.322487	-0.22481	-0.308587	-0.285295	0.0305072	0.00562104
Degs1	Sphingolipid delta(4)-desaturase DES1	O09005	0.333496		0.345544	0.33952	0.00602396	0.00564705
Ruvbl1	RuvB-like 1	P60122	-0.109154	-0.101098	-0.142377	-0.117543	0.0126329	0.00567718
Sf3b2	Putative uncharacterized protein	Q3UAI4	-0.431186	-0.296169	-0.392263	-0.373206	0.0401239	0.00568103
Haus5	HAUS augmin-like complex subunit 5	Q9D786	0.518182	0.35752	0.423901	0.433201	0.0466116	0.00569006
Grb10	Growth factor receptor-bound protein 10	Q60760	-0.824002	-1.19929	-1.09904	-1.04078	0.112184	0.00570992
Mut	Methylmalonyl-CoA mutase, mitochondrial	P16332	0.492065	0.495947	0.673162	0.553724	0.0597293	0.00571817
Gnpat	Dihydroxyacetone phosphate acyltransferase	P98192	0.283562	0.378186	0.272223	0.311324	0.0335911	0.00572124
Serpinb9b	Putative uncharacterized protein	Q3TJ69	0.964348	1.30492	0.950837	1.07337	0.11584	0.00572379
Slc25a11	Solute carrier family 25 (Mitochondrial carrier oxoglutarate carrier), member 11, isoform CRA_b	Q5SX53	0.517934	0.359061	0.493419	0.456805	0.0493817	0.00574259
Trnt1	CCA tRNA nucleotidyltransferase 1, mitochondrial	Q8K1J6	0.138484	0.201793	0.186122	0.175466	0.0190366	0.00578331
Vps53	Putative uncharacterized protein	Q3TJT1	0.224715	0.329018	0.276793	0.276842	0.0301096	0.00581154
Mat2a	S-adenosylmethionine synthase isoform type-2	Q3THS6	-0.453039	-0.359832	-0.527938	-0.446937	0.0486238	0.00581499
Aarsd1	Alanyl-tRNA editing protein Aarsd1	Q3THG9	-0.980166	-0.701764	-1.00677	-0.896234	0.0975378	0.00581889
	Uncharacterized protein C7orf50 homolog	Q9CXL3	-0.414108	-0.288908	-0.404687	-0.369234	0.0402551	0.00583913
Acadvl	Very long-chain specific acyl-CoA dehydrogenase, mitochondrial	P50544	0.51143	0.413043	0.605878	0.510117	0.0556705	0.00585066
Nt5c	5'(3')-deoxyribonucleotidase, cytosolic type	Q9JM14	0.531331	0.405598	0.595659	0.510862	0.0558122	0.00586313
Elmo2	Engulfment and cell motility protein 2	Q8BHL5	0.250164	0.255815	0.345958	0.283979	0.0310325	0.00586592
Hnrnpa2b1	Heterogeneous nuclear ribonucleoproteins A2/B1	O88569	-0.178479	-0.260213	-0.212071	-0.216921	0.0237189	0.00587291
Uso1	General vesicular transport factor p115	Q9Z1Z0	0.145285	0.212984	0.19608	0.184783	0.020343	0.00595207
Itpa	Inosine triphosphate pyrophosphatase	Q60I30	0.627035	0.486637	0.717788	0.610487	0.0672384	0.00595712
Aldh1l2	Mitochondrial 10-formyltetrahydrofolate dehydrogenase	Q8K009	0.232567	0.295667	0.343738	0.290657	0.0321901	0.00602214
Hmgcs1	Putative uncharacterized protein	Q3UJ70	-1.28277	-0.87372	-1.18854	-1.11501	0.123674	0.00604011
Pdhb	Pyruvate dehydrogenase E1 component subunit beta, mitochondrial	Q9D051	0.35005	0.256957	0.377176	0.328061	0.0364043	0.00604552
Mrto4	mRNA turnover protein 4 homolog	Q9D0I8	-0.478509	-0.36021	-0.532146	-0.456955	0.0507903	0.00606494
Raly	HnRNP-associated with lethal yellow, isoform CRA_f	Q3U3F6	-0.549415	-0.703424	-0.813395	-0.688744	0.0765571	0.00606548
Zfand2a	AN1-type zinc finger protein 2A	Q9JII7	0.765745		0.795572	0.780659	0.0149135	0.00608018
Chchd4	Mitochondrial intermembrane space import and assembly protein 40	Q8VEA4	0.0829495	0.0799167	0.111936	0.0916007	0.0102052	0.00609287
Dync1h1	Cytoplasmic dynein 1 heavy chain 1	Q9JHU4	0.39794	0.271982	0.376207	0.348709	0.0388734	0.0061002
Pbrm1	Protein polybromo-1	Q8BSQ9	-0.310886	-0.235451	-0.348654	-0.29833	0.0332765	0.00610712
Rbm22	Pre-mRNA-splicing factor RBM22	Q8BHS3	-0.424283	-0.288289	-0.393009	-0.368527	0.0411224	0.00611178
Spr	Sepiapterin reductase	Q91XH5	0.639799	0.514228	0.436525	0.530184	0.0592198	0.00612372
Rbm25	RNA-binding protein 25	B2RY56	-0.194168	-0.130767	-0.170644	-0.165193	0.0185042	0.00615808
Mdn1	Midasin	A2ANY6	-0.316683	-0.274795	-0.213135	-0.268205	0.0300729	0.00617007
Cct2	T-complex protein 1 subunit beta	P80314	-0.243486	-0.16813	-0.238324	-0.216647	0.024304	0.00617613
Lsg1	Large subunit GTPase 1 homolog	Q3UM18	-0.568875	-0.384096	-0.519599	-0.490857	0.0552434	0.00621532
Eif3c	Eukaryotic translation initiation factor 3 subunit C	Q8R1B4	-0.211758	-0.24775	-0.310925	-0.256811	0.0289835	0.00624943
Col12a1	Collagen alpha-1(XII) chain	Q60847	-0.637842	-0.452825	-0.661452	-0.58404	0.0659601	0.00625799
Rpn2	Putative uncharacterized protein (Fragment)	Q3U505	0.102289	0.0829961	0.0692417	0.0848424	0.00958463	0.00626147
Sf3b1	Splicing factor 3B subunit 1	Q99NB9	-0.215872	-0.301731	-0.316977	-0.278194	0.0314699	0.00627806
Mov10	Putative helicase MOV-10	P23249	0.31984	0.435398	0.310179	0.355139	0.0402261	0.00629404
Fkbp5	Putative uncharacterized protein	Q3TX72	0.193764	0.25127	0.289201	0.244745	0.0277428	0.00630331
Hgfac	Putative uncharacterized protein	Q3TDU8	-3.34718	-4.75297	-4.88021	-4.32679	0.491178	0.00632149
Nucb2	Nucleobindin-2	P81117	0.728364	0.493543	0.686539	0.636149	0.0723178	0.00633902
Ddx27	Probable ATP-dependent RNA helicase DDX27	Q921N6	-0.526826	-0.78788	-0.679386	-0.664697	0.0757169	0.00636434
Gmfb	Glia maturation factor, beta	Q80X87	0.192341	0.242827	0.287615	0.240927	0.0275197	0.00639859
Klf16	Krueppel-like factor 16	P58334	-1.93031		-1.854	-1.89216	0.0381529	0.00641745
Mccc2	Methylcrotonoyl-CoA carboxylase beta chain, mitochondrial	Q3ULD5	0.505124	0.396164	0.593331	0.498206	0.0570223	0.00642403
Bms1	Putative uncharacterized protein (Fragment)	Q3V0N4	-0.333458	-0.39328	-0.493032	-0.40659	0.0465433	0.00642592
Atp1a1	Sodium/potassium-transporting ATPase subunit alpha-1	Q8VDN2	0.263305	0.245984	0.352244	0.287178	0.0329151	0.00644174
Ddhd2	Phospholipase DDHD2	Q80Y98	0.424707	0.32526	0.487824	0.412597	0.0473172	0.00644896
Ppil1	Peptidyl-prolyl cis-trans isomerase	Q3U0J1	0.344658	0.234301	0.270354	0.283104	0.0324888	0.00645753
Tmem66	Store-operated calcium entry-associated regulatory factor	Q8R3Q0	0.525352	0.570395	0.757514	0.617754	0.0710796	0.00649094
Utp15	Putative uncharacterized protein	Q3TN42	-0.61848	-0.414858	-0.501462	-0.5116	0.058999	0.00651985
Ddx24	Putative uncharacterized protein	Q3TLR1	-0.582005	-0.784072	-0.873307	-0.746461	0.0861688	0.00653249
Dock5	Dedicator of cytokinesis protein 5	B2RY04	0.274476	0.212723	0.319997	0.269065	0.0310852	0.00654293
	UPF0600 protein C5orf51 homolog	Q8BR90	0.630266	0.757709	0.50467	0.630882	0.0730468	0.00657127
Ak3	GTP:AMP phosphotransferase AK3, mitochondrial	Q9WTP7	1.16542	1.53489	1.0551	1.2518	0.14508	0.00658366
Cad	Carbamoyl-phosphate synthetase 2, aspartate transcarbamylase, and dihydroorotase	B2RQC6	-0.130694	-0.114603	-0.168614	-0.13797	0.0160106	0.00660005
Acaa2	3-ketoacyl-CoA thiolase, mitochondrial	Q8BWT1	0.572691	0.400349	0.422949	0.46533	0.0540758	0.00661857
Dnm2	Dynamin-2	P39054	0.43249	0.28719	0.385624	0.368435	0.0428157	0.00661859
Ptk7	Inactive tyrosine-protein kinase 7	Q8BKG3	0.390088	0.558382	0.575895	0.508122	0.0592328	0.0066591
Cby1	Protein chibby homolog 1	Q9D1C2	0.405883	0.389189		0.397536	0.0083468	0.00668236
Ttc27	Tetratricopeptide repeat protein 27	Q8CD92	-0.140054	-0.191958	-0.210873	-0.180962	0.0211702	0.00670565
Ebna1bp2	Probable rRNA-processing protein EBP2	Q9D903	-0.997247	-0.6653	-0.928945	-0.863831	0.101205	0.00672486
Txnl1	Putative uncharacterized protein	Q3U8R9	-0.188231	-0.125289	-0.173791	-0.162437	0.019036	0.00672847
Eef2	Putative uncharacterized protein (Fragment)	Q3TSK4	-0.189467	-0.133819	-0.199941	-0.174409	0.0205193	0.00678033
Usp36	Ubiquitin carboxyl-terminal hydrolase 36	B1AQJ2	-0.963321	-0.814873	-1.21794	-0.998712	0.117694	0.0068024
Polr3g	DNA-directed RNA polymerase III subunit RPC7	Q6NXY9	-0.717642		-0.749031	-0.733336	0.0156945	0.00681125
Trim27	Zinc finger protein RFP	Q62158	-0.986802	-1.34221	-1.49407	-1.27436	0.150314	0.00681452
Zzef1	Zinc finger ZZ-type and EF-hand domain-containing protein 1	Q5SSH7	0.425401	0.287715	0.415999	0.376372	0.0444113	0.0068197
Pecr	Peroxisomal trans-2-enoyl-CoA reductase	Q3UXD9		0.10727	0.102757	0.105013	0.0022562	0.00683779
Dynll2	Dynein light chain 2, cytoplasmic	Q9D0M5	0.535813	0.418983	0.635801	0.530199	0.0626528	0.00683898
Csde1	Putative uncharacterized protein	Q3U1S6	-0.613036	-0.405357	-0.559205	-0.525866	0.062226	0.00685736
Afg3l2	Putative uncharacterized protein	Q3U7C0	0.25453	0.384699	0.352169	0.330466	0.0391119	0.00686
Rabgap1	Rab GTPase-activating protein 1	A2AWA9	0.294486	0.29185	0.411416	0.332584	0.0394233	0.00688075
Trim21	E3 ubiquitin-protein ligase TRIM21	Q3U7K7	1.00896	0.799174	1.21297	1.00703	0.119456	0.00689042
Plxnb2	Plexin-B2	B2RXS4	0.458112	0.305535	0.43402	0.399222	0.0473572	0.00689068
Prkar1a	Putative uncharacterized protein	Q3TYK4	-0.614172	-0.459714	-0.420596	-0.498161	0.0590945	0.00689088
Ptrhd1	Putative peptidyl-tRNA hydrolase PTRHD1	D3Z4S3	0.243437	0.362217	0.350888	0.318847	0.0378468	0.00689924
Tfrc	Transferrin receptor, isoform CRA_a	Q542D9	-0.212252	-0.282956	-0.193392	-0.229533	0.0272605	0.00690679
Tmem259	ORF61 protein (Fragment)	Q498A7	-0.380407	-0.353286	-0.513191	-0.415628	0.0494058	0.00691876
Hells	Lymphocyte-specific helicase	Q60848	-0.715022	-0.62167	-0.469098	-0.60193	0.071675	0.00694216
Rai1	Retinoic acid induced 1	Q5QGZ6	-0.206635	-0.304328	-0.302733	-0.271232	0.0323018	0.00694417
Mga	MAX gene-associated protein	A2AWL7	-0.761462	-1.14723	-0.913598	-0.940765	0.112188	0.00696234
Fam207a	Protein FAM207A	P58468	-0.511796	-0.336459	-0.422903	-0.423719	0.050617	0.00698602
Nvl	Nuclear valosin-containing protein-like	Q9DBY8	-0.546999	-0.395119	-0.600152	-0.51409	0.0614328	0.00699051
Piezo1	Piezo-type mechanosensitive ion channel component 1	E9PUQ9	0.517599	0.347668	0.506359	0.457209	0.0548664	0.00704847
Tbc1d13	TBC1 domain family, member 13	Q3TZ63	0.548007		0.524029	0.536018	0.0119891	0.00711843
Apeh	Acylamino-acid-releasing enzyme	Q8R146	0.457126	0.61705	0.701273	0.591816	0.0715995	0.00716154
H2-D1	H-2D cell surface glycoprotein (Fragment)	O78207	0.458681	0.684754	0.522394	0.555276	0.0673007	0.00718701
Uba2	SUMO-activating enzyme subunit 2	Q9Z1F9	-0.217933	-0.302369	-0.210144	-0.243482	0.0295293	0.00719597
Gstm5	Glutathione S-transferase Mu 5	P48774	0.506671	0.484225		0.495448	0.0112231	0.00720926
Parp3	Putative uncharacterized protein	Q3UGL7	0.563118	0.598609	0.394423	0.518717	0.0629857	0.00721299
Atg7	Putative uncharacterized protein	Q3TAB9	0.4801	0.487168	0.68416	0.550476	0.066873	0.00721954
Suz12	Suz12 protein (Fragment)	Q5XG68	-0.34972	-0.49167	-0.345368	-0.395586	0.0480584	0.00722004
Pitrm1	Presequence protease, mitochondrial	Q8K411	0.302873	0.345852	0.453252	0.367326	0.0447186	0.00724968
Abcb1b	Multidrug resistance protein 1B	P06795	-0.340111	-0.246874	-0.379295	-0.322093	0.0392739	0.00727207
Glud1	Glutamate dehydrogenase 1, mitochondrial	P26443	0.242591	0.367792	0.288045	0.299476	0.0365916	0.00730154
Abl2	Abelson tyrosine-protein kinase 2	B2RQ57	-0.288097	-0.32165	-0.42923	-0.346326	0.0425688	0.00738713
Krt1	Keratin, type II cytoskeletal 1	P04104	-6.98126	-5.50005	-4.58068	-5.68733	0.699285	0.00739175
Magi1	Putative uncharacterized protein (Fragment)	Q3TQ86	-1.45803	-1.52741		-1.49272	0.0346933	0.00739672
Nenf	Neudesin	Q9CQ45	0.186827	0.259869	0.287982	0.244893	0.0301459	0.00740861
2700060E02Rik	MCG140066	Q4VA29	-0.267507	-0.172634	-0.229118	-0.223086	0.0275533	0.0074571
Tbc1d10b	TBC1 domain family member 10B	Q8BHL3	0.100052	0.151605	0.116846	0.122834	0.0151805	0.00746601
Mecom	MDS1 and EVI1 complex locus protein EVI1	P14404	-0.457076	-0.686742	-0.677634	-0.607151	0.0750832	0.00747545
Uqcrc1	Putative uncharacterized protein	Q3TIC8	0.12493	0.127758	0.179805	0.144164	0.017839	0.00748443
Homer3	Homer protein homolog 3	Q99JP6	0.403388	0.621938	0.504064	0.509797	0.0631549	0.00750119
Etv6	Transcription factor ETV6	P97360		-0.253957	-0.242258	-0.248107	0.00584965	0.00750344
Mpi	Mannose-6-phosphate isomerase	Q3V100	0.298576	0.440423	0.322225	0.353741	0.0438752	0.00751891
Cpne2	Copine-2	P59108	0.347271	0.447528	0.53809	0.444296	0.0551083	0.00751925
Eif3l	Eukaryotic translation initiation factor 3 subunit L	Q8QZY1	-0.209689	-0.137603	-0.163084	-0.170126	0.0211052	0.00752181
Smek2	Serine/threonine-protein phosphatase 4 regulatory subunit 3B	Q922R5		-0.203114	-0.21295	-0.208032	0.00491791	0.00752351
Cap1	Adenylyl cyclase-associated protein 1	P40124	0.270729	0.180114	0.203981	0.218274	0.027117	0.0075428
Dkc1	H/ACA ribonucleoprotein complex subunit 4 (Fragment)	F6YUI5	-0.401481	-0.506697	-0.329995	-0.412724	0.0513181	0.00755543
Pja1	E3 ubiquitin-protein ligase Praja-1	O55176	-1.41612	-0.957036	-1.03756	-1.1369	0.14153	0.00757297
Cdca7l	Cell division cycle-associated 7-like protein	Q922M5		-0.802816	-0.765449	-0.784133	0.0186835	0.00758294
Srsf2	Serine/arginine-rich splicing factor 2	Q62093	-0.188099	-0.128925	-0.135093	-0.150706	0.0187813	0.00758905
Rbm39	Putative uncharacterized protein	Q3U313	-0.414237	-0.30254	-0.471244	-0.396007	0.0495462	0.00764771
Eif3d	Eukaryotic translation initiation factor 3 subunit D	O70194	-0.150894	-0.17924	-0.23085	-0.186995	0.0234046	0.00765334
Tollip	Toll-interacting protein	Q9QZ06	0.198882	0.306645	0.286344	0.263957	0.0330612	0.00766418
Cxadr	Coxsackievirus and adenovirus receptor homolog	P97792	-0.240815	-0.164236	-0.173226	-0.192759	0.0241677	0.0076792
Cstf1	Cleavage stimulation factor subunit 1	Q99LC2	0.405004	0.287583	0.279122	0.323903	0.040624	0.00768427
Acy1	Aminoacylase-1	Q99JW2	0.375437	0.26042	0.401935	0.345931	0.0434344	0.00770077
Pnp	Purine nucleoside phosphorylase	P23492	0.378473	0.32361	0.493618	0.398567	0.0500948	0.00771627
Atp1b1	Sodium/potassium-transporting ATPase subunit beta-1	P14094	0.325381	0.256931	0.400044	0.327452	0.0413261	0.00777852
Lgals3	Galectin-3	P16110	0.283937	0.298462	0.193972	0.25879	0.0326792	0.00778713
Eif3a	Eukaryotic translation initiation factor 3 subunit A	P23116	-0.2492	-0.204101	-0.315981	-0.256427	0.0324985	0.00784253
Rgl1	Ral guanine nucleotide dissociation stimulator-like 1	Q60695		-0.775509	-0.814698	-0.795103	0.0195948	0.00784294
Man2b2	Epididymis-specific alpha-mannosidase	O54782	1.125	0.844423	0.741522	0.903648	0.114592	0.00785157
Msh2	DNA mismatch repair protein Msh2	P43247	0.455927	0.291186	0.377271	0.374795	0.0475728	0.00786604
Nrm	Nurim	Q8VC65		0.591674	0.621711	0.606693	0.0150186	0.0078781
Ddx47	DEAD (Asp-Glu-Ala-Asp) box polypeptide 47	Q4VBG1	-0.272556	-0.339282	-0.424621	-0.345487	0.0440071	0.00792021
Hdac6	Putative uncharacterized protein	Q3U4Q5	0.402861	0.329433	0.257189	0.329828	0.0420523	0.00793487
Snrnp200	U5 small nuclear ribonucleoprotein 200 kDa helicase	Q6P4T2	-0.159268	-0.11499	-0.180648	-0.151635	0.0193342	0.00793566
Rps6ka5	Ribosomal protein S6 kinase alpha-5	Q8C050	0.290921	0.369225	0.237413	0.299186	0.0382747	0.00798739
Rela	Transcription factor p65	Q04207	0.394203	0.288583	0.262041	0.314942	0.0403644	0.0080161
Birc6	Baculoviral IAP repeat-containing protein 6	O88738	-0.303239	-0.304585	-0.438643	-0.348822	0.0449119	0.00808809
Tut1	Speckle targeted PIP5K1A-regulated poly(A) polymerase	Q8R3F9	-0.385604	-0.350398	-0.528113	-0.421371	0.0543298	0.00811049
P4ha2	Procollagen-proline, 2-oxoglutarate 4-dioxygenase (Proline 4-hydroxylase), alpha II polypeptide, isoform CRA_f	Q5SX75	0.579217	0.383912	0.588681	0.51727	0.066735	0.00812011
Uhrf1	E3 ubiquitin-protein ligase UHRF1	Q8VDF2	-0.273172	-0.253043	-0.378552	-0.301589	0.0389178	0.00812364
Hdac5	Putative uncharacterized protein	Q3U2E0	-0.415094	-0.394429		-0.404762	0.0103326	0.00812389
Otub1	Ubiquitin thioesterase OTUB1	Q7TQI3	0.178323	0.133953	0.211989	0.174755	0.0225977	0.00815665
Baiap2l1	Brain-specific angiogenesis inhibitor 1-associated protein 2-like protein 1	Q9DBJ3		2.33988	2.22264	2.28126	0.0586227	0.00817796
Fto	Alpha-ketoglutarate-dependent dioxygenase FTO	Q8BGW1	-0.421783	-0.282429	-0.302452	-0.335555	0.0434998	0.00819662
Tln1	Talin-1	P26039	0.222051	0.164471	0.260835	0.215785	0.0279938	0.00820826
Glyr1	Putative oxidoreductase GLYR1	D3YYT1	-0.257551	-0.162568	-0.227889	-0.216003	0.0280559	0.00822762
Scfd1	Sec1 family domain-containing protein 1	Q8BRF7	0.268844	0.197576	0.313918	0.260113	0.0338674	0.00826676
Kat6a	Putative uncharacterized protein (Fragment)	Q3UPM9	-0.375961	-0.549812	-0.382365	-0.436046	0.056913	0.00830615
Stx4	Syntaxin-4	P70452	0.23199	0.195397	0.303811	0.243732	0.0318425	0.00832162
Ece2	Endothelin-converting enzyme 2	Q80Z60	-0.449823	-0.29327	-0.333789	-0.358961	0.0469128	0.00832724
Uba1	Ubiquitin-like modifier-activating enzyme 1	Q02053	0.0998379	0.108571	0.150498	0.119635	0.0156357	0.00832781
Kin	DNA/RNA-binding protein KIN17	Q8K339	0.18706	0.292142	0.22522	0.234808	0.0307112	0.00833998
Ddx56	Probable ATP-dependent RNA helicase DDX56	Q9D0R4	-1.28188	-1.21636		-1.24912	0.03276	0.00834623
Stxbp2	Syntaxin binding protein 2, isoform CRA_e	Q548T0	0.629006	1.00055	0.832477	0.820678	0.107418	0.00835198
Sfpq	Splicing factor, proline- and glutamine-rich	Q8VIJ6	-0.302478	-0.260722	-0.40283	-0.32201	0.0421693	0.00836035
Atp6v0a2	V-type proton ATPase 116 kDa subunit a isoform 2	P15920	0.53472	0.800209	0.570486	0.635138	0.0831787	0.00836096
Smarca4	Transcription activator BRG1	Q3TKT4	-0.139485	-0.22116	-0.179266	-0.17997	0.0235804	0.00836871
Polr1d	DNA-directed RNA polymerases I and III subunit RPAC2	P97304	-0.399663	-0.379161		-0.389412	0.0102512	0.00837748
Cers5	Ceramide synthase 5	Q9D6K9	0.200863	0.239419	0.313223	0.251168	0.0329631	0.00839558
Caprin1	Caprin-1	Q60865	-0.306124	-0.395847	-0.486493	-0.396154	0.0520683	0.00841994
Bid	BH3-interacting domain death agonist	P70444	0.474913	0.307671	0.469459	0.417348	0.0548609	0.00842205
Golgb1	Protein Golgb1	E9PVZ8	0.386958	0.294412	0.469599	0.383656	0.0505991	0.0084765
Top2a	DNA topoisomerase 2-alpha	Q01320	0.424461	0.677575	0.561478	0.554505	0.073151	0.00848085
S100a11	Protein S100-A11	P50543	0.228226	0.327531	0.363593	0.30645	0.0404736	0.0084998
Hscb	Iron-sulfur cluster co-chaperone protein HscB, mitochondrial	Q8K3A0	1.02664	0.656817	0.991682	0.891714	0.117881	0.00851535
Arhgap1	Rho GTPase-activating protein 1	Q5FWK3	0.632442	0.39585	0.5614	0.529897	0.0700909	0.00852494
Rab3gap2	Rab3 GTPase-activating protein non-catalytic subunit	Q8BMG7	0.289625	0.457642	0.428589	0.391952	0.0518462	0.00852548
Reep5	Receptor expression enhancing protein 5	Q5QGU0	0.181352	0.197625	0.274841	0.217939	0.0288359	0.00852979
E2f4	Transcription factor E2F4	Q8R0K9	-0.882525		-0.931188	-0.906856	0.0243314	0.00853836
Tsc2	Putative uncharacterized protein	Q3TCQ7	0.619188	0.507822	0.387056	0.504689	0.0670289	0.00859287
Wdr90	WD repeat-containing protein 90	Q6ZPG2	0.725545	0.687188	1.03009	0.814273	0.108473	0.0086436
Ndufs1	Putative uncharacterized protein	Q3UIQ2	0.126023	0.183588	0.125195	0.144935	0.0193277	0.00866129
Impact	Protein IMPACT	O55091	0.945454	0.660565	1.05885	0.88829	0.118475	0.00866385
Smc1a	Structural maintenance of chromosomes protein 1A	Q9CU62	-0.146884	-0.127905	-0.19832	-0.157703	0.0210346	0.00866469
Clcn6	Chloride transport protein 6	O35454	-0.631815	-0.39366	-0.516244	-0.513907	0.0687594	0.00871747
Pop1	Processing of 1, ribonuclease P/MRP family, (S. cerevisiae)	Q8K205	-0.795577	-0.503779	-0.760638	-0.686665	0.0919975	0.00874033
Fam65b	Protein FAM65B	Q80U16	-1.44146	-0.954247	-1.50746	-1.30106	0.174448	0.0087536
Eps8	Epidermal growth factor receptor kinase substrate 8	Q08509	-0.393691	-0.373593	-0.248252	-0.338512	0.0455013	0.00879612
Snx2	Putative uncharacterized protein	Q3U5L3	0.174248	0.114483	0.180396	0.156376	0.0210213	0.0087977
Nol11	Nucleolar protein 11	Q8BJW5	-0.61739	-0.401569	-0.446994	-0.488651	0.0656915	0.00879851
Wtap	Pre-mRNA-splicing regulator WTAP	Q9ER69	-0.311512	-0.422081	-0.271332	-0.334975	0.0450711	0.00881331
Psmg1	Proteasome assembly chaperone 1	Q9JK23		0.0283104	0.0299261	0.0291182	0.000807865	0.00882903
Snx5	Putative uncharacterized protein	Q3TJN6	0.244659	0.174783	0.160132	0.193191	0.0260789	0.00886947
Stim2	Stromal interaction molecule 2	P83093	-0.388271	-0.515655	-0.327379	-0.410435	0.0554688	0.00888947
Cyb5r3	NADH-cytochrome b5 reductase 3	Q9DCN2	0.227826	0.303784	0.368235	0.299949	0.0405778	0.00890691
Utp18	Putative uncharacterized protein	Q3TJX6	-0.669001	-0.419427	-0.51958	-0.536003	0.0725121	0.00890698
Smc2	Structural maintenance of chromosomes protein	Q3ULS2	0.227113	0.159073	0.150223	0.178803	0.0242896	0.00897926
Osbpl9	Oxysterol-binding protein-related protein 9	A2A8Z1	0.337067	0.40891	0.252452	0.33281	0.0452154	0.00898103
Jak1	Tyrosine-protein kinase JAK1	P52332	-0.928043	-0.639859	-0.621748	-0.729884	0.0992177	0.00899088
Wwp2	E3 ubiquitin-protein ligase	Q3UJU3	-1.3792	-0.849465	-1.15755	-1.12874	0.153597	0.00900926
Gar1	Putative uncharacterized protein	Q3TKG5	-0.435113	-0.271562	-0.338855	-0.34851	0.0474593	0.009022
Nle1	Putative uncharacterized protein	Q3TC83	-0.413979	-0.295444	-0.269576	-0.326333	0.0444547	0.00902809
Pi4ka	Phosphatidylinositol 4-kinase, catalytic, alpha polypeptide	Q6DIC7	-0.269652	-0.190756	-0.176437	-0.212282	0.0289812	0.00906645
Naa50	N-alpha-acetyltransferase 50	Q6PGB6	-0.451415	-0.317885	-0.516907	-0.428736	0.0585612	0.00907529
Isyna1	Inositol-3-phosphate synthase 1	Q9JHU9	0.238521	0.146531	0.200481	0.195178	0.0266875	0.00909392
Camk1d	Putative uncharacterized protein	Q3TDM2	-0.401374	-0.338636	-0.536099	-0.425369	0.0582516	0.009121
Stat2	Putative uncharacterized protein	Q3UDU1	1.50829	0.958972	1.1132	1.19349	0.163577	0.00913585
Rps5	40S ribosomal protein S5	P97461	-0.249142	-0.173892	-0.283264	-0.235433	0.0323086	0.0091582
Coro1b	Coronin-1B	Q9WUM3	0.38853	0.389411	0.248069	0.342004	0.046968	0.00917137
Gmip	GEM-interacting protein	Q6PGG2	0.601488	0.370059	0.486255	0.485934	0.0668081	0.00919113
Luzp1	Leucine zipper protein 1	Q8R4U7	-0.185264	-0.125024	-0.202662	-0.170983	0.0235223	0.00920245
Dbt	Lipoamide acyltransferase component of branched-chain alpha-keto acid dehydrogenase complex, mitochondrial	P53395	0.538161	0.371001	0.604222	0.504461	0.0694016	0.00920305
Tkt	Transketolase	P40142	0.314269	0.192641	0.260299	0.255736	0.035185	0.00920408
Ncaph2	Condensin-2 complex subunit H2	Q8BSP2	0.258916	0.287645	0.40138	0.315981	0.0434978	0.00921402
Gfpt1	Glutamine--fructose-6-phosphate aminotransferase [isomerizing] 1	P47856	0.362661	0.326523	0.2229	0.304028	0.0418839	0.00922748
Aldh16a1	Aldehyde dehydrogenase family 16 member A1	Q571I9	0.321179	0.199954	0.247014	0.256049	0.0352849	0.00923296
Prmt7	Protein arginine N-methyltransferase 7	Q922X9	-0.388302	-0.345765	-0.53871	-0.424259	0.0585282	0.00925235
Ppm1f	Protein phosphatase 1F	Q8CGA0		0.54461	0.577271	0.560941	0.0163305	0.00926422
Tcirg1	T-cell, immune regulator 1, ATPase, H+ transporting, lysosomal V0 protein A3	Q91W06	0.55598	0.348784	0.539399	0.481387	0.0664744	0.00927
Nup54	Nuclear pore complex protein Nup54	Q8BTS4	-0.437907	-0.436621	-0.647531	-0.507353	0.0700898	0.00927768
Mgat1	Alpha-1,3-mannosyl-glycoprotein 2-beta-N-acetylglucosaminyltransferase	P27808	0.301451		0.319562	0.310507	0.00905544	0.00928037
Exog	Nuclease EXOG, mitochondrial	Q8C163		0.853642	0.805145	0.829394	0.0242483	0.00930351
Cpne3	Putative uncharacterized protein	Q3UJS6	0.201774	0.314447	0.320427	0.278883	0.0385929	0.0093085
Smu1	WD40 repeat-containing protein SMU1	Q3UKJ7	-0.183799	-0.14914	-0.239927	-0.190955	0.0264511	0.0093263
Nop16	Nucleolar protein 16	Q9CPT5	-0.53725	-0.790411	-0.876791	-0.734817	0.101882	0.00934329
Atl3	Atlastin-3	Q91YH5	0.860948	0.553196	0.614102	0.676082	0.0940902	0.00941157
Basp1	Brain acid soluble protein 1	Q91XV3	0.496986	0.532815	0.327795	0.452532	0.0632204	0.00948187
Zfp266	Protein Zfp266	E9Q2S7		-0.976488	-0.919958	-0.948223	0.028265	0.00948548
Gnl2	Testicular antigen (Fragment)	P70410	-0.734862	-0.639679	-0.446437	-0.606993	0.0848501	0.00949293
Ctbp2	C-terminal-binding protein 2	P56546	-0.256723		-0.241843	-0.249283	0.0074401	0.00949745
Wdr47	WD repeat-containing protein 47	Q8CGF6	0.161922		0.171888	0.166905	0.00498313	0.00950068
Ndrg1	Putative uncharacterized protein	Q3TD08	0.696649	0.422989	0.583295	0.567644	0.0793855	0.00950126
Col5a2	Collagen alpha-2(V) chain	Q3U962	-0.500981	-0.679305	-0.824223	-0.66817	0.0934778	0.00950794
Ppic	Peptidyl-prolyl cis-trans isomerase C	P30412	-0.254882	-0.381788	-0.25807	-0.298247	0.0417809	0.00953263
G3bp1	Ras GTPase-activating protein-binding protein 1	P97855	-0.262648	-0.414781	-0.417514	-0.364981	0.0511725	0.00954819
Ppm1g	Protein phosphatase 1G	Q61074	-0.556324	-0.462519	-0.3373	-0.452047	0.0634432	0.00956681
Sp2	Putative uncharacterized protein	Q3U0T7	-1.97435		-1.8589	-1.91662	0.0577211	0.00958333
Uap1l1	UDP-N-acetylhexosamine pyrophosphorylase-like protein 1	Q3TW96	0.324755	0.197352	0.290402	0.270836	0.038057	0.00958935
Fuk	L-fucose kinase	Q7TMC8	0.827958	0.529011	0.850949	0.735973	0.103693	0.00963931
	Uncharacterized protein C6orf203 homolog	Q9CQF4	-0.12982	-0.137947		-0.133883	0.00406356	0.0096582
Aldh2	Aldehyde dehydrogenase, mitochondrial	P47738	0.413829	0.682267	0.551251	0.549116	0.0774989	0.00967139
Pi4k2a	Phosphatidylinositol 4-kinase type 2-alpha	Q2TBE6	0.196173	0.1268	0.20606	0.176344	0.024936	0.00970753
Cdc73	Parafibromin	Q8JZM7	-0.0796935	-0.0481305	-0.0656143	-0.0644794	0.0091291	0.00973103
Rcbtb2	RCC1 and BTB domain-containing protein 2	Q99LJ7	-0.475841	-0.32032	-0.528694	-0.441619	0.0625389	0.00973521
Pphln1	Periphilin-1	Q8K2H1	-0.426881	-0.6716	-0.687632	-0.595371	0.084372	0.00974864
Wdr11	WD repeat-containing protein 11	Q8K1X1	0.449739	0.40589	0.272204	0.375944	0.0533921	0.00978983
Pa2g4	Proliferation-associated protein 2G4	P50580	-0.343454	-0.226111	-0.372271	-0.313945	0.0446979	0.00983717
Rabep1	Rab GTPase-binding effector protein 1	O35551	-0.197663	-0.11898	-0.163014	-0.159886	0.0227677	0.00984053
Rpl6	60S ribosomal protein L6	P47911	-0.247836	-0.228217	-0.150391	-0.208815	0.0297559	0.00985387
Stim1	Stromal interaction molecule 1	P70302	0.689786	0.469036	0.451857	0.536893	0.0766071	0.00987896
Nup188	Nucleoporin NUP188 homolog	Q6ZQH8	-0.572984	-0.369968	-0.60644	-0.516464	0.0738822	0.00992845
Als2	Alsin	Q920R0	0.491917	0.313963	0.511726	0.439202	0.0628802	0.009944
Shprh	Putative uncharacterized protein	Q3UMB4	-1.04503	-1.32115	-0.797897	-1.05469	0.151129	0.00996053
Traf2	TNF receptor-associated factor 2	P39429	-0.501721	-0.371711	-0.618691	-0.497374	0.0713301	0.00997694
Cebpz	CCAAT/enhancer-binding protein zeta	P53569	-0.48462	-0.457807	-0.295032	-0.412487	0.0592351	0.0100028
Sec14l1	Protein Sec14l1	Q99J07	-1.26758	-0.772009	-1.20345	-1.08101	0.155608	0.010049
Wfs1	Wolframin	P56695	0.47476	0.79412	0.693817	0.654232	0.0942917	0.0100733
Dhrs7b	Dehydrogenase/reductase SDR family member 7B	Q99J47	0.61682	0.368087	0.517484	0.500797	0.0722861	0.0101027
Rpl13a	60S ribosomal protein L13a	P19253	-0.368102	-0.223322	-0.347143	-0.312856	0.0451737	0.0101094
Scp2	Non-specific lipid-transfer protein	P32020	0.72835	0.576117	0.95012	0.751529	0.108586	0.0101223
Arhgef18	Rho guanine nucleotide exchange factor 18	Q6P9R4	0.483978	0.380136	0.291317	0.385144	0.0556726	0.0101309
Orc5	Origin recognition complex subunit 5	Q9WUV0	-0.524633	-0.803402	-0.541965	-0.623333	0.0901731	0.0101462
Diap3	Diaphanous homolog 3 (Drosophila)	Q0VGT1	-0.147287	-0.162625	-0.232296	-0.180736	0.0261573	0.010155
Odf2	Outer dense fiber protein 2	A3KGV1	-0.450769	-0.3688	-0.269098	-0.362889	0.0525271	0.0101577
Bpnt1	Bisphosphate 3'-nucleotidase 1, isoform CRA_a	Q3U449	0.36845	0.221135	0.336009	0.308531	0.0446906	0.0101717
Rnf168	E3 ubiquitin-protein ligase RNF168	Q80XJ2	-0.60813	-0.570404		-0.589267	0.0188629	0.0101859
Rps20	40S ribosomal protein S20	P60867	-0.254687	-0.258001	-0.386879	-0.299856	0.0435222	0.0102118
Gns	Putative uncharacterized protein (Fragment)	Q3UBB0	0.437887	0.721478	0.547335	0.5689	0.0825729	0.0102119
Cox4i1	Cytochrome c oxidase subunit 4 isoform 1, mitochondrial	P19783	0.417835	0.563751	0.345039	0.442209	0.0643021	0.0102483
Angel2	Protein angel homolog 2	Q8K1C0	0.812435	0.761596		0.787015	0.0254195	0.0102774
Mtdh	Protein LYRIC	Q80WJ7	-0.49035	-0.668045	-0.410127	-0.522841	0.0762062	0.0102952
Ddx52	Putative uncharacterized protein (Fragment)	Q3TKX4	-1.05156	-1.04024	-0.646318	-0.912705	0.133234	0.0103257
Plekhm2	Pleckstrin homology domain-containing family M member 2	Q80TQ5		-0.769418	-0.72082	-0.745119	0.024299	0.0103767
Rasa3	Putative uncharacterized protein	Q3UGJ5	-0.328611	-0.194634	-0.284839	-0.269361	0.0394424	0.0103879
Srp9	Signal recognition particle 9 kDa protein	P49962	-0.485548	-0.457668	-0.292173	-0.411796	0.0603507	0.0104051
Spty2d1	Protein SPT2 homolog	Q68FG3	-0.241248	-0.393201	-0.286481	-0.306977	0.0450464	0.0104309
Rrm1	Ribonucleoside-diphosphate reductase large subunit	P07742	-0.32866	-0.272793	-0.44696	-0.349471	0.0513431	0.010455
Apbb2	Amyloid beta A4 precursor protein-binding family B member 2	Q3TIZ5	-1.08514		-1.0159	-1.05052	0.0346159	0.0104849
Rnf213	E3 ubiquitin-protein ligase RNF213	E9Q555	0.578933	0.342405	0.473346	0.464895	0.0684102	0.0104874
Dip2b	Disco-interacting protein 2 homolog B	Q3UH60	-0.341764	-0.50844	-0.328404	-0.392869	0.0579137	0.0105234
Mcm4	DNA replication licensing factor MCM4	P49717	0.24366	0.153861	0.256382	0.217968	0.0322633	0.0106074
Utp20	Small subunit processome component 20 homolog	Q5XG71	-0.501358	-0.499752	-0.761707	-0.587605	0.087052	0.0106252
Nnt	Putative uncharacterized protein	Q3TWH2	1.09218	1.16171	1.7115	1.3218	0.195885	0.010632
Rpp38	Ribonuclease P protein subunit p38	Q80UU2	-0.792187	-0.580132	-0.48107	-0.617796	0.0917651	0.0106793
Gfm2	Putative uncharacterized protein	Q3TML3	0.31902	0.536991	0.498684	0.451565	0.0671886	0.0107148
Usp32	Ubiquitin carboxyl-terminal hydrolase	F8VPZ3	-0.266301	-0.416013	-0.279581	-0.320631	0.0478444	0.0107746
Flii	Protein flightless-1 homolog	Q9JJ28	0.0929383	0.0724814	0.121768	0.0957291	0.014296	0.0107912
Riok1	Serine/threonine-protein kinase RIO1	Q922Q2	-0.513441	-0.307409	-0.491568	-0.437473	0.0653378	0.0107933
Sfr1	Swi5-dependent recombination DNA repair protein 1 homolog	Q8BP27	-0.18394	-0.311442	-0.243612	-0.246331	0.0368316	0.0108168
Myo7a	Unconventional myosin-VIIa	P97479	0.750418	0.475154	0.799488	0.67502	0.100932	0.0108173
Rfx5	Rfx5 protein	Q0P5W9	-0.419041	-0.448546		-0.433793	0.0147529	0.0108213
Utp14a	U3 small nucleolar RNA-associated protein 14 homolog A	Q640M1	-0.714624	-0.418026	-0.626351	-0.586334	0.0879273	0.0108786
Tmsb4x	Thymosin, beta 4, X chromosome	Q6ZWX2	0.490113	0.777604	0.528644	0.598787	0.0900977	0.0109497
Arid5b	AT-rich interactive domain-containing protein 5B	Q8BM75	-0.714067		-0.66653	-0.690299	0.0237682	0.0109556
Mt1	Metallothionein-1	P02802	0.7374	0.483746	0.826826	0.682657	0.102751	0.0109566
Thoc6	THO complex subunit 6 homolog	Q5U4D9	-0.511405	-0.32991	-0.337945	-0.393087	0.0592045	0.0109704
Prpf19	Prp19 beta protein	Q4ADG5	0.0740542	0.0523199	0.0897602	0.0720448	0.0108547	0.0109777
Noc3l	Nucleolar complex protein 3 homolog	Q8VI84	-0.421261	-0.5417	-0.711292	-0.558084	0.0841247	0.0109879
Anxa1	Annexin A1	P10107	0.209085	0.319721	0.358954	0.29592	0.0448704	0.011114
Ldha	L-lactate dehydrogenase	Q3THB4	0.141075	0.225358	0.239165	0.201866	0.0306557	0.0111469
Rpl3	60S ribosomal protein L3	P27659	-0.378899	-0.229329	-0.271107	-0.293112	0.0445568	0.0111683
Ganab	Neutral alpha-glucosidase AB	Q8BHN3	0.357952	0.207468	0.295956	0.287125	0.0436649	0.0111773
	Ester hydrolase C11orf54 homolog	Q91V76		0.746755	0.801212	0.773984	0.0272283	0.0111933
Sord	Sorbitol dehydrogenase	Q64442	0.621604	0.435269	0.752196	0.603023	0.0919595	0.0112372
Ruvbl2	RuvB-like protein 2	Q3TXT7	-0.149491	-0.102032	-0.093013	-0.114845	0.0175172	0.0112418
Tnks1bp1	182 kDa tankyrase-1-binding protein	P58871	-0.0853428	-0.0847804	-0.13105	-0.100391	0.0153304	0.0112671
Rassf1	Ras association domain-containing protein 1	Q99MK9	0.771548	0.703654	0.449172	0.641458	0.0981205	0.0113039
Cwc15	Spliceosome-associated protein CWC15 homolog	Q9JHS9	-0.533588	-0.890877	-0.645056	-0.68984	0.105543	0.0113084
Soga1	Uncharacterized protein	A2ACV6	-0.198995	-0.122772	-0.208024	-0.176597	0.0270385	0.0113244
Abcd3	ATP-binding cassette sub-family D member 3	P55096	0.496391	0.464535	0.73935	0.566759	0.0867843	0.0113266
Nol8	Nucleolar protein 8	E9QKD1	-0.474111	-0.669448	-0.405428	-0.516329	0.0790852	0.011333
Fkbp10	Putative uncharacterized protein	Q3UNJ3	0.171414	0.240713	0.145171	0.185766	0.0284987	0.0113678
Ppia	Peptidyl-prolyl cis-trans isomerase A	P17742	0.230593	0.327111	0.198232	0.251979	0.0387104	0.0113984
Agpat4	1-acyl-sn-glycerol-3-phosphate acyltransferase delta	Q8K4X7	0.12365	0.108226	0.0712857	0.101054	0.0155359	0.0114146
Slc6a6	Sodium- and chloride-dependent taurine transporter	O35316	-0.625344	-0.383526	-0.650014	-0.552961	0.0850165	0.011416
Sipa1	Signal-induced proliferation-associated protein 1	P46062	0.317569	0.551805	0.4713	0.446891	0.0687107	0.0114167
Tead1	TEA domain family member 1, isoform CRA_a	Q3UFP5	-1.28712		-1.19791	-1.24251	0.0446042	0.0114219
Cpne8	Copine-8	Q9DC53	-0.403491	-0.345157	-0.232177	-0.326942	0.0502858	0.0114244
Xrcc5	X-ray repair cross-complementing protein 5	P27641	0.536855	0.399296	0.316526	0.417559	0.0642555	0.0114355
Lrp1	Prolow-density lipoprotein receptor-related protein 1	Q91ZX7	0.387196	0.223884	0.308135	0.306405	0.0471522	0.0114362
Polr2h	DNA-directed RNA polymerases I, II, and III subunit RPABC3	Q923G2	-0.629483	-0.364864	-0.494073	-0.49614	0.0763959	0.0114494
Hip1r	MKIAA0655 protein (Fragment)	Q6ZQ77	0.481428	0.517631		0.49953	0.0181011	0.0115294
Ephx1	Ephx1 protein	Q6PEV0	1.26612		1.36135	1.31374	0.0476133	0.0115313
Pdap1	28 kDa heat- and acid-stable phosphoprotein	Q3UHX2	-0.217728	-0.126773	-0.20379	-0.182763	0.0282829	0.0115604
Kif15	Kinesin-like protein KIF15	Q6P9L6	0.106553	0.165017	0.106369	0.12598	0.019519	0.0115873
Tes	Testin	P47226	0.363639	0.246029	0.429812	0.346493	0.0537419	0.011611
Dicer1	Endoribonuclease Dicer	F8VQ54	-0.192852	-0.180576	-0.11213	-0.161853	0.0251126	0.0116189
Rps10	40S ribosomal protein S10	P63325		-0.327839	-0.352732	-0.340286	0.0124469	0.0116378
Atxn2	Ataxin-2	O70305	-0.313442	-0.345284	-0.199043	-0.285923	0.0444021	0.0116387
Ltv1	Protein LTV1 homolog	Q6NSQ7	-0.508363	-0.873961	-0.663826	-0.68205	0.105932	0.0116416
Msmo1	Methylsterol monooxygenase 1	Q9CRA4	-0.469683	-0.596947	-0.801908	-0.622846	0.0967752	0.0116506
Slc7a5	Putative uncharacterized protein	Q3UQM7	-0.480055	-0.446114		-0.463084	0.0169706	0.0116598
A2m	Alpha-2-macroglobulin	Q61838		-10.2818	-9.55237	-9.91708	0.364705	0.0117007
Psmd11	Putative uncharacterized protein	Q3UWW9	-0.115479	-0.147301	-0.0847896	-0.115857	0.0180466	0.0117072
Ptpn9	Tyrosine-protein phosphatase non-receptor type 9	O35239	0.371589	0.219229	0.270595	0.287138	0.0447535	0.0117209
Hmga2	High mobility group protein HMGI-C	P52927	0.283115	0.418111	0.257471	0.319566	0.0498255	0.0117289
Dync1li2	Cytoplasmic dynein 1 light intermediate chain 2	Q6PDL0	0.3997	0.378991	0.232518	0.33707	0.0526164	0.0117555
Kiaa1033	WASH complex subunit 7	Q3UMB9	0.265666	0.450228	0.326767	0.347554	0.0542829	0.0117681
Tnpo1	Transportin-1	Q8BFY9	0.286085	0.245111	0.162998	0.231398	0.0361876	0.0117973
Cnpy3	Protein canopy homolog 3	Q9DAU1	-0.634657	-0.945806	-1.11533	-0.898599	0.140752	0.0118336
Prrc2c	Protein PRRC2C	Q3TLH4	-0.20493	-0.346287	-0.344095	-0.298437	0.0467579	0.0118395
Psmd10	26S proteasome non-ATPase regulatory subunit 10	Q9Z2X2	0.334488	0.239695	0.419421	0.331202	0.0519084	0.011847
Serpinb6a	Putative uncharacterized protein	Q3U3L3	0.482054	0.532645	0.305016	0.439905	0.0690077	0.0118677
Polr2e	MCG13422, isoform CRA_a	Q3V214	-0.236919	-0.145748	-0.159365	-0.180677	0.0283942	0.0119093
Rbm28	RNA binding motif protein 28	Q8R2W6	-0.782234	-0.444163	-0.650197	-0.625531	0.098369	0.0119243
Capn2	Calpain-2 catalytic subunit	O08529	0.0953008	0.11512	0.0653379	0.0919197	0.0144701	0.0119483
Slc44a2	Choline transporter-like protein 2	Q8BY89	1.05785	0.600601	0.920928	0.859793	0.135489	0.0119722
Mrpl39	Putative uncharacterized protein	Q8CCX9	-0.385388	-0.669139	-0.62703	-0.560519	0.0884053	0.0119922
Nop2	Putative ribosomal RNA methyltransferase NOP2	E9QN31	-0.699298	-0.435189	-0.461274	-0.53192	0.0840269	0.0120287
Naca	Putative uncharacterized protein	Q3UK68	-0.371915	-0.557758	-0.657638	-0.529104	0.0837163	0.012066
Dctn3	Dynactin subunit 3	Q9Z0Y1	0.244851	0.141971	0.235478	0.207433	0.0328429	0.0120818
Epg5	Ectopic P granules protein 5 homolog	Q80TA9	0.844943	0.49241	0.617133	0.651495	0.103208	0.0120945
Utp3	Utp3 protein (Fragment)	Q05DC6	-0.542706	-0.37484	-0.663686	-0.527077	0.0837478	0.0121644
Xpnpep3	Probable Xaa-Pro aminopeptidase 3	B7ZMP1	0.619339	0.955913	0.600995	0.725416	0.11537	0.0121865
Egln1	Egl nine homolog 1	Q91YE3	0.721157	0.460056	0.460011	0.547075	0.087041	0.0121957
Vps13c	Vacuolar protein sorting-associated protein 13C	Q8BX70	0.527917	0.297939	0.429684	0.418513	0.0666233	0.0122086
Matr3	Putative uncharacterized protein	Q3TTX0	-0.521791	-0.300874	-0.500934	-0.4412	0.0704209	0.0122711
Esyt2	Extended synaptotagmin-2	Q3TZZ7	0.319496	0.200665	0.354727	0.291629	0.0466052	0.0123003
Ddah2	N(G),N(G)-dimethylarginine dimethylaminohydrolase 2	Q99LD8	0.254483	0.343112	0.447214	0.34827	0.0556963	0.0123171
Comt	Catechol O-methyltransferase	O88587	0.270443	0.264607	0.420212	0.318421	0.0509233	0.0123174
Rab3gap1	Putative uncharacterized protein	Q3UYK8	0.550991	0.322578	0.550157	0.474575	0.075999	0.0123495
Uggt1	UDP-glucose:glycoprotein glucosyltransferase 1	Q6P5E4	0.205549	0.23302	0.342076	0.260215	0.0416917	0.0123613
Pik3r4	Phosphoinositide 3-kinase regulatory subunit 4	Q8VD65	0.388972	0.693437	0.596383	0.559597	0.0897956	0.0123976
Sumf2	Sumf2 protein	Q0VDW5	0.310647	0.502207	0.328692	0.380516	0.0610683	0.0124011
Akr1a1	Putative uncharacterized protein	Q3UJW9	0.367195	0.313093	0.205788	0.295359	0.0474306	0.0124158
Tbl3	Transducin beta-like protein 3	Q8C4J7	-0.206341	-0.367832	-0.300191	-0.291454	0.0468227	0.0124255
Clybl	Citrate lyase subunit beta-like protein, mitochondrial	Q8R4N0	0.820638	0.5021	0.885996	0.736245	0.118583	0.012487
Tcf25	Transcription factor 25	Q8R3L2	-0.758929	-0.594337	-1.03378	-0.795684	0.128182	0.0124918
Cox15	Cytochrome c oxidase assembly protein COX15 homolog	Q8BJ03	0.906192	0.551542	0.602761	0.686832	0.110672	0.0124975
Ccnt1	Cyclin-T1	Q9QWV9	0.383227	0.457953	0.255983	0.365721	0.0589571	0.0125084
Casc4	Protein CASC4	Q6P2L7	-0.522229	-0.334984	-0.327414	-0.394876	0.0637144	0.0125301
Akr1b8	Aldose reductase-related protein 2	P45377	0.459214	0.612523	0.348918	0.473552	0.0764331	0.0125378
Ifrd2	IRFD2 (Fragment)	Q7TSB3	-0.547467	-0.363542	-0.651266	-0.520759	0.0841257	0.0125588
Vps37a	Vacuolar protein sorting-associated protein 37A	Q8CHS8	0.608045	0.420984	0.35939	0.462806	0.0747642	0.0125589
Abt1	Activator of basal transcription 1	Q9QYL7	-0.597642	-0.677004	-0.998084	-0.757577	0.122416	0.0125655
Acat1	Putative uncharacterized protein	Q3TQP7	0.345073	0.56102	0.611941	0.506011	0.0818008	0.0125758
Ptgr1	Prostaglandin reductase 1	Q91YR9	0.608761	0.822183	1.07663	0.835859	0.135236	0.0125959
Ptplb	Very-long-chain (3R)-3-hydroxyacyl-[acyl-carrier protein] dehydratase 2	Q9D3B1	0.797809	0.772364	0.45762	0.675931	0.109402	0.0126052
Stat1	Putative uncharacterized protein	Q3TW11	0.620294	0.367868	0.641877	0.543347	0.0879601	0.0126099
Myh9	Myosin-9	Q8VDD5	0.136368	0.150343	0.0843333	0.123682	0.0200835	0.0126842
Npm1	MCG68069	Q5SQB7	-0.587343	-0.329028	-0.530725	-0.482366	0.0783914	0.0127044
Dpysl2	Dihydropyrimidinase-related protein 2	O08553	0.489657	0.273034	0.430891	0.397861	0.064678	0.0127118
Ccdc59	Thyroid transcription factor 1-associated protein 26	Q8R2N0		-1.14846	-1.24409	-1.19628	0.0478146	0.0127159
Chpf	Chondroitin sulfate synthase 2	Q6IQX7	-0.309875	-0.335749		-0.322812	0.0129371	0.0127498
Gm15800	AU042671 protein (Fragment)	Q6GQX8	0.764774	0.426705	0.600305	0.597261	0.097604	0.0128408
Zw10	Centromere/kinetochore protein zw10 homolog	O54692	0.125793	0.188301	0.112988	0.14236	0.0232657	0.0128421
Odc1	Ornithine decarboxylase	P00860	-0.622493	-0.938502	-1.12341	-0.894802	0.146244	0.0128435
Pole4	DNA polymerase epsilon subunit 4	Q9CQ36	0.606566	0.368308	0.65689	0.543921	0.0890004	0.0128722
Dnajb11	DnaJ homolog subfamily B member 11	Q99KV1	0.36066	0.538782	0.322279	0.40724	0.0666976	0.0128953
Cox7a2	Cytochrome c oxidase subunit 7A2, mitochondrial	P48771	0.538048	0.305477	0.395708	0.413077	0.067697	0.0129112
Pdia4	Protein disulfide-isomerase A4	P08003	0.187372	0.165514	0.278787	0.210558	0.0346934	0.0130455
Chmp4c	Charged multivesicular body protein 4c	Q9D7F7		0.395024	0.428828	0.411926	0.0169017	0.0130532
Oxct1	Succinyl-CoA:3-ketoacid-coenzyme A transferase	Q3UK61	0.436234	0.263773	0.472946	0.390984	0.0644824	0.013069
Tsg101	MCG123182	Q3UCW0	0.773256	0.486618	0.484126	0.581333	0.0959641	0.0130922
Ccdc50	Coiled-coil domain containing 50	Q3TNK7	-0.498763	-0.376684	-0.669918	-0.515122	0.0850436	0.013095
Nmd3	60S ribosomal export protein NMD3	Q99L48	-0.191529	-0.344668	-0.316002	-0.284066	0.0470028	0.0131515
Grpel2	GrpE protein homolog 2, mitochondrial	O88396	-0.477927	-0.75106	-0.464057	-0.564348	0.093442	0.0131684
Nudt1	7,8-dihydro-8-oxoguanine triphosphatase	P53368		0.485935	0.447283	0.466609	0.0193259	0.0131761
Ikbkb	Inhibitor of nuclear factor kappa-B kinase subunit beta	O88351	0.63059	0.975345	0.593937	0.73329	0.121489	0.0131839
Vav2	Guanine nucleotide exchange factor VAV2	Q60992	4.75039	3.00337	5.46109	4.40495	0.730205	0.0131981
Gak	Putative uncharacterized protein	Q3UIZ0	0.377224	0.254669	0.463274	0.365056	0.0605259	0.0132027
Fbxw11	F-box/WD repeat-containing protein 11	Q5SRY7	-0.709643	-0.529281	-0.397052	-0.545325	0.0905934	0.0132529
Nhp2l1	NHP2-like protein 1	Q9D0T1	-0.394802	-0.220337	-0.371113	-0.32875	0.0546365	0.0132632
Ybx1	Nuclease-sensitive element-binding protein 1	P62960	-1.3989	-0.835802	-0.923233	-1.05264	0.174956	0.0132651
Gltscr2	MCG2065, isoform CRA_c	Q8BK35	-1.11427	-1.41551	-1.96628	-1.49869	0.249447	0.0133015
Dak	Putative uncharacterized protein	Q3UTZ4	0.841873	0.481655	0.59185	0.638459	0.106565	0.0133732
Pld3	Phospholipase D3	O35405		0.754283	0.820525	0.787404	0.0331212	0.0133814
Vps41	Vacuolar protein sorting-associated protein 41 homolog	Q5KU39	0.963596	0.627785	0.578777	0.723386	0.120936	0.0134147
Apip	Methylthioribulose-1-phosphate dehydratase	Q9WVQ5	0.574756	0.316289	0.44479	0.445278	0.0746134	0.0134742
Ajuba	LIM domain-containing protein ajuba	Q91XC0	-0.385976	-0.268441	-0.489778	-0.381398	0.0639355	0.0134848
Aldh7a1	Alpha-aminoadipic semialdehyde dehydrogenase	Q9DBF1	0.375139	0.628744	0.682371	0.562085	0.0947462	0.0136284
Psme4	Proteasome activator complex subunit 4	Q5SSW2	-0.200709	-0.181545	-0.109852	-0.164035	0.0276507	0.013629
Chka	Choline kinase alpha	O54804	-0.277727	-0.303247	-0.166436	-0.249137	0.0420015	0.0136325
Rpl5	60S ribosomal protein L5	P47962	-0.331306	-0.201666	-0.369663	-0.300878	0.0508267	0.0136852
Cul3	MKIAA0617 protein (Fragment)	Q6ZQ84	-0.292721	-0.189471	-0.17496	-0.219051	0.0370725	0.013734
Fancd2	Putative uncharacterized protein (Fragment)	Q3U202		0.654377	0.713533	0.683955	0.029578	0.0137569
Rpl29	60S ribosomal protein L29	P47915	-0.478838	-0.665445	-0.372191	-0.505491	0.0856976	0.0137795
Cd82	CD82 antigen	P40237	0.586616	1.05022	1.02494	0.887257	0.150497	0.0137932
Rps3a	40S ribosomal protein S3a	P97351	-0.235029	-0.203785	-0.350852	-0.263222	0.0447339	0.0138441
Mast3	Microtubule-associated serine/threonine-protein kinase 3	Q3U214	0.640522	0.586988		0.613755	0.0267671	0.0138733
Dhx57	Putative ATP-dependent RNA helicase DHX57	Q6P5D3	0.798997	0.509172	0.481609	0.596593	0.101515	0.0138769
Polr3b	DNA-directed RNA polymerase III subunit RPC2	P59470	-0.294661	-0.178039	-0.186868	-0.219856	0.0374893	0.0139333
Tsfm	Elongation factor Ts, mitochondrial	Q3TA37	0.163942	0.0885224	0.143438	0.131968	0.0225146	0.0139473
Armcx3	Armadillo repeat-containing X-linked protein 3	Q8BHS6	0.355247	0.45697	0.637232	0.48315	0.0824479	0.0139535
Plxna1	Plexin-A1	P70206	-0.751385	-0.636722	-0.404628	-0.597578	0.101996	0.013959
Tsnax	Putative uncharacterized protein	Q3TXK6	0.340442	0.184418	0.305419	0.27676	0.0472649	0.0139743
Txn	Thioredoxin	P10639	0.0871539	0.161958	0.135777	0.128296	0.0219155	0.0139807
Decr2	Putative uncharacterized protein	Q3TR93		0.555881	0.508993	0.532437	0.0234439	0.0140065
Ogdh	2-oxoglutarate dehydrogenase, mitochondrial	Q60597	0.170503	0.310309	0.295629	0.258813	0.0443582	0.0140704
Rmnd5a	Protein RMD5 homolog A	Q80YQ8	0.395501	0.502064	0.271018	0.389528	0.0667639	0.0140714
Slc6a9	Sodium- and chloride-dependent glycine transporter 1	P28571	-0.303916	-0.251601	-0.442752	-0.332756	0.0570336	0.0140714
Agps	Alkyldihydroxyacetonephosphate synthase, peroxisomal	Q8C0I1	0.385766	0.212198	0.283164	0.293709	0.0503812	0.014093
Amfr	Putative uncharacterized protein	Q3TCI2	-0.701415	-0.416762	-0.449966	-0.522714	0.089863	0.0141531
Galk2	Putative uncharacterized protein	Q3U3H5	0.33259	0.414076	0.592531	0.446399	0.0767592	0.0141588
Ring1	E3 ubiquitin-protein ligase RING1	O35730	-0.293977	-0.540782	-0.408863	-0.414541	0.0713031	0.0141672
Ephb4	Ephrin type-B receptor 4	P54761	0.71569	0.654548		0.685119	0.0305713	0.0141942
Rangap1	Ran GTPase-activating protein 1	P46061	0.158592	0.118759	0.216697	0.164683	0.0284359	0.0142724
Gosr1	Golgi SNAP receptor complex member 1	O88630	0.349518	0.277932	0.187305	0.271585	0.0469344	0.0142955
Psmd5	26S proteasome non-ATPase regulatory subunit 5	Q8BJY1	0.0820246	0.15339	0.133799	0.123071	0.0212883	0.0143206
Rplp2	60S acidic ribosomal protein P2	P99027	-0.314778	-0.184599	-0.342038	-0.280472	0.048578	0.0143564
Txndc12	Thioredoxin domain-containing protein 12	Q9CQU0	0.325165	0.355937		0.340551	0.0153859	0.0143713
Optn	Optineurin	Q8K3K8	-0.0517777	-0.0723183	-0.0957492	-0.0732817	0.0127026	0.0143784
Dbi	Acyl-CoA-binding protein	P31786	0.431019	0.22965	0.356924	0.339198	0.058802	0.0143811
Ptrh2	Peptidyl-tRNA hydrolase 2, mitochondrial	Q8R2Y8	0.471602	0.252358	0.372875	0.365611	0.0633944	0.0143869
Kdm2b	Lysine-specific demethylase 2B	Q6P1G2	1.0835	1.0747	0.600089	0.91943	0.159691	0.0144333
	Uncharacterized protein C1orf122 homolog	B1ARW8		0.428035	0.468785	0.44841	0.020375	0.0144535
Prmt1	Putative uncharacterized protein	Q3UIG8	-0.288758	-0.424257	-0.239468	-0.317494	0.0552452	0.0144841
Nrbp1	Putative uncharacterized protein	Q3TCW5	0.098916	0.176468	0.121557	0.132314	0.0230244	0.0144856
Hn1	Hematological and neurological expressed 1 protein	P97825	-0.249328	-0.389871	-0.469303	-0.369501	0.064313	0.014492
Nmt1	Glycylpeptide N-tetradecanoyltransferase 1	O70310	0.213126	0.205909	0.116432	0.178489	0.0310982	0.0145201
Lepre1	Prolyl 3-hydroxylase 1	Q3V1T4	0.901997	0.498967	0.635559	0.678841	0.11834	0.0145356
Fanca	Fanconi anemia group A protein homolog	Q9JL70	0.894235	1.40351	1.68934	1.32903	0.232528	0.0146369
Urb1	Nucleolar pre-ribosomal-associated protein 1	Q571H0	-0.290392	-0.499064	-0.542247	-0.443901	0.0777601	0.0146711
Map3k3	Putative uncharacterized protein	Q3UVM5	0.447275	0.407831		0.427553	0.0197221	0.0146725
Gpr124	G-protein coupled receptor 124	Q91ZV8	-0.944662		-1.03644	-0.990553	0.0458905	0.0147362
Rrs1	MKIAA0112 protein (Fragment)	Q80U76	-0.569826	-0.809128	-1.06696	-0.815305	0.143543	0.0148134
Unc5c	Netrin receptor UNC5C	O08747	-0.629058	-1.03423	-0.631249	-0.764847	0.134695	0.0148209
Cdc5l	MCG18249, isoform CRA_a	Q3UCF2	-0.134895	-0.253014	-0.233294	-0.207067	0.0365324	0.0148725
Abcf2	Putative uncharacterized protein	Q3UVI9	-0.194197	-0.26765	-0.361589	-0.274479	0.0484426	0.0148824
Gga1	Putative uncharacterized protein (Fragment)	Q3TB03	0.130441	0.247874	0.210673	0.19633	0.0346503	0.0148826
Tmpo	Lamina-associated polypeptide 2, isoforms alpha/zeta	Q61033	-0.356885	-0.270756	-0.49802	-0.37522	0.0662429	0.0148912
Acot13	Thioesterase superfamily member 2	Q4VA32	0.739859	0.873031	1.30937	0.974088	0.171994	0.0148953
Tpi1	Triosephosphate isomerase	P17751	0.232625	0.176906	0.325609	0.245047	0.0433738	0.0149652
Krt14	Type I epidermal keratin mRNA, 3'end (Fragment)	Q61782		-7.13406	-6.49239	-6.81322	0.320836	0.0149782
Tars	Putative uncharacterized protein	Q3U630	-0.260603	-0.169104	-0.149397	-0.193035	0.0342598	0.0150424
Psme1	Proteasome activator complex subunit 1	P97371	0.976314	0.995911	0.540103	0.837443	0.148777	0.0150711
Dnttip2	Deoxynucleotidyltransferase terminal-interacting protein 2	Q8R2M2	-0.855462	-0.475867	-0.88321	-0.73818	0.131401	0.0151278
Pwp1	Periodic tryptophan protein 1 homolog	Q99LL5	-0.407623	-0.216139	-0.307452	-0.310405	0.0552963	0.0151499
Chmp5	Charged multivesicular body protein 5	Q9D7S9	0.586784	0.597944	0.323755	0.502828	0.0895943	0.0151561
Sugp1	SURP and G-patch domain-containing protein 1	Q8CH02	-0.572855	-0.521246	-0.302162	-0.465421	0.082978	0.0151732
Znf830	Zinc finger protein 830	Q8R1N0	-0.28103	-0.191392	-0.155043	-0.209155	0.0374381	0.015289
Kat2a	Putative uncharacterized protein	Q3UM02	-1.16718	-0.909335	-0.611474	-0.895997	0.160558	0.0153212
Cwc22	MKIAA1604 protein (Fragment)	Q6ZPL7	-0.101619	-0.150002	-0.193763	-0.148461	0.0266108	0.0153293
Tubg1	Tubulin gamma-1 chain	P83887	0.34851	0.426938	0.222158	0.332535	0.0596522	0.0153525
Ctdp1	Putative uncharacterized protein	Q3U0S4	-0.371078	-0.525482	-0.284019	-0.393526	0.0706022	0.0153563
Qdpr	Dihydropteridine reductase	Q8BVI4	0.399645	0.48364	0.251442	0.378242	0.0678786	0.0153642
Dlat	Dihydrolipoyllysine-residue acetyltransferase component of pyruvate dehydrogenase complex, mitochondrial	Q8BMF4	0.315236	0.192362	0.36988	0.292493	0.0524917	0.0153651
Zc3h13	Zinc finger CCCH type containing 13	B9EHN9	-0.399597	-0.362806	-0.209469	-0.323957	0.0582212	0.0154069
Hsd17b8	Estradiol 17-beta-dehydrogenase 8	P50171	0.481246	0.543703	0.844003	0.622984	0.11197	0.0154091
Wbp4	WW domain-binding protein 4	Q61048	0.0925581	0.0856233	0.147308	0.108496	0.0195088	0.0154218
Glb1	Beta-galactosidase	P23780	1.44313	1.03091	0.773372	1.08247	0.195052	0.0154843
Tns3	Tensin-3	Q5SSZ5	-0.74966	-0.488551	-0.422465	-0.553559	0.0998896	0.0155267
Ntan1	Protein N-terminal asparagine amidohydrolase	Q64311		-0.18898	-0.208386	-0.198683	0.00970286	0.0155326
Morf4l1	Putative uncharacterized protein	Q3UBK1	-0.847212	-0.498251	-0.522455	-0.622639	0.112504	0.0155659
Wdr74	WD repeat-containing protein 74	Q8VCG3	-0.520407	-0.550857	-0.290696	-0.453987	0.082117	0.0155973
Uchl3	Ubiquitin carboxyl-terminal hydrolase isozyme L3	Q9JKB1	-0.174117	-0.100052	-0.11014	-0.128103	0.0231904	0.0156219
Ccdc109b	Coiled-coil domain-containing protein 109B	Q810S1	0.460211	0.35011	0.652206	0.487509	0.0882692	0.0156273
Atf6	Atf6 protein (Fragment)	Q811K9		-0.706421	-0.779431	-0.742926	0.0365048	0.0156281
Pno1	RNA-binding protein PNO1	Q9CPS7	-0.369721	-0.333817	-0.582661	-0.428733	0.0776587	0.0156394
Fam134b	Protein FAM134B	E9QPM1	-0.621467	-1.11042	-0.727139	-0.819676	0.148538	0.0156527
Mrc2	Mannose receptor, C type 2	Q14AX9	0.490205	0.331829	0.637451	0.486495	0.088245	0.0156812
Lias	Lipoyl synthase, mitochondrial	Q8CCZ4	-0.599954		-0.543509	-0.571731	0.0282228	0.0157002
Zwilch	Protein zwilch homolog	Q8R060	0.679472	0.867893	0.44985	0.665738	0.120874	0.01571
Kif21a	Putative uncharacterized protein	Q3UHE7	0.245035	0.211385	0.126302	0.194241	0.0353311	0.0157644
Copa	Putative uncharacterized protein	Q8BTF0	0.195775	0.10989	0.211093	0.172253	0.0314932	0.0159197
Arcn1	Coatomer subunit delta	Q5XJY5	0.185435	0.097634	0.134562	0.13921	0.0254524	0.0159202
Metap1	Methionine aminopeptidase	Q4VAA9	0.151477	0.167642	0.0866804	0.135266	0.0247371	0.0159273
Kbtbd2	MKIAA1489 protein (Fragment)	Q6ZPP6	0.255854		0.231419	0.243637	0.0122174	0.0159487
Atp6v0a1	Atp6v0a1 protein	Q6NXX6	0.344359	0.236815	0.456376	0.34585	0.0633862	0.0159936
Lonp2	Lon protease homolog 2, peroxisomal	Q9DBN5	0.706693	0.996269	1.35252	1.01849	0.186765	0.0160099
Psmd12	Putative uncharacterized protein	Q3U8F5	0.0694682	0.101538	0.0547476	0.0752512	0.0138133	0.0160411
Fndc3a	Fibronectin type-III domain-containing protein 3A	Q8BX90	0.612443	0.348944	0.677507	0.546298	0.100448	0.0160926
Stard5	StAR-related lipid transfer protein 5	Q9EPQ7	0.563243	0.348484	0.324874	0.4122	0.0758284	0.0161075
Zc3h7b	Protein Zc3h7b	F8VPP8	0.236486	0.282935	0.14436	0.221261	0.0407209	0.0161209
Carm1	Histone-arginine methyltransferase CARM1	Q9WVG6	-0.408646	-0.212785	-0.385839	-0.335757	0.0618373	0.016143
Tpm4	Tropomyosin alpha-4 chain	Q6IRU2	0.21097	0.389436	0.40113	0.333846	0.0615303	0.0161655
Pcna	Proliferating cell nuclear antigen	P17918	0.301217	0.166812	0.321562	0.263197	0.0485489	0.0161907
Fbxo28	Fbxo28 protein	Q66L41	-0.56119	-0.461855	-0.285863	-0.436303	0.0805002	0.0161985
Zfp148	Putative uncharacterized protein	Q3UJ69	-0.692719	-0.389681	-0.440647	-0.507683	0.0936809	0.0162021
Odr4	Protein odr-4 homolog	Q4PJX1	0.40823	0.402827	0.215838	0.342298	0.0632493	0.0162442
Ndufb7	NADH dehydrogenase [ubiquinone] 1 beta subcomplex subunit 7	Q9CR61	0.302267	0.295451	0.159091	0.25227	0.0466308	0.0162553
Thtpa	Thiamine-triphosphatase	Q8JZL3	0.296556	0.456007	0.251945	0.334836	0.0619391	0.0162785
Aqp1	Aquaporin-1	Q02013	0.331551	0.264507	0.168818	0.254959	0.0472189	0.0163151
Rps27	40S ribosomal protein S27	Q6ZWU9	-0.273097	-0.314651	-0.159978	-0.249242	0.046216	0.0163528
Fdps	Fdps protein	Q4FJN9	-0.473434	-0.530038	-0.2706	-0.424691	0.078759	0.0163568
Crk	V-crk sarcoma virus CT10 oncogene homolog (Avian), isoform CRA_a	Q5ND51	0.235838	0.339839	0.180147	0.251941	0.0467971	0.0164064
Narfl	Cytosolic Fe-S cluster assembly factor NARFL	Q7TMW6	-0.439244	-0.312674	-0.230043	-0.32732	0.0608335	0.0164244
Anapc4	Putative uncharacterized protein	Q3TI31	-0.211965	-0.121697	-0.130343	-0.154668	0.0287567	0.0164366
Dnajc13	MCG115602	G3X922	0.258554	0.135008	0.185042	0.192868	0.0358785	0.0164535
Tbc1d2b	TBC1 domain family member 2B	Q3U0J8		0.440457	0.39712	0.418789	0.0216682	0.0164548
Atp6v1b2	V-type proton ATPase subunit B, brain isoform	P62814	0.177225	0.183266	0.303915	0.221468	0.04126	0.0165
Rps3	40S ribosomal protein S3	P62908	-0.199238	-0.220255	-0.352759	-0.257417	0.0480553	0.0165642
Fermt2	Pleckstrin homology domain containing, family C (With FERM domain) member 1	Q3TLE2	0.150061	0.106967	0.0782331	0.111754	0.0208725	0.0165794
Trio	Triple functional domain protein	Q0KL02	-0.157641	-0.23488	-0.126098	-0.172873	0.0323131	0.0166038
Park7	Protein DJ-1	Q99LX0	0.0808882	0.0733819	0.129904	0.0947246	0.0177225	0.0166338
Rad51d	DNA repair protein RAD51 homolog 4	O55230	-0.0354254	-0.0699259	-0.062476	-0.0559424	0.0104815	0.0166791
Stam2	Signal transducing adapter molecule 2	O88811	0.29252		0.324931	0.308726	0.0162058	0.0166936
Ubap1	Putative uncharacterized protein	Q3TQY7	0.312001	0.159091	0.287375	0.252822	0.0474016	0.0167006
Mrpl49	39S ribosomal protein L49, mitochondrial	Q9CQ40	-0.600238	-0.307345	-0.561504	-0.489696	0.0918585	0.0167163
Ubxn7	UBX domain-containing protein 7	Q6P5G6	-0.153727	-0.0903157	-0.179426	-0.141156	0.0264808	0.0167191
Pc	Pyruvate carboxylase, mitochondrial	Q05920	1.0037	0.504496	0.853793	0.787331	0.147891	0.0167596
Akap12	Akap12 protein	Q6IR43	0.976256	0.750646	0.493806	0.740236	0.139369	0.0168339
Mtbp	Mdm2-binding protein	Q8BJS8	-0.203544	-0.178569	-0.321903	-0.234672	0.0442073	0.0168515
Wars2	Tryptophan--tRNA ligase, mitochondrial	Q9CYK1	0.218079	0.392685	0.246964	0.285909	0.054035	0.016956
Sgta	Small glutamine-rich tetratricopeptide repeat (TPR)-containing, alpha, isoform CRA_b	Q3TN35	0.225274	0.216781	0.11584	0.185965	0.0351482	0.0169579
H1f0	Histone H1.0	P10922	-0.888078	-0.445557	-0.783425	-0.705687	0.133527	0.016994
Hist1h1e	Histone H1.4	P43274	-0.650114	-1.21075	-0.79761	-0.886157	0.167787	0.0170155
Xpot	Exportin-T	Q9CRT8	-0.412503	-0.250536	-0.235174	-0.299404	0.0567229	0.0170343
Colec12	Collectin-12	Q8K4Q8	-0.411556	-0.206125	-0.361835	-0.326505	0.0618781	0.0170452
Dda1	DET1- and DDB1-associated protein 1	Q9D9Z5	-0.349296	-0.313725		-0.33151	0.0177856	0.017061
Ncapg2	Condensin-2 complex subunit G2	Q6DFV1	0.319618	0.535412	0.309696	0.388242	0.0736407	0.0170727
Polr2a	DNA-directed RNA polymerase	O08847	-0.352125	-0.245788	-0.481998	-0.35997	0.0683007	0.0170834
Snx6	Sorting nexin-6	Q6P8X1	0.154855	0.173136	0.278119	0.202037	0.0384053	0.0171434
Lamtor3	Ragulator complex protein LAMTOR3	O88653	0.289645	0.189567	0.377513	0.285575	0.0542934	0.0171484
Ogt	UDP-N-acetylglucosamine--peptide N-acetylglucosaminyltransferase 110 kDa subunit	Q8CGY8	-0.523346	-0.316004	-0.63528	-0.491544	0.0935288	0.0171751
Vprbp	Protein VPRBP	Q80TR8	-0.829853	-0.421674	-0.78501	-0.678846	0.129236	0.0171923
Srsf1	Serine/arginine-rich splicing factor 1	Q6PDM2	-0.20394	-0.106443	-0.205808	-0.172064	0.0328147	0.01725
Bckdha	2-oxoisovalerate dehydrogenase subunit alpha, mitochondrial	P50136	0.634398	0.330667	0.434673	0.466579	0.089119	0.0173003
Copb2	Coatomer subunit beta'	O55029	0.309975	0.17556	0.187945	0.224493	0.0428901	0.0173085
Slc25a46	Solute carrier family 25 member 46	Q9CQS4		0.562746	0.627538	0.595142	0.0323963	0.01731
Klf5	Krueppel-like factor 5	Q9Z0Z7	-0.434857	-0.87397	-0.687954	-0.665593	0.127253	0.0173317
Cox6b1	Cytochrome c oxidase subunit 6B1	P56391	0.292732	0.226699	0.432783	0.317405	0.0607568	0.0173712
Ublcp1	Ubiquitin-like domain-containing CTD phosphatase 1	Q8BGR9	0.257099	0.242485	0.426721	0.308769	0.0591272	0.0173843
Gstp1	Glutathione S-transferase P 1	P19157	0.83006	0.411395	0.659935	0.633797	0.121563	0.0174373
Exoc7	Exocyst complex component 7	O35250	-0.156152	-0.303279	-0.211503	-0.223645	0.0429038	0.0174439
Rad1	Cell cycle checkpoint protein RAD1	Q9QWZ1	-0.0938321	-0.148109	-0.0806916	-0.107544	0.020634	0.0174484
Mettl14	Methyltransferase-like protein 14	Q3UIK4	-0.492647	-0.30384	-0.613982	-0.470156	0.0902335	0.0174582
Btd	Biotinidase	Q8CIF4		0.589888	0.528475	0.559181	0.0307068	0.0174621
Exosc9	Exosome complex component RRP45	Q9JHI7	-0.171988	-0.252294	-0.131069	-0.185117	0.0356052	0.0175302
Prdx5	Peroxiredoxin-5, mitochondrial	P99029	0.830225	0.988562	1.54104	1.11994	0.215454	0.0175371
	Uncharacterized protein C19orf60 homolog	Q9CYZ6	-0.234152	-0.474922	-0.378491	-0.362522	0.0699614	0.017642
Nfkb2	Putative uncharacterized protein	Q3UG25	0.792651	0.389875	0.650447	0.610991	0.117933	0.017648
Kbp	KIF1-binding protein	Q6ZPU9	0.155539	0.308568	0.223781	0.229296	0.0442615	0.0176502
Fasn	Fatty acid synthase	P19096	-0.297391	-0.150899	-0.288432	-0.245574	0.047408	0.0176532
Mapk1	Mitogen-activated protein kinase 1	P63085	0.125067	0.0635894	0.121905	0.103521	0.0199865	0.0176563
Pex19	Peroxisome biogenesis factor 19, isoform CRA_e	Q3TDI5	0.0659649	0.0763595	0.0375771	0.0599672	0.0115902	0.0176923
Ddx49	Probable ATP-dependent RNA helicase DDX49	Q4FZF3	-1.59057	-0.803394	-1.52925	-1.30774	0.252792	0.0176974
Kdelc2	Putative uncharacterized protein (Fragment)	Q8C6F3	0.449063	0.220786	0.363409	0.344419	0.0665784	0.0176976
	UPF0552 protein C15orf38 homolog	Q9D0A3	0.116492	0.231395	0.220923	0.189604	0.0366805	0.0177241
Uhrf2	Putative uncharacterized protein (Fragment)	Q3TCM1	-0.456269	-0.45354	-0.78236	-0.564056	0.109155	0.0177342
Ilk	Integrin-linked protein kinase	O55222	0.0603685	0.0390135	0.03219	0.0438573	0.00848731	0.0177349
Atg5	Autophagy protein 5	Q99J83	0.503267	0.271462	0.319722	0.364817	0.0706131	0.0177413
Tdp1	Tyrosyl-DNA phosphodiesterase 1	Q8BJ37	-0.543068	-0.268214	-0.418701	-0.409994	0.0794629	0.0177859
Lmna	Prelamin-A/C	P48678	0.148524	0.0766302	0.150344	0.125166	0.0242737	0.0178063
Ears2	Probable glutamate--tRNA ligase, mitochondrial	Q9CXJ1		-0.188825	-0.211231	-0.200028	0.0112032	0.0178093
Naa15	N-alpha-acetyltransferase 15, NatA auxiliary subunit	G3X8Y3	-0.242729	-0.123917	-0.240987	-0.202545	0.039317	0.0178383
Oard1	Putative uncharacterized protein	Q3UG43	0.200768	0.376271	0.241655	0.272898	0.053017	0.0178659
Snx1	Putative uncharacterized protein	Q3TI63	0.22502	0.251849		0.238435	0.0134143	0.0178892
Pinx1	PIN2/TERF1-interacting telomerase inhibitor 1	Q9CZX5	-0.98558	-0.492878	-0.938735	-0.805731	0.15701	0.0179692
Cables1	Putative uncharacterized protein	Q3TYS6		-0.861374	-0.96462	-0.912997	0.0516231	0.0179789
Cct3	T-complex protein 1 subunit gamma	P80318	-0.0930948	-0.110761	-0.174182	-0.126013	0.0246187	0.0180567
Trmt10a	tRNA methyltransferase 10 homolog A	Q8C1Z8	-0.342366	-0.230491	-0.176567	-0.249808	0.048827	0.0180726
Kiaa1468	LisH domain and HEAT repeat-containing protein KIAA1468	Q148V7	0.904517	0.964217	0.477286	0.782007	0.153332	0.0181807
Hnrnpa1	Heterogeneous nuclear ribonucleoprotein A1	P49312	-0.436153	-0.213539	-0.334691	-0.328128	0.0643466	0.0181855
Mast4	Microtubule-associated serine/threonine-protein kinase 4	Q811L6	0.336505	0.377402		0.356954	0.0204482	0.0182146
Naa30	N-alpha-acetyltransferase 30	Q8CES0	-0.797781	-0.468521	-0.452629	-0.572977	0.112496	0.0182264
Rpl13	60S ribosomal protein L13	P47963	-0.331341	-0.19034	-0.392567	-0.304749	0.0598727	0.0182493
Atg13	Autophagy-related protein 13	Q91YI1	0.543076	0.299773	0.615965	0.486272	0.0955935	0.0182702
Cul4b	Cullin-4B	A2A432	-0.260328	-0.337373	-0.164511	-0.254071	0.0499988	0.0183066
Mettl13	Methyltransferase-like protein 13	Q91YR5	-0.286123	-0.165397	-0.164366	-0.205295	0.0404149	0.0183191
Huwe1	Mcl-1 ubiquitin ligase	Q4JG03	-0.346219	-0.168023	-0.27243	-0.262224	0.0516932	0.0183668
Il6st	Interleukin-6 receptor subunit beta	Q00560	-0.898863	-0.641651	-0.447336	-0.662617	0.130766	0.0184045
Dhfr	Dihydrofolate reductase	P00375	0.374288	0.190352	0.379588	0.314743	0.062214	0.0184608
Elp2	Elongator complex protein 2	Q91WG4	-0.182199	-0.377669	-0.32146	-0.293776	0.0581002	0.0184792
Pitpnc1	Putative uncharacterized protein (Fragment)	Q8BTD8		-0.739684	-0.658404	-0.699044	0.0406397	0.0184845
Kif23	Kinesin family member 23	Q80V30	-0.0996423	-0.158667	-0.0845769	-0.114295	0.022608	0.018485
Ccnh	Cyclin-H	Q3UUW5	-0.130052	-0.22798	-0.132026	-0.163352	0.0323188	0.0184927
Tbl1x	F-box-like/WD repeat-containing protein TBL1X	Q9QXE7	-0.439263	-0.211893	-0.383201	-0.344786	0.0683889	0.018582
Fam73b	MFLJ00199 protein (Fragment)	Q6KAQ5	1.52048	1.0694	0.757757	1.11588	0.221403	0.0185926
Dync1i2	Cytoplasmic dynein 1 intermediate chain 2	O88487	0.32086	0.275472	0.515531	0.370621	0.0736301	0.0186379
Etfdh	Electron transfer flavoprotein-ubiquinone oxidoreductase, mitochondrial	Q921G7	0.495973	0.666049	0.980977	0.714333	0.142075	0.0186777
Cep250	Centrosome-associated protein CEP250	Q60952	0.259091	0.477483	0.290872	0.342482	0.068121	0.0186799
Kdsr	Putative uncharacterized protein	Q3TDR0	0.631977	0.314749	0.622072	0.522933	0.104131	0.0187198
Golga2	MKIAA4150 protein (Fragment)	Q5DTL1	0.0517878	0.0537893	0.0265336	0.0440369	0.00877071	0.0187266
Impa2	Putative uncharacterized protein	Q3TAU6	0.636783	1.28645	0.910919	0.944716	0.188301	0.0187538
Trim11	E3 ubiquitin-protein ligase TRIM11	Q99PQ2	0.56327	0.39598	0.279651	0.412967	0.0823132	0.018754
Ddx3x	Putative uncharacterized protein	Q3TQX5	-1.02364	-0.519147	-1.046	-0.862929	0.172013	0.0187565
Nudt2	Bis(5'-nucleosyl)-tetraphosphatase [asymmetrical]	P56380	0.819001	0.559985	0.411787	0.596924	0.118995	0.0187585
Arsk	Arylsulfatase K	Q9D2L1		0.801237	0.901834	0.851536	0.0502985	0.0187801
Nedd1	Protein NEDD1	P33215	-0.0743518	-0.107533	-0.05357	-0.078485	0.0157143	0.018914
Kdm5c	Lysine-specific demethylase 5C	P41230	-0.310323	-0.580665	-0.357377	-0.416122	0.0833856	0.0189439
Rexo4	RNA exonuclease 4	Q6PAQ4	-0.998665	-0.92946	-0.484182	-0.804102	0.161203	0.0189596
Rpl27	60S ribosomal protein L27	P61358	-0.36968	-0.221331	-0.463489	-0.3515	0.0704935	0.018973
Syngr3	Synaptogyrin-3	Q8R191	0.7307	1.17695	1.52586	1.1445	0.230115	0.0190642
Ubn1	Ubinuclein-1	Q4G0F8	-0.791707	-0.893934	-0.427297	-0.704313	0.141617	0.0190659
Suv39h1	Histone-lysine N-methyltransferase SUV39H1	O54864	-0.391854	-0.497505	-0.764954	-0.551438	0.111029	0.019115
Krt10	Keratin, type I cytoskeletal 10	P02535	-8.26567		-7.32801	-7.79684	0.46883	0.0191172
Cdv3	Protein CDV3	Q4VAA2	-0.396524	-0.236696	-0.49771	-0.376977	0.0759796	0.0191518
Slc39a7	Solute carrier family 39 (Zinc transporter), member 7	Q14C53	0.668475	0.754418		0.711447	0.0429715	0.0192026
Nedd4	E3 ubiquitin-protein ligase NEDD4	P46935	-0.536838	-0.257641	-0.493133	-0.429204	0.0867044	0.0192347
Rsu1	Ras suppressor protein 1	Q01730	0.503467	0.238206	0.410132	0.383935	0.0776863	0.019294
Pwp2	MCG115350	Q2M1K2		-0.342308	-0.386594	-0.364451	0.0221428	0.0193157
9530068E07Rik	RIKEN cDNA 9530068E07, isoform CRA_a	Q3U339	-0.50729	-1.05914	-0.977596	-0.848008	0.171977	0.0193767
Agrn	Agrin	M0QWP1	0.318918	0.29772	0.542752	0.386463	0.0783836	0.0193805
Tuba4a	Tubulin alpha-4A chain	P68368	0.411532	0.253513	0.217156	0.294067	0.0596629	0.0193924
Mical1	Protein-methionine sulfoxide oxidase MICAL1	Q8VDP3	1.54811	0.798655	0.981987	1.10958	0.22556	0.0194635
Slc25a12	Calcium-binding mitochondrial carrier protein Aralar1	Q8BH59	0.585275	0.275433	0.484185	0.448298	0.0912258	0.0195016
Nrp2	Neuropilin-2	O35375	-0.926816	-0.555624	-0.497393	-0.659944	0.134491	0.0195553
Usp5	Ubiquitin carboxyl-terminal hydrolase 5	P56399	0.0683958	0.102389	0.14196	0.104248	0.0212565	0.0195755
Rbm47	RNA-binding protein 47	Q91WT8		0.925016	1.04649	0.985754	0.0607381	0.0195882
Suclg2	Succinyl-CoA ligase [GDP-forming] subunit beta, mitochondrial	Q9Z2I8	0.248706	0.472269	0.288685	0.336553	0.0688323	0.0196875
Cpped1	Calcineurin-like phosphoesterase domain-containing protein 1	Q8BFS6	0.160325	0.341179	0.26686	0.256121	0.0524835	0.0197592
Ilkap	Integrin-linked kinase-associated serine/threonine phosphatase 2C	Q8R0F6	-0.186893	-0.357033	-0.219441	-0.254455	0.0521422	0.0197593
Psmd1	26S proteasome non-ATPase regulatory subunit 1	Q3TXS7	-0.0345114	-0.0161796	-0.0300273	-0.0269061	0.00551724	0.0197844
Cdk14	Cyclin-dependent kinase 14	O35495	-1.02431	-0.903973		-0.964142	0.0601686	0.0198389
Cpsf2	Cleavage and polyadenylation specificity factor subunit 2	O35218	-0.166636	-0.0885186	-0.18873	-0.147962	0.0303981	0.0198554
Acads	Short-chain specific acyl-CoA dehydrogenase, mitochondrial	Q07417	0.520039	0.457876	0.243707	0.407207	0.0836967	0.0198722
Mrps6	28S ribosomal protein S6, mitochondrial	P58064	-0.31638	-0.245128	-0.48735	-0.349619	0.0718715	0.0198781
Mtmr12	Myotubularin-related protein 12	Q80TA6	0.32397	0.514101	0.263469	0.36718	0.0755081	0.0198913
Cct7	T-complex protein 1 subunit eta	P80313	-0.13004	-0.258045	-0.166834	-0.184973	0.0380486	0.0199014
Mrfap1	MORF4 family-associated protein 1	Q9CQL7	-2.21282		-1.95068	-2.08175	0.13107	0.0200149
Cth	Cystathionine gamma-lyase	Q8VCN5	0.322675	0.675963	0.485615	0.494751	0.102088	0.0200187
Erlin1	Erlin-1	Q91X78	0.84652	0.393298	0.702687	0.647501	0.133712	0.0200484
Filip1l	Filamin A-interacting protein 1-like	Q6P6L0	-0.588894	-0.295397	-0.621375	-0.501889	0.103671	0.0200587
Pnn	Pinin	O35691	-0.225927	-0.11312	-0.237866	-0.192304	0.0397418	0.020077
Abr	Active breakpoint cluster region-related protein	Q5SSL4	0.485866	0.374807	0.226875	0.362516	0.0750164	0.0201266
Eea1	Early endosome antigen 1	Q8BL66	0.158607	0.186485	0.304914	0.216669	0.0448505	0.020139
Crkl	Crk-like protein	P47941		0.225046	0.19808	0.211563	0.0134829	0.0202585
Uevld	Ubiquitin-conjugating enzyme E2 variant 3	Q3U1V6	0.540344	0.296895	0.642111	0.493117	0.102415	0.0202651
Cct5	T-complex protein 1 subunit epsilon	P80316	-0.228221	-0.105511	-0.186607	-0.173446	0.0360295	0.0202722
Wdr76	WD repeat-containing protein 76	A6PWY4	-0.205324	-0.230853	-0.387986	-0.274721	0.05711	0.020301
Cotl1	Cotl1 protein	Q544F6	1.11239	0.518928	1.00867	0.879995	0.183	0.0203141
Rab11fip5	Rab11 family-interacting protein 5	Q8R361	0.477859	0.381671	0.755373	0.538301	0.112032	0.0203445
Osbpl11	Oxysterol-binding protein-related protein 11	Q8CI95	0.262113		0.298045	0.280079	0.0179657	0.0203901
Bag2	BAG family molecular chaperone regulator 2	Q91YN9	0.261443	0.324481	0.516215	0.36738	0.0766104	0.0204201
Rbm5	RNA-binding protein 5	Q91YE7	-0.238172	-0.228704	-0.41773	-0.294869	0.0614915	0.0204213
Hmmr	Hyaluronan mediated motility receptor	Q00547	0.354495	0.765614	0.595021	0.57171	0.119251	0.0204301
Lrpprc	Leucine-rich PPR motif-containing protein, mitochondrial	Q6PB66	0.105044	0.221046	0.155584	0.160558	0.0335791	0.0205322
Sdpr	Serum deprivation-response protein	Q63918	-0.644785	-0.380916	-0.825369	-0.617023	0.129051	0.0205342
Sde2	Protein SDE2 homolog	Q8K1J5	-0.33424	-0.214488	-0.166519	-0.238416	0.0498731	0.0205404
Uqcrfs1	Cytochrome b-c1 complex subunit Rieske, mitochondrial	Q9CR68	0.282386	0.132333	0.206222	0.20698	0.0433182	0.0205591
Pml	Protein PML	Q60953	0.584063	0.309397	0.672405	0.521955	0.109296	0.0205795
Prpf8	Pre-mRNA-processing-splicing factor 8	Q99PV0	-0.128648	-0.062959	-0.133023	-0.10821	0.0226607	0.0205827
Fhl1	Four and a half LIM domains protein 1	P97447	0.340672	0.197531	0.429419	0.322541	0.0675514	0.0205866
Mgea5	Bifunctional protein NCOAT	Q9EQQ9	1.60029	0.74168	1.21402	1.18533	0.248275	0.0205904
Cgnl1	Cingulin-like 1	B2RSU6	-0.674894	-0.324968	-0.459577	-0.486479	0.101907	0.0205944
Ncl	Nucleolin	P09405	-0.411934	-0.190025	-0.36558	-0.322513	0.0675818	0.0206073
Pcyox1	Putative uncharacterized protein	Q3TVT6	1.40723	0.677513	0.957283	1.01401	0.212552	0.0206199
Yeats2	YEATS domain-containing protein 2	Q3TUF7	-0.515395	-0.559392	-0.259674	-0.44482	0.0934401	0.0207025
Nudt19	Nucleoside diphosphate-linked moiety X motif 19, mitochondrial	P11930		0.671743	0.589578	0.63066	0.0410825	0.0207061
Zmym1	Zmym1 protein (Fragment)	Q05CB3	-1.04515	-1.01532	-0.493478	-0.851315	0.179125	0.0207669
Sh2b1	SH2B adapter protein 1	Q91ZM2	0.773354	1.30488	0.683923	0.920719	0.193808	0.0207828
Rassf7	Ras association domain-containing protein 7	Q9DD19	-0.642222	-0.407512	-0.319661	-0.456465	0.0962786	0.0208618
Rps27a	Ubiquitin-40S ribosomal protein S27a	P62983	-0.413198	-0.189628	-0.317953	-0.306926	0.0647744	0.0208841
Hist1h3a	Histone H3.1	P68433		-0.773382	-0.677932	-0.725657	0.0477247	0.0209044
Fam129b	Niban-like protein 1	Q8R1F1	0.133949	0.0711165	0.0775969	0.0942207	0.0199518	0.0210169
Rpl22l1	MCG16976, isoform CRA_c	Q0VBA4	-0.443664	-0.450195	-0.807092	-0.566983	0.120069	0.021019
Vapa	Vesicle-associated membrane protein-associated protein A	Q9WV55	-0.275785	-0.29784	-0.137415	-0.237013	0.0502045	0.021029
Cds2	Phosphatidate cytidylyltransferase 2	Q99L43	0.860601	0.434654	0.530946	0.608734	0.128965	0.0210358
Trappc12	Putative uncharacterized protein	Q3UGE1	0.669623	0.343695	0.404122	0.47248	0.100103	0.0210376
Hectd1	E3 ubiquitin-protein ligase HECTD1	F8WIE5	-0.469289	-0.291357	-0.631987	-0.464211	0.0983642	0.0210428
Akap10	A-kinase anchor protein 10, mitochondrial	O88845	0.214445	0.0972342	0.175792	0.16249	0.0344834	0.0211028
Heatr3	Putative uncharacterized protein	Q3USC0	-0.325837	-0.230083	-0.152488	-0.236136	0.050133	0.0211192
Rpl30	60S ribosomal protein L30	P62889	-0.180326	-0.372903	-0.385944	-0.313058	0.0664727	0.0211245
Hnrnph3	MCG11326, isoform CRA_b	D3YWT1	-0.681684	-0.596637		-0.63916	0.0425233	0.021146
Acaa1a	Putative uncharacterized protein	Q3UPU8	0.628893	0.9217	0.437484	0.662692	0.140799	0.021149
Nom1	Nucleolar MIF4G domain-containing protein 1	Q3UFM5	-0.536851	-0.25771	-0.550254	-0.448272	0.0953594	0.0211978
Fam175b	BRISC complex subunit Abro1	Q3TCJ1	0.369788	0.2782	0.169265	0.272417	0.0579581	0.0212031
Def8	Differentially expressed in FDCP 8	Q99J78	0.392463	0.317046	0.177473	0.295661	0.0629767	0.0212495
Pole	DNA polymerase epsilon catalytic subunit A	Q9WVF7	0.310398	0.142556	0.287939	0.246964	0.0526054	0.0212504
Poldip3	Putative uncharacterized protein	Q3U8V1	-0.34584	-0.394909	-0.667675	-0.469474	0.100107	0.0212925
Plcd1	Plcd1 protein	Q05DG3	0.585683	1.17726	0.734373	0.832439	0.177674	0.0213308
Ide	Insulin degrading enzyme	Q8CGB9	0.173069	0.085984	0.108177	0.12241	0.0261272	0.0213312
Kdm4a	Lysine-specific demethylase 4A	Q8BW72	-0.742882	-0.512403	-0.349127	-0.534804	0.114218	0.0213555
Gbas	Protein NipSnap homolog 2	O55126		0.775601	0.677867	0.726734	0.048867	0.0213716
Dopey2	Protein dopey-2	Q3UHQ6		0.113962	0.0995522	0.106757	0.00720478	0.0214495
Npm3	Putative uncharacterized protein	Q3TAH3	-0.331133	-0.196621	-0.433591	-0.320448	0.0686156	0.0214594
Plcg1	Plcg1	Q2M4I9	0.182864	0.40705	0.345457	0.31179	0.0668704	0.0215249
Bub1b	Mitotic checkpoint serine/threonine-protein kinase BUB1 beta	Q9Z1S0	-0.154985	-0.216608	-0.325442	-0.232345	0.0498319	0.0215252
Zfr	Zinc finger RNA-binding protein	O88532	-0.4827	-0.224855	-0.336328	-0.347961	0.0746606	0.0215425
Lyrm4	LYR motif-containing protein 4	Q8K215	-0.513157		-0.44792	-0.480538	0.0326183	0.0215734
Vps11	Vacuolar protein sorting-associated protein 11 homolog	Q91W86	0.468507	0.408894		0.438701	0.0298065	0.0215936
Mum1l1	PWWP domain-containing protein MUM1L1	Q4VA55		-0.688776	-0.789403	-0.739089	0.0503136	0.0216356
Cdh13	Putative uncharacterized protein	Q8CE18	-0.451648	-0.226136	-0.276105	-0.317963	0.0683814	0.0216356
Col2a1	Collagen alpha-1(II) chain	P28481		-2.86244	-2.49689	-2.67967	0.182778	0.0216781
Sil1	Nucleotide exchange factor SIL1	Q9EPK6	0.2022	0.174794	0.341383	0.239459	0.0515727	0.0216942
Osbpl3	Oxysterol-binding protein	Q80UX3	0.179334	0.266873	0.125737	0.190648	0.0411333	0.0217666
Rps24	40S ribosomal protein S24	P62849	-0.670402	-0.33787	-0.403197	-0.47049	0.10172	0.0218506
C3	Complement C3	P01027	-4.50914	-7.79907	-4.05631	-5.45484	1.17938	0.0218522
Rps23	40S ribosomal protein S23	P62267	-0.244618	-0.375376	-0.179366	-0.266453	0.0576269	0.0218646
Fam115a	Protein FAM115A	Q8BNE1	-0.767253	-0.342553	-0.606227	-0.572011	0.123788	0.02189
Stmn1	Stathmin	P54227	0.447634	0.217917	0.483031	0.382861	0.0831025	0.0220128
Apex2	DNA-(apurinic or apyrimidinic site) lyase 2	Q68G58	-0.565241	-0.611551	-0.27567	-0.484154	0.105096	0.0220155
Gigyf2	PERQ amino acid-rich with GYF domain-containing protein 2	Q6Y7W8	-0.327901	-0.661436	-0.404047	-0.464461	0.100911	0.0220521
	Uncharacterized protein C1orf112 homolog	Q3TQQ9	-0.97267	-0.845876		-0.909273	0.0633972	0.0221577
Nsf	Vesicle-fusing ATPase	P46460	0.0976242	0.218533	0.199125	0.171761	0.0374893	0.0222423
Bloc1s2	Biogenesis of lysosome-related organelles complex 1 subunit 2	Q9CWG9	-0.0707667	-0.0830791	-0.0367162	-0.0635207	0.0138655	0.022246
Riok2	Serine/threonine-protein kinase RIO2	Q9CQS5	-1.76636	-0.912584	-1.01676	-1.2319	0.268917	0.022248
Emc1	ER membrane protein complex subunit 1	Q8C7X2	0.177973	0.232236	0.368491	0.259567	0.0566699	0.0222539
Rpa3	Replication protein A 14 kDa subunit	Q9CQ71	1.03876	0.593776	0.539803	0.724115	0.158095	0.0222545
Inpp5b	Type II inositol 1,4,5-trisphosphate 5-phosphatase	Q8K337	0.971584	0.539986	0.517282	0.676284	0.147795	0.0222949
Sptbn1	Spectrin beta chain, non-erythrocytic 1	Q62261	0.030663	0.0572678	0.0695272	0.052486	0.0114711	0.0222977
Tor1b	Putative uncharacterized protein	Q3TAL5	0.463337	0.96097	0.605758	0.676688	0.147967	0.0223185
Nsa2	5730427N09Rik protein	Q32P03		-1.09935	-1.26554	-1.18244	0.0830937	0.0223318
Whsc1l1	Histone-lysine N-methyltransferase NSD3	Q6P2L6	-0.511192	-0.248591	-0.317379	-0.359054	0.0786181	0.0223747
Hdac10	Hdac10 protein	Q05DI9	0.24117	0.113052	0.15901	0.171077	0.0374732	0.0223906
Zfyve27	Protrudin	Q3TXX3	0.951993	0.740887	0.420034	0.704305	0.154649	0.0224928
Afg3l1	AFG3-like protein 1	Q920A7	-0.122117	-0.274665	-0.252472	-0.216418	0.0475836	0.0225486
Zc3h15	Zinc finger CCCH domain-containing protein 15	Q3TIV5	-0.194394	-0.415466	-0.272808	-0.294223	0.0647102	0.0225615
Yipf3	Protein YIPF3	Q3UDR8		0.565362	0.652006	0.608684	0.043322	0.022617
	Uncharacterized protein C17orf85 homolog	Q8BZR9	-0.583598	-0.630598	-0.280267	-0.498154	0.109785	0.0226474
Nudt5	ADP-sugar pyrophosphatase	Q9JKX6	0.515994	0.29216	0.26728	0.358478	0.0790848	0.0226913
Capns1	Calpain small subunit 1	O88456	0.227117	0.149065	0.105824	0.160669	0.0354917	0.0227463
Sf3b4	Splicing factor 3B subunit 4	Q8QZY9	-0.39298	-0.196455	-0.449364	-0.346266	0.0766538	0.0228372
Stk19	MCG134593, isoform CRA_a	Q3TG64	0.374638		0.324388	0.349513	0.0251249	0.0228426
Parp10	Putative uncharacterized protein	Q3TLV7	0.46634	0.993111	1.0458	0.835082	0.184997	0.0228679
Rpl34	60S ribosomal protein L34	Q9D1R9	-0.418205	-0.187298	-0.402044	-0.335849	0.0744219	0.0228797
Etfa	Electron transfer flavoprotein subunit alpha, mitochondrial	Q99LC5	0.941285	0.533187	0.484363	0.652945	0.144857	0.0229295
Carkd	ATP-dependent (S)-NAD(P)H-hydrate dehydratase	Q9CZ42	0.22728	0.240083	0.433195	0.300186	0.0666071	0.0229362
Nob1	NIN1/RPN12 binding protein 1 homolog (S. cerevisiae)	Q148S3	-0.726256	-0.574759	-1.18717	-0.829397	0.184157	0.0229654
Atrx	Transcriptional regulator ATRX	Q61687	-0.435616	-0.219137	-0.253122	-0.302625	0.0672153	0.0229788
Ptpn6	Tyrosine-protein phosphatase non-receptor type 6	P29351	0.925133	0.445022	1.01438	0.794846	0.176799	0.0230414
Cops7b	COP9 signalosome complex subunit 7b	Q8BV13	0.148083	0.185452	0.305099	0.212878	0.0473556	0.0230457
Rfc3	MCG17786, isoform CRA_a	Q3TKD1	0.165248	0.132808	0.0716442	0.123234	0.027442	0.0230899
Ppa1	Pyp protein	Q4FK49	-0.261995	-0.133238	-0.149644	-0.181626	0.0404627	0.0231088
Rilpl1	RILP-like protein 1	Q9JJC6	0.244801	0.43291	0.221847	0.299853	0.0668578	0.0231452
Bag5	BAG family molecular chaperone regulator 5	Q8CI32	0.115903	0.0507191	0.0870848	0.0845691	0.0188591	0.0231516
Hdlbp	High density lipoprotein (HDL) binding protein, isoform CRA_d	Q3U4Z7	-0.11345	-0.215917	-0.262855	-0.197407	0.0441112	0.0232388
Supv3l1	ATP-dependent RNA helicase SUPV3L1, mitochondrial	Q80YD1	-0.0699251	-0.0326012	-0.0448879	-0.049138	0.010982	0.0232468
Traf7	E3 ubiquitin-protein ligase TRAF7	F8WJF7	-0.340783	-0.715153	-0.440754	-0.498897	0.111913	0.0234073
Scai	Protein SCAI	Q8C8N2		0.300324	0.348426	0.324375	0.0240511	0.0235583
Eral1	GTPase Era, mitochondrial	Q9CZU4	-1.27395	-0.557622	-0.921564	-0.917713	0.206796	0.0236053
Ppp1r13l	Putative uncharacterized protein	Q3TCU2	-0.328301		-0.282771	-0.305536	0.022765	0.0236731
Exosc2	Exosome component 2	Q3TKQ3	-0.246506	-0.219696	-0.10591	-0.190704	0.0430976	0.0237328
Pdcd5	Programmed cell death protein 5	P56812	0.190034	0.113782	0.0913273	0.131715	0.0298716	0.023889
Dctn2	Dynactin 2	Q3TPZ5	0.0574149	0.127343	0.130529	0.105096	0.0238581	0.0239326
Agpat6	Putative uncharacterized protein (Fragment)	Q3TSI4	-0.113367	-0.266508	-0.211993	-0.197289	0.0448151	0.0239602
Phyh	Phytanoyl-CoA dioxygenase, peroxisomal	O35386		1.12734	1.31146	1.2194	0.0920604	0.0239858
Usp7	Ubiquitin carboxyl-terminal hydrolase 7	Q6A4J8	-0.314063	-0.260012	-0.133177	-0.235751	0.0536077	0.0240067
Pcdh19	Pcdh19 protein	Q147Z9	-1.24604	-1.45027		-1.34816	0.102116	0.0240643
Nat10	N-acetyltransferase 10	Q8K224	-0.189215	-0.134708	-0.0823826	-0.135435	0.030842	0.0240723
Ifrd1	Interferon-related developmental regulator 1	P19182	-1.12239	-0.587384	-1.38743	-1.0324	0.235296	0.0241088
Atp5a1	ATP synthase subunit alpha, mitochondrial	Q03265	0.226395	0.123238	0.117061	0.155564	0.03546	0.0241153
Twistnb	DNA-directed RNA polymerase I subunit RPA43	Q78WZ7		-0.203672	-0.237196	-0.220434	0.016762	0.024158
Polr2m	DNA-directed RNA polymerase II subunit GRINL1A	Q6P6I6	-0.203587	-0.237231		-0.220409	0.0168223	0.0242474
Ndufs5	NADH dehydrogenase [ubiquinone] iron-sulfur protein 5	Q99LY9		0.363133	0.423335	0.393234	0.0301012	0.0243185
Upf3b	Protein Upf3b	Q3ULL6	0.522534	0.362306	0.228484	0.371108	0.084999	0.0243312
Rpl23a	60S ribosomal protein L23a	P62751	-0.37756	-0.223221	-0.519629	-0.37347	0.0855901	0.0243577
Safb	Scaffold attachment factor B1	D3YXK2	-0.174776	-0.0791098	-0.183336	-0.145741	0.0334069	0.0243668
Tjap1	Tight junction-associated protein 1	Q9DCD5	-0.61055	-0.266959	-0.420819	-0.432776	0.0993662	0.0244419
Pigo	GPI ethanolamine phosphate transferase 3	Q562G0		-1.07225	-1.25105	-1.16165	0.0894007	0.024449
Cdk2	Cyclin-dependent kinase 2	P97377	0.372541	0.434804		0.403672	0.0311314	0.0244997
Mrpl19	Mitochondrial ribosomal protein L19	Q6P8U3	-0.875162	-0.366804	-0.712997	-0.651654	0.149921	0.024533
	UPF0361 protein C3orf37 homolog	Q8R1M0	-1.304	-0.547647	-1.02588	-0.959176	0.220873	0.0245748
Blvra	Biliverdin reductase A	Q9CY64	0.719872	0.352934	0.409672	0.494159	0.114039	0.0246737
Nisch	Nischarin	Q80TM9	0.223045	0.44783	0.534284	0.40172	0.0927578	0.0246992
Gpd2	Glycerol-3-phosphate dehydrogenase, mitochondrial	Q64521	0.5749	0.24123	0.510589	0.44224	0.102205	0.0247401
Sart3	Squamous cell carcinoma antigen recognized by T-cells 3	Q9JLI8	0.102931	0.1113	0.047145	0.0871253	0.0201356	0.0247406
Phf23	PHD finger protein 23	Q8BSN5	-0.618595	-0.587864	-1.14664	-0.784367	0.181355	0.0247607
Parp1	Putative uncharacterized protein	Q3TF18	0.185872	0.0778004	0.163999	0.142557	0.0329882	0.0247988
Chd4	Chromodomain-helicase-DNA-binding protein 4	Q6PDQ2	-0.079497	-0.0877976	-0.0369298	-0.0680748	0.0157558	0.0248076
Hmgb1	High mobility group protein B1	P63158	-0.354487	-0.14751	-0.290772	-0.264256	0.0612024	0.0248383
Aprt	Adenine phosphoribosyltransferase	P08030	-0.0413185		-0.0483326	-0.0448255	0.00350706	0.0248533
Sqstm1	Sequestosome-1	Q64337	-0.448073	-0.383626	-0.186534	-0.339411	0.0786698	0.0248743
Ppat	Amidophosphoribosyltransferase (Fragment)	Q3TKC5	-0.154228	-0.33496	-0.205774	-0.231654	0.0537534	0.0249257
Mrps35	28S ribosomal protein S35, mitochondrial	Q8BJZ4	-0.355664	-0.199416	-0.474433	-0.343171	0.0796362	0.0249293
Obsl1	Protein Obsl1	D3YYU8	0.396815	0.268671	0.172685	0.27939	0.0649224	0.0249914
Cops4	COP9 signalosome complex subunit 4	O88544	0.255292	0.14746	0.122693	0.175148	0.0407047	0.0249974
Mul1	Mitochondrial ubiquitin ligase activator of NFKB 1	Q8VCM5	0.636816	0.543886		0.590351	0.046465	0.0250018
Edf1	Endothelial differentiation-related factor 1	Q9JMG1	-0.242131	-0.195405	-0.412081	-0.283206	0.0658343	0.0250093
Eprs	Bifunctional glutamate/proline--tRNA ligase	Q8CGC7	0.0792016	0.0675253	0.139029	0.095252	0.0221465	0.0250179
Ubxn6	UBX domain-containing protein 6	Q99PL6	-0.626808	-1.11747	-0.54967	-0.764651	0.177812	0.0250249
Sec13	Protein SEC13 homolog	Q9D1M0	0.214398	0.0895739	0.192567	0.165513	0.038489	0.0250257
Brcc3	Lys-63-specific deubiquitinase BRCC36	P46737	0.818654	0.37588	0.502896	0.56581	0.131632	0.0250455
Sar1b	SAR1 gene homolog B (S. cerevisiae)	Q0VGU0	0.195411	0.331381	0.460952	0.329248	0.0766624	0.025085
Med16	Putative uncharacterized protein	Q3UET8	-0.268244		-0.228959	-0.248601	0.0196427	0.0250984
Fam160a2	FTS and Hook-interacting protein	Q3U2I3	0.321292		0.376443	0.348867	0.0275755	0.025108
Lman2	Vesicular integral-membrane protein VIP36	Q9DBH5	0.262221	0.262928	0.502164	0.342438	0.0798635	0.0251608
Chid1	Chitinase domain-containing protein 1	Q922Q9		0.569525	0.667668	0.618597	0.0490719	0.0251981
Rpl32	60S ribosomal protein L32	P62911	-0.406566	-0.174479	-0.400891	-0.327312	0.0764342	0.0252208
Prim2	DNA primase large subunit	P33610	-0.206271	-0.167061	-0.085113	-0.152815	0.0356934	0.0252311
Fads1	Fatty acid desaturase 1	Q920L1	-0.171113		-0.200671	-0.185892	0.0147788	0.0252531
Marf1	Meiosis arrest female protein 1	Q8BJ34	0.119261	0.176284	0.270608	0.188718	0.0441304	0.0252853
Mak16	Protein MAK16 homolog	Q8BGS0		-0.389211	-0.456538	-0.422874	0.0336634	0.0252861
Coro7	Coronin-7	Q9D2V7	0.587959	0.250944	0.574748	0.471217	0.110203	0.0252902
Snx9	Putative uncharacterized protein	Q3TZU7	0.121402	0.276365	0.286368	0.228045	0.0533996	0.0253492
Glrx5	Glutaredoxin-related protein 5, mitochondrial	Q80Y14	0.160004	0.243017	0.106337	0.169786	0.0397582	0.02535
Nars	Asparagine--tRNA ligase, cytoplasmic	Q8BP47	-0.0427545	-0.0455506	-0.0191001	-0.0358018	0.00838972	0.0253844
Khdrbs1	KH domain-containing, RNA-binding, signal transduction-associated protein 1	Q60749	-0.243235	-0.463256	-0.239554	-0.315348	0.0739616	0.0254247
Fkbp14	Peptidyl-prolyl cis-trans isomerase FKBP14	P59024		1.32691	1.12979	1.22835	0.098558	0.0254853
Acad11	Acyl-CoA dehydrogenase family member 11	Q80XL6	0.75674	1.64091	0.982566	1.12674	0.265223	0.0255955
Mlst8	Target of rapamycin complex subunit LST8	Q9DCJ1	0.114567	0.123473	0.228881	0.15564	0.0367104	0.0256915
Rarg	Retinoic acid receptor gamma	P18911	-0.846468	-0.352042	-0.796877	-0.665129	0.157197	0.0257868
Rpl4	Ribosomal protein L4	Q564E8	-0.239428	-0.172321	-0.384988	-0.265579	0.0627685	0.025788
Pepd	Xaa-Pro dipeptidase	Q11136	0.0654069	0.0359029	0.0871797	0.0628298	0.0148583	0.0258161
Aldh4a1	Delta-1-pyrroline-5-carboxylate dehydrogenase, mitochondrial	Q8CHT0	0.42463	1.04237	0.894836	0.787278	0.186258	0.0258362
Man2c1	Putative uncharacterized protein (Fragment)	Q3TBQ3	0.840374	0.34955	0.794463	0.661462	0.156518	0.0258442
Tnip1	Putative uncharacterized protein	Q3UXR9	0.887169	0.434887	0.487732	0.603263	0.142771	0.0258522
Rpl10	Putative uncharacterized protein	Q3THJ6	-0.245849	-0.183097	-0.404036	-0.277661	0.0657331	0.0258673
Ankrd52	Serine/threonine-protein phosphatase 6 regulatory ankyrin repeat subunit C	Q8BTI7	-0.888431	-0.401792	-0.977874	-0.756032	0.178992	0.0258699
Cmpk1	UMP-CMP kinase	Q9DBP5	0.228577	0.109003	0.267978	0.201852	0.0477979	0.0258788
Setd3	Histone-lysine N-methyltransferase setd3	Q91WC0	0.513563	0.288887	0.246592	0.349681	0.0828457	0.0259035
Ssr4	Signal sequence receptor, delta, isoform CRA_b	Q3TVJ8	0.882521	0.493936	0.425191	0.600549	0.142376	0.0259353
Rbm26	RNA-binding protein 26	Q6NZN0	-0.155203	-0.0642645	-0.145785	-0.121751	0.0288713	0.0259473
Inppl1	Phosphatidylinositol 3,4,5-trisphosphate 5-phosphatase 2	Q6P549	0.322163	0.54589	0.25222	0.373424	0.0885651	0.0259544
Kif20b	Kinesin-like protein KIF20B	Q80WE4	-0.642278	-0.260257	-0.52677	-0.476435	0.113115	0.026005
Npc1	Niemann-Pick C1 protein	O35604	0.807743	1.58051	0.82645	1.07157	0.254529	0.0260271
Wdtc1	WD and tetratricopeptide repeats protein 1	Q80ZK9	-0.135782	-0.0856346	-0.201244	-0.140887	0.0334711	0.026036
Surf6	Surfeit locus protein 6	P70279	-0.228486	-0.286651	-0.491506	-0.335548	0.0797665	0.0260657
Scaf8	Protein SCAF8	Q6DID3	-1.51062	-0.628357	-1.07502	-1.07133	0.254694	0.0260688
Cltb	Putative uncharacterized protein	Q3TJ95	0.495826	0.234561	0.579067	0.436485	0.103782	0.0260754
Psmc6	26S protease regulatory subunit 10B	P62334	-0.129535	-0.0615924	-0.0733158	-0.0881479	0.0209687	0.0260982
Cyb5b	Putative uncharacterized protein	Q3TN44	0.349815	0.177416	0.438988	0.322073	0.0767727	0.0261975
Haus3	HAUS augmin-like complex subunit 3	Q8QZX2	0.193226	0.35283	0.17202	0.239359	0.0570649	0.0262049
Lyar	Cell growth-regulating nucleolar protein	Q08288	-0.564832	-0.401731	-0.234084	-0.400216	0.0954817	0.0262391
Gyg	Glycogenin, isoform CRA_a	Q3TWR9	0.721178	0.319016	0.449218	0.496471	0.118474	0.0262506
Mtx1	Metaxin-1	P47802	0.174182	0.0701575	0.144797	0.129712	0.0309621	0.0262639
Casp3	Caspase-3	P70677	0.174223	0.163005	0.326835	0.221355	0.0528397	0.0262665
Slfn9	Putative uncharacterized protein	Q8CB82	0.626471	0.609935	0.260976	0.499127	0.119171	0.0262763
Glrx3	Glutaredoxin-3	Q9CQM9	-0.136061	-0.234051	-0.108454	-0.159522	0.0381069	0.0263012
Clstn1	Calsyntenin-1	Q9EPL2		-0.411163	-0.485544	-0.448353	0.0371902	0.026343
Nsmce2	E3 SUMO-protein ligase NSE2	Q91VT1	-0.286165	-0.533585	-0.263819	-0.36119	0.0864385	0.0263895
Rgs10	Regulator of G-protein signalling 10	Q32MD7	-0.484767	-0.407851	-0.860586	-0.584401	0.139866	0.0263928
Xrcc6	X-ray repair cross-complementing protein 6	P23475	0.161372	0.136749	0.287804	0.195308	0.0467908	0.026442
Nelfa	Putative uncharacterized protein	Q3UK41	-0.342291	-0.142349	-0.335432	-0.273357	0.065534	0.0264753
Cmss1	Protein CMSS1	Q9CZT6		-0.849037	-0.718029	-0.783533	0.0655036	0.0265491
Kdm3b	Jumonji domain containing 1B	B9EKS2	-0.0990004	-0.242767	-0.227086	-0.189618	0.0455342	0.0265566
Dpysl4	Dihydropyrimidinase-related protein 4	O35098	0.111564	0.0521995	0.063486	0.0757499	0.0182012	0.0265858
Cic	Protein capicua homolog	Q924A2	0.333033	0.397156	0.705908	0.478699	0.115103	0.0266203
Stk25	Putative uncharacterized protein	Q3U6Y0	0.107623	0.090974		0.0992987	0.00832469	0.0266232
Rps18	40S ribosomal protein S18	P62270	-0.166549	-0.174465	-0.332319	-0.224444	0.0539858	0.026637
Stx6	Putative uncharacterized protein	Q3TX70	0.135222	0.284413	0.158201	0.192612	0.0463776	0.0266884
Rps19bp1	Active regulator of SIRT1	Q8C6B9	-1.35444	-0.566338	-0.918497	-0.946423	0.227932	0.0266992
Irak4	Interleukin-1 receptor-associated kinase 4	Q3USX5	0.779812		0.658695	0.719253	0.0605583	0.0267374
Ogfr	Putative uncharacterized protein	Q3UF10	0.365903	0.268848	0.148343	0.261031	0.0629258	0.0267464
Pea15	Astrocytic phosphoprotein PEA-15	Q62048		0.498185	0.590166	0.544176	0.0459904	0.0268378
Bcl9l	B-cell CLL/lymphoma 9-like protein	Q67FY2	-0.668508	-0.46581	-1.07107	-0.73513	0.177871	0.026929
Ccdc93	Coiled-coil domain-containing protein 93	Q7TQK5	0.452436	0.273266	0.200703	0.308801	0.0748097	0.0269904
Ckb	Creatine kinase B-type	Q04447	0.526417	0.983616	1.31282	0.940952	0.228016	0.027004
Nup205	MCG21756, isoform CRA_a (Fragment)	Q6ZQG1	-0.27659	-0.109439	-0.225302	-0.203777	0.049438	0.0270623
Adat1	tRNA-specific adenosine deaminase 1	Q9JHI2	0.411418	0.974911	0.637574	0.674634	0.163719	0.0270765
Hibch	3-hydroxyisobutyryl-CoA hydrolase, mitochondrial	Q8QZS1	1.00827	0.465777	0.574376	0.682809	0.165724	0.027083
Cryzl1	Quinone oxidoreductase-like protein 1	Q921W4	0.369986	0.518762	0.210466	0.366405	0.0890153	0.0271309
Zwint	ZW10 interactor	Q9CQU5	-0.43919		-0.369784	-0.404487	0.0347028	0.0272426
Pdgfrb	Platelet-derived growth factor receptor beta	P05622	-0.949152	-0.382265	-0.900688	-0.744035	0.181425	0.0273155
Polr1a	DNA-directed RNA polymerase I subunit RPA1	O35134	-0.312786	-0.151848	-0.386963	-0.283866	0.0693953	0.0274445
Fam21	WASH complex subunit FAM21	Q6PGL7	0.819549	0.328781	0.775812	0.64138	0.156809	0.027449
Urgcp	Up-regulator of cell proliferation	Q5NCI0	-0.108319		-0.128827	-0.118573	0.0102536	0.0274576
Cpt1a	Carnitine O-palmitoyltransferase 1, liver isoform	P97742	1.06085	0.419744	0.963625	0.814741	0.199483	0.0275224
Rfc5	Putative uncharacterized protein	Q3UDK3		0.314771	0.264488	0.289629	0.0251416	0.0275622
Snap23	Synaptosomal-associated protein 23	O09044	0.491698	0.193617	0.375023	0.353446	0.0867223	0.0276299
Nsun5	Putative methyltransferase NSUN5	Q8K4F6	-0.596093	-0.906296	-1.41461	-0.972332	0.23858	0.0276313
Yars	Tyrosine--tRNA ligase, cytoplasmic	Q91WQ3	0.0983665	0.155995	0.0662682	0.106877	0.0262492	0.0276796
Mis18a	Putative uncharacterized protein	Q9D086	0.928621	0.656297	0.373014	0.652644	0.1604	0.0277142
Mroh1	Protein Mroh1	E0CZ22	1.06177	0.416261	0.818049	0.765361	0.188196	0.0277395
Mrps22	28S ribosomal protein S22, mitochondrial	Q9CXW2	-0.531709	-0.231174	-0.32242	-0.361767	0.0889599	0.0277419
Prpf6	Pre-mRNA-processing factor 6	Q91YR7	0.133102	0.273912	0.14402	0.183678	0.0452272	0.0278098
Nadk	NAD kinase	P58058	-0.539698	-1.35403	-0.966844	-0.953524	0.235172	0.0278935
Phpt1	14 kDa phosphohistidine phosphatase	Q9DAK9	0.303676	0.120799	0.289876	0.238117	0.058794	0.0279513
Tmem87a	Transmembrane protein 87A	Q8BXN9	0.855066	0.381596	0.495772	0.577478	0.142654	0.0279755
Slc9a3r1	Na(+)/H(+) exchange regulatory cofactor NHE-RF1	P70441	0.205459	0.122797	0.302551	0.210269	0.0519461	0.027979
Pex14	Peroxisomal membrane protein PEX14	Q9R0A0	0.218145	0.15734	0.086434	0.153973	0.0380589	0.0280067
Nop14	Nucleolar protein 14	Q8R3N1	-0.721269	-0.284851	-0.678147	-0.561422	0.138845	0.0280337
Cenpf	Protein Cenpf	E9Q3P4	0.442469	0.821287	0.387749	0.550501	0.136311	0.0280969
Nt5dc3	5'-nucleotidase domain-containing protein 3	Q3UHB1	0.289436	0.590543	0.305182	0.395054	0.0978503	0.0281127
Sh3bp4	SH3 domain-binding protein 4	Q921I6	-0.169625	-0.374441	-0.211443	-0.251837	0.0624796	0.0281975
Aplp2	Putative uncharacterized protein	Q3UDL6	-0.322219	-0.585513	-0.270725	-0.392819	0.0974869	0.0282136
Rbbp8	DNA endonuclease RBBP8	Q80YR6	-0.386911	-0.729223	-0.347846	-0.487993	0.121141	0.0282282
Whsc1	Histone-lysine N-methyltransferase NSD2	Q8BVE8	-0.159719	-0.355594	-0.414104	-0.309805	0.0769207	0.0282374
Nacc1	Nucleus accumbens-associated protein 1	Q7TSZ8	-0.748177	-0.577919	-1.29804	-0.874713	0.217296	0.0282652
Ube3d	E3 ubiquitin-protein ligase E3D	Q8BX13	-2.17997	-5.44709	-3.74053	-3.7892	0.943448	0.0283829
Dnajc5	DnaJ homolog subfamily C member 5	P60904	0.76183	0.343261	0.430379	0.511823	0.127508	0.0284123
Paics	Multifunctional protein ADE2	Q9DCL9	-0.245555	-0.132306	-0.114679	-0.16418	0.0410044	0.0285437
Hnrnpf	Heterogeneous nuclear ribonucleoprotein F	Q9Z2X1		-0.162089	-0.194119	-0.178104	0.0160149	0.0285453
Pltp	Phospholipid transfer protein	P55065	-0.913968	-0.763051		-0.838509	0.0754586	0.0285682
Gmps	GMP synthase [glutamine-hydrolyzing]	Q3THK7	-0.170191	-0.42707	-0.292099	-0.296453	0.0741867	0.0286473
Dpp7	Dipeptidyl peptidase 2	Q9ET22	0.776009	1.40339	0.639667	0.939689	0.235167	0.0286501
Ccdc137	Coiled-coil domain-containing protein 137	Q8R0K4	-0.477393	-0.851098	-1.21252	-0.847003	0.212222	0.0287122
Rplp0	60S acidic ribosomal protein P0	P14869	-0.176105	-0.258863	-0.419174	-0.284714	0.0713486	0.0287208
Dnajb6	DnaJ homolog subfamily B member 6	O54946	-0.225768	-0.409385	-0.186676	-0.273943	0.0686549	0.028725
Fryl	Protein Fryl	F8VQ05	0.0250571	0.0634369	0.0622214	0.0502385	0.0125956	0.0287456
Cs	Citrate synthase, mitochondrial	Q9CZU6	0.099309	0.257445	0.236331	0.197695	0.0495691	0.0287497
Anln	Actin-binding protein anillin	Q8K298	-0.167154	-0.131368	-0.294782	-0.197768	0.0495949	0.0287575
Ate1	Arginyl-tRNA--protein transferase 1	Q4FCQ6	0.127371	0.333063	0.257063	0.239166	0.0600487	0.0288212
Eno1	Alpha-enolase	P17182	0.123297	0.050373	0.0795148	0.0843951	0.0211924	0.0288283
Clk3	Dual specificity protein kinase CLK3	O35492	-0.424404		-0.353586	-0.388995	0.035409	0.0288951
Prune	Protein prune homolog	Q8BIW1	0.304592	0.644637	0.33947	0.429566	0.108006	0.0288955
Acadsb	Putative uncharacterized protein (Fragment)	Q3V2R9	0.506783	1.2052	0.736868	0.816284	0.205489	0.0289602
Atp6v0d1	V-type proton ATPase subunit d 1	P51863		0.286367	0.343866	0.315116	0.0287493	0.0289605
S100a4	Protein S100-A4	P07091	0.401748	0.160673	0.408209	0.323543	0.0814565	0.0289659
Plaur	Urokinase plasminogen activator surface receptor	P35456	0.478111	1.22682	0.870251	0.858394	0.216215	0.028991
Cd3eap	DNA-directed RNA polymerase I subunit RPA34	Q76KJ5	-0.402775	-0.190845	-0.210856	-0.268159	0.0675557	0.0289997
Sae1	SUMO-activating enzyme subunit 1	Q9R1T2	-0.328037	-0.359936	-0.137764	-0.275245	0.069355	0.0290104
Sidt2	Putative uncharacterized protein	Q3U1L8	0.633676	0.52751		0.580593	0.0530826	0.0290218
Bad	Putative uncharacterized protein (Fragment)	Q3TFU7	0.677265	0.718845	0.277622	0.557911	0.140657	0.0290397
Mat2b	Methionine adenosyltransferase 2 subunit beta	Q99LB6	0.467001	0.17697	0.364848	0.336273	0.084935	0.0291374
Wnt7a	Protein Wnt-7a	P24383	-5.14545	-3.52534	-2.02597	-3.56558	0.900742	0.0291466
Trim25	Putative uncharacterized protein	Q3TU94	0.202445	0.0867595	0.119528	0.136244	0.0344257	0.0291582
Cops2	COP9 signalosome complex subunit 2	P61202	0.089028	0.223808	0.227341	0.180059	0.0455269	0.0291936
Ikbkap	Elongator complex protein 1	Q7TT37	0.14618	0.239808	0.100371	0.16212	0.0410334	0.0292489
Acp1	Acid phosphatase 1, soluble	Q4VAI2	0.178578	0.207737	0.387472	0.257929	0.0653161	0.0292757
Tgs1	Trimethylguanosine synthase	Q923W1	-0.199398	-0.530229	-0.443	-0.390875	0.0989949	0.0292824
Rassf8	Ras association domain-containing protein 8	Q8CJ96	-0.355266	-0.29524		-0.325253	0.0300132	0.0292895
Pdcd6	Programmed cell death protein 6	P12815	0.346627	0.244387	0.134422	0.241812	0.0612719	0.0293082
Prpf4b	Serine/threonine-protein kinase PRP4 homolog	Q61136	-0.176182	-0.0661946	-0.146333	-0.12957	0.0328382	0.0293196
Actr3	Putative uncharacterized protein	Q3TGE1	0.160495	0.060274	0.133628	0.118132	0.0299508	0.0293397
Sf1	Putative uncharacterized protein	Q3UI45	-0.237171	-0.526178	-0.288764	-0.350704	0.0889918	0.0293854
Tubgcp2	Putative uncharacterized protein	Q3TIB7	0.265357	0.219487	0.485648	0.323497	0.0821493	0.0294255
Midn	Midnolin	Q3TPJ7	-0.918179	-0.462359	-1.22061	-0.867048	0.220375	0.0294734
Fkbp2	Peptidyl-prolyl cis-trans isomerase FKBP2	P45878	0.337732		0.280209	0.30897	0.0287612	0.0295454
Vps16	Putative uncharacterized protein	Q8BWV2	0.137625	0.278591	0.365265	0.260494	0.0663343	0.0295754
Tomm34	Mitochondrial import receptor subunit TOM34	Q9CYG7	0.24922	0.145732	0.370678	0.25521	0.0650052	0.029589
Pgk1	Phosphoglycerate kinase 1	P09411	0.074448	0.165873	0.0909394	0.11042	0.0281322	0.029602
Hip1	Huntingtin-interacting protein 1	Q8VD75	0.216712	0.479595	0.260658	0.318988	0.0812992	0.0296215
Ddx31	DEAD/H (Asp-Glu-Ala-Asp/His) box polypeptide 31	Q6NZQ2	-0.551362	-0.215974	-0.3727	-0.380012	0.0968871	0.0296411
Zc3h18	Zinc finger CCCH domain-containing protein 18	Q0P678	0.214883	0.380741	0.166804	0.254143	0.0648031	0.0296472
Pygb	Phosphorylase	Q3UGT5	0.902191	0.352026	0.901399	0.718539	0.183257	0.0296586
Xpa	DNA repair protein complementing XP-A cells homolog	Q64267	-0.496798	-0.242891	-0.247046	-0.328912	0.083952	0.0297013
Cog6	Putative uncharacterized protein	Q8BRB0		0.478141	0.396211	0.437176	0.0409651	0.02974
Med4	Mediator of RNA polymerase II transcription subunit 4	Q9CQA5	-0.135487	-0.347245	-0.235532	-0.239421	0.0611603	0.0297457
Lamp1	Lysosome-associated membrane glycoprotein 1	P11438	0.597614	0.306482	0.283189	0.395762	0.10115	0.0297738
Foxc2	Forkhead box protein C2	Q61850	-0.624902		-0.754397	-0.689649	0.0647476	0.0297971
Nup93	Nuclear pore complex protein Nup93	Q8BJ71	-0.171237	-0.0732217	-0.0991665	-0.114542	0.0293205	0.0298584
Mrps15	28S ribosomal protein S15, mitochondrial	Q9DC71	-0.668109	-0.247892	-0.532424	-0.482808	0.123817	0.0299586
Vimp	Selenoprotein S	Q9BCZ4	-0.159921	-0.41133	-0.413705	-0.328319	0.0842016	0.0299611
Rcn1	Reticulocalbin-1	Q05186	0.257447	0.10077	0.262277	0.206832	0.053049	0.0299655
Wls	Protein wntless homolog	Q6DID7	-0.226225	-0.563893	-0.599757	-0.463292	0.118985	0.0300381
Rnd3	Rho-related GTP-binding protein RhoE	P61588	-1.36679	-1.05367	-0.508524	-0.976328	0.250759	0.0300412
Cstf3	Cleavage stimulation factor subunit 3	Q99LI7	0.179341	0.445554	0.477064	0.36732	0.0944286	0.0300915
Idh2	Isocitrate dehydrogenase [NADP], mitochondrial	P54071	0.410738	0.182631	0.495302	0.36289	0.093377	0.0301427
Srm	Putative uncharacterized protein	Q3UJL7	-0.740185	-0.396819	-0.334112	-0.490372	0.126211	0.0301565
Strbp	Spermatid perinuclear RNA-binding protein	Q91WM1	-0.505399		-0.417665	-0.461532	0.0438668	0.0301635
Rpl12	60S ribosomal protein L12	P35979	-0.474664	-0.174858	-0.418959	-0.35616	0.0920663	0.0303955
Rhot1	Mitochondrial Rho GTPase 1	Q8BG51	0.62178	0.304092	0.303536	0.409803	0.105989	0.0304248
Jmy	Junction-mediating and -regulatory protein	Q9QXM1	0.832598	1.06346	0.391043	0.762367	0.197261	0.0304493
Letm1	LETM1 and EF-hand domain-containing protein 1, mitochondrial	Q9Z2I0	0.506311	0.190518	0.361001	0.35261	0.0912582	0.0304622
Coro1c	Coronin	Q3TEU8	0.0924813	0.237967	0.2448	0.191749	0.0496732	0.0305147
Cars2	Probable cysteine--tRNA ligase, mitochondrial	Q8BYM8	0.358508	0.710552	0.335788	0.468283	0.121312	0.0305157
5031439G07Rik	Protein 5031439G07Rik	B1APX2		0.310932	0.256371	0.283651	0.0272804	0.0305199
Mrpl48	39S ribosomal protein L48, mitochondrial	Q8JZS9	-0.384767		-0.46671	-0.425738	0.0409715	0.0305389
Kctd10	BTB/POZ domain-containing adapter for CUL3-mediated RhoA degradation protein 3	Q922M3	-1.33124	-0.556937	-0.776942	-0.888373	0.230361	0.0305692
Ppan	Suppressor of SWI4 1 homolog	Q91YU8	-0.871619	-0.505676	-1.31	-0.895764	0.232501	0.0306228
Vps13b	Vacuolar protein sorting-associated protein 13B	Q80TY5	-0.722917	-1.98274	-1.64026	-1.44864	0.37609	0.0306355
Tanc1	Protein TANC1	Q0VGY8	-0.12238	-0.156243	-0.281978	-0.186867	0.0485498	0.030677
Golga3	Golgin subfamily A member 3	P55937	0.0732838	0.173839	0.200751	0.149291	0.0387897	0.0306806
Yap1	Yorkie homolog	P46938	-0.409735	-0.780061	-1.09466	-0.761486	0.197939	0.0307048
Pex5	Peroxisomal targeting signal 1 receptor	O09012	0.378762	0.512675	0.189722	0.360387	0.0936802	0.030706
Sf3b14	Pre-mRNA branch site protein p14	P59708	-0.277392	-0.595234	-0.303192	-0.39194	0.10192	0.0307265
Scyl2	SCY1-like protein 2	Q8CFE4	-0.791353	-0.825387	-0.308538	-0.641759	0.1669	0.0307324
Ppp1r2	Putative uncharacterized protein	Q8BVM6	0.15139	0.403428	0.284128	0.279649	0.0727915	0.0307818
Ptbp1	Putative uncharacterized protein	Q3T984	-0.376446	-0.685451	-0.298484	-0.45346	0.118158	0.0308408
Gmds	GDP-mannose 4,6 dehydratase	Q8K0C9	-0.107444	-0.223803	-0.110147	-0.147131	0.0383437	0.0308489
Rps7	40S ribosomal protein S7	P62082	-0.492356	-0.346469	-0.184276	-0.341034	0.0889767	0.0309124
Cep135	Putative uncharacterized protein	Q3UVI6	0.427633	0.623018	0.235535	0.428729	0.111858	0.030913
Nup155	Putative uncharacterized protein	Q3UL43	0.11211	0.111445	0.230184	0.151246	0.0394694	0.0309248
Acad9	Acyl-CoA dehydrogenase family member 9, mitochondrial	Q8JZN5	0.0966517	0.253227	0.169648	0.173176	0.045234	0.030977
No66	Bifunctional lysine-specific demethylase and histidyl-hydroxylase NO66	Q9JJF3	-0.495135	-0.233934	-0.642271	-0.457113	0.1194	0.0309774
Rdh13	Retinol dehydrogenase 13	Q8CEE7	0.439819	0.859334	0.396123	0.565092	0.147661	0.0309988
Nup153	Nucleoporin 153	Q80WR0	-0.397456	-0.227372	-0.595122	-0.40665	0.10626	0.0309991
B2m	Beta-2-microglobulin	P01887		0.185867	0.152772	0.169319	0.0165476	0.03101
	Uncharacterized protein C1orf198 homolog	Q8C3W1	-0.288733	-0.307938	-0.614587	-0.403753	0.105563	0.0310311
Pdia5	Protein disulfide-isomerase A5	Q921X9	0.535068	0.193719	0.424806	0.384531	0.100576	0.0310528
Metap1d	Methionine aminopeptidase 1D, mitochondrial	Q9CPW9	0.569061		0.46757	0.518315	0.0507453	0.0310649
Idi1	Isopentenyl-diphosphate Delta-isomerase 1	P58044	-0.916551	-0.357546	-0.585614	-0.619904	0.162279	0.0311018
Cul7	Cullin-7	Q8VE73	0.506927	0.565775	0.205215	0.425972	0.111678	0.0311865
Nemf	Nuclear export mediator factor Nemf	Q8CCP0	-0.431684	-0.17077	-0.267877	-0.29011	0.0761354	0.0312433
Rrm2	Ribonucleoside-diphosphate reductase subunit M2	P11157	0.337449	0.901735	0.620166	0.619783	0.162895	0.0313277
Slu7	Pre-mRNA-splicing factor SLU7	Q8BHJ9	-0.295741	-0.685629	-0.824774	-0.602048	0.158333	0.0313635
Hltf	Helicase-like transcription factor	Q6PCN7	-0.372739	-0.482509	-0.871986	-0.575744	0.151472	0.0313847
Cyb5a	Cytochrome b5	P56395	0.325926	0.53504	0.840246	0.567071	0.149333	0.0314391
Nufip2	Nuclear fragile X mental retardation-interacting protein 2	Q5F2E7	-0.620891	-0.255535	-0.359852	-0.412093	0.108655	0.03151
Commd9	COMM domain-containing protein 9	Q8K2Q0		0.529308	0.646078	0.587693	0.0583852	0.0315195
Kiaa1467	Uncharacterized protein KIAA1467	Q8BYI8	0.65328	0.580457	0.234765	0.489501	0.129091	0.0315214
Znf706	Zinc finger protein 706	Q9D115	-0.627504		-0.514056	-0.57078	0.056724	0.03153
Thoc7	THO complex subunit 7 homolog	Q7TMY4	-0.182251	-0.0955635	-0.0811644	-0.11966	0.0315706	0.0315467
Ahnak2	Protein Ahnak2 (Fragment)	E9PYB0	1.42125	0.661916	0.709087	0.93075	0.245626	0.0315607
Stip1	Putative uncharacterized protein	Q3THQ5	0.0403433	0.0758457	0.108985	0.0750581	0.0198191	0.0315931
Stk38	Serine/threonine-protein kinase 38	Q91VJ4	0.0687736	0.188156	0.135388	0.130772	0.03454	0.0316088
Chchd6	Putative uncharacterized protein	Q3TJS8	0.259158	0.274648	0.100015	0.211274	0.0558087	0.0316155
Cd2ap	CD2-associated protein	Q9JLQ0	-0.0995268	-0.114459	-0.0409103	-0.0849653	0.0224453	0.0316191
Mrpl47	39S ribosomal protein L47, mitochondrial	Q8K2Y7	-0.767093	-0.309357	-0.454852	-0.510434	0.135028	0.0316985
Larp1	La-related protein 1	Q6ZQ58	-0.33045	-0.194016	-0.508698	-0.344388	0.0911078	0.0317016
Gpatch4	G patch domain-containing protein 4	Q3TFK5	-0.455478	-1.16648	-0.726831	-0.78293	0.207156	0.0317106
Wdr77	Methylosome protein 50	Q99J09	-0.238596	-0.0848848	-0.195778	-0.173087	0.0458003	0.0317145
Sdad1	Protein SDA1 homolog	Q80UZ2	-0.704928	-0.27219	-0.751239	-0.576119	0.152552	0.0317542
Erp44	Putative uncharacterized protein	Q3URM4	0.134009	0.13398	0.279049	0.182346	0.0483515	0.031835
Mtmr9	Putative uncharacterized protein	Q3U896	0.253244	0.408382	0.1593	0.273642	0.0726234	0.0318855
Golim4	Golgi integral membrane protein 4	D3YVW2	-0.610568	-0.436361	-1.06367	-0.703532	0.186959	0.0319613
Rrp1b	Ribosomal RNA processing protein 1 homolog B	Q91YK2	-0.229792	-0.121913	-0.100283	-0.150663	0.0400544	0.0319856
Glo1	Lactoylglutathione lyase	Q9CPU0		0.359532	0.293655	0.326593	0.0329382	0.0319946
Mrps5	Putative uncharacterized protein	Q3U2U4	-1.16077	-0.571314	-0.541967	-0.758017	0.201554	0.0319949
Mtif3	Translation initiation factor IF-3, mitochondrial	Q9CZD5		-0.360126	-0.294127	-0.327126	0.0329994	0.0320018
Rnmtl1	RNA methyltransferase-like protein 1	Q5ND52	-0.542735		-0.443002	-0.492868	0.0498663	0.032096
Wdr3	WD repeat-containing protein 3	Q8BHB4	-0.597134	-0.236854	-0.357823	-0.397271	0.105857	0.0321181
Trim26	Putative uncharacterized protein	Q3UFX3		1.28018	1.5687	1.42444	0.14426	0.0321272
Specc1l	Cytospin-A	Q2KN98		0.268459	0.328981	0.29872	0.0302615	0.0321364
Smarcad1	SWI/SNF-related matrix-associated actin-dependent regulator of chromatin subfamily A containing DEAD/H box 1	Q04692	-0.405116	-0.433516	-0.155415	-0.331349	0.0883481	0.0321552
Nfyc	Nuclear transcription factor Y subunit gamma	P70353	-0.362784	-0.477847	-0.169932	-0.336855	0.089828	0.0321629
Laptm4a	Lysosomal-associated transmembrane protein 4A	Q60961	-1.25212		-1.53523	-1.39367	0.141554	0.0322198
Msn	Moesin	P26041	0.250162	0.0878896	0.208341	0.182131	0.0486427	0.0322522
Nqo1	NAD(P)H dehydrogenase, quinone 1	Q542Y0		0.398483	0.488736	0.443609	0.0451265	0.0322693
Tnks	Tankyrase-1	Q6PFX9	-0.239828	-0.0845121	-0.18871	-0.171017	0.0457003	0.0322853
Gja1	Gap junction alpha-1 protein	P23242	-1.19238	-0.640413	-0.510863	-0.781219	0.208955	0.0323392
Zmym4	Zinc finger MYM-type protein 4	A2A791	-0.567658	-0.728534	-0.256777	-0.517656	0.13846	0.0323397
Rps2	40S ribosomal protein S2	P25444	-0.233987	-0.601021	-0.367294	-0.400767	0.107267	0.032379
Fam32a	Protein FAM32A	Q9CR80	-0.867541	-0.581308	-0.320761	-0.58987	0.1579	0.0323858
Mrps10	Mrps10 protein (Fragment)	Q501J4	-0.447692	-0.284169	-0.169952	-0.300604	0.0805967	0.0324799
Anks1a	Ankyrin repeat and SAM domain-containing protein 1A	P59672	-0.0416954	-0.0880149	-0.0421441	-0.0572848	0.0153656	0.0325053
Calcoco1	Calcium-binding and coiled-coil domain-containing protein 1	Q8CGU1	-0.385026	-0.197264	-0.547146	-0.376479	0.101093	0.0325689
Carhsp1	Putative uncharacterized protein	Q3U434	0.556347	1.22155	0.607694	0.795198	0.213692	0.0326142
Ap2b1	Putative uncharacterized protein	Q5SWR1	0.256288		0.315084	0.285686	0.0293982	0.0326404
Camk2d	Calcium/calmodulin-dependent protein kinase type II subunit delta	Q6PHZ2	0.223607	0.150914	0.0818235	0.152115	0.0409337	0.0326954
Myl6b	Myosin light chain 6B	Q8CI43	0.366573	0.687624	1.00706	0.687087	0.184894	0.0326956
Hist1h1b	Hist1h1b protein (Fragment)	Q1WWK3	-1.15679	-1.37481	-0.476633	-1.00274	0.27048	0.0328364
Ipo7	Importin-7	Q9EPL8	-0.332902	-0.235848	-0.118722	-0.229157	0.0619189	0.0329385
Kiaa1429	Protein virilizer homolog	A2AIV2	-0.375989	-0.138282	-0.248222	-0.254165	0.0686845	0.0329459
Ap1g1	AP-1 complex subunit gamma-1	P22892	0.116115		0.143051	0.129583	0.0134682	0.0329651
Gdi2	Putative uncharacterized protein	Q3TIY6	0.0450567	0.029653	0.016589	0.0304329	0.00822718	0.0329684
ORF11	Probable ergosterol biosynthetic protein 28	Q9ERY9		0.792039	0.975867	0.883953	0.0919143	0.0329797
Dpp9	Dipeptidyl peptidase 9	Q8BVG4	0.0983786	0.12141	0.230008	0.149932	0.0405861	0.0330472
Prmt3	Putative uncharacterized protein (Fragment)	Q3U2K1	-0.257214	-0.448803	-0.179799	-0.295272	0.0799524	0.0330647
Gsr	Glutathione reductase, mitochondrial	P47791	0.0973366	0.203471	0.0951465	0.131985	0.0357489	0.0330825
Cmc2	COX assembly mitochondrial protein 2 homolog	Q8K199		0.305204	0.376526	0.340865	0.0356613	0.0331808
Supt6h	Transcription elongation factor SPT6	Q62383	0.0971047	0.233263	0.126745	0.152371	0.0413412	0.0331847
Sdha	Succinate dehydrogenase [ubiquinone] flavoprotein subunit, mitochondrial	Q8K2B3	0.0683771	0.194607	0.184463	0.149149	0.0404919	0.0332216
Lamc1	Laminin subunit gamma-1	F8VQJ3	-0.330771	-0.12505	-0.359738	-0.271853	0.0738763	0.03328
Pip4k2c	Phosphatidylinositol 5-phosphate 4-kinase type-2 gamma	Q91XU3	0.476559	0.197287	0.575223	0.416356	0.113177	0.0332971
Snrpa1	U2 small nuclear ribonucleoprotein A'	P57784	-0.297832	-0.572375	-0.245928	-0.372045	0.101279	0.0333846
Mettl2	Methyltransferase-like protein 2	Q8BMK1	-0.918181		-0.742937	-0.830559	0.087622	0.0334572
Aatf	Protein AATF	Q9JKX4	-1.04147	-0.462798	-0.520613	-0.674961	0.184014	0.0334744
Dnm1	Dynamin-1	P39053	0.974829	0.349458	0.981887	0.768724	0.209643	0.0334935
Fnbp4	Formin-binding protein 4	Q6ZQ03	-0.633602	-0.410341	-0.23148	-0.425141	0.116318	0.0336893
Mlec	Malectin	Q6ZQI3	0.288693	0.152026	0.425931	0.288883	0.0790698	0.0337137
Cpsf6	Cleavage and polyadenylation specificity factor subunit 6	Q6NVF9	-0.06103	-0.172906	-0.120149	-0.118028	0.0323132	0.0337284
Cog2	Putative uncharacterized protein	Q3TAN4	0.595961	0.742052	0.252273	0.530095	0.145172	0.0337472
Slc25a20	Solute carrier family 25 (Mitochondrial carnitine/acylcarnitine translocase), member 20	Q7TPW6	1.55107	0.598354	1.75568	1.3017	0.3566	0.0337671
Taf11	Transcription initiation factor TFIID subunit 11	Q99JX1	-0.748648	-0.378966	-0.326152	-0.484588	0.132907	0.0338379
Ddx18	ATP-dependent RNA helicase DDX18	Q8K363	-1.11434	-0.469356	-0.585766	-0.723154	0.198458	0.033875
Ambra1	Activating molecule in BECN1-regulated autophagy protein 1	A2AH22		-0.362199	-0.4491	-0.405649	0.0434505	0.0339657
Gprc5b	G-protein coupled receptor family C group 5 member B	Q923Z0	0.303084	0.375949		0.339517	0.0364323	0.0340265
Ahcyl1	Putative adenosylhomocysteinase 2	Q80SW1	-0.177246	-0.368493	-0.167491	-0.237743	0.0654354	0.0340533
Fam76a	Protein FAM76A	Q922G2	0.888591	0.400665	0.430937	0.573397	0.157839	0.0340608
Ak1	Adenylate kinase isoenzyme 1	Q9R0Y5	0.730603		0.588863	0.659733	0.0708699	0.0340629
Hnrnpul2	Heterogeneous nuclear ribonucleoprotein U-like protein 2	Q00PI9	0.0419195	0.0683248	0.111829	0.0740246	0.0203815	0.0340751
Klhdc4	Kelch domain-containing protein 4	G3UZ63	-0.204133	-0.49972	-0.270998	-0.32495	0.0894914	0.03409
Acox1	Putative uncharacterized protein (Fragment)	Q8BW35	0.848572	1.38142	0.515772	0.915255	0.252106	0.0341008
Mboat7	Lysophospholipid acyltransferase 7	Q8CHK3	1.09213	0.879996		0.986065	0.106069	0.0341088
Pgm2	Phosphoglucomutase 2	Q5RJV4	0.202905	0.567807	0.583825	0.451512	0.124389	0.0341111
Marcks	Myristoylated alanine-rich C-kinase substrate	P26645	-0.290341	-0.544274	-0.81514	-0.549918	0.151523	0.0341204
Clic1	Chloride intracellular channel 1, isoform CRA_c	Q542F1	0.115643	0.343884	0.29173	0.250419	0.0690494	0.0341646
Atp6v1e1	V-type proton ATPase subunit E 1	P50518	0.269604	0.351661	0.656042	0.425769	0.117548	0.0342425
Wwc2	Protein WWC2	Q6NXJ0	-0.12408	-0.299226	-0.158563	-0.193956	0.053568	0.0342652
Clcn7	H(+)/Cl(-) exchange transporter 7	O70496	1.31375	0.462157	0.893875	0.889927	0.245842	0.0342793
Kansl3	KAT8 regulatory NSL complex subunit 3	A2RSY1	-0.304629	-0.352776	-0.702789	-0.453398	0.125468	0.0343861
Lta4h	Leukotriene A-4 hydrolase	P24527	0.24904	0.638989	0.364941	0.417657	0.115613	0.0344055
Sdhb	Succinate dehydrogenase complex subunit B (Fragment)	Q0QEZ4	0.112	0.318421	0.322397	0.250939	0.0694791	0.0344194
Ap2s1	AP-2 complex subunit sigma	P62743	0.352568	0.395993	0.132895	0.293819	0.0814325	0.034481
Nol3	Apoptosis repressor interacting with CARD	Q53YU5	0.28691	0.860262	0.71325	0.62014	0.171935	0.0345034
Bsg	Basigin (Fragment)	O55107	-0.351577	-0.287139	-0.117297	-0.252004	0.0698753	0.0345092
Sec63	SEC63	Q80YG4	0.186788	0.245943	0.0828554	0.171862	0.0476671	0.0345269
Nkrf	NF-kappa-B-repressing factor	Q8BY02	-0.404928	-0.285074	-0.723035	-0.471012	0.130675	0.0345442
Mccc1	Methylcrotonoyl-CoA carboxylase subunit alpha, mitochondrial	Q99MR8	0.654979	0.287921	0.856604	0.599835	0.166464	0.0345625
Ddb1	DNA damage-binding protein 1	Q3U1J4	-0.57252	-0.192266	-0.517715	-0.4275	0.118676	0.0345824
Sirt2	NAD-dependent protein deacetylase sirtuin-2	Q8VDQ8	0.0881124	0.263781	0.234465	0.195453	0.0543334	0.0346679
Ppp1r14a	Protein phosphatase 1 regulatory subunit 14A	Q91VC7		0.52223	0.419177	0.470703	0.0515266	0.0347063
Agphd1	Hydroxylysine kinase	Q5U5V2	0.468886	1.38382	1.31471	1.0558	0.294136	0.0348032
Fads3	Fatty acid desaturase 3, isoform CRA_a	Q3T9H9	-0.184045	-0.495015	-0.298073	-0.325711	0.0908267	0.0348629
Gid4	Glucose-induced degradation protein 4 homolog	Q9CPY6	0.111968	0.0897518		0.10086	0.0111083	0.0349166
Bcat1	Branched-chain-amino-acid aminotransferase, cytosolic	P24288	-0.242181	-0.629681	-0.360113	-0.410658	0.114681	0.0349539
Actl6a	Putative uncharacterized protein	Q3TF62	-0.207432	-0.069	-0.187457	-0.15463	0.0432013	0.0349819
Itsn2	MKIAA1256 protein (Fragment)	Q80TG5		0.280189	0.224466	0.252328	0.0278614	0.0350052
Strn	Striatin	O55106	0.321582	0.536543	0.199256	0.35246	0.0985829	0.0350523
Casc5	Protein CASC5	A3KGI3	0.274075	0.142285	0.40879	0.27505	0.0769347	0.0350552
Osbpl8	Oxysterol-binding protein	B9EJ86	0.458179	0.412088	0.151736	0.340668	0.0953985	0.0351276
Psmd7	26S proteasome non-ATPase regulatory subunit 7	P26516	0.107513	0.05168	0.047632	0.0689417	0.019321	0.0351766
Mll	Histone-lysine N-methyltransferase MLL	P55200	-0.12837	-0.306255	-0.390002	-0.274876	0.077139	0.0352624
Tarbp2	RISC-loading complex subunit TARBP2	P97473	-0.0970571	-0.283641	-0.195257	-0.191985	0.0538871	0.0352739
Rbm27	RNA-binding protein 27	Q5SFM8	-0.257566	-0.122627	-0.11479	-0.164994	0.0463411	0.0353149
Tmem173	Stimulator of interferon genes protein	Q3TBT3	2.01261	0.697346	1.3445	1.35149	0.379699	0.0353339
Vps45	Vacuolar protein sorting-associated protein 45	P97390	0.458956	0.753102	0.274624	0.495561	0.139332	0.0353813
Eif3k	Eukaryotic translation initiation factor 3 subunit K	Q9DBZ5	-0.164422	-0.0552122	-0.158511	-0.126048	0.0354592	0.0354161
Fam192a	Protein FAM192A	Q91WE2	-0.0692142	-0.0552932		-0.0622537	0.00696047	0.0354425
Glg1	E-selectin ligand 1	Q53WR6	-0.663678	-0.291197	-0.319905	-0.424927	0.119663	0.0354826
Dido1	Death-inducer obliterator 1	Q8C9B9	-0.326225	-0.106243	-0.277453	-0.23664	0.0667012	0.0355411
Psmd13	26S proteasome non-ATPase regulatory subunit 13	Q9WVJ2	0.0465683	0.126295	0.0752272	0.082697	0.0233163	0.0355594
Cpox	Coproporphyrinogen-III oxidase, mitochondrial	P36552	0.198723	0.544143	0.328437	0.357101	0.100739	0.0355942
Nol7	Nucleolar protein 7	Q9D7Z3	-0.226336	-0.695441	-0.597505	-0.506427	0.142871	0.0355971
Srp19	Signal recognition particle 19, isoform CRA_c	Q8BZ07	-0.203234	-0.0920421	-0.277393	-0.19089	0.0538611	0.0356068
Arhgef7	Rho guanine nucleotide exchange factor 7	Q9ES28	0.413618	0.134695	0.360329	0.302881	0.0854881	0.0356276
Snrnp27	U4/U6.U5 small nuclear ribonucleoprotein 27 kDa protein	Q8K194	0.619922	0.777244		0.698583	0.0786613	0.0356917
42988	Septin-10	Q8C650	0.850699	0.339387	0.453897	0.547994	0.15492	0.0357302
Ptpmt1	Putative uncharacterized protein	Q3U926	1.39731	1.11403		1.25567	0.141638	0.035754
Smc3	Cspg6	Q1HL32	-0.202631	-0.0889106	-0.270614	-0.187385	0.0530042	0.0357661
Gbf1	MKIAA0248 protein (Fragment)	Q6A099	0.0936129	0.0746147		0.0841138	0.00949911	0.0357956
Ggact	Gamma-glutamylaminecyclotransferase	Q923B0	0.996623	0.370937	0.580518	0.649359	0.183871	0.0358328
Copb1	Coatomer subunit beta	Q9JIF7	0.339465	0.157464	0.153238	0.216722	0.0613834	0.0358506
Lnpep	Lnpep protein	Q6NY09	0.152963	0.411881	0.472633	0.345826	0.0980131	0.0358919
Lsm7	U6 snRNA-associated Sm-like protein LSm7	Q9CQQ8	0.0292546		0.0367507	0.0330027	0.00374803	0.0359954
Clasp1	Clasp1 protein	A5D6Q8	-0.289917	-0.0944283	-0.21988	-0.201408	0.0571834	0.0360053
Cenpb	Major centromere autoantigen B	P27790	-0.684667	-0.430941	-1.16773	-0.761113	0.2161	0.0360074
Ppp6r3	Serine/threonine-protein phosphatase 6 regulatory subunit 3	Q922D4	-0.204175	-0.27821	-0.0913726	-0.191253	0.0543209	0.0360301
Arsb	Arylsulfatase B	P50429		0.553702	0.695923	0.624812	0.0711106	0.036072
Psma6	Proteasome subunit alpha type-6	Q9QUM9	0.058169	0.142465	0.0732195	0.0912845	0.0259564	0.0361027
Eif3g	Eukaryotic translation initiation factor 3 subunit G	Q3THA0	-0.0268253	-0.0812896	-0.0781753	-0.0620967	0.0176586	0.0361085
Arhgef10l	Rho guanine nucleotide exchange factor 10-like protein	A2AWP6	0.557796		0.701567	0.629681	0.0718857	0.0361822
Hmgcr	3-hydroxy-3-methylglutaryl-coenzyme A reductase	Q01237	-2.32133	-0.745632	-2.02604	-1.69767	0.483591	0.0362183
Tsc1	Hamartin	Q9EP53	0.509851	0.779215	0.267383	0.518817	0.147821	0.0362329
Ascc3	Activating signal cointegrator 1 complex subunit 3	E9PZJ8	-0.0934833	-0.206518	-0.094653	-0.131551	0.0374847	0.0362383
Rtf1	RNA polymerase-associated protein RTF1 homolog	A2AQ19	-0.130148	-0.0650319	-0.0542472	-0.0831425	0.0237083	0.0362857
Jmjd1c	Probable JmjC domain-containing histone demethylation protein 2C	Q69ZK6	-0.275235	-0.2295	-0.550758	-0.351831	0.100336	0.0362925
Vrk3	Putative uncharacterized protein	Q3TAR6	0.211895	0.304565	0.552299	0.356253	0.101608	0.0362996
BC018507	Protein BC018507	E9Q286	-2.41399	-1.35247	-0.914612	-1.56036	0.445138	0.0363147
Slmap	Sarcolemmal membrane-associated protein	Q3URD3	0.340597	0.109456	0.266298	0.238783	0.0681281	0.0363224
Kars	Lysine--tRNA ligase	Q3TIV6	-0.0175687	-0.0415201	-0.0203659	-0.0264849	0.00756085	0.0363598
Iffo2	Intermediate filament family orphan 2	Q8R2V2	-0.408912	-0.598767	-1.07605	-0.694576	0.198455	0.0364151
Ppp1r7	Protein phosphatase 1 regulatory subunit 7	Q3UM45	0.117508	0.250514	0.355785	0.241269	0.0689399	0.0364192
Myo18a	Unconventional myosin-XVIIIa	Q9JMH9	-0.206642	-0.154777	-0.0667118	-0.14271	0.0408425	0.0365225
Rpl18a	60S ribosomal protein L18a	P62717	-0.140849	-0.284326	-0.420374	-0.281849	0.0807013	0.0365534
Arhgdib	Rho GDP-dissociation inhibitor 2	Q61599	1.14088	0.370912	0.829081	0.780289	0.223604	0.0366078
Tpgs1	Tubulin polyglutamylase complex subunit 1	Q99MS8	0.426324	0.14427	0.281337	0.283977	0.0814325	0.0366515
Fyttd1	UAP56-interacting factor	Q91Z49		-0.889633	-0.70508	-0.797357	0.0922765	0.0366742
Polr3c	DNA-directed RNA polymerase III subunit RPC3	Q9D483	-0.326673	-0.142705	-0.442175	-0.303851	0.0871994	0.0367024
Ormdl1	ORM1-like protein 1	Q921I0	-1.39791	-1.00244	-0.45434	-0.951564	0.273571	0.0368203
Stk24	Mammalian sterile twenty 3 kinase	Q3U335	-0.299634	-0.585942	-0.236445	-0.374007	0.107526	0.0368206
Nomo1	Nodal modulator 1	Q6GQT9	0.0711881	0.1365	0.209708	0.139132	0.0400089	0.036835
Cdc40	Pre-mRNA-processing factor 17	Q9DC48	-0.130294	-0.403656	-0.383766	-0.305906	0.0879932	0.0368549
Reep3	Receptor expression-enhancing protein 3	Q99KK1	0.185774	0.421655	0.576277	0.394569	0.113539	0.0368794
Parn	Putative uncharacterized protein	Q3TUQ8	0.325588	0.228389	0.106475	0.220151	0.0633862	0.0369176
Hnrnpk	Heterogeneous nuclear ribonucleoprotein K	P61979	-0.273516	-0.577459	-0.248869	-0.366615	0.105662	0.0369834
Mid1ip1	Mid1 interacting protein 1 (Gastrulation specific G12-like (Zebrafish)), isoform CRA_b	Q4FK31		-1.34534	-1.70096	-1.52315	0.177809	0.0369913
Mcm10	Protein MCM10 homolog	Q0VBD2	-0.0917879	-0.2887	-0.263854	-0.214781	0.0619132	0.0369954
Ston1	Putative uncharacterized protein	Q3UW71	0.363558	0.95916	0.525739	0.616153	0.177779	0.037057
Uros	Uroporphyrinogen-III synthase	P51163	0.612356	1.86323	1.28152	1.25237	0.361391	0.0370649
Nfs1	Cysteine desulfurase, mitochondrial	Q8C6I5	0.310338	0.202905	0.104526	0.205923	0.0594318	0.0370754
Prr14	Proline-rich protein 14	Q7TPN9	-6.56432	-5.18899		-5.87666	0.687662	0.0370787
Hoxd13	Homeobox protein Hox-D13	P70217	-0.676726	-0.856162		-0.766444	0.089718	0.0370918
Fam126a	Hyccin	Q3TTP7		-0.233585	-0.295526	-0.264555	0.0309709	0.0370949
Eif2ak4	Eukaryotic translation initiation factor 2-alpha kinase 4	Q9QZ05	0.139689	0.164374	0.0515771	0.118547	0.0342347	0.0371154
Rin1	Ras and Rab interactor 1	Q921Q7	0.557605	0.29099	0.219651	0.356082	0.102845	0.0371238
Heatr2	HEAT repeat containing 2	B9EJR8	-0.399813	-0.126912	-0.369444	-0.298723	0.0863517	0.0371804
Srrt	Serrate RNA effector molecule homolog	Q99MR6	0.0257728	0.0683811	0.0375625	0.0439055	0.0127022	0.0372352
Trip11	Thyroid hormone receptor interactor 11	B2RY51	0.207139	0.262331		0.234735	0.0275958	0.0372501
Lats1	Serine/threonine-protein kinase LATS1	Q8BYR2	-0.416831	-0.447172	-0.959431	-0.607811	0.176028	0.0373042
Yy1	Transcriptional repressor protein YY1	Q00899	-1.01373	-0.561603	-0.378803	-0.65138	0.188705	0.0373251
Uhrf1bp1l	UHRF1-binding protein 1-like	A2RSJ4	-0.452059	-0.417378	-0.142883	-0.33744	0.0977924	0.0373495
Ik	Putative uncharacterized protein	Q8C2T9	-0.199106	-0.584418	-0.370025	-0.384516	0.111466	0.0373676
Mmtag2	Multiple myeloma tumor-associated protein 2 homolog	Q99LX5	-0.42947	-0.338724		-0.384097	0.0453728	0.037428
Pbxip1	Pre-B-cell leukemia transcription factor-interacting protein 1	Q3TVI8	1.60616	0.583056	1.87917	1.35613	0.394489	0.0375991
Cks1b	Cyclin-dependent kinases regulatory subunit 1	P61025	-0.0868333	-0.274669	-0.20233	-0.187944	0.0546986	0.0376322
Ubac2	Ubiquitin-associated domain-containing protein 2	Q8R1K1	-0.122641	-0.2101	-0.350281	-0.227674	0.0662988	0.0376698
Mrpl22	39S ribosomal protein L22, mitochondrial	Q8BU88	-0.579348	-0.210227	-0.679266	-0.489614	0.14264	0.0377001
Mastl	Serine/threonine-protein kinase greatwall	Q8C0P0	0.255248	0.523964	0.780167	0.519793	0.151545	0.0377502
Mterfd1	mTERF domain-containing protein 1, mitochondrial	Q8R3J4	-0.574875	-1.52041	-1.86328	-1.31952	0.385254	0.0378461
Ppp1r9b	Neurabin-2	Q6R891	-0.24589	-0.690945	-0.402163	-0.446333	0.130361	0.0378704
Twf2	Twinfilin-2	Q9Z0P5	0.375748	0.331155	0.116114	0.274339	0.0801531	0.0378928
Ndufs7	NADH dehydrogenase [ubiquinone] iron-sulfur protein 7, mitochondrial	Q9DC70	0.208134	0.091401	0.288979	0.196171	0.0573487	0.0379325
Mt2	Metallothionein-2	P02798	1.06083		0.833767	0.9473	0.113533	0.037968
Erbb2ip	Protein LAP2	Q80TH2	-0.407396	-0.162686	-0.526154	-0.365412	0.107003	0.0380455
Acsl3	Long-chain-fatty-acid--CoA ligase 3	Q9CZW4	-0.365673	-0.465715		-0.415694	0.0500213	0.0381196
Anxa11	Annexin A11	P97384	1.05211	0.340229	0.709601	0.700648	0.205552	0.0381714
Sh3bgrl2	SH3 domain-binding glutamic acid-rich-like protein 2	Q8BG73	1.45242	0.771535	0.550495	0.924816	0.271409	0.0381942
Eml2	Echinoderm microtubule-associated protein-like 2	Q7TNG5	0.59263	0.223715	0.731081	0.515809	0.151417	0.0382126
Tram1	Putative uncharacterized protein	Q3UAT2	0.177731	0.142387	0.356337	0.225485	0.0662167	0.0382382
Tmx2	Thioredoxin-related transmembrane protein 2	Q9D710	1.08185	0.369825	0.656672	0.702782	0.206833	0.0383869
Irf2bp2	Interferon regulatory factor 2-binding protein 2	E9Q1P8	-0.527579	-1.3855	-0.727752	-0.880278	0.259138	0.0384045
Ctcf	Putative uncharacterized protein (Fragment)	Q3USR8	-0.737226	-0.350801	-0.306039	-0.464689	0.13688	0.0384465
	UPF0488 protein C8orf33 homolog	Q3U6N9	-0.030461	-0.0444026	-0.0820529	-0.0523055	0.0154086	0.0384523
Zadh2	Zinc binding alcohol dehydrogenase, domain containing 2	Q14AZ9		0.845372	1.07914	0.962258	0.116885	0.0384766
Lman1	Putative uncharacterized protein	Q3U944	0.506582	0.155921	0.470786	0.377763	0.111401	0.0385241
Akap1	A-kinase anchor protein 1, mitochondrial	O08715	-0.323487	-0.133742	-0.154288	-0.203839	0.0601174	0.0385306
Arid2	Protein Arid2	E9Q7E2	-0.624888	-0.315845	-0.964732	-0.635155	0.187388	0.0385541
Brap	BRCA1-associated protein	Q99MP8	0.221018	0.0670094	0.182188	0.156738	0.0462436	0.0385564
Tfb2m	Dimethyladenosine transferase 2, mitochondrial	Q3TL26		-0.785095	-1.00273	-0.893912	0.108818	0.0385588
Cyth3	Cytohesin-3	O08967	-0.319891	-0.33505	-0.738406	-0.464449	0.137048	0.0385658
Fcf1	rRNA-processing protein FCF1 homolog	Q9CTH6	-0.516045		-0.403937	-0.459991	0.0560541	0.0385986
Polk	Polymerase kappa isoform 9	Q5Q9H0	0.424828	0.133678	0.297793	0.285433	0.0842746	0.0386062
Siva1	Apoptosis regulatory protein Siva	O54926	0.20092		0.15724	0.17908	0.0218398	0.0386289
Morf4l2	Putative uncharacterized protein	Q3TME1	-2.27531	-0.702303	-1.67855	-1.55206	0.458473	0.0386399
Crabp2	Cellular retinoic acid-binding protein 2	P22935	0.468336	0.151444	0.488738	0.369506	0.10919	0.0386644
Kiaa1524	Protein CIP2A	Q8BWY9	-0.180278	-0.0560854	-0.128861	-0.121742	0.0360277	0.038765
Cdc42bpg	Serine/threonine-protein kinase MRCK gamma	Q80UW5	0.937533	0.402239	1.29945	0.87974	0.260609	0.0388343
P4ha1	Putative uncharacterized protein	Q3UF16	0.403026	0.136904	0.452506	0.330812	0.0980007	0.0388364
Tcea1	Transcription elongation factor A protein 1	P10711	-0.20871	-0.352764	-0.121421	-0.227632	0.0674499	0.0388523
Aspa	Putative uncharacterized protein (Fragment)	Q8BZC2	-0.239665	-0.111474	-0.100643	-0.150594	0.0446453	0.0388871
Kiaa2013	Uncharacterized protein KIAA2013	Q91X21	0.278345	0.504107	0.826443	0.536298	0.159039	0.0389076
Ubqln2	Ubiquilin-2	Q9QZM0	-0.0537107	-0.0303906	-0.0894212	-0.0578408	0.0171653	0.0389586
Pafah1b3	Platelet-activating factor acetylhydrolase, isoform 1b, alpha1 subunit, isoform CRA_a	Q3TJC2	0.484539	0.242908	0.18961	0.305686	0.0907405	0.0389758
Ndufc2	NADH dehydrogenase [ubiquinone] 1 subunit C2	Q9CQ54	0.143037	0.458805	0.32184	0.307894	0.0914206	0.0389944
Tmem2	Transmembrane protein 2	Q5FWI3	0.551826	0.486608	0.165813	0.401416	0.119296	0.0390564
	UPF0183 protein C16orf70 homolog	Q922R1	0.260126	0.719606	0.395214	0.458315	0.136341	0.0391251
Pcca	Propionyl-Coenzyme A carboxylase, alpha polypeptide, isoform CRA_b	Q3UGC8	0.101102	0.229776	0.32617	0.219016	0.0651941	0.0391681
Dhcr24	Delta(24)-sterol reductase	Q8VCH6	-0.358028	-0.877994	-1.17969	-0.805238	0.239967	0.0392472
	UPF0585 protein C16orf13 homolog	Q9DCS2	0.577651	0.186348	0.615937	0.459979	0.137261	0.0393405
Tm9sf1	Transmembrane 9 superfamily member 1	Q9DBU0	0.795462	0.259203	0.503244	0.519303	0.155013	0.0393624
Wdyhv1	Protein N-terminal glutamine amidohydrolase	Q80WB5	0.303844	0.957135	0.63378	0.631586	0.188592	0.0393855
Mad2l1	Putative uncharacterized protein	Q3TV93	-0.123672	-0.0399439	-0.132566	-0.0987271	0.0295035	0.0394413
Pgp	Phosphoglycolate phosphatase	Q8CHP8	0.235589	0.106717	0.342803	0.22837	0.0682476	0.0394431
Mrpl1	39S ribosomal protein L1, mitochondrial	Q99N96	-0.539235	-1.16861	-0.488136	-0.731992	0.218805	0.0394594
Idh3g	Isocitrate dehydrogenase [NAD] subunit gamma 1, mitochondrial	P70404	0.884053	0.413163	0.364613	0.553943	0.165649	0.0394873
Thoc1	THO complex subunit 1	Q8R3N6	-0.314293	-0.126535	-0.150442	-0.19709	0.0590064	0.0395695
P4hb	Protein disulfide-isomerase	P09103	0.0824779	0.129692	0.233189	0.148453	0.0445062	0.0396661
Git1	ARF GTPase-activating protein GIT1	Q5F258		0.252463	0.324834	0.288649	0.0361858	0.0396972
Slc7a2	Low affinity cationic amino acid transporter 2	P18581	-0.815374		-0.633555	-0.724465	0.0909093	0.0397354
Plekho2	Pleckstrin homology domain-containing family O member 2	Q8K124	0.228571	0.145917	0.413039	0.262509	0.0789566	0.0398946
Kdm4b	Lysine-specific demethylase 4B	Q91VY5	-0.230864	-0.538692	-0.239321	-0.336292	0.10123	0.0399509
Thrap3	Thyroid hormone receptor-associated protein 3	Q569Z6	-0.400354		-0.31062	-0.355487	0.0448667	0.0399632
Ints2	Integrator complex subunit 2	Q148R8	-0.222456	-0.212083	-0.066546	-0.167028	0.0503303	0.0400239
Alb	Serum albumin	P07724	-8.2996	-9.24551	-2.72011	-6.75507	2.03588	0.0400372
Atpaf2	ATP synthase mitochondrial F1 complex assembly factor 2	Q91YY4	0.0546344	0.129454	0.180996	0.121695	0.0366831	0.040049
Sipa1l3	MCG122846	G3X9J0	-1.10106	-0.3767	-0.631293	-0.703017	0.212157	0.0401301
Arl6ip6	ADP-ribosylation factor-like protein 6-interacting protein 6	Q8BH07		0.660719	0.852628	0.756674	0.0959544	0.0401508
	Uncharacterized protein C1orf131 homolog	Q8CIL4	-0.558847	-0.468425	-0.16295	-0.396741	0.119774	0.040157
Serbp1	Putative uncharacterized protein	Q3UMP4	-0.501029	-0.447577	-1.08836	-0.678989	0.205267	0.040255
Creld1	Cysteine-rich with EGF-like domain protein 1	Q91XD7	1.80912		1.40092	1.60502	0.2041	0.0402615
Palm	Putative uncharacterized protein	Q3TRX4	0.236896	0.233558	0.541421	0.337291	0.102069	0.0403259
Pdia6	Putative uncharacterized protein	Q3THH1	0.0546585	0.184425	0.175187	0.13809	0.041801	0.040348
Pabpc1	Polyadenylate-binding protein 1	P29341	-0.516339		-0.399583	-0.457961	0.0583784	0.0403588
Isg20l2	Interferon-stimulated 20 kDa exonuclease-like 2	Q3U1G5	-1.45883	-0.504496	-0.818324	-0.927218	0.280823	0.0403852
Kctd12	MKIAA1778 protein (Fragment)	Q69ZA6	-0.545049	-0.948104	-1.62367	-1.03894	0.314667	0.0403867
Scly	Selenocysteine lyase	Q9JLI6	0.412998	0.12446	0.412927	0.316795	0.0961675	0.0405494
Tspyl1	Testis-specific Y-encoded-like protein 1	O88852	-0.785838	-0.230505	-0.59103	-0.535791	0.162673	0.0405609
Ddx51	ATP-dependent RNA helicase DDX51	Q6P9R1	-0.769433	-0.352185	-0.315887	-0.479168	0.14551	0.040575
Stx16	Stx16 protein (Fragment)	Q0VGN4	0.139743	0.46519	0.463138	0.356024	0.108142	0.0405931
Unc119b	Protein unc-119 homolog B	Q8C4B4	0.31592	0.107079	0.180865	0.201288	0.0611457	0.0405985
Pla2g6	85/88 kDa calcium-independent phospholipase A2	P97819		0.277745	0.35971	0.318727	0.0409824	0.0407054
Itga5	Integrin alpha-5	P11688	0.547679		0.422715	0.485197	0.0624818	0.0407664
Synj1	Synaptojanin-1	D3Z656	0.691376	1.06729	0.332153	0.696939	0.212233	0.0407752
Lrch2	Leucine-rich repeat and calponin homology domain-containing protein 2	Q3UMG5	0.316899		0.410676	0.363788	0.0468885	0.0408019
Trmu	Mitochondrial tRNA-specific 2-thiouridylase 1	Q9DAT5	0.257345	0.685916	0.344347	0.429203	0.130791	0.0408242
Gripap1	Putative uncharacterized protein (Fragment)	Q3TZ55	0.407957	0.130004	0.253213	0.263725	0.0804099	0.0408647
Pitpna	Phosphatidylinositol transfer protein alpha isoform	P53810	0.298098	0.229886		0.263992	0.0341061	0.0408971
Prkar2a	Protein kinase, cAMP dependent regulatory, type II alpha	Q8K1M3	0.64112	0.274834	0.278248	0.398067	0.12153	0.0409593
Slc25a3	Putative uncharacterized protein	Q3THU8	0.170475	0.050181	0.122941	0.114532	0.0349794	0.0409853
Nceh1	Neutral cholesterol ester hydrolase 1	Q8BLF1	0.469328	0.156941	0.550953	0.392407	0.120068	0.0411193
Slit2	MKIAA4141 protein (Fragment)	Q5DTL5	-1.36976	-0.576506	-0.603334	-0.849868	0.260063	0.0411254
Lama5	Laminin subunit alpha-5	Q61001	-0.53036	-0.372478	-0.157073	-0.353304	0.108184	0.0411735
Nipbl	Nipped-B-like protein	Q6KCD5	-0.133649	-0.269395	-0.426921	-0.276655	0.0847381	0.0411943
Sepn1	Protein Sepn1	D3Z2R5		-2.27647	-1.75109	-2.01378	0.262694	0.0412899
Cndp2	Cytosolic non-specific dipeptidase	Q9D1A2	0.63971	0.215038	0.758269	0.537672	0.164908	0.0412918
Nop58	Nucleolar protein 58	Q6DFW4	-0.199593	-0.455472	-0.19143	-0.282165	0.0866854	0.0414122
Asah1	Putative uncharacterized protein	Q3TWT5	0.366267	0.783696	0.309495	0.486486	0.149506	0.0414366
Sp1	Transcription factor Sp1	O89090	-0.648754	-1.07867	-0.346432	-0.691287	0.212447	0.0414374
Tmem192	Transmembrane protein 192	Q9CXT7	0.371158	0.977855	0.47662	0.608545	0.187148	0.0414878
Cox17	Cytochrome c oxidase copper chaperone	P56394	0.23585	0.823921	0.62319	0.560987	0.172587	0.041515
Ndufs2	NADH dehydrogenase [ubiquinone] iron-sulfur protein 2, mitochondrial	Q91WD5	0.101455	0.341715	0.234052	0.225741	0.0694817	0.0415495
Efr3a	Protein EFR3 homolog A	Q8BG67	0.413899		0.538997	0.476448	0.062549	0.0415507
Smim14	Small integral membrane protein 14	Q91VT8		-0.493811	-0.37912	-0.436465	0.0573454	0.0415833
Vps26a	Vacuolar protein sorting-associated protein 26A	P40336	0.207369		0.159121	0.183245	0.0241236	0.0416649
Mfn2	Putative uncharacterized protein	Q3TEX7	-0.81156	-0.347055	-0.347336	-0.501984	0.154788	0.0416822
Mrps34	28S ribosomal protein S34, mitochondrial	Q9JIK9	-0.373414	-0.336066	-0.828063	-0.512514	0.158142	0.0417317
Tmprss13	Transmembrane protease serine 13	Q5U405	-13.4787		-10.3377	-11.9082	1.57051	0.0417394
Tmed10	Transmembrane emp24 domain-containing protein 10	Q9D1D4	0.341927		0.262113	0.30202	0.0399071	0.0418173
Nbr1	Next to BRCA1 gene 1 protein	A2A4N8	1.00296	0.398468	0.461346	0.620925	0.191878	0.0418407
Set	SET translocation	Q3T9S3	-0.202391	-0.0569588	-0.158908	-0.139419	0.0430987	0.0418669
Fam63a	Protein FAM63A	Q76LS9	1.16093	0.547027	0.450529	0.719495	0.222467	0.0418833
Ctsz	Cathepsin Z, isoform CRA_b	Q545I6	0.383785	1.139	0.630578	0.717787	0.222329	0.0420125
Gss	Glutathione synthetase	P51855	0.456094	0.14226	0.280698	0.293017	0.0908052	0.0420494
Clint1	Clathrin interactor 1	Q5SUH6	0.0754139	0.0978227	0.200947	0.124728	0.0386547	0.042053
Zxdc	Zinc finger protein ZXDC	Q8C8V1	0.146057	0.498737	0.507853	0.384216	0.119108	0.0420748
Dlst	Dihydrolipoyllysine-residue succinyltransferase component of 2-oxoglutarate dehydrogenase complex, mitochondrial	Q9D2G2	0.639059	0.378473	0.204265	0.407266	0.126337	0.0421235
Vps8	Vacuolar protein sorting-associated protein 8 homolog	Q0P5W1		0.082355	0.0629662	0.0726606	0.0096944	0.0422196
Dnajc10	DnaJ homolog subfamily C member 10	Q9DC23	0.511279	0.163449	0.301735	0.325488	0.10111	0.0422267
Sf3a1	Putative uncharacterized protein	Q3TVM1	-0.146247	-0.0438928	-0.0950175	-0.0950525	0.0295471	0.0422766
Plaa	Phospholipase A-2-activating protein	P27612	-0.141191	-0.0395377	-0.107405	-0.0960444	0.0298894	0.0423607
Tbk1	Serine/threonine-protein kinase TBK1	Q9WUN2	0.227936	0.343251	0.101571	0.224253	0.0697915	0.0423643
Relb	Transcription factor RelB	Q04863	0.273253	0.0892375	0.323219	0.22857	0.0711437	0.0423733
Tomm40l	Mitochondrial import receptor subunit TOM40B	Q9CZR3	0.490246	0.166835	0.265339	0.307473	0.095708	0.0423772
Slc29a1	Solute carrier family 29 (Nucleoside transporters), member 1, isoform CRA_a	Q3TCZ2	-0.249544	-0.705543	-0.364398	-0.439828	0.136932	0.0423909
Nfix	Nuclear factor 1	Q3TYK3	-0.240979	-0.676816	-0.866564	-0.594786	0.18519	0.042397
Rps28	40S ribosomal protein S28	P62858	-0.21987	-0.0695543	-0.251659	-0.180361	0.0561582	0.0423994
Rpap1	RNA polymerase II-associated protein 1	Q80TE0	0.402544	0.124439	0.247691	0.258225	0.0804545	0.0424478
Akap11	Protein Akap11	E9Q774	-0.343969	-0.933829	-0.45829	-0.578696	0.180607	0.0425733
Herc4	Probable E3 ubiquitin-protein ligase HERC4	Q6PAV2	-0.400345	-0.143014	-0.203316	-0.248892	0.0777017	0.0425965
Rpl18	60S ribosomal protein L18	P35980	-0.420145	-0.128543	-0.465639	-0.338109	0.105603	0.0426305
Azi2	5-azacytidine-induced protein 2	Q9QYP6		0.694249	0.911121	0.802685	0.108436	0.0427421
Znfx1	NFX1-type zinc finger-containing protein 1	Q8R151	0.627107	0.364764	1.11462	0.702163	0.219693	0.0427615
Trmt6	tRNA (adenine(58)-N(1))-methyltransferase non-catalytic subunit TRM6	Q8CE96	-0.202644	-0.267629	-0.549111	-0.339795	0.106326	0.0427693
Ccnf	Cyclin-F	P51944	-0.520814		-0.683708	-0.602261	0.081447	0.0427871
Dpf2	Putative uncharacterized protein	Q3UKV4	-0.380896	-0.106506	-0.365806	-0.284403	0.089055	0.0428212
Rint1	RAD50-interacting protein 1	Q8BZ36	0.134063	0.40648	0.225979	0.255507	0.0800142	0.0428279
Speg	Striated muscle-specific serine/threonine-protein kinase	Q62407	1.03795	0.38315	0.504699	0.641934	0.201094	0.042853
Coq9	Ubiquinone biosynthesis protein COQ9, mitochondrial	Q8K1Z0	0.292357	0.440879	0.844226	0.525821	0.164875	0.0429235
Ccnb1	G2/mitotic-specific cyclin-B1	P24860	0.19868	0.72303	0.665942	0.529217	0.166088	0.0429907
Blm	Bloom syndrome protein homolog	O88700	-0.529719	-0.460871	-0.143934	-0.378175	0.118795	0.04306
Cc2d1b	Cc2d1b protein (Fragment)	Q7TPN1	0.363626	0.111385	0.221837	0.232283	0.0730027	0.0430976
Eif4h	Putative uncharacterized protein	Q3V244	-0.496613	-0.212046	-0.736543	-0.481734	0.151592	0.0431926
Llgl1	Lethal(2) giant larvae protein homolog 1	Q80Y17	-0.434508	-0.139252	-0.247911	-0.273891	0.0862172	0.0432183
Ccdc22	Coiled-coil domain-containing protein 22	Q9JIG7	0.0358333	0.12154	0.0783608	0.0785782	0.0247417	0.0432378
Syap1	Synapse-associated protein 1	Q9D5V6	0.302153	0.108368	0.396195	0.268905	0.0847351	0.0432963
Bcap31	Putative uncharacterized protein	Q3U9U5	0.321552	0.0960622	0.353645	0.257086	0.0810433	0.0433266
Crnkl1	Crooked neck-like protein 1	P63154	-0.0536318	-0.153056	-0.197157	-0.134615	0.0424459	0.0433445
Ndufs8	Putative uncharacterized protein	Q3UY05	0.130428	0.409649	0.484444	0.341507	0.107726	0.0433755
Rab18	Ras-related protein Rab-18	P35293	0.0344576	0.118385	0.0775544	0.0767988	0.0242306	0.0433912
Clcc1	Chloride channel CLIC-like protein 1	Q99LI2	0.723847	0.243224	0.386733	0.451268	0.142447	0.0434276
Itga6	Integrin alpha-6	Q61739	-0.500122	-0.140665	-0.504198	-0.381662	0.120504	0.0434463
Tfdp1	Transcription factor Dp-1	Q08639	-1.68496	-0.652593	-0.766653	-1.03473	0.326775	0.043463
Exoc8	Exocyst complex component 8	Q6PGF7	-0.173646	-0.0713373	-0.0742864	-0.106423	0.0336221	0.0434925
Phip	PH-interacting protein	Q8VDD9	-0.195208	-0.257884	-0.0702501	-0.174447	0.0551508	0.0435449
Glod4	Glyoxalase domain-containing protein 4	Q9CPV4	0.0930736	0.18628	0.30652	0.195291	0.0617813	0.043595
Slc12a7	Solute carrier family 12 member 7	Q9WVL3	0.270086	0.204503		0.237295	0.0327915	0.0437101
Smyd2	N-lysine methyltransferase SMYD2	Q8R5A0	0.241229	0.0651605	0.184485	0.163625	0.0518857	0.0437749
Rps11	40S ribosomal protein S11	P62281	-0.244715	-0.101085	-0.358331	-0.23471	0.0744288	0.0437767
Bud31	Protein BUD31 homolog	Q6PGH1	-1.02418	-0.875429	-0.272735	-0.724115	0.229738	0.0438149
Rbx1	E3 ubiquitin-protein ligase RBX1	P62878	-0.560178	-0.430601	-1.17388	-0.721553	0.229236	0.0439186
Aip	AH receptor-interacting protein	O08915	-0.0823111	-0.226739	-0.109284	-0.139445	0.0443363	0.0439791
Glce	D-glucuronyl C5-epimerase	Q9EPS3	-0.110772	-0.0312445	-0.0748312	-0.0722826	0.022993	0.0440152
Nadkd1	NAD kinase domain-containing protein 1, mitochondrial	Q8C5H8	-0.0912002	-0.344742	-0.287638	-0.241193	0.0767869	0.0440789
Racgap1	Rac GTPase-activating protein 1	Q9WVM1	-0.310481	-0.0920831	-0.192096	-0.19822	0.0631203	0.0440967
Rpl21	60S ribosomal protein L21	O09167	-0.23021	-0.131252	-0.411514	-0.257659	0.0820605	0.0441086
Gclc	Glutamate--cysteine ligase catalytic subunit	P97494	0.588525	0.219487	0.274256	0.360756	0.114977	0.044163
Man2b1	Lysosomal alpha-mannosidase	O09159	1.43454	0.7975	0.458426	0.896822	0.286122	0.0442426
Epm2aip1	EPM2A-interacting protein 1	Q8VEH5	-0.449125	-0.160886	-0.218159	-0.276057	0.0880996	0.0442657
Magi3	Membrane-associated guanylate kinase, WW and PDZ domain-containing protein 3	Q9EQJ9	-0.162773	-0.294138	-0.0942189	-0.18371	0.0586535	0.0442987
Zfp407	MCG1556, isoform CRA_b	G3UVV3	-2.15639	-2.0127	-0.574558	-1.58122	0.505035	0.0443288
Wdfy3	WD repeat and FYVE domain-containing protein 3	Q6VNB8	-0.246958	-0.361069	-0.100424	-0.23615	0.0754358	0.0443391
Ptgs1	Prostaglandin G/H synthase 1	P22437	1.67865	0.473486	1.11474	1.08896	0.348139	0.0444019
Plcd3	1-phosphatidylinositol 4,5-bisphosphate phosphodiesterase delta-3	Q8K2J0	0.895339	0.415403	0.333104	0.547949	0.175313	0.044461
Cenpj	Centromere protein J	Q569L8	0.637908	0.846919		0.742414	0.104506	0.0445143
Pfdn1	Putative uncharacterized protein (Fragment)	Q8CEH4	0.121156	0.101511	0.0316795	0.0847821	0.0271501	0.0445314
Gemin5	Gem-associated protein 5	E9PUU4	-0.126281	-0.0446139	-0.167603	-0.112833	0.0361351	0.044536
Tbc1d9b	TBC1 domain family member 9B	Q5SVR0	1.55649	0.606907	0.684354	0.949249	0.304441	0.0446484
Ptx3	Pentraxin-related protein PTX3	P48759		-0.211678	-0.159246	-0.185462	0.0262157	0.0446981
Cpsf1	Cleavage and polyadenylation specificity factor subunit 1	Q9EPU4	-0.162799	-0.0479972	-0.185241	-0.132012	0.0425042	0.0449524
Mrps25	MFLJ00023 protein (Fragment)	Q6KAU3		-0.165982	-0.221088	-0.193535	0.0275528	0.045014
Rest	RE1-silencing transcription factor	Q8VIG1	-0.562286		-0.422075	-0.492181	0.0701059	0.0450369
Slc4a1ap	Protein Slc4a1ap	E9PX68	0.085614	0.318874	0.22663	0.210373	0.0678252	0.0450577
Foxp4	Forkhead box protein P4	Q9DBY0	-0.454848	-0.255854	-0.816661	-0.509121	0.164149	0.0450607
Emc2	MKIAA0103 protein (Fragment)	Q6A0D1	0.235393	0.0606768	0.203263	0.166444	0.0536908	0.0450992
Pald1	Paladin	P70261	0.36121	0.434311	0.111946	0.302489	0.0975805	0.0451031
St13	Putative uncharacterized protein	Q3U3N7	0.0384823	0.148869	0.119136	0.102162	0.0329766	0.0451504
Apool	Apolipoprotein O-like	Q78IK4	0.456619	0.143069	0.555719	0.385136	0.124368	0.0451831
Eri3	ERI1 exoribonuclease 3	Q8C460		-0.208427	-0.277957	-0.243192	0.0347646	0.0451966
Cyfip1	Cytoplasmic FMR1-interacting protein 1	Q7TMB8	0.190637	0.0520124	0.129897	0.124182	0.0401192	0.0452188
Cog4	Conserved oligomeric Golgi complex subunit 4	Q8R1U1		0.275217	0.367458	0.321338	0.0461207	0.0453763
Vcpip1	MKIAA1850 protein (Fragment)	Q80T83	0.242657	0.0870963	0.114243	0.147999	0.0479733	0.0454814
Pcbp1	Poly(rC)-binding protein 1	P60335	-0.228933	-0.608812	-0.860546	-0.566097	0.183577	0.0455152
Dcun1d3	DCN1-like protein 3	Q8K0V2	0.83822	0.627021		0.732621	0.1056	0.0455672
Dbnl	Drebrin-like protein	Q62418	0.232327	0.0807412	0.113036	0.142035	0.0460986	0.0455817
Aim1	Protein Aim1	E9PVP1	-0.18894	-0.739674	-0.662694	-0.530436	0.172188	0.0455954
Atp5c1	ATP synthase subunit gamma	Q3UD06	0.12688	0.094831		0.110856	0.0160246	0.0456963
Slk	STE20-like serine/threonine-protein kinase	O54988	0.349194	0.100254	0.214287	0.221245	0.0719469	0.0457359
Mri1	Methylthioribose-1-phosphate isomerase	Q9CQT1	-0.0556841	-0.0717747	-0.154314	-0.0939244	0.0305501	0.0457533
Ctc1	CST complex subunit CTC1	Q5SUQ9	1.14206	0.512097	0.426067	0.693408	0.225697	0.0458085
Qki	Protein quaking	Q9QYS9	-0.665862	-1.53991	-0.594658	-0.933477	0.303914	0.0458285
Tma16	Translation machinery-associated protein 16	Q9CR02	-0.732832	-0.199977	-0.779851	-0.570887	0.185951	0.0458655
Paip1	Polyadenylate-binding protein-interacting protein 1	F6Y616	0.451433	0.234669	0.14686	0.277654	0.0905116	0.04593
P2rx4	P2X purinoceptor	Q3UCX4		0.91032	1.22013	1.06523	0.154906	0.0459666
Imp4	U3 small nucleolar ribonucleoprotein protein IMP4	Q8VHZ7	-0.838612	-0.244582	-0.498936	-0.527377	0.17207	0.0460005
Cox5b	Cytochrome c oxidase subunit 5B, mitochondrial	P19536	0.347779	0.0877738	0.310902	0.248818	0.0812228	0.0460392
Dis3l	DIS3-like exonuclease 1	Q8C0S1	-0.134511	-0.440728	-0.534811	-0.370016	0.120844	0.0460777
Vps37b	Vacuolar protein sorting-associated protein 37B	Q8R0J7	0.712034	0.18181	0.674601	0.522815	0.170845	0.0461233
Lrrc58	Leucine-rich repeat-containing protein 58	Q3UGP9	-0.3669	-1.11271	-0.565478	-0.681694	0.222999	0.046208
Bzw1	Basic leucine zipper and W2 domain-containing protein 1	Q9CQC6	0.521407	0.14352	0.335504	0.333477	0.109091	0.04621
Txlng	Gamma-taxilin	Q8BHN1	-0.0802818	-0.266267	-0.150345	-0.165631	0.0542306	0.0462796
Mtr	Methionine synthase	A6H5Y3	-0.205749	-0.448121	-0.727694	-0.460522	0.1508	0.0462888
Capzb	F-actin-capping protein subunit beta	P47757	0.271539	0.107431	0.113323	0.164098	0.0537476	0.046308
Acsf3	Acyl-CoA synthetase family member 3, mitochondrial	Q3URE1	0.872146	0.261009	0.495992	0.543049	0.177982	0.0463601
Gm17296	Protein Gm17296	E9Q368	0.700618	0.277063	0.291858	0.42318	0.138785	0.0464117
Pola2	DNA polymerase alpha subunit B	P33611	0.0910836	0.0677533		0.0794185	0.0116652	0.0464221
Exosc1	Exosome complex component CSL4	Q9DAA6	-0.128882	-0.386203	-0.192026	-0.235704	0.0774257	0.0465415
Enah	Protein enabled homolog	Q03173	-0.0940485	-0.299459	-0.159077	-0.184195	0.0606122	0.0466834
Dcp1a	mRNA-decapping enzyme 1A	Q91YD3	0.136783	0.0513922	0.0596824	0.0826193	0.0271876	0.0466844
Rnpep	Aminopeptidase B	Q8VCT3	0.528783	0.142005	0.567482	0.412756	0.135836	0.0466904
Ankrd40	Ankyrin repeat domain-containing protein 40	Q5SUE8		-0.691879	-0.513393	-0.602636	0.0892431	0.0467977
Arl6ip1	Putative uncharacterized protein	Q3THR3	0.347649		0.468515	0.408082	0.0604334	0.0467988
Asns	Asparagine synthetase	Q3TIA9	-0.130044	-0.0517073	-0.1948	-0.125517	0.0413692	0.046812
L factor type I (LF1)	Large T antigen	Q04187	-0.590697	-0.438183		-0.51444	0.076257	0.0468429
Arhgap5	Rho GTPase-activating protein 5	P97393	-0.15658	-0.636726	-0.536185	-0.443164	0.146202	0.0468891
Otg1	Uncharacterized protein C10orf118 homolog	Q8C9S4	0.375482	0.121275	0.487269	0.328008	0.108287	0.0469456
Psmb1	Proteasome subunit beta type-1	O09061	0.0723549	0.292776	0.232428	0.199187	0.0657652	0.046954
Ecm1	Extracellular matrix protein 1	Q3TDX7	0.506575	0.38455	1.09175	0.660959	0.218258	0.0469651
Grsf1	G-rich sequence factor 1	Q8C5Q4	-1.75432	-0.764608	-0.655808	-1.05825	0.349453	0.0469663
Wapal	Wings apart-like protein homolog	Q65Z40	-0.36987	-0.138047	-0.534283	-0.3474	0.114934	0.0471189
Aldh9a1	Putative uncharacterized protein	Q3TG52	0.920153	0.262535	0.543974	0.575554	0.190494	0.0471519
Ino80b	Ino80b protein (Fragment)	Q80ZV5	-0.456775		-0.617061	-0.536918	0.0801432	0.0471644
Slc25a4	ADP/ATP translocase 1	P48962	0.155838	0.0424195	0.0982643	0.0988407	0.0327424	0.0472233
Dpm1	Dolichol-phosphate mannosyltransferase	O70152	1.18867	0.400094	0.575193	0.72132	0.239081	0.0472687
Rpl8	60S ribosomal protein L8	P62918	-0.212336	-0.636873	-0.311045	-0.386752	0.128266	0.0473182
Atp1b3	Sodium/potassium-transporting ATPase subunit beta-3	P97370	0.0518131	0.196895	0.130511	0.126406	0.0419317	0.0473359
Ccdc80	Coiled-coil domain-containing protein 80	Q8R2G6		-1.36127	-1.84114	-1.6012	0.239934	0.0473452
Polr1e	Polymerase (RNA) I polypeptide E, isoform CRA_b	Q3V1B9	-0.964509	-0.342303	-0.43997	-0.582261	0.193193	0.0473545
Ehbp1l1	EH domain-binding protein 1-like protein 1	E9QP49	-0.20022	-0.63844	-0.333586	-0.390749	0.129692	0.0473811
Napg	Putative uncharacterized protein	Q8C1T5	0.633668	0.161759	0.650509	0.481979	0.160183	0.0474895
Spen	Msx2-interacting protein	A2ADB0	-0.136161	-0.547206	-0.403367	-0.362245	0.120427	0.047514
Gtf3c5	General transcription factor IIIC, polypeptide 5, isoform CRA_b	Q3UI98	-0.893644	-0.648535	-0.223429	-0.588536	0.195787	0.0475687
Dimt1	Putative uncharacterized protein	Q3UK38	-0.664029		-0.490051	-0.57704	0.0869891	0.0476267
Timp2	Metalloproteinase inhibitor 2	P25785	-0.407111	-0.0982462	-0.357159	-0.287506	0.095722	0.0476359
Spg7	Paraplegin	Q3ULF4	0.559602	0.145242	0.59394	0.432928	0.144184	0.0476616
Zc3hav1	Zinc finger CCCH-type antiviral protein 1	D3Z5I1	-0.34628	-0.145452	-0.132022	-0.207918	0.0692898	0.0477138
Mrpl2	39S ribosomal protein L2, mitochondrial	Q9D773		-0.579885	-0.427527	-0.503706	0.0761787	0.047778
Mrpl3	Mitochondrial ribosomal protein L3	Q91XB2	-0.191326	-0.752328	-0.52017	-0.487941	0.162747	0.0477836
Mnat1	CDK-activating kinase assembly factor MAT1	P51949	-0.0634552	-0.127832	-0.221702	-0.137663	0.0459458	0.0478371
Pla2g4a	Cytosolic phospholipase A2	P47713	0.300845	0.25128	0.0720678	0.208064	0.0694872	0.0478902
Mrpl30	39S ribosomal protein L30, mitochondrial	Q9D7N6	-1.05498	-3.25442	-1.61682	-1.97541	0.659752	0.0478933
Nln	Neurolysin, mitochondrial	Q91YP2	0.0851633	0.228603	0.0977625	0.137176	0.0458577	0.0479711
Ccna2	Cyclin-A2	P51943	-0.51592	-0.196365	-0.215806	-0.309364	0.103431	0.0479798
Sh3pxd2b	SH3 and PX domain-containing protein 2B	A2AAY5	-0.167094	-0.0400581	-0.133745	-0.113632	0.0380259	0.0480556
[truncated: 5,908 more rows]
