# Supplementary material for: Nucleolin perturbation alters membrane lipid homeostasis
Source: Royal Society of Chemistry journal article supplement (doi:10.1039/d5mo00088b), 2025-10-28
Supplement: d5mo00088b7.xlsx [file d5mo00088b7.xlsx]

## Sheet: SILAC cholesterol
Table S4
24 h		48h
Gene	log2FC AS1411/CTR	Gene	log2FC AS1411/CTR
Acat2	ND	Acat2	ND
Cyp51	-0.186087	Cyp51	-0.762827
Dhcr7	-0.212112	Dhcr7	0.485761
Dhcr24	-0.363784	Dhcr24	-0.805
Fdft1	-0.306894	Fdft1	-1.532
Fdps	0.0078371	Fdps	-0.424691
Hmgcr	-1.34817	Hmgcr	-1.698
Hmgcs1	ND	Hmgcs1	-1.115
Idi1	-0.230447	Idi1	-0.62
Lss	-0.342105	Lss	0.0993008
Msmo1	-0.353175	Msmo1	-0.623
Mvd	-0.175499	Mvd	-0.14289
Mvk	ND	Mvk	ND
Nsdhl	-0.0836248	Nsdhl	-0.0432659
Pmvk	0.0694987	Pmvk	-0.105483
Sqle	-0.787341	Sqle	-1.093
ND - not detected in all samples
