# Supplementary material for: Nucleolin perturbation alters membrane lipid homeostasis
Source: Royal Society of Chemistry journal article supplement (doi:10.1039/d5mo00088b), 2025-10-28
Supplement: d5mo00088b8.xlsx [file d5mo00088b8.xlsx]

## Sheet:  Intensities
Table S5
		Normalized intensity													Mean			SEM
Ionisation mode	Class	Name	AS1	AS2	AS3	AS4	CTR1	CTR2	CTR3	CTR4	VEH1	VEH2	VEH3	VEH4	AS1411	Control	Vehicle	AS1411	Control	Vehicle
positive	Ceramides	Cer d18:1/C16:0	0.335444	0.362654	0.342951	0.355882	0.254535	0.227599	0.263391	0.262749	0.331949	0.236318	0.244796	0.26385	0.349233	0.252068	0.269228	0.00615035	0.00840182	0.0216848
positive	Ceramides	Cer d18:1/C18:0	0.0634737	0.0628439	0.0472632	0.051941	0.0327624	0.0263754	0.0340384	0.0353043	0.0409603	0.0260225	0.0298252	0.0338908	0.0563804	0.0321201	0.0326747	0.00403034	0.00198395	0.00319506
negative	Ceramides	Cer d18:1/C18:1	0.0132593	0.0118227	0.00826901	0.00955425	0.00596989	0.0046229	0.00689779	0.00729673	0.00920211	0.00526329	0.00570986	0.00637739	0.0107263	0.00619682	0.00663816	0.00111916	0.000593708	0.000884771
positive	Ceramides	Cer d18:1/C20:0	0.0486152	0.0469122	0.0402062	0.0434176	0.0165608	0.0194134	0.0256981	0.0269276	0.0317547	0.0198756	0.021883	0.0253667	0.0447878	0.02215	0.02472	0.00187152	0.00248565	0.00260484
positive	Ceramides	Cer d18:1/C22:0	0.362148	0.355795	0.348875	0.380986	0.277663	0.238885	0.289976	0.275208	0.310293	0.231147	0.235575	0.292565	0.361951	0.270433	0.267395	0.00689965	0.011001	0.0200004
negative	Ceramides	Cer d18:1/C24:0	0.910822	0.907996	0.889236	0.926834	0.988911	0.871608	1.01586	0.935885	1.26203	0.853325	0.931355	1.00447	0.908722	0.953065	1.0128	0.00770661	0.0318304	0.088624
positive	Ceramides	Cer d18:1/C24:1	0.756041	0.661588	0.626215	0.708041	0.547911	0.463691	0.546819	0.515676	0.591871	0.458518	0.457884	0.536741	0.687971	0.518524	0.511253	0.0282049	0.0197463	0.0326322
negative	Ceramides	Cer d18:1/C26:0	0.0396466	0.0511385	0.0376255	0.0337077	0.0513173	0.0515209	0.0522789	0.0504368	0.059855	0.0416381	0.049158	0.0517748	0.0405295	0.0513885	0.0506065	0.003745	0.000378714	0.00375755
positive	Ceramides	Cer d18:1/C26:1	0.0228812	0.0240996	0.0183189	0.0196451	0.0220322	0.0240919	0.0212129	0.0215577	0.0238313	0.0201574	0.0194555	0.0247481	0.0212362	0.0222237	0.0220481	0.00135237	0.000644987	0.00131551
positive	Diacylglycerols	DAG 36:0 (1)*	0.055756	0.0206111	0.0203508	0.0262737	0.0180453	0.0238784	0.0542751	0.0292678	0.0791702	0.023174	0.0217377	0.0310081	0.0307479	0.0313667	0.0387725	0.00844728	0.00797254	0.0136191
positive	Diacylglycerols	DAG 36:2	0.0107922	0.0133785	0.00899143	0.00820283	0.0116508	0.0153789	0.0120674	0.0125071	0.0207381	0.0132796	0.014769	0.0145263	0.0103412	0.0129011	0.0158282	0.00114831	0.000844256	0.00166883
positive	Diacylglycerols	DAG 36:1	0.00880044	0.0123447	0.00658456	0.00701557	0.0125229	0.0145234	0.0122814	0.0132039	0.0212685	0.0120965	0.0173326	0.015301	0.00868632	0.0131329	0.0164996	0.0013104	0.00050295	0.00192051
positive	Diacylglycerols	DAG 34:1	0.00864535	0.0105795	0.00745361	0.00760679	0.010463	0.0137113	0.0132587	0.0105791	0.025199	0.0112035	0.0156485	0.0119948	0.00857131	0.012003	0.0160115	0.000719827	0.000860921	0.00321186
positive	Diacylglycerols	DAG 36:0 (2)	0	0.00799361	0.00569056	0.00708873	0.00727237	0.0105361	0.0180456	0.00944925	0.0262095	0.00978271	0.00909698	0.00992972	0.00519322	0.0113258	0.0137547	0.00179471	0.00234042	0.00415556
positive	Diacylglycerols	DAG 34:0	0.0074917	0.00684144	0.00404865	0.00432448	0.0059482	0.00691889	0.00842911	0.00720715	0.014914	0.00586994	0.00869795	0.00788095	0.00567657	0.00712584	0.00934072	0.000872253	0.000511109	0.00195047
positive	Diacylglycerols	DAG 32:0	0.0033807	0.00335869	0.00275109	0.00294998	0.00307329	0.0032683	0.00388565	0.00336849	0.00605329	0.00258892	0.00345162	0.00337616	0.00311012	0.00339893	0.0038675	0.000155334	0.000173427	0.000754255
positive	Diacylglycerols	DAG 38:4 (2)	0.00171791	0.00200874	0.00219283	0.00248584	0.00277966	0.00226991	0.00391729	0.00241872	0.00508622	0.00218821	0.00315662	0.00284646	0.00210133	0.00284639	0.00331938	0.000161194	0.00037266	0.00062259
positive	Diacylglycerols	DAG 32:1	0.00246238	0.00336259	0.00171961	0.00194691	0.00212288	0.00290642	0.00248803	0.00259421	0.00417377	0.00269544	0.00291404	0.00269841	0.00237287	0.00252789	0.00312042	0.000364664	0.000161582	0.00035483
positive	Diacylglycerols	DAG 38:2	0.00178673	0.00273387	0.00163993	0.0020269	0.00264967	0.00310387	0.00227427	0.00247104	0.00332903	0.0028063	0.00304619	0.00308846	0.00204686	0.00262471	0.0030675	0.000242494	0.000177164	0.000107051
positive	Diacylglycerols	DAG 38:3 (1)	0.00141616	0.00180329	0.00139975	0.00154951	0.00184455	0.00247455	0.002178	0.00202625	0.00305445	0.00227016	0.002635	0.00244895	0.00154218	0.00213084	0.00260214	9.32734e-05	0.000133309	0.000168162
positive	Diacylglycerols	DAG 38:3 (2)	0.00062288	0.00103918	0.000695635	0.00101499	0.001622	0.00176909	0.00173918	0.00153768	0.00276215	0.00168303	0.00205173	0.0019112	0.000843172	0.00166699	0.00210203	0.00010733	5.35268e-05	0.000232784
positive	Diacylglycerols	DAG 40:6	0.00108629	0.00112567	0.00120158	0.00124416	0.00128345	0.000905759	0.00130937	0.00116561	0.00238719	0.00117334	0.0014832	0.00120072	0.00116442	0.00116605	0.00156111	3.57609e-05	9.22286e-05	0.000284124
positive	Diacylglycerols	DAG 38:6	0.000661429	0.000506679	0.000641112	0.000507583	0.000567096	0.000631279	0.000730698	0.000531218	0.00147332	0.000708502	0.000665437	0.000620185	0.000579201	0.000615073	0.000866862	4.18161e-05	4.37466e-05	0.000202956
positive	Diacylglycerols	DAG 38:5	0.000655704	0.000547766	0.000540916	0.000379599	0.000451385	0.000448475	0.000893508	0.000465298	0.00147715	0.000585209	0.000589302	0.000606224	0.000530996	0.000564666	0.000814471	5.69009e-05	0.000109675	0.00022094
positive	Diacylglycerols	DAG 38:4 (1)	0	0.00078473	0.000415912	0.00035774	0	0.000596063	0.000848244	0.000822424	0.00162497	0.000895927	0.000651028	0	0.000389596	0.000566683	0.000792981	0.00016063	0.000197204	0.000335631
negative	Glycosphingolipids	GSL d18:1/C16:0	2.20809	2.94173	2.29287	2.09859	3.04446	3.73833	3.66876	3.44697	4.65785	4.12859	3.42418	3.58712	2.38532	3.47463	3.94943	0.189685	0.156269	0.280046
negative	Glycosphingolipids	GSL d18:1/C24:1	1.66009	2.05916	1.69812	1.48287	2.55796	2.85291	2.90474	2.71481	3.77423	3.12218	2.50321	2.644	1.72506	2.7576	3.0109	0.120839	0.0776855	0.286855
positive	Glycosphingolipids	GSL d18:1/C24:0	0.662057	1.14574	1.11288	0.883677	1.6433	2.12051	1.82514	1.5403	3.20204	1.89978	2.04045	1.67492	0.951088	1.78231	2.2043	0.112601	0.127182	0.340992
positive	Glycosphingolipids	GSL d18:1/C22:0	0.318696	0.542944	0.520272	0.407507	0.82644	0.988119	0.857576	0.763723	1.27369	0.93358	0.915057	0.8337	0.447355	0.858964	0.989008	0.0521178	0.0472683	0.097343
negative	Glycosphingolipids	GSL d18:1/C18:0	0.0277203	0.0475647	0.0397527	0.0324459	0.0550705	0.0651709	0.0706895	0.0578536	0.0957213	0.067005	0.0581704	0.0640181	0.0368709	0.0621961	0.0712287	0.0043395	0.00354283	0.00836778
negative	Glycosphingolipids	GSL d18:1/C18:1	0.00977637	0.00624483	0	0.00471517	0	0.00319415	0.0048235	0.0130813	0.0218169	0.0136643	0.0127272	0.0118525	0.00518409	0.00527474	0.0150152	0.00202709	0.00278833	0.00229719
negative	Lactosylceramides	LacCer d18:1/C24:1	0.0191436	0.0295864	0.0327637	0.0284695	0.0350345	0.0579231	0.0566206	0.0367261	0.0845911	0.0489883	0.0795736	0.0440032	0.0274908	0.0465761	0.064289	0.00292728	0.00619058	0.0103739
positive	Long chain bases	LCB d18:1 SO	0.646579	0.358328	0.637089	0.657618	0.525915	0.265226	0.807971	0.497668	0.882399	0.306851	0.358275	0.459867	0.574904	0.524195	0.501848	0.0723136	0.111168	0.130773
positive	Lysophosphatidylcholines	lysoPC 16:0 (2)	0.0448502	0.0614213	0.0766734	0.0778855	0.0364048	0.0353222	0.0344295	0.0401783	0.042009	0.0439643	0.0381516	0.0438787	0.0652076	0.0365837	0.0420009	0.0077511	0.00126443	0.00136009
positive	Lysophosphatidylcholines	lysoPC 18:1 (2)	0.0200577	0.0261888	0.0289006	0.0308027	0.0150309	0.0151039	0.0147084	0.0193356	0.0203997	0.0184876	0.0168949	0.0206993	0.0264875	0.0160447	0.0191204	0.00234299	0.00110032	0.000888944
positive	Lysophosphatidylcholines	lysoPC 18:1 (1)	0.0144905	0.0222107	0.0251311	0.0298184	0.0132676	0.0145558	0.0141786	0.0169091	0.0184555	0.0167603	0.0153842	0.0184289	0.0229127	0.0147278	0.0172572	0.00321502	0.00077575	0.00073958
positive	Lysophosphatidylcholines	lysoPC 16:0 (1)	0.00860002	0.0100503	0.0124597	0.0131504	0.00763511	0.00842838	0.0104289	0.00882262	0.012852	0.010615	0.00853505	0.0100094	0.0110651	0.00882875	0.0105029	0.00105671	0.000587757	0.000896595
positive	Lysophosphatidylcholines	lysoPC 20:0	0.00302271	0.00428877	0.00504159	0.00482048	0.00296394	0.0030853	0.0026179	0.00350306	0.00306314	0.00332381	0.00299911	0.003799	0.00429339	0.00304255	0.00329626	0.000452059	0.000182667	0.000181694
positive	Lysophosphatidylcholines	lysoPC 18:0 (1)	0.00262893	0.00427372	0.00434238	0.00434662	0.00274626	0.00322289	0.00251785	0.00306276	0.00292622	0.00339976	0.00326048	0.00340627	0.00389791	0.00288744	0.00324818	0.000423323	0.000158058	0.000112465
positive	Lysophosphatidylcholines	lysoPC 16:1 (1)	0.00232911	0.00328638	0.00333528	0.00364138	0.00200405	0.00206485	0.00204512	0.00263595	0.00297203	0.00263817	0.00224418	0.00266961	0.00314804	0.00218749	0.002631	0.000284052	0.000150021	0.000149296
positive	Lysophosphatidylcholines	lysoPC 20:1	0.00231772	0.00334815	0.003961	0.00398409	0.00194229	0.00204032	0.001878	0.00225223	0.00241474	0.00249023	0.00222343	0.00254077	0.00340274	0.00202821	0.00241729	0.000390499	8.17913e-05	6.96144e-05
positive	Lysophosphatidylcholines	lysoPC 22:6 (1)	0.00152764	0.00178014	0.00231451	0.00257379	0.00146901	0.00125037	0.00199982	0.00176545	0.00312631	0.00181504	0.00160054	0.00165017	0.00204902	0.00162116	0.00204801	0.000239791	0.000164531	0.000362345
positive	Lysophosphatidylcholines	lysoPC 18:2 (1)	0.000777583	0.00114844	0.00136292	0.00170826	0.000734399	0.000713132	0.000843411	0.000938061	0.00118415	0.000883566	0.000803016	0.000894104	0.0012493	0.000807251	0.000941209	0.000194987	5.21095e-05	8.34964e-05
positive	Lysophosphatidylcholines	lysoPC 16:1 (2)	0.000758433	0.00107097	0.00120148	0.00127169	0.000574837	0.000562391	0.000671238	0.000779493	0.000903343	0.000852938	0.000685142	0.000813323	0.00107564	0.00064699	0.000813687	0.00011362	5.04217e-05	4.66394e-05
positive	Lysophosphatidylcholines	lysoPC 22:6 (2)	0.000630484	0.000685262	0.00115729	0.00128571	0.000573148	0.000403543	0.000458933	0.000814729	0.000792911	0.000611416	0.000622395	0.000790927	0.000939687	0.000562588	0.000704412	0.000165182	9.11621e-05	5.05733e-05
positive	Lysophosphatidylcholines	lysoPC 18:2 (2)	0.000612531	0.00078832	0.000852738	0.0011121	0.000487222	0.00046725	0.000446169	0.000677129	0.000667346	0.000626457	0.000518706	0.000643944	0.000841421	0.000519442	0.000614113	0.000103522	5.3226e-05	3.28868e-05
positive	Lysophosphatidylcholines	lysoPC 18:3	4.30603e-05	6.47334e-05	7.29874e-05	8.90138e-05	4.72497e-05	0	4.72983e-05	6.47195e-05	7.95281e-05	5.76885e-05	5.05171e-05	6.31594e-05	6.74487e-05	3.98169e-05	6.27233e-05	9.56511e-06	1.38947e-05	6.17071e-06
positive	Lysophosphatidylethanolamines	lysoPE 18:0	0.174595	0.145622	0.14275	0.171368	0.0798273	0.0690335	0.0800459	0.0936579	0.0587741	0.0823549	0.0655747	0.0941471	0.158584	0.0806411	0.0752127	0.00835923	0.00504306	0.00802411
positive	Lysophosphatidylethanolamines	lysoPE 18:1	0.0852995	0.0728158	0.0675758	0.0866988	0.0593164	0.0435942	0.054815	0.0661279	0.0299588	0.0598365	0.0327686	0.0628429	0.0780975	0.0559634	0.0463517	0.00469445	0.00473352	0.00869399
positive	Lysophosphatidylethanolamines	lysoPE 16:0 (2)	0.0477058	0.0358435	0.0355346	0.0455981	0.0179917	0.0139707	0.017879	0.0210957	0.0111135	0.0181736	0.0128724	0.0210396	0.0411705	0.0177343	0.0157998	0.00319446	0.00145919	0.00230257
positive	Lysophosphatidylethanolamines	lysoPE 16:0 (1)	0.00510385	0.0030261	0.00415857	0.00482642	0.00378532	0.00243636	0.00448728	0.00378976	0.00291837	0.00365337	0.00198239	0.00352363	0.00427873	0.00362468	0.00301944	0.000462268	0.000429071	0.000380983
positive	Lysophosphatidylethanolamines	lysoPE 18:2	0.0055824	0.0045336	0.00445968	0.00526795	0.00330144	0.00227946	0.00218035	0.0036443	0.00202789	0.0031966	0.00183986	0.00319504	0.00496091	0.00285139	0.00256485	0.000276035	0.000366134	0.000366308
negative	Monoacylglycerol	MAG 18:1	0.00162812	0.0034952	0.00153575	0.00223566	0.00326751	0.00312579	0.00265762	0.00460524	0.00253736	0.00241773	0.00358234	0.00347281	0.00222369	0.00341404	0.00300256	0.000451373	0.0004179	0.000304921
positive	Phosphatidylcholines	PC 34:1	1.71747	2.25796	2.28044	2.15664	2.23384	2.49594	2.26003	2.38283	3.66808	2.52236	2.56637	2.51163	2.10313	2.34316	2.81711	0.131341	0.0603992	0.283905
positive	Phosphatidylcholines	PC 32:1 (1)	1.33874	1.74704	1.66451	1.58745	1.62728	1.83968	1.66615	1.68331	2.61093	1.90437	1.88744	1.80297	1.58443	1.7041	2.05143	0.0881415	0.0466853	0.187814
positive	Phosphatidylcholines	PC 36:2	1.22248	1.66272	1.55027	1.43972	1.54361	1.87271	1.53587	1.6484	2.35571	1.84248	1.79216	1.84771	1.4688	1.65014	1.95952	0.0938813	0.0784992	0.132657
positive	Phosphatidylcholines	PC 36:1	0.990339	1.33903	1.34164	1.30315	1.24649	1.34286	1.20428	1.30922	1.84007	1.33361	1.3424	1.34722	1.24354	1.27571	1.46583	0.0848559	0.0310762	0.124781
positive	Phosphatidylcholines	PC 34:2 (1)	0.822883	1.1531	1.09141	1.0398	0.971422	1.31931	0.972692	1.05971	1.58052	1.19755	1.16638	1.17386	1.0268	1.08078	1.27958	0.0718085	0.0821486	0.100534
positive	Phosphatidylcholines	PC 32:1 (2)	0.563132	0.740306	0.739134	0.779173	0.672744	0.841649	0.720741	0.764037	1.15071	0.850458	0.785008	0.835619	0.705436	0.749793	0.905449	0.0483382	0.0358481	0.0829457
positive	Phosphatidylcholines	PC 32:0	0.55216	0.614481	0.633167	0.57228	0.734968	0.822716	0.873701	0.775826	1.29292	0.8319	0.781671	0.814037	0.593022	0.801803	0.930133	0.0186461	0.0299282	0.121376
positive	Phosphatidylcholines	PC 34:2 (2)	0.370492	0.514074	0.467617	0.420313	0.50464	0.632497	0.469278	0.520238	0.713201	0.639634	0.540516	0.599578	0.443124	0.531663	0.623232	0.030862	0.0352611	0.0362456
positive	Phosphatidylcholines	PC 36:3	0.290082	0.366666	0.394739	0.363337	0.352731	0.379441	0.357301	0.359944	0.588584	0.402626	0.387212	0.37925	0.353706	0.362354	0.439418	0.0223467	0.00588734	0.0499581
positive	Phosphatidylcholines	PC 32:2	0.247597	0.313172	0.252161	0.238761	0.26312	0.314877	0.270355	0.261758	0.388069	0.346803	0.308995	0.29315	0.262923	0.277528	0.334254	0.0169791	0.0125921	0.0211761
positive	Phosphatidylcholines	PC 36:4 (2)	0.179699	0.215174	0.332615	0.323635	0.205841	0.186364	0.234238	0.218728	0.401162	0.237247	0.229648	0.228117	0.262781	0.211293	0.274043	0.0384589	0.0101363	0.0424198
positive	Phosphatidylcholines	PC 38:5 (2)	0	0.169535	0.245377	0.215273	0.180651	0.180901	0.212009	0.193454	0.364868	0.209618	0.200844	0.205406	0.157546	0.191754	0.245184	0.0547808	0.00738363	0.039935
positive	Phosphatidylcholines	PC 38:6 (3)	0.146664	0.16043	0.239162	0.237756	0.168939	0.140938	0.202684	0.162755	0.347921	0.168412	0.182458	0.168154	0.196003	0.168829	0.216736	0.024674	0.0127833	0.0438558
positive	Phosphatidylcholines	PC 38:2	0.13025	0.171828	0.176741	0.160947	0.17223	0.197179	0.163673	0.177421	0.255604	0.202759	0.195589	0.195808	0.159941	0.177626	0.21244	0.0104328	0.0071073	0.014484
positive	Phosphatidylcholines	PC 40:7 (2)	0.135273	0.147185	0.192825	0.179953	0.160421	0.151273	0.194938	0.167667	0.314684	0.166767	0.172164	0.175937	0.163809	0.168575	0.207388	0.0135191	0.00940598	0.0358148
positive	Phosphatidylcholines	PC 28:0	0.148921	0.158424	0.161887	0.183207	0.124851	0.132893	0.149164	0.146302	0.191047	0.157608	0.125111	0.138313	0.16311	0.138303	0.15302	0.00723802	0.00571669	0.0143245
positive	Phosphatidylcholines	PC 36:5 (2)	0.122153	0.132273	0.215249	0.207829	0.125417	0.10599	0.138036	0.127057	0.227432	0.134144	0.129214	0.12952	0.169376	0.124125	0.155078	0.0244772	0.00666247	0.0241446
positive	Phosphatidylcholines	PC 38:4 (2)	0.102341	0.118407	0.180623	0.164286	0.119473	0.11593	0.139493	0.135263	0.230599	0.164926	0.131578	0.140586	0.141414	0.12754	0.166922	0.0185214	0.00579078	0.0223635
positive	Phosphatidylcholines	PC 38:4 (1)	0.107711	0.0995173	0.112137	0.0923126	0.134083	0.143372	0.147631	0.141513	0.245719	0.154861	0.142866	0.14863	0.102919	0.14165	0.173019	0.00439695	0.00282867	0.0243568
positive	Phosphatidylcholines	PC 38:6 (2)	0.108135	0.109606	0.168355	0.142629	0.113777	0.105661	0.139334	0.118853	0.228803	0.14283	0.123317	0.12103	0.132181	0.119406	0.153995	0.0144498	0.00717661	0.025411
positive	Phosphatidylcholines	PC 34:3 (1)	0.125791	0.120621	0.133436	0.184617	0.106282	0.115365	0.114209	0.108856	0.188658	0.130272	0.115535	0.111424	0.141116	0.111178	0.136472	0.0147371	0.00216175	0.0178596
positive	Phosphatidylcholines	PC 38:3 (1)	0.0929196	0.118371	0.130117	0.126838	0.121601	0.120245	0.117943	0.128178	0.19342	0.13309	0.121218	0.127137	0.117061	0.121992	0.143716	0.0084191	0.00219579	0.0167443
positive	Phosphatidylcholines	PC 42:1	0.103772	0.157599	0.174548	0.169241	0.0858769	0.0803597	0.0733869	0.0835135	0.10503	0.0837042	0.0837251	0.0819123	0.15129	0.0807842	0.088593	0.0162301	0.00271239	0.0054956
positive	Phosphatidylcholines	PC 40:2	0.0828752	0.113332	0.114227	0.106926	0.0962143	0.105753	0.086121	0.0941678	0.129946	0.107108	0.101043	0.101763	0.10434	0.0955639	0.109965	0.00733736	0.00403473	0.00679629
positive	Phosphatidylcholines	PC 38:5 (1)	0.0785014	0.081297	0.117919	0.116915	0.085646	0.0736056	0.1074	0.091849	0.184678	0.0908701	0.0997102	0.0953084	0.0986581	0.0896253	0.117642	0.0108474	0.00703187	0.0224181
positive	Phosphatidylcholines	PC 40:6 (2)	0.0745545	0.0823005	0.114094	0.107348	0.0828142	0.0678999	0.0913227	0.0912501	0.155162	0.0776002	0.0822234	0.0874867	0.0945742	0.0833217	0.100618	0.00955519	0.00551487	0.0182932
positive	Phosphatidylcholines	PC 40:1	0.0842015	0.128536	0.145303	0.144246	0.069149	0.0691192	0.0599244	0.0683143	0.0842653	0.0730537	0.0684782	0.0710176	0.125571	0.0666267	0.0742037	0.0143129	0.00224246	0.003482
positive	Phosphatidylcholines	PC 42:2	0.0741892	0.104757	0.110801	0.0994201	0.0785039	0.0777186	0.0695002	0.0764668	0.0960549	0.0859257	0.0773178	0.0780447	0.0972919	0.0755474	0.0843358	0.0080441	0.00205889	0.00436555
positive	Phosphatidylcholines	PC 38:3 (2)	0.0610111	0.081177	0.0877182	0.0832985	0.077107	0.089597	0.07434	0.0856887	0.11612	0.0936622	0.0803151	0.0944816	0.0783012	0.0816832	0.0961448	0.00592221	0.00357697	0.00740791
positive	Phosphatidylcholines	PC 40:6 (1)	0.0557753	0.0551685	0.0720861	0.0647545	0.0631641	0.0628415	0.078979	0.0708641	0.129475	0.067283	0.0715345	0.0731508	0.0619461	0.0689622	0.0853609	0.00402824	0.00381919	0.0147567
positive	Phosphatidylcholines	PC 34:3 (2)	0.0511027	0.0669961	0.0624513	0.0626441	0.0583303	0.0828469	0.065616	0.0649149	0.0979218	0.083851	0.0667071	0.0767997	0.0607985	0.067927	0.0813199	0.003398	0.00523701	0.00655741
positive	Phosphatidylcholines	PC 38:7	0.0679666	0.0679554	0.0613672	0.0572487	0.0450372	0.0420072	0.0569609	0.0484113	0.0859521	0.0518123	0.0487541	0.0483758	0.0636345	0.0481042	0.0587236	0.00263558	0.00322898	0.00910871
positive	Phosphatidylcholines	PC 40:3	0.0429865	0.0529754	0.0565314	0.0547417	0.0510887	0.0594586	0.0509675	0.0539039	0.0765897	0.0618666	0.0537958	0.0588399	0.0518088	0.0538547	0.062773	0.003029	0.00198729	0.00489714
positive	Phosphatidylcholines	PC 36:0	0.0392201	0.0463828	0.0485922	0.0443654	0.0504091	0.0492958	0.0529939	0.0513775	0.0739161	0.0519204	0.049398	0.0520466	0.0446401	0.0510191	0.0568203	0.00200224	0.0007837	0.00573117
positive	Phosphatidylcholines	PC 34:4 (2)	0.0377452	0.0470962	0.0600794	0.0617676	0.034954	0.0424207	0.0415161	0.0544533	0.0795038	0.0522522	0.0386885	0.0499867	0.0516721	0.043336	0.0551078	0.00568258	0.00406205	0.00865611
positive	Phosphatidylcholines	PC 36:4 (1)	0.0323596	0.03801	0.0413369	0.0370365	0.0367384	0.037568	0.0456479	0.035446	0.0790071	0.0422647	0.0474158	0.0402106	0.0371858	0.0388501	0.0522245	0.00185349	0.00230762	0.00905521
positive	Phosphatidylcholines	PC 44:1	0.0353314	0.0535474	0.0445504	0.040047	0.039586	0.0423874	0.0298533	0.0401976	0.0496645	0.0381264	0.0374413	0.0339745	0.0433691	0.0380061	0.0398017	0.00387979	0.00278333	0.00341089
positive	Phosphatidylcholines	PC 40:5	0.0296304	0.0329606	0.0460494	0.0448952	0.0343039	0.0304523	0.0409238	0.0394102	0.0680843	0.0357148	0.0375655	0.038467	0.0383839	0.0362726	0.0449579	0.00415523	0.00240191	0.00773005
positive	Phosphatidylcholines	PC 40:4	0.0304372	0.0336225	0.0428196	0.0417654	0.0318485	0.0338272	0.0386839	0.0349266	0.0677524	0.0387247	0.0329906	0.0364829	0.0371611	0.0348216	0.0439876	0.00304069	0.00143634	0.00800895
positive	Phosphatidylcholines	PC 36:6 (2)	0.0278449	0.0285281	0.0356498	0.0370509	0.024278	0.0220332	0.0294514	0.0267013	0.0431764	0.0290299	0.0245086	0.0263792	0.0322684	0.025616	0.0307735	0.00237808	0.00159465	0.00423706
positive	Phosphatidylcholines	PC 38:6 (1)	0.0240385	0.0235908	0.0289848	0.0259116	0.0261315	0.0247882	0.0305144	0.0271855	0.0483294	0.0289422	0.0287507	0.0281913	0.0256314	0.0271549	0.0335534	0.0012256	0.00122257	0.0049279
positive	Phosphatidylcholines	PC 44:2	0.0228039	0.0326961	0.026851	0.0240665	0.0266021	0.0285797	0.0233177	0.0264806	0.0322246	0.030729	0.025953	0.0267928	0.0266044	0.026245	0.0289248	0.00219952	0.00108791	0.0015144
positive	Phosphatidylcholines	PC 40:8	0.018556	0.0173548	0.0277918	0.0257068	0.021735	0.0182209	0.0268971	0.0233614	0.0399801	0.0236219	0.0218419	0.0235715	0.0223523	0.0225536	0.0272538	0.00258567	0.00180187	0.0042622
positive	Phosphatidylcholines	PC 44:12	0.0114874	0.00987782	0.0206936	0.0209785	0.0181848	0.0116109	0.0197778	0.0200407	0.0324121	0.0169801	0.0169327	0.0189525	0.0157593	0.0174035	0.0213193	0.00294997	0.00197394	0.0037274
positive	Phosphatidylcholines	PC 36:5 (1)	0.0152616	0.0154839	0.021022	0.0210385	0.0144223	0.0133807	0.0178826	0.0158208	0.0269324	0.0170174	0.0142137	0.0157625	0.0182015	0.0153766	0.0184815	0.00163381	0.000973458	0.00287472
positive	Phosphatidylcholines	PC 36:6 (1)	0.016904	0.0162145	0.0253133	0.0280817	0.0127561	0.0110165	0.0141278	0.0136466	0.0198668	0.0149661	0.0135814	0.0138062	0.0216284	0.0128867	0.0155551	0.00298404	0.000685116	0.00146889
positive	Phosphatidylcholines	PC 40:7 (1)	0.00943446	0.00907852	0.0107701	0.00975789	0.0106692	0.0105083	0.0140102	0.011126	0.0215419	0.0116475	0.0116998	0.0118	0.00976024	0.0115784	0.0141723	0.000364088	0.000821078	0.00245674
positive	Phosphatidylcholines	PC 34:5	0.00854718	0.00795435	0.0135206	0.0182132	0.00535385	0.0048169	0.00626256	0.00581848	0.00903647	0.00635669	0.00535967	0.00587346	0.0120588	0.00556295	0.00665657	0.00240125	0.00031025	0.000818996
positive	Phosphatidylcholines	PC(O-16:0/0:0)	0.00534952	0.00767355	0.0103707	0.0107688	0.00494487	0.00445251	0.00509058	0.00555368	0.00604722	0.00531337	0.00506692	0.00548401	0.00854064	0.00501041	0.00547788	0.00126652	0.000226774	0.000208194
positive	Phosphatidylcholines	PC 34:4 (1)	0.0021524	0.00227917	0.0024534	0.00291289	0.00164815	0.00138277	0.00152297	0.00154563	0.00242663	0.00169137	0.00151065	0.0014832	0.00244947	0.00152488	0.00177796	0.00016634	5.46374e-05	0.0002211
positive	Phosphatidylcholines	PC(P-16:0/0:0)	0.00151975	0.00210726	0.00277201	0.00291574	0.00108808	0.00108797	0.00112337	0.00124001	0.00153834	0.00135881	0.00144698	0.00147623	0.00232869	0.00113486	0.00145509	0.000322048	3.60274e-05	3.73184e-05
positive	Ether-linked phosphatidylcholines	PC O-34:0	0.703724	0.97462	0.981451	0.9092	1.02965	1.16293	0.931087	1.05071	1.40857	1.09883	1.10488	1.10392	0.892249	1.04359	1.17905	0.0649172	0.0475606	0.0765187
positive	Ether-linked phosphatidylcholines	PC O-38:1	0.104469	0.147156	0.158061	0.146904	0.142727	0.154004	0.11949	0.144182	0.162323	0.155243	0.136681	0.150699	0.139147	0.140101	0.151236	0.0118485	0.00731244	0.00540905
positive	Ether-linked phosphatidylcholines	PC O-36:4	0.0701412	0.0861208	0.144727	0.143625	0.0967506	0.0851846	0.0969818	0.0992953	0.163472	0.0972023	0.097526	0.0969032	0.111153	0.094553	0.113776	0.0193438	0.00317522	0.0165658
positive	Ether-linked phosphatidylcholines	PC O-38:5	0.0368995	0.0476011	0.067544	0.0677105	0.0470906	0.0473812	0.0471514	0.0502882	0.0854154	0.0545609	0.0514434	0.0524797	0.0549388	0.0479778	0.0609748	0.00764453	0.000772654	0.0081726
positive	Ether-linked phosphatidylcholines	PC O-38:4	0.0287538	0.0344688	0.0563425	0.0602713	0.0372915	0.0317799	0.0382118	0.0384736	0.0624217	0.0349398	0.0396944	0.0366598	0.0449591	0.0364392	0.0434289	0.0078353	0.00157366	0.00640676
positive	Phosphatidylethanolamines	PE 33:1 (1)	26.0182	13.3922	11.5524	16.4161	9.23082	7.06116	8.99074	8.61332	6.59631	8.96496	6.6562	8.71156	16.8447	8.47401	7.73226	3.21798	0.487794	0.64076
positive	Phosphatidylethanolamines	PE 36:1 (1)	19.558	10.1754	11.5519	15.3615	8.01743	5.14366	7.43316	6.90785	6.29407	6.24974	5.58316	7.27226	14.1617	6.87553	6.34981	2.10675	0.620169	0.347827
positive	Phosphatidylethanolamines	PE 38:2 (1)	13.0901	7.06859	7.22377	9.35755	5.49923	3.77735	4.93858	4.69051	4.20829	4.41562	3.87261	5.12159	9.185	4.72642	4.40453	1.40253	0.358733	0.263906
positive	Phosphatidylethanolamines	PE 38:4 (2)	6.47625	3.63413	4.2066	4.89015	3.01877	2.25743	3.09064	2.69228	2.53918	2.88627	1.91246	2.80614	4.80178	2.76478	2.53601	0.614363	0.190033	0.220696
positive	Phosphatidylethanolamines	PE 36:1 (2)	5.34889	3.2492	3.31802	3.84244	3.21032	2.45418	2.87372	2.91665	2.38614	2.91342	2.23277	3.08728	3.93964	2.86372	2.6549	0.48807	0.15566	0.204981
positive	Phosphatidylethanolamines	PE 33:1 (2)	6.1252	3.2696	3.07984	4.79313	2.1924	1.71061	2.16526	2.09964	1.63002	2.11235	1.52643	2.19114	4.31694	2.04197	1.86499	0.714371	0.112158	0.167679
positive	Phosphatidylethanolamines	PE 34:0	4.85782	2.19614	2.92425	3.88741	2.08514	1.37848	2.28452	1.89621	1.8132	1.75674	1.40242	2.01211	3.46641	1.91109	1.74612	0.578849	0.19443	0.126982
positive	Phosphatidylethanolamines	PE 40:2 (1)	4.21685	2.36263	2.56843	3.36652	1.85726	1.24224	1.6813	1.60375	1.44343	1.46553	1.27284	1.68738	3.12861	1.59614	1.4673	0.422433	0.129338	0.0850596
positive	Phosphatidylethanolamines	PE 38:5	3.67383	1.9279	2.49374	2.95323	1.82132	1.26429	1.7919	1.63841	1.45698	1.47272	1.17934	1.6364	2.76217	1.62898	1.43636	0.369198	0.128004	0.0947904
positive	Phosphatidylethanolamines	PE 36:4	1.605	1.00329	1.06082	1.17917	0.740779	0.637026	0.782053	0.700992	0.624679	0.790931	0.490402	0.754004	1.21207	0.715213	0.665004	0.135998	0.0308716	0.0682463
positive	Phosphatidylethanolamines	PE 38:4 (1)	0.735717	0.343799	0.562502	0.732079	0.276128	0.166953	0.274771	0.238427	0.242553	0.245607	0.182483	0.263508	0.593524	0.23907	0.233538	0.0925299	0.0255753	0.0176347
positive	Phosphatidylethanolamines	PE 32:1	0.347828	0.252391	0.189311	0.20664	0.189045	0.193209	0.176747	0.168669	0.146351	0.233105	0.137064	0.203695	0.249042	0.181918	0.180054	0.0355148	0.00563154	0.023017
positive	Phosphatidylethanolamines	PE 38:2 (2)	0.267863	0.136924	0.134257	0.171119	0.115931	0.0909504	0.109795	0.117505	0.116561	0.107864	0.0757399	0.117617	0.177541	0.108545	0.104446	0.031255	0.00609617	0.00981485
positive	Phosphatidylethanolamines	PE 40:2 (2)	0.183312	0.110824	0.111905	0.127699	0.0956429	0.0706575	0.106124	0.0841146	0.107013	0.0751477	0.0685308	0.091309	0.133435	0.0891347	0.0855001	0.0170671	0.00762452	0.00862012
positive	Phosphatidylethanolamines	PE 34:4	0.0991193	0.0540272	0.0548225	0.0655609	0.0361459	0.0329478	0.037639	0.0347738	0.027729	0.0440478	0.0207786	0.0391897	0.0683824	0.0353766	0.0329363	0.0105777	0.000998846	0.00530328
negative	Phosphatidylethanolamines	PE 32:0	0.0027671	0.00211503	0.00234362	0.00221858	0.00383236	0.00388086	0.00538996	0.00415917	0.00724683	0.00377761	0.00386091	0.00374994	0.00236108	0.00431559	0.00465882	0.000143178	0.00036529	0.000862992
negative	Sphingomyelins	SM d18:1/C24:1	18.4151	19.1073	19.1739	17.3674	20.2836	19.935	21.3394	20.5295	25.3704	20.3177	21.3126	20.9432	18.5159	20.5219	21.986	0.419521	0.298543	1.14668
negative	Sphingomyelins	SM d18:1/C24:0	11.5931	15.0377	17.4473	13.7359	18.9816	18.4892	18.256	16.9436	24.1877	17.2133	22.1116	18.9625	14.4535	18.1676	20.6188	1.2248	0.435109	1.56275
positive	Sphingomyelins	SM d18:1/C22:0	2.78579	3.21489	3.23797	2.68587	3.93044	3.47172	3.77546	3.56471	5.08205	3.65132	3.89668	3.6833	2.98113	3.68558	4.07834	0.143161	0.103433	0.338975
positive	Sphingomyelins	SM d18:1/C14:0	2.60086	2.56975	2.93715	2.99942	2.50455	2.39097	2.70724	2.51461	2.887	2.57992	2.3672	2.59651	2.7768	2.52934	2.60766	0.111464	0.0655901	0.106751
negative	Sphingomyelins	SM d18:1/C18:1	0.431303	0.488397	0.391194	0.332499	0.357576	0.349537	0.399403	0.397184	0.539394	0.418148	0.42599	0.368529	0.410848	0.375925	0.438015	0.0328598	0.0130261	0.0361078
positive	Triacylglycerides	TAG 50:1	3.87557	3.32872	4.26963	4.47821	4.17685	3.30204	0	3.85832	5.28568	3.98502	4.16632	3.99702	3.98803	2.8343	4.35851	0.252803	0.961904	0.311816
positive	Triacylglycerides	TAG 50:2	3.58873	2.78121	3.451	3.21416	3.83372	3.151	4.45105	3.43305	0	3.96404	3.80619	3.71355	3.25878	3.71721	2.87095	0.176986	0.281875	0.958378
positive	Triacylglycerides	TAG 48:0	1.04927	0.927319	1.25638	1.54465	1.12695	0.811463	1.23308	1.04107	1.41716	0.979025	1.10687	1.01595	1.1944	1.05314	1.12975	0.135065	0.0896187	0.0994984
positive	Triacylglycerides	TAG 46:1	0.9059	0.847152	0.990423	0.976001	0	0.893322	1.2264	1.04486	1.4797	1.10703	1.02064	1.03955	0.929869	0.791146	1.16173	0.0331809	0.272361	0.107598
positive	Triacylglycerides	TAG 54:6	0	0.737676	0.759144	0.651932	0.784643	0.74808	0.939769	0.798865	1.20596	0.824854	0.795489	0.872713	0.537188	0.817839	0.924755	0.180554	0.0420269	0.0950769
positive	Triacylglycerides	TAG 46:0	0.564179	0.481007	0.646354	0.799534	0.629415	0	0.70743	0.596038	0.806909	0.574237	0.590426	0	0.622769	0.483221	0.492893	0.0679038	0.162756	0.172646
positive	Triacylglycerides	TAG 46:2	0.135192	0.315175	0.367033	0.317194	0.38652	0.347383	0.469508	0.376523	0.583857	0.417049	0.382608	0.412406	0.283648	0.394984	0.44898	0.0509178	0.0261919	0.0456018
positive	Triacylglycerides	TAG 56:5	0	0.275553	0.424162	0.390178	0.363185	0.270982	0.490065	0.357086	0.582292	0.397118	0.364235	0.417668	0.272473	0.370329	0.440328	0.0962267	0.045123	0.0485836
positive	Triacylglycerides	TAG 56:7	0.3114	0.184355	0.370624	0.314164	0.294849	0.170492	0.391358	0.272176	0.469368	0.279022	0.271005	0.271478	0.295136	0.282219	0.322718	0.0393672	0.0453274	0.0489176
positive	Triacylglycerides	TAG 48:3	0.303397	0.238024	0.199119	0.161758	0.31284	0.261632	0.265196	0.202771	0.433244	0.349902	0.306653	0.215328	0.225575	0.26061	0.326282	0.0302541	0.0225376	0.0453641
positive	Triacylglycerides	TAG 50:4	0.147439	0.112593	0.122681	0.107603	0.1392	0.114373	0.149276	0.117565	0.191081	0.127035	0.12584	0.132908	0.122579	0.130104	0.144216	0.00886014	0.00844098	0.0156979
positive	Triacylglycerides	TAG 42:2	0.067777	0.0778997	0.0768414	0.0648211	0.0783504	0.0845444	0.0994194	0.0848819	0.142093	0.0836115	0.0855727	0.104244	0.0718348	0.086799	0.10388	0.00325968	0.00446666	0.0135597
positive	Triacylglycerides	TAG 60:9	0.030611	0	0.0383436	0.0293903	0.028395	0	0.0401222	0.025567	0.0598874	0.0285799	0.0283748	0.0278591	0.0245862	0.023521	0.0361753	0.00843171	0.00844974	0.00790548
negative	Fatty acids	Stearic acid (Octadecanoic acid)	2.46745	1.87725	1.47763	1.91275	1.79973	1.56196	2.34404	2.09919	2.9221	1.82714	1.49231	2.1245	1.93377	1.95123	2.09151	0.203411	0.170948	0.30549
negative	Fatty acids	Palmitic acid (Hexadecanoic acid)	1.24668	1.30124	0.801909	1.14903	1.1337	1.04469	1.20187	1.43718	1.51518	1.29184	1.048	1.48598	1.12471	1.20436	1.33525	0.112113	0.0840125	0.107817
negative	Fatty acids	(Z)-9-Octadecanoic acid (Oleic acid)	0.522994	1.2694	0.633594	1.10492	1.37083	1.5693	1.05957	1.5555	0.940392	1.02984	1.32405	1.16842	0.882726	1.3888	1.11568	0.180361	0.118704	0.083813
negative	Fatty acids	(Z)-15-Tetracosenoic acid (Nervonic acid)	0.534599	0.543858	0.556385	0.531213	0.466565	0.342336	0.492133	0.466235	0.549868	0.348409	0.359785	0.383575	0.541514	0.441817	0.410409	0.00563162	0.0337106	0.0470599
negative	Fatty acids	Lignoceric acid	0.205275	0.288734	0.295757	0.266057	0.265985	0.200731	0.250307	0.237924	0.313866	0.187576	0.208484	0.219703	0.263956	0.238736	0.232407	0.020561	0.0139088	0.0279569
negative	Fatty acids	Arachidonic acid	0.0340399	0.186126	0.0782892	0.225321	0.34008	0.199393	0.121226	0.392186	0.088816	0.165174	0.363058	0.27701	0.130944	0.263221	0.223514	0.0448284	0.0624339	0.0604714
negative	Fatty acids	Behenic acid	0.21859	0.224417	0.244943	0.218003	0.191264	0.131519	0.197498	0.177016	0.215662	0.139151	0.140441	0.158093	0.226488	0.174324	0.163337	0.00631965	0.0148983	0.017969
negative	Fatty acids	Palmitoleic acid ((Z)-9-Hexadecenoic acid)	0.0338471	0.112733	0.0383299	0.0772419	0.161245	0.132961	0.0940968	0.152074	0.0587053	0.0878573	0.12157	0.107496	0.065538	0.135094	0.0939072	0.0185044	0.0148815	0.0136188
negative	Fatty acids	(Z)-11-Eicosenoic acid-like	0.0735335	0.0957195	0.0940613	0.131548	0.0968236	0.0867957	0.0985673	0.10101	0.0992064	0.0749172	0.0880075	0.083153	0.0987156	0.0957991	0.086321	0.0120511	0.00312151	0.00507412
negative	Fatty acids	(z)-4,7,10,13,16,19-Docosahexaenoic acid	0.0178403	0.0792418	0.0399541	0.0911223	0.126269	0.108223	0.0690434	0.13427	0.0503155	0.0925113	0.126607	0.0912995	0.0570396	0.109451	0.0901832	0.0170369	0.014529	0.0156065
negative	Fatty acids	Linoleic acid ((E)-9,12-octadecadienoic acid)	0.0265409	0.0548875	0.0262114	0.0470586	0.0641468	0.0700877	0.0523037	0.0914611	0.0549905	0.0503123	0.0707482	0.0560651	0.0386746	0.0694998	0.058029	0.00727843	0.00820064	0.0044198
negative	Fatty acids	Cerotic acid	0.0297561	0.0533847	0.0497241	0.0423064	0.056747	0.0490999	0.0512964	0.0527145	0.0865896	0.0510478	0.0531552	0.0480492	0.0437928	0.0524644	0.0597105	0.00521554	0.00160953	0.00902075
negative	Fatty acids	Tricosylic acid (tricosanoate)	0.0528049	0.0564538	0.0624658	0.0510513	0.0506275	0.0399303	0.0511517	0.0504489	0.0621064	0.0392273	0.0391234	0.0460559	0.0556939	0.0480396	0.0466283	0.00252217	0.00270723	0.00540831
negative	Fatty acids	Eicosanoic acid (arachidic acid)	0.0562916	0.0471649	0.0516953	0.0555159	0.04537	0.0329816	0.0569156	0.0450714	0.0705198	0.0394275	0.036161	0.0456952	0.0526669	0.0450847	0.0479509	0.00209107	0.00488651	0.00777868
negative	Fatty acids	Margaric acid (1-heptadecanoic acid)	0.0487254	0.0361903	0.0348405	0.0427717	0.0381522	0.0307404	0.0535276	0.0406678	0.0707095	0.0341006	0.0319475	0.0391205	0.040632	0.040772	0.0439695	0.00320614	0.00474527	0.0090391
negative	Fatty acids	(Z)-5,8,11-Eicosatrienoic acid	0.00718922	0.0309789	0.0128747	0.0248019	0.0509924	0.053326	0.0244181	0.065591	0.0185525	0.0378947	0.0623746	0.0536968	0.0189612	0.0485819	0.0431296	0.00543266	0.00866754	0.00963273
negative	Fatty acids	(Z)-5,8,11,14,17-Eicosapentaenoic acid	0.00493547	0.0330176	0.0159639	0.0452084	0.0655586	0.0286144	0.0173197	0.0752877	0.0132706	0.0261387	0.0603656	0.0556011	0.0247813	0.0466951	0.038844	0.00892891	0.0140333	0.0113996
negative	Fatty acids	Cerotic acid	0.0374021	0.0345422	0.0368299	0.0457996	0.0333246	0.0281503	0.0429386	0.0331533	0.0471596	0.027969	0.0300622	0.0278454	0.0386434	0.0343917	0.033259	0.00246408	0.00309133	0.00466135
negative	Fatty acids	Myristic acid (1-tetradecanoic acid)	0.0206585	0.0264812	0.0177183	0.0270929	0.0280389	0.0252984	0.0288235	0.0296598	0.0323211	0.0273686	0.0245057	0.0268456	0.0229877	0.0279551	0.0277603	0.0022776	0.000945394	0.00164275
negative	Fatty acids	(Z)-11-Eicosenoic acid	0.0155439	0.0175688	0.0180805	0.0251257	0.0142131	0.0194323	0.0266799	0.0201519	0.027667	0.0177528	0.0208706	0.0142858	0.0190797	0.0201193	0.020144	0.00208842	0.00255601	0.00284546
negative	Fatty acids	pentacosanoic acid	0.0116857	0.0181244	0.0184726	0.0162429	0.0194055	0.0176987	0.0198886	0.0184324	0.0256955	0.017139	0.01618	0.0159174	0.0161314	0.0188563	0.018733	0.0015607	0.000490487	0.00233564
negative	Fatty acids	(Z)-8,11,14-Eicosatrienoic acid	0.00635168	0.0120972	0.00751273	0.0112365	0.0161243	0.0143667	0.0162117	0.0164327	0.0127911	0.0140943	0.0177517	0.0126238	0.00929954	0.0157839	0.0143152	0.00139826	0.000476822	0.00119173
negative	Fatty acids	Nonadecylic acid	0.0170079	0.00998832	0.0119614	0.0133691	0.00944256	0.00766841	0.0173421	0.00970366	0.0159902	0.00796276	0.00813372	0.0106097	0.0130817	0.0110392	0.0106741	0.00148104	0.00214907	0.00187238
negative	Fatty acids	(z)-7,10,13,16-Docosatetraenoic acid	0.00562796	0.0101878	0.00744471	0.0141656	0.0130016	0.0111499	0.0154069	0.0126758	0.0102583	0.012087	0.0132765	0.01053	0.0093565	0.0130585	0.0115379	0.00185686	0.000880712	0.000705788
negative	Fatty acids	Pentadecylic acid	0.00675839	0.0100379	0.00608342	0.0102845	0.00972366	0.00933943	0.0108061	0.0108058	0.0150871	0.0104843	0.00824565	0.0113776	0.00829104	0.0101687	0.0112987	0.00108964	0.000376152	0.00142428
negative	Fatty acids	Nonadecylic acid-like	0.00738525	0.00408527	0.00609185	0.00550651	0.0049257	0.00390341	0.00726452	0.00425043	0.00901603	0.00422994	0.00398765	0.00436646	0.00576722	0.00508601	0.00540002	0.000684368	0.000756547	0.00120788
negative	Fatty acids	heneicosanoic acid	0.0060614	0.00591987	0.00715997	0.0060497	0.0045134	0.00353965	0.00455814	0.00406363	0.0067223	0.0041605	0.00323469	0.00413002	0.00629774	0.0041687	0.00456188	0.000289196	0.000237561	0.000751467
positive	Steryl esters	18:2 Cholesteryl ester	0.0284097	0.0299018	0.025875	0.0264091	0.0308506	0.0319958	0.0314429	0.0333554	0.0492993	0.0303923	0.031407	0.0295124	0.0276489	0.0319112	0.0351528	0.000928187	0.0005352	0.00473138
positive	Steryl esters	20:4 Cholesteryl ester	0.0261164	0.0252746	0.0191621	0.0207243	0.0244886	0.0244347	0.0260861	0.0266725	0.0373721	0.0247077	0.0255262	0.0231816	0.0228194	0.0254205	0.0276969	0.00169959	0.000566469	0.00326146
positive	Steryl esters	22:6 Cholesteryl Ester	0.0163815	0.0150876	0.0131247	0.0140267	0.0144636	0.0131418	0.0150855	0.015257	0.0222474	0.0126646	0.0150181	0.0139153	0.0146552	0.014487	0.0159613	0.000701465	0.000479691	0.0021498
positive	Steryl esters	18:3 Sitosteryl ester	0.0100056	0.0104679	0.00808372	0.00856903	0.00973062	0.00948497	0.0097359	0.0109121	0.0151707	0.00926844	0.00976008	0.00879479	0.00928158	0.00996589	0.0107485	0.000568202	0.000320782	0.00148719
positive	Steryl esters	22:5 Cholesteryl ester	0.00310381	0.00266619	0.00247482	0.00260425	0.00265718	0.00234648	0.00297691	0.00292276	0.00412891	0.00239265	0.00270643	0.00236925	0.00271227	0.00272583	0.00289931	0.000136468	0.000144466	0.000417013
positive	Steryl esters	18:2 Sitosteryl ester	0.0013778	0.00166532	0.00173004	0.0015583	0.0016328	0.00165849	0.00163921	0.00165986	0.00287587	0.0016067	0.00163895	0.0016039	0.00158286	0.00164759	0.00193135	7.69818e-05	6.82104e-06	0.000314939
positive	Steryl esters	22:4 Cholesteryl ester	0.000811447	0.000807695	0.000714719	0.000815511	0.000660983	0.000595514	0.000713453	0.000723504	0.00114664	0.000646135	0.000666763	0.000530941	0.000787343	0.000673363	0.00074762	2.42606e-05	2.9347e-05	0.000136322
positive	Steryl esters	18:3 Campesteryl ester	0.000123266	0.000137597	0.00013152	0.000124881	7.63465e-05	9.40922e-05	0	0.000137156	0.00020296	8.85617e-05	0.000137104	0	0.000129316	7.68986e-05	0.000107156	3.28766e-06	2.8636e-05	4.27234e-05
LIPID CLASSES - summed intensities		Steryl esters	0.0863296	0.0860088	0.0712966	0.0748321	0.0845606	0.0837519	0.0876799	0.0916403	0.132444	0.0817671	0.0868606	0.0799082	0.0796168	0.0869082	0.095245	0.00385181	0.00179029	0.0124865
		Fatty acids	5.71558	6.43982	4.65199	6.19078	6.47681	5.82324	6.42521	7.33316	7.33356	5.66582	5.77244	6.58205	5.74954	6.5146	6.33847	0.395492	0.310569	0.389699
		Triacylglycerides	10.9795	10.3067	12.9717	13.0496	12.1549	10.1553	10.4627	12.2088	12.6572	13.1165	13.0502	12.2207	11.8269	11.2454	12.7612	0.697307	0.544383	0.206715
		Sphingomyelins	35.8261	40.4181	43.1876	37.121	46.0578	44.6364	46.4774	43.9496	58.0666	44.1805	50.1141	46.5541	39.1382	45.2803	49.7288	1.66018	0.593225	3.03495
		Ceramides	2.55233	2.48485	2.35896	2.53001	2.19766	1.92781	2.25617	2.13104	2.66175	1.89226	1.99564	2.23979	2.48154	2.12817	2.19736	0.0432027	0.0715111	0.171082
		Glycosphingolipids	4.88642	6.74338	5.6639	4.90981	8.12723	9.76823	9.33172	8.53674	13.0254	10.1648	8.95379	8.81561	5.55088	8.94098	10.2399	0.436587	0.372225	0.976689
		Phosphatidylethanolamines	92.6067	49.1791	51.0349	67.3525	38.3902	27.485	36.7423	34.4073	29.6398	33.7378	26.6171	35.9989	65.0433	34.2562	31.4984	10.0539	2.40039	2.09268
		Ether-linked phosphatidylcholines	0.943987	1.28997	1.40813	1.32771	1.35351	1.48128	1.23292	1.38295	1.8822	1.44078	1.43023	1.44066	1.24245	1.36266	1.54847	0.102492	0.0511518	0.111273
		Phosphatidylcholines	10.6608	13.8465	14.3303	13.684	13.073	14.7568	13.5379	13.855	21.3414	15.1977	14.6757	14.793	13.1304	13.8057	16.5019	0.83456	0.355393	1.61701
		Lysophosphatidylcholines	0.102647	0.140606	0.166807	0.17649	0.0858808	0.0872204	0.0872711	0.101739	0.111846	0.106526	0.0939733	0.110288	0.146637	0.0905279	0.105658	0.0165065	0.00375095	0.00405184
		Lysophosphatidylethanolamines	0.318287	0.261841	0.254479	0.313759	0.164222	0.131314	0.159407	0.188315	0.104793	0.167215	0.115038	0.184748	0.287091	0.160815	0.142948	0.0167966	0.011691	0.019517
		Diacylglycerols	0.105276	0.0890201	0.066318	0.0749753	0.0822965	0.103321	0.138622	0.0996152	0.218921	0.0930013	0.107927	0.109438	0.0838973	0.105964	0.132322	0.00852409	0.0118109	0.0291037
* Numbers (1) and (2) following the lipid abbreviation indicate two adjacent liquid chromatography peaks representing molecules with the same m/z value (isomers)

## Sheet: Statistics by lipid species
	t-test	t-test	t-test
class	AS vs CTR	AS vs VEH	CTR vs VEH
(Z)-11-Eicosenoic acid	0.763458	0.773183	0.995054
(Z)-11-Eicosenoic acid-like	0.822562	0.379775	0.162717
(z)-13-Docosenoic acid (Eruccic acid)	0.323485	0.346553	0.846212
(Z)-15-Tetracosenoic acid (Nervonic acid)	0.057693	0.0676067	0.60698
(z)-4,7,10,13,16,19-Docosahexaenoic acid	0.0577832	0.201427	0.401008
(Z)-5,8,11,14,17-Eicosapentaenoic acid	0.235748	0.368972	0.679291
(Z)-5,8,11-Eicosatrienoic acid	0.0274901	0.0715275	0.688589
(z)-7,10,13,16-Docosatetraenoic acid	0.121725	0.314243	0.226537
(Z)-8,11,14-Eicosatrienoic acid (C20H34O2) C20:3	0.0046218	0.0341837	0.296135
(Z)-9-Octadecanoic acid (Oleic acid)	0.0575425	0.285886	0.109219
18:2 Cholesteryl ester	0.0072989	0.211077	0.543723
18:2 Sitosteryl ester	0.462882	0.353534	0.434034
18:3 Campesteryl ester	0.164198	0.640375	0.577788
18:3 Sitosteryl ester	0.334686	0.392375	0.639654
20:4 Cholesteryl ester	0.196735	0.233009	0.538454
22:4 Cholesteryl ester	0.0242129	0.791839	0.628379
22:5 Cholesteryl ester	0.947803	0.684773	0.707846
22:6 Cholesteryl Ester	0.849644	0.584533	0.547164
Arachidonic acid	0.136037	0.264818	0.663867
Behenic acid (C22H44O2) C22:0	0.0180617	0.0160963	0.654456
Cer d18:1/C16:0	8.58e-05	0.0120803	0.488432
Cer d18:1/C18:0	0.001663	0.0036566	0.887597
Cer d18:1/C18:1	0.0117094	0.0285928	0.693125
Cer d18:1/C20:0	0.0003432	0.0007734	0.502169
Cer d18:1/C22:0	0.0004082	0.0042409	0.898471
Cer d18:1/C24:0	0.259835	0.32539	0.549289
Cer d18:1/C24:1	0.0026529	0.0063779	0.855108
Cer d18:1/C26:0	0.0617582	0.106247	0.848975
Cer d18:1/C26:1	0.534324	0.68199	0.908516
Cerotic acid	0.163223	0.177468	0.483653
DAG 32:0	0.261097	0.392715	0.583837
DAG 32:1	0.710956	0.192166	0.179386
DAG 34:0	0.201689	0.137183	0.314111
DAG 34:1	0.0222814	0.1008	0.273407
DAG 36:0 (1)	0.959247	0.634403	0.655432
DAG 36:0 (2)	0.0828126	0.107444	0.628739
DAG 36:1	0.0193685	0.0152181	0.140841
DAG 36:2	0.122625	0.0351694	0.168586
DAG 38:2	0.102675	0.0084559	0.0762437
DAG 38:3 (1)	0.0111231	0.0014979	0.0704631
DAG 38:3 (2)	0.0004692	0.0026811	0.157261
DAG 38:4 (1)	0.512329	0.319944	0.582182
DAG 38:4 (2)	0.116179	0.107061	0.53865
DAG 38:5	0.794367	0.260409	0.350271
DAG 38:6	0.57499	0.252509	0.305321
DAG 40:6	0.987454	0.257393	0.234163
Eicosanoic acid (arachidic acid)	0.203608	0.579556	0.765588
GSL d18:1/C16:0	0.004412	0.0035992	0.189227
GSL d18:1/C18:0	0.0040145	0.0107708	0.358592
GSL d18:1/C18:1	0.979875	0.0183919	0.0357587
GSL d18:1/C22:0	0.0011011	0.0026958	0.27474
GSL d18:1/C24:0	0.002729	0.0129858	0.290302
GSL d18:1/C24:1	0.0003667	0.0061402	0.42674
heneicosanoic acid (C21H42O2) C21:0	0.0012733	0.0745047	0.635629
LacCer d18:1/C24:1	0.0316997	0.0142506	0.192946
LCB d18:1 SO	0.715367	0.642282	0.900666
Lignoceric acid	0.348859	0.39835	0.846076
Linoleic acid ((E)-9,12-octadecadienoic acid)	0.0307037	0.0634145	0.264274
lysoPC 16:0 (1)	0.11387	0.699028	0.169414
lysoPC 16:0 (2)	0.0326792	0.0557854	0.026732
lysoPC 16:1 (1)	0.0243152	0.158253	0.0809858
lysoPC 16:1 (2)	0.01366	0.0769065	0.0513723
lysoPC 18:0 (1)	0.0666936	0.188499	0.112282
lysoPC 18:0 (2)	0.0247793	0.0487508	0.222319
lysoPC 18:1 (1)	0.0808735	0.176184	0.056285
lysoPC 18:1 (2)	0.0068468	0.0259538	0.0726255
lysoPC 18:2 (1)	0.071055	0.196579	0.222396
lysoPC 18:2 (2)	0.0325925	0.0812965	0.181013
lysoPC 18:3	0.152524	0.692476	0.182612
lysoPC 20:0	0.0425949	0.0866467	0.362778
lysoPC 20:1	0.0360704	0.0838748	0.0110632
lysoPC 22:6 (1)	0.191631	0.998228	0.324676
lysoPC 22:6 (2)	0.0925882	0.222133	0.222586
lysoPE 16:0 (1)	0.339703	0.0802316	0.332134
lysoPE 16:0 (2)	0.0005482	0.0006617	0.504549
lysoPE 18:0	0.0002058	0.0003647	0.587597
lysoPE 18:1	0.0160018	0.018298	0.369064
lysoPE 18:2	0.0036896	0.0019687	0.600081
MAG 18:1	0.10112	0.202693	0.456678
Margaric acid (1-heptadecanoic acid)	0.981288	0.73973	0.764725
Myristic acid (1-tetradecanoic acid)	0.0906065	0.140137	0.92146
Nonadecylic acid	0.463638	0.352145	0.902261
Nonadecylic acid-like	0.529127	0.800245	0.832929
Palmitic acid (Hexadecanoic acid)	0.590316	0.22464	0.375235
Palmitoleic acid ((Z)-9-Hexadecenoic acid)	0.0263151	0.263084	0.0872341
PC 28:0	0.0360713	0.552724	0.376811
PC 32:0	0.001034	0.0674738	0.37271
PC 32:1 (1)	0.275442	0.0653577	0.16042
PC 32:1 (2)	0.48889	0.0823458	0.135734
PC 32:2	0.51546	0.0391627	0.0608918
PC 34:1	0.147905	0.0625893	0.193446
PC 34:2 (1)	0.638358	0.0867159	0.176595
PC 34:2 (2)	0.107732	0.0091437	0.120139
PC 34:3 (1)	0.134204	0.84766	0.251954
PC 34:3 (2)	0.29702	0.0320564	0.161621
PC 34:4 (1)	0.0018638	0.0513733	0.339505
PC 34:4 (2)	0.277753	0.751324	0.264342
PC 34:5	0.0722679	0.0772807	0.258278
PC 36:0	0.0250629	0.0916189	0.387393
PC 36:1	0.734003	0.191157	0.226088
PC 36:2	0.18888	0.0234121	0.0915288
PC 36:3	0.721101	0.168357	0.220644
PC 36:4 (1)	0.594285	0.195172	0.202317
PC 36:4 (2)	0.243055	0.850559	0.236873
PC 36:5 (1)	0.18799	0.935268	0.345764
PC 36:5 (2)	0.12472	0.691969	0.262727
PC 36:6 (1)	0.0576024	0.117635	0.150798
PC 36:6 (2)	0.0591736	0.768735	0.298036
PC 38:2	0.210789	0.0259119	0.0742982
PC 38:3 (1)	0.591511	0.204804	0.285869
PC 38:3 (2)	0.642322	0.108943	0.129257
PC 38:4 (1)	0.000311	0.0613738	0.288626
PC 38:4 (2)	0.501487	0.413488	0.139118
PC 38:5 (1)	0.510875	0.474799	0.278107
PC 38:5 (2)	0.578414	0.243645	0.2745
PC 38:6 (1)	0.412685	0.206744	0.287832
PC 38:6 (2)	0.458627	0.483729	0.238134
PC 38:6 (3)	0.365903	0.694637	0.334695
PC 38:7	0.0097824	0.623064	0.313959
PC 40:1	0.0244445	0.0334186	0.117074
PC 40:2	0.33497	0.594206	0.118281
PC 40:3	0.592713	0.105566	0.142482
PC 40:4	0.512639	0.455898	0.337435
PC 40:5	0.675409	0.482131	0.324528
PC 40:6 (1)	0.253135	0.176719	0.323353
PC 40:6 (2)	0.347105	0.779502	0.400212
PC 40:7 (1)	0.0893681	0.169853	0.355305
PC 40:7 (2)	0.782043	0.298366	0.334933
PC 40:8	0.951163	0.363472	0.348948
PC 42:1	0.0209199	0.0105928	0.249727
PC 42:2	0.0396529	0.206643	0.118491
PC 44:1	0.304291	0.515652	0.697527
PC 44:12	0.659528	0.286493	0.389025
PC 44:2	0.88836	0.418279	0.200703
PC(O-16:0/0:0)	0.0663705	0.0926391	0.17969
PC(P-16:0/0:0)	0.0332472	0.0720292	0.0008301
PCE 34:0	0.109059	0.0288724	0.183405
PCE 36:4	0.456379	0.921346	0.332055
PCE 38:1	0.947617	0.389138	0.266738
PCE 38:4	0.359268	0.884785	0.359506
PCE 38:5	0.430524	0.609039	0.209945
PE 32:0	0.0024978	0.0743018	0.726736
PE 32:1	0.154349	0.154199	0.941765
PE 33:1 (1)	0.0787272	0.0634299	0.392534
PE 33:1 (2)	0.0481597	0.037969	0.41405
PE 34:0	0.043663	0.055793	0.504109
PE 34:4	0.0517877	0.0241447	0.679926
PE 36:1 (1)	0.0160501	0.0322856	0.487597
PE 36:1 (2)	0.0804542	0.051377	0.448181
PE 36:4	0.0322057	0.0114308	0.527603
PE 38:2 (1)	0.0216685	0.0398045	0.497008
PE 38:2 (2)	0.112461	0.0671504	0.734855
PE 38:4 (1)	0.0101814	0.0278558	0.864523
PE 38:4 (2)	0.0193784	0.01329	0.462039
PE 38:5	0.0273351	0.0131706	0.272027
PE 40:2 (1)	0.0133237	0.0268127	0.437111
PE 40:2 (2)	0.0555268	0.04609	0.762832
pentacosanoic acid	0.146838	0.39011	0.961788
Pentadecylic acid	0.154457	0.144522	0.472148
SM d18:1/C14:0	0.104224	0.315153	0.554934
SM d18:1/C16:0	0.0160286	0.0402363	0.309299
SM d18:1/C18:1	0.361307	0.598025	0.156889
SM d18:1/C22:0	0.0072124	0.0245789	0.310202
SM d18:1/C24:0	0.028898	0.0209789	0.181524
SM d18:1/C24:1	0.0080229	0.0294903	0.26277
Stearic acid (Octadecanoic acid)	0.949736	0.682348	0.702501
TAG 42:2	0.0352842	0.0960897	0.27664
TAG 46:0	0.458898	0.510106	0.968806
TAG 46:1	0.647018	0.0851505	0.252625
TAG 46:2	0.0998305	0.0519488	0.344129
TAG 48:0	0.416978	0.713238	0.588012
TAG 48:3	0.388891	0.114278	0.24244
TAG 50:1	0.290107	0.391652	0.182443
TAG 50:2	0.217576	0.715713	0.42941
TAG 50:4	0.561205	0.275243	0.458633
TAG 54:6	0.218566	0.106273	0.343374
TAG 56:5	0.392706	0.17044	0.331749
TAG 56:7	0.836777	0.675839	0.565921
TAG 60:9	0.931799	0.354724	0.316083
Tricosylic acid (tricosanoate)	0.0840376	0.179524	0.823241
