# Supplementary material for: Nucleolin perturbation alters membrane lipid homeostasis
Source: Royal Society of Chemistry journal article supplement (doi:10.1039/d5mo00088b), 2025-10-28
Supplement: d5mo00088b9.xlsx [file d5mo00088b9.xlsx]

## Sheet: final
Ionization mode	Component name	Formula	Average module Mass error (ppm)	Average module RT error (min)	Average observed molecular CCS delta (%)	Adduct
neg	(Z)-11-Eicosenoic acid	C20H38O2	1.17877	-0.0156963	-1.13909	-H
neg	(Z)-11-Eicosenoic acid-like	C20H38O2	1.0477	-0.226505	-1.54189	-H
neg	(z)-13-Docosenoic acid (Eruccic acid)	C22H42O2	1.07604	0.0155875	-0.656249	-H
neg	(Z)-15-Tetracosenoic acid (Nervonic acid)	C24H46O2	1.19427	-0.0154406	-0.642209	-H
neg	(z)-4,7,10,13,16,19-Docosahexaenoic acid	C22H32O2	0.741507	0.0283962	-0.286352	-H
neg	(Z)-5,8,11,14,17-Eicosapentaenoic acid	C20H30O2	0.779959	0.0287596	-0.0739679	-H
neg	(Z)-5,8,11-Eicosatrienoic acid	C20H34O2	0.979591	0.00954763	-1.0432	-H
neg	(z)-7,10,13,16-Docosatetraenoic acid	C22H36O2	1.31153	0.00958175	-0.889564	-H
neg	(Z)-8,11,14-Eicosatrienoic acid	C20H34O2	1.12235	0.0663088	-0.711287	-H
neg	(Z)-9-Octadecanoic acid (Oleic acid)	C18H34O2	1.14575	0.0109003	0.229491	-H
Pos	18:2 Cholesteryl ester	C45H76O2	0.526238	0.0478806	-0.598369	+NH4
Pos	18:2 Sitosteryl ester	C47H80O2	0.944133	0.0831	-0.91901	+NH4
Pos	18:3 Campesteryl ester	C46H76O2	2.14673	0.196048	-1.67369	+NH4
Pos	18:3 Sitosteryl ester	C47H78O2	0.65714	0.0916959	-1.09599	+NH4
Pos	20:4 Cholesteryl ester	C47H76O2	0.694558	0.0630178	-0.415434	+NH4
Pos	22:4 Cholesteryl ester	C49H80O2	0.611555	0.0608714	-0.209941	+NH4
Pos	22:5 Cholesteryl ester	C49H78O2	0.710207	0.0686458	0.0524457	+NH4
Pos	22:6 Cholesteryl Ester	C49H76O2	0.71892	0.0459833	-0.783541	+NH4
neg	Arachidonic acid	C20H32O2	0.758486	0.0355883	-0.726899	-H
neg	Behenic acid	C22H44O2	1.0982	0.133647	-0.485714	-H
neg	Cer d18:1/C16:0	C34H67NO3	1.45326	0.00851353	0.185454	+CH3COO
Pos	Cer d18:1/C18:0	C36H71NO3	1.02442	0.114252	-2.14168	-OH
neg	Cer d18:1/C18:1	C36H69NO3	1.62324	-0.0258078	-0.612172	+CH3COO
Pos	Cer d18:1/C20:0	C38H75NO3	0.961713	0.108267	-1.43722	-OH
Pos	Cer d18:1/C22:0	C40H79NO3	0.805318	0.102369	-1.81591	-OH
neg	Cer d18:1/C24:0	C42H83NO3	1.91455	0.00201122	0.102833	+CH3COO
neg	Cer d18:1/C24:1	C42H81NO3	1.75089	-0.00183233	0.404009	+CH3COO
neg	Cer d18:1/C26:0	C44H87NO3	1.86005	0.00916227	0.154874	+CH3COO
Pos	Cer d18:1/C26:1	C44H85NO3	2.09311	0.0596757	-1.62417	-OH
neg	Cerotic acid	C26H52O2	1.4799	-0.169041	-0.283063	-H
Pos	DAG 32:0	C35H68O5	0.630161	0.0990668	-1.13846	+NH4
Pos	DAG 32:1	C35H66O10	0.640445	0.0893944	-2.72714	+NH4
Pos	DAG 34:0	C37H72O5	3.18104	0.0987216	-1.196	+NH4
Pos	DAG 34:1	C37H70O5	0.81751	0.105018	-0.963186	+NH4
Pos	DAG 36:0 (1)	C39H76O5	0.796324	0.0533096	-2.53679	+NH4
Pos	DAG 36:0 (2)	C39H76O5	1.37426	0.170796	-1.9902	+NH4
Pos	DAG 36:1	C39H74O5	0.832133	0.08222	-1.03936	+NH4
Pos	DAG 36:2	C39H72O5	0.833435	0.0771509	-1.4261	+NH4
Pos	DAG 38:2	C41H76O5	1.39669	0.0783965	-1.45183	+NH4
Pos	DAG 38:3 (1)	C41H74O5	0.75938	0.179417	0.00460847	+NH4
Pos	DAG 38:3 (2)	C41H74O5	0.70854	0.0812682	-2.12912	+NH4
Pos	DAG 38:4 (1)	C41H72O5	0.749341	0.0759262	-1.47483	+NH4
Pos	DAG 38:4 (2)	C41H72O5	0.94398	0.101405	-1.06385	+NH4
Pos	DAG 38:5	C41H70O5	0.847968	0.07445	-1.54406	+NH4
Pos	DAG 38:6	C41H68O5	4.06504	0.104692	-0.946406	+NH4
Pos	DAG 40:6	C43H72O5	0.721897	0.0786022	-1.23169	+NH4
neg	Eicosanoic acid (arachidic acid)	C20H40O2	1.25049	0.0117925	-0.766912	-H
neg	GSL d18:1/C16:0	C40H77NO8	1.01644	0.0139333	0.392037	+CH3COO
neg	GSL d18:1/C18:0	C42H81NO8	1.50724	0.00883738	-0.383737	+CH3COO
neg	GSL d18:1/C18:1	C42H79NO8	2.97839	0.0266136	-0.0183707	+CH3COO
Pos	GSL d18:1/C22:0	C46H89NO8	0.639971	0.131738	-1.02925	-OH
Pos	GSL d18:1/C24:0	C48H93NO8	0.927012	0.10148	-1.55511	-OH
neg	GSL d18:1/C24:1	C48H91NO8	1.82843	0.00673668	0.219647	+CH3COO
neg	heneicosanoic acid	C21H42O2	1.0615	0.000869195	-0.403302	-H
neg	LacCer d18:1/C24:1	C54H101NO13	2.38881	0.00283901	0.992764	+CH3COO
neg	LCB d18:1 SO	C26H52NO7P	0.759389	-0.138005	-0.677724	+CH3COO
neg	Lignoceric acid	C24H48O2	1.11349	0.00247343	-0.474823	-H
neg	Linoleic acid ((E)-9,12-octadecadienoic acid)	C18H32O2	0.896185	0.035942	-0.210518	-H
Pos	lysoPC 16:0 (1)	C24H50NO7P	1.04292	0.100407	-1.45045	+H
Pos	lysoPC 16:0 (2)	C24H50NO7P	0.850884	0.118506	-1.62403	+H
Pos	lysoPC 16:1 (1)	C24H48NO7P	0.909661	0.0857674	-0.517937	+H
Pos	lysoPC 16:1 (2)	C24H48NO7P	0.848866	0.268296	0.0731526	+H
Pos	lysoPC 18:0 (1)	C26H54NO7P	0.608994	0.139448	-0.682188	+H
Pos	lysoPC 18:0 (2)	C26H54NO7P	0.982077	0.139854	-0.795135	+H
Pos	lysoPC 18:1 (1)	C26H52NO7P	0.730238	0.124117	-1.12389	+H
Pos	lysoPC 18:1 (2)	C26H52NO7P	0.776029	0.11916	-1.63037	+H
Pos	lysoPC 18:2 (1)	C26H50NO7P	0.820235	0.11061	-1.19794	+H
Pos	lysoPC 18:2 (2)	C26H50NO7P	0.894028	0.143537	-1.06305	+H
Pos	lysoPC 18:3	C26H48NO7P	1.75227	0.27344	0.26101	+H
Pos	lysoPC 20:0	C28H58NO7P	0.711593	0.156056	-0.799806	+H
Pos	lysoPC 20:1	C28H56NO7P	0.648518	0.139393	-0.679759	+H
Pos	lysoPC 22:6 (1)	C30H50NO7P	0.910669	0.0899975	-0.903286	+H
Pos	lysoPC 22:6 (2)	C30H50NO7P	0.641077	0.094059	-0.988826	+H
Pos	lysoPE 16:0 (1)	C21H44NO7P	1.06123	0.116889	-0.987946	+H
Pos	lysoPE 16:0 (2)	C21H44NO7P	0.708377	0.126307	-1.17202	+H
Pos	lysoPE 18:0	C23H48NO7P	0.904856	0.146221	-1.20501	+H
Pos	lysoPE 18:1	C23H46NO7P	1.01954	0.13645	-1.02869	+H
Pos	lysoPE 18:2	C23H44NO7P	2.52385	0.109826	-1.22767	+H
neg	MAG 18:1	C21H40O4	1.12621	-0.155716	-0.0439087	+CH3COO
neg	Margaric acid (1-heptadecanoic acid)	C17H34O2	1.13497	0.0249842	-1.01523	-H
neg	Myristic acid (1-tetradecanoic acid)	C14H28O2	1.02411	0.00391407	-1.09822	-H
neg	Nonadecylic acid	C19H38O2	1.03486	-0.0213778	-0.55837	-H
neg	Nonadecylic acid-like	C19H38O2	1.37454	-0.210343	-0.765498	-H
neg	Palmitic acid (Hexadecanoic acid)	C16H32O2	0.885222	0.0150251	-0.600928	-H
neg	Palmitoleic acid ((Z)-9-Hexadecenoic acid)	C16H30O2	0.48454	0.00531299	-0.574878	-H
Pos	PC 28:0	C36H72NO8P	0.97017	0.127765	-1.49991	+H
Pos	PC 32:0	C40H80NO8P	1.05841	0.106977	-1.53468	+H
Pos	PC 32:1 (1)	C40H78NO8P	1.26567	0.0912628	-1.66285	+H
Pos	PC 32:1 (2)	C40H78NO8P	0.913724	0.263972	-1.48954	+H
Pos	PC 32:2	C40H76NO8P	0.813675	0.122006	-0.891275	+H
Pos	PC 34:1	C42H82NO8P	1.14648	0.1311	-1.18093	+H
Pos	PC 34:2 (1)	C42H80NO8P	0.791839	0.11131	-0.886544	+H
Pos	PC 34:2 (2)	C42H80NO8P	0.623234	0.260238	-0.61541	+H
Pos	PC 34:3 (1)	C42H78NO8P	0.603644	0.140811	-1.05174	+H
Pos	PC 34:3 (2)	C42H78NO8P	0.67639	0.262422	-1.49921	+H
Pos	PC 34:4 (1)	C42H76NO8P	1.19438	0.135085	-0.915979	+H
Pos	PC 34:4 (2)	C42H76NO8P	0.838869	0.118979	-1.28891	+H
Pos	PC 34:5	C42H74NO8P	0.550952	0.118135	-0.922328	+H
Pos	PC 36:0	C44H88NO8P	0.761367	0.137896	-0.869386	+H
Pos	PC 36:1	C44H86NO8P	0.883701	0.11453	-1.89509	+H
Pos	PC 36:2	C44H84NO8P	0.842565	0.0857058	-0.764646	+H
Pos	PC 36:3	C44H82NO8P	0.425194	0.129735	-0.128702	+H
Pos	PC 36:4 (1)	C44H80NO8P	0.605511	0.151763	-0.471549	+H
Pos	PC 36:4 (2)	C44H80NO8P	0.528482	0.108375	-0.418064	+H
Pos	PC 36:5 (1)	C44H78NO8P	0.697571	0.215459	-0.131328	+H
Pos	PC 36:5 (2)	C44H78NO8P	0.713533	0.145474	-1.533	+H
Pos	PC 36:6 (1)	C44H76NO8P	0.512874	0.107349	0.238695	+H
Pos	PC 36:6 (2)	C44H76NO8P	0.642076	0.112997	-0.0345432	+H
Pos	PC 38:2	C46H88NO8P	0.599803	0.0734712	-1.90649	+H
Pos	PC 38:3 (1)	C46H86NO8P	0.72393	0.097078	-1.27744	+H
Pos	PC 38:3 (2)	C46H86NO8P	0.753508	0.270711	-1.53703	+H
Pos	PC 38:4 (1)	C46H84NO8P	0.639138	0.267355	-0.510346	+H
Pos	PC 38:4 (2)	C46H84NO8P	0.760677	0.101786	-0.207464	+H
Pos	PC 38:5 (1)	C46H82NO8P	0.54219	0.102916	-1.53446	+H
Pos	PC 38:5 (2)	C46H82NO8P	0.58333	0.113538	-2.15907	+H
Pos	PC 38:6 (1)	C46H80NO8P	0.712368	0.220336	-0.597365	+H
Pos	PC 38:6 (2)	C46H80NO8P	0.514709	0.183757	-1.49912	+H
Pos	PC 38:6 (3)	C46H80NO8P	0.592026	0.0994964	-0.717242	+H
Pos	PC 38:7	C46H78NO8P	0.540298	0.284524	0.290625	+H
Pos	PC 40:1	C48H94NO8P	0.886725	0.124648	-0.470975	+H
Pos	PC 40:2	C48H92NO8P	0.711374	0.108804	-1.16638	+H
Pos	PC 40:3	C48H90NO8P	0.662506	0.0994948	0.499139	+H
Pos	PC 40:4	C48H88NO8P	0.725803	0.0933347	-1.40168	+H
Pos	PC 40:5	C48H86NO8P	0.916162	0.117658	-1.12946	+H
Pos	PC 40:6 (1)	C48H84NO8P	0.789389	0.170558	-1.37549	+H
Pos	PC 40:6 (2)	C48H84NO8P	0.720137	0.0937901	-1.86468	+H
Pos	PC 40:7 (1)	C48H82NO8P	1.35583	0.134744	-0.188098	+H
Pos	PC 40:7 (2)	C48H82NO8P	0.686661	0.108635	-1.70395	+H
Pos	PC 40:8	C48H80NO8P	0.796926	0.104809	-0.389128	+H
Pos	PC 42:1	C50H98NO8P	0.948206	0.116775	-0.140115	+H
Pos	PC 42:2	C50H96NO8P	1.01287	0.102852	-0.734591	+H
Pos	PC 44:1	C52H102NO8P	1.54155	0.121263	-0.0732335	+H
Pos	PC 44:12	C52H80NO8P	0.810559	0.0948176	-0.15822	+H
Pos	PC 44:2	C52H100NO8P	1.33466	0.106272	0.189156	+H
Pos	PC(O-16:0/0:0)	C24H52NO6P	0.763531	0.131935	-0.911875	+H
Pos	PC(P-16:0/0:0)	C24H50NO6P	0.865512	0.129717	-0.79862	+H
Pos	PCE 34:0	C42H84NO7P	0.762039	0.139144	-0.77133	+H
Pos	PCE 36:4	C44H82NO7P	0.755313	0.101787	-2.1861	+H
Pos	PCE 38:1	C46H92NO7P	3.23717	0.164787	-1.12671	+H
Pos	PCE 38:4	C46H86NO7P	1.41057	0.11079	-0.907163	+H
Pos	PCE 38:5	C46H84NO7P	0.852751	0.101549	-0.156067	+H
neg	PE 32:0	C37H74NO8P	1.82968	0.0162118	-0.281324	-H
Pos	PE 32:1	C37H72NO8P	2.1406	0.117997	-1.25813	+H
Pos	PE 33:1 (1)	C38H74NO8P	1.02995	0.124243	-1.4512	+H
Pos	PE 33:1 (2)	C38H74NO8P	0.626163	0.205662	-1.3973	+H
Pos	PE 34:0	C39H78NO8P	0.628947	0.122339	-1.64111	+H
Pos	PE 34:4	C39H70NO8P	1.57229	0.122143	-1.56436	+H
Pos	PE 36:1 (1)	C41H80NO8P	0.387085	0.128841	-1.73013	+H
Pos	PE 36:1 (2)	C41H80NO8P	3.15963	0.124371	-1.60618	+H
Pos	PE 36:4	C41H74NO8P	0.861973	0.116138	-1.95524	+H
Pos	PE 38:2 (1)	C43H82NO8P	0.527502	0.118017	-1.3148	+H
Pos	PE 38:2 (2)	C43H82NO8P	0.586054	0.19777	-2.07836	+H
Pos	PE 38:4 (1)	C43H78NO8P	0.542635	0.0718209	-1.15185	+H
Pos	PE 38:4 (2)	C43H78NO8P	1.42243	0.112012	-1.6533	+H
Pos	PE 38:5	C43H76NO8P	1.38332	0.103187	-1.82098	+H
Pos	PE 40:2 (1)	C45H86NO8P	0.642525	0.130541	0.109165	+H
Pos	PE 40:2 (2)	C45H86NO8P	0.81719	0.258066	-1.97105	+H
neg	pentacosanoic acid	C25H50O2	1.39322	-0.00388058	-0.578304	-H
neg	Pentadecylic acid	C15H30O2	0.978028	0.0190546	-0.431162	-H
Pos	SM d18:1/C14:0	C37H75N2O6P	0.743179	0.15012	-0.778486	+H
neg	SM d18:1/C16:0	C39H79N2O6P	1.28219	0.0042723	1.06539	+CH3COO
neg	SM d18:1/C18:1	C41H81N2O6P	1.27455	-0.069056	1.17345	+CH3COO
Pos	SM d18:1/C22:0	C45H91N2O6P	0.581929	0.103067	-1.28814	+H
neg	SM d18:1/C24:0	C47H95N2O6P	2.38542	0.00261219	0.612968	+CH3COO
neg	SM d18:1/C24:1	C47H93N2O6P	1.89889	0.000899315	0.73201	+CH3COO
neg	Stearic acid (Octadecanoic acid)	C18H36O2	1.24377	-0.00760198	-0.460761	-H
Pos	TAG 42:2	C45H82O6	1.10444	0.104575	-2.6969	+NH4
Pos	TAG 46:0	C49H94O6	0.565434	0.0645859	-0.586725	+NH4
Pos	TAG 46:1	C49H92O6	0.89115	0.0148827	-0.503272	+NH4
Pos	TAG 46:2	C49H90O6	0.881469	0.131131	-0.928335	+NH4
Pos	TAG 48:0	C51H98O6	1.01716	0.0210256	-0.550144	+NH4
Pos	TAG 48:3	C51H92O6	1.29661	0.101886	-1.4582	+NH4
Pos	TAG 50:1	C53H100O6	0.977293	0.0255419	-1.35186	+NH4
Pos	TAG 50:2	C53H98O6	0.863411	0.0637725	-0.817898	+NH4
Pos	TAG 50:4	C53H94O6	1.96036	0.12833	-1.04628	+NH4
Pos	TAG 54:6	C57H98O6	1.87917	0.128198	-1.35767	+NH4
Pos	TAG 56:5	C59H104O6	1.68014	0.161563	-0.635157	+NH4
Pos	TAG 56:7	C59H100O6	1.53596	0.0372429	-1.17165	+NH4
Pos	TAG 60:9	C63H104O6	2.16829	0.192666	-0.928593	+NH4
neg	Tricosylic acid (tricosanoate)	C23H46O2	1.25373	-0.0142976	-0.795952	-H
