# Supplementary material for: Nucleolin perturbation alters membrane lipid homeostasis
Source: Royal Society of Chemistry journal article supplement (doi:10.1039/d5mo00088b), 2025-10-28
Supplement: d5mo00088b10.xlsx [file d5mo00088b10.xlsx]

## Sheet: Sheet1
Primer	Sequence
Mouse
SQLE_F	GCGTGCAATACAAGGACAAG
SQLE_R	AAGAGTCCATCCGCAACAAC
FDFT1_F	GACTTCCCCACGATCTCCCT
FDFT1_R	CCCAGTCCTGTTTGGAGGTC
HMGCS1_F	TAATTGGGCCAAACGCTCCT
HMGCS1_R	AGGGTACTCGGAGAGCATGT
HMGCR_F	CTTGTGGAATGCCTTGTGAT
HMGCR_R	AGCCGAAGCAGCACATGAT
18s_F	AAACGGCTACCACATCCAAG
18s_R	CCTCCAATGGATCCTCGTTA
Human
SQLE_F	GCCTGCCTTTCATTGGCTTC
SQLE_R	TTCCTTTTCTGCGCCTCCTG
FDFT1_F	ATCCGGACGCAGAATCTTCC
FDFT1_R	GGCAGCCAAAAGCATGACAA
HMGCR_F	GACGCAACCTTTATATCCGTTT
HMGCR_R	TTGAAAGTGCTTTCTCTGTACCC
HMGCS_F	TGCATTCAAACATAGCAACTGA
HMGCS_R	CACAGAGTATCTTAATGTTCCCCATT
UBC_F	CCTCGAGGTGGAGCCCAGTG
UBC_R	AAGATCAACCTCTGCTGATCAGGAG
